# Supplementary material
Source: publisher figshare collection journal article supplement (https://gsajournals.figshare.com/articles/dataset/_/15001164)
Supplement: Supplementary file 1 [file 1]

## Supplemental Material Legends

**Figure S1** Sequence features of the full-length *mauritiana* element *Btmar1.1* (1,573 bp) The dark grey blocks at the extremities of the nucleic acid sequence refer to the TIRs. TA TSDs are written with bold characters located towards the outer end of each TIRs. The transposase ORF is double underlined in the figure. The putative transposase sequence is given above the ORF. The bipartite NLS is in white boxes, the HTH motif is underlined, the three signature motifs of the catalytic domain motifs DD34D are in light grey boxes.

**Figure S2** Sequence features of the full-length *irritans* element *Btmar2.1* (1,807 bp). The dark grey blocks at the extremities of the nucleic acid sequence refer to the TIRs. TA TSDs are written with bold characters located towards the outer end of each TIRs. The transposase ORF is double underlined in the figure. The putative transposase sequence is given above the ORF. The bipartite NLS is in white boxes, the HTH motif is underlined, the three signature motifs of the catalytic domain motifs DD34D are in light grey boxes.

**Text file S1** All the identified MLEs sequences (fasta format) in *B. tabaci*

**Text file S2** All the identified MITEs sequences deriving from the *Tc1/mariner* superfamily (fasta format) *B. tabaci*
