# Supplementary material
Source: publisher figshare collection journal article supplement (https://gsajournals.figshare.com/articles/dataset/_/15001164)
Supplement: Supplementary file 2 [file 1]

**Table S1** Nucleic acid MLEs references used as queries in the BLASTN search (ACcession number,Species,Group)

| MLE subfamily <i>Irritans</i>   |                                     |          |
|---------------------------------|-------------------------------------|----------|
| AC.number                       | Species                             | Group    |
| L06041                          | <i>Green lacewing</i>               | Insect   |
| AY601745                        | <i>Diachasmimorpha longicaudata</i> | Insect   |
| AY601748                        | <i>Diachasmimorpha longicaudata</i> | Insect   |
| AY601746                        | <i>Psytalia fletcheri</i>           | Insect   |
| U11642                          | <i>Haematobia irritans</i>          | Insect   |
| U11658                          | <i>Anopheles gambiae</i>            | Insect   |
| U11646                          | <i>Drosophila ananassae</i>         | Insect   |
| AB056896                        | <i>Adoxophyes honmai</i>            | Insect   |
| U11649                          | <i>Mantispa pulchella</i>           | Insect   |
| AY601743                        | <i>Bactrocera dorsalis</i>          | Insect   |
| GQ398105                        | <i>Agrilus planipennis</i>          | Insect   |
| MLE Subfamily <i>Elegans</i>    |                                     |          |
| AC.number                       | Species                             |          |
| AJ437557.1                      | <i>Meloidogyne chiwoodi</i>         | Nematode |
| DQ138261                        | <i>Adineta vaga</i>                 | Rotifer  |
| DQ138276                        | <i>Adineta vaga</i>                 | Rotifer  |
| AF014939.1                      | <i>Caenorhabditis elegans</i>       | Nematode |
| MLE Subfamily <i>Cecropia</i>   |                                     |          |
| AC.number                       | Species                             |          |
| M63844                          | <i>Hyalophora cecropia</i>          | Insect   |
| D88671                          | <i>Bombyx mori</i>                  | Insect   |
| AB363005                        | <i>Bombyx mandarina</i>             | Insect   |
| AB006464                        | <i>Attacus atlas</i>                | Insect   |
| AB055186                        | <i>Hyphantria cunea</i>             | Insect   |
| AB055183                        | <i>Cephonodes hylas</i>             | Insect   |
| AB055185                        | <i>Papilio xuthus</i>               | Insect   |
| AB055187                        | <i>Traulia ornata</i>               | Insect   |
| AB055184                        | <i>Eumeta japonica</i>              | Insect   |
| AB055188                        | <i>Fungia sp. Kusabiraishi</i>      | Fungia   |
| AB055182                        | <i>Junonia almana almana</i>        | Insect   |
| AB055181                        | <i>Danaus chrysippus</i>            | Insect   |
| AF126011                        | <i>Antheraea mylitta</i>            | Insect   |
| X71979                          | <i>Girardia tigrina</i>             | dugesiid |
| MLE Subfamily <i>Mellifera</i>  |                                     |          |
| AC.number                       | Species                             |          |
| AF124047                        | <i>Ceratitis capitata</i>           | Insect   |
| AY155491                        | <i>Chymomyza amoena</i>             | Insect   |
| AY155490                        | <i>Apis mellifera</i>               | Insect   |
| AY155493                        | <i>Ceratitis capitata</i>           | Insect   |
| AY154756                        | <i>Epicauta funebris</i>            | Insect   |
| AY154754                        | <i>Apis mellifera</i>               | Insect   |
| HP496852                        | <i>Apis mellifera</i>               | Insect   |
| AF349133                        | <i>Bactrocera tryoni</i>            | Insect   |
| U08094                          | <i>Drosophila erecta</i>            | Insect   |
| U18308                          | <i>Glossina palpalis</i>            | Insect   |
| MLE Subfamily <i>Mauritiana</i> |                                     |          |
| AC.number                       | Species                             |          |

|          |                                |        |
|----------|--------------------------------|--------|
| M14653   | <i>Drosophila mauritiana</i>   | Insect |
| AF355143 | <i>Blattella germanica</i>     | Insect |
| X78906   | <i>Drosophila mauritiana</i>   | Insect |
| AF373028 | <i>Musca domestica</i>         | Insect |
| X89927   | <i>Drosophila simulans</i>     | Insect |
| X86159   | <i>Zaprionus tuberculatus</i>  | Insect |
| AF035566 | <i>Drosophila teissieri</i>    | Insect |
| AF465247 | <i>Mamestra brassicae</i>      | Insect |
| X86158   | <i>Drosophila tsacasi</i>      | Insect |
| AJ312712 | <i>Bombus terrestris</i>       | Insect |
| AJ312723 | <i>Eupelmus vuilleti</i>       | Insect |
| AY652423 | <i>Myrmica ruginodis</i>       | Insect |
| X73312   | <i>Myrmica ruginodis</i>       | Insect |
| EF418011 | <i>Pleistodontes addicotti</i> | Insect |
| EF418012 | <i>Pleistodontes addicotti</i> | Insect |
| AF51817  | <i>Solenopsis richteri</i>     | Insect |
| AF518170 | <i>Solenopsis invicta</i>      | Insect |
| AF518177 | <i>Solenopsis saevissima</i>   | Insect |
