# Supplementary material
Source: publisher figshare collection journal article supplement (https://gsajournals.figshare.com/articles/dataset/_/15001164)
Supplement: Supplementary file 3 [file 1]

>MITE\_T\_64

gagtccctttatactgagagtcaagacaagtcgggctcatggatgtcacaaacgggaataaagattacagaaattgaacgttttcgtaatctttgatc  
ggcccatctcaaatgcctttctccgttctcctctcatttcgtttgttccttgccgaacccgctattccctgggccattccagattataatctttgcaattg  
gtgaaaatgtaatctttattcccggtttgtgacattgtgaaggcctaaaatacgggtaaccaatcagaaatggatgcgcatgtcttgactctcagtata  
aagggactctagtaaaagctccacctgtcgtagtagagtcctttataccagagtaacgacaactcgattatcagctgactggcagccgacct  
tggctggccatggaggccgaaactagtgactcaaacggacgatattgagggataaggatcaggaatcctgcgatgtctgtcacacaaaaaca  
acaacatcaacaaattgatcaattaaagaaaatgagattgggtttgtgaataattcttattctatttcattttggaccgatggaaataacaattttctc  
TCGATAAACCAACAATCATGTAagattttcattattctgttcacattcgaggtaccgccatcttggtgcactagtttcggcctccatg  
agcgagaaccaatcagaattggatttttttaggccacttcagcccaatcctggcccaaccaaagtgagttgtcgtaactctgggtataaaggg  
actc

>MITE\_T\_70

cagtagactctggattatccggcttcgtattatccggactttggattatccggcttcgtattatccggactctggattatccggcttcgtattatccgga  
ctctggattatccggatcgattttacaacatgtaactacgtacgcattccgataagtgaagcgatccgcggagaagcggctcgcaaggcatatttg  
cgcctgcaaggctgaaggaatacttcacgcattgcgcaaacagtgaggtcggcgtggaacgcattagcgctactagattgcatagatacttct  
cgcattacgcaaacgcagtgagtcggttagctgaacacgcacattagcggcttcAAGACTGCattaatacttcacgcattccgcg  
ctttaatcggttattgtaatttatcggttcggctaccattcacatcacaaTTGAGTCATTCgggttgccgtaaacctttaaactcgtgttggt  
atgtacatgatgtatacataaagaataactgtgatGTTGGTTgttggtgtgtgttactattattatccggatttcttttcatccggatcgggc  
ccggcaccaattaatccgataaccagagctactg

>MITE\_T\_219

CGCGGTTTTCCACTTAAGGTGAATCTACAGCGGTGCCTAATAAGAAATTTTTCCGCGCAC  
GGAGCAaccgctgtgttttgatttttggccacgctACTAGAGTCCGTGCAGCCCCACGtaagtccttgagcttttatg  
aaagttaaaggaatttctattgaaatcgaagagtcataagttctGCCATAACAATCTCCTtctattgacactaaaaagacgtgaa  
aagtaatttatgaagctctgaaactgatccgaaaaaagaagggtaagcatgatgaccttgatgcaaccaattgcgattgatcgctctcagcat  
ttgcagatatctctcccaccgtgagctatctctcgcacttacagatatccataagagaaactgggatcgaGATatagttttattattaaactt  
tcgaagctcgctgtttgttctaagcattccagacgtatgctgctaaaagttagtgccttagaaattaatttctatcggtatatttaaataatcactgatt  
tcggagccgatttttagcagcgacgtgggtggatttttcggaactgcagctgaagattcaccttaagCGATAAACGGCG

>MITE\_T\_249

cagtggactctcgataattcgaaattgaaggaatcggccttttctcgaattagcgaggtttcgaaatagagagagttcgaattaaagagattcatg  
tgaggaaatttcgaattagagaggttcgaatgtAGAGAGGCCAAATGGACGGATCTAAGTAagtcaaaaggaacaaaa  
atatcggtttattttattttttttttttttttttattatctgGTTTATTAGtataaaattacactaagttaTCATTAagtattttattttattttaatttt  
aaaattattaattacatgtttacattttgacaatcctatcagctctttcagacaccggccaggtacataaacagttgacttcgaattgtagagagaatgt  
accgtcttatttcgaattatagagggagaacctatttactccacGTTTCGAagtacagagagaattttcgcgaatttcgaatcgtagag  
ggccgcccagcttaaaaatttcgaaataacgagtgagaaaaatacattgattttctcgaatcatcgagagattttcaagggaaggactttcc  
ttcgaattagcgaggttttcgaattatcgagagtcactg

>MITE\_T\_575

acaattgaatcagtaagttcgaaaaacacaccaactcggaaaaaaaattgttcgggaaacacctaataactcgcagcgggtgCTAGTTG  
AGAAGAAGTTAGtttgagaaaaaccttttgggtgccaaaggactaGTACTTAAAGACTTtttaaagcaccaagttgaaatc  
gataccatgtttgatgacagagaatgaagcgtttaaaaatttcgagttgggtgcgttttcgttctaccgacttttgatactgattttcatagtctgc  
cctgaaaaatgtatattttcgacctgagtaacgctgaatatttacaatAACTTGTTGGTGCAAGGTATgatgaaccgaaaaaaga  
aaaccgcaagatcaaatggtcaccggtttcccttgaaatggccaaaaattggcatttccatgaaatacttcgattttccctttcccgctcgctgttc  
gagcacttccgattgcaatttcgaaatttcgaaattttcttttgcgtgcagatacttctatccataagtgttattaaaccgtaaaaaagtgaaaatcgaa  
aacaaaatccgagttggtgtgttttcgaactcactgattcaattt

>MITE\_T\_848

cagtggactctcgataattcgaaattgaagagaaacggccttttctcgaattagcgaggtttcgaaataaagagagttcgcATTAAAGAG  
ATTCCATGTGGAGAAATTCGAAGTATAGAGAGGCTCGAATATAGagggggcaaatggacggatttacg  
ccaaaaggaacaaaaaatattagtttATTTCTTACGGAAGTAAAAATTACGGGGCTAAGTTAATATTAact  
aattattaattattatatttaatttttaaattattaattattattaattactGTACTCACACAAGAGTAACCTAAAATACTAGa  
gttttttttggagtaGTCtgcattgacttcgaattgtagagggcaTGTgccgtcttatttcgaattatagaggggaagaCCATATTC  
ACTtccacacttcgaattacagagagaattttcgtcgaatttctaattatagagggccgcccagcttaaaaattttgaattaacgagggggaga  
aaaatacattgattttctcgaattatcgacagattttcaagggaacagactttcctcgaattaacgaggttttcgaattatcgagagtcactg

>MITE\_T\_1112

CAGTAAGagctcgtaagacgaaaaatgaaggacacaaaaaaatttcgtcataagcggcttttcgtcttaaccgttctctgcttaagacgaa  
attttcggcatAAGCAGCAACTGCGCTTGAAAGTTGCGCTGGTATCCGCTATTTTAAGTGAATG  
ACTTTTTGAAAGATTATTATCtattagtttaaatTTTTAAATTTatataatacgaattcaaatttgaatttttttaaaatcgcaaaT  
CGGTTTATCGTCAACTGTCAATTGCATCTCAGTCATCCAGCAAAACAGAGGATACCCACA  
ATCTACTCTCAACCTACTCTTTTTATGTCAAGATACGCAAACTAAGTCTATTTTCCCTAA  
GAATTGgcttttttgcgtttttacccaatttcaggggagaaaatcggaatttttcttcgcCTGAACCGGCTTTAGTTatgggtc  
aaaatttcaaattctcgtcttatccgtattttttacattgactcttatggaagtgtcaagggaccgaaaaaaatttcgtcttaagcggattttgtcttaa  
ccgtatttcgtcttaacgagctttactg

>MITE\_T\_1270

atggaccactcggcaaggcacgaattcaagcattctgatacatgtttcttaaccaggatttcacgtagaacacgattcgcgcaacgaaatttaccg  
aaactaactcctgacgaagatattaaccttttttttttttttttttttttttttttttttgcgtggttagtggttatattccattgaaactgcccgtgaa  
aagaaactaaaagctctacgtgagtcacaaatcgcgactacaacagtttcagcaagcctctcaatcgagcactgttcatttcccaccatgtgtgttc  
aaattataagcaatttgctatagctgagccaaagcgtcataattgaggttgccagattttcatatcgagagactgtcatgataatgttcagcgcgcg  
atgtgaatcacgtagagcattgagttttatgagcgggtggttgaattcacgcacaggaatcattcaATATCTTTGTGAAGAGTA  
GATTCCggcaattttgtgtgcgcacgtgttctacgtaaaatttggttaaaaaaacatgtatcagaatgctgaattcgtacctgtctagtgtg  
ccat

>MITE\_T\_1310

AGGCCAGTCGGTTCTGTCTATCCCTACACATTGAAATCTATGTCACTATCTGCCCCGTATT  
CTCAAATTCTACCAAATGGAAttctaaaaacaattttgtcagAGAGGTTTAAATGTGTTCTTTCAATTG  
ACGTGTAAATACCTcgattttcctaaaaatacaattttgagacattttgaaatttcattttattttaatgatttttctactCCAAGTCT  
TCTAAAACTCTATTTAACAACATATCAGAACAATCATATGTCAATTTAAAGAGTAAATTT  
AGAGCtatatagcaaaaaaaaagttttgaaaaatccaatcAGTAGATCTGTTCGATCCtgagaaaaaggggaaaaagtgtT  
CAAAATCTAACTTTTTAGTGCGTtgcaaaaagaagaagaagaatgtttttttgacctgACCTTGCGTGACA  
AAAAAAGCTGCAACTCCTCCAATAATCACtggaatttaaaaaactaaagcTAAAAATGGTCCTGAGA  
ATGTGTATAATTTATTGggataaaaattggaatcgatttttttaaaaaataaaaaaaaccagaaccGACTGTCCT

>MITE\_T\_1334

acttgaaaccgcgttttgagaaaaacgcatttaaagttttgttttgatgtactgcgagacttttctatgcaggtaccctgttctGGTGTTTTT  
GGGCGACCTAACCCTTgtattgaaggatgccgggtagattttgcgatacattttgggttactctctaataatattaataaaaaaagcg  
GTGTAAAGGCCATTATTAcaccaacagtcattttggtggcaatatgaagtataagtcattttaatcacgcattgaaacgcaaat  
gaaagaatatcgatagtgagtgAAGAAAGGGGTAACTTGCACCTTtaggcccttaagtttataggcctgcttataggtcggtc  
ttgcacccatcgatccagtggtcctgacttaactcggaaaaaaaagggtttcgacctcgagccgttacctatctatattctatcgctaccacagcata  
gtccaaggtacgtagaatccgaaaagcagatgggcgtaataacgacctatacgctatgcgtgttcttggtgcgggtgcctcaattgaacTAT  
GACGTAGTAGCTAAATCAGTCTACAGCAGAGTTTCAAGT

>MITE\_T\_1999

TCAATGGTTTTATCATTGATTGATTGAGGGCACACCGACGTTTGCTGAGAGAgaaatgtgtg  
tgtttttgcactttttcttttttagtacATGAAATGCGAATTGCTACAGTTTATTCGTGATTATGTAAACCGTT  
AATTACTTATctttacaatgggcctgttgcaacttttgctagagcaaaaaataagagttgtttctttagataatgcctcaaaaatcacgatga  
gcgcacgcggcaaagtctgaaatgcactcataactcacaatctgcgtaagaaatttgcgttttttaagcttcccgttcaaaaacgatactacggca  
caggtgaacattttgtagaggagtcgctccatcgctggcgatattcatcggtggcgacgcttgcgagttccgcgcttagttcgaggagagttca  
aggtcaatcaattcgggcgtggaaaatatgaacgttaacacaccgattgttatctggtctaattccaggttcaggtgttatctcgctccatcaaacgtgtt  
ttgacggattggcgctggccatgatgattattgccgacgattgaacgactcctcttcaaaaatgttcacctgtgccgtagtatcgttttgaagcagg  
aagctcaaaaaaccgcaaatctttacgcagactgtgaagttatgagtgacattacagactttgccgatgcgctcatcgtagttttgaggcattatcta  
taagaaacaactctattttgtcttagcaaaagtttgcaacaggccattga

>MITE\_T\_2366

gattataatctttgcaatagaccactagacaaggtacgaatttcagcattcggACACATGTTtcgtaattaaaatttcacgtaaaacacgatg  
cgcaacaacaaaattaccgaaattaactccttacgaagctatttagtgattcttgatgcgtgaattcaaaccaccgggtcatgaaaactcaatgctct  
acgtgattcacatggcgcgctaaacattatcatgacagtccttGCGAtatagaaatctggcaacctcagtttgacgctttggctcagctatagc  
aaattgcttatagtttgaacgacacgATGGGgtatgaacattgctcgattgaaaagcttgctgaaccggttgtagtgcgcgatttgactcacgtg  
gagctttgagtttctctgagcgggcagttcaaatctcgtaccaaattgtggaataaaaacggtgatattctttaggagttggtttcagtaatttctg  
tgcacgaatcatgttctacgtgaaattctgttaagaaactgtatcagattgcttaaatcgtacctgtctagcgggtCATTAGCGAAAAT  
GTAATc

>MITE\_T\_2452

cagggtgtcccaggattaagtgcGGATATTGAAGAGGCCGATTCTTTTCGGTcataaaaaaagttttgtaataacttttct  
tctaaaaatgctttccctgggggccacggcccccaagttggagaaaaaaatcgctttttaacactGTAACAATGTTTATGAA  
CCAATATTAATGGAAATTGGCGTCTgggggtaatttttagcgttctCTTCATTGCTGACCtccaaaaagagaaa  
acttgtttagatggaGGGTTTAGGGGAAAACCGAACCTAAAAGTGGCAAAAATTAATGTTGCTAG  
CGacagaaattgattttgacggctCCACTAGATTGAGCGTTGTAAAATATTGCGAAGatgttttctccgtgtttccg  
cTATAACTcgtcgttttcgagataataggacTAATAGAGGATAATAGGAGCCAATAACAGGGGAATAG  
GGGGGCCTGGggcccccagggaagcggttttgaaaaaaagttaaccaTAAAACGTCTTCTTATGACACAA  
AGAATCTaatccttcaattctgactcaATCCTGGGAcgtgggacaccctg

>MITE\_T\_2498

cagtagactctggattatccggattaattgggtgccgggcccgatccggatgaaaaagaaatccggataatagtaataaacacaaacaccaccaa  
ccaacaccacagtattcttattatgtatacatcatgtacataccaacacgaatttaaaagggttaacgcctaaactgaacgactcaatgggtgattgtaaa  
tggtagccgacaacgataaattagtttagtttagttaattttatttaacgacgataCGATTAAACgtgcaatacgtgaagtatgcatgca  
gtctttagccgctaattgtacGTTTTAGGCAAACCTAagcgactgcactgcgtttggcgtaatgcgagaagtatttatgcaatctagta  
ggcgctaattgcgttcacgcccacactcactgtttggcgcaatgcgtgaagtattccttcagccttgtagggcgccaatatgccttgacacgcttct  
ccaaGGATCCgttcacttatcggaatgcgtacttagttacaagggtgcaaaattgatccggataatccagagtccggataatacgaagccgg  
ataatccagagtctactg

>MITE\_T\_2608

gagtccctttactgagagtcaagacaatgtgaatccatttctgattgggtcccgtatttttaggcctccacggagtcacaaacgggaatacagatta  
cattttcaccgattgcaaagattataatctagaatggaccaggggaattactagagtagcctttatagacagagtatggccatttctgttccgggttttctt  
ggctctGAGCGAATAGGCTaacacgatgctcttagggccgtaataaacaacaagatggccgttatcagcaagcaagattgaggtta  
tgcacatcttcatcctctgtgttAAAGatgaaaggcaatttaacaatgctttatgtgttttcgtgtgctattcgtagatatgccgtttaaattgtt  
actgccgcataattgaaattttgtcaaattagcttctcatcgatgttgcggcgagccgccatctgtttgtttatttaccggcactaagagcatcatgaa  
gcctaaaaactcgttgaccaatcaaaaaacggaacagtttctgtagtaaaaagatacgaatggccatactctgtctataaaggctactc

>MITE\_T\_2994

cagggtgtccctggattaagtacgaatattgaagtaGTTGATTTCATTGGGTATAAAACAGATGTTTTTgtagtataact  
tttttttccaaaaacgctttacCTGGGGGCTACGGCCCCGCCGAAGttggggaaaaaattatctttctaACACTGGAA  
CAGTGTTCatcaaccaatattaatgaaaattgggtgaatggaggttaatttttagcgctttttcattttggatctccaaaaaagggaacgcatt  
ttgaggggggggggggtcaggggaGGGCATTGAACcaaaaaaagggttaaaattagTGTTTccagcgacaaaaattgattttggca  
GCACTACTAGATgtagcgttgaaaaatattgagaaaaatgcgttttgcgtttttcgtatgactcgtcgttttcgagataataggacTG  
AATGGAGCGCGGATGGGTTCGGAGGGGGGTGGGCGGGGGAGgtccccagggaagcggttttgggaaaa  
aagttatactacaaaaacgtcttttttgacaaaTGAATCGACTCCCtcaatattcgacttgcctgagacaccctg

>MITE\_T\_3075

attgaatcagtgagttcgaaaacacacgggttttttcgattttcactttttgcggtttagtaacacttggATAGatgcatctgcacgcaaaaggaaa  
tttcgaaattgcaatcggaagtgtcgaacacgcgacgggaaaaaggaaaaaatcgaaagtatttcattggaaataactaattttggccatttcaagg  
gaaacgcggtgaccatccgattttgcaattttctgttttcggttcagtatacctgtatcAACAAGTTATatgaatattcaagcgttattcaggt  
cgaaaaatataaagttttcagggcagactatgaaaaatcagtatctgaaagtcggtgagaacgaaaacacaccaacttgaaatttttaaacgctt  
aattctctgtcatcaaacatgggtgtatcgatttcaactagggtgctttacaaagtctctaagtactgtccttcggcaccaaaaaagggttttctaaaactaa  
cttcttcgctcgtcgcagtttttaggtgttctcgaacaattttttttccgagttggtgtgttttcgaactcactgattcaat

>MITE\_T\_3339

acgttgcatggtgtcaacgaacccaaaatctgatcatggagtcacCGATTGTTGTCGTCATgctcaggcagtaaaacgcaaaaat  
gggccttgagcatggtgtcaacgatcacggtgtcaacaacagaagaatatattccttatgattacaattaaaaattattgcacAGGAGAG  
GTTTGGGTCACGTATAGTTAGATTTGGTTAGTTTAGGTCACGAAATATGTGTGGTTCGATT  
AGGTAGGTAAGGTTAAAGTTAGGTAGGGTAAGGCCGGGGAAAGACAAGTTCTCGGAAA  
GTCGGTTAGGTCTTGTTCAGGTAAAGTTGGtaaggtaagggttaggttaggttagtatAGGTTGGAGtaaataa  
cacacgaaaaacaagacttgaaattgagtCTTGAGTTTTGATATATAGTGGGACGTTTTAAGTTTCGTTaac  
gtcgtgatcgttgacaccgtgatcatatttcataagagtcagaatttttttttcggtgatcatagtgtaacaaaaacttagaaaaactgtttgtga  
caccgtaatcgttgacaccatgctact

>MITE\_T\_3388

Aacaaataatggaccactagacaaaagcacgaatttaagcattctgatacatgtttcttgaccagaatttcacgtagaacacgattagcgcaacgaa  
aattactgaaactaactcctaacgaagatattaacgtttttatttcacattgggttacgaggaatttgaactgccgctcacaagaaactcaagctcta  
cgtgaatcaaactcgcgattacaacgggttcaacaagcttctcaatcgagtaagtgtcattttccagcatgtgtgttcaactataagcaatttgctac  
agctgagccaaagcgtcaagattgaggttgccagatttttatcacagagactgtcattataacgttttagtgcgcgatgtgaatcacgtagagcat

tgagtttctatgagcgggtagttgaattcacgcaccaataatcattaaatatcttcgtaaggagtaattgcggaattttgggtgcgcatcggttt  
acgtggatatttgggaagaacatgtatcagaatgttgaaattcgtaacctgtctagtggtccattgtatgt

>MITE\_T\_3629

AAACTCAATGGACCCCTAGACAAGGTagaaagtaagcattctgatacatgttctgacctaatttcatgttgaacacga  
ttcgcgcaacgaaaactgaaattaacttctaactaagatatattaatgtttgtGACGCGTcaattcaaacctccgctcatgaaaacgcaatg  
gtctCCAAGTGAATCCAAGCGCcactaaacgttaccatgacagtctctacaaTATGAAAATCTCACCCacctcaatt  
ttgacgttttggctcagctacagcaagtTGTATATAGTTTGGACAACACAGGGTGGGGGagtgaaacattgcttgattgag  
aagcctgccgaaaccgtttagtacgcAATTGGACTtctgtagagcattgagtttcttgaccgtacaattcaaattcccgtaatcaatgt  
aaaataaaaacgttaatatcttacataggagttgattcagtaattctcGATGCaagaattgtgtttacgtgaaattctgggtaagaacatgtatc  
ggaatgcttaaTTTCGTaactgtctggtgggtccattggatT

>MITE\_T\_3705

atggaccactagacaagatacgaatttcagcattctgatacatgtttctcacaaaattttacgtaaaacataCGATgggtacaacgaaaattac  
cgaaattaactccttccaaagatatattaatgattcttggtgctgtaattgaaaccacccgcccatgaaaactcaatgctttacgtgactcacatcgcg  
cgtaaacgttatcacgaacgtctctgcgataaaaaaaatctggcaacctcaatttgacgcttgggtcacaatcagctatagcaaattacttata  
gtttgaaaaaaacatgggtgggaaatgaacattgctcgattgagaagcttgctgaaaccgctgtagtgcgcgatttgactcacgtagagctttgag  
tttctgtgatgagcggggttcaaattctcgtactaatgtgaaataaaaatgttaatatctcgttaggagttgggttcagtaatttcgttgaca  
aatcggttttactgtaattctgggtgaagagtcattgtatcagaatgcttaattcgtaacctgtccagtggtccat

>MITE\_T\_3712

cactgggaaaaacacattggatctagagtcagactcttgaacacattgacaagaaaaatactcttgattcaatcggttttgcctgaatcaaaac  
gaaatccgcttaaatgaagaggttggttcttgatttaagcttgattctgattgaatcaagagtacttttcttatcgatgttttaagtgtctggactctag  
attcaatgtgtgttttttcagtgcatgtaacacatattagcgcctacaagactgcacgaatacttcacgcattgcatcaaacacagtgcggttattgt  
ggtcagcgtgaaacggatagcgcctacaagaatgcatgaatacttcacgcattgcgccaacacagtgcggtcagcgtgaaacgcataccgcc  
tacaaggctgcgtgaatacttcacgcattgcgcctACACGGTGcgggttaaatgaagagacttggttcttgatttaattgtacgagtagattct  
gattgaatcaagagtacttttctgtcgatgttttaagagctggtgactctagatccaatgtgttttttccagtg

>MITE\_T\_3804

cacggaaaaaacggtttTAGGATCGGGTACTGCGGCGCAGGGCCCGGCCCCAAACCcgggtaggtgaaat  
tgcttcaTAGTCCAGTCATATGGGGCCTTTATGCGGTTTTAAgagcggaaactttttctcaNGTCGGGCC  
CAAGCTGAaggtagggtccagccctacctgcatatcgacgccaagcgtaaaaaatccgtgcCCTCGCGTGGATTTCGAA  
CTCGCATCGCAGAGATGGTAGACCAGCGCGGTACCACCAGGCTACGAGGCCTCGCTGAT  
TGAGGCAGCGAATTTACGCCTCTTGAGTGCAATTTCCCTCTCGGCATATCAATGACACC  
TGATCATACGGGCATCAGTCCTCAACTGGCGTTCAGCGAGAAATGACGGTATTTCGCTActc  
ctgcgcattgcgcgcgcattgcgcagtaactAAAACCTCAAAACCCAGTCGGTGGCAGCGTTCGCAACTAG  
CTCATGGAGGTCTCGTGCCTGTAACTGTAGGGACGTGAGCTACCTCTCACTGCCCTACC  
TCTAGTTAGGGCCCcatcctaaactcgtttttccgtg

>MITE\_T\_3815

cagtggaactctgataattcgaaattgaagggaatcggtttttcttgaattagcgaggtttcgaaataaagagagttcgaattaaagagattccat  
gtagaaaaatttcgaattagagaggttcgaattatagagggaaggcgccatctgaattcgaattagagaggttcgaattatagagggaaggcgcc  
atctgaattcgaattatagaggggcaaatggacggatttacgcaaaaggcttttaggtcaaaggctcaagctcttcagacacccaggtacataaa  
cagttgacttcgaattgtagagggaatgtaccgtcttatttcgaattatagaggggagagCCGTACTTAacctccaaattttgaattacagaga  
gaattttcgtcgcaatttcgaattatagaggccacgccactttaaaaatttcgaattaacgaggggagaaaaatacattgattttctcgaactatcg  
agagattttcaagggaacagactttcctcgaattaacgaggttttcgaattatcgaggttcgaattatagagAGTCCACTG

>MITE\_T\_4146

atggaccactagacaagggtacggatttcagcattctgatacatgtttttaacaaaaatttcacgtaaaacacgatgcgcacaacaaaaattaccga  
tataaacttcttacgaagatatattaatgattttgatgcgactgatgcgtaattcaaaccacccgctcatgaaaactcaatgctctactgattcacat  
cgcgcgctaaacgttaacATGACaatatctgcgatttaaaaatgtggcaacctcaattttgacgcttgggtcagctatagcaaattgctgttagt  
ttgaacaacacatgggtgggaaatgaacattgctcgattaagaagcttgctgaaaccgtttagtgcgcattttactcacgtagaactttgagttctt  
gtgagcgggcagttcaaatttctgtacccaatgtgaaataaaaatgttgatatcttcgttaggagtttagttcagtaatatatacattgcgctaactcggt  
tctactgtgaaattgtggttaagaacatgtatcagattgcttaattcgtaacctgtctagtggccat

>MITE\_T\_4200

cactgaaaaaaattctcggcggttttaccaagggtcggttggtaccttcaccacctcacttttttaccaattattggtaattttaccaagacagactggta  
agcttacctaaaaaccggtatttttactgttttttttttcagggaagaaTACCACTCTTATTGGTAagcaattctcggttaactttgcca  
ttttatctcggtagttctaccatagtcgataaaaaatattggcggttttaccggggtccagtaaaattaccgagaaagttcaatagttttggcgagattt

ctcggtaaaattaccaattccataaatgggtcattttaccaagaaaaaactgggatcaaatggactggattttgcaattaggaactataaattctatctc  
gggtctaaaaacaacgtatgtgccattagttccctatgcatacaagtggttttccagatgagccaaaatttatagttcaaaattgcaaaatgcagtccaa  
atagaaccctgaattcgtggtaattttacccttttcttggtaaatacaccgagatttttttccagtg

>MITE\_T\_4232

ctcaatggggccactagacaaggtacgaatttcagcattctgatacatgtttcttaaccaaatttcacgtgaaacacgatacgcacagcgaaaatta  
ccgaaatcaactccttacgaaggtatttaattgattcttgatgcgtgaattcaaaccacccgctcatgaaaactcaatactctacgtgattcacatcgc  
gcgctaaacgftactatcacagtctctgcgatataaaaaatctggcaaccgcaatcttgacgctttgcctcagctatagcaaattgccaatagtttgaa  
caacacatgggtgggaaatgaacactgctcgatagagaagattgccgaaaccgttgtagtgcgcgatttgactcatgtagagctttgagtttcttg  
agcgggcagttcaaatcttgaaccaatgtgaataaaatcttaatatcttcgttaggagttgggttcagtaattttccttgGCGattcgtgttct  
acgtgaaattctggtaagaacatgtgtcagaatcctttaactcgtacctgtctagtagtccattaag

>MITE\_T\_4253

gagtcctttataccagagatacgaactcacttttggttggggccaggggtgggctgaaagtggcctaaaaaaaatccaattctgattgggtct  
cgctcatggaggccgaaactagagtcctttataccagagtaacgacaactcgattatcagctgactggcagccgaccttggtggccatgga  
ggccgaaactagtgcactcaaacgaacgatattggggggagaaggatcaggaatcctgcgatgtctgtcacacagaacaacaacatcaacaa  
attgatcaattaaaaagaaaatgagattgggttgtaataatttctaattctattttcatttggaccgatggcaataacaattactctgataaaccaca  
attaggtaatttttatttctgttcacatacaggtaccgaccttgggtgcactagtttcggcctccatgagcgagaaccaatcagaattggatt  
tttttaggccactttcagcccaatcctggcccaacaaaagtgagttgtcgttactctgggtataaagggactc

>MITE\_T\_5238

atggaccactagacattaacgtacgaatttaagcggtcTGATTTATActtctttaccagaatttcacgtagaacacgaaacgcgcactgaaa  
ATAACTAAAATCATCTCCTAAGGAAGctatttaattttcttgatgcgtgaatttaacctcccgtcaagaaaactcaatgctc  
tgcgtgagtc aaatcatgCCCTAAACGTTACCATgctagtctctgcgatagaaagtctggcaacctcaatcttgacactttggctca  
gctacagcaagttgtaatatgttgaacgacacagGGTGGGGAATGAagagtgtcgtgattgagaaggttgctgaaccattgtattgc  
gcgatttgactcacgtagagctttgagtttctgtgagcgggcagttcaaatctcctcaacaatgtaaaataaaaaacgtcaatatcttcgttaagtgt  
tggttcagtaattttgttacggagatcgtgttctacgtgaaatttgggtcaagaatacgtatcagaatgcttaatttgtacctgtctgggtggtccat

>MITE\_T\_5251

aggtgaatccaggggttcgattagggataattcaaggtTAGAGATAGCGCCTATGGAACGCCGTTTGTACGAAA  
ACCTATTTTTAGGGGGGAGAAGAGCGCCACCAGTCACcgctgagaatttcacttttcttcgacgattactgaaat  
aataatcctcaaaattacaaaaagcagatccacaagatatattacttttcttgatttttgagccaaaaatatttgcaattaggtactacaagcgag  
agaaagtacgggttgaaacttcagctcagcggcgggcgggcgccgagcgcgcaaatgaatccctcatgttctgtctctctccattgccgcaag  
gggaattactttccgccgtagttacgactttattttgggaatttgagaagatttttaactgagcgttctcaagtagttgccatatccctggatctc  
taatctgaataagtattacgctttttatttttggcaaatatatacggctattctgagcagcgcgacatGGTGACCAAATCTGGAAG  
TTCCAAGCTTTGATTACCT

>MITE\_T\_5297

atggaccactaggaaggtacgaatttttagcattctgatacatgtttcttaaaaaattttacgtaaaacacgatgcacacaacaaaaattacagaa  
attaactccttacgaagatatattaatgattcttaatgcgtgaattcaaaccacccgctcatgaaaactcaatgctctacgtgattcacatcgcgctc  
aacgtttatcatgacagtctctgcgatataaaaaatctggcaatctcaatcttgacgctttggctcagttatagcaaattgctaattgttgaacaacaca  
tggtgggaaatgaacattgctcgattgagaagcttgctgaaaccgttgagtgggcgatttgactcacgtagagttttgagttttgtgagcgggc  
agttcaaatctcgtgaaccaatgtgaataaaaaacgttaatatcttggtaggaattgggttccgtaattttcgttggtgaatcggtctctacgtgaaatt  
ctggtaagaacatgtatcagatcgcttaattcgaccttgtctagtggtccat

>MITE\_T\_5382

atggaccactagacaaggtacgaatttaagcgatctgatccatctttcttaaccagaatttcacgtagaaaaagattcacacaacgaaaattactga  
aagcaactcctaacgataatattaacgtttttatttcacattgggttacgaggaatttgaaactgccgctcacaagaaactcaaagctctacgtgagtc  
aatcgccactacaacgggttcagcaagctcctcaatcgagcgatgttcatttccaccatgtgtgttcaaaactattagcaatttgctataactgag  
ccaaagcgtcaagattgaggttgctagatttttatatcgagagactgtcatgataacgttttagcgcgcgatgtgaatcacgtagagcattgagttt  
catgagcgggtgggttgaaattcacgcatcaagaatcaataaatatcttcgtaaggagttgatttcggtaattttcgttggtgtgcaacgtattctacgtaa  
aattttggctgagaaacatgtatcagaatgtgaatttcataacctgtctagtgatccat

>MITE\_T\_5428

atggaccactagacaaggtgcgaatttaagcaatctgatacatgtttcttaaccagaatttcacgtagaacacgattaacgcaatgaattactgaa  
acgaactcctaacgaagatattaacgtttttacttcacattgggttacgaggaatttgaaactgccgctcacaagaaactcaaagctctacgtgagtc  
aaccgtgcactacaacgggttcagcaatcttctcaatcgagcaatgttcatttccaccattgtgttcaaaactataagcaatttgctatagctgagcc  
aaagcgtcaaaattgaggttgccagattttaatatagcagagactgtcatgataacgttttagcgcgcgatgtgaatcacgtggagcgttgagtttc

>MITE T 6696

ccctgctaaaaatggtgagtagacaTGAGtggaatacaaagtcatatgaatagaattttaaCTCATATGAATAGGATTTCAA  
TTTATATGAATAGgatttcaacttatagaatagaattcaactcatatgagcagaatttctctatccACTTTTCGCCAACTTC  
TATGACTAtagagattccaactcatatgactagagatttcaactcacatgagttcagcggtgaatctaccgtgtccgatatctcagaaactagt  
caccgcatcaaaaaatcatgagaacaaatgttttttttcaaatttacataaaaCGTCGGTGTCTCTGGTCAGAAgcagc  
acttctgaaaaatgaaaaaaaaaattgaattcatatgagttgaacttttctactctgatGAGTaaaatattctagtgatattagtggaaatttctctc  
atatgagTAGGGGTTCAACTCATGTAAGTAAGaagttctactcatgtgagttggcgaattctgaatagcctactcgtcatttt  
agcaaGG

>MITE\_T\_6873

aaacaatggagatgttgcatgtgtgacggatttgcgatttgaccattgattcttacgtaacagtttgcaagaaacacgatgggtgccactggttttct  
gaaattatccccaagctcaaaaaagctctcaaaagtgaaggccaaaatggaggggatatcccaccctaccctgagagtccacctctacatcaaa  
acaaactctcatgcaaagatagggagcaaatggagcaaatatagcagggttgccactttatttggggactccaaaactgaaaacacagca  
accctgctaattgtatttgcctctatttgcagtgagagtttggatgtagaggtggactctcagggtaggggtgggatatccctccatttggcc  
tctttttgagagctttttgagcttgggggataatttcagagaaaaccagtggcaccattgtgtttcttgcgaactttacataagaatcaatggtaa  
attgcaaatccctcatatACACAACACCTCCATTGCTT

>MITE\_T\_6980

tactccgtgctaaggaagaacggcgatgatccttcagacgttgccatatttccctccataaagAACGAACCCACCAGGAAAA  
TGCTGAATATTTCCCCCTccaattttctacaaaatttgcctgcaatgaagatgttgcatgtgtgaggaatttgcgattggaccattgatt  
cttatgtaaaggtcgcgagaaacacgatagtccactggttttctctgaaattaactccaagctcaaaaaatttctcaagttgaggccaaatg  
gaggggatatcccaccctaccctgagagtccatccctacatcaaaacaaaccctcatgcaaagatagggagcaatacattagcagggttgcc  
gtgttttcagtttagagtcaccaaatgaatggcagccctatcaatgtatttgcctctatcttgcacggagagttgtcctgATGACTCCA  
CTTtaggtggactctcagggtaggggtgggatatccctccatttggcctcaactgagagctttttttagcttgggagttgatttcagagaaa  
accagtggcactatcgttttctcgcgaattttacatatgaatcaacagtcgaatcgcaattcctcacacatgcaacatctccattttatctacat  
ctgaaaatcagaagggaaaatatcgtaacttcctaaaaataaatatttgcggaggaaatttggcaacatgagagtgtcatacgggtgttctt  
ccttaacgcGGCTGTG

>MITE\_T\_6983

CCCAAGTAGCACGGGGTTCTATTTTCTGTCTAGCTTTATTTTAGAAATTGCCTATTTTCTA  
GACAGAAAAgtaaaatagagagaaaatggaaagaaaatagatgtatcaaatagaagtaagaaaattattaaaaaacttattttctGT  
CTATGTTCCGGACACTAAATACAAGGaaaacaaacaatttgtgtctacattctgtgtttttctatctgtttttagattttaaat  
ttctaagaaataCATGcagaaaatatcaatttttctctattttccaactggtttttgatatttttctaaggaAATTAGCCCTATCAAT  
TTTCTTGACGGAAAATAGATCCATTTTGTAGACAGGAAATAGacctattttcttggtaaatagtGAAAC  
TCACTCTCAATCGTCTGTCTACTTCCCATACTGTTAgtctattttcttattttccaaatttgtttaattttattttttttt  
tttttcataaaatattttcattatgcTACTTGGG

>MITE\_T\_7097

cactgggaaaaaacacattggatctagagctcagactcttgaacacattgacaagaaaaaggactcttgattccagcagatttggaccgcgtta  
aacagaaaggaaccaagccacatcagctattgccaatttaaccgggcaatttaattttacatgaaaacgggtgtgcggattttaatgcaatttc  
agtaaattttctcatagtagaagcaaatcctgaaattttcaaagcaatccgcacaaacgttctctcgtaaacaaataaattgcctacttaaattg  
gcaatagctgatgtggcttgggttcttctgttaaactgtatccatttaagcttaaatcaaaaggaaatccgctccaattaagaggcttgggttctgatt  
taagcttaaatctgattgaatcaagagtatttttctgtcagatgttttaagagtctggactctagatccaatgtgtttttttttttttttttttttt  
ttttccagtg

>MITE\_T\_7104

ATTACAGTAGACACTGGATTATCctgattaattgggtgccgggcccgatccggataataatagtaaacacaaacaccaccaac  
caacactacagtattcttattatgtatacatcatgtacataccaacacgaatttaaaagggttaacgcaaattgaacgactcaatgggtgattgtgaatg  
gtagccgacaacgataaattacaatacaacgattaaagcgcgcaatgcgtgaagtattcatacagctctttagccgcgTTGTCTTgtatgtg  
cgttttaggctaactaacgactgcactgcgtttggcgtaatgcgagaagtattcatgcaatctagtaggcgtaatgcgttcacgcccgaacctca  
ctgtttggcgcaatgcgtgaagtattctccagccttgaggcgccaatatgccttgcgaccgcttctccgcggaatccgctcacttatcggaatgc  
gtacgtagttacatgggtgcaaaatcgatccggataatccagagtctactgtat

>MITE\_T\_7138

tcgacggtgaaattaccaaacacgtatctcgtttgctgtgtttaaatactacgctcacattttttttgaaatagaccaaataaatatcattccttg  
aaattttcacagaatttttctgcacgaagaggaaaaatcacagaaattctcaagactagacattaagtagttttcatttaaaaaataaagtatgaca  
ggaaagtctgcgacgtcgaaaccgagatacgtgggttgtagtttcaccatcgatatatcgacgggtgtaagctggcaatcacataactcgtttccg  
gtgtctgaaaaatctccgcctctgtgtatttttttaaaggagaacaaattgacatcattccttgaagtttttgagaatttacttcgcacagagaagaaa

aatcatagcagttttaagaattgctgttgagtagtttccgtttaaaaaatgaagtatgacaggaagtctgtgacgcgacgtcgcaaacccgagcta  
tatgattgccgactcacaccgtcga

>MITE\_T\_7147

TCAACAGCGTAAGccccgaatcacatatcgtcaccttcaggcaaaagtatcacaagcgccatgacgacgtttaaaaaattccgccgcc  
attatattttttacagagaaattgtcaacgaagctgtccaaaaattacaccgaattttcttgtgctgccgattaaatttagtgaaatttcgaaacgaa  
ttaaccaacaattttctagtaaaaaataaaatggcgggcggaatttttaaacgtcgcacatggcgcttgatactttgcctgggaaggtgacgat  
cttgTTTACttacagtgctgaaaatctctgcctctatgttatttttaaaaggagaacaaattgacattattctgcagtttatgcagaattttctca  
cacagagtagaaaaatcacagcaattttaagaaatgctgttgagtagtttctgtttaaaaaataaagtatgacaggaagcttgcgacgtcgcaaa  
ccgagttatgtgattgccgacttctACTGTGGA

>MITE\_T\_7150

ccctgctaaaaatgacgagcaggctattcagaattcgccgactTACATGAGTAGAACTTACTACTTATATGAGTAG  
GaatcctactcatatcactagagtatttactcataagagtagaaaagttcaactcatatgaattcaatttttcattttcagaagtctgtTTTG  
GCCAGGAGACACCGTCAACACCGACATAAtgtgcaaatgtgaaaaataagaacattttgtccTTATAATTTTT  
TAGATGCGGTGgattagttctgagatcgcgacatggttagattcaacgctgaactcacgTGAGTTGagatcttagtcatatgagtt  
ggaatctctagtcatatgagtcgccgaaaagtgaatagagaaattctgctcaaatgagttaaattctattcatataagttgaaattctattcacatgag  
tgaaattctattcatatgaattgaaattctattcatcgcACTTTGATTGTCTATTCACTTGTACTCACTATTTTTAGC  
AGAG

>MITE\_T\_7222

tcgacggcgtaagtcgcaatcacatatcgacggtgaaagtcggcaatcacataactcggtttgcgacgtcgtagacttactgtcatacctacttta  
tttttaaacggaaaattactcaacggcaattctttaaaactgccatgaattttcttctgtgcaagaaaattctgaaaaactcaagaaatgatgtc  
aatttgttctcttttaaaaaataacatagaggcgagatttcagacaccgcaaacgagttatgtgattgcaaaacttacaccgtcgatatctcgttgt  
agtgtctgaaaatctatgcctctatgtgttttttaaaagaagaacaaattgacatcattcttgaagttaatgcagaattttctgtgcacagagaagaa  
aatcatggcagttttaagaatggccgttgagtagtttccgtttaaaaaataaagtatgacaggaagtctgcgacgtcggaaccgagttatgtg  
actgtgactttcacccgtcga

>MITE\_T\_7361

aatggagatgttgcatgtgtgaggaatttgcgatttggctgttgattaatacgtaaaagttcgcgataaacacgatggtgccactggtttctctgaaa  
ttaactcccaagctcaaaaaagctctcaagttgaggccaaaatggaggggatatcccaccctaccctgagagtcacgtctcatcaagacga  
actctccatgcaaagatagagagcaaatacattagcaggggtgccgtgtttcggtttagagtcctcaataaagtggcagccctgtcaatgtatt  
gtccctatctttgcatagagagtttgtcttgatgtagacgtggactctcaggctcaggatagcgtgggatatcccctccctctgctcaactttgag  
agcttttttgtgcttaggagttgatttttagggaaatccagtggcaccatcggtgttttcgcgaacttttactgaagaatccatagtc aaatcgcaaatc  
ctcacacatgcaacatctccatt

>MITE\_T\_7423

tcgacgggtgaagtcggcatcacataactcggtttgcgacgtcgccgacttctgtcatgctttattttcaagtggaaaactactcaacggcaattct  
ttaaaactgccttaattgtttctctgtgcaagaaaatgatGCAAAGCTTCttggaatgatcaatttgttctccttaaaaaataaca  
cagtgGCGGAGCTTtacagacaccgcaaacgagatatcgacggtgaaactactaaaccacgtatctcggtttgcgacgtcgagacttc  
ctgtcatactttatttttaaatgaaaaactactcaacgtccagtcctgaaaatttctgtgatttttcttctgtcgaggagaaaattctgtgaacatttcaa  
ggaatgatactgatttggctacttcaaaaaataaaatgcgagcgtagatttttaaacaccgcaaacgagatacgtggtttggtagtttcaccgtcg  
atatgtgattgcgaacttacTCCGTCCA

>MITE\_T\_7545

gagtacctttatagacagagtatggcatttctgttccggttttcttggctgcgctgaaaataggctgacacgatgttcttagggCCGtacataaa  
caaacaagatggctgttatcagcaagcaagattgaggttatgcacatcttacatcctctgtgataaagggtgaaaggcgatttaacaatgtttcatg  
tattttctgtgtctattcgtagatatgtagtttaagttgttactgccgcataattgagattttgtgaaatttagcttctatcgatgttaaggtgagccgc  
cattttgtttgttttattacggccctaagagcatcatgaagcctaaaaactcgttgaccaatcaaaaagcggaacagtttctgtagtgaaaagatac  
gaatggccatactctgtctataaagggtactctagctcagaaggggtggctgcacttttgggccctaagccctccatgaaccgatctgtccatactctc  
cctatacaggtactc

>MITE\_T\_7589

gagtacctatattgagagcagagatggaaagtgaatttcacgttttgaaatttcacaaggccgaataaatttcaaaaaattgaaattgttgattt  
tcaaagaaatattgttactaagccttagagtacgtgatagcgagagtatggacagatgtgaaactccgaaaatccatcaggccctcaccgatgctt  
ctgcgaataaagtttagggcccagaatgcagccaacctatgaatttcaattatccagaacgatttactaataactattgttacgaaccgtcgtttattaa  
gcacgcgtgtttgactcagttttgcataaatttactcaatttcgagggaagacgctcatttctgtacattatttgcacatggttagaattggaatctg  
cagactggcagtgaaattttgtgcgttagaagttgggttagaaggggtggctgcacttttgggccctaagccctccatgaacgatctgtccatactct  
cgctatacaggtactc



>MITE\_T\_7592

tttatgctacaaggaacccatgtgcattgtgcatagagtttgcgcgtgtaacgttgcattgggtggaacgatcatgggtgcaacaaacctaaaatctga  
tcatggagtcaacaatcgttgacgtcgtgctcaggcagtaaaacgcaaaaatgggcctgatcatgggtgcaacgatcaggGCGTCAAC  
AAACAAACGAATATCTTCCTTATAAGTAAATCAAAAAGTTACGTGCACAGGAGAGGTC  
TGGGTCACGTACGGTTGGTTAGATTAGATtagaacacaagaaaaaagactgaaagTTGAAAGATGTT  
ATAAGgggaattttaagttttgttgacgtcgtgatcgttgacaccgcgATCATCTTTCAtaagagtcagaattttttattttttggat  
gatcatggagtgcagaaaaacttagaaaaactgtttgttgacgccgtgatcgttgacaccatgctacgtaatccgtgagacatagttccttttggcat  
aaa

>MITE\_T\_7595

cagggtgtcccaaaagtccgtacccccccctcataacttttgacgggttagagatagaaaaacgaaactttgggaatgtctctatcttaaagggga  
ccatctttaggggggttcaaaattttgtcctctCCTCAGGGGGGGCGGTGGCCCCCAACTTCTTTTCAAATG  
Atgacccctatcttgtgatacatcattagaaagagcataaaaaactaagaattttggcgcgaaaccgcagatcaatatcttaacttttgaccgagttat  
gatagatCAAAGGTCAAGTTTGacttttttcaaaaatcataactccggttcaaattatcgtaaagaaagaaatgaaacgggaaaat  
ttacctaATTGTAAGCACTTATaggttaaaaatcacagaaatcacttcaaaactaatttaagggggggttttggacccccaaatacgtcatt  
ttaaagggtcatacgttttccgcgaaatgagccaatttcccttactttgcctcaacattatcttggttaagttcaaaattagttcaacatttcgttttcaa  
gtcccgaatttcgaacaaagttttaaaaaaacgaaatttaaatggttggattgaatcacctaaatgtcgttttttaaaaaaccttgTCGAA  
ATTTNccccccccccctgaagagaggacaaaaattttgacccccctagaagatgggtccccttaagatagagacattcccaaagtctcgtt  
ttctatcttaaccgttcaaaagtacgaggaggtacggacttttgggacaccctg

>MITE\_T\_7680

ATGGAgaagttgcatgtgtgaggaatttgcgatttggctattgattcttacgtaaaagttcgcgagaaacacgatgggtccactgggtgttctctg  
aatcaacttccaagctcaaaaaagctctcaagtcgagaccaaaatggagggggatatcccacgctatcctgagagtcacacctacatcaaga  
caaactctccatgcaaagataggagaaaaatacattagcagggttgccactttattttgggactccaacactgaaaacacggcaaccctgcta  
gtatttgcctcctatccttgcatggagagtttgcctgatatagatgtggcctctcaggatagcgtgggatatcccctccattttggccttaactgaga  
gcttctttgagcttgggagttgatttcagagaaaaccagtggcttcacgtgtttctcgcgaacttttacgtaagaatcaatagccaaatcgcaaatt  
cctcacacatgcaacatctccat

>MITE\_T\_7701

AGTACAAGCAGGTAAATGGGGCCCTGGGATACAGAGGGgctcaggggscggactggtagtcgaaaagttag  
gaggcgacctaagtgtgggggcccctctgtcgttcggggccCCCctaagaaggtccgggggcccctccccggaaaaatttgaaaatttc  
acactttttaaacgcaatttcaagcattattggagttaaaATTCCACAGTtctgtaactcaaaaataaccattctcaggattcctcgGGG  
GCCCCATTTCATCACATAGCTCCaggcgacctttcatgtctcttagagacaaatttcaaggattttggggccttttagtgacagaa  
aaggatcgaaaaattacaacattacgggggaaaaaacgaaaaaattcgccgcggggccattcgggacctccgcggcaaattgttaggag  
gcgatgcctccccgcccccatggccagtccgcccctggagGGGCTGAAAATTATTAAGTGTACCTACTTGTAG  
T

>MITE\_T\_8074

atttttattaattaatatataaataacacggaaaaaacgagcttaggggtgggacctacatgttagtgctgggcactaacgagggttaggtcaaatg  
gagccagcaagtcagaggagtgctgggcactaaacagctcgaggctgggtcactaaggaagaagtagtgtaagccctaaagtgactttgga  
gcgagcgtaaaaatgaaacgcctccgcccggGGAAtgaactcgggttgccgggtggaagaccagcgcggtaccaccaggctatcgtgac  
tccgacgtctcatgggtgaatttacctgttaagcgcaactacgtctcgggcatctgattagcactactcatgttcagtgccacctgtactgcctt  
ccggtgttaagctgtacagcgcttagacgccagccctcaactactccccactaaacggccagtagtgctcaacactagtcgtttttccgtgaat  
atataattaatatataaataata

>MITE\_T\_8171

agggtgaatccaggcttggaaacttcgcgatttggccaccacgtcgcgctgctcagaatagccgtatatatttgccaaaataataaaaaattgtaatactt  
attcaagattggagatccagggtatatagcaacatacttgaggaaactcaggaaaaaaatgttctcaaaattcctaaaaataaagTCTTAA  
CTGCGGCGGAAGgtaattccattgcggcaatgggagagagagaggcagAACACGAGGGATTCCGTTGCGCG  
CTCGGCTGCCgccgctgagctgaaagtgtcagccgtactttctcgcgctgttattctaattgccaatatttttgctcaaaataccaagca  
aaaaataatctatatatttgcggatctgcttttgaatttgaggaatttccagtaatcgtcgaaggaaagtgaattctcagtggtgatTGGTGG  
TGCTATCTCTAATCTTAAATTGTCCCCAGTCAAACCCTGGATTCTCCT

>MITE\_T\_8261

gagtacctttatggaCAGAGtgtggccatttctgttccggttttcattgggtcgcgagcgaattagagtccttttataccagagttaagacaact  
cacttttgggtcggctgaaagtggcctaaaaaaaatccaattctgattgggtctcgtcgtcatggaggccgaaacgagtgaccaagatggcggtta  
cctcgaatgtgaacaagaataatgaaaatatcacctaattgtggttatcaagagtaaattgttattccatcggtccaaatgaaaatagattaagaa  
attattcacaacaaatctcattttcttttaattgatcaattgttgatgttgtgtttgtgtgacagacatcgaggattcctgatccttatccctcaata

tcgttcgtttgggtgcactcgtttcggcctccatggccagccaaggccggctgccagtcagctgataatcgagttgtcttaactctgggtataaagg  
gactc

>MITE\_T\_8321

cactggaaaaaaaaaaaaaaaaacatatcgacggtgaaactaccaaacacgtatcttcggttgcgacgtcgcagacttctgtcatacttcatttt  
ttaatgaaaaactacttaactaCTGTCTACTACTGTGTGTACTactgtcttgaaaattctgtgatttttcttctcgtgcggagaa  
aattctgtgaaaatttcaaagaatgatattgatttggctacttcaaaaaataaaatgcgagcgtagatttttaaacaccgcaaacgagatacgtggt  
ttgggtggatctagagtcagactcttgaacattgacaagaaaaaggactcttgattcaatcagattaaagcgtaaatcaaaaggaaatccgctc  
aaattaagaggcttggttctgatctaagcgaaaatcctattgaatcaagagtatttttctgtcaatgttttaagagtctggactctagatccaatgtg  
ttttttccagtg

>MITE\_T\_8401

gagtccctttataccagagttacgacaactcgattatcagctgactggcagccgtccttggctggccatggaagccgaaacgagtgcacccaa  
acgaacgatattgagggataaggatcaggaatcctgcgatgtctgtcacacaaaaacaacatcaacaaagtgatcaattaaaaataaaatga  
gattggtttgtgaataatttcttaactattttcatttggacctatggaaataacaatttactcttgataaaccacaattaggtaatattttcattattctgtt  
cacattcgaggtagcccatcttgggtgcactagtttcggccttcatgagcgagaaccaatcagaattggatttttttaggccactttcagcccaatc  
ctggcccaaccaaagtgtggtgtcgttaactctgggtgtaaagggactctatgccAGTCAGCtgaatcgagttgtcttaactctgggtataa  
agggactc

>MITE\_T\_8617

tcgacgggtgaagcttttcttcaaatttgccttgaatcgcGCTTTTCCAATCTGCAATAAATATCaacgcacattggcgc  
ctacgagactgcaggaatacttcacgcattgcacaaacacgggtgcggcgccGGCCTGCGCACagggcatattagcgctacaag  
actgcatgaatacttcacgcattgcactaaacacagtggtgctactGTTCTGCGTGAAacggtatatacgacgggtgtagtcggcaatca  
cataactcggtttgcgacgttcgagacttctgtcatactttatttttaaacggaaaactactcaacgacaattcttaaaactgccgtgatttttctt  
ctgtgcaaagataattctgaaaaactcaaggaatgatataatttcttcttcttaaaaaataataaagaggcggagattttcacacaccgcaaac  
gagttatgtgattgccgacttgcaccgtcga

>MITE\_T\_8816

gagtccctttataccagagttaagacaactcgattatcagctgactggtagagtcctttataccagagttaagacaactcgattatcagctgact  
ggcagccggccttggctggccatggaggccgaaacgagtgcacaaaaacgacgatattgagggataaggatcaggaatcctgcgatgtctg  
tcacacaaaaacaacaacatcaacaaattgatcaattaaaaagaaaatgagattggtttgtgaataatttcttaactattttcatttggaccgatgga  
aataacaatttactcttgataaaccacaattaggtgatatttcattattctgttcacattcgaggtaccgccatcttgggtgcactcgttcggcctccat  
aagcgagaaccaatcagaattggatttttttaggccactttcagccgaaccaaagtgtggttcttaactctgggtataaagggactc

>MITE\_T\_8943

tggacgtattttcatcaaacagaactatgagcagaggggaaagatgggggtgtgctcttagtgctcgggccataagaataatgaatgggaaataaa  
agcgcagtgacgaatCCGCCGCTCCAGTTGCTGAGCTTCcccttaactcatgagctctgccacaaggctctagatata  
tgcccacgaCTCATacactgtgcacatagttccatttgacagaaggtgaaatcccgttctccaattcagcaaacggaactgtgagccaacta  
agtgcggcacccatgagccgtgggcatgtatctgGAGCCTTGTTGggcaaggctcatgagttaaagcggaaGCCCGGCAAC  
TGGAGCGGCGGATTTCGTCAAACCTGGCGCTcatatttccattcattcttacggccccgagCACTGCCGAGcac  
gaacgagcacacccccattttacctctacacatagttctgtgtatagaaatacgtcca

>MITE\_T\_8974

ttagagtccctttataccagagttacgacaactcacttttggttgggcccaggattgggctgaaagtggcctaaaaaaaaatccaattctgattggtt  
ctcgtcatggtgcaccaagatggcggtacctcgaatgtgaacaagaataatgaaaatattacctaattgtggtttatcaagagtaaattgtatttcc  
atagggtccaaaatgaaaatagattaagaaattattcacaaccaatctcattttcttttaattgatcactttgttgatgtgtttgtgtgacagacatcg  
caggattcctgatccttatccctcaatatcgttcgtttgggtgcactcgttcggcttccatggccagccaaggacggctgccagtcagctgataatc  
gagttgtcgttaactctgggtataaagggactctactgatTATGGACTCTTTGGTAATAGGTACTTGCCGAAGGGA  
GACTCTAA

>MITE\_T\_9233

aggtgattcgtcaagctcaagtgacgtggcgaactggcatgcaatatatcgcatcgattagggaaaaatctcggcagattttgaatttttagcaaa  
gaaaaggacgatagcccctgcgatgagcctaaagaatcattctaaacccaaaaatttcaaaattcagagaaatgataGCAGAATATT  
GTTTGgagaaaacctcgcattcgattcagctatcgatttctgtaccgaatgcgaggtttttccccaAACACTACTCTGctttaatttct  
ctgaattttgccgaattATGggcttagaatgattctttaggctcttgcgcaggggctatcgtcgtttgtttggctaaaaattcaaaatctgtcgagatt  
tttgacctaaaagatgcgatataatgcacgccagttcgaccacggCACTTGAGCTTGACATGAAATATGAAAGATG  
ACGAGCTTGAGCTtaacgaatcacct

>MITE\_T\_10266

cAGTAGCCGCTCAATAATTCTGAAGTTGGAGGGACCAgggattttctcgaaataacGAGTTTTCTGAAT  
CGGCGAGATTTCAAATTAGGAAGAGCGGTtacgaaaaattcgaaataaagagagtccaAATAAGCTCTA  
TAATTCGAAGTGGTGGAAACCGAACGCTCTATAATTCTGAATAAGATAATCAGTGGATttaatcgt  
aaattcctcagtTCTCCGCCCCGTTAGGCATTGACATATGTATATACATCAAAACAACCACTTCGTG  
ACTTCGAATTATAGAGCGCCCGGCACAGAAATTTCTGAACCTACAGAGCTTTTCACAAGCT  
ATTTTCCAACATAAAAAGTCTGAATTACCGAGGGGGTAAAAATACACTGACTTTTTCTGAAT  
TGACGCGATTTGCCCAAGGGGATCGGCATCGCCGTCGAATTATCGAGCTTTTCAAATTAT  
CAAGCTTCTGAATTATCGAGCGGCTACTG

>MITE\_T\_10318

gagtccctttataccagagttgaagacaactcacttttggtggggccagggtgggctgaaagtggcctaaaaaaaatccaattctgattggttctc  
gctcatggaggccgaaacgagtgacccaagatggcggtaccttgaatgtgaacaagaataatgaaaatattacctaattgtggttatcaagagta  
aattgtcatttccatcggtccaaaatgaaaatagattaagaaattattcacaaccaaactcattttcttttaattgatcaattgttgatgtgtgtgtgtgt  
gtgacagacatcgaggttctgatccttatccctcaatatcggttggttggtgcactcggttcggcctccatggccagccaaggccgggtgcc  
agtcagctgataatcgagttgtcttaactctgggtataaagggactctatctcAACTCTCTCTAGGTATAATGGGACTC

>MITE\_T\_10631

GATCTGTCTGCaggaaaatagtaaaatcaggcattttgtcaaatgcctaggcagatagttaaatttgacgggtctacaaaattttgtgaatttat  
ggcgcagagatcacgagttttcaatatttttaggaaaaataactcatcaaacctacgagcTCTTTTTTGTCAATTCCTCCTctgga  
agaagaggaaaaatccTCTCttgcttttcatatttttaaatgttgaaattcaaaaaaatctgtcttttatgacatgctgcaaatttcaagataagtgct  
tgctcaggagctaaaaattgtttaaaatactattgtgtgatgcaaattttactgagaatttttctcacggGAGCAATTATATATTTTGG  
CTAAAATTATGagaagaatcagaattttatctaagttagaattttgactctTTGCCAGGCATTTACAAAAAAGCC  
TGATTTTACTACTTACCTGCGACAGAtc

>MITE\_T\_10669

CGTATCTGTCTGCAGGACTTGTCTGCATTTGActaaatcaggcattttgttaaaatgcctaggcacaatagtcacaataatcT  
TATTTCTGATTGAAATTCCGATAATTTTGCTAATTTAacacaaaataattattctctcaAGTAGATAAaggaga  
ttttgtaaaaattagatcaacaattgtaataaaattaaatctagTCCTTTAAAAGAGCTCTCATCTCGtgattttcagcatgtc  
atataatacagactttttaaaattctgaaagttaAAATATATGAGGAGCATTCGGAGCGCAAAATACAAGATAA  
GTTGGTAGTTTTGATGCATtattactttcaattttcaaaattataaaaactagATGGTTCCTCGTCAAAAACTCA  
CGAGTCTTggtaaaccatcaaaaatttgactatctgcctgggcatttgatgaaatgcctgatttgactatttgctgcgacatatcca

>MITE\_T\_10686

gagtccctttataccagagttacgacaactcacttttggtggggccagggtgggctgaaagtggcctaaaaaaaatccaattctgattggttctc  
gctcatggaggccgaaacgagtgacccaagatggcggtacctcgtatgtgaacaagaataatgaaaatattacctaattgtggttatcaagagta  
aattgttatttccatcggtccaaaatgaaaatagattaagaaattattcacaaccaaactcattttatttttaattgatcagtttggtgatgtgtgtgtgtgt  
gtgacagacatcgaggttctgatccttatccctcaatatcggttggttggtgcactcggttcgttCGTTTCGTTTCGGACAGC  
CAAagccggctgtcagtcagctgataatcgagttgtcgtaactctgggtataaagggactctaactctgggtataaagggactc

>MITE\_T\_10702

cactgaagaaaaagattggtagaatttaccattttctcacgctgtatttcacacaggcTGTGTGACACAGCGAGAaggaatgataa  
attctaccaatcttcaagtcgattctgccataAGAATGGTCACTTGTACCAgtatatacactggaaaaaaaacacattggatcta  
gagtccagactcttaaaaacatcgggaaaaaaaataactcttgattcgatcggtttttgcttaaatcaagaaccaagcctctaatttgagcggattt  
ccttttgatttaagcaaaaatctcattgaatcaagagtatttttctgtcaatgttttcaagagctggaccctagatccaatgtgtttttattccagtgtag  
taacgtttacctttcttctggcagaattgactctaaattgacgccgagtaataacagcgtgaaggaatggtaaactCTACCATTTTTTTGT  
CAGTG

>MITE\_T\_11112

cctgtatacaggagagtattgccatctcaatccttttgctacagaaaaagtgtaccgctctctgattggtcagctatcatggagctccaaagttggac  
ccaTGTAACAAACCCCCCTCCGCTCCTGGACccatgtaaacaaccccagccccctcgctcctagtttggcccaatgt  
aaacaagcaagatggcggaagttctacaaattctagacgtgattttgggcgtgatagaaattttgttacatccaacttctgaattgagtttagGA  
TCGAACCTTGATGcatatttttccgaaaattaagctttgagtgatattcatttctcagccgaaattacgtgttctctgggtcagG  
TTTGTTTACactggtccaactttggagctccatgatagcctaaccctgacgaaccaatcagagagcgacaCAGAGATGGccata  
ctctcccgtatacagg

>MITE\_T\_11318

gagtacctttacagacagagtagtgctagagtacctatgtatGAGCAGAGTatggctagagtacctatattaagagagtatggccactgg  
gtcccatggagaggcttaggacccaaaaatggcggtgctttgttttagttttgaggatgggaggggggtcattgccaaactttgacggttatcacc  
aaacgcacttgctgccaaccttactacatctaagatcatttttctaaaaattgcacacgattagccttaaaaaatgtaaaaaagtcgtaaatagtga

tttgggtaaagtctcgttacgataagcaaagacaactacattttgaatcattttgcattacattaactttatggcgtccgccatttttgggtcctaaggg  
ctccattcaggctaaaatggctgagccaatcagagggtgtaactccagtggccatactctctcaatatagggtactc

>MITE\_T\_11463

TTCGATAAtatcatggtgtctagaatttaTGACcagggtcattccctgattttccctgatttacaGGAGCTCATTCTCTGAT  
GAGAAACCGTACTTTTCTCCTACTTCCCCGAGATTTTCTAAGGGAAAAGAATATAACTCT  
CCAGAGTTCCATTTATGAATATAGATTTTAATTCCGATAGCGTTCCAGATGTTTATACTACC  
GGGTCAATGAAAGCCtctccattttttaatgatttgaagtttcaaagtgttaaTTCAAGAAGTCAAAAATAGCGC  
TCGatcagattagaccgcaaatttgaacgaaatgatccctaagcggtagaagaagagatttccggttctggaacagattccctgattttc  
cctgattttccctgtaaattttcattccctgatgaatcccgggtttccccgggttttccCGTTCTAAACACCATGGATAATATTCA  
A

>MITE\_T\_11531

gtagcagaacaaattttgtgtttctaaaaaagtataaaaaaatatttgttatccaaatggtagttttatataaaatacgtgaacgcttatataaaa  
aaaaattaaagttcagaCTTGACcgtgaaatgatgaaaatgataaaagctagataaggtattttgtttatagacaatttttttttttttatataa  
cgcattgcatacgaagtgtaaaagtgaacattttcatgtaactattataaaaaaacagctcataatttctgtgagcttttcgcaaattagaagatttta  
tagtatgtttgcgaaaagctcacgaaaattaagtttttttatataatggttacataaaaatgtccactttaacactttttaggtatgcatgcgttatata  
aaaaaaattaactctctgacataatctttatcttttcttctacgggttctgctac

>MITE\_T\_11534

TgcactagagtacattgtacGGGAGAGTAATTGTCATCTCTGTGCTGATCTCTGGTTGGTTtcttcagtttta  
ggctatcatggagcttcaaagttggcccaatgtaaacataCCCGAcacagagggaacacgtattataggctgagaaatgaatgataatcacac  
tcaaaggttaattttcggcaaaaatatccatcaaagttcgatccgaactcaattcagaagtcgATCGTAAACaaatttctatcacatccaaaa  
tcacgtctagaacttcgtagaactttgtcgccattctgtttgtttacatcgggccAAAtataggagcggaggggctgggggtttgttaccattggg  
ccaactttggggctccatgatagccgaccaatcagagagcggcgccacttttctgtagtaaaaggattgagaaggcaataactctcccgatacag  
ggaCTCTAGTCCG

>MITE\_T\_11875

tatatacagggttatccaaaaggcactgaccaccctgtaactttttccaaattgagatagaagtttgaaactttgggaatgttctcgggtctaaggt  
agcaacttttggttcccccaaaattttgggggcccgcTCTtccctaagggggcggggggctaacttttttttcaaataccaaccccccttgt  
gatacctcattcgaaagataataaaaaaagaaaatttttggcgcaaaccgagggtcaaagtgtgattttgacaaaatggaggcggggtcaaagtt  
caaatggcggaattttggcatctccgtttttatcgcgcgatttggtctgaaactcagaatcctagggtttttgggacgagaaaaacgattctggca  
tcggttttcagaaaaagtcagtcctttcaaatggcgcggtcaaatggcgcgctagagcgagaagtggatatattaggctgcttatcgttgatt  
tgcatgaaacttggtatccgagggtatttcggcacgagaagcacgaatcttcatggatatctgaaattccgacgaatttcaaatggcgcgga  
aaagtGGCGAGAgtcagttttacggctgttaacgaatggatttgcatgaaatgcgATATTGATTATTAGTATTTTAAG  
AATTGATGAAAGATttttatccagccaaaaccaccaggatcatgaaattcatttctTTAAAggacttttgata  
accctgtatatga

>MITE\_T\_11975

GAATCTGTCACAGGCAATCAGTAAAACataaggcattttatcaaatagcTAGGCAGATagccaaattttgaaagt  
taacggaattttgaaatttatagCGAAGAGCTCACCAATTTTCGACGATATTTTCgggaaaataactcatcaaatcta  
cgaactCCCCTTGTTCTTTTCTTTTACATGATGCTCATATATTTgaatagtaaaattttaaaaatttctgtattttat  
gatatGCTGGATATTTCAAGATAAATATTCTTTTCAGGAGCTAAAAACCGTGCAAAAGACTAT  
TGTAATAATACACacttttacagagaattcttacTTACAGGagacatgaaatattttgcctaaaattctgatgagaataaaaatttcaa  
tctgaGTGAGAgattttgactatctgcctaggcatttgacaaaatgcctgattttaccatttgctgcgacaaatC

>MITE\_T\_11980

GCTGCGTTGCTAAACTCTCCGGAGGATTGGGAGCGGAGAGTCTCGGAGAATTACCCGG  
AGGATTGACGTCATCTCTCCAGTCTCTCCGTGTTGTTGGGTCCGCCATGGTCCGCCGGAT  
TCTGTTTTGTTTACACTTCAATTTTAGGTTAAGTTTCTATATTCccaaagttaaaaatgaaatccacAAA  
CACTTTTATctttaaatgtttgaaaattctaaaactcattGCATAAGCAGAAAAAAAGGGCGGAGAATGGTA  
AACGCCTATATTCTTACATCAGTCTACGTATTGGTCTCCAGCTCTTAGACCTCTCGAGGTT  
GGAGAGCTGGACAGCAACTTGGAGACTGACATAGCATGACGTAGCAAGTCTCCGGGTA  
ATTCCTCCAGAGTCAGAACACGGTTGTTTACGTCTCCGGGTAACCTCCAGAGAGCTCTC  
CGGAGACTTTAGCAACGCAGC

>MITE\_T\_12142

cactgaaaaaatgagtttagcgtcagatgactaaaaatggtttctatacactaaactcaaattgtgtgatttgacacacatgattttggtttctgtaca  
ctaaccactattagtgtggaactaatccgctactctaattcgattcggttaggggtgggttaacctaactcaaaactgagagaggagaaaaac

ggcttagcgaatgataactggacaatactttcagNNNNNNNNNNNNNNNNNNNNNNNNNNNNgggtgaatttgtcttaccacagcg  
ctaattttacagctagtgctgttttccaattctgggtcgcgctctagtaaagtcaagtcagcgatgaagcgaattgattgggtgcttcagtacaataaat  
tagttctgaagcctaattttgattctacttggcgagaaccaaccaaattagttctcaacgctaactactttttttcagtg

>MITE\_T\_12393

TATATGTCGCAGACAAATAGTAAAAtcgggcattttgtcaaatgcctgggcaaatagtcaaatattctagctaagattgaaat  
tctgattcttttctaatttttaggcAAAATAATCAAGTGACCCCGTaataaaaaattctcagtaaaaaattgcatcacaaaatagtat  
tttgaacgatttttagcCCCTGAGTAGAtaattatcttgaaattttcagcatttcaagaatacagcatttttagaatgtcaaaatttgaaaatat  
gagaagcaatttaagagcaggaagagacaaaaagagttttaggttgatgagatattttccacaaatattgaaaacttgAGCTCTCC  
GCcataattcacaaaattttgtaggcaatcaaaattagctatctgcctaggcatttgacaaaatgtctgatttcactatttgctgcgacataca

>MITE\_T\_12429

gagtacctatatacaGGAGAGTAtggccatctcaatccttttactacagaacaAGTGTGCCGCTCtatgattggtcggctatcatg  
gagcccctaAGTTGGACCAATATAAACAAATCCCAGCCCCCCCCACTCCTATTTTGGCCCAATG  
CAAGTAAACAATACGGCGACAAAGCTCTAaaaaagtctagacgtgattttggatgtgtagacatttttatgatcaacttc  
tgaattgagttcggattgacctttaatggaatttttgcggaaaattaagctttgagtgattatcattcattttcctaacCGATAATACGTGC  
TGTACATTTACATTtggggtcgggtttgtttacattgggtccaactcaTGAGCTCCATGATAacttaaaactgatgaaccaat  
catactgcggcacagagatggcaataactctcccgtatacaggtactc

>MITE\_T\_12712

ccttaaggtgattcgatggacgcctATTCCGTGTCAgaacggcgtgcgatatatcgcatcaattgggtccatttttcagctactcgtcat  
ttttctgaattttgagatcgcaattctgtgtcaggagactaaaacactcacctaccaattttaacaaagaaattcaacgtaataaaggcatggttttt  
cagagagaaaacatcgattcgatactgatatcggaactgcactcgaatgttatattttctctctaaaaaaccacgcctttattacgtcgaattcctttg  
ttaaaattcgtaagttagtgcttttagtctcctgacaacagaattgcgatctcaaaattggagaaaaatgacgagtagctgaaaaaatggaaccaatt  
gatgcgatatatcgcatgccgttctgacacaaaatatggcgcccATCGAATCATCTCAAGTG

>MITE\_T\_13125

agggtgattcgatggacgctacaatttgtgtcagaacgacatgcgatatatccatcgattgggtccaatttttcagatacttgattttttctgaatttg  
agatcgcaattctttgtctggagactaaagaattcacttaccattatggcaaaaaaaatcaactaataaaaagcgtgggttttttagaggaaaaata  
tcgtactcgatgagtttcgatatcagatcgcaatgcgatattttctctaaaaagaaCCACGCCTTCACTAGATACGTTGA  
ATTgattgtcaaaattggtatgtGAGTTCTTTAGTCTTCTCTGACAACAgagttgcgatctcaaaattccagaaaaagt  
aacgagtagctgaaaaaatggaaccaatcgatgcgatgtatcgatgtcgtctgacacaaaatatggcgtccatcgatcacct

>MITE\_T\_13330

acttaaggtgattcgacggacgccatttttgtgtcagagcgacgtgccatatatcgcatcaattcgttcataatttcagctataattgtcatttgttc  
aaattttgagatcgcaattctgttatcatgagactgaagaactTTGTACCTtggcaaaaaaattcaacgtaataaaggcgtagttttttaga  
ggaaaaatatcgattcgatactgatatgaaactgcactcgaatgcgatattttctctgaaaaaaaaccacgcctttatcacgttgaaattctttgc  
caaatttggtacatggattctttgactcatgaaaacagaagtgcgatctcaaaattcaaaaaaatgacaagtaactgaaattatggaacgaatcga  
tgcgatgaatgcacgtcgtctgacacaaaaaatggcgtccgtcgaatcacatAAT

>MITE\_T\_13404

cacggaaaaaacgagcttaggggttgggacctacatgttagtgctgggcactaacgagggttagatcaaatggagccagcaagtcagaggagt  
gctgggcactaaacagctcgaggctgggtcactaaggaagaagtagtgtcaagccctaaagtactttggagcgagcgtaaaatatgaaatgc  
ctcggcctgggatcgaactcgggtcgcgcgggtggaagaccagcgcgggtaccaccagggtatcgagGCTCGGACGTCTcgaggg  
tgaatttacacctgttaagcgcaactacgtctcctggcatctgattagcactactcatgttcagtgcccacctgtactgccttccggcgtTGAGC  
TGTAcatacagcgcttagacgccagccctcaactactccccactaaacggccagtagctgctaacactagcttgtttttccgtg

>MITE\_T\_13495

gagtccctttataccagagtttaagacatctcgattatcagctggccatggaggcacaaaagagtgactcaaacgaacgatattgagggataag  
gataaggaatcctgcgatgtctgtcatccaaaacattaacatcaacaaaactgatcaaaacctaaccGAAGAAactgaagaaaataaaa  
tttgattgattaGTGGATGATttattaatctattttcattttgggtgcgatgaaaataacaattcactcttgataatCACAAATTTAGTTA  
Taatttcattacttttgttcacattcgaggtaccgccaccttgggtgcactcgtttgtgactccacgagcgagaaccaatcagaattgggtttttttttt  
ttgggccactttcagcccaaccagagcccaacaaaaagtgcgatgtcgttaactctgggtataaagggtactc

>MITE\_T\_13512

agggtgattcgatggacttatggacgccatattttgtgtcagaacggcatgcgatatatcgcatcaattgggtccatttttcagcatctcgtcattttctc  
caattttgagatcgcaattctgtttaggagactaaagcactcactcacaaattttaacgaagaaattcaacgtaataaaggcgtgggtttttcagag  
agaaaaatatcgattcgatgttagtttcgataccagtatcgaatgcgatatttttctctaaaaaaaaccacgcctttattacgttgaaattgtttgtaaaa  
attggcgaagtgcgttttagtctcctgacaacagaattgcgatctcaaaattggaggaaaatgacgagtagctgaaaaaatggaaccaattgatg  
cgatgtatcgcatgccgttctgacacataatatggcgtccatcgatcacct

>MITE\_T\_13528

tatgtcgcaggcaaatagtaaaatcaggcattttgtcaaatgccaggcaataatcaaataaattaacttagattgaatTTTTattctttcctaatttta  
gacaaaatatgtGATTGCTCCCGTAAGAAAAAATGATCGGTAAAAATTTGCGTCTtacaaaaagtatttta  
aatgatttttagctcctgagcgGACACTTATCTGGAAATTTGCAGGATGtcataaaaaacagaaattttagaatttcaacggt  
taaaaatatgagaagctaTCGGAGAGGCatagacaaaaagagttcgtaggttgatgagttatttttcttaaatattgaaaactcgtag  
atctccgccataaattcacaaaatttttagaccttcaaaatttaaccaactgcctaggcatttgataaaatgcctgatttcactatttgctgcgacac  
a

>MITE\_T\_13588

GGGATCTAGAAGCGAAGTGGGTATTACATCCCCCTTTTAtggcagaaaacaatggaatcTCCCAGC  
CAGCCGGTGAGAGTCTCGGATTGTGGACTAGTCGCAACGAAGCGCGAAATGGACTAGT  
CCCATCGCGCAGAGCATGATGGGAGAATATGAATCTCGTACAGTCGAAGAAACAATACG  
TTTTCCCGCCATTTGAGGTCCTCACTCCCAGCTCGATTATTTCAACgaggaaaattaattttagaTG  
AAAGTTTTAGAACAAATACTTTATCACGCTGTTAATACATTTTCATCCATAAGGACTTTTCT  
ATTCTACTCTCACTAAGAGAACTTGTGCGcagaaaaacgggattttcCAATAAGAATACGTACCGA  
GTTAAATTCCCGGTACGTACGACTTGTCTACGGCTATATTGTGCGAGTATCCATTTTGCTT  
CTAGATCCC

>MITE\_T\_13596

gagtacctttatagacagagtatggccattcgtatcttttaccagaggaaaaactgttccgcttttgattgggtcaacgagtttttaggcttaatgatgct  
cttacggccgtaaataaacaacaagatggcggtcaccatAACATCgctaagaagctaaatttgacaaaaatttcaattatacggcagttac  
aatttaaactagcatatctacgaataacacagaaaaacattgttaaactcgctttcacctttatcacaggagagAGGAgaatgtaagatgtgcat  
aacctcaatcttgctgctgataacagccatcttggttattttacggccgtaagaacatcggtgcagcctattttcacgcgaccaatgaaaaacca  
gAACAGAAATGGTCTGTCTATACTGTCTATACTgtccatactctgtctataaaggctactc

>MITE\_T\_13741

TGTGTTGCAGGCCAAAcggtcaaatcaggcattttgttaaatgcctagggaaatagttaaatattcttatttgactgaaattctgattatt  
ttgctgaCTGTAGACGAAATACTTCTCTGATATTAAGGAAAAGAATTCCTGTAAAAACTTGT  
TCCATTTCGATcataaatatgtttttctaGTCTTTTCATGccaatttatctcaaaatatgcagcatttcgtaaaataaaagggtttcaca  
atttgacggatgaagaattatgaggagcatttttgatggaaataaaATGACAATTTGTACTTCAATGgatttttgtctcaaat  
attgaaattagagaagtCTTTGTGAAAACGTAAAAAACCTCGTAAActctaaaaatttaagtatCTGCCTAAG  
CATTTGATAGAATGCCTAacttgactatttgctgcgacata

>MITE\_T\_14038

gagtacctgtatacaggAGAGCATttcatctcaatcctttacaacagaaaaagtgtgctgcTCTCTAATTGGTCAactatcatg  
gagcccaaaagtggaccactgtaaacaaacccagcccttcgctcctagtttggcccaatgtaaacgaACAAGATGGCGAAAA  
AGTTCCACAAATTTCTAGACAAgattttgggtgtgatagaaATGTTTTAATaccgaacttctgaattgagttcggtatcg  
taCTCCGATGGATCTTTTGCccaaaattaacctttgagtggtattatcagtCATTCTCAGTCGATAATACacgttct  
ctgggtcgggtttgttacagcGGACCAACTTGGGAgttccatgatagcctaaaactgatgaaccaatcagagagcggcacagaga  
tggcaatactctcctgtatgtaggtactc

>MITE\_T\_14044

aggtgattcgatggacgggatattttgtgtcagaacggcatgcgatatacgcataatgggtccatttttcagtggtcgtcatttttctccaatttga  
gatcgcgattctattgtcaggagactaaagcactcacttaccaattttaacaaagaaattcaacgtactaaaggcgtgggttttttagagagaaaa  
tcgcattcgatactgatatcgaaactgcactcgaatgcgatattttctctcaaaaaaaaccacgcctttattacgttgaatttcttgttaaaattggta  
agcgagtgctttagtctcctgacaacagaattgcgatctcaaaattggaggggaatgacgagtagctgaaaaaatggaaccaatgaatgcgatata  
tcgcgatgcctttctgacactaaatatggcgtccatcaaatctccT

>MITE\_T\_14051

aggtgattcgatggacgccatattttgtgtcagaacggcatgcgatagatcgcatcaatgggttctattttctcagctactcgtcatttttctccaatttga  
agatcgcaattctgttgcgggagactaaagcactcacttaccaattttaaccaagaaattcaacgtaataaaggcgtgggtttattcagagagaaaa  
catcgattcgatactgatatcgaaactgcacttgattgcgatgttttctctgaaaaaaaccacgcctttattacgttgaatttcttgttaaaattggta  
agtgagtgcttttagtctcctgacaacagaattgcgatctcaaaattggagaaaaatgacgagtagctgaataatggaaccaatgatgcgatata  
cgcgatgccgttctgacacaaaatatggcgtccatcaatcacct

>MITE\_T\_14318

GAGTGCCtttgagtacctttatagacagagtatggctatttctgtgccggtttttcattgggtcgcgagaaaaTAGGTTGACTGTtatt  
cttacggccgtaaataaacaacaaactggctgttatcagcaagcaagAGGTCATGCGCATCTtgcacctcctgtgataaaggc  
gaaaggcgattcaacagtgttttcatgtgttttcatgtgttatttgTAAACAAGTATGCTAGCtaaaattgttactgccgtataactgaa

atTTTTgtcaaatTTtagcttcttatcaatgttacggcggtcgccatcttgtttgtttatttatggccgtaagagcatcatgaagcctaaaaactcgttga  
ccaatcaaaaagcggcacagtttctgtagctAAAAGATACGAATGTCCATTCTCTGtccataaaggctactc  
>MITE\_T\_14449  
GAGtgcctttatagacagagtatgaccattcgtatcttttactacagaaaaactgTGCCTCTTTTTGATTGGTCgccgagtttta  
ggcttcatgctCTTACAGCCGTgaacaaacaagaaaaatgaacaaacaagatggcgactaccgtaacattgataaaaagctaaaattt  
gaaaaacatttcaattacacagcagtaacaatttaaactagcatatctacgaacaACGCATGAAAAACACATGAGAACACt  
attaaatcgcttttcgctttatcataggaggatgaagatgtgcataacctcaaaacttgcttgataacagccatctgtttgtttatttacggccgt  
caGAACATCGTTTCAGCCTATTTTCatgcgaccaatgaaaaactggcacagaaatggccatactctgtctataaaggctactc  
>MITE\_T\_14475  
tgtcacaggcaaatagtaaaatcaggcatttcgtcaaatgcctaggcatatagtc aaatattctgacAAAAACATTTTCAGATTCTT  
CTCCTAATTACAGATGGAAAAATCCATTACGCTTGAAAGAATGAATTCTGTGCAAAAATG  
TGCATCACACAAAagtatTTTgaacgatttttagctcctgaacggACATTCATCTTGAAATCCGCAGCATGTct  
caaaatacaaaatttttaaaatttttaaaactaaaaatacaTTTAAAGCATTTGTagaggaagagagaagaagaattCATAGATCT  
GTTGAGTTATAtctcccaaatattgaaaattcgtgaattcTTCGCCAtagtttacaaaatttcataattcgtcaaaatttgattttgc  
cgAGGCATTTTACGAAATGCCTCATTGACTAATTGCCGGCGACa  
>MITE\_T\_14573  
gGTATGCTGATAGAGGTAAGTGAGAGAGGACTTACACatacctagagtacatatagcgagagtatggacag  
atcgcttcatggagagcttagggcccaaaagtgcagccacccttctaaccaacttatAACGCACAacatttcactgccagtctgttcattcc  
aattctaacgaagatggctagctaagaaagtacataaatgagcgttccccacaaaaatgagtaaatttatgcaaaaactaagtcaaatcgtgctt  
tataaacgatggttcgttaacaattgtattaataaatcgctctggataattgaaatccataggttggtgcatttctgggccctaactttattcgcggagg  
catcggtgaagccctgatggattttcggagttcacatctgtctatactctcgctatacaggtactctacacaTACC  
>MITE\_T\_14622  
attgggtcagttgcgctgggtcaatgaatcgtgtttcgtatgattgattcttgttgatcggtcaaaaaattataagatctgtccaaacggtaactttctacgtt  
caaaattaaacgagatatcgccctttgaaaagtcgggtttctgacgtcatccaccgcgaggagTGACGCCCTTGTTgttccaccttg  
ctttcatctgagTTTCGCGTTGAACAActagtgc aaatgtgcgtcacaccggctgatgaagtaaggtggaagaaaccaagggcg  
tactaccgcggtgatgacgtcaaaaacccgacttttcaaagggtgatatctcggttaattgaacgtagaaagttgcggtttgacggatctta  
ttatttagataatctacaaggatcaaggaacaaaacacgattctttgaccagcgcaactgacccat  
>MITE\_T\_14627  
aggtgatttgatgggtgccatttttgtgtcagagcaacgtgcgatatatcgcatcaattcgttcataatttcagctacttgcatttttatcgaattttga  
gatcgacttctgtgtcatgagactaaagaattcatgtaccaagaCAAAGAAAtccaacgtattaaaggcaggggctttcagaggaaaa  
atttagcattcgagtgcagtttcgatgtcagtatcgaatgcgatattttctctaaaaaacctgcctttatttgTTGAATTCCTCTGTC  
GAATTTGGTACTTGAATTTGTTAATCtgcatacacaagaagtgccatctcaaaattcaaaaaaatgacaagtagctg  
aaattatggaacgaattgatgcgatgtatcgacgtcactctgacacaaaaaaaggcAACCGTCTAATCACCT  
>MITE\_T\_14638  
gagtacatatattgagagagtatggccactgggtcccatggagaggcttaggacccaaaaatggcgctgctttgttttggttttgcggtatgggag  
gggggttattgccaacttttgacggataTCACCAACCACACtgcgtccaaccttactacatccaagataattttctcga aaattgcac  
acgattagccttaaaaatttgaacgaggtcgcaatagtgcattttggtaaatttctcggtacgataagcaaaagacaactacattttgagtcattttgca  
ttacattaacttatggcgctccgccattttgggtcctaagagctccattcagcctaagatggctgagccaatcagaggtggttaactcaagtggccat  
actctctttctataggtactctaccagtggccatactctctcaatataggctactc  
>MITE\_T\_14647  
CAgcctaaggccttgtctccacgggcccgtttcacgagattgtcccaggga aaatcccacttacaaagtgggaaaaatattgagttaatcaat  
atTTTcctagtaccaagtatggctcctgtacacctaggaccactgagagaggaagaagaagtga aaagggaattgtgcgatattttgttgattactc  
tatttttcatgtttgtcagttaaaataacgtgtctaattgtcaattgagtgaattattattttaatcccgggtacatactcgactttatctaatttatctttccg  
cgcaaaactagtcccaggaccgtatgagcctcgctcccggtggagacggtaactgggaaaaatcccagaagtttcatttctgcgattcgaacttgaga  
caaatcccatgaaaacgtctcGTGGAGACAAGTCCTTAAGGCG  
>MITE\_T\_15422  
tatgttgaggcaattagcaatcgccggaaaaattgcaatctattcgtgttgatcaacaaattaaaaaagtttaaagtga aaaaacgagataggA  
AGTagtgattattatgctttgaattcaaaaataCCTTATCCCCtcttcttgatgcattgtACACGCCATGCACGCCAAC  
ACGCGAGTTCGTGAATTGTAATAAATAATCCGcgttgggttggttggttaagGAACTAAACCAACTC  
CTTGccaaagcggagagtatcgctgatttgaaggcgttccaagctgaGTTGTGCCTTGAATTTCTTCGCTTTCT  
TTGCTTTCTTCGCTTTCTTCGCTTTACTGTATCGATGTCGtaattgaaatttgacgaattgacaagtacggagct  
tgcaaaattgccggcaattgctgactgcctgcgacaca

>MITE\_T\_15451

tttgacgtatttctacaaacagacctacgtGGAGGtcagaaatatgggggtgctcgtagttctctttgcgtaagagtgaatgagaataata  
aagcgccagtgacgtcagcggtaacgAAGCCGCTCGCCTCCGCCGCCCCCGTCCATCCGCCTCCGCCG  
CCCCCGTCCATCCGCCTCCGCCGCCCCCGTCCATCCGCCTCCgcataaactcatgagccctgtccacaag  
gctctcttgccatgcccgcggctcgtgagttccgcattcagttggcacataggtctgtttggtagaatgtaaaatcccgtttgccattcttcaaaa  
ggaatcacgcccacttttacattgtttcttatgcagcttcgacgagcacaccccatatttctcacctccacatagggtctgtttggtagaaatacgtcca  
aa

>MITE\_T\_15479

TCAGGGTGGTTTCacaataactggaatagttcgtcgccgtaacagacaacacatttttcgggtcatatttttagaagaaatgataATCA  
CCCGAAGTTTTTCGCATCAGTCTTCAAAGGGCTGCGTATTCTAACGCTTTCTAATTATccatt  
gctctacttctcaattaatattatgtaaattccgaaaacgtgctgtctgttacgcggtaaaaattCAGCGTAACAGTCAACTAATT  
TTCAGCCATTTATatgtttaaattgaaaagtagagcgattaatctttgaaaacgcgttataacacgtaaccctgtgcagattaatgcaaa  
aatattcgagtgattatcattactacaagtaataaaaaatgatgaccgaaaaatgtgtgtctgttacggcgacaaaattaTTCCAAGAATCG  
TGAAACCACCGA

>MITE\_T\_15663

atgggtggtttcacgataactggaatagttatgtcgccgtaacagacaacacatttttcgggtcatatttttagaataatgataatcactcgaattttt  
gttcatctacacagggttacgtgttataacgctctCCAACGATTAATCGCtccacttttcaattttaataataaaatggccgaaaatgtgct  
gtctgttacgctgacttttaccgcgtaacagcgtaacagacagcacattttcggaatttacatgaTATtcattgagaagtagagcaataaatcatt  
agaaaacgTTATAATATGTAACCTTTGacaattaaagcaaaaaattcgagtgattatcatttctactaaaaataataaccgaaaaat  
gtgttcctgtcacggcgacaaaactaatccagttatcgtgaaccacccat

>MITE\_T\_15779

gggatggtcgaatatttagataatcgaatattcgatattcgaatTATTGGCACTgagataatcgcatcacattcgaATATTTGCTTT  
TGAAGTATTCAAATCGCAAGATCCGAAAGTTCTATTAATCAAATTCGAATTCGAAAACC  
GTCCATCCCTATCGTCAATCTCATTATTAATTAATAAACTCGTCCACAACCTTCACACGAGAAT  
GACTGACCATCTTAGTTAAAAGTGTCATTGATCTCTATTAATAACCGTACCATGTTCCATgg  
ttcaaaaaaaaaataaaaaatcgaagcaataatcgaaaatattcgaatattcgcttcaaAGTATTTCGAAATCGCAAGATTTGA  
ATACTTGAATAATCGCAATAGAAAAGTTTCtaatattcgaataatcgcatcgaattcAATATTTCGTCCATC  
CC

>MITE\_T\_15840

tGGGTgttttcacgataactggaatagttttgttgccgtaacagacagcacattttccgGTCAAATTTTCAGTAGAAATGAT  
AACCACCTCTAAgttttcgcattaatcttcacaGGGGTACGTATTATAAcgatttctaattgattattgctgtacttctcaattaat  
attatgtaaattccgaaaatgtgctgtctgttacacggagaaaattcagcgtgacagacagcacattttcgccattataaattagaattgaaaagt  
aaagcgataaatctttgaaaagcgtaaaAGACGTAAACCTgagtagaataatgcaaaacaattctagtgattatcattacctactactaa  
aatatgaccgaaaaatgtgtgtctgttacggcgacaaaactattccagttatcgtgaaccacca

>MITE\_T\_16462

agagcccatttatgcacgcGATTTTTGTGCGCCGGCAACAACAATCGCGCGATTTCAAACTACACG  
GGAAGCTATGGAGCCGTTTTTGTGCGACGACAGCAAATTGCGGCGGGCAAACTGCCGGG  
GCGATTCTAGATCATGTGCTTGTAGTTAGAAACCGCCCGCGATTTCCTGCCGCCCCG  
GGTTTGTAACCTACACGGAGTCATATGAGCGCATTATGCGCGACAAGTTTCGGCGATCGC  
CGCTTGGAATTGAACTTCTCGAGCACGTGTTTTGGACCTTTTGTGCTCCAGAAGAACGG  
TGTCGCGGCGGCAGGAAAAACGTGCCGCGGCGACAAAAATATGGATCGCGCGATTAAA  
AAAAACGTACACGGCGACAACCTGCCGCGGCGACACGAATCgcgtgcataaatgggctct

>MITE\_T\_16572

TAGCTATCGcgggcaaatagtgaaatcaggcattttgtcaaatacctaggctgaTAATCAAATTctgacgggtctacaaaattgtgt  
gaatgtatggcgaagagctcacgatttttactatttttgaaaaataactcatcaaacctacgaactcttttggtctcttctcttaattgcttctcatat  
tttaaatgttgaaattccatcagttctgtattttacgacatgctgacaatttcaagatcagtgctcttcaggagctaaaaattgttgaaaatactattgt  
gtgtgcaaatttttactgagaatttttcttgaggagcaacgaattattttgtctgaaatcaggaaaagaacagaatttcaatctaagttagaacaag  
ttggattttgcaatcgtagcgatagcaa

>MITE\_T\_16757

cactgaaaacaaaatctcgggtgtatttactaagaaaagggtaaaattaccaagaattcagggttctatttgatcccagtttttcttggtaaaattacca  
tttatggaattggtaattttaccgagaaatctcggtaaaattattgattttctcggttaattttactggaccttggtaaatacgccaattttttatcgactg  
tggtagaattgccgagataaaatagcaaagttaccgggaattgattaccagtaaaagtgggtattcttacctgaaaaaaaaacaataaaaataccag



tttttaggtaagcttaacagtctatcttggttaaagttaccaataattggtaaaaaatgtgagatggtaaaggtaccaacggaccttggtaaaaacgcc  
gagaatttttttttcagtg  
>MITE\_T\_16763  
gctgtcgcaggcaaatagtgaaatcaggcattttgtcaaagcctaggcagatagctAAATGCTGattgtctacaaaattttgcgaattcAT  
CATGACGGAGagttcacgagttttcaatatttggtaaaaaatattcatcaaacatacaaaactcttttgtctcttctcttaaTTGCTTC  
TcatgttttaaatgttgaaattataATAATGCTGTATCTCTGAcatatcgaaaatttcaagataagtgctcatcaggagctaaaaa  
tcgtttataataatattttatgttgcaatttttactgagaatttttttaacagggtCAATTAatgattttgtctaaaattagggaaagagtcagaat  
ttcaatcttagctagaatatttgactatttgcctgcgacatagc  
>MITE\_T\_16831  
cactgaaaaaaaaatctcgggtgattttactaagaaaagggtaaaattgccaagaattcagggttctatttgatcccagctatctattggtaaaattacc  
atttatggaattgggtgattttaccgagacatctcggtaaaattattgaactttctcggtaattttactggaccttggtaaaaacgccaatattttttatcga  
ctgtggtagaatcaccgagataaaaatggcaaaagttaccgggaattgattaccaataaaaagtggtattcttacctgaaaaaaaaacagtaaaaaaac  
cgGTTTcaaggtaagcttaccagtcgtctcggtaaaattaccaataattggtaaaaaaaagtgagatggtaaaggtaccaacggaccttgata  
aaaacgccgagaatttttttagtg  
>MITE\_T\_16866  
GGAATTGTCTGAATATTTAGATAatcgaattttcgattttcaaattATCCGCACCGAGATAATTGCATCACA  
TTCAAATATTCTGTTCCGAAGTattcgaaatcgcaattctAATATTCTGAATAATCACATTCTGAATC  
GATAACCGTCCATCCCTATCGTTAATCTCGTTATTAATTGAAACTCGTCCACAACCTCCACA  
CGGAATGAGTGACCGTGTTAGTTAAAAGTGTCATTTATCTCTCATGgttcatgaaaaatcaaaaatc  
gaaacaataatcgaaaatattcgaatttcacTTCCGAAGTAGGTACTCGCAATCGCACgattcgaattctcaataattgt  
aataatcgattcgaaaagtttcgaatattcgaataatcgattcgaattcgatattcgACCATCCC  
>MITE\_T\_16873  
tcgttAATCGTTATCGTTAccctagcgtaaattattaccttgcgggtgagtaaccatcaccttgcggcaagggtatcggtccatccaccc  
caccgagccctatccgagccctcgccgggtcagttcgtggaacttaacgactgggaataattatgcatggcaACGCTGGAGACGA  
AAATCTTACCCAACacgggggtatttcccgatgcAATGTCGCCTTTTTCAAGCCCTGCGTCTGGATTT  
GGAatctacagtgtgtcatcagggttttaatcccgggtcgtcgagttcctgaactggctcggcgagggctcggaagggtcggagaggatggat  
aggccgataccttgcgcaagggtgatggtagctcaccgcaaggtaattttacgctagggtATCGTTAAAGGATTTAATGA  
>MITE\_T\_16926  
cactgggaaaaaaaaatctcgggtgattttactaagaaaaggataaaaattaccaagaaatcagggttctatttgatcccagtttttcttggtagaattaa  
catttatggaattggtaatttcaccgagaaaatctcggtaaaattattgaactttctcggtaattttaccggaccttggtaaaaacgccaatattttttatc  
actgtggtagaatcaccgagataaaaacggcaaaacttaccgggaatcgattaccaataaaaagtggtattcttacctgagaaaaacagtaaaaaac  
cggtttttaggtaagcttaccagtcgtcttggtaaaattaccaataattgtaaaaaaagtgagatggtaaaggtaacgacggaccttggtaaaaac  
gccgagaatttttttcagtg  
>MITE\_T\_16929  
cactgaaaaaaaaatctcgggtgattttactaagaaaagggtaaaattaccaagaatttagagttctatttgatcccagtttttcttggtaaaattaccat  
ttatggaattggtaattttaccgctaatctcggtaaaattattgaactttctcggtaattttactggaccccggtaaaaacgcaaatattttcatcgaactg  
tggtagaattaccgagataaaaatggcaaaagtaccgggaattgattaccaataaaaagtggtattcttacctggaaaaaacagtaaaaaatcatgttt  
taggtaaagcttaccagtcgtcttggtaaaattaccaataattggtaaaaaaaagtgagatggtaaagggtaccaacggaccttggtaaaaacgc  
cgagaatttttttcagtg  
>MITE\_T\_16939  
cactgaaaaaaaaatctcggcgttttaccaagggtccgttggttacctttaccatctcactttttaccaattattggtaattttaccaagacagactggtaa  
gcttacctaaaaacgggtatttttactgtttttttcaggtaagaataaccactttattggtaataattcccataactttgccattttatctcggtaattct  
accacagtcgataaaaaatattggcgttttaccaagattcagtaaaattaccgagaaaattcaataattttactaagattttcggtaaaattaccaat  
tccataaatgggtattttatcaagaaaaaactgggatcaaatagaaccctgaattcttggtattttacccttttctcagtaaaatacaccgagattttttt  
tcagtg  
>MITE\_T\_17026  
cgctgaaaaaaaaatctcggcgttttccaagggtccgttggttacctttaccatctcacttttttactaattattggtaattttaccaagacagactggta  
agcttacctaaaaacgggtaggtatttttactgttttttcgggTAAGAAGacaactttattggtaataattcccgttaactttgccattttatctc  
ggtaattctaccacagtcgataaaaaatattggcgttttaccgggtccagtaaaattaccgagaaaagtcataattttaccgagattttcggtaaaa  
ttaccaatcccataaatgggtattttaccaagaaaaaactgggatcaaatagaaccctgaattcttggtattttatccttttctagtaaaatacaccgag  
attttttcttcagtg  
>MITE\_T\_17123

TCCAGGatgtctaccagttatgaaaaacaaaattggggacttttgggaaCTTTTAGgggtattttttcaagaaaatcggggacattT  
TTCCCGAACAGTAAGAGAACAGTAAGAACAGAAAGGGAGCTATTGCtatagtttagagcgtaaag  
gtgtattttatacgaactattatacaagtcagttgaaccgatgaaaacatccAAAAAACCAAGCGACGCTTCAGTTTTTA  
TATTCCTGTTTATACGGCGCCgccgaaaattgcaaatgccggtgttaggacgattttgtcatttttgggggcctgaacaaga  
aaattggggactttcgcgatatcggggacactcttcaaaatcgaggataatcggggacattggggacttttggggaccggtagacacctga  
>MITE\_T\_17163

TTTACCAATGTATCCCGAGGCGAgtgcactgaaaacaaattctcggcgttttaccaaggccggttggtaccttcaccatctca  
ctttttaccaattattggttaatttactaagacagactggttaagcttacctaaaaaccggtatttttactgtttttccaggtaagaataccactttattg  
gtaataatcccggttaactttgccattctatctcggttaattctaccacagtcgataaaaaatattggcgttttaccggggatcagtaaaattaccga  
gaaagtcaataattttaccgagattttctcggtaaaaattccaattccataaatggaattttaccaagaaaaaactgggatcaaatagaaccctgaatt  
cttggaattttacccttttcttggtaaa

>MITE\_T\_17226

accattgacttatgatttaatttgacgaaaatcagtaactttgaacacttcaaaaataatccagaaatgcCTTCTTCAAGGGTGAAA  
ATTGACACAAGAAGCATTACAAATacaacgtttgagaaaaatgggtgaaaactttgaacaaaatgattttttattgtggTTT  
ATAGCTATCAAAGTcgcaaaaatcgaaaatcagcgaaaatcagaaaatttgagggtatttcatgttcaaacgcacagtaatatgaaa  
ataccgtAACGAAACAGGAAATTACCGTACACATTAAGTCATAGAGTAGCCACACTACTCttat  
aaaaattgatgagaacGCAATCTACCGGAGAATCGCCGAAATAACGCAAACAATCAGTGGACGG  
CTGGGAGCCGTCATTTTAAGTCAATGGTT

>MITE\_T\_17253

cactgaaaaaaattctcggcgttttaccaaggccggttggtacctttaccatttcactttttttaccaattattggttaattttaccaagatagactggta  
agcttacctattaaccggtatttttactgtttttcaggttaagaataccacttttattggttaataatcccggtatcttgccattttatctcggttattctac  
cacagtcgataaaaaatattggcgttttaccgggggtccagtaaaattaccgagaagggtcaataattttacggagatttcttggtaaaattaccaatt  
ccataaatagtaattttaccaagaaaaaactgggatcaaatagaaccctgaattcttggttaattttacccttttcttagtaataaaaccgaaattttttatc  
agtg

>MITE\_T\_17278

ttctatgctattagtccacgtcacagtcggtatcgattgatcgaactggatccaaacaatcaaacataacctcatCTTGACACCTCCC  
TCCCagaatttcactgtcaaaagCCAAGAAACTGGAGTGGCATAGGAGTGGCCTAAATCATGGTGG  
CCCTCGTGGGTATTTTCACCTTTCTGAAACTGCTTTATCCCGTCAACTTAACAATGCGGG  
AACGTTCCGCGATTAAAAGAGCTGTCTCTAacacaactttttctcaaactgggcgaattatctctgaaattctttagtttc  
atattgaatagtaagggtatgtttgattgtttggatccagttcgatacaatcgataccgactgtgacgtggcactaatagagtCTATAGGTAG  
GGAATTAAGGACATAGAATAGAA

>MITE\_T\_17522

TGtacattagagtacctttatagggagagtatggacaactcaaaaatttgagGCTAGGagtgatcaggtcatgtagctcttaggggtccaaa  
aaggcagccaacccatgaactcgaattatccagtggtcactaattcaactccgagagtaggtgcactgatcaaaaattataaaagcacgtataaa  
actttgattttgcataaattttctcagtttcaaatttagtcctaaagacgcttggttacaatgcgctgttgccctattgattaatctttcaaatgcatagg  
ttggcagcggcacaactcaagtattttcgtttttcacgtgtcgccctTTGGGCTCTAAGAggtacataaatcgagttgtccatgtcc  
atactctccctataaaggtagtattgtgtaa

>MITE\_T\_18405

aaaattggcagtatatgaatatttttcagtGTTTATAGGCACTACACCACGggcgccctggtaaaaattgacgataggagctg  
catttcaaaataccataggagttcttatagccgactaaagaagggtattgaaaatcatatagctggctgtagaaagcggagcaaatcatacagccg  
ggctacaggaagctataaaaaagatacagtcaggctgtagttcctatcgccgggctttacgcTTTATCGCCAAtggtctataaaatgcta  
taagaaattgtgtagaaattcgtgtgctttggaaaccattaagtttgatacggaaactacctaattttacaaaacacacattatattttctttaaaacat  
ttttttttcatcaataaaaaatgagaatagtcgatacagaatgtgcaaacatttcaaaatcatgagttgaaaaacgctgactcccgagattaaatag  
agagcccaacacaaaagcggagcggcgacgcactggcgccctcaaacctaacagggatacttcacgcattgcgcaatgcgtgaagtatccctgt  
taggtttgtaggcgccaatgcacgtttcgcactctctgcccgcctttactttatcgtctggtgttgcttactcaccatcggtataaaaggctataa  
gaaattgtacagccggctatagaagctattggaaatcttacgccggcttaggtctatggtattttggaacacagattctactgccaatttt

>MITE\_T\_18423

gagtacctataatatacgggagagtattgccatatctgtgccgctctctgattggttcatcagttttaggctatcatggagctccaaagtggaccaat  
gtaaacaaacccgacccagagaaacacgtattatcggtcgagaaatgaatgataatcacacccgaagcttaattttggcaaaaatatccaggaa  
agttcgatccgaactcaattcagaagttggatataaaCAAaagtctatcacatccaaaatcacgtctagaactttgtagaactttgtcgccatctt  
gtttgttaccattggaccaACTTTGGGGCTTCGTGATATCCaatcaatcagagagcggcacacttttactgtagtaaaaggattg  
agatggcaataactctctgtatacaggtactc

>MITE\_T\_18451

atttgattacattttacaataaggaaccaccatttctggccagtttagaacaataacatgccatttgttcctatgcagtatgcagatatcgacggg  
gaaactaccaaaccacgtatctcggttgcgacgtcgagacttctgtcatactttatttttaaatgaaaaactacttaacatccagtcctgaaaattt  
ctgtgattttcctcttgtgcggagaaaaatccgtgaaaaattcaaggaatgatattgatttgggtctactcaaaaaataaaatgtgagcgtagattt  
taaaccaccgaaacgagatacgtggttggtagttcaccgctgatattgtctttataggaAAATCAGAGATAATGATTCCtcatt  
gcagaatgtaatccaat

>MITE\_T\_18459

cacggagaaaaaaactcgtgcgtgggacccgaagtttaggtcatatgaatctctgaagtttgcattgagcatctgaacactttaggtcaagCT  
GTCgggggttcggatcacacatctgaaacttcagttcttacatctgaagtacttcggtttccacatccgaaaaacttcggttctcacatccgaaaaac  
ttcggttctcacatccgaaaaacttcggttctcacatccgaaaaacttcggtttccacatctgaagtacttcagatgtaagaactgaagttcagatgt  
gtgatccgaacctcgacagctagaccttaagtgtcagatgctcaatctgaaaaacttcagagatccatatgacctaaacttcgggtcccacgcaca  
agggtttttctccgtg

>MITE\_T\_18745

gagtacctttattgagggagtatggccactgggggtaccacctctgattggctcagccatcttaggtgaatggagcccttaggacccaaaaatgg  
cggacgccataaattaatgtaatgcaaatgactcaaatgtagtttcttgcctatcgaacgagaaattactcaaatgcactattgcgacatctt  
acatattttaaggctaactcgtgtgcaattttgagaaaaattatcttagatgtagtaaggttggcagcaaatgcggttgggtgataaccgtcaaaagt  
ggcgtGACCCCCCtgcctccacaaaaacaaaacaaagcaccgcattttgggtcctaagcctctccatggggcccagtgcccata  
ctctctcaatataggtactc

>MITE\_T\_19112

TTTCCTACATAGAAGACTACTGGTcgtccatagagaaaaaaaggaggtgttgcattctgaggattgtacccacctacgt  
catcaatgtaacaagacgctcgttgagggttatgttgacgctgtaaaaacggaccataatgtccgattttttacttaaatcaactcttaatttaattc  
aagcactttttatagaatgacttttcccttaaattacaccatttccaagaaaatcgacaggataaaaacgtcgtgtacccaatgacgtcatcaaag  
ctatagatactctatgaaaaattccaagatgcccgaaatgcaaacacctccttttttctctatgctggTCGTCATTTATCTAAAACT  
TCGGTGACTTTTcttttccatgtagaaa

>MITE\_T\_19245

GAGTAACTTTATAAGgggagtatggacaactcgaatttggagtttaggtttgatcaggtcttGTAGCCCTTGAGCCC  
TTGGGGGCCAagagggcagccaacctatgaactcgaattatccagtggtactaattttctcgtTTTCCACTATTtgcactgatcaa  
aaattataaaagcacgtatgaaactttgatttcgcattaattttctcagtttcaatgtCTTGGTCTTTTAAAACGCTTGCCTagaa  
tgcgctgtcggccctattgattaaGCTCTCAAATGCACAGGTTGGCAGCGGCAATTTTCTCCTGATTTC  
CGTTTTTTCatgttgcgccttttgggccctaagagcttaATAAATAGAGTGTCCATACTCtgcctataaaggtactc

>MITE\_T\_19526

cacggagaaaaaaacctcgtgcgtggaacccgaagttaaggtcatatggatctctgaagtttgcgattgagcatctgaacactttaggtctagct  
gtcgaggttcggatcacacatctgaaacttcagttcttacatctgaagtacttcaaatgtgagaaccgaagttttcggatgtgagaaccgaagtctt  
tcggatgtgaaaaccgaagtacctcagatgtaagaactgaagtccagatgtaagaactgaagtttcagatgtgtgatccgaacctcgacactTC  
GACagtcgacagctagacctaaagtgttcagatgctcaattcgaaaacttcagagatccatatgacctaaacttcgggtcccacgcacgaatttt  
ttctccttg

>MITE\_T\_19642

ggctagagtacctgtatagggagagtatggacagatcggttcatggagggccttagggcccaaaagtgcagccacccttctaaccaacttctagc  
gcacaaaatttctcagtcagattccaattctaaccaagatggctaagaatgtacataaatgagcgttcttcgcaaaaatgagtaaattta  
tgcaaaaagtgtgtcaaaatcgtgctttacaaacgatgggtcgaacaattgtattagtaaagcgctctggataaattgaaattcataggttggtgcat  
ttctgggcctaactttattcgcggagacatatcgggtgaaggcctgatggattttcggagtttcacatctgtccatactctccctatacaggtactctat  
gc

>MITE\_T\_19661

gtctgtcccagataggaagagcgtggaataatcagaataatttgcactatgtagaagcaaggtttcgttcgttctattgtTCCGACTAAT  
CACCGAGCAAACCCCGCACCGTACAGAGGATTGGTTGTGAGCTCCGCGGCGCGACGCC  
GACGCGCCGCGCCCGGCGTAAGACGCCGGGCGTCTTACGCCGGGAATCCGCTCCTGGG  
CCTCGGGGAAAACCATCGCGGAAAGATGCGAAGGGAGTATGCGTTGCCTCGAGGTGGC  
TTGTGGCCCTCTGTGCGACGCATTTGAGAGGCGACTAGATGACAGGTAACAAGAGTTGA  
GGTACCGCCAACCCGCCAAATGGTGctaattattctgattttccagcgtcttctctatctgggacagac

>MITE\_T\_19668

GAAACTGTAGATTGGTGGTGGCTTACgaaactaggggagcgagaaagtaaaaacgtGACATACATGGAG  
CGGTTCGTTCAATAGGGGGGAGGGGACAAGGCCGACTATATCTtgcataacctcaatacatGGAA

TCTTACGGGAGCttttacaataaattatttAGCGTTGAAATTTTATAATCGTTAACTCACTTGATGAAT  
GGCTAAGTTCCATGtctggacacagattttcaaacagtgtgTTCTAAATTTGATATAAGTCCATATTCAGC  
AACATCCCATTAGAAGTCATAGAAACCGACTATCTTCGTCCTGGCCTAATTGTTGCTCCT  
GGTAtgtttacgaatttcactgttgGCGTAGCATAGGATCCCCCTATCTATAGTTTC

[illegible]

ctcTTCGGAACCCAGATACACTCTACTACAAGTACGGACA Aagggaattttagaaaatcgtcgaaacgcgta  
gatttgacagcgcCCAATGGTACGACTGCAATGCCATATCGAAAAC TTGTTATTTTCGGTTCTA  
AGAGTGGGTCTAATCAATtggtgtgtatttttcgtgtccttAGTTAAGTTTTCCGTTATTTGgggttttatcaatttt  
aaaattcatctgATAGCTTACTGAAACTACCAGGATCTGCCAGAACCTCACTTTGAATTGCGCG  
GCAAAGACGGTGCCACTTGCGACATCACTCGATGGCCTA gattctcagcgtgccacttaggcaccccggtt  
gtccataacctgtagtagagtgtaccttgcttCAGAAAG

gagggtgctgcagctaagttgacgggtgttcacgttcggtttgcaagcgccgACGACGATTTTGGGCCTATCCACAGAC  
CCTCGCTCGCTACTATCCATCTCAAAAATATCGGACTCTCGCGGTCATGAATGATTAACA  
AAGTAACACAAGATTGAAttggttttaatactttcaaacatCGAATAACTCTACTTTTCAGCTACAATG  
AAATTACAACCACGTAAAGGTCGCCAGTCATAACTGAAACATAGTTTGTTTACAATATGA  
TCATAAGACGGATGTTTTCAAGATGGACAGTAGCGAGCGAGGGTCTGTGGATAGGCCCA  
TAATCGTCGTcggcgcttgcaaaccgaaagtaaacaaccgtcaacttagcagACGACACCTC

atttagagtacctgtatagtgagagtatggacagatcgcttcattggagggcttagggcccaaaagtgcagctaCCCTTCCAACAgctt  
ctaacgcacaaaatttcactgccagctctgcagatttcaattctaactaagatggcaagaatgtacataaatgagagTTCTacgcaaaaatga  
gtaaatttatgaaaaactaagtcaaatacctgctttataaacgatggttcgtaacagttatattagtaaatacgctctggattattgaaattcataggtg  
gctgcatttctgggccctaactttattcgcagaggcacatcggtgaaggcctgatgggttttcggagttcacatctgtctatactctcgctatacaggtg  
ctctagtt

ctgtagagtacctgtatagcgagagtacagacagatgtgaaactccgaaaatccatcaggccttcaccgatgcctccgcgaataaagttagggc  
ccagaaatgcagccaacctatgaattcaattatccagagcgattatcaatacaactgttacgaaccatcgttataaagcacgtatttgacttagttt  
ttgcataattttactcattttgtggaagaacgctcattaagTACTTTCTcgccatcttcgtagaattggaatctacagactggcagtgaaat  
tatgtgcgtagaagttggtagaaggggtggctgcacttttgggcctaagccctccatgaagcgatctgtccatactcccgtatacaggtactct  
aacg

agtttagtgactctgtatagcgagagtgatagacagatgtgaaactccgaaatccatcaggccttcaccgatgctccgcgaataaagttagggc  
cagaaatgcagccaacctatgaatttcaattatccagagcgattttataatacaattgttacgaaccatcgttataaagcacgtattgactagtctt  
gcataaatttactcatttttgggaagaacgcctcatttatgtactttcttagccatattcgttagaattggaatctacagactggcagtgaaatttgagc  
gttagaagttggtagaagggtggctgcacttttggtcctaagccctccatgaagcaatctgtccatactctcgccatacagggtactctagtt

gagtacctgtatagcgagagtatagacggatgtgaaactccgaaaatcatcaggccttactgatgcctccgcgaataaaggttagggcccaga  
aatgcagccaacctatgaatttcaattatccagagcgatttataataacaactgttacgtatttgacttagttttgcataaattactcattttgtggaag  
aacgctcatttatgtactttcttagccatcttggtagaattggaacctacagactggcagtgaaattttgtgcgtagaagttggtagtaggggtggct  
gcacttttgggccctaagccctccatgaagcgatctgtccgtactctcgctatacagggtactctagtgtgcatactctctcaatacagggtactc

— — — — —

GAGTACCTGCAAtggcgagagtatagacagatgtgaaactccgaaaatcaatcaggccttcaccgatgcctccggaataaagttagg  
gtccgaaatgcagccaacctatgaatttcaattattcagaacgatttactaatactattgttacgaaccgtcgtttataaagcacgtatttgactcagt  
tttgcataaatttactcatttttgcggagaaacgctcatttctgtacattcttgggtacatttgggttagaattggaatttgagactctgcaaattgacagtg  
aaatttgtgtggaGAAGTTGATTAGAGGGATGgctgcattttggggccctaagacctccatgaagcgatctgtacATAcgct  
cgctatacaggtactc

>MITE\_T\_20095

GGGTAACCTTTATTGGGAGAGAATGGAaagctcgaaaatttggagggtagggttgatcagggtcatgtagctcctAGGG  
CCCAGAAAGGTAGCCAACCTTTGAACTTGAATTATTCAGTGGTACTAATTCAAACCTATgag  
agtaggtacactgatcaaaaattataaaagacgtacaaaatttggatttcgtatacattttcttagtttcaaagtcttaataccttaaaaacgcttggtg  
CAACGCACTGTCGGCcttattgattaatcttcaagtGCATAAGTTGGCAGcagcacttttctagtgtattgcgtttttcacg  
ttgtcgcccttttggggccctaagagctaaataaatcgagttgtccatactctccctataacgGTACTC

>MITE\_T\_20144

GCCCCACATACACGGTGAAAGTGGACCTTAATATTGGCTTAATGTGGGAGTCACCGATGC  
GTTGTTGAGCAGTGAACCTTAATATTCGCCGGGGCCGACGATTATTAAGGCTCACCGATGG  
TATTCTGAATCGACGATCACCATTCTCTGCCATCCTCTGGAGGATTGCTCTGTGTTTGGTT  
TTCTCCCGGTCGTGTAGTGTGGTTAgtggagttttttattcgttttcgcATGCGTTTCGCAATTTTCAGT  
CATTAAAATGTCTTTTCATCGATAGGAACAAGAACGTGAAGAGAACAGtcctacttaaaattaaaattat  
gccCAAGCCGGGTAAATCATGCTGGGAGTCGCTAGCAGGTAGAGCTGGTGTGCACGATGA  
CAAATCCACGAGGGTAGTGGTTCAGCCCCAAAAAAGTTATTCTGAACCTATGAACAATA  
ATTCACCTAacccaaaataatcataatatgTTCGGTTGAAATTTCTTTTCATGGTTGGAATAACAAAAA  
ACAATCAACACATAACCTTCAATATTCACGTGCACTTCCAGAATTCTAAAAAACCAACA  
AGTTAAGTCACTGTTGTCAGGGTTGTATAAATATGTTCACTAACCCGTTTGAactcttatgaaaaat  
ttgtattgggCCTCTAGCTCGGCAACAATGCTAGGCCCTGCCGATTTAATCGTGTAAGTGTCTGT  
TTAAAGTGACTTTGAAGGTCACCGCTCAACAACGCATCGGTGACTCCCACATTAAGCCA  
ATATTAAGGTCCACTTTCACCGTGTATGTGGGGC

>MITE\_T\_20197

attggacgtattttactaaacagacctatgtgcgagtgagaaatatgggggtgtgctcgtagttctctttgcgtaagagtgaatgagaataataaag  
cgccagtgacgtcagcggcaacgaaggaGCGCCGGCACAATGGGGAGatcggttgaggaggagctttaactcatgagccctgt  
ccacaacgctctcttgacatgcccgggctcatgactgccgcattcagttggcacataggtctctttgatagaatgaaaaatcccgcttttccaattct  
tcaaaagggaatcacgtccacttttacattgcttcttatgcagcttcgacgagcacaccccatatttctcacctccacataggtctgtttggtagaata  
cgctcgccaat

>MITE\_T\_20500

ATATTGTTGTGGGGGAATGCTGGCACAAATGAAGTTCACAACCAAATATGGAAATAGCA  
CAATGAATACATATATATCTAAATCTCTATATAAATCTCTATATGAATAGCAACACTCACAG  
GGGCCGACCGGATCTAGCTCTAGAATCTTTCCTAGATGACTGATCTCGCCACGTGGATA  
TCACATCCTTTTATGCCAATGCTTGAACCTCCGAAAAACGGAAGCTCTCCGCGCGGACAT  
AAACAAATGCGCCTCGAGAAACTCCGTCCGATAGGACTGACCCTGGCCTCCGCGATTTC  
TCACGAAGAGCCATGCCGCGAAGCATGCCTCATCTACGGAGCTGAATGTGGACACCAAA  
CCTGCAAGGTCTGGTCCCACAACAGTAT

>MITE\_T\_20536

aattggacgtattttctaccaaaacaaacatgtcgacggtgaaagtcagcaatcacataactcggtttgcgacgtcgagacttctgtcatactta  
atttttaaacggaaaactactcaacggtaattctttaaaacttccgtgattttcttctatgtgcgaggaaaattctgaaaaactcaaggaatcatgt  
ccatttgttctctttaaaaaataacatagttgcggagattttcagacaccgcaaacgagttatgtgattgccgactgcaccgtcgatgtgcattaa  
gacatgagccctgagaccataagcataaatgcataacaggacttacgtcataatgcacatagttccggttgatagaatacgtccaaat

>MITE\_T\_20563

aacggagagaaaaatttcgtgcgtgggacccgaagtttaggtcatatggatctcagaagtttaggtcatatggatccctgaagtttccgattgagc  
atctgaacacttttagatctagctgtcgaggttcggatcacacatctgaaacttcagttcttacattgaagtacttcggtatttctcacatccgaaaaact  
tcggttctcccATCCGAAAAAacgtcggttctcacatctgaagtacttcagatttaagaactgaagtttcagatgtgtgatacgaacctcgac  
agctagatctaaagtgttcaagtgttaatctgaaaacttcagagatccatttgacctaaacttcgggtcccacgcacgaggttttttctacgtg

>MITE\_T\_20566

ATTGGACACAAtctctaccaaacagacctatgtgcaggtgagaaatatgaggtgtgctctagagagctgcataagaaacaatgtaaaatg  
ggCGTGATtcgttttgaagaattggaaaacggggattttacattctatcaaacagacttatgtgccaactgaatgcgggatatatgagccgcg

ggcatggcaagggagcggttggtgacagggctcacgagttaaaggGCACCGTCGACGAGCTCGTCGTCGTAACGC  
GCatcggttcgtgccgctgacgtcactggcgctttattattctcattcactcttacgcaaagagaatcaacgagcacaccccatatttctcacctcca  
cataggctgtttgtagaaatacgtccaat

>MITE\_T\_20625

attggacgtagttctacaaacagacctatgtgcaagtgagaaatgtgggggtgtgctctagaaagctgcataagaagcaatgtaaaagtgggtgt  
ggttccttttgaagaattggaaaagcgggatgttgacattatcaaacagacctatgtgcaactgaatgcggaactcatgagccgcgggcatggc  
aagagagccttgtgcacagggctcacgagttaaagcgccccgacgacctctccccgtcgttagagtgcgactcattgccgctgacgtcactg  
gcgctttattattccattcactcttacggccagagaactgacgagcacacccacatttctcattgcacataggctgtttgtagaaatacgtcc  
aat

>MITE\_T\_20701

cactgaaaaaatggttatgTAGTGAGAGTCCATATACTGCTTGGAAAATGTAAGGTATGAACAGCT  
CGTACATACGGTCTGGCTTTCACGACTAGAGCAGAGATGTGCTGTAAACATGTCATGTAT  
GAAAAAGCATGTGTATGAACTTACTGTTTCATACGGTATGGACGCTGAGTCCATACGGTAT  
AGACGTTGGGTTCATACGGTATAGACGTTGGGTCCATACGGTATGGACTCAGAGTACATA  
CTCTTCGTATGTAATATTTGTTTCATACTGAAATGGACTCTGTCTTTATTCATAGGtcggcatcaaa  
ttttcacaggctGTATACGGCCCCGACCCCATAATTTATGAAGCGTGAGtcgtaaatttttttcagtg

>MITE\_T\_20913

cacggagaaaaaacctcgtgcgtgggacccgaagtttaggtcatgtggatctctgaaatttcggattgagcatctgaacactttaggtctagct  
gtcgaggttcggatcacacatctgaaacttcagttcttacatctgaagtacttcggatgtgagaaccgaagttttcggatgtgagaaccgaagtctt  
tcggatgtgagaaccgaagttttcggatgtgaaaaccgaagtgttcagatgtaagagctgaagtttcagatgtgtgatccaaacctcaccagct  
ggacctaaagtgttcagatgtcfaatccgaaaacttcagagattcatatgacctaaacttcgggtcccacgcacgaagttttttctccatg

>MITE\_T\_21014

TCTAAGGCCCTTTCCTACTCGAGCgcggttcgaggaacttattcgacgaactgctcagttcccgaaAACTTGCTCCT  
CAAAACGAgggatgctgtccacacgagttcatTCGAATTGGAACCGGAACCTTccataaaactatacaattattgcaaaa  
tactaGATTACTGCGGCCGCGAGAGTAACAAAAACGAATGGCAAGAcataaaggacgtaaaaaacaag  
aacaaaCAAATCcacaaaaaggaacataGAAGCTgggagtacgggggaagttcgggggtttggaggaataagtttcagctcag  
ctaaaactgttcgGGAACAAGTTCCCCGaactaagttccgcgaaccacgctcgtgtggacaaggccttagaa

>MITE\_T\_21034

gagtacctgtatagcgagagtatggacagatcgcttcacgagggccttagggcccaaaagtgcagccacccttctaaccaacttctaacgcaca  
aaatttcactgccagctctgtagattccaattctaacgaagatggctaagaaagtacataaatgagcgttctccgaaaaatgagtaaatattatgcaa  
aaactaagtcaaatacgtgcttgataaacgatgggttcgtaacagttgtattaataaatcgctctggataattgaaattcataggttggtcatttctgg  
gccctaactttattcgcgaggcatcggtgaaggtttgatggatttcggagtttcacatctgtctatactctcgtatacaggtactc

>MITE\_T\_21128

catggagaaaaaaaactcgtgcgtgggacccgaagtttaggtcatatgtatctctgaagttttcggattgagcatctgaacactttaggtctagct  
gtcgaggttcggatcccacatctgaaacttcagttcttacatctgaaatttcagttcttacatctgaagtacttcagatgtgagaaccgaactttttcag  
atgtgagaatcgaagtttttcggatgtgaaaaccgaagtacttcagatgtaagaactgaagtttcagaagtgtgatccaaaccttagcagctggac  
ctaaagtgtcagatgtcfaatccgaaaacttcagagacccatatgacctaaacttcgggtcccacgcacgaagttttttctccgtg

>MITE\_T\_21303

GCTGGATGTAGAGTAaactatataggagagtatggacagctcgaattatgtagctcttagggcccaaaagtgtaggtaacctttga  
aaacgaaaaatttcactgtcaatcttttagactctaataatcaaacgaaaatggacaagaaaattcatacgtAAGtatcttcgcaaaaatgagtaag  
tctatgcaaaaaccaagtcaaatacgtgctttaccaacgacagttccaacaattgtgattataaatcactctggataattgaattcataagtTGC  
CTACctttttgggttctaagagctccatctcctaacctcaaaatttcggacATGTCCAATtgttcatactctcctatataggtactctagat  
ccaCC

>MITE\_T\_21345

aagcccaattcacattatcaaacttttcatccaactcttgatgcaatttgtgaatgaaaagttggatagtgatgatactgatgtgagaaaactaaaatt  
tgatgaaaaattgaacggtaacttaaatgtgacgtcacattcaacttctgttcaactttccatccaattaGCAGCGcaattggatggaaagtt  
ggagCGAAAAGTTGGAACAAAATCTTCCGACCAACATGAGCCGAAGCTGTATCTTCCGAAC  
CGCAAGCTGATGACGATATCACACTGCAACCGtaatcgaatcaaattttctgcGTCCAACCTTTCCACC  
CAATTTTTAGTTCAATCATGtcagatgaaaagtttgatagtgtaattgggctt

>MITE\_T\_21428

attggacgtatttctatcaaacagatttatgtggaggtgagaagtatgggatgtgctcgtcagttctctggccgtaagagtgaatgagaataataaa  
attccagtgcgtcaacggagatggatgccGTCGTGCAGCTCGCCTCGttggtcattaactcatgagccctgttcgcaacgctct

cgtgccatgcccgcggctcatatatccgcattaagttggcacatagttctctttgctgaatttaaaatcctgctttccaattcttcaaaaggaatcac  
gcccactgaccacattgtttcttatccagctttctagagcgcaccccatatttctcacctgcacatagttctgttgatagaaatacatccatt  
>MITE\_T\_21468

attgggcgtatttatggtaaaaggaacatgcgcgcaagtggaagatgggggtgtgctcgtggaagctgcataagaacaatgtaaaggtggat  
atagttccttttgagagaatggaaaagcgggattctacattaaatcaaaaggaactgagcgcctaactcgtgagccgtgggcatgtcaCAAGA  
gtcttgggacagggctcatggagttaaagagtccccccacTGATCTCCCCGTCGTGCCCGGGCTCGTTcggtaccgct  
gacgtcactggcgctttatattccattcattcttatggccctcaactaacgagcacaccccatctttccacttgacatagttccatttagcataaat  
acgtccaat  
>MITE\_T\_21588

GAGATGtcatcagctaagttgacgggtgttactttcggtttgctgGCGTTTTCGCTttgctactatccacatgaaaacatctggctctc  
tcagaagcaagaacacaagcttagataagttttgaatactttcaaaccttgtaacactaTAATTTTTAGCCACATAGAAATTA  
CAAccacaaaaaatgcaaaaaagtcgaaaaatcataactgataagtagtttttacgatacgatcatgagactgatgttgATGAGACT  
GTTTTCAATATGGATAGTAGCGAATgccgctttgttcagaggcccaaattcgtcgtCGGCGCTTGcaaactgaaag  
taaacaaccgtcaacttagctgacgacacctc  
>MITE\_T\_21595

ttctaaggccttgtccacacgagcgcgggttcgaggaactgttccccgaacagggttttagctgagctgaaaacttattcctcctaaacccggaactt  
ccccgtactccgagcttctgcataagtttctttgatgtgaattgtttgtttttacgtcctttacatgtcttgacattattttgttactttggcggc  
cgtaataatctattatcttgaataattgtatagttttattgaagttccgggtccagttcgggcgaactcgtgtggacagcatcctcctttcaaggaac  
aagttccgggaactgaaaAGTTCGTCTGAATAAGCTcctcgaaccgcgtcgtgtggacaggtcTAACAA  
>MITE\_T\_21625

CTGGTACCCAAGTAGCAGacgttgcaacaacttgcaacaaaatcgtttagTTCTTGCAACcaatagattgatgtgcagat  
tgcctactctctccccgaaggagctatcattgtcggaaactagttgcaattaagctgaaacatgtttcaacctcaaagtattgctggtgcctatcttta  
gattttaaacaactttggtgcagcaattttgcaatctcagcaggttgcaacttaGTTTTCCAATtagatcgccgaaaatcggcacttatcga  
ccaaaagttgactgaaagttgcaactttgttgcaactaatccgacattgtttcaacattttgcaactttacattgaaaaatgctactgggtagcgA  
G

>MITE\_T\_21756

GAGCACCTATAAAGGGAGactatggacaactcgaaatatgtagcccttagggcccaaaagggtaggtaacctttgaaaacgaa  
aatgtcactgtcaatctagactccaatatcaaacgaaaaatggacaaacaaattcataagtaagcattttccgcaaaaatgagtaagtgtatgcaa  
aaaccaagtcaaatacgtgctttaccaacgactgttcccaacaattgtgattataaatcactctggataattgaattcatagattgctaccctttgg  
ggtccaagagctccatcacctaacctcaaaattttcgacatgttcatactctccttatataggtactctaactgtggctatataggtactc  
>MITE\_T\_21829

cacggagaaaaaaaacctcgtgcgtgggaccctgggacccgaagtttaggtcatatggatctctgaagtttcggattgagcatctgaacacttta  
ggtctagctgtcgagggttcggatcacacatctgaaactccagttcttacatctgaagtacttcagataagagaaccgaagttgtcagatatgagaa  
ccgaagttgttcggatgtgagaaccaaagtacttcggatgtaagaactgaagtttcagatgtgtgacccaaacctcagcagctggacctaagtg  
ttcagatgtcaatccgaaaacttcagagatccatagacctaacttcgggtcccacgtacgaagttttttcctccgtg  
>MITE\_T\_21934

gagtccctttataccagagttaagacatctcaATTCTGGTTCGGGCTTGTTTaggcttagagtccctttatactgagagtcaagac  
aatttgaatccatttctgattgggtcccgtattttaggctccacagtgtcacaacgggaataaagattacattttcaccaattgcaaagattatagtct  
ggaatggaccagggaattacggggttcggcaaggaacaaacgggaatgagaggaggaacgggagaaaggcatttgagaatgggcccgatcaaag  
attacgaaaaacgttcaatttctgtaatctttatcccggtttgtgacatccatgagccgaattgtcttgactctcagtataaagggactc  
>MITE\_T\_21989

cacggagaaaaaaatcctcgtgcgtgggacccgaagtttaggtcatatggatctctgaagtttcggattgagcatctgaacacttttaggtctagtt  
gtcgaggttcggatcgacatctgaaacttcagttcttacatctgaagtacttcagatgtgagaaccgaagtttttcggatgtcatgagaaccgaa  
gttttcggatgtgaaaatcgaaagtacttcagatgtataagaactgaagtttcagatgtgtgatccaaacctcagcagctggacctaagtggtcaga  
tgctcaatccgaaaacttcagagatccatagacctaacttcgggtcccacgcacgaagttttttctccgtg  
>MITE\_T\_22516

tggacgtatttatgctaaattgaactatgtgcaagtggaagatggcgTGTGCTCGTTAGtagtcgggccataagaatgactgggaaat  
ataaagcgtcagtgacgtcagcaacaacgacgagagaacgacgatcaaCGACACGgtctgtaactcatgagccctgtccacatgGC  
TCTTGTCATCTGCCCCacgtcacgagttagcgtcagttccttttgatttaattgaaaatcccgttttccattttctcaaaaggaacta  
ctagGAACACTGACCGCATTGTTTTTaaaccagcttcacgagcacaccccatctttctcctgcacatagttccttttagcata  
attatTGCGTCCA  
>MITE\_T\_22550

aggccctgtccacacgagcgtgggttcgaggaacttattcaacgaactgctcagttcccggaaacctGTTCTTAAAACGAAGCA  
TGCTGTCCACgcgagttcgcccgaactggaaccggaactcaataaaactatacaattattgcaaaataataggtTATGACGGC  
CGTCAAAGTAACacaaataatgtcaagacatgtaaaggacgtgaaaaacaaatagaaacaaacaaattcacatcaaaagaaacat  
atgtagaagctcggagtaggggggaaatcccgggttttgagggaataatcGCGACCAacgaacaagttcctcgaactaagTTCCGc  
aaaccgctcgtgtggacaaggct

>MITE\_T\_22579

aagcatgggtctagttttctggcaaagctcattccctgattttccctgatttacaggagctcattccctgatgagataccgaagttttctcccacttc  
ctgggattttctgggaaaaggGTATAACtttcagagtttcagatatgaaatcgattttaattaatcctacagccatttcttggcgacgtc  
AGATCAGACCGCCGCATTTGAAAATAAATAGTCCCTgggtgggtggagaagagatttccggtttctggaaca  
gattccctgaattttctgattttccaggtaaattttcattccctgatgaatcccgggttttccgggtttgaaaaactagacacatgaat

>MITE\_T\_22644

cacggagaaaaaaactcgtgcgtgggacacgaagttgaggttatatggatctctgaagtttccggattgggCACCTGAACACTTA  
AAGtcaagctccgaagttcaggtcagacatctgaaacttcagttcttacatctgaagtacttcagatgtgagagccgaagttttcggatgtga  
aaaccgaagtacttcagatgtaagaactgaaatacttcagatggaagaactgaagtttcagatgtctgacctgaacttggcagctaaaccttaagt  
gttcaggtgctcaatccgaaaacccCAGAGATccatccatgatcctaaactttgggtcccacgcaagcagtttttctccgtg

>MITE\_T\_22655

cccaagtagcagagatCGCGataatagcgattttatcggttggttatcgcgattgtATCGGTGGCAacatatcgagatattatcgatta  
aaaatcgcgatacatggcgattaaattgcaacaaatcgcaatttttggtcgataaaatcgatcaattttgtcgatataATCGAGataaaatc  
gccatttatcgcgattttatttcgaaaatatcgcgataaattgtcggcgataaagCCGCGATCATATCGCgttaagatcgaggataat  
tgctcagatgttgatgatcctggtgATTTTattgccgataaaatcgcaatatatagcgatttttccgatGAGAAATGCTAATTGGG

>MITE\_T\_22798

TTATAATTAGGGCTGttcaatcggttgctggttaaagctacctaccgaaacagttccgttaagaaaaagttacgataagagcgatcttg  
ccgatagcgatcagagttttcgagctggcgaaaataagctgttgccatttgtacatctatttcatgcccgcgcgaggaatctgataaacc  
gacacacggggcaacaatgcattgagtgcgagctctcaaaaatccgataaggccggctgtgtcgatatcattgccactgtcggtagtcagG  
TAcatactgccgccagtttcaataagagacgatatcgaaagagttccggcaagaattcgttgaacaccccccaATAATTATAA

>MITE\_T\_22863

GAGGTGTTGAGATAAGTTGACCGTTGCTTACTTTTGGTTTGCAAGCGCAGACGACGAAT  
TTAGGCCTCTGCACAAAGCGGCGTTCCTACTATCCACCTTGAAAACATCCGTCTCTAGA  
TTGTATCGTgaaaaaactacttatcagttatgcaACTGAACAGGATTTCATGACTTTTATGTGAtagtatttctgtg  
tggtctaaaaattacagTGTTACAAAGTTTGAAAGTATTAGAAAACCTTATCtcagcttggttctgtctctgcgaG  
AGtcggatgtttcatgtggatagtagtgacgcgaaaatgcttgcaaacggaaagtaacaatggttaacttatctgacgacacctc

>MITE\_T\_22884

gagtcctttatactgagagtcgaagacaatgtgaatccatttctgattggttccgtatttttaggccttcacagtgtcacaaacgggactaaagattac  
atttcacagattgcaagattatactctggaatggaccagggaattacgggttcggcaaggaacaaacggaatgagagaaggaacgaagaga  
ggaatttgagaatgggccgatcaaagattacaaaaacgttcaatttctgtaatttttccgtttatgacttcagaggggggtgtgtctgactct  
cagtataaagggactcaactGAAGATGAGGCATTATGCCCCGTGCACAATTACGGGTGAACACTCCT  
gcaagccgattattgaaactgatagacaaagctataggcgaAGACGACAAAACGGGtttagagggatcctatttggtggaagctag  
agtccctttatactgagagtcgaagacaattcgggtcatggatgtcacaacgggaataaagattacagaaattgaacgttttcgtaactttgatcg  
gccatttcaaatgcctttctccgttctctctcattccgtttgttccttgccaaaccgtaattcctggtccattccggattataatctttgcaattg  
gtgaaaatgtaactttattccggttgtgacactgtggaggcctaaaatacgggaaccaatcagaaatggattcaaatgtctggactctcagtata  
aagggactc

>MITE\_T\_22912

cacggagaaaaaaactcgtgcgtgggacccgaagtttaggtcatatggatctctgaagttttggattgagcatctgaacacttaaggctagctg  
ccgaagttcaggtctgacatctgaaacttcagttcttacatctgaagtatttcagttctcacatctgaagtacttcagttctcacatctgaagtacttcag  
ttcttacatctgaagtacttcagatgtaagaactgaagtttcagacgtgtgatccgaacctcgacagctagacctttagtgttcagatgtcfaatctga  
aaacttcagagatccatatgacctaacttcgggtcccacgaacgaggtttttctccttg

>MITE\_T\_23020

CCCaatagcattttcaatgtaaagttgcaacagattgaacaatgttggcattagttgcaacaaattgcaactttcgggtcaacttttggtcgat  
aatTGCCGATTTCggcgatctgatcggaagacaaaggTGACCTGCTGAGATTCCAAAATTGCTgcacaaaa  
gttggttaaaatctaaagataggcaaccagcaatactttgaagttgaaacatgtttcaacttaattgcaactagttccgacgatgatagctcctcggg  
ggaaAGAGTaagcaatctgcacatcaatctattagttgcaagaatcaaacgattttgttgcaagttgttgcaacctctgctactggg

>MITE\_T\_23152



cacggagaaaaaacttcgtgcgtgggacccgaagtttaggtcatatggatctatgaagtttcggattgagcatctgaacactttagctctagctgt  
cgaggttcggatcacacatctgaaacttcagttcttatctgaagtacttcagttttcacatccgaaaaacttcggttctcgcacccgaacaacttcg  
gttctcacatctgaagcaccacagatgtaagaactgaagtttcagatgtgtgatccgaaccccgacagctagatctaaagagttcagatgctcaat  
ctgaaaacttcagagatccatagacctaacttcgggtccacgcacgaggtttttctccgtg

>MITE\_T\_23297

gagtcctttataccagagtaacgacaactcgattatcagctgactggcagccgaccttggctggccatggaggccgaaactagtgactcaa  
acgaacgatattgggggataaggatcaggaatcctgcgatgtctgtcacacagaaacaacaacatcaacaattgatcaataaaaagaaatg  
agattggtttgaataatttctaatctattttcattttggaccgatggcaataacaatttactcttgataaaccacaattaggtaatattttcattattctg  
ttcacatacagaggtaccgccatcttgggtgactagtttcggcctccatgagcgagaaccaatcagaattggatttttttaggccactttcagccca  
atcctggcccaacaaaaagtgagttgtcgtaactctgggtataaaagggactctacctttatactgagagtcaagacaatgtgaagccgtttctgatt  
ggttcccgtatttttaggccttcacagtgtcacaacgggaataaagattacattttcaccgattgcaaagattataatctgtcatggaccaggggaatt  
acgagtttggcaaggaaacaacggaatgagagaagggaacgggaGAAAGGAATTTTCAGAATGAGCCGagcaaagatta  
caaagaacgttattcaatttctgtaatctttatccatttgtgactccatgaggggtgtgtcttgactctcagtataaagggactc

>MITE\_T\_23380

agccagagacaagagaccctccaccggcctcctagcgacaggtggaagattttactttcggggattcaacagttccttatggacaattattaggg  
agcatcagtcacaccctaatttcgggtgttgacctacctacatggctgatgggGAGCTCCGGGTGACGTCcttagccaaacaagt  
ttcacaactttggccattttcgacttgttgcaaacgaaactaccaacacgttgtaaacaatcaaccatgtaggtaagtaacagtagaatgctga  
agtcccgaaagtaataGCTGCCAGAGTAGCTTCCACAATAGCCGAggtacgagtgagggtctctgtctctgatt

>MITE\_T\_23540

tcgataccatccaaggtagatttacacaggtatggaaaagttgaaaatttcccatgagtatcagtacgtgtcacatgactacgtgacgtaggttaag  
gggcccgtttttaattaaattacaatcaaattagcattcaaacgtttgtgcgttttaaacgttaaaattaatatcgattatcaaattgtgcaaaaaatc  
ccacaaaattttgacaaacgataaacggaacataataatcaaaataatcaaaacattcaaattggctgacgttaagggggccgctggagagcca  
atcagaggccagttgtaagtctgtccatacctgtgtaaatctaccttgataCCATCGA

>MITE\_T\_23615

gaggtgtcgtcagataaGTTGGTCATTGTTTACTTTTCGGCTTGCAGGTGTTTTTGCGagactactatccacat  
gaaaacatctaaTTCTCACAGAAGCGAGAACAACAAGCTTGGATACATTGTTTCATACCTTCAAA  
CCTTataacttcaatttttagccACGCAGAAATCACAAACCGCATAAAAGTTGCGGGTCATAATTGAT  
AAATAAGTTTTTTTATGATATGATCATGAGTCggatgttttttaaaggtagtagTAGTGAGCGCCGCTTT  
TTACAGAGGCATAAATTCGTTGTTCGGCGCTTGcaactgaaagtaacaatggCCAACCTTATCTGATG  
ACACCTC

>MITE\_T\_23718

gagtcctttcaTCACGCGATCATACGCGAGTCAGTGgcgttagagtccttttatactgagaatcaagacaatgtgaatcca  
tttctgattggttcccgtatttttaggccttcacagtgtcacaacgggaataaagattacattttcaccaattgcaaagattataatctggaatggaccg  
aggaatttcgggttcgacaaggaacaaacggatgagagaagggaacggagaaaggaatttaagaatgagccgatcaagatgacgaaaaac  
gttcaatttctgtaatctttatccgtttgtgactccatgaggggtgtgtcttgactctcagtataaagggactc

>MITE\_T\_23726

CAGCACTCAGACGTATTTTGTGTTGGTGTAAACAATCGTAACTGTTTCGCATCAGTGTGTGA  
CATTCGTATTTTGTGTTGAGTGTTACCGGAAATGAGGGGGCGTGGTTTATttaatcggaattttttgca  
caacatGGCAACGCTGTCCTAACATTTTGATATGTAACACTTGCAACGTGCTCGGAGCAGGT  
TGCAGAAATGTTATGACTGTTGTGTACATTTGTTAACAAGATTTCTAACCTTATTTCTAGCT  
GCTTTGCTCTCATTGTTTGTGAAAAAGTGAcacaataacacaaaattggTAACAGGGAACAATTGT  
TGTGGCAAACAAAATACGACTGTAGTGTTG

>MITE\_T\_23802

GAGGTGTTGTTCGGCTAAGTTGACCATTGTAACTTTTTGGTTTCGCAAGCGTATTCGTGTCA  
CTCCTATCCACATAAAAACATCCGACTCtcgcagaagcaagaacacaagcttagataagttttaatacgttcaaactt  
gtaacactttaatttttagccacaggaATCACAACCATATCAAAGTCGCGGATCATAGatgataagtagtttttttacg  
atacgatcatgagatGGATGTTTAAAAGTGAATAGTAGCAAACGCTACTTTGCACAGAGGCCTAA  
ATTAGTTGTCTAcacttgcaaaccgaaagtaacaatagtcaacttatctgacgacacctc

>MITE\_T\_23858

GGGGTGTTTTCAGATAAGTTgacatttgtttattttcaatttgcaggcgttttcgcgtcctaactatccacatgaaaacatccgaC  
TCTCGCAGAAGCGAAAACATAAACTTGGATAGgggttttaatactttcaaacttgaacactttaatttttagccacaa  
gaaatcacaaccacatgAAAGTTGCGGATCATAATTGAAAAGTAGTTTTCTTATGATACGATAATGA

GACGAATGTTTTCaaggtggatagtagcgaacaACACTTTGTGCAGAGACGTAAATTCGTTGCCGG  
CGCCTGCaaattgaaagtaaacaatggcAACTTATATGACGACACCTC  
>MITE\_T\_23943  
TCTCAAGTAGCACAGCTTGCAGTAAGTGGCAATTACATTGTAAAAATacgttgtaaaaattgcaatg  
ccactgagtgtgtgtatgttgccatgctcatatttgaaggggcccctatttgaacttattgtaattgaaataagttgtaatttttcattgcatt  
gcatattgcctatctatctgacacatggagctcaCTTTGTAGATTGTATAAAATTGGCATAAAGCGactaaattatga  
aaaaatattacaattttatggtaaaaaattacaattttattgaaataaaattgcaatttaatttcaatatttcgttgactatGCTACTTGGGA  
>MITE\_T\_23974  
CCCAAGTACCCAAATAGAACAGTGCAACgataatattgaaattaaactacaatttgatttcaatacaattgtaattttttact  
attaaattgcaatatttttcatcatttaacCGATTTATACAGATTTTAAACAATCgacaaaatgagctccatgtgtcagaaaga  
taggcaatatgcaatgcattggaaaattgcaactatttcaattttattgcattaagTTTTTATTAAggggggccccttcaaattaggagtaggc  
aacacacacaacactcagtggaaacACAATATTGTCACTGCTATaatgtaattgtactattgcaatctgtgacttggg  
>MITE\_T\_24018  
AAGTAacctcatagagtacatagagtcgtaattgagagagctggcgccacttttaagcattttccatgtcccgaattccgagactcctgt  
gtgacgccgggtcacttttgcatacaatcgattgttgcgatacaggggtaccggccatccgatgacaacaacaacaacagaggagat  
aggaattaccaggtattccacacgccattttggatcgaaaatgtatcgaaaaagcgaccgaactcggcgcacaccgggctcggaattcgtcg  
agcagaacatggcgccagctctccatttacactgactctatataCTCTATGAGTACCT  
>MITE\_T\_24279  
accagagacaagagaccctccactaatattttggccattgtggaagcttttactttcgccGACTttagcattctactgttgacttacctacatagtt  
gatgtttaacaacgtgttggcagtttcgttttgaacaagccgaaaacatccgaagtttgggaaacttacttggtcatgacgtcacccgaagctc  
atcatcccatgtacgtaggtcaacagccaaaattaaggtgatgactgtgtcccttatcattgtccataaggaactgttgaaatcccgaagta  
aaagctttaccaGTCGCctagaggccagtgagggtttcTTGTCTCTGCGAT  
>MITE\_T\_24327  
gaccagagacaagagaccctccactagatcttggccaaggtggaagcttttactttcgggacttcagcattctactgtcgacttacctacatgggt  
gatgttcaacaacgtgttggcagtttcgttttgaacaagccgaaaatggcgacgtttgggaaagtatttggctcatgacgtcatccgaagctc  
atcatcgaccatgtagataagtaacagccgaaactaaggtgatgactgtgtccgaataattgtccataaggaattgttgaaacccgaaagt  
aaaagcttccactgtcgctaggaggccagtgagggtctctgtctctgtac  
>MITE\_T\_24439  
GTTagtcaaggtagatttacacaggtatggacaaattgaaaattcccatgagcctcagtcacatgactacgtgacgtaggttcAGG  
AGCCcggttttttacgtaaattacaatcaaattaacattcaaacgtttgtgctttaaagcttaaaattaatcgcggtatcaaaattgtgaaaaaat  
cccacaaaattttgacaaacgataaaccgaacataataatcaaaataacaaaacatacaaaatggcggaagttaaggggcctctggagagcc  
aatcagaggccagatgttcagttctgtccatacctgtgtaaatctacctgatagc  
>MITE\_T\_24474  
atgggccagttgcgctgggtcacagaatcgtgtttgatgcttactctgttagattagctaaaaataatgagatctgtctaaacaggAACTTTC  
CACGTTGAATATCAGCcaagatatcgtcctttgaaaagtcgtgttttgacgtcatccaccgcgggagtcataacatggatgtatta  
ccgcggtggatgacgtcataaaccgagttTCTCACGGCGctatatctcggttaattattctacgtaaaaatttgcgtttcagtagatcttattg  
tttttagctattctcaagaatcaagcatcaaaatacagattctgtgaccagcccAACTGGTCCAT  
>MITE\_T\_24835  
cacggagaaaaaaactcgtgcgtgggacccaaagttaggtcgtatggatctctgaagtttctgattgagcatccgaacacgtaaggtccagct  
gctgcggtttggatcacacatctgaaacttcagttcttacatctgaagtacttcagatgtgagaaccgaagttttcagatgtcaaaaaccgaagtac  
tttagatgaagaactgaagtttcagatgtgtgatccaaacctcagcagctggaccttaagtgttcggatgtcaatacgaaaacttcagagatcca  
tatgacctgaacttcgggtcccacgcacgaggttttttccgtg  
>MITE\_T\_24850  
cacggagaaaaaaactcgtgcgtgggacccgaagtttaggtcgtatggatctctgaagtttctgattgagcatctgaacactttaggtctagct  
gctgaggtttggatcacacatctgaaacttcagttcttacatccgaagttcttcggttttcacatccgaaaaacttcggttctcacatctgaagtactc  
agatgaagaaccgaagtttcagatgtgtgatccaaacctcagcagctggacctaaagtgttcagatgtcaatctgaaaacttcagagatccata  
tgacctagacttcgggtcccacgcacgaggttttttccgtg  
>MITE\_T\_24861  
CGcgaaggaaaaaaactcgtgcgtgggacccgaagtttaggtcgtatggatctctgaagtttctgattgagcatccgaacacttaaggtccag  
ctgctgaggtttggatcacacatctgaaacttcagttcttacatctgaagtacttcggttttcacatccgaaaaacttcggttctcacatctgaagtct  
tcagatgaagaactaaagtttcagatgtgtgatccgaacctcagcagctgacctaaagtgttcagatgtcaatccgtaaaacttcagagatccat  
atgacataaacttcgggtcccacgcacgaggttttttccgtg

cacgagagaaaaaacttcgtgctgtgggacccgaagtttaggtcatatggatctctgaagtgttcggattgagcattcgaacacttcaggtccagct  
gctgaggtttggatcacacatctgaaacttcagctcttacgtctgaagtacttcggtttcacatccgaagaacttcggttctcacatctgaagtacttc  
agatgtaagagctgaagtttcagatgtgtgatacgaacctcgacagctagacctaaagtgttcagatgttcaatctgaaaacttcagagatccatat  
gacctaaacttcgggtcccacgcacgagggttttttctccgtg

atacagggtgtctagcatcaggaaaaaccggaaaatatcaggaattttggccgatcaggaaaaatcaggaaaatatctggaaaatcgaaaaa  
tcggacgttttatcagaatttttcttacgcgaatctcctaGCGGAgcagtcttactgcttttgacctcggtccaagagtcgtcgccgtctt  
tgtttccgacaatttctgaaagaaaaatcaggaaaatatcaggaattttcaaaataaaaaaatcaggaattttgtataaaatatcaggaaaatcagga  
aaatatcaggatttttcaaaattaaataactagacaccctgtat

cccaagtagcatttctcgacggaaaaatcgctataactGCGATTTTATCAGCAATAAAATCGccaagatcatcaacatctga  
gcgaatGTCTTccatcttatcgcgataaaaacgcgctttatcgcccgacaatcatcgcgatttttcgaaataaaaatcgcgataaatgacaat  
ttaatctcgattttatcgacgaaaattgcgACGTGTAgtgatthaatcgccatatatcgcaattttaatgcgataaatatctcgatatattgccacc  
gatataatggCGAAAATCAACCGATAAAACCTCTATTTACcacgatcactgctacttggg

aacatagagtacatagagtcgtaaatgaaatgggagagctggcgccatgttctgctcgacgaattctgagccgggtgtgcgccgagttcggggtc  
gcttttcgatacattttcgatccaaatggcggtgtggaatacatggaattcctatctccgttggtgtgtgtgtgtcatcggatgaccgggtacc  
tgtgtatcgcaaaacaatcgattatgtatcgaaaaagtgacccggcgctcacacaggaggtctcggaattcgggacatggaaaatgcttaaaagtggc  
gccagctctcccaattacattacgactctatgtactctatggtct

atagagaatttcgaggtgtctgaaatgtgatgaatttcgtgtttaagtggaactactgagtgaactgaactcgaggatacccttggtcatgaattg  
aacaataaattattggagaagatatgtcAAATGATCAAATTTGCTCAAATACGTGAGtctaaatgggaaatgccgcc  
agtgccagatgacgtcactagggcgtgcattttctcacttctaactctattttatactattgcccgtatcaaaaaaaaaatgataaagaatactgtgaaa  
tcagctcttaagcacttccagatgaagcaataaaaaatttggttgcaaattctccat

tttacgatggagaatttgcatgcaatttttaattgcctcgtgtgaaagtgttaaagagctgatttcacagtactttttatgatttttctgaaatgggaa  
taattttaaagaagatttaaaggagagaaaaatgcactgcctcgtgacgttatctggcggcatttccattaaacacacgcatttcagcagattagat  
cattttgcatatcttctccaataattgtcaatttatgaaccaagggtattttcgtgttcagttcactcagtagttccacttaaacacgaaattcatcttc  
agacaactgc aaattctctattcgtTTA

atagagaatttgcagatgtctgaaattttgtaaatttcattctttaaaatgatactgcc**GGA**Acctgagtagcaggatatccttggttgctaaattt  
gacaattattggaggaaatataaaaaataacctaattctgctaaaatacatct**GCTCAA**ATgcggaatgcccgcagatgaagtcgatgag  
gcggcacattttctcacttttaaatctatttttctccaattttccatgtcagaaaaaattatgaaaaatactgcgaactcagctcattaagcgc**ACC**  
**CTC**agatggagcaaaaaaaaaaatttgcgtgcaaagt**CTCCAT**

cacggagaaaaaaacttcgtgagtgggacccgaagttgaggatcatatgatctctgaagtttccagaTTACGCACCCAAAAACT  
TgaagtcagctgctgaagtttgggtcagacacctgaagtactttTGTATATACCCGAGTTATTCAGATGTTGACCT  
GAACCCCTTCGGTAAGTATATACCGAAATATtttagatgtctgacccgaacttcggcagctggacctcaagtttctgaatg  
tttcggatgtgtgatccgaaacttcagaggtccataataatatgacctcaacttcgggtcccatgcacgaagtttttctccgtg

CATAGAGTActctatgtatgtatgtacgtacatagagtcgtaagtgaagtgggtgagctggcgccagttttaagcattttccagggtcccgaat  
ttcgagactcctgtgtgacgccgggtcactttttcgatacataatcgattgtttgcgatacacgggtaccggccattcGATGTAAGCAA  
AGAAGATAgggatcaccacgtatttcgcaccgccatcttggatcgaacttgtatcgaaaaagtgaccgaactcggcgcacaccgggt  
cagaactcgtcgagcagaacatggcgccagcgctcccatttacattacgactctatg

cacgagagaaaaagccttgctgctgggacctgaagtttaggtcatatggatctctgaagtttcagattgagcatctgaacacctaagggtctagctg  
tcaagggttcggatcacacatctgaaacttcagttcttacatctaaagtacttcacatccgaaaacttcggttctcacatctgaagtacttcagatgtaa  
gagctgaagttccagatgtcagacctgaacttcggcagctggaccgtaagtgttcagatgctcaatccgaaaacttcagagatccatatgacctta  
aacttcgggtcccacgcacgaagtttttctccgtg

gtctagcctagagtcctttatactgagagtcaagacaacacccctcatggagtcacaaacgggaataaagattacacaaattgaacgttttcgta  
atctttgatcggctcattcttaaattcctttccgttccttctcattccgtttgttccttgctgaacccgaaattcctcggtccattccagattataatctt  
tgcaattggtgaaaatgtaatctttattccgtttgtgacactgtgaaggcctaaaatccggttgaccaatcagaaatggattcgcattgtctgactct  
cagtataaagggactccagtctAGCC

>MITE\_T\_27017

caggggtgatccaggggtctaacggccagactgcaggagcgtgttctatgggtcaaaataagactttttgtttgttaagcttttccaaaagtcccc  
cagtcggagctacgccccccccctcaaaaaaaattggaaagtaaatcgtttccctgaatttgcacacgggtttgaaccaaatctcatgaaat  
gtgtgtttcGTGGACgttatgcctgaattcattATGATctaaaaacaattgaaatctCAATTTCTGAATTTGGGGgtgtgg  
gggtgttcggctcctgtagtctggccgtttaactctggatcacctg

>MITE\_T\_27129

GATtaacttgagtcctttatactgagagtcaagacaatgtgaatccatttctgattgggtcccgtatttaggcctcctcagtgtcacgaacggga  
ataaagattacatattcaccgactgcaaagattataatctagaatggaccgggggaataacgggttcgataaggaacaaacggaatgagagaagg  
aacggagaaaggaatttgagaatgagccgatcaaagattacgaaaaactgtctactgtgtaatctttattcccggtttgcgactccatgaggggggtg  
ttgtcttgactctcagtataaagggactctaagatTAAC

>MITE\_T\_27188

TATGaatagtcgtattttgttcgcccgaacaattgttctgttaccgattttgtgttatttgcATCACTTTTTTCAACAACCAATGA  
GAGCAAAGCAGCTAGAAGTGAGGTCAAAAATCTTGTTAACAAATGTACACAACAGTCG  
TAACAAGCTTTGGAGGACGTTCCGATTGTTTCGAAACAACGTCGCAAAACGTTATCAAATt  
gtgcaaaataaataaatgaataaagatAGGCCCCGCCCCCTCAACATAAATAACATTTCGAACAAAATAACAA  
CTGTTACGAGATGTTTCGGAGTTCTTTTCATCGAACAAAATAACGTCTAATCATT

>MITE\_T\_27291

tggatcgtattcgaatgtgggtcgtatcgtttgttcaaaacaatagcccgtattcgataacgggttcgatggatcgtttgttcaagacaatagaa  
cataacctcaaaccaaaactaaaaggatttaagttggaaaagctgaaaattgaaaaattcctaacaatttcacattaaattggcatttggactcaaaa  
gaataaaaaatctgttacaaaagaccggttctctcagatttctgaatttaattttgaggctatgtttatgtttgaaccaatcgatatcgataaatctcac  
ccgtttgatgtatgaAATACGATCCa

>MITE\_T\_27382

atggagaatttgcacgcaattttttattgcttcatctgaaagagcctaagtagctgagttcgcaatattttcataatttttctgacatgggaaattgg  
agaaaaattgatttaaaagtgagaaaatgtccgccttgacgtcatctggcggcatttctcatttaaacacatgtattttagaagatcaggttatttt  
gtcatatctcctctaataattgctcaatttatgaatcaagggtatcttcgtgttcagttcactcagaggattccacttaacaggaaattcatcaaatttc  
agacccttgcaaatttccat

>MITE\_T\_27426

TTACAGGGTgcctacaagtcggaattttcggcaagtcggaattttcggcaagtcggaataactactgatttttaaggggtgtccggaa  
gtactgaaaaagtgcggaagttccgcaaaaaggccggaatttttaattttgtcattttgtctcaattgcaaattttgaaattttctaatttcgtc  
aatggaggtactgaaaaagtacggaattttctgttgaggagggtactgaatttctagAGAATGTACTAAacaagtagtgaaaagtac  
ttattttgaccagcctgtcttagtagacaccctgtaa

>MITE\_T\_27552

atggagaatttgcacacaaaaatgttattgcttcatctgagagtgcctaagtagctgagttcgagttatcttgcgtatttttcgtaattttttgacatgggaaattg  
gagaaaaatagcgttaaaagtgagaaaatagccgccttgacgtcacctggcggcatttccatttaaacacatggattttagcagattagggtta  
tttggtcatattttatccaataattgtccaatttagaaaccgacgatcctcgtgctcagtttccagtagtatcattttaaagatgagattcaaaaattt  
cagacacttgcaaatttctctat

>MITE\_T\_27574

gagtccttcatagagagttaagacaacgcggctcatggatgtcacaacgggaataaagattacacaaattggacgtttttgtaatctttgatca  
accctttcccgaattcctatctcatttctctcatttcatttgtttttgcccGTGCTCCCAGAGACAACGTACTCCTAatgtc  
ccggtccattccagttataatctttgcaagtGGTGAAACCTTAAtccttattcccggtttgtgacacggtaaaggcctaaaatacgggaa  
ccaatcagaaatggattcgcattgtcttactctcagtataaagggactc

>MITE\_T\_27628

cgccgcacggagaaaaaaactcgtgcgtgggacccgaagtttaggtcatatggatctctgaagtttccagattgagcatctgaacacttttaggtc  
tagctgccgaagttcgggtcatacatctgaaactcagttcttacatctgaagtagtctcagatgtgagaaccgaagtacttcagatgtgagaactga  
agtttcagatgtgtgatccgaacctcgacagctagacctaaagtgttcagatgtcctaatctgaaaacttcagagatccatagacctaaactcggg  
tcccacgcacgagtttttttctcgtgcggg

>MITE\_T\_27722

ACAgagaatttgcatacaaatTTtaattgcttcatctgaaagtgcTtaaagagctgatttcacagtatttttacaattcttTCCAATATGG  
GAactagtataaaaatagattttaaagtgagaaaatgcacgcctagtgacgtcatctggcggattttccatttaaaccaacgtatttttagcagatt  
agatcattatgttatatcttctccaataattgttcaatttatgaatcaagggtatcctcgtgtttaattcactcagtagttccacttaacacgaaatttatca  
aactTCAGACACcagcaaattctctat

>MITE\_T\_27981

ACCCTTTCCACTCAGGTGTGCGAGCAGGACTCGACAAAATTGATTCAGGGGTTCGCTCA  
GGTGTGCGAGCTGTGCTCGACAAAGTTTCCGTCTCCCTCAATGCTCGGAAACAATGTAAA  
TAATGGCCATGGAAACCTGTGCTGCGCTCTCTGGTGACACTACATGGAACACTACTTGAGTC  
ACCtgagttcaaaatttcaccgctAGGTGTACCGGGGAGCCATCGCTCGTTTGCTCACCTCTTTGCC  
AATAACCTTTAATTTTCGGCCAAATTAAATCAGAGTTGGGGGCAGGTgaccttaaaaaaatttaagcgg  
AAAGGGT

>MITE\_T\_28153

cacggagaaaaaacctcgtgctggtgggacccgaagtttaggtcacatggatatctgaagtttccgattgagcatctgaacacttttaggtctagctg  
tcgaggttcggatcacacatctgaaacttcagttcatcagatgtgagaaccgaagttttcggatgtgaaatccgaagtacttcagatgtaagaact  
gaagtttcagatgtgtgatccgaacctcgacagctagacctaaagtgttcagatgtcaatccgaaaacttcagagatccataatacctaaactcg  
ggtcccacgcacgaagtttttctccgtg

>MITE\_T\_28355

gactagagtcctttatactgagagtcaagacaatgcgaatccatttctgattggtaaccggattttaggccttcttagtgtcacaacgggaataa  
agattacattttcaccgattgcaaagattataatctggaatggaccgaggaaatttcgggttcgacaaggaacaaacggaatgaaagaaggaaacg  
gagaaaggaatttaagaatgagccgatcagaGATTACGAAAgctgttcaatttctgtaatctttattcccgtttgcgactccatgaggggt  
gttctctgactctcagtataaagggactctacac

>MITE\_T\_28413

gagtccctttatactgaaagtTAAGACAACACAGTCAacacccccctcatggagtcacaaacgggaatgaagattacacaaattg  
gcagtttttctaattttgatcgggtcatttctcaaattcctttctccgttccttctctcattccgtttgttctctgtcgaccccgtaattcctcggtccatttca  
gatcataatctttgcaatcggcgaaaatgtaatctttattaccgtttgtgacactgtggaggcctaaattcggttaaccaatcagaaatggattcacat  
tgtcttaactctcagtgtaaagggactc

>MITE\_T\_28448

GAAGCGTATTTTCGATGATGATCGGTCAAGCCAAAATGCCGCGATAATGGCGGCAAGAT  
CATAATCGGATGGGTAAACATTTGAAGTTtagactttcaaaattgatgCTGATCGGATGCCATCATCTT  
CATCAGGTCATTTCTAAGCCGTACTTTTTTTTAGGATTATATTTTGGCTCCAACGTTTGCAA  
GAATTTACACCTTCTATCTCTCTGGTGAGTCCCGATGTTGGTCTTAAAAATTATGATCGCGT  
CAAAATAAAACACAACATCTTGTGATCCACCCATTTTGGCTCGACCaatcatcaacgaaaatacgctt

>MITE\_T\_28512

cacggagaaaaaaacttcgtgcatgggacccgaagttgaggtcatgtggatctctgaagtttccggtatctcgcatccaaaaacttcaggtccagct  
gccgaagttatGGTCAGACATCCgaagtacttaggtacataccgaagggttcgagtcacacatctgaagtatccgGTACCGGG  
TACATATCTGAGTACTTCAAATGtccgacccgaacttcggcagttgaacctcaagtttttgatgcgtgatccaaaaacttcag  
cgatccatgatgacctcaacttcggatcccagcacgaagtttttctccgtg

>MITE\_T\_29082

accaggggtgctacaagtccggaattgcagaaagtccgggaatagtactgatttttaagggcggtccggaataactgaaaaagtgcgacgA  
TTCCGCACAAGGTCCgaaattttgtcattttttgtcattttttcgtaacttgggcgagaaatttaatttttggaattttcgatttcgctcC  
ATTGAaggtaggtactgaaaaagtactgaattctcCTGTGGTGGAggaactgaatttctgggaatgtactgaaaaagcactgtaaa  
aatactgatttttgccagcttgtttattagacacctgt

>MITE\_T\_29516

AAACTCTcgtctgcaggccgattattgaaatttagtgtttgtcaggaggacatagatgacatgggttaaattggcgaggcggtgattggtcagc  
tacgtcttatcgctgctttgtcatgcctttgtcaggtggaatggacgacacaCTGtcagaaacttaagaggtgccgatAGCTTGtctgag  
ttcaaccgcacataggcagcagaaaagcagcgataagacatagccgaccaattaCGCTCaaccttttaacctatgtcatctatgtccgccTG  
ACAAACACAGaatgtcaataatcggccccgagatgcAGTTT

>MITE\_T\_29593

cacggagaaaaaaacttcgtgcatgggacctgaagtttaggtcatacggatctccaAAGTTTTTCGGACCACGCaacaaaaaact  
tgaggtccagttgccgaagttcgggtcagacatctgaagtacttctataggtatataccgaagggttcgggtcacacatctgaagtactcggttac  
ataccgaagtacttcaggtgtctgacctgaactttggcagttggacctcaagtttttgatgcgcgatccaaaaacttcagagatccatgatgacctc  
aacttcgggttccatgcacgaagtttttctccatg

>MITE\_T\_29840

cacggagaaaaaacttcgtgctgggacccgaagttgaggtcatatggatctctgaagtttttaggatcacgtatctaagaacttgaggtccaactg  
ccgaagttcgggtcagacatcgaggcacttcagTATGTACCGgggagacttcagatatgtgacccgaacccttcggtatgtatcgaagt  
acttcagatgtctgacccgaacttcggcaattggacctcaagtttttagatacgtgatccgcaaacttcagagatccatatgACCTCAAC  
ATCGGGTCCCgagcacgaagtttttctccgtg

>MITE\_T\_29896

catagagtcgtaatgtaagtgggtgagctggcgccacttttaagcattttccggGTCCTGAATACCGAGACGTTTGTGTTA  
Cgtgccgggtcacttttcgatacatgatcgattgttgcgatacacgggtacccggccatccgatgtgaacaaagaagatataggaatcaccac  
gtattccacaccgtcATTTTgaatcgaacatgtatcgaaaaagtgacccgaactcggcgcacaccgggctcggaactcgtcgagcagaac  
atggcaccagctcttccatttacattacgactctatgtactctatg

>MITE\_T\_29909

cacggagaaaaaacttcgtgtatggcaccgaagttgaggtcatatggatctctgaagttttcggtacacgcatccgaaaacttgaggtcgagc  
taccgaagttcgggtcagacatcgaggcacttcggttaagTACCgtaatacttcagatgtgtgacccgaacccttcggttaagtatcgaagtactt  
cagatgtctgacccgaacttcggcagctggacctcaagtttttagatacgtgatccgaaaacttcagagatccatatgacctcaacttcgggtccc  
accacgaagtttttctccgtg

>MITE\_T\_29929

TcaaggagagaaaaacttcgtgcatgggtcccgtagttgaggtcatatggatctctgaagttttcggtacacgcatccgaaaatttAAGGTC  
CAActgtcgaagttcgggtcagacatctgaggctctcggtatgtaccggagtacttcagatgtgtgacctggacccttcggtatataccgaagt  
ccttcagaagtctgacccgaacttcggcagttggacctcaagttttcggtatcgtgatccgaaaacttcagagatccatatgacctcaacttcgggt  
ctcatgcacggagtttttctccgtga

>MITE\_T\_29952

AACATAAGGTTCGATAGACCCAGGTCAGTCCGTCAGAAAATTTGAGTGTGATAATCTTTGC  
AAATCAGGGGTGAGGGCTGTCTGCATTGCCATCAGATTCCCGCGATTGTGCCACTCTGC  
TGTTCCCCGTTCCAATTACATTGGTCTTATGCAGATCAGGGAGATTGTAGCGGAACATATGT  
AATGGGGCACCGCAAACGTAAATCGGGGAAACTTTGGAGTGGAATAGCAGATCGGGGG  
CATTCGTTGCCAGATCCAGAAATCCCAAAGAACATCTTGCTAACAGATTGACCTGGGTCT  
TTCGACCATGAT

>MITE\_T\_30037

cacggagaaaaaacttcgtacatgagacccgaagttgaggtcatatggatctctgaagttttctgatcacgcatccgaaaacttgaggtccaact  
gccgaagttcgggtcagacatctgaagctcttggtatgtaccggagtggttcagatgtgtgacctgaacccttcAGTTTATaatgaagtacttc  
agaagtctgacccgaacttcggcagctggacctcaagttcttagatacgtgatccaaaacttcagagaaccATATGACCTCCACTT  
CTGGTCCCcatgcacgaagtttttctccgtg

>MITE\_T\_30050

tttatgccgcaatcacacgctgaatttagcagccgaatgtggaagtcaacagtcacgcccacggctgaaatttcgcaaattcgagttatttcat  
ccagatgtgtatcaaatctactcgaatgttcagacaaatccaacattagtcgatgggtgctgagaatcgttgctggattttgcgcgtcacgccgc  
gcaaattcaggtcatcgacACACATGACACTCCACATGACTTCGATGACttcgtatgacttcacattcaagccacatt  
cagctctcacattcagcgtgtgattgcggcatgacaa

>MITE\_T\_30063

cacggagaaaaaacttcgtgcatgggacccgaagttgaggtcatatggatctctgaagttttctgatcacgctccgaaaacttgaggtcgag  
ctgccaaagttcgggtcagacatcgaggcacttcggtatgtaccggagtacttcagatgtgtgacccgaacccttcggtgtatatcgaagtactta  
agatgtctgacccgaacttcggcagctcgacctcaagttttcgatacgtgatccgaaaacttcagagatccatatgacctcaacttcgggtcccat  
gcacgaagtttttctccgtg

>MITE\_T\_30098

cactgaaaaaaaagtttggtaaatccgaactagtttaggatcatatggaaccacgattttgttcgggtgcacacgaccgaattattcgggtcgtc  
gccgaactgttcgggtcactgaacaaactgtaagaatttattatgggtcggtcgcacaaaccgaacaattcgggtcgcacaaaccgaacaattc  
gtcgcacaaaccgaacaattcgggtgaacagaccgaataattcgggtgtgtatccgaacaaacctgggtccatatgatccttaTTAGTttgg  
attaccgaacttttttccgtg

>MITE\_T\_30132

cacggggaaaaaacttagtgcgtgggacccgaagttgaagtcatatggatatctgaagttttcggtacacgtatctaaaaacttgaggtccagct  
gccgaagttcgggtcagacatctgaagtacttcgatatgtaccgaagggttcgggtcacacatctgaagtactccggtacatccgaagtgcctc  
gaagtcatgacccgaacttcggcagctcgacctcaagtattcggatgcgtgatcagaaaacttcagagctcCATATGACCTcgacttcgg  
gtcccatgcacgaagtttttctccgtg

>MITE\_T\_30156

gagtacatagagtcgtaatgtacatgggagagctggcgccacttttaagcattttccagggtcccgaattccgagactcctgtgtcacaccgggtca  
cttttcgatacataatcgattgttttcgatacacggggactCGCCCATCTGATGTAAACGAAGAGGAtaggaattactacgt  
attctacatcgccattttggatcgaaaatgtatcgaaaaagtaccgagggtcggcgcacaccgggctcggaactgttgaccagaacatggcg  
ccagctcccCATTTACGTTACGGCTCTATGTTCTC

>MITE\_T\_30170

cacagagaaaaaaattcgagcgtggaaactcgaagttgaggtcatatggatctctgaagttttcggatcaagtacctaataaacttgaggtcgagct  
gccgaagttcgggtcagacatctgaagtacttcgatataaccgaagggttcgggtcacacatctgaagtactccggcacataccgaagtgcctc  
gatgtctgacccgaacttcggcagctcgacctcaagttttccgatgcgtgatcagaaaacttcagagattcatatgacctcaacaTCGGGTcc  
tatgcacgaagttttttctccgtg

>MITE\_T\_30188

cacggagaaaaaaacttcgtgtatgggacccgaagttgaggtcatgtggatctctgaagttttcggatctcgcatccgaaaacttgaggtccaact  
gccgaagttcgggtcagacatctaaaGCTCTCGGTATGCACCGgggttacttcagatgtgtgccCTGAACCcctcggtatata  
tcgaagtacttcagaagtctgacccgaacttcggcagttggacctctagttttcggatgcgtgatccagaaacttcagagatccatatgacctcaac  
ttcgggtccccatggacgaagttttttctccgtg

>MITE\_T\_30254

cacggagaaaaaaactttgtgcatgggacccgaagttgaggtcatatggatctctgaagttttctgatcacgcatccgaaaacttgaggtcgagct  
gccgaagttcgggtcagacatcgaggcacttcggatgtaccggagtgcttcagatgtgtgacgcgaacccttcgggtatacatcgaaagtatttca  
gatgtgtgacccgaacttcggcagctcgacctcaagtttttagatacgtgatccgaaaactttagagatccatttgcctcaacttcaggtccactc  
acgaagttttttctcagtg

>MITE\_T\_30260

TGTGAGCTGGACACGGGCTTAGCTctatagagtacatagagtagtactgtaagtgggagagctggcgccattttctgctcg  
acgagttccgagcccggtgtgctgggggtcatttttcgatacatattcaaCCCTTTGCTGtgtggaatatggccgggtccccgtgtatcgca  
aacaatcgattatgtatcgaaaaagggaacccggcgccgcacaggaatctcggaattcggaacctggaaaatgcttaaaagtggcgccagctcc  
cccacttgcattacgactctatgtactctatgtctcaGCTCACA

>MITE\_T\_30522

GAggtcctttatactgagagttaagacaatttgaatccatttccgatttggttacgtatttttGCCTCCACAGtgccacaaacgggaata  
aagattacattttcaccgattgcaaatattataatctggaatggaccgcaGAATTACGGGTTtacaaggaacaaacggaatgagagaa  
ggaacggagaaaaggaatttgagaatgagccgatcaaagattacgaaaaacgttcaatttgtgaatctttatttctgttgtgactccatgaggggg  
tgttggttTAACCTCTgaataaagggactc

>MITE\_T\_30781

cacggagaaaaaacttcgtgcatgggacccgaagttgaggtcatatggatctctgaacttttcggatcacgcatccaaaaacttgaggtccaactc  
cCGAAGTtgggggtcagacatctgaagtacttaggtatgtcccggaaacttcagatatgtatgacccgaaccttcggatgtacctaagtact  
tcaaatgtctgacccgaacttcggtagacctcaagttttcggatgcgagatccgaaaactttagagatccatatgacctcaacttcgggtcccatgc  
acgaagttttttctccgtg

>MITE\_T\_31021

ccagggtgtctacaagtccggaatttcgggaaagtccagaaaaagtactgatttttatggGCGGCCCGGACGTACagagaaaagtg  
cggaaattccgcaagaagggtccggaatttttgaattttgtcgaatttgagcgagaaattcaaattttggaaattttcgaatcgGTCAAtcg  
gaggcactgaaaaatactgaatttttctattgaagaggtactgaatttcttaggaatgactgaaaaagtactgtaaaagtactacttttggctagc  
ctgttttagtagacacctgg

>MITE\_T\_31187

agccctggatagacgatcaaattccgaaccaattccgatcaaagtagacatgctgatgactgggtggtggtggtcaccatctaccatcaaactttga  
cgggccgcactttttgttcaaagtaagatcagaacggagtgccgcaccattcatcatttctgccacaggccacaggaaaactttctgccaagttt  
tcattttaaaatgaagcaaattaatgagtttaagactgatgactcccgcactttgatgctactttgatcggaattggttcgggacttcgatcgtctatc  
cagggtcta

>MITE\_T\_31599

cagggtgtctagttttttccactttgggaaatcctgattttcctgagttttgaCTACTAAAacctgatttcaaaacttttccaaatcctgatttt  
tgcggagaaaaattaaaatttcagcataagcgtatgcgaaagcacaAAAAATCCGATGGGACAGCCGACTgtgtctcaa  
atcctgattttacgatcgatttttctcgaatcctgatgaaatcgggattaaatcctaattaacctcaaattctgatagaatcgggaaaatctggaaaat  
cctgatgctagacacctg

>MITE\_T\_31975

cagggtgtctacaagtccggaatttccgaaagtccggaatagtactgttttttaagggcggtccggaagtactgaaaaagtgcggaattccgc  
aaaagggtccggaattttttttttgtcattttgtcgcaatttcgaattttgaaatttttctaattttatcaaatgaaggtagtgaaggtacggaattttct  
gttgaggaggttctgaatttcttgagaatgtactgaaaaagtactgtaaaagcacttttttgaccagcctgttttagtagacacacctg

>MITE\_T\_31980

agggaaaatgttaagtatttgcctcaaaatttctggagaaatgggcctgtgcatgcaagagatacagccgcgcaatagacttttagagggttaa  
tgacacgaaaattacgatgggtcacattaaaaaagtctgaaatacactccttactgtgcaatttgcgttgtcaggaacgcgcttttcaaatttccgcg  
tctgggggagtttctaatacccggaacgagcgaacggcggtcgtgatttccggaagatgccgagtcgttgtgtgtgttatttttcttc  
agtttgtttacaacccaacgtgatctctatagtgggtccatatacgtttatgcggtacaaaatcgatcaacttttaaatattcaacgcaatccttca  
catttcatttcacgatgtcacgagctccgatttttaggttatgtgtcagttttagtgaccggaaatagccgcgagttgccgttaattgttccgttaga  
aaactgccccagatgcgttaaatgtgaaaaagcgcggttctaacaacacaaattgcgcagtaaggagtgtatttcagactttttaatgtgaccatc  
gtaatttctgtgtcatttaacctctaaaaagtctatttcgcacggctgtatctctcgcatgcaacaggcccattatttcGTAATCTgatttaaagtgt  
ctgaaaatttcattgaaataaattcatatttttctcaaaaataagcgTTCTCTGAGgataaatgtggcaacattcgaatgttctacggcgttt  
ccct

>MITE\_T\_32206

GACTGATATAGTATGACTACGTCATTCgggtataatatgaactcttgggtcaaaccacaaacaaactaacataacctcatgta  
caAATTCTTCTAGAGTTAATTTTGCgttactttataaaatttagtcattgaccgggtGTAAATCTATTAAGGAC  
TCATGAAACACGAGGAATTTTCGATTGtgagaaacacttggacgcattttaccagcATGGCGCAAAGGGCG  
CGAATTAGAAACAAGGTTGTGCGTTTGTTCACTTTTGAacatgacgtagccactaaatcagtc

>MITE\_T\_32210

atcagggtgtctagcatcaggaaaaaccggaaaatatcaggaattttggccgatcaggaaaaatatcaggaaaatcgtaaaaatcggacgttttgc  
caggaatttttctacgcaaatctctcagcggagaaagtcttactgcttttgcgttaccgtgccaggagtcgagaaaaatcaggaaaatatcagga  
cttttcaaatgaaaaatcaggaatttttataaaatatcaggtaaaatcaggaaattatcaggatttttcaaaatataactagacacctgt

>MITE\_T\_32311

TCGACGGGACGACGGCGTAAATCCGcaaccacatatcgacggtgaaactaccaaccacgtatctcggttgcgacgt  
cgcagacttctgtcatactttatttttaaatgaaaaactacttaacgtccagtcctgaaaatttctgtgattttctcttcgtgcggagaaaattctgtg  
aaaatttcaaggaatgatattgatttggctacttcaaaaaataaaatgcgagcgtagatttttaaacaccgcaaacgagatacgtggttggtagtt  
tcaccgtcga

>MITE\_T\_32507

GTCAGAGAATGAAATGCCATTtttatttggacggagttaaacagaaaggaaccaagccacatcgggatcgaaccaagaaaa  
agagggttaaagtttggctctcgtaagactcaatgtaaagataaaactcaagttctgtttctgcaaaatttgcctcaacaaaaacttgaattttg  
gcgatagatagtagcagtggttgagttcaaaaccactcataactcaatttttccaaatgtgggttggttcttctgcttaactcagtcatttca  
TACTCTAAC

>MITE\_T\_32554

ctcatatcactagaatatcgacggtgaaactaccaaccacgtatctcggttgcgacgtcgcagacttctgtcatactttatttttaaatgaaaa  
ctactttacGTCCAGTCTTAAACAttctgtgattttctcttcgtgcggagaaaattctgtgaaaatttcaaggaatgatattgatttgg  
tctacttcaaaaaataaaatgtgagcgtagatttttaaacaccgcaaacgagatacgtggttggtagtttcaccgtcgataatcTACTcctaag  
ag

>MITE\_T\_32729

tTTGGAGCGCgtttaatagaaaggaaccaagctacatcggATGTTGCCACATTAAACtgagggtatttaattttctacaagag  
aatatttgtgcaatttttgcgaaaattttaggggatctGCCTTgtaacatgcagaaaattcactgaaattttcaacaaatccgcttcaccgttttc  
atgtaataaattaaattgccagctaaactttgcaatggctgatgtggcttggttcttctgcttaacgcggtctatTGGCAATATTGggc  
ttaacgtggtccaaa

>MITE\_T\_32737

tcgacgggtgaaactaccaaccacgtatctcggttgcgacgtcgcgtcgcagacttctgtcatactttatttttaaatgaaaaactactttacatcc  
agccttgaaaatttctgtgattttctcttctgtgcggagaaaattccgtgaaaatttcaaggaatgatattgatttggctacttcaaaaaataaaatgt  
gagcgtagatttttaaacaccgcaaacgagatacgtggttggtagtttcaccgtcgatatttttatactttatagcCGTCGA

>MITE\_T\_32749

taggcctggatacacgctcaaattttctgaattttcgatcaaaatgatgacaaaatggcggtcgagagttatctaaatTGCTATCCATAA  
TTAACTGAAACAACGTGTTGATGGAAATACGCATGAAATGAGCACAGTCGTGTAGAAAT  
CAGATGACGGATAgagaccacagttccatcatctaccatcaaattttgcaggccgcaaaaaatcgatagtagatgggtgcgcaccagt  
caccatttgatcggaaattgggtgaaatttaagcgtgtatccaggcctt

>MITE\_T\_32762



tcgcgataaattgccacactgagaaaaaagttcggtaaattccgaactagtttggttcatatggaaccaagattttgttcggtacacacgaccgaat  
tatttggctgctcagccgaacttttcgggtccactgaaccgaactgtaattgttcggtgcacaaaccgaacaattcggttgaacagaccgaataatt  
cggttggtgtgtaccgaacaaaatcgtgggtccataagatccaaactagttcggatttaccgaactttttgcTCAGTGcggatataatcgca  
>MITE\_T\_32885

atggcctgggttacacgctcaaatttccgtcaaattccgatcaaaatgatgaccaagatggcggtcgagagttagattggtgagtaaaattaatt  
aaaacagcgtgttgattgaaataagcacgaaataagcacgggtgtgtggaaatcagatgaaggatgagccccacagctccatcatctaccatca  
aattttgcaggccgcagaaatttgatggtagatgggtgcgcaccagtcaacatttgatcggaattgatggaaattgagcgtgtaaccagcgcA  
T  
>MITE\_T\_32972

gagaaaaaaaaggaggtgtttgcattttgggcatcttggaaatttttgatgacgtaggtcgggtacggcgacttttatcatcaattttcttgaaatgggtg  
tagtttatggaaaaatgcattctacataaggtgtttgaaattatatcaggAGTcattaagcaaaaaaatcggacattatggtccgttttcatact  
tcgaattccagatttgcgtggccaggtgtaccgacttACGTCAcAgagtaaacaaacctcaagatgcaaacacctccttttttcgc  
>MITE\_T\_33004

CACGGAGATAAAAAGCACGGTTCTTCGACGGTTAcacggtagtaatgtcacacgtGATTCCACGGTA  
TAGTAGAACCGTGCAATTTTGGAAgattattgatgacacagtAACAGAACCATGTTCTGTGGTAGCAT  
TATTGTGCTCACAGTAATATTAGAATAAACACGGTAACAGCACCGTGCTCATCATTACAG  
TCATCAAAATCGACCGTTCTATACTACCGTGGATTCTGTGTGACATTACTACTGTGGTAA  
CCGTCTGaaaaaccgtgtttttttctcggtg  
>MITE\_T\_33027

AAGCCCTGGacagacgatcaaattcccgaaccaattccgatctaagtagcatcaaagtgtcgggagtcacagccttaaactcattaatt  
gcttcattttaaatgaaaacttggcagaaatgttctgtggcaggaaatgatgaatagtggcactcattctgatcttacttgaacaaatgagtgc  
ggcccgtaaaatttgatggtagatggtagaccatcagtcacgatgtctccttgatcggaattggttcggaatttgatcgtctatccagggctt  
>MITE\_T\_33258

aaaccagcgggcccattattgaaattgatagacaaagccatagacaaagaagacaaaagagatatggagggatcattttggtgaaagcgggtg  
gttgcaatggacaaaggagaaagtaatagactaactaacggcaaccacgagggaccgatagtttagtccatcattttctccctagtctatag  
gaaccacccatttcgaccaataggatagctccatgcTCCCTAAGTAatccttgctatcgcttcgtctatcaatttcaataatcagcccgcat  
gGCTC  
>MITE\_T\_33617

tggcctgggttacacgctcaaatttccgtcaaattccgatcaaaatgatgaccaagatgacggtcgagagttagattatgagtaaaattaatta  
aaacagcatgttgattgaaataagcatgaaataagcacgggtgtgtggaaatcagatgacggatgagccctacagtccatcatctaccatcaaat  
tttgcaggccgcagaaatttgatggtagatgggtgcacaccagtcaccatttgatcggaattgatgggaatttgagcgtgtaactagcaca  
>MITE\_T\_33687

ACTCACagagaattggattgcattttgaaaaaggaaccactagcattgcaatgttgctaagattgtgcaactctttgtcttgaggaaaaac  
ccgattatcccttaatacttcttatttactcgtaaaaactgtaaatgaacaaaaattaccatctgaatttctagttttcacaatttccgcaatttat  
tgcaaaggatgaagttgcacaatcttaggggtcattgcaatgctagtgggtccttttgcaaaatgcaatccaatttgatagagt  
>MITE\_T\_34113

gagaaagaaaaggaggtgtttgcatttcgggcatcttgaaTGACGTAGGTCCGTTTAAcagagttagcatcgattttcttgaaatt  
gtgtaatttatggaaaaagtcattctacaaaaagtgcttgaaattgaTGAGTttagtgagttgattgaacaaaaaaatcggacattatgggtc  
cgttttcactatttgcaTTCGcgtttcgtggccaggtgtaccgacctacgtcacagggtaaacaaacctcaagatgcaaacacttctttt  
ttctc  
>MITE\_T\_34248

TCgccggtgaaagtccgcaatcacataacgacggtgaaactacaaaccacgtatctcgtttgcgggtgttaaaaaatctacgctcgcattttat  
ttgaaatgacaaaatcaatatcattccttgaaattttcacagaattttctccgcacgaagaggaaaaatcacagaattttcaagactggacgttg  
agtagttttcatttaaaaaataaagtatgacaggaagtctgcgacgtcgaaaccgagatacgtggttggttagttcaccgtcga  
>MITE\_T\_34657

TTTCATcattcatatcgacggtgaaactcccaaaccacgtatctcgtttgcgggtgttaaaaaatctccgctcctatcattactttttctgacagca  
aatcaacatcatttcgtgaagttttcacagaattttcttgacagaatagaaaaatcacagatattttaagaatgtacgttgagttgttttcttcaaa  
aaataaagtatgacagtaagtctgcaacgttgcaaacgagatacgtggttggaatttcaccgtcgatatgcagagacaa  
>MITE\_T\_34678

tcgacggtgaaattacaaaccacgtatctcgtttgcgggtgttaaaaaatctacgctcgcattttatttttgaaatagacaaaatcaatatcattactg  
aaattttcacggaattttcttcgcacgaagaggaaaaatcacagaatttcaagactggaaattaagtagttttcatttaaaaaataaagtatgaca  
ggaagtctgcgacgtcgaaaccgagatacgtggttggttagtttcaccatcgatatgtgattgccgacttacaccgtcga

>MITE\_T\_34718

tcgacggtgaaactaccaaaccacgtatctatgtttgcgacgtcgagacttctgtcatactttatTTTTAAATGAAAACTACTTAACATCCAGTCTT  
GAAAAATTTCTGTGATTTTCTCTTTGTGCGGAGAAAAATCCGTGAAAAATTCAGGAATGATATTGATTTGGTCTACTTCAAAAAATAAAATGTGAGCG  
TAGATTTTAAACACCGCAAACGAGATACGTGGTTGGTAGTTTACCCTCGATATGTGATTGCGGATTACACCGTCGA

>MITE\_T\_34733

tcgacggcgtaagtcgcaatcacacatcgacggtgaaactaccaaaccacgtatctcggttgcgacgtcgagacttctgtcatactttatTTTT  
TAAATGAAAACTACTTAACATTTAGTCTTGAAATGTCTGTGATTTTCTCTTTGTGCGGAGAAAAATCCGTGAAAAATTCAGGAATGATATTGATTTG  
GTCTACTTCAAAAAATAAAATGTGAGCGTAGATTTTAAACACCGCAAACGAGATACGTGGTTGGTAGTTTACCCTCGA

>MITE\_T\_34760

TCGATGGTGGAACTCTCgaaccacatatcgacggtgaaactaccaaaccacgtatctcggttgcgacgtcgagacttctgtc  
atactttatTTTTAAATGAAAACTACTTAACATCCAGTCTTGAAAAATTTCTGTGATTTTCTCTTTGTGCGGAGAAAAATCCGTGAAAAATTCAGGAAT  
GATATTGATTTGGTCTACTTCAAAAAATAAAATGTGAGCGTAGATTTTAAACACCGCAAACGAGATACGTGGTTGGTAGTTTACCCTCGA

>MITE\_T\_36058

GTccatcaaatggattgcattttgcaaaagaggaaccgagagcattccaatgttgctgggattgtgcaacatacatttttgcaataaactctctga  
aataatgaaaacaatcaaatttcaaaaggaatttcgtcttgaattcatagtttattagagtaaagataaaactgtattgatgatcagtttatatttgca  
gggcaaaaaaagttgcacaatcttagcgacattggaatgctcctgcttcttttgcaaaatgcaatccaatgatGAC

>MITE\_T\_36070

ATAGtagaatcagtgagaacaaaaacacaccaactcgaaaaaatgaaataatcaagacgcacacaaaacttcacagtaggtgaagaagtt  
agtctgagaaaaagattttggcgagagACAAGCCtcaaggacactttaagggtccaagttgaaaCAGATGCGGTAAC  
TGCAATGACCTTTTTGTTGTTGTCTTTGACATTGGCTGTTTGTAAATACGAATTGAGCATT  
TTGTGTTAccgagttggcgtgtttcgttctcactgattcaattat

>MITE\_T\_36077

GTTACATctacagtctgccgtgctaaggaggaacgccgtatgaacattcgagagttgccaaatttcctcgataaaacatgcattttgaca  
acatccatgcctattttcccttgaaatttcaggtaatttagattaaattgcgtacaaaattgtctgaaaattttggaaaataatgcataatttcctagg  
aatttcggttttatcagaggaacttggaacatctgaaggctcatacggcgttcttcttagcggGCGAGAATTGTTGTAAC

>MITE\_T\_36175

tagatcgtattcgatacatcaaacgggtgagattgtatcgatcgtattgggtcaaaacataaacatagcctcaaaagtataATTTCAGgaatct  
gagagaacgggtcttttgtaacagattttcattcttttgatcacaaatgccaatgcaaagtgaattgtcaggaaatttctcatttcagcttttcaa  
cttaaatccttacactttgggttgaggttatgttctattgtttgaaccaaaccacacatcgaaccgttatcgaatacgggtcca

>MITE\_T\_36233

atcagcgggccgattattgaaactgatagacaaagctatagacaaagacgacagaagggatttgagggtcctattgggtggaagcaggtgggt  
ggcaatggacataggaggttaggtaatggactagctaacggcaaccacgagaaacctgacagttagtcacatcttctccttagtctatgaga  
accacacatttcaaccagtaggatcgctccataccccctatgtcttcttctatagctttgtctataaatttcaataatcggcccgctgt

>MITE\_T\_36345

tggatcgtattcaatacatcaaacaggtgagattgtatcgatcgtattgggtcaacatgtaagcatagcctcaaaagtcaataaagtaattctgagga  
aacgggtTGTTTGAGATAGATTTTGTCTTCTTATGAGTACaatggcaatgaaaagtgaattattgGGAAC  
TTTCTCATTTCTcggctttccaactaaatcctagaattttgtttgaggttaccttcattgtttgaaccaaacaatacatcgaaccattattg  
aatac gatcta

>MITE\_T\_36406

attgaatcagtgagatcgaaaacacaccgactcggttaactcgaaaatgctcaattttcattaaagacgggtcaattcttataaagggtcattgaagttag  
ctcatctgttccaacttgacctttaaagtgccttaagtgtgtatttcagcaccaaaaaatcttttcttagactaatttcttcatcttgcACTCTTT  
CTCTCTACTGTGTAGATTTTGTATGTCTTGATTACTTTCCTTtttctgagttggtgtgtttcgttctcactgatt  
caat

>MITE\_T\_36560

TTGATCGTATTCGATTGTGATTCGGTGTatcatttgggtcaaaacaatagaacatagcctcaaaccaaaattgtaagatattt  
gtcagaaaaagctgaaaatgagaaatttcgaagCAATTTCACTATTCTTGGCCAAGTAgtaactcatacgaatcaaaaaatcga  
tcacaaaaaacccgtccCGTCAggttactcaattgacttttaaggctatgtttatgtttgaaccaatcgatcgcataaatctcaccctgttgat  
gtatcaaatc gatcta

>MITE\_T\_36771

TAgctcaaatgaatcagtgagaacgaaaacacaccaactcgaaaaatgaaaagaatcaaggCACACATGAAACCgaacagta  
aatgaagaaattagtctaagaaagagattttgggtgccgaaatacagcacttaagggcattttaagggtataagttggaacagatgcactaacttc

aatgactttcataaaaattgaccgtctcttatgaaaattgagcaattccgagttaccgagttgggtgtgttttcgaactcaccgaTTCAAATGT  
Gcga  
>MITE\_T\_37049  
AAggcctcgatacacgatcaaatttctGAACCaattaacatcaaaatgtcgggagtcacagtcttaaaatcgtaCCTCGCCTAAT  
TTTCAAACGAAATCCTGGCAGAAGTGATTCTGTgtggcaagaaatgatgaattgtggcactccattctgatcaaaatt  
ggacggccTGTCCAATTTTGTTCAAAGAGGACTGTTGAATGGTGACCATCGGTCATTatttgggtcta  
ctttgatcgggaattgcttcggaattgatcgtgtatcgagacctt  
>MITE\_T\_37164  
attgaatcagtgagaacgaaaacacaccaactcggaaaaatgaaaataatcaagacacacacaaaaactgcacagtaggtgaagaagtacttta  
aaaaaaagatttttgcgtcgaAAGACAGGTACTTATAGACACTATAAAGGTTCAAGTTCGAACAGAT  
GTGCTAACTTCAACAACCTTTATGTAAATaaactgtctttaatggaagTTGAGCTGGAAGTAACAAT  
GGAATCGagttttcagtggtgtgttttcgttctcactgattcaat  
>MITE\_T\_37228  
aagccctggatagacgattaaattccgaaccaattccgatcaaagtagacatgctgatgactgatagtcaccatctaccatcaaattttgacgggc  
cgactattttgtcaaagtaagattaGAATAGAGTGCCactattcatcatttctgcctcaggaaactattttgccaagttttcattttaaaa  
ctaagcaaattgatgagtttaagactgatgactcccgcacactttgatggtaattgggtcgggaatttgatcgtctatcgagactt  
>MITE\_T\_37330  
cacggaaaaaagtgtcaggggttatctcATAAAATTGTcgcactaccccaatttgtggatgatatggacgtTCCAATTCATTT  
TGGTAGTGTCTCGatctcaagttggggtagatcGCAACATTTAGGTTAGTAGCCCAATTTATTGGGATA  
GTATCATAATGAATTGGGGTAATACCACCTTTTAATTGGGGTAATAcaacaattttagaaaattggaacg  
tccatatcatccaacagttgggacttaacccctacctctttttccgtg  
>MITE\_T\_37627  
ATTGAATCAGcgaaaacaaaaacacaccatGCAACTACCAACTTGGTAcctcgaaaatgctcattttcactatggaca  
gacaattttcataaagtcattgaagttaccgtatctgttccaactggacatttaaagtttcctaagtagtctgttttaggcataaaaaatattttcttaa  
actaacttctcacctaatatgcagttGTGTGTGTatcttgattactttcatttttgcagtttgtgtgttttcattctcactgattcaat  
>MITE\_T\_37676  
GAAAcattcgacggtgtaagtcggcaatcacataactcgtttgcggtgcctgaaaatctccgcctctatgtatttttttaaaggagaacaaatt  
gacatcattccttgaagttttgcagaattttccttgcacggagaagaaaaatcacggcagtttagagaattgccgttgagtagtttccggttaaaaa  
ataaagtatgacagggagtcgacgctgcgaaccgagttatgtgattgccgactacaacgTCGATACGTGTATC  
>MITE\_T\_37826  
CGGtctatatactgccgtgctaaggaagaacgccgtatgagccttcagacgttgccaagtttctccgataaaaaaccgaaatcaccgggaaaa  
ttgtgaatattattctcaaaaatttcagataattctgtatgcaattaatctaaaatatctgaaaattcaaggaaaaacatgcataaatgtgtcaaaaa  
tatgtgttttatggagggaaatttggcaactctcgtatgtacatacagcgttcttcttagcacggcagtatatatacg  
>MITE\_T\_37854  
ccgccgtgctaaggaagaacaccgtatgaacattcgagagttgccaaatttccttgataaaacatctATTAATGATTGATAAACat  
cattttgacgacattcatgcacatttttcttgaagtttccagatatttagattaaattccgtacgaaattgtctgaagattttggaaaaaaatattcaca  
tttcccagtgaaattcagttttattgaaggaaatttggcaacgctgaaggctcatgcggcgttcttcttagcacagctg  
>MITE\_T\_37982  
caattggattgcattttgcaaaaaggaatcagaagaattgcaatgatgctaaagctaagattgtgcattttcatcatttgcaatgaaattactgaaact  
atgaaaaaatatgaaattactaggtaattttgcctaaatttacagtttttagcgagtaaaatagaaactgttagggatagtcagggttttctccaag  
acaaaagaagctgcacaaatcttagcaacattgcaatgctcctggctccttttgcaaaatgcaatccgtttG  
>MITE\_T\_38000  
cactggtaaaaaaacctcttggttaagagtcagtttctgtcgccgatttaagaatctggactcttgtttcaatgcaaaatccgcttgaatcga  
TGCAAAATCCGcgtgaatcaatgcaaaatccgttgaatcaatgcaaaatccgcttgaatcaatgcaaaatccgcttgaacaagagttc  
aagactcttaaatccggcgacaagaaactgcactcttaagtcaatgcaatgcggcattgggtccaagaggtttctTTTGCCAGTG  
>MITE\_T\_38178  
CACGgataaaaaagtgtcaggggttatcccctaaagtGTGGTACCTACTacccaaatttgttgatgatgatgatgatggacatt  
tctaattaattttatttagtaccgcaactcaaattagggtagtgcgcaacatttgggttagttacctaatttattgggttaccaccataattaattgggggt  
gtaccataattaaccgggttactaccacaattaatggagatgtccatatcatccaacaacctcgtcttttttccgtg  
>MITE\_T\_38473

aatgcatatcgacggtgaaactaccaaaccacgtatctcggtgttgaaaatctccgctcacattttatcttgaagaagaccagatcaat  
atcattccttgaaatctcacagagttttctacacgaagaggaaaaatcatggaagtttcaagaactgacgttgagtggttttcataTAAGaa  
gtgaagtatgacaggaagtctacaacgtcgaaaccgagatacgtggttggtagtttcaccgccgatGACATT  
>MITE\_T\_38687  
tcatatggattgtatcttgcacaaaggaaccaagagaattccaatgttgctaaagtaattgtgcaactttttatcttgaagtataaactgatcattta  
acaagttttatcttactccaataaaatgatatttaagacgaaaattaccttcgtaaattgaatttctgctgatttcagtaacttttgcggaatgt  
aagttgtacaatcctatagcaacattggaatgctctgttgcctttgcacaaatgcaatccatata  
>MITE\_T\_38690  
aacacaattgaatcagtgagaacgaaaacacaccaattcggTATCTCGAAAATAGTTAAGTTTTATTAAAGACAG  
TCAGTTTTTCATGAAGCTCATTGatgtagcgcatctgttccaatttGGACCTTTTGTCTTTGACTACTTGT  
GTTTCGGCACCAAACACTTTTTCTTTGACTGACTCCTTCgcttactgtgcagtttgtgtgtcttgattttt  
catttttcgagttggtgtgtttcgttctcactgattcaattgtgtT  
>MITE\_T\_38779  
cactggaaaaaaaaaaaaacattggatctagagtcagactctaaaaacatcgacaagaaaaaactcatgattcaatcagatttaagctta  
aatcaagaaccaagcctctaatttgagcggatttcttttgatttaagcttaaatctgattgaatcaagagtccttttctgtcaatgtttcaagagct  
ggactctcttttctgtcaatgtttcaagagctcggactctgatccaatgtgtttttttccagtg  
>MITE\_T\_39066  
catgtcgacggtgtaagtcggcaatcacataactcggtttgcaatgttgagatttctgtcactttatcttcaaacggaaaactactcaacggca  
tttctttaaactgccgtatttttctcagtgcgaaagaaagctgcataaactcaactcaaggaatgatgtcaatttctccttaaaaaataa  
catggaggcggagcttttcagacaccgcaaacgagatatgtgattgaggacttacgtcGCGTCGTCGATG  
>MITE\_T\_39114  
tcgacggtgtaagtcggcatttcggcaatcacataactcgatttgcgacgtcgagacttctgtcacacgttatttttaaacggaaaactactcaa  
cggcaactctttaaactttcgtgatttttctccctgtgcgaagaaaattctcataaactcaaggaatgatcaatttgttctctttaaataaac  
acagaggcggagattttcagacaccgcaaacgagttatgtgattgccgaatgccgacttacaccgtcga  
>MITE\_T\_39135  
tgggcaatactgccgtgctaaggaagaacgccgtatgaaccttcgagagttgccaaattccattgataaactaTGTATTTCTGAaggaca  
ttcatgcatatttccccttgaaatttcagatattttagattaaattgcgtacaaaattgtctgaagatTTTGGAACCAATATACGCA  
AATTTCCActaaattcggttttatcgaggaaacttggcaacgtctgagggtcatacggcgttttccttagcacggcagcattgcccA  
>MITE\_T\_39203  
TtctcatttgaatcagtgagaacgaaaacacaccaactcgaaaaaatgaagataatcAAGACACGCGCAAAACTACACAG  
TAGTTGAAAAAGTTAGcgcaagaaaaagattttggtgccgagagACGAGTGcttgacactttaaagggtcaagttggaa  
cagatacgtcaacttcaatgaccttttGAAACTGACTCTCATACatgaaaattgagtattttgagatcgagttgatgtgtttcgttc  
tactgattcatttgagaT  
>MITE\_T\_39370  
ATTAAGGGGactggaggacaaagcgcgatgaagtgaattttcaaaaaattgagatattctgaactcaactaaaactagtttgaaagtata  
ttctgtgaaaaattcacaactaaaatccaactttaagcatcaaaatgtgagttgAAACTTCCTTTCCACcaaaggctccatgaatttt  
gaaactttaaacatgttCTTAGGTACGAGTATTccctaaaatagcaaaaactgcacttatatgcacctgtcctccaagcccctcaat  
>MITE\_T\_39559  
cacggagaaaaaaactcgtgcgtgggacccgaagttgaggtcatatggatctctgaagtttccggatcacgtatctaaaaacttgaggttcagct  
gccaaagttcgggtcagacatctgaagcactccggtacataccgaagttcctcgatgtctgacccgaactttggcagctcgacctccgaggtttc  
ggatgcgtgatcagaaaactcagatatccatgatcactcaactcgggtcccatgcacgaagtttttctccgtg  
>MITE\_T\_39672  
cactgagaaaaaagtttgTCGTGTGTACCGCGAAGTTCGGTGTTCATATCATCTCGactaattcgggtcgtc  
aaactgaattttcggttgtcaaaccgagctTGTGCGGTAAAAAGAACTGACGAAGTGGTTTGGTCATATA  
TGCCgaaagttcggttacacgaacgttcagaactaaaattcagtttgaCAAATCGAATATtaggatgatatggaacaacgaacgtt  
cggttcacacgaccgattgttttttttcagtg  
>MITE\_T\_39702  
AAATctaattgaggggctcggagaacaagtcgcataagtcagtttgcgaagaaattgagatattaatgatttcaagtaaaactagtcttacaA  
GCATCTTCTGTGAAAACCTTTGCCCCCAAATTCTAATCTtcaagcattaaaaagtcagtttgaacttttctccgcc  
ataaaaatccatgtaatttcgcaacttcaaacgcataatttctgaaatagcaaaaactgcacttatgcgccttgccttcaagcccctcgaATAG  
AGTT  
>MITE\_T\_39876

Ctagtactctgccgtgctaaggaaaaacgccgtatgatcattcgagagttgccaaattccatcaattaaatgtcttattttcaagcagaattatgaat  
atztatcttggaattttcagatgatttagagcCGATAGttataaaattctctgaaaaattggaggaaagtaTACactgatttcctgaaaatt  
cgtatttaattaacggaatttggcatcgggttaaaggctcatacggcggttcttcttagcagggcagtagCTTAG  
>MITE\_T\_39926  
cgaggggcttgagggttgcttgaggacaaggcgcataagtgcagttttgctatttcgagaaatacgtgttaaagtttcgaaattacatggatc  
cctatggcggaaagaaagttcaaaactgacttttgatgcttaaaattggaatttgagagcgaattttcacagaatatgcaccaagactagtttactt  
gatattattaatatcccaattttttcaaaaactgcacctatgcgccttggtctccttCTCCAAGCCCCACA  
>MITE\_T\_40036  
cactggaaaaaaaaaaaaataaaaaataaaaaaaaaaaaaaaaaaaaaaaaaaaaaacattggatctggagtcagactctaaaaacatcgacatg  
aaaaaatactcttgattcaatcagatttaagcttaaatcaagaaccaagcctctaatttgagcggatttccttttgatttaagcttaaatctgattgaatc  
aagagtatttttctgtcaatgttttcaagagcttgactctagatccaatgtgtttttttttccagtg  
>MITE\_T\_40053  
ttcgatagtggttgatgatcgttttggttcaaaacaatagaatataacctcaaaccaaaatgtaggaattgtcagaaaagctgaaaatgagaaatt  
tcgtagaaATTTTACTACTCATCGTCAATTAgactcatcgaatcaaaaaatctatcacaaaaacccgctctgtcagattactc  
aattgacttttgaggctatgtttatgtttgaaccaatctatAATTCTAAATCAATGCAATCTCATatccgtttgatgtatcgaa  
>MITE\_T\_40071  
ACAGaatatcaacgggtgtaagtcggcaatcacataactcgggttgacgctgcaaaactcctgttacacgttatttttaaactgaaaactactca  
acggcaattcttaaaactccgtgattttcttctgtgcaagaaaattctgcataaacctcgaggaaatgtcaattgttctcttttaaaaaataa  
catagaggcaaaatttcagacaccgcaaacgagttatgtgattgccgaattacaccgtcgatattcgt  
>MITE\_T\_40115  
Cctctatgctgccatgctaaggaaaaacgccgtatgaacattcgagagttgccaaatttcttcgataaaattttatttaggaaagctatgaatatt  
ttccttgcaatttcagaaacttaaggtgaaattgcgaacaaacttatacgaaaaattggaagaaaaatattgcaaaattctcccgagaattcgtgatt  
taccaaaggaaatttgcaacgcctggaggttcatacagcgttcttcttagcacggcagtagtcgagG  
>MITE\_T\_40118  
ATTACtactaaactgccgtgctaagcaagaacgccgtaaatccatcaagattttccctcactttttggaacttaacactgtctaacatgaaaactg  
ttttaccatgcacatCAAACTttcaagtttaagttcttgatagatttgcgaagaattctgtaaaaatattgtcccaaggtagacaagttttctgct  
atgatattgttttcaaaaaatttaaatggagtttacggcggttttgctgacggcagtagatgtgat  
>MITE\_T\_40150  
ctctattctgccgtgctaaggaaaaacgccttacgagcattcgagagttgccaaatttctctcagaaaatagttattttgaagaaagctgtgaatat  
tttcttgaaatttcaggaagtttaggtgaaattgcgagcaaaactatcaaaaaattggaagaaaaatgttCACGTGTTTACCAGG  
AATTTCgtgttatatacaaggaaatttggaacgcctgaaggttcatacggcggttttcttagcacggcagtagtgaag  
>MITE\_T\_40306  
attggattgcattttgcataaagggaaccaggagcatattgcaatgttgctaagattgtacaacttctttgtcttgaagaaagacctgattatccattg  
ccAGTTTCTATCTTACTCGCTAAAACCTGTagatttaagacaaaaattaccatataaaattcatatttttcatgattcagtagata  
taattttattgcaaaggatgaaaatgcacaatctatcATCATTGGATtccttctggttcttttgcataaatttaaatcaat  
>MITE\_T\_40318  
Tgatatgaattgcattttgcaaaaaggaaccactagcattgcaatgatccaagattgtgcaacttcatttttgaataaaattgcggaaatcgtga  
aaaactatgaaatttagatggtaattttgtcttaatttacagtttttagcgagtaaaatagaaactatgaatggataatccgggttttctccaagaca  
aaagaagttgcacaatcttagcaacattgcaatgtagtggttcttttgcacaaTGCAATCCATACA  
>MITE\_T\_40353  
tggattacattttgcaataaggaaccacgagcattgcaatgttgctgagacTGCGCAACTTCTTTGGTCTtgcttggaaaaaaaaaa  
aaaacctgatcattcattgacagtttctactcactcgtgaaaactgtgaatctaagacaaaaattaccatgtaactttttatttttcatgattcagtta  
tttactgcaaaggatgaattgcacaatctcgcatcattgcaatgtttctggttcttttgcataaattgcaatcca  
>MITE\_T\_40390  
ctgccgtgctacgttccgtactaaggaagaacgccgtatgaaccttcagacgttgccacatttcctcaataaagacctaatctactgggaaaaat  
gtgaatgttttctcaattgttttcagacaattttgttcacaattttgtttaaaattgttgaaaattcaaggaaaaatacgtataattttctcaaaaacaca  
tattttatccggggcgatttggaactgtcgaatgttcatacggcggttcttcttagcacggcag  
>MITE\_T\_40531  
cacggaaaaaaagcacgaggtgtttgatgatattgacattccaattaattgtgatagtagCCAGCTAGTAGCCATATATAC  
AagcaccccaattaattatgtagtagcccaataaattaggtaaaaaCTAAGCCAAATGTTGCaatactaccctaacttgagttgag  
gtattaccctaattaattggaaatgtccatatctaccaacaaattggggtagtgccacaatttttagaggataaccctgacacttttatTTCCGT  
G

>MITE\_T\_40923

tcgacggtgaaagtcggcaatcacataattcggtttcgacgtcgagacttctgtcatactttatTTTTTaaacggaaaactactcaacggcaatt  
ctttaaactgccgtgatttttctctctatgtgaagaaaacttcaaaaagaaaactgcaaaaacttcatggaatgatgttaagttttctccttataaaa  
aataacatagaggcggagattttcagacaccgcaaacgagttatgtgattgccgacttacaccgtcga

>MITE\_T\_40943

ATTAAGGCACTGggtgcgaaaagggcacttctcgattgcggtgtctcCGAACCTCTATTGCTAATTAATACCAT  
ATGCATGGCGAAAAATTTAATGGACGATTTTTTCCAGAGttctttccatagaaaattgtagaatcataaggaatatt  
cagtaaaatttttagtgaattgatgcattcactttccttacaataaatgaaatatttagaggcgactctgaaacactgcgatCAAGAAGtacc  
tttcgcatccaggCCTCAAT

>MITE\_T\_41022

atgccgcaatcacgctgaatttagcagctgaatgtggaagtcaacggctacgccaacggctgaaatttagcaaattcgagtttttcatcca  
gatgtgtatcaaactactcgaatagttcagacaaattcaacattagtcggatgggtgctgagagccgttgctgaattttgcgctcacgcgcaaaat  
tcaggcatcgggcagatgacttccacattcaagccacattccgCTCCACATTccgctgtgattgcggcat

>MITE\_T\_41029

TTAcgtatgccgcaatcacacgcagaatgtggcttgaatgtgtggaagtcacggcccgatgcctgaattttgcgctgtcacgcaaaattcag  
caacgattctcggcgaccatcgataatgtcggatttctgaactattcgaatagatttgatacacgtctggatgaaaataactcgaatctCGG  
AAATTTCAgcggttgagcgatgactgttgacttccatattcagctgccaattcagcggtgtgattcctgCATTCAAAA

>MITE\_T\_41063

GAattaatcagtgagaacaacaacacaccaactcggaaaaactaaaataatcaagacacacacaaaaactgcatggtaggtgaagaagttag  
ttaagaaaaagattgtgctgccgaaagacaaatgtttatggacactttaaggtcatagtcggaacagatgcgctaactCAATGACcttt  
tgtaaatattggcttcaatggaattgagcattttcaggtaccgagttggtgtgttttcgtcctcACTAATTCAATTC

>MITE\_T\_41098

Aactgccgtccacgcaaaaaacgccgtaacccattacaaattttgtaattttctccacatactgtcttataaaagaaaaatccaagtgtgaca  
aggcttcatttttaattttgagttccTTATGGTATGTCTAAATGGactagaaaaatgaaggacGACGGATGAATATT  
TGTCACTTTTCTCGTAAATagattttgtcagaaaaatatcgaaaaatgtCGGATGGAGATTCGGCGTTGA  
TACTTTGGACGGCAGTT

>MITE\_T\_41168

tcgacggtgtaagtcggcaatcacataacacATAATTGCGACGtcccagacttctgtcatactttatttttaaacggaaaactactcaa  
tggcaattctttaacctgtcgtgatttttctctgtgcaaaagaaaattctgaaaaacttcaaggaatgatgtcaatttgttctcatttaaaaaaaaa  
ataacatataggtaggcggagattttcagacactgcttcaacgagttatgtgattgccgacttacaccgtcaa

>MITE\_T\_41177

cagccgtgctaagatgccgtgctgaggaagaacgccgtatgagccttcaggcgttgccaaatttcttcgataaaatgtttttttgaggaaagt  
atgaatattttccctttaattttcagaatcttaaggtgaaattatgagcaaaattacctgaaaaattgggaggaaaatgttcatacgtttaccaggaaa  
ttcgcgttttatcaaagaaaattggcaacgcctgaaggttatatacggcgttttcttagcacggcag

>MITE\_T\_41208

cctaccgacggtgaaactaccagaccacgtatctcgtttgcggtgtttaaaaatctccactcacatttttttttgaaggagatcaaataaatatcat  
tccttacaattttcacagatttttctccgcacaaagaggaaaaatcacggaagttttcacgaattgacatagagtagtttctattcaaaaaataaagta  
tgacaggaagtctgcgacgacgtcgcaaaccgagatacgtggttgggagtttcaccgtcgatacg

>MITE\_T\_41251

tggactgcattttgcaaaaaaaaaaaaaaccaggagcattgcaatgttgctaaaattgcgcaactattttgtcttgaagaaaaacctgattatc  
catcaacagtttctattttactcgctgaaaactgtaatttaagacaacaattatcatgcaaaattcatattttcatggtttcagtaattttattgcaaaag  
ataaagttgcacaatcttagcaccattgcaatccttctggttctcttgcaaaatgcaatcca

>MITE\_T\_41292

atgaaTTGGACCgaattaacagaaaggaaccaagccacatcagctattgccaaatttaattgggcaatttagtttttacatgaaaacagtt  
gtgcggattttcgtgcaaatttcagtgaattttctcatagtagcaagcaaattccttatcatcttcacagaaatccgcacaaacgtcctttcataaaaa  
attggattgccagttaattttggcaacagctgatgtggcttgggtccttctgttaaaactcgggtccaattat

>MITE\_T\_41328

cctagactgccgtgctaagggaacgccgctatgaaccttcaggcgttgccaaatttctttgatactacgtaaaattcatggtaaatttatgaatatt  
tcttccaatttttagatgattatagttcgaatttcacctaacgattctgaaaatttaagaaaaaatattcttaacttctaaaaataaacattttatc  
gaaacaaatttggcaactctcgaatgttcaaacggcggttttctcagcacggcagtagagg

>MITE\_T\_41341

ATTGagggcgctgggtgcagaaaagggcaattcttggttcagtgctcctcaaaatctccgctaacgtttcGTCCATTATAATTAATGC  
AAAAGGAtgcaattttactttttgtaacttttactggATATCCTTCaagattttacaatgctgaaaacttaaaatttcagaaaaattgcccg  
atagtttctctctaaaaataaaaattagcgcTGGAGATTCTGAAGcactgcaaccaagaatgctctttctgcacccaacgccttaAT  
>MITE\_T\_41373  
cacggagaaaaaaacttcgtgtgtcggacccgaagttgaggtcatatggatctctgaagtttcggaggacgtatctaaaaatttgaagtcgagct  
gccgaaggttagggtcacacatctgaagtactccggtacataccgaagtgccctgatgtctgacccgaactcggcagctcgacctcaagtttcg  
gatgcgtgatcagaaactcagagatccatgatcctcaacttcgggtcccatgcacgaagtttttctccgtg  
>MITE\_T\_41403  
ttcaggggtgccacagaatttagaaaaatgaaattccttgacatttctctgatttccttgacacattttggtggaattccctgataattgaagatgagacg  
gatggttaagaaggcataattgaaaatagtttcaggcaaaatttgtgttgaaacctcaaaccttctaaaaaagaactgaggggtgatttaaca  
atttccttgacattttgtcattttccctgacatttccgggtttccttgactgtggcaacctgga  
>MITE\_T\_41576  
gttatattgacggtgtaagtcggcaatcacataactcgggttcgcagctcgctgacttctgtcactttatttttaacggaaaactactcaacggc  
aattctttaaattgccgtgatttttctctgtgcgaagaaaattctgcaaaaactcaaggaatgatataatttgtctcctttaaanaataacata  
gaagcgggagatttcagacaccgcaaacgagttatgtgattgccgacatacaccgtcgatatac  
>MITE\_T\_41656  
cactgggaaaaaaaacatattggatctagagtcagactcttgaaaacattgacaagaaaaagttactcttgattcaatcagaatctagcttaaatc  
aagaaccaagcctcttaatttgagcggatttccttttgatttaagcttaaatctgattgaatcaagagtccttttctgtcaatgtttcaagagcgtgga  
ctctagatccaatgtgtttttttttttttttttttttttttttttttttccagtg  
>MITE\_T\_41659  
tgtctgcaccttcaggcaagtatcacaagcgccatgcgacgtttaataatttcgcccatttttttttactgagaaattgttggttgatctgt  
tcgaaaatttcactaaattttatcggcagcacaagaaaattcgggtgaatttcggacagctgatcgtgaacaatttctctgtaaaaaataatag  
gcgcggcgggcgaaatttttaacgtcgcattggcgcttgatactttgcctggaaggtgacgata  
>MITE\_T\_41804  
tcgacgggtgaagtcggcaatcacataactcgggttctcGGTAACGTCgcgcgtcgcagacttctgtcatattttatttttaaacggaaa  
accattcaacgacaattctttaaactgccgtgatttttctctgtgcgaagaaaattctgcaaaaactcaaggaatgatgtcaatttgctctcctt  
aaaaaaataacgtagaggcggagatttcagacaccgcaaacgagttgtgattgccgacttacaccgtcga  
>MITE\_T\_41898  
attggaccgcgttaaacagaaaggagccgagccacatcagctattgccgaatttaactgggcaatttaatttttccatgaaaacgtttgtgcggatt  
ttgtgcaaatttcagtgaattattGCATAGtactaattgaagtaaattccctgaaatttcaaaggaatccgcacaaaccttctttgtaaaaaat  
taatttgctcatttaatttggaatagctgatgtggcttggttcttctgttaaactccgtccaat  
>MITE\_T\_41980  
cactgaaaaagagaGTACGGTatcatccgaactagttaggatcctAAGGAGCCtcgttttggtcggtacacacaacctaatatttcggt  
ctgttcaaccgaattgttcggtccGCTGAACCAAACGTTTCAAGAATTTGTAATGGTTTCGGTCGCTCAAAC  
CGAACAGTttggttgaacagaccgaatactTCGGTTGTGTGAACCGAACAAacgtgggtccatgatgcgtaactag  
ttcggatttaccgaatttttttttcagtg  
>MITE\_T\_41998  
cctgtactgccgtgctagggagaagacgccgtatgagacttcaggcgataccaagtttctccgataaaaaccgaatttacagagaaaattgcgaa  
tattgtTCTCCAAACATTTTCGAACAATTTTGTACgctatttaactaaaatatttgaaaattcaaggaaaaatatgcatgaa  
agttgcaaaaatacatgtttatcgagggaaatttggaactctcgaatgttcatacggcgatcttcttagcacggcagtgtagg  
>MITE\_T\_42147  
TCGACGGTGTCAAGTCCGGAACACGTATCGCGTTCGCGGTGTTTCTTTTTTCGGTGTGaatctc  
cgctcttatttttttttttaaaaaagaacaaagcgacatcattccttgaagttttgcagaattttttgtccaggGAAGATAAACCCCGG  
CAGTTTTTTaggaattgccattgagtagtttccgtttaaaaaatgaagtatgacaggaagtctgcgacgtcgaaactgagatacgtgattC  
CGGACCTACACCGTCAA  
>MITE\_T\_42280  
tgccgcaatcacacgctgaatgtgggagctgaatgtggcttgaatgtggaagtcacggcccgcgacctgaattttgcgcgtgatgcgcaaaatt  
cagcaacgattctcagcaaccatcggaacaaatttgaaattgtctgaactattcgagtagatttgatacacatctggatgaaaataactcgaatttgc  
aaatttcagccgttgggcgatgactgttgactccacattcaggtgctaaattcagcgctctgattgcggca  
>MITE\_T\_42308

cacggaaaaaacgagtttagggctggtacctgcgCCGAAGGCcccagccctaaccgggtaggtaaaattgcttcacctccaccgccac  
aggggagggcccgcgcgtagagcccaaatctaactgcttcagggttcagccctacctggttaagagctagacctgtccaggtagggtg  
ggccttacccgcgcagggcctgcccctgtggcggtggaggtgaagcaattctatAGGGCCCAGCCCttatctcgtttttcagtg  
>MITE\_T\_42354  
cactgaaaaaaaaaaaaaaaaaaaaaaaaaaaaaacacattggaattggatctagagtcagactctaaaaacatcgacatgaa  
aaagtactcttgattcaatcgatttttgcttaaatcaagaaccaagcctcttaattgagcggatttccttttgatttaagcttaaatctgattgaatcaa  
gagtatttttctgtcaatgtttcaagagctggactctagatccaatgtgtttttttccagtg  
>MITE\_T\_42384  
CACTGAAATAAAACGATGCAACggcctacactgagaaaacactatggctataacctattagaggtaaataatggaacacca  
ctaatagtagtacctctacatataataatagcacatataccttagttatggtagctgtaccttaattaggtacagagaccttagtatgggtcacagacc  
gagaatcattagttatttacgactattataggtgtccatattacctctaataaggtttataaaccatagtttttctcagtg  
>MITE\_T\_42524  
tggttgctatttgcacaaaaggaatcaaggacattccaatgttgctaggattgtgcaacttacattctttgcaataagaTTACTgatcatgtaa  
aaaattaaatacaaaaggTAAATTTCTTCTCGAATTTATAGTTTAATGGGAATGGGAGTAACGATAC  
AATTTGTATATATGATCAGTTTTTAATTGCAAGGTagagaaagttgcacaatcttagcgacattggaatgctcttggt  
tccttttcgcaaatgcaatcca  
>MITE\_T\_42538  
tcgacggtgtaagtcgcaatcacataactcggtttgcgacgtcgagacttcccatcatatttttaaacattatttttaaacggaaaactactcaa  
cggcagttctttaaactgccgtgatttttcttctgtgtgaagaaaattcgcacaaaactcaaggaatgatgtcagttgttctctttaaataa  
catagaggcgaagattttcagacaccgcaaacgagttatgtgattgccgacttacaccgtcga  
>MITE\_T\_43022  
CATGGattggattttgcacaaaaggaaccactagcattgcaatgatgctaagattgtgcaacttcattctttgcaataaaattgcggaaatcgta  
aaaactatgaaatttagatggtaattttgtcttaaatctacagtttttagcgagtaataTAAGAACTATGAATGGatgatcggggttttct  
ccaagacaaaagaagttgcacaatcttagcatcattgcaatgctagtgggtccttttgcaaatgcaatccacgtG  
>MITE\_T\_43087  
catatcgacggtgtaagtcggaatcacataactcggtttgcgacgtcgagatttctgacatactttatttttaaacggaaaactactcaacgac  
aattctttaaactgccgtgatttttcttctgtgtcgagataattcgcacaaaactcaaggaatgatgtaaattgttttctttaaataaataca  
agagacgggagattttcagacaccgaaaacgagttatgtgattgccgacttacaccctCGATATG  
>MITE\_T\_43129  
attggattgcattttgcacaaatggaaccaagagcattcgcaaatcgctgaaattgcgcaactttttaccttgcaaatataaactaatCACCCA  
AagaagtttatcttactcccaataaattatagattcaagacgaaaattaccttgtaaatttaaattttgcaccATTTCAGTGCATTCA  
TTGTgtagaatgtaagttgcacaatcctagcaacattggaatgctcttagttccttttgtaaaatgcaatccaat  
>MITE\_T\_43156  
tatatggatcgcattagcaaaaaggaaccaacgcaattacagtggtttcacaatcgctgagTTCTcctattcttttaaaacttaacttatgtac  
aatattaaatcaaacattattttctttaaatacaaatgttggtGAAAGCAAAAAGTATTTGCCATTCTGAgagatt  
tcttagataattatggagaagcaacattttacaacactgtaattgcgctggttccttttgcaaaatgcgatccatatca  
>MITE\_T\_43182  
tatgaagtcagtgagaatgaaaacacaccgactCTGTAACTcgaaaaatctcaatttcattgaagacagttaattacatgaaggtcattgaa  
attggcgcacgtgttccaactggacgtttaaggtgccataagtactgtcttttgcaGCAAACATCTTTTCCGCAAACGAA  
CTTCCCCACCTAttctgcagttttgtgtgttcttgattattttcattttccgagttggtgtgtttcgttctcactgattcaaa  
>MITE\_T\_43216  
AAATTGAATTAGTGAGAAGAAAAACActtcaactcaaaaaaatgaaaataatcaagacacacaaaaactgcacagta  
ggtgagaacttagtctaagaaaaatattttgggtgccgaaagacaagtacttaaggacactttaaggtccaagctgGAACAGATGCG  
GTAACATATGATGAccttgaaaattgactgtcttaataagaaattgggcgttttcgagttatcgagtggtgtgtttcgtctcactgattcaa  
ttat  
>MITE\_T\_43224  
tatggatcacatttagcaaaaaggaaccagcgcgattacagtggtttcacaatcgctgcgacttctttttcttttaaaacactcAATACATGT  
AGGTACAGTATTggaattacacaattattttcattgaaatcaaTAAGTTCACGGTGGGAAGCAAAATGTATT  
TGCTATTCTTAGACATTTTTTAGATAAACTTGAAGAGACAGCATTTTAACAACACTAaatcg  
cactgggtccttttgctaaatgcgatccaaa  
>MITE\_T\_43521



ctgccgtgctagggaaaaacgccgtatgagcattcgaatgttgccaaattgcctctcggaaaatatttggttttttttaagaaacgtatgaata  
ttttccttgaaattgccAGACACTTCAAaccaaattacgagcaaaattttctgaaaaatcgaagaaaattaactatacatatttcccga  
attcgtgcgATTCTCGAAataagtttgcaacgcctcaaggcTGATACGACGTTTCGTCCTTCGCACGGTAG  
>MITE\_T\_43576  
ATTGggttgcattttacaanaaggaaccgcaCGAGCATCCCAATgtcgccaagattgtgcaactattTTCACCTCACAA  
GTATAAACTGATCAACTAAATAAGTTCTacctttactcccaataaactataaattcaagccaaaaatcaccttgtaaattta  
atttttgcattgattcaatgATTTGATATCAAAGAGTGTAAGATGCACAActttgcaacattggaatgctcttggttcctt  
ttgcaaatgcgatccatt  
>MITE\_T\_43676  
gatatcgacgggtgaaactaccaaacacgtatctcggttgcgacgtcgagacttctgtcatactttatttttaaatgaaaaactactaaacgtcc  
agtcttgaaaaattctgtgattttctctctcggtgcgaagaaaattctgtgaaaaattcaaggaatgatattgatttggtctacctcaaaaaataaaatg  
cgagcgtacatttttaaacaccgcaaacgagatacgtggttggttagtttcaccgtcgatatg  
>MITE\_T\_43729  
cgtggattgcattttgcaaaaaggaaccaagagcattccattattgctaagattgtgcagcatacatatttctgcaataaaattgctgaaacctttcaaa  
aagttaaactactatggttaattttctgattgaatttatagtttaagGGAGTATACATAAACTTattcagatgatcagtttatatttgca  
aggcgAAACAAGTTGCACAACcatagcgacattggaatactcgtggttccttttgcaaatgcaatccacg  
>MITE\_T\_43789  
ctatactgccgtgctaaggaaaaacgccgtatgagctttcaggcggttgccaaatatctgtTGTTAAAGcaagaatttcggaaaaactgtg  
agtatttttctcaatttttcaggaattttgtcgcaattttatccgaagttcttgaaaaattctcgaaaaatattcataactctcctcaaaaaataaacatt  
ttatcgaggaaatttggaactctcgaatgctcatacgggtgttttccttagcacggcagtag  
>MITE\_T\_43847  
CATATCGTCAcgttcgggccgaagtatcacaagcgccatgcgacgtttcaaaatttcgcccattttatttctcacagagaaattttta  
acgaagctgtccgaaaaatgtcactgtaTTTTCTTCATACTGCTGATagaattcggtgaaattttcaaacagattcaaccaacaatttt  
actgtaaaaaataaaatggcggcggaatttttaacgtcgcatggcgctgtgatactttggccggaaggtgacgaaatg  
>MITE\_T\_44066  
tatatcgacgggtgaaactaccaaacacgtatctcggttgcgacgtcgagacttctgtcatacttcatttttaataaaaaactacttaacgtcc  
agtcttgaaaaattctgtgattttctctctcggtgcggagaaaattctgtgaaaaattcaaggaatgatattgatttggtctacttcaaaaaataaaatgc  
gagcgtagatttttaaacaccgcaaacgagaaacgtggttggttagtttcaccgtcgatatg  
>MITE\_T\_44102  
Caccagggaaaaaaaaaaaaaaaaaaaaaaaaaaaaaaaaaaaaaaaaaacacattggatctagagtcagactcttgaaaacattgacaag  
aaaaaggactcttgattcaatcagatttaagcttaaatcaaaaggaaatccgctcaaattaaggaggcttggttcttgatttaagcttaaatctgattga  
atcaagagtatttttctgtcgatgttttaagagtctggactctagatccaacgtgtttttcccagtg  
>MITE\_T\_44208  
tggattgcattttgcataaaggaaccaggagcgttgcaatgttgctaaaattatGCATCTTCTTtcgtcttgaggaaaaacctgaatatcc  
attaacagtttctattttactcgctgaaaattgaaaatttaagacaaaaattatcaggtaaatttcatttttcatggttcagtagttttattgcaaatgat  
gaagttgcactatcttagcaccattgcaatacTTCgtctggttccttttgcaaatgcaatcta  
>MITE\_T\_44441  
cacggaaaaaacgagtttagggctggtacctgcaccgaagggtccagccctaaccgggtaggtaaaattgctcacctccaccgccatagggg  
caggccgggcgcgctagagcccaatctacctgcttcagggttcagccctacctaGTAAGAGCTAGACCCTGTCTAGGT  
AGGGCTGGGCCTTACCcgcgagggtcctgcccctgtggcggtggaggtgaagcaattctagggcccagccctaattctcgttttt  
cagtg  
>MITE\_T\_44599  
catatcgacgggtgaaactaccaaacacgtatctcggttggttataaaatctacgtcacattttatttttgaagtagacaaatcaatatcatt  
ccttgaaaactttcacagaattttctccgcacgaagaggaaaaatcacggaaattttcaagactacacgttaagtagttttcatttaaaaaataaagta  
tgacaggaagtctgcgacgtcgaaaccgagatacgtggttggttagtttcaccgtcgatatg  
>MITE\_T\_44602  
cactggaaaaaacacattggatctacactgagaaaaagctatggtttataaacctattagtggtaaatatggaacacctataatagtcgtaataa  
actaatgattctcggtctgtgaaccatactaaggtctctgtacctaattaaggtacagagaccataactaaggtatatgtgctatttatatgtagag  
gtactactattaggtgttccatatttacctctaataaggtttataagccatagtttttctcagtg  
>MITE\_T\_44608

aaaatcgacgggtgcaagtcgcgaatcacataactcatttgcggtatctgaaaatctctgcctctatgtaatttttaagagagaacaaattgacatca  
ttccttgaaagttttgcagaattttcttcgcatagagaagaaaaatcactgcaattttaaagaatggccgttgagtagtttccgtttaaaaataaagta  
tgataggaagtctgcgacgtcgcaaattgagttatgtgattgccgactcacaccgtcgatatt  
>MITE\_T\_44663  
taattggatcgcathtagcaaaaaggaaccagcgcgactgcagtggtgttaaaatgttgcttctcatgattatctgaaaaatctcccagaatatcG  
AACAGTTTTTCGcttactaaaaaattgttaatttaagggaaaGTAATTGAGTgcattttaatactgtacatatattagatatttttaa  
aagtaaagaagagggtgtacgattttgaaaacactgtaatcgtgctggttccttttgcttaatgcaatccaattca  
>MITE\_T\_44727  
TCgccagtgaactaccagaccacgtatctcgtttagcgggtgttaaaaaatctccgctcctatttttttttgaaggagaacaaaaaaaaccattt  
cttagaattttcacagagttttcttcgtacagagaagaaaaaacagggaacttttcaagaattgactttgagaagttttcatttaaaaaataaagtag  
acaggtgACAGGAAATCTAAAGcggcacaaccgagatacgtggctggtactttcaccgtcga  
>MITE\_T\_45346  
ATTTaactcgacgtatgcgaaaacgtccgttgccaTTATAGGATTTCAAAATTGCGGTGGGTTTCTTTTCGTC  
CCACGACACTGATGAAGAGgatcgatctctttgtaaacATTTAATTACACTTAagggattatttaaaaaattgttca  
acattCTTAACGTCTTAAACCTTTTTGTGTCGTTAAGTTACAACGAaattgtccactcaaattctgaaatact  
ATCTTCGACATcagacgttttcgcatacgttgatttaatt  
>MITE\_T\_45355  
cactggaaaaaaaaaaaaaaaaaaaaaNaaaaaaaaaaaaaaaaaaacacattggatctagagtccagactctaaaaacacactgacaagaaa  
aaatactcttgattcaattggattttgcttgatcaaacgaaatccgcttaaatgaagaggttggttcttgatttaagctagattctgattgaatcaag  
agtacttttctgtcgatgttttaagagtctggactctaaatccaatgtgtttttttcccgatg  
>MITE\_T\_45378  
attgaatcagtgcgagcgAAAACACACTAACTCGTAATTTCGATAATGCTCAATTTGattaaagacagtcaattt  
tcataaaattcattgAGGGTAgcgtatctgttccaacttggatcTTTAAAGTATCCTTAAGTATTTGTCTCTCGGC  
ACCAAAGttatttttcttagactaactatTCACGCACCGTGCAGTTTTATGTGggccttgattattttcatttttcgagttg  
gtgtgttttcgttctcactgattccaT  
>MITE\_T\_45396  
TGAGGGTCTTAGAAGACAattaaggcgcataagtgtagtttttttaaaaaattgagatatttacgATTTCAACTAGTCTt  
gaaactagcttgatgcataatctgtgaaaaatcgctctcaaattccaatttttaagcatcaaaaaagttagttgaactttcttctgctatgaggatcc  
atgtaatttcgaaacttcaaacatccattttctgaaatagcaaaatccgcacttatgcgccttgctccaagccccctca  
>MITE\_T\_45484  
GCGCCTTGTCTATCCACGGAatgtttcacgggatttttccaagttcgaatcgcaggaatgaaacttcaaacttccGGGCTT  
TTTCCTCGTAaggaaacacaacaaaattaattctccttctttgaAGTCATTCCTGGTGCTCCACAAGGACTCT  
TACtggtactgtgattagtagtaactcaataatTTTCCCAAcctcgcgaagtgcagatttttccctgggacaaatcccatgaaacgttcC  
GTGGAGACGAGGCC  
>MITE\_T\_45712  
tgagaggcttgaggaaaaaggcgcataagtgcagttttgctatttcgagaatacgtatttaagtttcaaaattaagtacATGGAGTCTT  
ATGGCGgagaggaagttaaaactGCTTTTcaatgccttaaaagtggatttcagttgtgaattttcacagaaaatactttcaaactagttct  
AGTTGAAGTTGTGAAtatatccatttttttaattttcaaaaactgcacttataagCCTTGaatccaagccccctca  
>MITE\_T\_45859  
CTTATCCAAtggtcacactggaaaaaacacattggatctagactagagtccagactctaaaaacatcgacaagaaaaagtagtcttgattc  
tatcagaatctagcctaaatcaagaaccaagcctctaatttaagcggatttcgttttgattcaagcaaaaatccgattgaatcaagagtatttttctg  
tcaatgttttcaagagtctgcactctagatccaatgtgtttttttcccagtgatccATGGCTAAAG  
>MITE\_T\_45934  
TGgatcgatttagcaaaaaggaaccagcgcgaattacagtgttttcgaAATTGTGTaacttttcttttcttttaaaaaatgcttaatatatgtac  
agtattaaaactacacaattattttctttgaaattaacgATTTTTTGGTTAAAAGCAAAAGctttttgctattctgggagatttttt  
agatacttacttatgaagaagcaacattgtacaacactgtaatcgcgctagttccttttgctaagtgcGATCCA  
>MITE\_T\_45941  
tatatggattgcattttgcaaaaaggaacgaggagcattgcaatttcattgtgcaacttcttttgccTGAAGAAatacctgattatccattaa  
cagtttctattttgctcgtgaaaactgtaaatttaagacaaaaattcccctgtaaatttcatttttacatgatttcagatttttgtGCGaagggtga  
agttgcacaatcttagcatcattgcaatctttctggttccttttgcaaaatgcaatccatatt  
>MITE\_T\_46020

cacggaaaaaatgagattagggctgggcccctagaattgcttcacctcatACCCACAGAGGCAGGGCCTGCGCAGGT  
GGGGCCTAGACCTACCTGGACAGGGTCCAGCCCTTACCAAGTAGGGTTGAACCCTGAA  
GCAGGTAGGTTTGGGCTGTACCCGCGCCGGGCCTGTCCCTATGGGtatgaggtgaagcaatttcacca  
cccggtagggctgggaccttCGGGCACGTACCAGCcgtaaactcgtttttccacG

>MITE\_T\_46129

aggccttgtctccacgggacgtagtttcatgggattgtcccagggaaaaatctcattgtgaaattgggaaaaatattgagttaatcaatactGAT  
CACAGTACCAATTAAGAGTCCTTATGGCGTCGCATAGGAACGACttcaaaggaagaagaagaattgt  
gATGTGTTTTTTTAACGGGGAAGAAAGCCCAGAAGCTTCATGCCTGCGACTCGAACTTGG  
GAAGAatcccgtgaaacgtcccgtggagacaaggacT

>MITE\_T\_46411

tggattgcattttgcaaaaaggaaccaggatcaTTCTAATatcgctaagatcgtgcaactttttcacttttcaaatATAAACACATcat  
ctaaacaaattttatcttaactcccaataattatgaatttaagacgaaaattaccttcgtaAATTCAACTGTTTTTCATAATTccagtg  
attttttcaagaatgtacctaagtcgcacaatcctagcaacattggaatgctcttggttccttttgcgaaatgcagtgcca

>MITE\_T\_46528

ATTGAAttgggacgtgcgaaaaccgctaattgtccattttccaagcttaagtttttgagttcatattacttttcggagttggtGTAACCA  
CAAAAATGGCGTTAAACTCATCCTGGATTTCCTAGATTTCCTTGATCTCAAAAAtgagtcctttc  
atcacttttatgggtgtatcgactctttaaaaatattatgaactcCAAAATacttaagactggaaaaatggacattagcggtttcgcacgtcccg  
attcaat

>MITE\_T\_46794

CAGGGtcgccacagaatttagaaaaataaattccctgacattttcctgatttccttgacacattttggtgaaattccctgacaattgaagatgtgatg  
gatggttaagaagacataattgaaaatagtttcaggcaaaattctgttcgaaacctcaaaccattctagaaagcaaatgaaggtgatttaacaa  
attttccctgacattttcgtcatttgcctgacgtttcccggtttccctgactgtggcaaccctg

>MITE\_T\_47578

CAAATACTGTCTGTAAGGaaagacgccgtatgagcattcgagagttgccaaatttccttcgataaaatgtttattttgaagtaa  
gctatggatattttccttgaaaatacaggaaaaaggtgaaattgcgaacaaaattatctgaaaaattggaggcaaatcggttacaaattttccagaaa  
attcgtgattttatgaaaaatttggaacgcctgaaggctcatacggcggttttccttagcacggcagaatatc

>MITE\_T\_47585

CGTTACTTGGCACCCCCATAAGATCCAAGTTGTAACCTAACGGAAGCCTTGTGTTGCCCCG  
GTGACctaaccaagacataaagacggagcgctcgtatctaaagcacggggaaaaagtgaagctaggttcggcgctgcgcgcttggtg  
agtgtgtaaatgagcgcgggaatccatggcggcaaacggaaatttgattgaactgtcctctgattttgcacatttcttcttgaaacgtattttaaa  
ttcctaaacgaatataactaagaaagttcagctcgcgtcctaataataacactacttttgctcggtaacaggcagtaatctacataaagttagtttt  
cttctgctcatggtggttctgcaggttcaaacaggccgttacagttctagatcaacgttactcccaatgaaattaatcggtcgacgacggactgaa  
actaacctaaagttaaaaaaatatgagtggtgtacctgaatttgggcaaaaatctacctaaaatactttgtttccgcaattttatttattagttcccgccct  
acatttgaattcaaacctgtcccgtttcgccgccaatccttagccaatagtagaggtgattgaaaagaagctctagaagcttcatttttgccttttag  
tgctccgtctttatgtctttggaccTAACCCAAGTCCAATGGCTTTAAGTAACCTAACCTACTTAAGTCCA  
GAGGCTCCAAGTAACC

>MITE\_T\_47658

ATTTGGACTgcttaagtagaaaggaagcaagccacatcagctattgccaaattaaattaggcaatttaattctttccatgaaaacgggtgtg  
cggattttagtcaaaatttcagtgaaattttctcaattacgaggcaaatccttaaaattttcaaggaatccgctcaaacactctctcgtaaaaattta  
aattgccagttaaatttggcagtagctgatgtggcttggttcctttctgttaaattgcggtccaatt

>MITE\_T\_47941

cattctaccgtgctaaggaagaacgccgtatgaacattcgggagttgccgaatttccttgataaaacatgtattttgacaaaattcatgcatacgtt  
tccttgaaattttcagatatttttagattaaatcgcgtagaacattgtctggaaattttggaaaataatgctcgcaattttccagtaaatccgggtttatc  
ggaggaaaacttggcaacgtctgaaggctcatacggcggttttccttagcacggcagcat

>MITE\_T\_47994

tcgacggtgtaagtcaccaaccacgtatctcgtttgcggtgtttgaaaatctccgatctattttatttttaaaaggagaacaaatcaacatcattcct  
tgaagttttcgtagaattttctcgtaggggaagaaaaatcacgacagttttcaGAAAtagccattgagtagttttccattttgaaaaatgaagtat  
gacgaGAGATCTGCcatgttgcaaacgagatacttggTTATGCGGatacttacaccgtcga

>MITE\_T\_48169

cgcactgccgtgctaaggaaaaacgccgtataaaccttcaggcggttgccaaatttccttcataaaacacgaatttcctcgtaaacttatgactatttt  
cctcccaattttcagataatgttggtcgaatttcacctaagattctgaaaatttataggaaaaatattcaaaacttcctcaaaaataataatattatcg  
aaagaaatttggcaacttttaattgttcatacggcggttttccttagcacggcagtaga

>MITE\_T\_48244

tactccgtgctaaggaagaacgccgtatgaacattcgagagttgccaaaatttcccgataaaacatgtattttgaagaaattaatgcatatttt  
ccttggaatttcagatatatttaataaatcacgATAGCtaaatctcctgaaaaatccGAGGAGATCTGCGCAgaaatttcctag  
aaattcgtgattgtcgaaggaaatttggaacgcccgatggctcatcaggtgttctccttagcacggcagca

>MITE\_T\_48276

tcctgcagtgctaaggaacgccgtatgaacattcgagagttgccaaatttccttgataaaatgtttatttcgaggaaaattatgaatattttacctt  
gaaatttcaggaacttttagatcaaaatacgaacaaatctctctgaaaaattggaagaaaaataccattcataaattaccagggaattcgcgtttc  
atcaaagacaatttggaacgcctgcaggttcatacggcggttctcctgagcacggcagta

>MITE\_T\_48289

attctgccttgctaaggaagaacgccatatgaaccttcggccgttgccaaatttccttgataaaacacgaatttcctggtaaacttatgaatattttcc  
ttcaactttccggataattttgttcgcgattttcacctaaagattctgcaaatttcaaggaaaactattcatagcttttctaaaaacgaacattttatcg  
aaggaaatttggaactctcgaatgttcatacggcggttctccttagcacggcagaat

>MITE\_T\_48387

tcgacgggtggCACTCCagaccgcgtatctcgtttccTGTGTTTAAGAATCTGAGCTGGGatcccatcttactttttgac  
ggagaacaaatcaatttcattccctcgagttttcacagagttttcttgaaaggagagaaaaaattacggaagtttcaagaattgacgttgagtgggt  
ttccaggtaaaaaataaagtatgacagggaatctacaacgtcgcaaaccgagatacgtgggtctggtagtttcaccatcga

>MITE\_T\_48453

ctctgaaaaaatgaaatttgccaTTTGAACCGAACATTCGGTGTTGCAtgtcatccaaatattcggtttgtcaaactgaa  
ctttcggttcgtgtaaccgaacttcggCATTTATGACCAAACCTTAGTTTCGCCAGTTCACCTTTATCGCACGA  
gttcggttgcaaaaccgaaagttcagtttgacaaaccgacttagttgggatgatatggaacaccgaaccaatttggtagacatacaccgaatttctt  
ttttcagtg

>MITE\_T\_48497

tcgacgggtgaagtcggcaatcacatacctaactcgtttcgggtgtctgaaaatctccgcctatctatcattattttaaaggagaaaaaattgacatt  
atttctgaagttttgcaaaattttcttcgcatagagaagaaaaatcatgacagatttaaagaattgccattgagtagtttccgtttaaaaataaagt  
atgacaggaagtctgcgacgtcgcaaaccgagttatgtgattgccgacttacaccgtcga

>MITE\_T\_48510

attggaccgcgttaaacagaaaggaaccaagccacattagctattgccaaatttaactgggcaatttaattttcacatgaaaacgggtggtgcagat  
ttccatgcaaaatttcagggaattttctcccTAGTGCGAAGcgaataccttaaaatttcgaaagaatccgcacaaacgtttcctcgtaaaaa  
aattaaattgccagttaaatttgcccatagctgatgtggcttggttcctctctgttaaacgcggtccaat

>MITE\_T\_48711

cacggaaaaaaagtgttaggggttatccctaataattgtgttactaccacaatttgttgatgatacggataTTTCTGATTAATTGTG  
GTAtaaccgcaactcaagttagggttagtcgcaacacttgagttagtaacctaatatttgggggtGCGACCACGATTAATTC  
GTGCACTACCACAATTGTTTCGTGTacaaccacaattaattggaatgtccatatcacacaacaaactcctgcttttttatcc  
gtg

>MITE\_T\_48734

tggattgcattttgcaaaaaggaaccactagcattgcaatgatgctaagattgtgcaacttcatttttgcaatacaattgcggaaatcgtgaaaaact  
atgaaatttagatggtaattttgtcttaaatctacagtttttagcgaggaAAATAgtaactattaatggataatcgggttttccccaagacaaaa  
gaagttgcataatcttagcaacattgcaatgctagtgggttccttttgcaaaatgcaatcca

>MITE\_T\_49126

attcgtcaccttcaggcaaaagtatcacaagcgccatgcgacgtttaaaaaattccgccgccattttatttcttactgagaaattgttggtgaatctg  
tttgaaatttcactaaatttattcggcgagcacaaagaaaattcagtgaaattttggacagcttcggtgaacaatttctctgtaaaaaataaatggc  
ggcggaaatttttaaacgtcgcagtgccgttgatcttgcctggaaggtgacgaat

>MITE\_T\_49213

attggaccgcgttaaacagaaaggaaccaagccacatcagctattgccaaatttaactgggcgatttaatttttcatgaaaacgggtgtgcggat  
ttctgtgcaaatctcagtgaaattttccataatgcaaagcaaatccttaaaatttgcaaaggaaTCTGCGAAGgcgtttttcgtaaaaaatg  
taatttccgggttaatttggaatagctgatgtggcttggttcctttctgttaaacgcggtccaat

>MITE\_T\_49249

tggattgcattttgcaaaaaggaaccaatagaattccagtgctgctaagattgtgcaactttctctTCCTGCAAATATAAAACGAT  
CATCGTTACAAGTTTCATCTTTgctctcaataaactatgaattcaagacgaaaatcacctttgtaaatccgatttgttcattttt  
agtaATTTGTTTGCAAATCATGTATGTTggacaatccagcaacattggaatgctcttggttccttttgaaaagtGCAAT  
CCA

>MITE\_T\_49398

cgctgcacctcccgccaaagtatcacaagcgccatgcgacgtttcaaaattccgccgcgatttaatttttacagagaaattgttggtggaatc  
tatctgaaaatttactggattttatcggcagtgcaaagaaaattcagtgaaatttccggacagcttcgttgaacaatttctctgtaaaaatacaatg  
acaatggaaattttaaacgtcgcgatggcgcttgtgatactttgactggaaggtgacgacg  
>MITE\_T\_49431  
tactgtcatgctaaggaaaaacgccgatgcacattcgagagttgccaaatttgtccgataaaatgttcattcttgagaaaaattgtcaatatttctct  
tgagattttcagataatttagatctagttgcgaatgaaattctctgaaaaattggagggagagaatcttcacaaaaatgccctttaaatcgtatcttatcc  
aaggaaattcggcaacgccgatgggtcatacggcggttttcttaacacgacagTT  
>MITE\_T\_49435  
tcgacggtgtaaactggcaatcacataggttaactcgtttgcagtgctgaaaaatctccgcctctatgttatttttaaggagaaacaaattgacatca  
ctccatgaagttttgcagaattttcttcgacagagaagaaaaatcacggcagttttaagaattgccgtcgagtagtttccattaaaaataaag  
tatgataggaagtctgcgacgtcgaaaccgagtaattgtgattgccgacttacaccgtcga  
>MITE\_T\_49551  
tgaaaagcttgaggacaaggcgcataagtgaagttttgctattccgaaGAATACATGTTTGAGttacaaaattacatggatcct  
aatggcggggaagaaagttcaaactgatttttggcgcttaaaaattggaaatagggagcgaattttcacagaatatgcattaagactagtttacttg  
gagTCATTCAATATACAgtatctcagtttttcaaaaactgcacttatgcgcctgtcctccaagctcctca  
>MITE\_T\_49578  
ATtgaaccgagtttaacagaaaggaaccaagccacatcagtcattgccaaagttaactgggcaattaaatttttacgagagaacgtttgtcggga  
tttctttgaaaatgttaaggaatttcttcgtaccatggagaatttctactgaaattgcacgaaaaatccgcacaaccgtttgcatgtaaaaaattaaatt  
gcccgattaaatttggcaacagttgatgtggcttgggtcctttcagtttaacgcggtccaat  
>MITE\_T\_49587  
ATTGTCGTTGctcccacgaaagaacgtaactacattcaatgttgccgaattcaacctcgaaattgcagtttaacAGGGAAAT  
CTTGGAATCaccaaataaaatttcttgaattttcctctgatctcgagcaaaaatcagagaaaattgaactaaaatCAAACAAT  
TCCATTCTTGTGAATCATTGAATTGTtcagacaatttggcaactttggaatggagttgcgtttCTCCgtcagggaaacg  
acgaat  
>MITE\_T\_49688  
tctttccgcacaaagttcatttggtaattttccgatcatcgttgccgcacaaactCATTTTTGCGCTAATAATTTTCTGTA  
GTATGCggcaacgtcgagaaaaatagaggcatattTAAGAGCAACGAGTGAaccaagatttaaaaaaattattgatgttgc  
caaatatttAAGATCTGATTTGTGCGcaaatgattttgtcgcgacgataatcgaaaaattaccacaaatgtactttgtcgggaaa  
aga  
>MITE\_T\_49694  
ttgaaattgatagacaaagctatagacaaagaagacaaaaaggatatggagggatcctattggtggaagcgggtggttacaatggacaaacga  
ggtagataatagactaaacggcaaccacgagagaccgaaagttagtccaccattttctcttaatccataggagccacccatttcaacca  
ataggatagctccatactccccattaGTCTCCATgccctttgtctatggcttgtctatcaatttcaa  
>MITE\_T\_49701  
attggaccgcgttaaacagaaaggaaccaagtcacatcagcttttgccaaatttaattgggcaatttaatttttacacgaaaacgggtgtgtgaattt  
cgtaaaaatttcagtgaaattttccatagtaagaggcaaattccttaaaactgtcaaaaaaatctgcacaaaccTTCtcccgtaaaaaatcaaatt  
gcccagttgaatttggcaatagctgatgtggcttgggtcctttctgttaaacgcggtccaat  
>MITE\_T\_49704  
attcgtcaccttcaggcaaaagtatcacaagcgatgcgacgtttaaaaattccgccgcattttatttttacggagaaattgttaacgaagct  
gtccgaaaatttactgaatttttctgtgctgccgataaaatttagtgaaatttcaaacagattcaacgaacaatttctcagtaaagaattaaatgg  
cggcggaatttttaacgtcgcgatggcgcttgtgatactttgcctggaaggtgacgaat  
>MITE\_T\_49723  
aatactgccgtgctaaggaaaaacgccgatgaacattcaagagttggcaatttcatctcagaaaacagtttttgaagaagggtatgaatatttt  
ccttgaaattttcaggaatttttgggtgaaattgccaacaaaattatctaaaaaaattggaggaaaaatattacaaatccgaaaatccgtgatttacta  
aaggaaatgtggcaacgcatgaaggttcatacggcggttttcttagcacggcagaat  
>MITE\_T\_49740  
tggtatgcatttcgaaaaaagaaccaggagcACTGccgtgttgctaagattgtgcaactccaCTCTTAGAAATAAACTAC  
TGTAATCGGCAAGTATATGGAatttatgtgaattttgtcttaaatattacagtttttagcgtgtAAAATAGACATTTTT  
TATAGGTGATCAGGTCtcttccaagacaaaagagtTTGCGCGACTTCAGAAACagtgcaatgcttgggttcctc  
tttgcaaaatgcaatcca  
>MITE\_T\_49761

attgaaccgcgttaaacagaaaaggaaccaagccacatcagctattgccaaatttaacagggaaatttcattttctacgagagaacgtctgagcag  
attcctttgagaattgtgaggaatttgctttgtattatggaaaaattcactgaaatttgcacaaaaattcgcacaccgtttcatgtaaagaattaaat  
tactcgattaaattggcaatagctgatgtggcttgggtcctttctgtttaacgcgggtccaat  
>MITE\_T\_49822  
attggaccgcgttaaacagaaaaggaaccaagccacatgagtgattgccaaatttgatcgggcgatttaatttttacatgaaaacgggtgtgcgga  
attttgtgcaaatttcagtgaaatttctccataatacaaagcaaattccttaaaattttctaaggaatctgcacgaacgttctcacgtaaaaataacatt  
tctctgttaaatttggcaatagctgatgtggcttgggtcctttctgtttaacgcggtCCAAT  
>MITE\_T\_49873  
TGAGAGACTTGGAGGACAATGTGCATATGTGcaagtttttaataattgagatattaatgatttcaagtaaaactagtct  
taggtaatgcataattctgtgaaaaagtaGCTCCCTAATTCCAATgtctaagcatcaaaaagtcagtgtaacatttctttcgccataag  
gatccatgtaatttcgaaactcaagcaTACCTATATTTCTCAATATAGCAAAAActccacttatgcgccttgcctccaagc  
ccctca  
>MITE\_T\_49941  
tcgacgggtgaagtcgacaattACATAACTCTATTTGCGAcgtcgtcgcagacttctgtcttactttatttttaaacgaaaaactac  
tcaacggcaattcttaaaactgccgtgattttcttctgtgcggagaaaatttctataaactcaaggaatgatgtcaatttttctctttaaaaaa  
ataacatagagacgggagattttgagacaacgcaaacgaggtatgtgattgcggacttacgccgtcga  
>MITE\_T\_49956  
atctgccgtgctaaggaagaacgccgtatcaacctttaggcgttgccaaatttccttgataaatcacaattttcccgaaaatttgtaacattttctt  
ccaattttcagataattttgttcgcaattttacctaagttctgaatatttctcgaaaaatattcattacttttctcaaaaataaacattttatcgaagga  
catttggcaactctcgaatgtttatcaggcgttcttcttagcacgacagtat  
>MITE\_T\_50026  
ctgccgtgctaaggaagaacgccgtatgaacattcgagagttgccaaattttctcgataaaatgtttattttgaggaaaattatgaataatttcttg  
caatttctggcggttttagatcaaattacaacaaaataatctgaagaaTTGGTAGACAGAATCAGATgttcaaaaatgttctctgaa  
aatcagtgatttgcagggaatttggcaacgcctgaaggctcatcaggcggttttcttaagcacggcag  
>MITE\_T\_50290  
attggaccgcgttaaacagaaaaggaaccaagccacatcagctattgccaaatttaattgggcaatttaatttttaagtaaaaacgggtgcgcggattt  
tcgtgcaaatttcagtgaaaatttccatggtaagaagcaaattccttgaaattttcaaggaaacccgaacaaatgttctctcgtaaaaagttaattg  
cccagttaaacttggcaatagctgatgtggcttgggtcctttctgttaaacctcggtccaat  
>MITE\_T\_50346  
attctaccgtgctaaggaaaaacgccgtatgagccttcagccgttgccaagtaccttcgataaaaacgggaattactgagaaaattatgaatattt  
tttcaaaaatttcagacaattttgtacgcaattttatctgaataatctgaaaatttcaaagaaaaatttgcataaatgtcgtcaaaatacaagtttatcaa  
gggaaatttggcagctctccaatgttcatacggcggttcttcttagcacggcagcat  
>MITE\_T\_50381  
aactgccgtgctaaggaagaacgccgtatgaacattcgagagttgccagatttcttcaataaaatgttcatttctgaggaaagttgtgaacattttc  
ctttggaatttcaggaacttcaggtgaaattgcaaacaacgttatctgaaaaattggacgaaaaatattcctaagttaccagaaaattctgtgtttat  
aaatgtaaatttggcaacgcctgaaggctcatcaggcggttttcttagcacggcagta  
>MITE\_T\_50447  
cactgaaaaaatattggtagaatttaccattccttcacgctgtatttcacagagcgtgaaggaatggtgaatTCTACTCAATTctactcatt  
ttcttttctcaagtcgatttctgccagaggaatggttacctgtaccagtatatacaTACattatagtaacgtttacctttcttctggcagaattgactct  
aaattgacgctgtgtgaaatacagcgtaaaggaatggttaaattctaccaatcttttttttagtg  
>MITE\_T\_50518  
attggactgcgtttagcagaaaaggaaccaagccacatcagctattgccaaaaaccgggcaatttaattttcacaagagagcgtttgtgcggattct  
ttgaaaatttcaaggaatttgccttctactatagGAGGAAagttcacggaaatttgcacaaaaatccactcaaacgttttcatgtaaacgaTT  
AAATTGCCCAAGTAAATTTGGctatggctgatgtggcttgggtcctttctgttaacgctgtCCAAT  
>MITE\_T\_50528  
attggaccgcgttaaacagaaaaggaaccaagccacatcagctatttccaaatttgatcgggcaatttaattttgacatgaaaacgggtgtgcggat  
ttctgtgcaaatttcagtgaaaatttccatggtacgaagcaaattccttaaaattttcaaagaaatccgaaaaacgttctctcgtaaaaatttaattg  
cccagttaaacttggcaatagctgatgtggcttagttcctttctgttaaacctcggtccaat  
>MITE\_T\_50643  
AACtaccgtgctcaggaaaaacgccgtatgaacctccaggcggttgccaaatttctttgataaaaacacaaatttccgagaaaacttatgattactt  
ttctccaattttgcagattattttgttcgcgatttcacctaagttcctgaaaattaaaaaaattcataaatctccttaaaaagatacattttatc  
gtaggaaatttggcaactctcgaatattcatcaggcggttttctcagcacggcagtg

>MITE\_T\_50646

tggttgcttcttgcacaaagggaaccaggagcactgcaatgttgctaagattgtgcaacttctttgtcttagaAAAAAacacctgattatccatt  
aacagtttccattttactcgcataaacggttaaatttaagacaaaaattaccatgtaaatccatattttcatagttccaggaatttcatttcaaaggatg  
aaaatgcacaatcttagcatcattgcaattcttctggtccttttgaaaaatgcaatca

>MITE\_T\_50801

cactggaaaaaaacacattggatctagagtcagactcttgaaaacattgacaagaaaaatactcttgattcaattggattttgttgatcaaaa  
acgaaatccgcttaaattaagaggcttggttcttgatttaagctagattctgattgaatcaagagtagttttctgtcgatgttttaagagctggactc  
tagatccaatgtgttttttttttttttttttttttttttttttctagt

>MITE\_T\_50845

tactgccgtgctaaggaaaaacgccgtatgagcattcgatagttacaaaatttccttcgataaaatgtttattttgaggaaaattgtacatttttctt  
tgaaaattgcagacacttttagatcaaattgcaacaaaattatctgagaaattggtagaaaaatattcaaaaatgttcctataaattagtgattgcctg  
aggaaatttggaacgcctgaaggctcatcggcggttttcttagcacggcagaa

>MITE\_T\_50941

tggaaccgcgttaagcagaaaggaaccaagccacatcggtattgcaaacttaattgggtaatttactttttacacgaaaacggttggtgcggattc  
ttctgcaaatttcagtgaatgttcGCATGggacgaagcaaattcctcaacattttccaggaatccgctcaaaactcgttctctttaataaatta  
agttgccagttaaatttggaatagctgatgtgacttggttcttctgttgaaacgcggtcca

>MITE\_T\_51119

tactgccatgtctacggaagaacgccgtatgaaccttcaggcggttgccaaatttcctttgataaatcacgaattctctggaaaattgtcgatattttct  
tccaattttcacatattttttcacaatatcACCgaagtttcaaaaatttcaaaggaaaaatattcttaactttcctcaaaaatacacattttatcga  
aggaaatttggaacctcttgatgttcatacggcggttttcttagcacggcagtt

>MITE\_T\_51273

TCGTCACCTctctggccaaagatcacaaagcgccatgtgacgtttaaaaatttcgcgcgcattttattttttacaaaaaattgttcaacaaag  
ctgtccgaaaatttcactgaattttctttgtctcccgatcaaattcagtgaaattttcaaatagactCAACcatcaatttctctgtaaagaaacaaa  
atggcggttggaatgtttaaacgtcgcataatggagctgtgatactttggccggaaggtggcga

>MITE\_T\_51284

tgctgccgtgctaaggagaacgccgtatgaaccttcaggcggttgccaaattgcctttgataaaaaacgaatttcctggtaaactcgtgaatatttt  
cctccaattttcagataattttgtctcgcaatttcaccgaaaagttccacaaatttcaagggaaaaatattataacttcctaaaaaatgaacgtttatc  
gatggaaatttggaactctcgaatgttcatacggcggttcttcttagcacggcagta

>MITE\_T\_51393

ttctgccgtgctaagggaacgccgtatgaaccttcgtacgttgccaaatttcctccaataaaaaaccgaatttactgagaaaattgtgcataCTT  
GTTTCCATAACTTTCACACAatgttttacgaatttaatactaaaatatctgaaaacttcaaggaaaaatgcataaatttcgtcaaa  
aatacatgtttatcggaggaaatttggaactctcgaatactcatcgggtgttttcttagcacggcagta

>MITE\_T\_51546

tactgccgtgctaaggagaacgccgtatgaacctttaggcgttgccaaatttccttaggtaaataacgaatttgcaaaaaattgtaaatattttct  
tccaatttatcagataattttgttggaattttacctaagttctggagaaatttctcgaaaattattcataactctcctcaaaaatacataatttatcga  
ggaaatttggaactctcgaatgttcatacggcggttttccgtagcacgggaGCA

>MITE\_T\_51595

TCGACtgtgaaactgcaaaccacgtatctcggttgacgcttgagacttactgtcaaactttaatttttaaaagaaaaactactcaGCGT  
TCcggttcaaaatttctgcgattttctgtctgtgaggagaaaattctgcgaaaacttcacaAAATAATGTTGATtcgctttcaaaaa  
aaaaaaagtaaaatgggagccgagatttttaacagcgtaaacgagatgcgtgggttgggagttccaccgtcga

>MITE\_T\_51743

tgctgccgtgctgaggaagaacgccgtatgagccttcaggcggttgccaaatttccttagacaaACCAcgcgttttcaggaaaattgtgaatgg  
ttttttccaatttgaagaggattttgtcgagatttttcaaaaagctgaacatttcaaggagaattatgcataactttctcaaaaaataaatgtttatc  
cggggaaatttggaactcccgaatgttcatacggcggttcttcttagcacggcagta

>MITE\_T\_51817

tgctgtcgtgctaaggaaaaacgccgtaagaacattcgagagttgccaaattttctcaattaaatgtttattttgagaatagttatgaatattttcctt  
gaaatttccatgacttttcgatggaattgcgatcaaaattatctgaaaaatttgggaaaaatatttataagttctccaggaaattcgtattttatcaa  
gaaacttggaacgcctggaggttcatacggcggttttcttagcacggcagaa

>MITE\_T\_51834

cactggaaaaaaaaaaaaaaaaaaaaaaaaaaaaaaaaacattggatctagagtcagactcttgaaaacatcgacaagaaaaag  
gactcttgattcaatcagatttaagcttaaatccaaaggaaatccgctcaaatgaaggagcttggttcttgatttaagcttaaatctgatcgaatcaag  
attatttttctgtcgatgttttaagagcttgactctagatccaatgtgtttttctccagt

>MITE\_T\_51854

tactgccgtgctaaggaaaaacggcgcagccttcagacgttgccaaattccctcgacaaatcacgaatttcggaagcATTGTAA  
TATTATACCTccgattttaagagaattttgttcgtaattagatctgaaatttgtaaaatttaaagggaataatcataagttaataaaaaata  
gatattctctgagaggaaagttggcaacgcctgaaggctcatagcggttttccttagtacggcgagca

>MITE\_T\_51883

ttctgccgtgctaaggaaaaacgccgtatgaatattcgagagttgtcaaatttcctcgataaaatgcttattttgaggaaagtcagatattttcc  
gataaattttcaagacttttaggtaaaattgcgaacaaaattatctgagaaattggaggaaaaatatttcaaaattttcccaaaaattcgtgatttacc  
aaggcaatttagcaacgccttaagggttcatacggcggttttccttagcacggcgagta

>MITE\_T\_51899

tcgtcaccttcaggcaaaagtatcacgagcgccatgcgacgtttaaaaaatttcgccaccattttattttttcacggagaaattgttggtgaatccgtt  
tgaaaaattcactgaattttatcggcagcgcaaagaaaattcagtgacattttcgacagccttagTTGAACaatatttctgttaaaaaataata  
tgccggcggaatttttaaacgttgcaaggcgcttgatactttggccggaaggtgtcga

>MITE\_T\_51921

cactggaaaaaaaaaaaaaaaaaaaaaaaaaaaaaaaaNcacattggatctagagtcagactcttcaaaacatcgacaagaaaaaat  
actcttgattcaatcgatttttgctaaatcaagaaccaagcctctaatttgagcggatttccttttgatttaagcaaaaatccgattgatccaagagt  
atttttctgtcaatgtttcaagagtctggactctagatccaatgtgttttttttcagtg

>MITE\_T\_51934

ctgccgcgctaaggaagaacgccgtatgaacattcgagagttgccaaatttcctcgataacttatgtattttgatgacattcatgcacattttcctt  
gaaattttcagatatttttagattgcaTTACGTAGAAAACCTGTgcgaaaatttggaaaaaaatattcacaattttccagtaaatccggt  
ttttatcgaggaaacttggaaccgtctgaaggctcatagcgcggttcttccttagcacggcgag

>MITE\_T\_51966

Tattgccgtgctacggaagaacgccgtatgaacattcaagagttgccaaatttcctcgataaaatgtttattatcaagaaaagttatgaatattttca  
ttgaacttttcaggaactttatgtgaagttgcgaacgaaattgtctgaaaaattggaaggaaaatgttcataagttactgggaaattcatgtttatca  
aaggaaatttggaacgcctaaagggttcatacggcggttttccttagcacgacattG

>MITE\_T\_52116

tgctgccgtgctaaggaagaacgtcgatgagccttcagacgttgccaaatttcctcgataaaaacctaatttactgcggaaagtgtgaatattttg  
ttccaaattttcaacaatttcgttcgcactttaatttaaaatatctgagaattttaaggagaactatgcataaatttcgtaaaaaatacatattttaacca  
gggaaatttgacaactctcgaatgttcatacggcgctcctccgtagcatggcgagta

>MITE\_T\_52291

ttctgccgtgctaaggaagaacgccgtatgagccatcaggcctttgccaaatttcctcgaaaaattacgaattttccggacaattttgggaatattttc  
ttccgatttctcagaggatttcgttcgtaatttgatctaggaagtctgaaaaattcaggtaaaaaatattataactttctcaaaaaataaatatttctgtggg  
aggaaatttggaacattcgaatgttcatacagcggttttcctaagcaagGCAGTA

>MITE\_T\_52327

TTAAATTtagaggcttgaggacaaggcgcataaatgtagttttgtaaaaaattgagatattaatgatttcattcaaaactaGTCTcattg  
catattctgtgaaaaattcgatcaaaattccacttttaagcatcaaaaagtcagtttgaaacttttccgccacaaggatccatgcaattttgaaact  
tcatatttctgaaattggcaaaaactgcacttatgcgcctgtcctccaagccccctcatftaa

>MITE\_T\_52697

tactaccgtgctaaggaagaatgccgtatgaacattcgagagtcgccaaatttcctgcccgaataattatttttgaagaaagtcagagatttttc  
attgaaattttcaggaaacttttaggtgaaattgcgagaaaaattatcgaaaaatcgaggagaaaaatattcacaactttccctgCAAATTCGA  
TTTTgatcaaaaggaattttggcaatttctgaagggttcatacggcggttttcctaccACGGCAgca

>MITE\_T\_52712

gtaattgaatcgggacgtgcgaaaaccgctaattgtccattttccagtccttatgTTCTTCTGAGTTGATAGTACTTTTTTGGGA  
GTTGGTTGCGGCCACGAAAGTGCGTTAAACTCGTCTTCGGGTTTTCTTAATCCCAAA  
ACGAatcctttcatcactttgtGGTTGTATtaactctttaaagattatcaactcaaaaaaacttcgGACTGGAAAATGGA  
CaatagcggttttcgcacgcccCGATTCAATTC

>MITE\_T\_52725

CACTGCCaagctaagggaacgccgtatgaacattcgagagttgccaaacttccaggataaaacatgaatttttaggtaatttatgcac  
atcgttccttgaaattgccagatacttttagattaaattgtgtaacaaattttccgaaaaatttgaaagaaatataCCAacagattccttgaaaattcgt  
atttcctcagaggaaatatggcaacgcctgaagggttcatacggcggttcttccttagcacggcgagta

>MITE\_T\_52777

TCGTCTGtgcgccgacgaagggaacgtaactccattccaagggttgcaaaattgacgcaacaattcaattttgtacAAGATTATAG  
CTGTAAAATTTTGGCCcaaacttttctgattttgcatgagatccgaagaaaaatcagtgaatttcagtcagaaactttcaatttc



tccTCATAAATGTGGAATTcgctaggggaaatttggcaacattagaatgtaGTTACGTGCTTTCGTGGGGAAC  
GACGACGA  
>MITE\_T\_52839  
tcgacggtgtaagtcggcaatcacataactcgttctgtgtctgaaaatctccgcctctatgttactttttaagaggagaacaaattgacatgattc  
cttgaagttttgcagaattttcttcgcacagagaagaaaaatgatggaaattttaaagaattgccgtgtgtagttttcgttaaaaaataaaatatga  
taggaagtttgcgacgtcgcaaaccgagttatgtgattgccgacctacaccgtcga  
>MITE\_T\_52943  
cacggaaaaaattaaatcgctgatttaacaattcaattgctaaaaaaaaaaaaaaaaaaaaaaaaaaaaaagactgcaatgtttcaatgtagatt  
ttaaacacaaaaatgctactttaaccacccctttgattaaattagcttgcagatagtggttaaagtagcattttttgttgcaaaatctagggtgaaacg  
ttgcagtcacttttttagcaattaaattgttaaatacagcaatttaattttccgtg  
>MITE\_T\_53329  
atctgccgtgctaaggaagaacgccgtatgaacattcgagagttgccaaatttccctcagaaaaatgttacttttgaagaaagttagtacttctc  
cttgaacttttcgggaacttttaggtgaacttgagaacaaaattatcggaataattggagtaaaatcttcacaattttccgaaaaattggtgatttacc  
gaagaaaaatttggcaacgtctaaaggttcatacggcggttctccttagtacggcagt  
>MITE\_T\_53348  
tgctgccatgctaaggaagaacgccgtatgaacattcgagagttgccaaatttccctgataaaagcATGTCTTTTTTAATGAAAGT  
TATGCGTTTTTAcgcttgatattttcagatatttttagattaaattgtaaacaaaattgtctgtaattttgaaaaaatatgcaaaattttGCA  
TATGCAGTAAGTTTCATTGagtgaatatggcaacgtctgaaggtttatacggcggttctccttagcactgcagta  
>MITE\_T\_53470  
actgccgtgctaaggaagaacgccgtatgaacattcgagagttgccaaatttccctagataaaacatgtattttgacgacatttatgcacatttatctt  
tgaaattttcagacatttttagattgaattgcgtacaaaattgtctgaaaattttggggaaacatattcacaagttacaaggaaaattgtgtttatcaaag  
gaaattcggcaacgcctgaaggttcatacggcggttttcccttagcacggcagat  
>MITE\_T\_53570  
CATAGGCTACTAGTTCCAAAGTGTACAATATATGTCCATGAAAGTGATTCGTCACAAAAA  
CGCAATATAACTGCTTTGGGTACTGTCCGTTTTGCTGCGGCCTACCTTCTTAATACTGCTA  
ATTAAAAAGGATTTTGGCTGTTTTGGCACACAATTAAATTACTTTCCGATTCTTCTTAATG  
ACTGATCAAAAATCCACTCCTAACTCAATTTTCGACCAAACCTGGACATTGTACTCTTTGAA  
ACTAGTAACCTCAG  
>MITE\_T\_53649  
ttatgaggggcttgaggacaaggcgcataaaagctgttttgaagaattgagatattaatgatttcaagttaaaCTAGTCTGACTGCa  
tcttctgtaaaaaattcgtctccaaattccgactttaagcatcaaaaagccaattcgaacttttccgccataaggatccatgaatttcgaaactc  
aaacacgtatttcccgaagtagcaaaaactgcacttacgcgcctttgTTCTCCAAGCCCATCATA  
>MITE\_T\_53667  
ttctgccttgctgaggaagaacgccgtatgaacattcgagagttgccaaatttacctcgataaaacatgtattttgacaGAATTcatgagatttt  
ctctgaaattttcagatatttttagattaaagtgcgtacgaaattgtctgagaattttggaatataatattcgtattttcccggtaaataccggttttatcgg  
gaaaaatttggcaacgcctgaaggctcatacggcggttctccttagcacggcaaaa  
>MITE\_T\_53750  
cactgggaaaaaaaaaaaaaaaaacaaaaacaaaaaaaaaacacattggatctagagtccagactcttaaaaacatcgacaagaaaaaac  
tcttgattcaatcagatttaagcttaagcaagaaccaagtctctaatttgagcggatttccctttaatttaagcttaaatctgattgaatcaagagtcct  
tttctgtcagatgtttcaagagctcggactctagatccaatgtgttttttccagt  
>MITE\_T\_54047  
TCGAGGGAGTAAGTCCGCAACctatatcttggttgcgacgtggcagacttctgtcactttattttcaaacggaaaacta  
ctcaacggcaattctttaaactgccgtgatttttcttctgtgcgaagaaattctgaaaaactcaaggaatgatgtcagttgttctctttaa  
aaacacaaaagaggcagagattttcagacaccgcaaacgagatacgtggttgcggacttacgccgtcga  
>MITE\_T\_54100  
TCGTCATTTTCTTTACGAAGGAACGTATCTAacttcaatgttgccaaatttccctcgcatattgcacttttacaagaaa  
aatcttgggcaatttcttaCTGcagattttaccaattttacctctgatctcaagcaaaaaatcaacaaaaattggacaaaaattgcacggatattct  
tgtaaaaaatcgaattgttagagtcaattttgcatccttgattggagttgcgttcttcgagcgggaaacgacga  
>MITE\_T\_54205  
tcgacggtgaaactaccagaccacgtatctcgtttgcggtgtttaaaaatctccactcacattttatttttgaaggagatcaaatcaatatcattcctt  
acaattttcacagagttttctccgcacgaagaggaaaaatcacggaagttttacgaattgacgttgagtagtttctatctaaaaataaagtatggc  
aggaagtctgcgacgtcgaaaccgagatacgtggttggttagtttcaccgtcga

>MITE\_T\_54386

ctgccgtggaaggagaaacgccgtaaggacattcgagagttgccaaatttcctccaataaaatgttcatttttgagtagagtaaatattttctct  
tgaaatttcagatagtagatctaattacaaagaaaagctctgaaaaattgaatggaaaaataatccacaagttttcttgaaaattcgtaagtga  
tcaaaggaaatttggcgactaacgaaggttcatacggcggttcttctagcacggcag

>MITE\_T\_54390

tcgacgggtgaagtcgacaatcacataactcgatttgcgacgtcgcggaacttcctatcatacttcatttttaaacggaaaacaactcaacggctatt  
ctttaaactgcaatgatttttcttctccatgcgaagaaaattctgcaaaaattcaaggaatgatgtcaatttggtctcttttaaaaaaatcatagag  
gcggagattttcagataccgcaaacgagttatgcgattgccgacttacaccgtcga

>MITE\_T\_54517

tcgacgggtaaaactacaaaccacgtatctcggttgcgacgtcgagacttcctgccatactttatttttaaatggaaaactacttaacgtccagttt  
tgaaaaattctgtgatttttcttctcggtgcggagaaaattctgtgaaaaattcaaggaatgatattgatttggtctacttcaaaaaataaatgtgagc  
gtaaatttttaacaccgcaaccgagatacgtggttggtagtttcaccgtcga

>MITE\_T\_54756

ACCCATATATGCCCATGGCTCGTTAACGACTCATCGCAGTTTTTGGACTCTTAGTGTTAGTG  
taaattaggaatttcattgTGTTC AACACAGGATAATCCATGTCTGGGATATAGCGaagcctattttattttgtgt  
gccTCAAAACGTCTTTACCCTGTCTACATAACGTCAAAAAACagcaagtaataaaaaaaaaaaaaaaaaaaaa  
aaaaaaaaaaaaaaaaaaaaaaaaaatagttttgggcATATATGAGT

>MITE\_T\_54783

tcgacgggtgaaactacaaaccacgtatctcggttgcgggtgttaaaaatctacgctcgcatttatttttgaagtcgaccaaatacatatcattctt  
gaaatttcacagaattttctccgcacaaagagggaaaaatcacagaaatttcaagactggatgttaagtagttttcatttaaaaaataatgtatgaca  
ggaagtctgcgacgtcgaaaccgagatacgtggttggtagtttcaccgtcga

>MITE\_T\_55053

ctgccgtgctaaggaagaacgcccatgaaccttcaggcggttgccaaatttcttggtaaatcatgaatttgcagaaaatttgtaaatattttccttc  
aattttcagataattttgttcacaattcaaCCTAAgattcctgaaaatctcaagaaaaagattcataacttctcaagaatttgagattttctga  
gaggaaatttggcaactctcgaatgtttatacgacgtttatccttagcacggcag

>MITE\_T\_55382

tcgacgggtgaaactacaaaccacgtatctcggttgcgacgtcgagacttcctgtcatacattatttttaaatgaaaaactacttaacgtctagtct  
tgaaaaattctgtgatttttcttctcggtgcggagaaaattccgtgaaaattcaaggaatgatattgatttggtcgacttcaaaaaataaatgcgag  
cgtagatttttaaacaccgcaaaccgagatacgtggttggtagtttcaccgtcga

>MITE\_T\_55417

tcgacgggtgaagtcggcaatcacataactcggttgcgacgtcgagacttcctgtcatactttatttttaaatggaaaactactcaacggccatt  
ctttaaactgtcatgatttttcttctcgatgcgaagaaaattctgcaaaaactcaagaaataatgtcactttgttctctttacaaaaatgacgtagag  
acggagattttcagacaccgcaaaccgagttatgtgattgccgactttaccgtcga

>MITE\_T\_55420

ctgccgtgctaaggaaaaacgccgtatgaaccttcaggcggttgccaaatttcttggataaaacgcgaattttctggtaaattaatgaacattttgctc  
ccaattttcagataatttagttcgcaattttacataagattctgaaaaataaaggaaaaatattcataatttcttaaaaaatagacattttatagaagt  
aaatttggcaactcgtattgttcatacggcgcttctccttataGCACAGCAG

>MITE\_T\_55430

tggacgggtgaagtcggcaatcacataactcggttgcgggtgtgaaaatctccgcctctgtgtatttttttaaagagaacaaattgacatcattcc  
ttgaagttttgcagaatttttcttctcacagagaagaaaaatcaccgcaattttaagaattgccgttgagtagtttccgttataaaaaataaatatgac  
aggaagtctgcgacgtcgaaaccgagttatgtgattgccgactttaccgtcga

>MITE\_T\_55548

tcgacgggtgaaactacaaaccacgtatctcggttgcgggtgttaaaaatttacgctcacattttatttttgaagtagaccaaatcaatttcattccttg  
aaatttcacagaatttttcttcgcacgaagaggaaaaatcacagaaattctcaagattggacattaagtagttttcatttaaaaaataaagtatgaca  
ggaagtctgcgacgtcgaaaccgagatacgtggttggtagtttcaccatcga

>MITE\_T\_55594

tcgacgggtgaagacGGCAATCACGaaactcggttgcggcgctcgagacttcctgtcatactttatttttaaacggaaaactactcaac  
ggcaattctttaaactgccgtgatttttttctgtgcgaagaaaattcgcaaaaactcaaggaatgatgtcaatttggtctctttaaacaataa  
catagaggcggagattttcagacaccgcaaaccgagatatgtgattgcggacttgcgCCGTTGA

>MITE\_T\_55658

tcgacggtgaaattaccaaacccacgtatctcggttggttaaaaaatctacgctcacattttctttttgaaatagaccaaataaatatcattcctt  
gaaattttcacagaattttcttcgcacgaagaggaaaaatcacagaaatttcaagactggacattacgtagttttcatttaaaaaataaagcatgac  
aggaagtctgcgacgtcgaaaccgagatacgtggtttggtagtttcaccatcga  
>MITE\_T\_55681

tcgacggtgaaactaccaaacccacgtatctcggttggttaaaaaatctacgctcacattttattttttgaagtagaccaaataaatatcattcctt  
gaaattttcacagaattttctccgcacaaagaggaaaaatcacaaaaatttcaagactggacgttaagtagttttcatttaaaaaataaagtagatgac  
gggaagtctgcgacgtcgaaaccgagatacgtggtttggtagtttcaccgtcga  
>MITE\_T\_55763

tcgatggtgaaactcccaaagcacgtatttcggttgacgctgcgagacttctgtcatacttaatttttaacaggagCACTTCacaacgtca  
attcttaaaacctctcgattttctctatgcGTGAAGGAAATTATGTGAACATTTCatggaataatgttgattgttcttctc  
acaaaaataaaaagggaagcggagatttgaacaccgtaaaccgagatacgtggtttgggagtttcaccatcga  
>MITE\_T\_55998

tcgacggtgtaagtcggcaatcacataactcggttggttgaaaaattccgcctctttgttttttaaaaggagaaaaaattgacatcattcctt  
gaagtgtatgcagaattttcttcgcatagagaagaagaatcacggaagttaataaattgccgttgagtagttttccgtttaaaaataacgtgtgac  
aggaagtctgcgacgtcgaaaccgagttatgtgattgccgacttacatcgtcga  
>MITE\_T\_56029

tcgtcaccttcaggcaaatcacagaacgcgcatgcgacgtttaaaaattccgcgcctatttttttactgagaaattgttggtgaatctggtt  
gaaaatttcactaaattttatcggcagcacaaaaggaaaattcggtgaaatttcggacagcttcgtgaacaatttctctgtaaaaaataataaggcgg  
cggaaattttaaaacgtcgcattggcgcttgatactttgcctggaaggtgacga  
>MITE\_T\_56088

tcgacggtgaaactaccaaacccggtatctcggttggttgaaaaatctacgctctcattttattttttgaagtcgaccaagtcaaatatcattcctt  
gaaattttcacagaattttctccgcacaaaaaggaaaaatcacagaaatttcaagactaaacgttaagtagttttcatttaaaaaataaagtagatcac  
aggaagtctgcgacgtcgaaaccgagatacgtggtttggtagtttcaccgtcga  
>MITE\_T\_56137

Tcaacggtgaaagtccgcaatcacataactcggttgcccagtcgcagacttctgttatacttatttttacacgaaaaactactgaacggcaatt  
cttaagactgccgtgattttctctctgtgcgaggaaaattctgcataaactcaaggaatgatgtcaatttggtcacctttaaaaataaacatagag  
gtggagattttcagacactgcaaaccgagatttgtgattgccgacttacgctgtGA  
>MITE\_T\_56220

TCGACAGCGTAAGTCCGcagtcacatatctcggttggttgGAAAATCTCctcctctatgttatttttttaaaaggagaaac  
aaattgacatcattccttgaagtgtatgcagaattttcttcgcacagagaataaaaaatcacggcagatttgaagacttgccgttgagtagttttccgttt  
aaaaataaaagtatgacaggaagtctgcgacgtcgaaaccaagtattgtgattgctgacttacaccgtcaa  
>MITE\_T\_56474

tcgacggcgtaagtcacacaATTACATATCTAGTTTGCggtttctgaaaatctccgcctctatgttattttttgaatgagaacaaattga  
catcattccttgaagtgtttgcagagtattcttcgcacagagaagaaaaatcatggcagtttaagaattgccgttgagtagttttccgtttaaaaaat  
aaagtatgacaggaagtctgcgacatcacaaaccaagtattgtgattgccaaacttacaccatcga  
>MITE\_T\_56525

tcgacggtgaaactaccaaacccacgtatctcggttggttgaaaaatctacgctcgcatattttttttgaagtagacaaaaataaatatcattcctt  
gaaattttcacagaattttctccgcacgaagaggaaaaatcacagaaattttaagactggacgttaagtagttttcatttaaaaaataaagtagatgac  
aggaagtctgcgacgtcgaaaccgagatacgtggtttgatagtttcaccgtcga  
>MITE\_T\_56736

tcgacggtgtaagtcggcaatcacataactcggttggttgacgctgcgagacttctgtcatacttatttttttaaatggaaaactactcaacggcaattc  
tctaaaccgcatgattttcttctcaatgcaagaaaaattctgcaaaaactcaagaaataatgtcaattcgttctctttaaaaaaatgacgcgga  
ggcggagattttcagacaccgcaaaccgagttatgtgattgccgactttaccgtcga  
>MITE\_T\_56745

tcgacggtgtaagtcggcaatcacatatctcggttggttgaaaaatctccgcctctatgttatttttttaagaagaacaaattgacatcatcctt  
tgaagtgtttgcagaattatcttcgcacagagatgaaaaatcaaggcgggttttaagaattaccgttgagtagttttccgtttcaaaaaataaagtagga  
caggaagtctgcgacgtcgtaaccgagttatgtgattgccgacttacaccgtcga  
>MITE\_T\_56748

tcgacggtgaaacttccaaatcacgtatctcggttcgagtggttaaaaaatctccacttccattttacttttgacagGTGAACGAATTAAC  
ATCATTCTTTgaggttttcacagaattttctctgcacgaggaaaaaatcatggcagtttttaacattggctgtggagtagttttccatctata  
aaataaaatcaggcaaaaattctgcaacgtcgcaaacgcgatgtggtttgggagtttcaccgacGA  
>MITE\_T\_56842

tcgacggtgaaactaccaaaccacgtatctcggttgcggcggttcagatttctgtcatacatcatttttaaatgaaaaactactcaacatcaatgc  
ttgaaaacttcataatttttcttcttcttgcgaagaaaactctgcgaaaacttcaaggtataaaatagattgtttccgctgaaaaataaaatggga  
gcagagattttgaaacaccgcaaacgagatacgtggctagtagttCCATCGTCGA

>MITE\_T\_56896

ccgccgtgctaaggaagaacgtcgaagagcttcagacgttgccaaatttctttgacaaatcactaattttcaagaaaatttgtagtattttcttc  
catttttcaagtaattttcttagtaatttgatctaaaaagtcgaaattttcaaggaaacatatcgacaattttctcaaaaaataaacattttattgggtgaa  
aatttggcaactctcgaatgttcatacggcggttcttcttgcacggcagtg

>MITE\_T\_57023

tcgacggtgaaactaccaaaccacgtatctcggttgcgggtgttaaaaatctacgcccgcattttattttttgacgtagaccaaataaatcattcctt  
gaaattttcacagaatttttctccgcacgaagaggaaaaatcacagaaattttcaagactggacgttaagtagttttcatttaaaaaataaagtatgac  
aggaagtctgcgacgtcgaaaccgagatacgtgggttgtagtttcaccgtcga

>MITE\_T\_57041

tcgacggtgcaagtctgcaatcacttaactcggttgcgggtgtctgaaaatctccgcaactatgttatttttaaggagaaacaaatggacatgattcc  
ttgcagttttgcagaatttttctcgcacatagaagaaaaatcacggcagtttatggaattaccgttgagtagttttccgtttaaaaataaagtatga  
caggaagtctgcgacgtcgaaatcgagttatgtgattgccgactttcaccgtcga

>MITE\_T\_57262

tcgacggtgaaactaccaaaccacgtatctcggttgcgggtgttaaaaatctacgctcgcatattttatttttgaagtagaccaaataaatcattcatt  
gaaattttcacagaatttttctccgcacaaagaggaaaaatcacagaaattttcaagactggacgttaagtagttttcatttaaaaaataaagtatgac  
aggaagtctgcgacgtcgaaaccgagaaacgtgggttgtagtttcaccgtcga

>MITE\_T\_57457

tcgacggtgaaactactagaccacgtatctcggttgcgtgtgttaaaaatctccactcacattttatttttgaaggagatcaaataaatcattcctca  
caattttcacagatttttctccgcacaaagaggaaaaatcacgaaagtgttcacGAACtgactttgagtagttttctatttaaaaaataaagtgtga  
caggaagtctgcgacgtcgaaaccgagatacgtgggttgtagtttcaccgtcga

>MITE\_T\_57566

tcgacggtgaaactaccaaaccacgtatctcggttgcgacgtcgcaggcttctgtcactttatttttaaatgaaaaacaactaacgtctagtc  
ttgaaaatttctgtgatttttcttcttgcggagaaaattctgtgaaaatttcaaggaaatgatattgatttggctgacttcaaaaaataaaatgcgag  
cgtagatttttaaacaccgcaaaccgagatacgtgggttgtagtttcaccgtcga

>MITE\_T\_57572

tcgacggtgaaactaccaaaccacgtatctcggttgcgggtgttaaaaatctacgctcgcatattttatttttgaagtagaccaaataaatcattcctt  
gaaattttcacagaatttttctccgcacaaagaggaaaaatcacgaaattttcaaaactggacgttaagtagttttcatttaaaaaataaagtatgac  
aggaagtctgcgacgtcgaaaccgagatacgtgggttgtagtttcaccgtcga

>MITE\_T\_57594

tcgacggtggaaccaccagaccacgtatctcggttgcgacgtcgcagacttctgtcacttcatttttaggtggaAAACGACTCAA  
CGTCAATGCTTGAAAACTcccgtgattttcttcttgaGTGACGAAAAAGCTGCGAAAACTTCGAGG  
GTTGACAGTGGATTGTTCTCCttcacaaaaatgaaatgggagGAGAGATGTtgaacaccgcaaataagatacgtgg  
tctggtagtttcaccgtcga

>MITE\_T\_57610

tcgacggtgaaactaccagaccacgtatctcggttgcgggtgttaaaaatctccactcacattttctttttgaaggagatcaaataaatcattcctt  
acaattttaacagatttttctccgcttaaaaggagaaaaatcatggaagtttcacgaattgacgttgagtcgtttctatttaaaaaataaagtatgacag  
gaagtctgcgacgtcgaaaccgaaatacgtgggttgtagtttcacgtcga

>MITE\_T\_57688

TCGACGCTGTAAGTCCGCGACCACGattctcggttgcgacgtcgcagacttctgtcactttatttttaaatggaaaact  
acctAACGGCAAatcttgaaaactgccgtgatttttcttcaaggtaagaaaatttctgaaaacttcaagaatgatgtcgattcgttctc  
cttaaaaaataaaataggtgcggagatttttaataaccgcaaaccgagatacgtgggtgcggacttacaccgtcga

>MITE\_T\_57740

tcgatgggtgaagtcggcaatcacataactcggttgcgacgtcgcagacttctgtcactttatttttaaatggaaaactactcaacggcaattct  
ttaaaactgtcatgatttttcttctccattcgaagaaaattctgaaaaacttcaagaaataatgtcaattgttctcttttaacaaATGACGtaca  
ggcggagattttcagacaccgcaaaccgagttatgtgattgccgactttctccgtcga

>MITE\_T\_57932

ctgtcgtgctaaggaaaaacgccgtatgagcatttaggcgttgccggatttcttcaataaaataccgaatttacttgggaaatcttgaatattttcttc  
aaagtttccgaaaaatttgcctgcggttttcttgaatgtctgaaaatttcaaggaaatatgagaataggttctcaaaaaatatagaGTTTatgc  
agggaaatttggcaactctcgaatgtccatgcggcggttttctcggcacggcag

>MITE\_T\_57959

ctgccgtgctaaggaagaacgcgcatgaacctcagacgttgccaaatttccttcggtaaatcacgaatcctcgggaaaattcggaaatattttc  
ttcaattttcagataattttgtttacaatttcacctaaggtcctaaaaattcaaggaaaaatcttcgtagctttcctcagaaataaacattttatcgga  
aaaaaatttgcaactctcgaatgttcatacggcggttaacCCTTAGCACAGTAG

>MITE\_T\_57965

ctgccgtgctaaggaaaaacgccgtatgagccttcagacgttgccaagtttccttcgataataactgaattattagaaaaattgtgaatattttcca  
aaatttcagacaattttgcatgcAATTCAATCGaagacatctgaaaattcaaggaaaactatgcaaAACTTTATTACAAA  
TACATATGtcttttcgaggaaatttgcaactctcgaatgttcatacggcggttttccttagcacggcag

>MITE\_T\_58014

tgaggacttatctgcaataatggcggatgtgaaaaattaccttttcgaaacacatccaaaaaactgttttagcatcgagaaaattttgagaaaattctt  
gagatgtgatcttcgagatctgtacatcatgccagagccaaacataattaaattttgtgtgaacaaaacagtttttaagcgtgttcgaaaaggtaatt  
ttcacatccgctattgtgtgtgtgtgtatattgttacatataaggcctca

>MITE\_T\_58116

ctgctatgctaaggaaaaacgccgtatgaacctccaggcggttgccaaattttctctgataaaatcacgaattattgggagaaaattgtaaatttttcctt  
ccaatttcagaaatattttgttgacatttaatactaaaatatctgaaaattttaggggaaaaataataaaatttcgtcaaaaatatatgttcattcgggg  
aaatttggaactctcgaatgtacatacggcggttttccttgccacggcag

>MITE\_T\_58127

attggacggaggttaaacagaaaggaaccaagccacatcgggatcgaaccgagaaaaagagggttaaaagtttggtcctgcataagactcaatgt  
aaaagataaactcaagttcaattttctgcaaaagttgtccaacaaaaactttgaatttttgcgatagatagtagagcaatgggtgagttcaaaacc  
actcataactcaatttttcccaaaatgtgggttggttcctttctgcttaactcagttccaat

>MITE\_T\_58238

ctgccgtgctaaggaagaacgccgtatgagccttgagacgttgccaagtttccttcgataaaaaaccgaatttcataaggaaaattgtgaatattgtt  
tccaaaattttcagacaatttttatgcaagtaataaaaaactgtttgaaaatttcaatgagaaaaatccatgaatgtcgtcaaaaatacatgttttaaca  
cgggaaaatttggaactctcgaatgttcatacggcggttcttccttagcacgacag

>MITE\_T\_58444

acCCTCTacggcatgaattaattttggatctcagatcaTAGGGGACAGCgggacactaatctattttgcaGCTTGCATAAG  
AAAAATAGAGTACCAatgttgtttgaaaattttaaggttaagggaattaattttcaaaaaagaaaaaaactaatgacATTTTG  
CAAAGTCATTGCGCaggggaaagattcaatttataaaaaccccGAACATACGTTGTTACAAATTTCGTAATG  
TTTTGCCATAGACGGT

>MITE\_T\_58491

ctgccgtgctaaggaagaacgccgtatgagcattcaggcgtagccaagtttccttcgataaaaaaccgaatttactgggaaaattgtgaatattttc  
cccgaattttcagactattttgtacgcagtttaattctaaaatatctgaaaatttcaaaaaaaaaaaggcatgaatgtcgtcaaaaatacatgtttcat  
caacgaaaattaggcaactctcgaatgttcgtacggcggttttccttagcacgacag

>MITE\_T\_58828

ctgccgtgctaaggaaaaacgccgtatgagcattcgagagttgccaaatttccttgctgaaatgtttattatgagaaaaattatgaatattttccttg  
aaatttcaggaaacttttagattaaatacaaagaatattccctgaaaaattggaagaaaaatattcataagtttacaaggaaattcgtgtttatcgaag  
gaaatttggaacgcctgatgggttcatacggcggttttccttagcacggcag

>MITE\_T\_58860

attggactgagttaaacagaaaggaaccaacccacattttggaaaaaattgagttatgagtggtttgaacttaaccactgctctactatctatcgcc  
aaaaattcaacgtttttgttgagcaattttgcagaaattgaactgaagtttatctttacattgcgTCTTATGCaagagccaaactttaaac  
tcttttctcgggttgatcccgatgtggcttggttcgttttaactccgtccaat

>MITE\_T\_58917

ctgccgtgctgaggaaaaacgtcgtatgaacctcaagcgttgccaaatttcatttgataaaatacaaattccctggtaaatttaagaatattttcctcc  
caattttcagataatttagttcacaattttacctgaagattctgaaaatctcaaggaaaaatgttcttaacttctcaaaaaagaacattttatctaagg  
aaatttggaactctcgaatgttcatacggcggttcttccttagcacggcag

>MITE\_T\_58928

attggacggaggttaaacagaaaggaaccaagccacattgggatcagccgagaaaaatagggttaaaagtttggtcctgcataagactcaatgt  
aaaagataaactcaagttcaattttctgcaaaattgtctcaacaaaaactttgaagtttggtgatagatagtagagcagtggttgagttcaaaacca  
ctcataactcaatttttccaaaatgtgggttggttcctttctgcttaactcagttccaat

>MITE\_T\_59017

attggactgcgtaagcagaaaggaaccaacccacattttggaaaaaattgagttatgagtggtttgaactcgaccactgctctactatccatcgc  
caaaaattcaaagttttgttgagcaaattttgcagaaattgaacttgaaagtttatctttacattgagtcctatgcaggagccaaactttaacctcttt  
tctcggttcgatcccgatgtgccttggttctttctgtttaactccgtccaat

>MITE\_T\_59124

attgaggggcttagaggacaaagcgcataagtaaAGTTTTTGCTATCTTGAGAAATCtgatgtttgaagtttgaaattacatg  
gatccttatggcggaaagaaagttcaaaactgactttcgatgcttaaaaaatgaatttaggagcgaattttcacagaatatgcattaagactagttta  
cttggaaatcattaatacctaaattttcaaaaattgcacttatgcgccttgctccaggctCCCCAAT

>MITE\_T\_59306

ctgccgtgctaaggaaaaacgccctatgaactttcaagagttgccgaattttcttgttacaacgttcattttgaagggaagccatggatattttcctg  
aaatttcaggaaacttaggtgaaattgcgaacaaatttatctgaaaaattggaggaaaaatattttaaattttccgaaaaattcgtgattactaaag  
gaaatttggcaacgcctgaaggctcatacggcattttccttagcatggcag

>MITE\_T\_59623

attgaaccgagttatcagaaagaaaccaacccacatttttaaaaaaattgagttgaggatgttttgagttcctctagtttatattttcttctgccaaaa  
attcaaagttaaaaaaaaatattagttgtgaaatgaagcgtaaaagttactttctacactgagtccttatggagggaataaaaactcaaacctcttttctc  
agtttcatcttgatgtgggttggttctttctgatgagctTAGTCCAAT

>MITE\_T\_59668

ACTAGagttgaaccgattattttccaaatcacgtaagcgtcAATCTCTATTTTTGGCGTataggggtgtttttcttgttttctctg  
ggaTGATCagtcagtctgatttcaaaatagccttacaacaaacatacatttttggaaattcgaggATTGccaacaaagcgaataaacggg  
tTTCTTGTTATTCTCGCATTCGCGATTTTGGCGCTTACATGacttggaaaataatcgggtccCACTGCA  
AGT

>MITE\_T\_60069

CACCTTGTCTCTACGGGAcgtttcatgagatttgcceaagttggatattgcaggaatgaaacttctgggcttctTCCCTGTtg  
aacaaaacaacaaaatttcttcttctctctgAGTCTCTTATCGGATCCCACAAGAGCTCTGCTTGGTACTG  
CGATTTGTATTGACCAACTctttatttttccaaactttatGAGTGAGATTTTCCCGGGGATGAATTCTAT  
GAAACGTCCTGTGGAACAAGCTT

>MITE\_T\_60072

cctccgtgctaaggaaaaacgccgcatgagcatttgaatgttgccaaattgtctctcagaaaaatgtttatttctgaagactgtcacgcataattttcctt  
gaaatttcagaaacaTCAGATCAAACCACTCACAAAATGCTTCCAAAAGTTGTATGAAAAAAGT  
TAACAAATATTaccgaaaattcgagatttctggaaggagatttggcaacgtctgaaggctcatacggcggttcttcttagcacggcag

>MITE\_T\_60176

ctgccgtgctcagggaaaaacgccgtatgaaccttcaggcggttgccaaatttctgtgataaacgcgaattacctgtaaactcatgaaaatttctt  
tccaattttcagataattgtgtcgaatttcacttaaaaatttgaagatttaaaggaaaaagcTTCGTatttatctcaaaaataaccattttatag  
agggaaatttggcaactctcgaatgttcatacggcggttcttcttagcacagcag

>MITE\_T\_60267

attggactgagtaagcagaaaggaaccaacccacattttggaaaaaattgagttatgagtggtttgaactcaaccactgctctactatctatcgcc  
aaaaattcaaagttttgatggagcaaattttgcagaaattgaactcaaagtttatctttacattgagtcctatgcaggagccaaactttaagctcttt  
tctcggttcgatcccgatgtggcttggttctttctgtttaactccgtccaat

>MITE\_T\_60440

attggactgagtaagcagaaaggaaccaacccacattttggaaaaaattgagttatgagtggtttgaactcagccactgctctactatctatcgc  
caaaaatttaaagttttgttgagcaaattttgcagaaattgaacttgaaagtttatgtttacattgagtcctatgcaggagccaaactttaacctcttt  
tctcggttcgatcccgatgtggcttggttctttctgtttaactccgtccaat

>MITE\_T\_60467

ctgccgtgctgaggaacacgccgtatgaaccttcaggcggttgccaaatttcttggcaaatcacgaattttcgggaaaattgttaatttttccc  
ccatttttcagataattttgttcccaattttacctgaagttcctgaaaatttcaaggaaaaatattcctagctttcctcataaatatgcgttgattgaagg  
aaatttggcaactctcgaatgggtatcacggcggttttcttagcacggcgg

>MITE\_T\_60914

ctgtcgtgctaaggagaacgccgtatgaacattcgagagttgccaaatttcttgaataaaacatgcagtttgacgacattcatgcataattttctt  
gaaattttcaaatttttagattaaattgcatgcaaaattgtctgaaaatttgaataaatattcgcaattttccagtcattcgggttttatcggaagaa  
acttggcaatgtttgaaggctcatacagcggttcttcttagcatggcag

>MITE\_T\_61791

ttgaaactgatagacaaagctatagacaaagacgacaaaagagatttggagggatcctattgggtggaagcaggtgggtggcaatggacatagga  
gggttgGTAATGGACtataaccaacggcaaccactaaagaccgacagttagtcacatcttctccttagtctacgagaaccaatcatgt  
caaccaataagatcgctccatactccctatgtcttcttctgtctatagctttgtccatcagtttcaa  
>MITE\_T\_61852  
ctgccgtgctgaggaataacgccgtatgaacattcaagagttgccaaatttctcttataaaGTATTTACTTTggaagaaacttatgaatatt  
ttctcttgaaatttctcagacttaaatcaaatgaacaaaaattctctgaaaaattcaggtaaaaatatcaacaaatttggccgaaaattcatgattgtc  
gatggagatttggcaatggccgatggttcatacggcggttctccttagcagggcag  
>MITE\_T\_61923  
ttgaggggcttggaggacaaggcgcataagtacagtttagaaaaagtgagatattaatgattcaagtacaGTACAAGAAGTCTTA  
ATACATATTCAAAAATTTCGCTtctaaattccaattttaccatcaaaaagtcagtttgaactttcttctgccacaaggatccgtgtaatt  
ttcgaaacttcaaacgTATTTcccgaatagcaaaaactgcacttatgcgccttgcctccaatccccTCAA  
>MITE\_T\_62253  
cactggaaaaaacacattggatctagagtcagactcttaaaaacatcgacaagaaaaagttactcttgattcaatcagaatctagcttgaatcaa  
gaaccaagcctcttaatttaagcggatttcgtttcattcaagcaaaaatccgattgaatcgaggtatttttctgtcaatgttttcaagagctcggact  
ctagatccaaagtgtttttttttttttttttttttttccagt  
>MITE\_T\_62397  
tgaggggttggaggacaaggcgcataagtgcagttttgaaaaaattgagatgacaTGATTTC AAGTTTAACTTGTCTTA  
ATGCATATCCTATGAAAAagtcgctccaaattccaattttaaagcatcaaaaagtcagcttcaactttcttccgccacaaggatcc  
atgtaatttcgaaacttcaaacacgtatctctggaagtagcaaaaagctgcacttgtgcgccttgccttcaagccccctca  
>MITE\_T\_62491  
attgaGGTGTGTTGGAAGacagggcgcataagtgcagttttgaaaaaattgaggtattcaagtgaactagctttaatgcatattctatg  
aaaCATTCGctccaaaattccaattttaaagcatcagcaagtcagtttgaactagcttccgccataaggatccatgttatttcgaaactcaaa  
cacgtatttctgaaagtagcagaaactgcacttatgcgtcttgcctccaagccccctcaat  
>MITE\_T\_62516  
cactgaaaaaaaaaacactcagctcggactctagatccaatgatctagagtcagactcttaaaaacatcgacaagaaaaagttactctcggttca  
atcagaatctagcttaaatcaagaaccaagcctcttaatttaagcggatttcgtttgattcaagcaaaaatccgattgaatcaagagtatttttctga  
caatgttttcaagagctcggactctagatccaatgtgtttttccagt  
>MITE\_T\_62525  
acagctagagtcctttatactgagagtcagacaattcggctcatggatgtcacaaacgggaataaagattacagaaattgaacgttttctgtaatt  
ctttgatcgccccattctcaaatgcctttctccgttcctcctctcattccgtttgttccttgcgaaccgtaattccccggtccattccagattataatctt  
tgcaattggtgaaaatgtaattttattccgttcgtgacactgtggaggcctaaaatacgggaaccaatcagaaatggattcaaattgtcttgactct  
cagtataaagggactctaataacagctatcttgtttgttttttagtgtacctgtatagcgagagtatagacagatgtgaaactccgaaaatccatca  
ggccttcaccgatgcctccgcgaataaagttaagGCCAGAAAtgctgccaacatgaatttcaattttccagagcgctttactagtaca  
attgttacgaatcatcgtttataaagcacgtatttgacttactgtttacataaatttactcattttgcggaagaacgctcatttatgtataattcttagcca  
tcttggttagaattggaatgtgcagactggcagtgaaatttgcgtttagaagttggttagaaggggtggctgcacttttgggccctaagccctcct  
gaagcgatctgtccatactctactatataggtactctagtt  
>MITE\_T\_62530  
AGATGGGCTTgcaggaaaaggcgcataagtgcagttttgaaaaagttgagataactaatgattttaagtaaaactagctttaatgaaTAT  
GCTGTGAATatttcgctcccaaattcaattattaAGCGTCAAAAAGacagtttgaactttctttcaccataaagatccatgtagtt  
tcgaaacttcaaacacgtatttctcgaaacagcaaaaactgcacttatgcaccttgcctccaagccccct  
>MITE\_T\_62655  
tgatgggcttggagacaaggcgcatcagtgacgttttgcatttcgagaaaactCGTTTAACGTCCGAAATAACATGGA  
TCCTTattgcggaagaaagtcaaaactgacttttgatgcttaaaaattggaatttgaagcgaatttttcgagggtatgcattcagactagttt  
actgaaatcatcaacatctcaatttttcaaaaattgcacttacgcgccttgcctccaagtcctca  
>MITE\_T\_62716  
gattaagcaaacactggaaaaaacatattggatctagagtcagactcttgaaaacattgacaagaaaaaatactcttgattcaatcggatttttgc  
ttgaatcaaaacgaaatccgcttaaatgaaggcgttggttcttgatttaagctagattttgattgaattaagagtacttttctgtcgatgttttaagcg  
tctggactctagatacaatgttttttttctagtgaaagattaatc  
>MITE\_T\_62943  
ACCCTTTGACGGCCGCGTTAGGAATACGGCCGCCGATAGTGGCGCTCTCTGTCAAGGAT  
AAGATAAAGATGTAGTTCACATATTTGCCGACAGAGTGCGCATATGCTGTATacttaatttcattga

aaaacaagGGAGCTAGAGCGGGAAATACGAACGCGAGGCGCAGCACGAGAATACTCGGGC  
GTGGTCTGTGACGGTGGCTTGCCGCAACCCGAGTATTCTCGGGCGTGGTACTCAAaggg  
>MITE\_T\_63059  
cactggaaaaaagtgtttggatctagagtcagactcttaataatattgacaaaaaaaaaaaaaaaaaaaaaacttttgattcaatccg  
attttccttgaatcgaagagccgagcttCTTGATTTAggaggattttcttttgattcaagcaaaaagtccgattgaatcaagaggatttttctt  
gtcaatgttttaagagtcttgactcgaGATCCGAGGtacttttctccagtg  
>MITE\_T\_63234  
tgtgaggacttatatgtaacaatggcggatgtgaaaaattaccttttagaacaagtcaaaaaactgtttggcatcgagaaaatttgagaaaatac  
ttgagatgtgatcttcgagatctgtacaatTGTACATTATGTCAGAGCCGAACATATTAGATTTTTGTGTgcca  
aaacagtttttagtCGTGTttggaaagttaattttcacatccgtcattgttacatataaggcctcata  
>MITE\_T\_63288  
attgaaccgattattctTCAAATCACGTAAGTggcaatctctattttggtggcaGAGCAGAggttgctttttttgtttctctgg  
ataatcaatcatgtccgatttcaaaatagcTTTCCAAAGaacacacatttttggaattcgaagattgcaccTTATCGAATAAaa  
cggttttctgttttctcgattcgaatttcggcgcttacgtgatttgaaaacaATCGGTTTAAT  
>MITE\_T\_63314  
AGCCCATTCACCTCATTTGATGAGTATACTTGTGTCAGCACGCGCGGGGGACATATTTCAAT  
TGGCGAGTTAATTCACAGCATCTATCGGCGTTGCTAGGCGATTTTTTGGGCAGTGTTTTG  
TCACTTTTCCCATAGATGGCGTCTCAAGCGCCGGAACGTCGCAAATGGCGTGAATTCAC  
TCGTCAGCTAAGATAATGTTCTAGGCGCCCGCTGACAAGTAACTTGTCATGTGAGGCA  
AATGGGT  
>MITE\_T\_63809  
cacggagaaaaatctatggcttataaaccaattagtggtcatatgaaACACCACTAGTAGTAGTGAAGGCAACATAA  
TAGTAAATATATCTTAGTTATGGTATATATGGCATAACATACCATTATGGTACGAAGTACCA  
CAGTAGgggtcacagaccgataatTATTAGTTCATAATACATCTATTGCTGGTGTTCATaagaaccactaatt  
ggtttatgagccatagcttttctcagtg  
>MITE\_T\_64188  
catacacggaaaaaattaaatgttgatttagcatttatattgttaaaaacatgttcgacaagttcaaatgctgattttacatttaagaaatgctaact  
aactacgcctgctgtaaaacgaacaaatgTCAATGTCGTGTAAaagcatttttgattgtaaaatcagcattggAAACTTGAC  
GGGCCTTTTGTTAACAATTTAAATGCCAAATCaacacttgattttttccctgtaCTG  
>MITE\_T\_64196  
cactgaagaaaaaactccggccgtgggagccgcaattacgggctatacatatagacataaccgtccgttccgggctcagaggccgaaaattccg  
gctgctggagccgtaacttcggcctctgaaccggagcaatcgaagctacgcctccagcagccggaatttcagcctttgagcccggaaacgga  
cgttatgtctatagcccgaattgcggtccacggccggagtttttccagtg  
>MITE\_T\_64247  
tggacgtatttctatcaaacagacctaagcgccataggggtgaggacctaagcgccataggggtgaggaaggtagaggggggcttagatggagg  
cggaatcgggctccggcttattccgtctatactcgcaatgctttccatggcacttaggtccgtttgacagaacgcgctatccgggattctaaatt  
cctcaaaaggaactcaaattggcgcttagttccagttgatagaaatacgtcca  
>MITE\_T\_64251  
tgccacacagtggatcgagtcaatagcagaggtcggaacaaatttgaaactttaaaagcttaaaactccgttcatacacaatttgagattctaaa  
agtggtttcattgctttccgcgtaaaaattttctccagaggcacccttaaaagtttaaaatgtgccgaaataaacatcaaaattttccgtctcagtcaaa  
aatttcatgtccgacctttctgattgactcgatccactgtgtgcca  
>MITE\_T\_64257  
ACCGTTTGTGTCATATAGCGTtacatgaaagcaacaaatgtTTTTTGGGTTTGATCCTCTGTGGCATT  
AAATTGCGCTAAAGCAACACATGGTTTTTGGAAAGGATTAGAGGTCTGGTCTCCAAAattc  
ccccccccaaaaaaatataaattgaaacTTAATCTGTTCTTATAATCCGAAAAACACTGTAGAATGTAGA  
TTTTATCTCTGAAATCGGTGACTGACTCGTGCAACAAAGGGA  
>MITE\_T\_64315  
aattaattatacagggtgtctcaNataaaaaagtaggggtgccatttgaaaagttcgacttacgggtggggcacccccgccccgcgcccctcc  
cgcggtttgggaaaaatgtcaaatgcgcaaaaggtgtccccctgatataaacgaacacgtcttttaccgttttgcgaattccgacgcgttcggca  
gatattcaaggtggctccttttctgtgagacaccctgtataaataatat  
>MITE\_T\_64367



cactgaaaaaaaaactccggccgtgggagccgcaattacgggctatatagataccgtccgttccgggctcaaaggccgaaaattccggctg  
ctggagccgtagcttcggcctccgaacccggagcaatcgaaaatacggctccagcagccggaatttcggccttgagcccggaacgaacggt  
atctctatatagcccgtaatttcggctcccacggccggagttttttttcagtg

>MITE\_T\_64403

cacggaaaaattaaattgctgatttaagtaacaattcaattgctaaaaaagagactgcaatattcaacgtagatttcacaacacaaaaatgcaact  
ttaaccaccctcgtggtaaatttagcttacaatagagGTTAAAGtatttgtaaatgtgtgtgaaatctacgttggaatattgcagtcacttt  
tttttagcaatttaattgttaaatcagcaattttttttccgtg

>MITE\_T\_64519

cacggaaaaattaaattgtttatttcacaattcaattgctaaaaaagtgactgcaatattcaatgtagatttcacaacaaaaaatgctactttaa  
ccactattgtaggctaatttaaccacgggggtggttaaggtggcatttttttctttttttgtaaaatttacattgaaatattgcagtcacttttttagca  
attgaattgttaaatcagcaatttaattttaccgtg

>MITE\_T\_64527

GAATAATAACTACCAGAAAGGTAAGTGGCGGATCCTCTTGTAAGATTGCGTTAGCGTATA  
GTCACTTTTGTGAAGCGGACTTCGCTTTTTTTTCCCCCGCGAAATTTGAAACGGCAGAG  
ACGTAGGGTAAGAGCCGCCGACTTGACTCTTTTTCTCGTGAGGTAGGCTGAGCGGGG  
GTCGCAGGGATTTCAGAATCGGGCAAAGATGGCCGACTGCTGCCTTTCTGGTAGCTATT  
ATTC

>MITE\_T\_64563

ccgtacactggaaaaaaaaacacattggatctagagtcagactcttaaaacatcgacaagaaaaatactcttgattcaatcggattttgtcta  
gatcaagaaccaagcctctaatttgagcggatttccttttgatttaagcttaaatctgattgaatcaagagtccttttctgtcaatgtttccaagagt  
ctggactctagatccaatgtgtttttttccagtgtagg

>MITE\_T\_64767

ctcagtagtggggccgataagcataacaatcgNaaaaattacgctaacattagccgttcagtagttattcaaaattcaaaattggggggccccct  
gccccccagggggctcagattttggggctatgtctgaatcgaatgtctatagggtagagatgaatccctgaaatttcatgtcttctccagaag  
tgcacgattcttatgatattttccattatcgccccgcACTAcagg

>MITE\_T\_64838

cactggaaaaaaaaacaaaaaaaaaacacattggatctagagtcagactcttaaaacatcgacaagaaaaagtactcttgattcaatcagaa  
tctagcttaaatcaaaaaccaagcctctaatttaagcggattccgttctgattcaagcaaaaatccgattgaatcaagagtatttttctgtcaatgttt  
tcaagagtctggactctagatccaatgagtttcttttccagtg

>MITE\_T\_65203

attgaggagctttccggaaaaagggcacatagcaaaaaatcgcggtgagaaaaatgcattttaagttccatcattactttTTGGCCACT  
GGTGGTATAACTtccatcgagcttgactacCGATCTAGAACGTAAAGTCACAATCAGTGGCCATAG  
AGTAATCATAGAACTTCAAATTCCTTTCTattcaaacgcgatttttgccatgtgcccttttccggaaagctcttcAA  
T

>MITE\_T\_65297

tggacgtatttctatcgaacggacgtaagcgccatagggtaggaaggtagaggggggcttgattggcgcggaatcggcgctccggcttat  
tttGTCTCTGGGCTTATTCCGttctatactcgcaatgcttttccatggcgctgaggtccgtttgacagaacgcgctatccgggatttct  
aaattcctcaaaaggaactcaaattggcgcttagttccgtttgatagaaatcgtcca

>MITE\_T\_65459

cactggaaaaaagaagaaaaaacacacattggatctacagtcagactcttaaaacatcgacaagaaaaagtactcttgattcaatcagaat  
ctagcttaaatgaaccaagcctctaatttaagcggattttgttttgattcaagcaaaaatcctattgaatcaagagtatttttctgtcaatgtttca  
agagtctggactctagatccaatgtgttttttccagtg

>MITE\_T\_65801

cactggaaaaaaaacacattggatctagagtcagactcttgaaaacattgacaagaaaaatactcttcattcaatcggatttttgcttgaatcaa  
aacgaaatccgcttaaataaaaggcttggttcttgatttaagctagattccgattgaatcaagagtacttttctgtcgatgttttaagagtctggact  
ctagatccaatgtgttttttattttttttcagtg

>MITE\_T\_65888

caccggaaaaaaaaaaaaaaaaaacacattggatctagagtcagactcttgaaaacattgacaagaaaaatactcttgattcaatcggattttg  
cttgaatcaaaacgaaatccgcttaaatgaaggcttggttcttgatttaagctagattctgattgaataggagtacttttctgtcgatgttttaag  
agtctggactctaaatccaatgtgttttttttccagtg

>MITE\_T\_65948

gtccaggcgcttggaagtctacctggaattttgggtacacagcgatttttggcttgctTTATGtaatttgggtcgtgaatccgaatctgaag  
tttctaccgcgtatctggtagcattttccgccattttgaaaaaatggcctaaaatggcctaaaaggccttttttggcggttttttgACATaccg  
gctacgcatgagaaaaagtcccagatttagctaattgtttgaatatctgacataatttgaaagaaaatggtatatacatatgctaggtttgcttaaaaaat

tgagaaacctcgatctcggaacttcggaacgcttcggaacttggtgaccgcggcgagccggatcgcgcggtgacgggtgcgcctcGAA  
AACGTGAAAAAGCGCaatgttcacgatgctgtatcttctcaattttaagcaaaccttgcatatgtataaccattttcttcaaattatg  
tcagctattcaaaacattagctaaatctgggactttttctatgcgtagccgctatgtCAAAAAAACCGCCagaaaaggccttttaggc  
cattttaggccatttttcaaattggcggaatgctcaccagatacgcggtgggaaacttcagattccgattcagcgacccaaaaacataattt  
agccaaaaaatcgctgtgtacccaaattccagggtgcctcatttttagctaccaggcgctggac

>MITE\_T\_69228

cactggaaaaaaaattcgcttgatctagagcttagactcttgataTCAAtgacaatgacaagaaaaatactcttgattcaatcggatttttctt  
aaatcgagaaccaagcctctaatttaagcggatttccttcgatttaagcaaaaatctgattaagtaagagatattttcctgtcatcgattcaagag  
tctggactctagatccaagctactctttttccagt

>MITE\_T\_69360

GTTCCAAAAGCGGCAATCTCCATTGACTTTTCTACAAATTGTGCGatcattataatttttaaagtgaagaa  
aCAAGGAAATCCACATGTTTatgttttctcgtgaattttctgttattaagcgagaaaatttgaaaaatttaatacagcTGGAC  
GTTTTGATTGGTCCTCACAGAAAATTAATATGATCGCACAAAGTTTTAGACAAGACATTGG  
AGATTGCCGGGTTTGGAAC

>MITE\_T\_69560

cactggaaaaaacacattggatctagagtcagactcttaaaaacatcgacaagaaaaatactcttgatccaatcagacttaagcttaaatcaa  
gaaccaagcctctaatttgagcggatttcctttgatttagctgattgatgaatctgattgaatcaagagtcctttttctgtcaatgtttcaagagtc  
tggactctagatccaatgtacttttttccagt

>MITE\_T\_69571

aggaagaacgccctatgagccttcaggcgttgccaaactcctgtgacaaatcactaattttcaggaaagtttgtaatttttctccgatttctcag  
ataattgtgtTCAGAATATGCTCtgaatttccttaattttcaaggaaaataattcataacttcctcgaaaataaacatttctcaGAGG  
TTGTTTGGCaataactctcgaatgttcatacggcgcttctcct

>MITE\_T\_69710

aggaaaaacgccgatgaaccttcaggcgtttacaaatttccttgataaaaaaatttcttggtaaaccaatcaatatttttcttcaattttcgtgta  
atTTTGTTTACTTCCTATTTCTTCTTTACTTCCTGAGAAatcaaggagaaaaattcatgttttccacaaaaataaa  
cattttatgggagaaaatttggaactctcgaatgttcatacggcgcttctcct

>MITE\_T\_69722

TgtgaaaacgtccgatgtccaagacggtgttcagaatttgagtggacaattTCGTAGTAACTCAACGACACAAGATGG  
TCTAAGACGttaggaatgtagaacaattttataaataatccctaagtctaattaacgtttacaaaagagatcgatcCTATTCATCG  
GCGTTGTGGGACAAAAGAATCCCAccacaattatgaaaccctgtattggacaatggacgttttcgca

>MITE\_T\_69828

cacgaaaagaaatgaaatgttgatttagcatttatactgttagaAAGATGTTGGACAAGTTGGACAAATGTTGATTT  
TACGTTTTGACAAATGCTAaggtaacacgcccactgcaaacgtacaaattaaatgttatgtagcattttgtattgtaaataca  
gcatttgaaactgtcggacatcttttaacagtataaatgctaataacatttaatttttccgtg

>MITE\_T\_69845

CACTGgtaaaagaacacattggattaaTAGTCTatagattcttgaaaacattgacaagaaaaaggactcttgattcaatcagatttaatct  
taaatacaaaaggaaatccgctcaaattaagaggcttggttcttgatttaagcttaaatctgattgaatcaagagatatttttctgtcgatgttttaagag  
tctggactctagatccaatgtgggttttttttccagt

>MITE\_T\_69998

agtaagaacaccgatgagccatcaagcgttgccaaatttccttcgataaatcacgaatttcgggaaaatttgtaattttctctcagattttcag  
aggatctcggtcgtaatttgatctaaaaagctgaaaattcaagaaaaaatattgacgacttcctcagaaataaacattttcaacaagAAAT  
GTTTTAACACTCGAATACttatatacggcgcttttact

>MITE\_T\_70053

cactggaaaaaaaacacggttgatcttgagttcagactcttgaaaacattgacaagaaaaggactcttgattcaatcagatttaagcttaaatc  
aaaaggaaatccgctcaaattaagaagcttggttcttgatgatttacgcttaaatctgattgaatcaagagtccttttctgtcaatgtttcaagagtc  
ggactctagatccaatgtgttttttccagt

>MITE\_T\_70082

cactggaaaaaaaacacattggatctagagtcagactcttaaaaacgttgacaagagaaaaatactcttgattcaatcggacttttgcttgaatc  
aaaaggaaatccgcttaaatcaagaggcacggctcttcgattcaaggaaaaatcggattgaatcaagggtatttttctgacaatgtttatgaaagt  
ctcgaactctagattcaagcacttttttccccagt

>MITE\_T\_70233

tgaGGA CTTgaatgtaacaatggcggatgtgaaaaatgaccttttGAAACAGGTTCAAAAACCTGTTTTGgcactg  
agaaaattttagaaaaacttgtgatgtgatcttcgagatcttGCATTATGCCAGAGGCAaacatattatatttgtgtgacgaaaa  
cagtttttaagcgtgttcgaaaaggtaatttttacatccgccattgttacatataaggcctca  
>MITE\_T\_70422  
CACTGgcaaaaaaagtcgcttgatccagattccagactcttaaaaacattgacaagaaaaaatactcttgattcaatcggatttgcgtgaat  
caaaaggaaatccgcttaaatcaacaggcttggtcttcgattccaggaaaaatccaatcgaatcaagagtttttttctgtcaatgttattaag  
cgtctagactctagatccaagcgactttttccagt  
>MITE\_T\_70454  
cactgggaaaaagaaacacattggatctagagtccagactcttaaaaacatcgacaagaaaaaatactcttgattcaatcagatttaagcttaaatc  
aagaaccaaacctcttaatttgagcggatttcctttgatttaagcttagatctgattgaattatgagtccttttctgtcaatgtttcaagagtctggac  
cctagatccaatgtgtattttttcccatg  
>MITE\_T\_70720  
cactcaaaaaaaggtataacTCTGAGGCctataaaaaatggctcggagatccataatttctaaccaaagtgacttacgcttacagtatggc  
tttctgagccatacttaaTTGGTCGGAACCTATTAgataggctccacgaactatattcatggctccacgaactatattcatggctcc  
atgatccataactcggccggttaagtcactcttccatactgttttggGTG  
>MITE\_T\_70730  
tgaggacttatctgtaacaatagcggatgtgaaaaattacctttcgaacatattcaaaaaactgtttggcatcgagaaaattttagaaaaactt  
gagatgtgatcttcgagatctgtactttataccagagccaaacatattacattttgtgagcaccaaacagtttttaagcgtgtttctaaaaggtaattt  
tcacatccgccattgttacatataaagCCTCA  
>MITE\_T\_71046  
cactggaaaaaaaaccacattggatctagagtccagactcttaaaaaacatcgacaagaaaaaatactcttgattcaatcggatttaagcttaaat  
caagaaccagcctcttaatttgagcggatttcctttgattaaagcttaaatctgattgaatcaagagtatttttctgtcaatgtttcaagagtctgg  
actctagatccaatgtgtttttttccagt  
>MITE\_T\_71149  
Cacggcaaaaaattaaatgttgatttagcatttatactgttaaaaaatgtccgacaagttcccaatgctgatttacaatacaaaaatgctaacataa  
cattttaattgtacgttttcgagtggtgtagttacggttagcatttataaaatgtaaaatcagcatttgaaactgtcggacatctgtttaacagtataa  
atgctaataccaaatttaatttcttccgtg  
>MITE\_T\_71152  
cactggaaaaagaaaccacattggatctaatctagagtctagactcttgaaaacatcgacaagaaaaaatactcttgattcaatcagatttaattcttaa  
atcaaaaggaaatccgctcaaattaagaggcttggttcttgatttaagcttaaatctgatcgaatcaagagtacttttctgtcgatgttttaagagtc  
tggtactctagatccaatgtgttttttccagt  
>MITE\_T\_71182  
attgggcgtatttctgttaaaccggaactaagcgctaattgagttcctttgaggattttggaATCCTGGAatggcgcgttctgtcaaaccggaac  
taagcgccatggaaaagcattgcaagtaTAGGACGGAAATACGAGTAGCATCGCTTCCGCAACAacctgccaat  
ccaagccccctctccctctcCCCTCgacggcgcttagttccggttgatagaaatacgtccaat  
>MITE\_T\_71199  
cactggaaaaaaaacacattggatctagagtccagactctcagaaacatcgacaagaaaaagtagtactcttgattcaatcagaatctagcttaaat  
caagaaccaagcctcttaatttaagcggatttcgtttgattcaagcaaaaatccgattgagttaaagagtatttttctgtcaatgtttcaagagtctg  
gacactagatccaatgtgttttttctagt  
>MITE\_T\_71203  
GGGACaaggccgattcacctacttgccgcccatgggcccgcgcattttgccgcccccttctcattcgtttgaaactcgataaaaaccatc  
aagtgagcgTGCCAGCGGgtgaggggtgcataagatgcatttactcgtgttaaaccgatttttgggagagccctgtcaaacactgtagct  
aaagttcccggaaatttgcgcaaaatttcagtttcgtaaacctatctctgtgtggacaaggccttcaatgtttggcgaaaagcgtgaagtattcacgc  
agtctttagggcgctatccctccacgctgaccgcaatgaccgcactgtgttgatgcaatgcgagaagtattcgtgcagtctcgtagacgctaata  
tgtgttacatgccgattgccgtgccgagagcttctctttcatctcaagtcctcgttatcatttctctaaagtcgcgcggttccaggccaaattgcct  
gtttggtttctcttaattcgactaattgatcctgctcttgatcactaagagacggcaaaattagaaattactgtactctcaggaaatgggagatttt  
ttcgcttttctcgtttgtaattttgttttaaaaaatccgattttttataaccttcaactaaaaaaattgcaatttttgcgcccgttaatttgccgcatg  
ggtcgcggcccatgtagccacccccttaatccggccctggcca  
>MITE\_T\_71264  
cacagaaaaaattaaattgctgatttaacaattcaattgctaacaagtgactgcaacgtttcgacgtagattttacgacaaaaaatgctactttga  
cCACTATTGTAAGCCAATTTAACCATGGGGGTGgttcaagtagcattttgtgttgtaaaatctacattgaaatattgca  
gtcacttttttagcgattgaattgtaaaccagcaatttaatttttctgtg

>MITE\_T\_71273

cactggaaaaaagaaacacattggatctagagtccagactcttgaaaacattaaaaaagaaaaatactcttgattcaatcggatttttgcttgaatca  
aaacgaaatccgcttaaattaagaggcttgattcttgatttaagctagactctgatttaatacaagagtacttttctgtcgatgttttaagagtctggac  
tctagatacaatgtgtttctttttccagtg

>MITE\_T\_71363

cactggaaaaaaacacattggatctagagtccagactcttgaaaacattgacaagaaaaatactcttgattcaatcggatttttgcttgaatcgaa  
acgaaatccgcttaaattaagaggcttggttcttgatttaagctagattctgattgaatcaagagtacttttatttctgtcgatgttttaagagtctgg  
actctagatccaatgtgtttctttccagcg

>MITE\_T\_71444

cactggaaaaaaacacattggatctagagtccagactcttaaaaacatcgacaagaaaaatactcttgattcgatcagtttaagcttaaatca  
agaaccagcctctaatttgagcggattttcttttgatttaagcttaaatctgattgaatcaagtgagtccttttctgtcaatgttttaagagtctgg  
actctagatccaatgcgttctttttccagtg

>MITE\_T\_71489

cactggaaaaaaaaaaaaacacattggatctagagtccagactcttgaaaacattgacaagaaaaatagtcttgattcaatcagatttttgcttaa  
atcaaaaagaaatccgctcaaattaagaggcttagttcttgattgaagcaaaaatccgattgaatcaagagtatttttcttctcgatgttttatgagtc  
tggaactctagatccaatgtgtttttccagtg

>MITE\_T\_71656

cactggaaaaaagaaacacattggatctagagtccagactcttaaaaacatcgacaagaaaaagtactcatgattcaatcagaatctagcttaaatc  
aagaaccaagcctctaattcaagcggatttcgttttgattcaagcaaaaatccgactgaatcaagagtattcttactgtcaatgttttaagagtctg  
gactctagatccaatgtgttttatttttccagtg

>MITE\_T\_71659

cactggaaaaaaacacattggatctagagtccagactcttaaaaacatcgataagaaaaatactcttgattcaattaatcagatttaagcttaaat  
caagaaccaagcctctaatttgagcggatttcttttgatttaaaacttaaatctgattgaatcaagagtccttttctgtcaatgttttaagagtctgga  
ctctagatccaatgtgtttttttccggtg

>MITE\_T\_71667

cactagaaaaaaacacattgaatctagagtccagactcttgaaaacattgacaagaaaaacgactcttgattcaatcagatttaagcttaaatc  
aaaaggaaatccgctcaaattaagaggctgggttcttgatttaagctcaaatctgattgaatcaagagtatttttctgtcgatgttttaagagtctgg  
actctagatccaatgtgtttttttccagtg

>MITE\_T\_71717

cgactggaaaaaagaaacacattggatctagagttcagactcttaaaaacattgaaaagaaaaaggactcttgattcaatcagatttaagcttaaat  
caaaaggaaatccgctcaaattaagaggcttggttcttgatttaagcttaaatctgattgaatcaggagtatttttctgtcgatgttttaagagcctg  
gactctagatccaatgtgtttttccagtgcg

>MITE\_T\_71830

agtaaaacgcgctatgatccttcgtcagttgccaaatttccttcgatcaaatacgaatttcaggaaaactGCGAACATTtccggttaatt  
tttcagagaattttctatCTAATTAGATGTaaatcatccgaaaatttcaagaaaaatattcaagctcTCTTccgaaatgaacattttat  
cgaagaaaatttggcaactctcgaatgctcatcggcgttttct

>MITE\_T\_71882

cactggaaaaaaacacattggatctagagtccagactcttaaaaacatcgacaagaaaaagtactcttggttcaatcagaatctagcttaaatcaa  
gaaccaggcctctaatttcagcggatttcgttttgattcaagcaaaaatccgattgaatcaagagtatttttctgtcaatgttttaagagtctggac  
tctagatccaatgtgttttattttttccagtg

>MITE\_T\_71940

cacggaaaaaaaagaattgctgattcagcaaatcaattgctaaaaacagtgagtgcaatgtttcaacgcagattttacaacaaaaaaatgctacttt  
aaccacccccatggtaaatgatttacaatgtggtaaaagtagcattttttgtgtaaaatctgcgttgaaacattgcactcactgttttagcaattg  
aattgttgatcagcaatttttttcccggtg

>MITE\_T\_72155

aggaaaaacgcgctatgaacattcgagagttgccgaatttcccaaataaaaacatgtcttttcaggaaaagttgtgctgttttcttgaaatttcag  
atattttcgtttaaatgtgaacaaatttgactgaaaatttgaggaaaaatactcgtaattttctcagtaaatccgattttctgaaggaaatatggcaa  
cgtctgaaggctcatcggcggttcttct

>MITE\_T\_72159

cactggaaaaaagaaacacattggatctagagtccagactcttaaaaacatcgacaagaaaaagtactcttgattcaatcagaatctagcctcaaga  
aatcaagaaccaagcctctaattctaagcggatttcgttttgattcaagcaaaaatccgattgaatcaagagtatttttctgtcaatgttttaagagt  
ctggactctagatccaaagtgtttttccagtg

>MITE\_T\_72201

aggacaacgccgtgagagccatcaagcgttgccaaattcctccgacaaatcacgaattccgggaaaatcagagaatattttctccaattttc  
agaggatctcgttcttaattgatctaaaagtgtgaaaatgcgaacgaaaaatattcataactttctcaaaaatgaatattttctgtgaggaaattgg  
caacattcgaatgctcatccggcgttttact

>MITE\_T\_72204

cactagaaaaaaaaatacattggatctagagtcagactcttgaaaacattgacaagaaaaaatactcttgattcaatcagatttaagcttaaatca  
aaaggaaattcgctcaaattaagaggcttggttcttgatttaagctagattccgattgaatcaagagtatttttctgtcgatgttttaagagctggga  
cactagatccaatgtgtttttttccagt

>MITE\_T\_72441

catacaggggtgtcccaaaagtcggtcccaccctgctaacttttgaaacgaattgagctagggtaatgaaactttgggaatgttcctatctcaaagga  
gaccatctttgaggggggtcaaaattttgggcccccaacttttaattcaaatggcaacccttttttaatttaagggtgattaaattgaccgtttaaa  
ttcgttttttaaaactttcccgaaatttggggacttgccaacgtaatgttgaaactaatttgaccttactgagataatgtggaggcaaacttagggga  
aattgcctttttcgcgggaaaattgaatgaccttgatttgacgtatttgggggtccgagcccccttaaaattacagcgatgtgatttctgcaatttt  
tactaaaagcggacacaatttggtaaatttcccgtttattttttcttacgataattgaaccggagttagatttttgaatagggtcaaatttgacc  
tttgacctatcataactcgggtcaaaaattaagatattgatctcggttgcgccccaaattctagtttttatgctcttcgaatgatgtatcacaagatag  
gggttgccatttgaaattaaaaagttgggggcccccgccccctgaagggggcccaaaatttgacccctcaaaagatgggtctccttga  
gataggaacattcccaaagttcattaccctagctcaattcgttcaaaagttagcaggggtgggacggacttttggtacaccctgtatg

>MITE\_T\_72462

cacggaaaaaaagaattgctgattcaacaattcaattgttaaaaacggtagtgcaatgtttcaacgcagattttacaacaaaaaatgctacttta  
accacccccgtggttaaatagtttacaatgtggttaaaagtagcattttttgtgtaaaatctgcgttgaacattgcactcactgttttagcattAA  
Agcgtgaatcagcaattctctttttccgtg

>MITE\_T\_72477

aggagaatgccgtatgagcctcagacgttgccaaattacattTGATAAAACAGAGTTCACAGtagaaattgtgaatatttt  
tcccaaaatttcagacaatttcgtgcgcaatttaatacatctgaaaattcaagaaaaatgtgcatgaacatcgtaaaaaatcatgtttatc  
aagggaaatttggcaactctcgaatgttcatacggcggttctct

>MITE\_T\_72484

cactggaaaaaaaccacattggatctagagtcagactctttaaacaatcgacaagaaaaagtactcttgattcaatcagaatctagcttaaatcaa  
gaaccaagcctcttaatttaagcggatttcgttttgattcaagcaaaaatccgattgaattaagagtatttttctgtcaatgtttcaagagctggact  
ctagatccaatgtgttctgtTTTTCCAGCG

>MITE\_T\_72527

cactggggaaaaaagtcgcttgatctggagtcgagactctgtgttccttggaagaaaaaatactattgattcaatcggattttgcttgaatcaa  
aaggaaatccgcttaaatcaagaagcttggtcttcgattcaaggaaaaatctgattgaatcaagagtattcttctgtcaatgttattaagagtctg  
gactctagatccaagcgacttgtTTTTCCGGTG

>MITE\_T\_72571

cacggggaaaaaaacacattggatctagagtcagactcttgaaaacattgacaagaaaaagaactcttgattcaagcagatttataagcttaaa  
tcaaaaggaaatccgctcaaattaagaggcttggttcttgatttaagcttaaatgttgattgaatcaagagtatttttctgtcgatgttttaagagtctg  
gactctggatccaatgtgtttttccagt

>MITE\_T\_72618

cactaaaaataaaaacgcattggatctagagtcagactcttgaaaacattgacaagaaaaaatactcttgattcagtcagacttaagcttaaatca  
aaaggaaattcgctcaaattaagaggcttggttcttgatttaagcttaaatctgattgaatcaagagtatttttctgtcgatgttttaagagtctggac  
tctagatccaatagttttttccagt

>MITE\_T\_72623

cactggaaaaaaagtcgcttgatctagagtcagactctcgaaaatattgacaagaaagaatactcttgattcaatcggattttgcttgaatcaaa  
aagaaatccgccttaattaagaggcttggttcttgatttaagcaaaaatccgattgaatcaagagtattcttctgtcaatattttcaagagtctggac  
tctagatccaagcgactttttttccagt

>MITE\_T\_72788

gcaaaaagggaaccagcgcgatttcagtgtttcaaaatcgcgcaacttctcttcttgtaaaaaatactcaatacaTGCACAGTGTTAA  
AAAtctacacaattattttcctaacaattaacaatttttgggtggtaaGCAAAAACGATTGTGCTATTCTAGGAAAtatttga  
taattatgaagaagcaacatttttacaacactgtaatcgcgctgggtccttttgc

>MITE\_T\_72947

cactggaaaaaggaatcacacattggatctagagtccagactcttgaacattgacaagaaaaaggactcttgattcaatcagatttaaactaaa  
tcaaaaggaaatcaactcaaattaagaggcttggtcttgatttaagcttaaatctgattgaatcaagagtatttttctgtcgatgttttaagagtctg  
gactctagatccaatgtgtttttccagtg  
>MITE\_T\_73116  
cactggaaaaaaaaaacattggattccgagtcagactcttaaaacatcgacaagaaaaattactcttgattcaatcagaatctagcttaaatca  
agtaccaagcctcttaatttaagtggtttcgtttgattcaagcaaaaatccgattgaatcaagagtatttttctgtcaatgtttcaagagtctggac  
tctagatccaatgtgtttttccagtg  
>MITE\_T\_73384  
cactggaaaaaacacattggatctagagtccaaacttttaaaagcatcgacaagaaaaagtactcttgattcaatcagaatctagcgtaaatca  
agaaccaagcctcttaatttaagcggatttcgtttgattcaagcaaaaatccgattgaatcaagagtatttttctgtcaatgtttcaagagtctgga  
ctctagatccaatgtgtttctttttccagtg  
>MITE\_T\_73507  
attggacttatttctgcaaacggaactaagcgccaatttgagttccttttgaggaaattagaataccggatagcgcggtctgtcaaacggaactaag  
cgccatggaaaagcattgagtgataggaacgaatgagcccacacccgggttcgcccgaatccaagccccccccctctaccttctaccc  
cgatggcgcttagttccgtttgacagaaatacgtccaat  
>MITE\_T\_73605  
CACTGGAagcaaaaacacattggatctagagtccagactcttaatacatcgacaagaaaaaataactcttgattcaatcggattttgcttaa  
tcaagaaccaagcctcttaattgagcggatttcctttgattcagctaaaatctgattgaatcaagagtacttttctgtcgatgttttaagagtctgg  
actctagatccaatgtgttttctttccagtg  
>MITE\_T\_73612  
cactggaaaaaaaacacattggatctagagtccagactcttaaaacatcgacaagaaaaaataactcttgattcgatcagatttaagcttaaatc  
aagaaccaagcctcttaattgagcggatttcctttgacttaagcttaaatctgattgaatcaagagtatttttctgtcaatgtttcaagagtctggg  
ctatagggtccaatatgtttttttccagtg  
>MITE\_T\_73615  
tcactgaaaaaagattggtagaatttatcttccttcacgctgtatttcacacagcgtaattcaAAGTCAAATCTGcgagaagaaaggt  
aaacgttactatatactggtacagttAACCATTCTCTGGTAGAATCGACTTAAAGatgggtagaattaccattccttca  
cgccgtatttcacacagcgtgaaggaatggtaaattctacctatctttttctcagtg  
>MITE\_T\_73648  
cactgggaaaaagaacacattggatctagagtccagactcttgaacattgacaagaaaaaggactcttgattcaatcagatttaagcttaaatc  
aaaagaaaatccgctcaaattaagaggcttagttcttgatttaagcttaaatctgattgaatcaagaatatttttctgtcgatgttttaagagtctgga  
ctctagatccaatgtgtttttttccagtg  
>MITE\_T\_73695  
cactggaaaaaaaacacattggatctagagtccagactcttaaaacatcgacaagaaaaaataactcttgattcaatcagatttaagcttaaac  
aagaaccaagcctcttaattgagcggatttcctttgattgacgcttaaatctgattgaatcaagagtccttttctgtcaatgtttcaagagtctgga  
ctctagatccaatgtgctttttccagtg  
>MITE\_T\_73822  
cactggaaaaaaaacacattggatctagagcccagactcttgaacattgacaagaaaaaataactcttgattcaatcggattttgcttgaatc  
aaaacgaaatccgcttaattaagaggcttggtcttgatttaagcttagattctgattgaatcaagagtacttttctgtgtgatgttttaagagtctgga  
ctctagatccaatgctgtttttccagtg  
>MITE\_T\_73841  
cactggaaaaaaaagcacattggatctagagtccagactcttaaaacatcgacaagaaaaaataactcttgattcaatcagattgaaacttaaatca  
agaaccaagcctcttaattgagcggatttcctttgatttaggcttaaatctgattgaatcaagagaccattttctgtcaatgtttcaagagtctgga  
ctctagatccgatgtattttttccagtg  
>MITE\_T\_73911  
cactggaagaaaaaacacattggatctagagtccagactcttgaacatcgacaagaaaaaataactcttggttcaatcggattttgcttaaatca  
agaaccaagcctcttaattgagctgatttcctttgatttaagcaaaaatctgattgaatcaagagtatttttctgtcaatgtttcaagagtctaaact  
ctagatccaatgtgtttttctccagtg  
>MITE\_T\_73994  
cactggaaaaaaaacacattggatctagagtccagactcttaaaacatcgacaagaaaaaataactcttgattcaatcagatttaagcttaaatca  
gaaccaagcctcttaattgagcggatttcctttgatttataagcttaaatctgactgaatcaagagtcatttttctgtcaatgtttcgaagagtctgga  
ctttagatccaatgtgtttttccagtg  
>MITE\_T\_74003

cactggaagaaaaagtcgcttgatctagagtcagactcttgaaaacattgacaagaaaaataactcttgattcaattggattttgcttaggtCA  
AGAAcctagcctctaatttaagtagaattccttttgattcaagcaaaaatccgattgagcaagagtatttttctgtcattgtttcaagagtctgg  
actctagatccaagcgacttttttccagtg  
>MITE\_T\_74008  
cactggaaaaataaagtcgcttgatctagcgttcagactcttgaaaataacgacaagaaaaataactcttgattcaatcggattttgcttgaatca  
aaacgaagtcgcttaaatagaggcttggttcttgatttaagctgaaatccgattgaatcaagagtatttttctgtcaatgttttgagagtctgga  
ctctagatccaagctacttttttccagtg  
>MITE\_T\_74068  
CACTGGAcaaaaaagtcgcttgatctagagtcagactcttgaaaacattgacaagaaaaataactcttgattcaatcggattttgcttga  
tcaaacgaaatccgctcaaattaagaggcttggttcttgatttaagcaaaaatccgattgaatcaagagtatttttctgtcgacgttttaagagtct  
ggactctagatccaatgtgttttttccagtg  
>MITE\_T\_74166  
cactggaaaaaaagtcgcttgacgtagagtcagactcttaataatattgacaagaaaagataactcttgattcaatcagatttttcttgaatcgaa  
gagccgagcctcttgattgaggcggatttctgttgattcaagcaaaaagtcggattgaatcatgagtatttttctgtcaatgttttaagagtctgg  
actccagatccaatcgacttttttccagtg  
>MITE\_T\_74176  
cactggaaaaaaaaacacattggatctagagtcagactcttgaaaacattgacaagaaaaataactcttgattcaatcggattttgctgaatcaa  
acgaaatccgcttaaatagaggcttggttcttgatttaaggttagattctgatcgaatcaagagtacttttctgtcgatgttttaagagtctggact  
ctagatccaatgtgttttttccagtg  
>MITE\_T\_74270  
cactgagaaaaagaacacattggatctagagtcagacgcttgaaaacattgacaagaaaaataactcttgattcaatcagattcaagcttaaatc  
aaaaggaaatccgctcaaattaagaggcttggttcttgatttaagcttaaatctgattgaatcaagagtatttttctgtcgatgttttaagagtctgga  
ctctagatccagtgtgttttttccggtg  
>MITE\_T\_74328  
cactggggaaaaaacacatcgatctagagtcagactcttgaaaacattgacaagaaaaataactcttgattcaatcagatttaaacctaaatcaa  
aaggaaatccgctcaaattaagaggcttggttcttgatttaagcttaaatctgattgaatcaagagtatttttctgtcgatgttttaagagtctggact  
ctagatccaatgtgcttttttccagtg  
>MITE\_T\_74440  
cactgaaaaaaaaacacattggatctagagtcagactcttgaaaacattgacaagaaaaataactcttgattcaatcagatttaagcttaaatcaa  
aaggaaatccgctcaaattaagaggcttggttcttgatttaagcaaaaatccaattgaatcaagagtatttttctgtcgatgttttaagagtctggact  
ctctagatctagtggttttttcccagtg  
>MITE\_T\_74464  
cactggaaaaaaatgctgcttgatctagagtcagactcttaaaaacattgacaagaaaaataactcttgattcaatcggatttttacttgaatcga  
agagccaagcctcttgatttaagcggatttcttctgattaaaaaaaccccttgattgaatcaagagtatttttctttcaatgttttaagaatctggactct  
agatccaagcgacttttttccagtg  
>MITE\_T\_74524  
cactggaaaaaaaagtcgcttgatctagagtcagactcttgaaaacaatgacaagaaaaataactcttgattcaatcggatttttcttgaatcaa  
aaagaaatccgcttaaatagagacttggttcgtgatttagcaaaaatccgattgaatcaagagtacttttctgtcgatgttttaagagtctgga  
ctctaaatccaagctacttttttccagtg  
>MITE\_T\_74612  
cactggaaaaaaaaaacacattggatctagagtcagactcttaaaaacatcgacaagaaaaataactcttgattcaatcagatttaagcttaaatc  
aagaaccaagcctctaattgagcggatttcttctgattcaagcaaaaatctgattgaatcaagagtccttttctgtcaatgttttaagagtctgg  
actctagatccaatgtgttttttccagtg  
>MITE\_T\_74717  
cactggaaaaaaagtcgcttgacccagagtcagactcttgaaaacaatgacaagaaaaataactcttgattcaaatggattttgcttgatcaa  
aaggaaatccgcttaaatagaggattggttctcgatttaagcaaaaatccgattgaatcaagagtatttttctgtcattgttttaagagtctgga  
ctgtagatccaagcgacttttttccagtg  
>MITE\_T\_74727  
cactggaaaagaaaaaacacattggatctagagtcagactcttgaaaacattgacaagaaaaaaactcttgattcaatcagattttgctagaatca  
aaaggaaatccgctcaaattaagaggcttggttcttgatttaagcaaaaatccgattgaatcaagagtatttttctgtcgatgttttaagagtctgg  
agtctagatccaatgtatttttccagtg  
>MITE\_T\_74799



cactggtAAAcacacactcttgaccaatgccgcggtgcattgacttaagagtgacgtttctgtcgccggatttaagagcttaaACTCCT  
GTTTCAAGcagatcttgattgattcaagcggatttgattgattcaattcaaaatccgctgaaacacgagtcagactctaaatccggca  
caagaaactgcactctgaaccaagaggttttctACCGgtg

>MITE\_T\_74833

cactggaaaaaaacacattggatctagagtcagactctaaaaacatgaacaagaaaaagtactcttgattcaatcagaatctagcttaaatca  
agaaccaagcctcttaatttaagcggatttcgttttgattcaagcaaaaatccgattgaatcaagagtatttttctgtcaatgttttcaaagctctgga  
ctctagatccaatgtgttttttccagtg

>MITE\_T\_74839

cactggaaaagaaaaacacattggatctagagtcagactctaaaaacgtcgacaagaaaaaataactcttgattcaatcagatttaagcttaaatc  
aagaatcaagcctcttaatttgagcggatttccttttgatttaagcttaaatctgattgaatcaagagtccttttctgtcaatgttttcaagagctgtact  
ctagatccaatgtgttttttccagtg

>MITE\_T\_74861

ctctggaaaaaaacacattggatctagagtcagactctgaaaacattgacaagaaaacggactcttgattcaatcagatttaagcttaaatcaa  
aaggaaatccgctcaaattaagaggcttggttcttgatttaagcttaaatctgattgaatcaagagtatttttctgtcgatgttttaagagctggact  
ctagatccaatgtgtaaattttccagtg

>MITE\_T\_74911

CActgacaaaaaaacacattggatctagagtcagactctaaaaacatcgacaagaaaaaataactcttgattcaatcagatttaagcttaaatca  
agaaccaagcctcttaatttgagcggatttccttttgatttaagcttaaatctgattgaatcaagagtatttttctgtcaatgttttcaagagctctggac  
tctagatccaatgtgttttttccagtg

>MITE\_T\_74972

cactggaaaaaaacacattggatctagagtcagactctaaaaacatcgacaagaaaaagtactcttgattcaatcagaatctagcttaaatcaa  
gaaccaagcctcttaatttgagcggatttcgttttgattcaagcaaacatccgattgaatcaagcgtatttttctgtcaatgttttcaagagctctggac  
tctagatccaatgtgttttttccagtg

>MITE\_T\_74977

cactggaaagaaaaacacattggatctagagtcagactctgaaaacatcgacaagaaaaaataactcttgattcaatcagatttaagcttaaatca  
aaaggaaatccgctcaaattaagaggcttggttcttgattcaagcaaaaatccgattgaatcaagagtggttttctgtcgatgtttttagagctctgg  
actctagatccaatgtgttttctccagtg

>MITE\_T\_75205

cactggaaaaaaacacattggatctagagtcagactctaaaaacatcgacaagaaaaaataactcttgattcaatcggatttttgcttacatca  
agaaccaagcctcttaatttgagcggatttccttttgatttaagcaaaaatctgattgaatcaagagtatttttctatcaatgttttcaagggctctggac  
tctagatccaatgtgttttattccaGTG

>MITE\_T\_75229

CACTGAAAACgaagtctcttgatccagagtccaaactcttgaaaaattgacaagaaaaaataactcttgattcaatcggatttttgcttgaa  
tcgagagccaagcctcttgattcaagcagattttcttttgatttaagcaaaatataattgaatcaagagtattttatctgtcaaatcttaagagctg  
gatttatgatccaagatactttttccactg

>MITE\_T\_75238

cactggaaaaaaacacattggatctagagtcagactctaaaaacatcgacaagaaaaaataactcttgattcaatcggagttttgcttgatcaag  
aaccaagcctcttaatttgagcggatatccttttgatttaagcaaaaatctgattgaatcaagagtatttttctgtcaatgctatcaagagctcggact  
ctagatccaatgtgttttttccagtg

>MITE\_T\_75303

CActagaaaataaaacacattggatctagagtcagactctaaaaacatcgacaagaaaaaataactcttgattcaatcagatttcagcttaaatca  
aaaggaaatccgctcaaattaagaggcttggttcttgatttaagcttaaatctgattgaatcaagagtatttttctgtcaatgttttcaagagctcggac  
ctctagatccaatgtgttttttccagtg

>MITE\_T\_75366

cactggaaaaaaacacattgaatctagagtcagactctgaaaacattgacaagaaaaaataactcttgattcaatcggattttgcttgaatcaaaa  
cgaaatccgcttaaaatgaaggctcggttcttgatttaagcttaaatctgattgaatcaagagtacttttctgtcgatgttttaagagctcggactct  
agatccaatgtgttttttccagtg

>MITE\_T\_75400

cactgaaaaaaaaaaaaatatagtatattttaccatactctgacacagcgATCCGAGTATGGTGATCAACACCAGATTGt  
gtggtagcatttaccatattgtgTAAGAATCACCTGcattctggtgaatactaccatAATTCTGGTCGTTTTCACTG  
ATTAGGGcattgtgtaaaaaatcaagtaagaCCTATTGTAGCCGTTAccatactatttttccagtg

>MITE\_T\_75415

cactggaaaaaaacacattggatctagagtccagactcttgaacattgacaagaaaaaggactcttgattcagtcgatttaagcttaaatcaa  
aaggaaatccgctcaaattaagaggcttgggtcttgatttaagcttaaatctgattgaatcaagagtattttctgtcgatgtttcaagagtctggact  
ctggatccaatgtgtttttccagtg

>MITE\_T\_75455

cactggaaataaaaacacattggatctagagtccagattcttgaacattgacgagaaaaactactctcgattcaatcggattttgcttgaatcaa  
aacgaaatccgcttaaattaagaggcttgggttttgatttaagctagattctgattgaatcaagagtacttttctgtcgatgttttaagagtctggact  
ctagatccaatgtgtttttccagtg

>MITE\_T\_75476

cactggggaaaaaaacacattggatctagagtccagactcttgaacattgacaagaaaaataactcttgattcaatcagattttgcttaaatcaa  
aaggaaatccgctcggattaagaggcttgggtcttgcttaagcaaaaaatccgatcgaatcaagagtattttctgtcgatgttttaagagtctgg  
actctagatccaacgtgtttttccagtg

>MITE\_T\_75529

cactggaaaaaaaccacattggatctagagtccagactcttaaaaacatcgacaagaaaaatacttttgattcaatcagatttaagcttaaatcaa  
gaaccaagcctctaatttgagcggatttcctttgatattaagcaaaaatctgattgaataaagagtagttttctgacaatgtttcaagagtctggac  
tctagatccaatgtgtttttccagtg

>MITE\_T\_75589

cactggaaaaaaacacattggatctagagtccagactcttaaaaacatcgacaagaaaaataactcttgattcaatcggattttgcttaaatcaaga  
accaagcctctaatttgagcggatttcctttgatccaagcaaaaatctgattgaatctagagtattttctgtcaatgtttcaagagtctggactct  
agatccaatgtgttttctccagtg

>MITE\_T\_75698

cactgggaaaaaaacacgttggatctagagttcagactcttgaacattgacaagaaaaataactcttgattcaatcagattttgcttgaatcaaa  
acgaaatccgcttaaattaagaggcttgggtcttgatttaagctagattctgattgaatcaagagtacttttctgtcgatgttttaagagtctggactc  
ttgatccaatgtttttttcagtg

>MITE\_T\_75776

cactggaaaaaaacacattggatctagagtccagactcttgaacattgacaagaaaaataccctcgattcaatcggattttgcttgaatcaaa  
acgaaatccgcttaaattaagaggcttgggtcttgatttaagctagattctgattgaatcaagagtacttttctgtcgatgttttaagagtctggactc  
tagatccaatgtgtttttccagtg

>MITE\_T\_75954

cactggaaaaaaacacactggatctagagtccaaactcttaaaaacatcgacaagaaaaagtactcttgattcaattagaatctagcttaaatcaag  
aaccaagcctctaatttaagcggatttcgtttgatcaagcaaaaatccgattgaatcaagagtatttttctgtcaatgtttcaagagtctggactc  
tagatccaatgtgtttttccagtg

>MITE\_T\_75979

cactggaaaaaaacacattggatctagagtccagactattgaaacattgacaagaaaaataactcttgattcaatcggatatttgcttgaatcaaa  
acaaaatccgcttaaattaagaggcttgggtcttgatttaagctagattctgattgaatcaagagcgttttctgtcgatgttttaagagtctggactc  
tagatccaatgtgtttttccactg

>MITE\_T\_75984

cgaaggaacgtaagtccgtttcaaggttgcaaaattgactcgaacaattcgaTTCTTTGCAATAATATACCTGGGAAATTt  
ttgtccggaatttttaattgttgcatgatcagaggaaaaatcagtgaaagtttcagtcggaaattccaagattttccttgtaaaaataatttgcg  
acaggaaatttggaacattggaatgaagttacgttccttcg

>MITE\_T\_75987

tggacgtatttctgtcaaacggaactaagcgcaaaattgagttcctttgaggattttagaatcccggatagcgcgttctgtcaaacggaactaagc  
gccttgaaaagcattgcgagtatacgacggaacgagcatctcgctacgcaaccccgcaatccaagccccctctcccttctccccctatg  
gcgcttagttccgtttgatagaaatatacgTCCA

>MITE\_T\_76204

caccgaaaaaaagtgaagttgattcaacattctggatgtaggaaaagtgtgcgagaacttatacaaaatgctaaattacccgccgcagcagttat  
tttcatcttggcattgctgtaGTAATACTGGTAATTCAGTAACtaccgggaattcagcattttgtaagttctgcacactttttt  
acatccagattgttaaatcaacatcgtatttttcgggtg

>MITE\_T\_76343

cactgaaaaaaagattggtagaattaccatttctcacgctgTACTTCAcaaatttagagtcaattctgccagaagaaaggtaaactgtact  
atatactggtacaggtaacctcGAATCAGGTTAGGTgaccattcctctggcagaatcgacttcgaattcacgctgtgtgaaatacag  
cgtgaaggaatggtaaattctaccaatctttttttcagtg

>MITE\_T\_76444

aaacgccgtaaaccgcatctttacattgtttgaaacaacgtatcatagcagaaaaacttgggtaccttgggacaatgttttacagaattctttcgcaa  
atactatcaaaaacttaactggaaaatttgaggtgcatgggtaaaacagttttcatgttatagagtttaactttttacgttccaaaaaacgagggaaa  
atcttgatggatttacggcgttct

>MITE\_T\_76477

tggacgtatttctatcacacggaaccaagcgccatcaggggaggaagggagaggggggttggattggcgggtgttcggaacgcgatgctc  
gttccgtctatactcgcaatgctttccatggcgcttagttccgtctgacagaacgcgctattcgggattctaaaatctcaaaaggaactcaattg  
gcgcttagttccgtttgacagaaaaacgtcca

>MITE\_T\_76863

cttccacactgaaaaaaataatgtctgttttagcatctaggaagTCAataatgtgtctggatcccaagatgctgcctttactgccccgcagtt  
aactttacatcctgcgaatgcaaattcaattgcatgagcaatcaaggcagcatcttaggatcaccagacacattttgacaccttaggtgctaaaac  
agcataccatttttcagtggtgaag

>MITE\_T\_76910

cactcaaaaaacaagtatgggaagagagacttgcggccgagttatggatcatggagtcagaaatatagttcgtggagccatgcttatgCTT  
ATAGGTTCAAGACCAATAAGGtatatggctcagaaagccatactgtagacggtaagtacatttggtagaaaatatggatctcc  
gagccatttttatgggtctcagagtcataccttttttgagt

>MITE\_T\_77059

cactggtaaaaaaacctcttggaccaatgccgcggtgcattgacttaagagtgaagtttttgcgccgatttaagagtctgaactctgtttcaa  
gcgtattttgcattgattcaagcggattttgcattgaacaagagtctagactcttaaatccggcgacaagaaactgcactcttgaaccaagaggttt  
ttttttttttttaccagt

>MITE\_T\_77069

CACTGAAAGAAGAGTGaaattgatttaacattttggatgtaaaaaagtgcgaGAGAACTcgtaaaatgctgaattaccggc  
cacagcagttagttttacatcttggcattgctaaagtaactgccttagcgggtaattcagcatttcataagttcttagttctgcacacttttttacatc  
cagaatgttaaatcaacttcatttttttcggtg

>MITE\_T\_77287

GGccctacacagaaaaaatagatgatGCTGACGACAGAGCCTTCTGTTCACCGGGCTCGTGCTGTTTC  
TTTGTTACACctacaaaattttctgtgtgagaacagaacttcggctgagggaatagagtactctgtcctcataacggaagcttctgtgac  
cggtacaaaagaagtgcaggagcacTGTGaacagaagtattttttcagtgtaggcc

>MITE\_T\_77290

cacggaaaaaaaatttgctaaagtaacatcctaaatgttaaaaatctgcgcaacaactcttgaatgttgacaTGAACGCTAAGGTT  
GTTAATTCAACGtagctaggatgttactttaacagccagagtGTCCAtgacaacattcaagagttgccgcgctattttaacatcac  
ttaatccgggatgttactacagaatttttttttctgtg

>MITE\_T\_77318

cacgaaaaaatggattgctgatttaacaattcaattgttaaaaaatgtgacAGACATGTTTCAagtgtacattttacaatagggGAA  
AGCTGATTCAACCACGGGCGTGGAacatcagcatttttttgtaaatctacattgaacatcaCTTTTGGTGTA  
TCACccttttaactacaaaattgttaaatcagcaatttcatttttttcgtg

>MITE\_T\_77378

cacggaaaaaatggattgctgatttaacagtttaatatgttaaaaaatatttccgacatgcttcaaattacattttacaaaagtggagagctaattaac  
cacgaggggtggttaaattggcattttttttttattgtaaaatgcacATTGAAACACGCTGGACACTTTATTtagctacaaaa  
ttgttaaatcagcaatctcatttttttcggtg

>MITE\_T\_77396

cactgaaaaacaagtaacttggatcaagcatgatgattctaaatttgcgacaagaattttaatatcttacttcaagctgacttttcttgatacaaga  
aaaataatgttcgggttaagcaaaaaagtagcttattatataaccagaaaaattcttgatttaagaagataTACtacttggcggcaatttaag  
atccttttttttcagtg

>MITE\_T\_77579

cactgaaaaaatggatgctgttttagcacctaggatgtcaaaaatgtgtctggatcctatgatgctgccttgattggccacgcagttgaatta  
gcattcacaggatgtaaagttaactgcgagggcagcaATGACAGCATCTTGGAATCAACAGACACAgtttgacatcc  
taggtgctaaaacagcatattatttttttttcagtg

>MITE\_T\_77585

CACCGAGAAAAGAAGATTGCGGTAGAAATTTACCGTTCCTTCACGATGtgtttcacacagcgtcaatat  
tcagagtcaattctgccagaagagaggttaaacgttactatatactgatacaggttaaccattcctctggcagaatcgactttaattcacgctgtgtaa  
aataaaaaatgaagggaatggtaattctaccaatcttttttctcagtg

>MITE\_T\_77605

caccgaaaaaaaaagtgagttgatttaacattctggatgtagtagaagtggtgcgagaactataaaatgctgaattaccaccacaacagttagttt  
acatctggcattgctaaaggaACAGCTGTAGCGAGCGGGTAATTCATCATTTTGTAAAGCTCTCGCAC  
ACTTCTTTTATATCCAGAATGTTAAAtcaacttaacttttttcggtg

>MITE\_T\_77608

cactggaaaaaaaaagattcttaaatgtccgccaagaagtatttctttaaatacaagaagtttGCTGGtcaataaagctactttttgcttaac  
ccaagcattattttctgaatcaagaaaaagtcagcttaagcaagataaagaaaaattcttggcggcaaattcaagaattatcatgcttgatccaag  
ctactattttttcagtg

>MITE\_T\_77631

cacggaaaaaaaaagtgtaggggttatcccataaaattgtgtactaccccaatttgatggatgatatgggcatctctaattaattgtggtagcaccg  
caactcacgttagggtagtaccgcaacatttgggttagttacctaatttattgggggtactaccataattaattggaaatgtccatatcatccaacaacc  
tcgtacTTTTTTTTTCGTG

>MITE\_T\_77634

cactggaaaaaaaaagtagcttggatcaagcatgatgcgattcttgaattgtccgccaagaaattttttatcttgctttaaactgactttttctgataca  
agacaaataaggcttgggttaagcaaaaaagaagcttatattaagcagaaaaattcttgatttaagaagaaatacttcttgaggcaaatttaagatt  
ctttttttccagtg

>MITE\_T\_77639

caaggaaaaaatggattgctgatttaacaaataaattgttcaaaaatatgttcgacatgtttcaaattgtacatttttcaatGGTGGGAAGCT  
AATTCAACCATGGGGGTGgagaaattagcattttttatcgtaaaatctacattcaTTGCAACATGACGGACAAA  
Ttctttaactacaaaattgttaaatcagcaatttcgtttttccgtg

>MITE\_T\_77744

cactcaaaaaaggtatgactctgagaccataaaaaatggctcggagatccataatttctaaccaaaatgacttaccgtctacagtatggctttct  
gagccatacttcattggctgtaacctataagcatggctccacgaactatattacATGGCttcatgatccataactcggccggttaagtcacttt  
cccatacttgtttttgagtg

>MITE\_T\_77848

CGCGGACTAAAAAtgtattgctgatttaacaattacattgttaaaaaatatgtctgaCACGttccaaatgtacattttacagcAGAGA  
AAACCTAATTTAACCATGGAGATGATTAAATTATAGCATTTTTTAACTatgaaatctacattgaaacatgt  
cggacattttttaaactacaaaattgttaaatcagcaatttcattttttccgtg

>MITE\_T\_77891

actacaccggaaaaaaaattgccgaagTAACACCCcgaatgttaaaaatctgcgcgaCAATTATTGAATGTTGTTATG  
GAcactctggctgttaaagtaacatcctagctaCGTTGAATTACCAACCGTAGCGttcatatcaacattcaagagttgtcacg  
CAGATTTATAAAATCCGGGATGTaacttcagcaattttttccgtgtatgt

>MITE\_T\_77912

tggcttttaaccaattagtggttcatatggaacaccactaatagcaGTAAAGGCAACATACATATAATAGTAGCACAT  
ATACCATAGTGATGGTATATATACCTTAGTATGATACGAGATACtctcagtatgggttcacagaccgagaatcat  
tagttcatttacgactatcAGTGGTGTTCAtgtgaaccactaattgggtttacaaagcca

>MITE\_T\_77931

cactggaaaaaaaaagaatcttaaatgtccgccaagaagtatttctcctaaaatacaagaattttgctggtaatatcgtactttttgcttaacca  
agcattacttttctgaatcaagaaaaagtcagcttaagcaagataaagaaaaattcttggcggcaaattcaagaattatcatgcttgatccaagcta  
ctttttttcagtg

>MITE\_T\_77946

ATTACACAGATAAAaaagatgggtgctgacgacagaatcttctgttcacagggctcctgcagtttcttgttacacgtacagaattttctg  
ctgtgagaacagaacttcggctgtgggaacagagtactctgtcctcataacggaagcttctgtgcctgttataaaagaagtgaggagccgtgtg  
aacagaactattttttcagtgtaaa

>MITE\_T\_77954

TTGCCCTTTGCACATGTTACCGCGAGTGTTTTACTGAAAGTGGGGGTCATGGGTGGGgtgc  
atcactcatcgatgattgTGAAATGTGTTGCGAAAACCTCATTGATGATCGTGAAATTTGCGCGGG  
CTCCGCAAATTTCACTATCATCGATGTGTGATGCACTGATGACCCCCACTTTCAAActaaaactt  
gcaacgtgtgcaaaGGGCA

>MITE\_T\_77965

Cacccgaaaaaaaaaggatgccaaactgacattctggatgtaaaaaagtggtgtgacaactcacaaaatcgctgaattaaccgccacagtagtta  
attttacatcttgacattgctgtgtaactgctgtggcagtttaattcagcgtttgtgagttgtcgcacactttttacatccagaatgttacgtcagcat  
cctttttttccggtg

>MITE\_T\_77997

caccgaaaaaaaaagtgaagttgatgcAACATTCAGGGTGTAaagaaagtgcaagaacttataaaatgctgaattaccctcTACAGCAGTTAATTTAGCAATggcaagatgtaaaactaactgctgtgggtgggaattcatcattttataagttctcgcacacttcttta

>MITE\_T\_78016

cactgaaaagaaaaaaaaaactttaatttgcgccaagaagtatttcttcttaaatcaaaaattttctgggtaataataagctactttttgcttaacccaa

>MITE\_T\_78023

caccgaaaaaaaaagtgaagtcgaTTAAACATCCTGGAAtggaaaaaaagtgtgcgagaactcacaaaatgctaaattaccactac

>MITE\_T\_78079

cactgaaaaaaaataattttaatttgcgcccagaaagtatttcttcttaataaagaattttctgggtaataataagctactttcttgcttaacccgaaca

>MITE\_T\_78137

cactgaaaaaaaataatatgctgttttagcatctatgGTGTCAAAAATTTGTCTGGTGATCCAAAGATGTTGCCTT

>MITE\_T\_78156

cacctaaaaaaataacatgctgttttagcacctaggatgttaaaaatgtgtctggatccggaGATGTTGTccttactgccttcgcagttaa

>MITE\_T\_78189

caccgaaaaaaagtTGGGTTGAATTTACCatattctggtaaaaaacggcacaatAAGAGCGTatggtaactttcatcaaaat

>MITE\_T\_78261

cactggtaaaaaaaaactcttggaccaatgccgcggtgcattgacttaagagtgcagtttctgtcgccggatttaagagtcttgaactctgtttcc

>MITE\_T\_78269

cactgaaaaaaaagtagcttggatcaagcatgatgattcttgaatttgcgccaagaatttttttcttgcttaagctgacttttctgatacaaga

>MITE\_T\_78424

cactgaaaaaaatagtagctacttttagcacctaggatgtcaaaaatagtctggatcccaaatgctgcctttactgccttcgcagttaacttga

>MITE\_T\_78447

cactggaaaaaagaatcttaatttgcgccaataagtatttttcttaaatcaagacttttgccttaataataagctactttttgcttagcccaagca

>MITE\_T\_78454

cactgaaaaaatggtagctgttttagcacctaggatgtcaaaaatgtgtctggtaatCTTATGATGCTGCCTTAACTGCCC

>MITE\_T\_78511

cacggaaaaaataggctAGTCGACACGACCAGCGGCTAGTTAAAACTgtgccagctaccgtgcggtagttacgata

>MITE\_T\_78602

cactggaaaaaagaatcttaatttgcgcccaagaagtatttcttcttaaatcaagaatttcgcTGCTGAATATAAACTACTTGT  
CTGCTTAACtcaagaagtatttcttctgtatcaagaaaaagtcagcttaaagcaagataaaaaaatcttggcggcaaattcaagaatcatc  
atgcttgagtcagctactttttccagtg

>MITE\_T\_78608

cgtgaatcactaaatacaaaaagggcacaagtccagaaaaccaaattgttcaggagacacaaaaaactgttcatttcgtggtagatatttttaaa  
catagtcgttatgtttaaaaaaatatctaccacgaataaacagtttttaagtctcctgaacaatttggtttctggacatgtgcccttttgaaTTC  
AGTGATTACAG

>MITE\_T\_78617

cactgaaaaaatgggatgctgttttagcaccaggatgtcaaaaatgtgtctgggtgatcctgaGACGCTCCCTTGactgccacgca  
gttgaaattgcattcataggatgtaaagttaactgcgagggcagtaaaggcagcattttgggatcaccagacacattttgacatcctaggtgctaa  
aacagcacattatttttcagtg

>MITE\_T\_78622

cacagaaaaaatagatggtgctgacgacaaaaCCTTccgttcacagggctcctgcagtttctatgttacacttacagaatttttattgtcgtga  
gaacagaacttcggtcgtgggaacagagtaactgtcctcataacggaagcttctgtgactgttacaatagaagtgcaggagccctgtgaacaga  
actattttttcagtg

>MITE\_T\_78634

cactgaaaaaataataactgttttagcacctgggatgtcaaaaatgtgtctgggtgatcccaagatgctgcctttactgccttgacgttaactttac  
acCCTGTGAATGTAAATACAGCtccgtgggcaatcaaggcagcatcttaggatcaccagatccattttgacatcctatgTGG  
TAAAACAACGTATCATTTTTTTCGTG

>MITE\_T\_78687

ttcaaaagtcacgcaccactggccatgagggggggcgccatttgaaattttgagttgcagcccgtcccccccccccccccgggggggggggg  
aactggaaagtacctgaAAAAGTTTGCTTtcaatatgaggaaaaacgccacaaACCGCATATCGATATCTAAATT  
AGAACTtaagttaggccagtggtgcgtgacttttgaa

>MITE\_T\_78714

CAGTGGAATCGGATATTCCGACATCGCTTATACGACCGATATGACCGAAATATCGGTCAT  
GACGATGAGCGATCCGGTCGTACCCGTGATTGACTTCCCATTGACTCACAATCAGAGTAT  
TTATTGTGCATGGGTTATAACGACAATCGGATATAACGACCAAATCAGGCCGGTCCCTAG  
AGGGTCGTTGTATCCGATTTCTACTG

>MITE\_T\_78718

ttcaaaagtcacgcaccactggccatgaggggggtggccatttgaaattttgagttgcagcccgtcccccccccccccccgggggggggggg  
ggctggaaagtacctaataaagtttccctcctaataaaggaaaaacgtcataaacgcaaatcgatatcttaattagaactaaagttatggccagt  
ggtgcgtgacttttgaa

>MITE\_T\_78809

cactgaaaaaaagtacgggctgtatagacgtaccgtccgtcccgactcagaggccgaaacttccgggtgctggagccgtagcttcgattgc  
tccgggtgctacgcccttaactttcggcctctgagcccgaacacggaagtatgtctacatagcccgttaagtacggcttcacggccggaatttt  
ttttttcagtg

>MITE\_T\_78815

TACCCATGTCAACATCGCTAAGATTGTGAACTTTCCCTTCTTTTTACAAGTATCCGAAAT  
CAACCACACAATACATTTCTCtgccaaaatattcagaaaaatagaaagaaatttgaggcaaatttcaaaaaaatgcttAAA  
GCTCTCTACCAACTAAACAGTTGAAtgtatgcacaatcttagcaaaagTTGAAATGGGTA

>MITE\_T\_78819

TCACTGAAataaaactccggccgtggaggccgtacttacgggctatatagacataccgtccgcgttccgggctcagaaacTGAAA  
GTAACGggcatagcaccggagcaatcgaagctacggctccagcacctgaactttcggcctttcaaccggaacggacgggtatgttat  
atagcccgttaactattttttcagtg

>MITE\_T\_78908

aaaaaaaaaacctcttggttcaagagtgagtttctgtcgccggatttaagagtgctggactctgtttcaatgcgaaattcgcttgaatcaatgcaaa  
atccgcttgaacaagagttcaagactcttaaatccggcgacaagaaactgcactcttaagtcaatgcaccgcggcatcggtctaagagggttttt  
ttt

>MITE\_T\_78913

TCATTACGGTAGAAATCTGATACAACGACCTTCTAGGGACCGGCCAAATTTAGTCGTTTT  
ATGCGATTGTCGCTATAATCGATGCTCCAGTCCATTGAATAAATGGGATGTCAGCCACAG

GACTAACCAGATTGcaggtcgttataaccgatatgtcgttataagCAATGTCGTATTATCCGATTTCCACTGT  
ATAtga  
>MITE\_T\_78918  
cacggaaaaaattatatagtgctgagcactaactgttttagatcaaataGCCAGCTAGTATGGCAGTAGCGCTGATCC  
TTAAAACTTTCCGGTCCAGCCCTACAGACGGTAGGTCTCAGCAGTACTGCCATatcagctggct  
ccatttgagcTCAGCTTTTTTGccttagtgctcagcactatcgtttttccgtg  
>MITE\_T\_79035  
atgtccattttccagtcttcagttttttgagttgataacacttttcggagttggatgcaaccacgaaagtggcATTAATACTCGTCTCC  
GGGTACCTCAATCGCAGCACGAGTCCTCTCATCACTTTTCGGGGTTGaatcaactctttaaattattatc  
aactcaaaaaaactgaagactgcaaaaatggacat  
>MITE\_T\_79086  
ggagaggtcggacaaaatctggaaactttgaaagcttatattatcgaaaatatgaacaagaaACTTTGAGAGTAGTGCCATT  
GGTTTTTCTGTgagattttccttcagaaaacaccctttgaaattgaatttggacgaaataaactgaaaaatttgaaattttagcctaaaatt  
catgtccgatcttc  
>MITE\_T\_79250  
TCTGAAAAAACGACGGATGTTAACAATTGCTGTTTTTCAGGGAGAGCAGCTTTTTTTTAAT  
GTACGGACCCTCAAAAGCACGTGTACAAATTTTTGGAACCAGGTCTCAATTCTGGAGTga  
gaaatcaggcaaaaactgTGTATATGTAAAAAAGGCGGATGTCATGTCAACATTCGTTGTTCTTTC  
ATA  
>MITE\_T\_79398  
CAGTAGatatcggtaatacagacattCAAGGGGTCACGGGATTTTCGTCGTATTAGCCGACATGTTCGTA  
TTAACCGTTGTCGTATTAACCTTATGGAGTTTCGCCGGGGAAAACGAAATCCGTCGTATTA  
GCCGatatgtcgtattaaccgatgtcgtattaaccgatgtcgtattaaccgatatCTACTG  
>MITE\_T\_79418  
CAGTCGGCCCCGCTTACTTGGGGCACATCCGTCCCGGGCGGTTTTGTCCCAAATAACCG  
GGTGTCCCGATAAAACGCAGTTTTCCCGTAAAAAAAAGATAGTATATAAAAGATTCCGTC  
CCGAGCGATTTTGTCCCAATAAAGCGGTTGTCCCGATTAACCAGTGTCCCAATTAAGCGG  
GGCCGACTG  
>MITE\_T\_79445  
AGAATctaataccagtggtggtggtgctttgataaaatcgattgatctgtcattcaaacctatggaaaaggatcgataaacagggtgttcgca  
gcaaacaccttgataatcgattcttgaccatagCCTCaattggagaaatatcgataaatcgatcattcacgccacgccactgatctaaTCCT  
>MITE\_T\_79457  
CAGTAGATATCAGTTAATACGAcacggttaatacagacatatCGGCTAATACGACGGATTTTCGTTTTTC  
CCCATTATGGCGAAACTCCATAAGAGAGCATGTAAAGTATGTATCGGTTAATACGACGTATC  
GAATAATACGACGAAATCCCGTGACCCCTTGaatgtcgtattaaccgatTTACTG  
>MITE\_T\_79462  
CATTGGAAATCGGATATTACGACTTCGGTTATAACGCCATATCGGTCATATCGACGTGCGA  
TTTAGTCGTACCCGGGATTGACTCCCCATTGACTCAATGTATTTTTGCGACGGTTATAACG  
ATAATCGGGTATAACAACCAAATTAGGCCGGTCCCTAGAGGGTCGTTGTATCCGATTTTC  
ACTG  
>MITE\_T\_79632  
CAGTACTTTCTCTCTGTAAACGACTATCGTTAAAGCGAAAATCTCCCTGTAAACGAGGAAAT  
CGATCGGTCCCTTGAACCTTATTCCTATATTAAATATCGACTATCGTTATAACGAGAATCTCT  
CTATATCGAGGAAATCGGCCGGTCCCTTGAGTTCTCGTTACCGAGAGTACAGAAAGTACT  
G  
>MITE\_T\_79642  
AAGgggcagatacacctgcgagctaGACGTGCGTCttgagcggcgagtaggccttcggccatgttcggcaatcttcgtagccaatc  
aggtcaCAGCTCGCCACTCATAATTTGCTCACAGTAGGATCAGATCCTACTTTTCGGGTAAA  
GACGCGCGTGTAGcgcgcaggtgtatctggctCTT  
>MITE\_T\_79797

cagtaaaagctcgtgaagtgaactaCGGTTAATACGAAATACTGATTAGGTCGAATATTTTTTTGATCTC  
TAGACCTCTAGCCTCGTCCATAAGTTAAGTGGAGAATCGGTTAAGACAACCTAGCCGCGT  
AAGTCGAATTTTTTCCGGTCCCTACAcaattcgacttagcgagctttcactg  
>MITE\_T\_79803  
tgaatatcagtgggcgtggcgtgctttgcgatgtatcgattgttatgtcatttaacctatggaaaaggaggatcgataatcaggggtgttcgcagcga  
acacctcggaatcgattctttaccctaggtttaaatggcagaatagcgatatatcgaaagcacgccacgccactgattattaa  
>MITE\_T\_79865  
Gtgacatcagtgggcgtggcgtgaatgatcgattctcgatatattccccatttgaaggtatagtgaagagtcgattattaaggtgttcgttcggaacac  
cctgtatatcgatcttttccatgggtttaaatggcagatcaatcgatatatcgaaagcacgccacaccactgagtGACATC  
>MITE\_T\_79909  
atctaaagcagtgacgtggcgtgctttgcgatgtatcgatatattccccatttgaagctgtggtaagtaatcgattattaaggtgttagctgcgaacac  
cctgtttacggatacttttccataggtttaaatggcgtgatcaatcgatacatcgaaagcacgccacgcctctgatctaaat  
>MITE\_T\_80097  
tgtgttttagcacctgggatgtcaaaaatgtgtctggtgatcccaagatgctgcctttactgccccacagttaattttacatcgatcatgtgaatgca  
aattcaactgcatgggcaatcaaggcagcatcttaggatcaccagacacattttgacatcctaggtgctaaaacagca  
>MITE\_T\_80129  
CTAAactagcattggcgatccagcaaatggcaacgggtgttttctccatttaaacctatggaaatatatcgattctctgaggggccaggtgctc  
cgacaagaatcgattatttaacataggtttaaatggagaaaatccgggtgttgccaaattgctggatccgcctctgctaaCTAG  
>MITE\_T\_80155  
GGTCAAGGCGAATAAAGAAAGGTGGCCGAATTTTGAGTTGAGCCGTCATTTTAAAGGCT  
GTGATGTGCAGAGGGTACATGCTTTACCATGCAATCAGGATGTACCCTAAACGTACCAGA  
TGCTgtgtgacgtcaagaggtacaAAATGCGACCACTGTCCTTTATCCGCCTTGCAGC  
>MITE\_T\_80158  
cagacgctattagtggcgacgtcatcatagggattctccattatatcgaattggatccaacaataacattggcataacaccttttaaatgctaccagt  
gcgaaaaaatcgatatatatcgcttttctgtgacgttgactaatagcgtctatgatgacgtcgccactaatagcgtcta  
>MITE\_T\_80212  
Cgtcgtcagtgggcgtggcgtgctttgcgatattatcgactgatcgaccatttaaacctatggaaaagtatcgataaacaggggtgttcgcagcgaaca  
ccttaataatcgattatttaccacagctttaaatggggaaatatcgatagatcgcacagcacgccacgccactgtaacgACG  
>MITE\_T\_80269  
cagtgaagctcgtgaagtgaattATGTAGGGACAGACGAAAAATTTGACTTAGGGCGAAAAATTCGTC  
TTAACCGATAACTCCACCAAACCTTATGAACGTTTCTAGGGACCGTAAAAAAACTTCGAC  
TCAATCGgtatttcgtcttaaccgtagttcgacttagcgagcttttactg  
>MITE\_T\_80287  
ttaatcagtgggcgtggcgtgaactgagatatatcgattgttatgccatttaaacctatggaaaaggatcgattaaaaggggtgttcgcagcgaacgc  
ctttataatcgattcttaccataggtttaaatggcataacaatcgatacatcgcaattcacgccacgccactgctattaA  
>MITE\_T\_80383  
gagtacctttatagcgagagtatggacagatcgcttgatggagagcttagggcccaaaagtgcagccacccttctgagcaacttctaacgcacg  
aaatttcactgccagcctacagatttcaattctaaccaagatgggtcaagaatgtacataaattagcattcttccggaaaaataagtaaaattatgcaaa  
aagtaagccaatcacatgctttataaacgacgggttcgtaacaattgtatttgaatcactctggacatttgaattcataggttggtgcatttctggg  
ccctaactttatcgcggaggtcatcggtgaaggtctgatgaatttccagagtttcacatctgtctatactctcgtatacaggtacttagatttaCC  
GAGCAGGTAACATtgcgtagagtcctttatactgagagtcagacaattcgggtcatggatgtcacaacgggaataaagggtcaca  
gaaattgaacgttttctgaatctttgatcgccattctcaaatgcctttctcgttctcttattccgtttgttccctgccgaaccgtaattccctg  
gtccattccagattataatctttgcaattggtgaaaatgtaattcttattccgtttgtgacactgtggaggcctaaaatacgggaaccaatcagaat  
ggattcaaattgtcttgactctcagtataaagggactc  
>MITE\_T\_80389  
attatcagtgggcgtggcgtgaattgcgatgtatcgattgttctgccatttaaacctatggtaaagaatcgattattaaggtgttcgctgcgaacacct  
gtttatcgattctttccataggtttaaatggcagaacaatcgatacatcgcaattcacgccacgccactgcttat  
>MITE\_T\_80418  
TGCTGTTTTTCGCACCTAGTATGTCAAAACTGTGTCTGGTGATCcgaagatgctgcctttactgcctggC  
ACTAagctttacatcctatgaatgcaaagtcaactgcgtgggcaatcaaggtagcatcttaggaccgacagacatattttgacatcctaggtg  
ctaaaacagca  
>MITE\_T\_80446



ttgcagtggcatggcgtgaatgatcgattatcgatatttctccatttgaagctatggtaaagaatcgattattaaggtgttcgctacgaacaccccttct  
atcgatccttttccataggtttaaatgaccgatcaatcgataaatcggaagcgcgccacgccacgccactggta  
>MITE\_T\_80809  
gaacagtggcgtgggtgtgaattgctatacatcgattgatatgtaatttaaaccctatggtaaagaatcgattattaaggtgttcgctgcaacacccctgt  
ttatcgatccttttccataggtttaaatggcagatcattcaatatcgcaaagcacgccatgccactggcc  
>MITE\_T\_80841  
attcagtggcgtggcgtgctttgcatatatcgattgttgcgccatttaaaccctacggtaaagaatcgattattaaggtgttcgctacgaacacccctgt  
tcacgatccttttccattggtttaaatggcacaacaatcgatatatcgaaagcacgccacgccactgttt  
>MITE\_T\_80847  
agcagtggcgtggcgtgctttgcatatatcgattgttatgcatataaacctatggtaaaggatcgataaacaggggtgttcgagcgaacacctt  
aataatcgattctttaccataggttaaatagcataacaatcgatacatcgcaattcgcgccacgccactgacgt  
>MITE\_T\_81325  
ttgcagtggcgtgggtgtgaattgcggtatatcgattgttattccatttaaaccctatggaaaaggatcgataaacaggggtgttcgagcgaacacctta  
ataatcgattattaccataggtttaaatggcataacaatcgatacatcgcaattctcgccacgccactgaca  
>MITE\_T\_81696  
cgccagtggcgtggcgtgaattgcgatgatcgattgttatgccatttaaaccctatggtaaagaatcgattattaaggtgttcgctgcaaacacccctat  
ttatcgatcctttttataggtttaaatggcataacaatcgatacatcgcaattcacgccacaccactgttg  
>MITE\_T\_81804  
TTccgagtggcgtggcgtgcttttcatatatcgattgatctgccatttaaaccgataggaaaggatcgataaacagaatgttcgaacagatac  
cttaataatcgattcttaaccatagcttcaaatggggaaatatcgataatcgatcattcacgcctcgccactgaa  
>MITE\_T\_82246  
gccagtggcgtggcgtgaattgcgatgatcgattgttttgcatttaaacttatagaaaaggatcgataaacaggggtgttcgagcgaacgcctta  
atactcgattctttaccataggtttaaatggcataacaatcgatacatcgcaattcacgccacgccactggc  
>MITE\_T\_83086  
agccagtggcgtggcgtgcatgatcgattatcgatatctgccatttgaaactatggtaaagaatcgattactaaggtgttcgattacaccctgataa  
tcgatcctttttcataggtttgagtggcgtatcaatcgatatatcgcaaagcacgccacgccactggct  
>MITE\_T\_84063  
aACAgtaatagacgctatttagtggcgacgtcatcatagggattctccattatatcgcaattggatccaacaataacattggcataacctctttcaat  
gctaccaatgcgaaaaaatcgataaatatcgcttttctgtgacgttgactaataagcgtctattactttt  
>MITE\_T\_84401  
GAGCGGACTCATCGTTAcaatcgatgttgagacaaatgtcaatcCCTGATCATCTCAAAAgtagcaccactcaac  
aggataatacatgcagtcagatggcaccactgatgagtggtgacctaacaataacttgacttttttctcaacatacagatgagtCCGCTC  
>MITE\_T\_84798  
tggactgcattttgcaatttggacctataaattctggctcatctgaaaaaacacttatgtgcatagggaaactaatggcacatacgttgttttaaacg  
ggccggaatttataggtccaattgcaaaatgcagtccaatattccaaattgcaaaatgcagtcca  
>MITE\_T\_85204  
CTTTCTTTCTATAACGATAACTCAAGGGACCGGCCGATTTCTCTCGCTACAGAGTGACTGG  
CGTTATAACGATAGTCGAAGTTTAATATAGGAAGTTCAAGAGATCGATCAATTTCTCTCGTT  
ACAGAGAGATTCTCGTTATAACGATACCCGTTACAGAGAGAAAG  
>MITE\_T\_85776  
CAGTAGatatcggtaatacgcacatatCAGCTAATACGACGGATTTCTGTTTTCCCCGGCGAAACTCCA  
TAAGTTAATATGACAACGATTAATACGACATATCGGCTAATACGACGAAATCCCGTGACCT  
CTTGAATGTCGTCGTATTAACCGATATTTactg  
>MITE\_T\_85785  
AAGGCCTAGACACACACGGCGATTTATcaccgcgagtgaagacggaagccaatggagagccttgatttcgatgtatc  
gacgtcaatggatgaaatcaaggctctccattggctccgtctttcactcgggcgataaatctccgtgtgtatctaggcctt  
>MITE\_T\_85847  
GAGCttgcgcacgtatgttgagacaaacgtcaaagtaGGTATTGTTTATGTTACCATTACCAAGTGGTGCCA  
CCTGACTACATGTATaaacctgttgagtggtgcaaattcagagctaatacagagattgacgtttgtctcaacatacगतacGCGAG  
CTC  
>MITE\_T\_85955

TTTaactagaactggggaaaggaaagaagagacaaatgtcacatccaaaaattgcaccattcaaccgatatttacatgctaaccaatgggccca  
actgatgattgatgcacccgactgatgtgactttgtctctcttttcttccccagttctaataAA  
>MITE\_T\_86151  
gaactgggggaaagaaaagaagagacaaatatcaaataccaaaaattgcaccattcaacagatatttacatgctaaccaatgggcccaactgatgact  
gatgcacccagactgatgcacccagactgatgtgactttggctctcttcttcttccccagttc  
>MITE\_T\_86300  
aattggacttcattttgcaatttggacctataaattctggctcatctgaaaaaacacttatgggcatagggaaactaatggcacatacgtgtttttaa  
ccgggccagaatttatagttccaaattgcaaatgcagtccaattaaaagtcgaatt  
>MITE\_T\_86328  
TTAACCCATTCCCTTAACAATTAATTTTGCATGCCCGCGCACAGAGCTACTATttaatttctgtaa  
aaagCTGTATTTGGTTTCTTCTTAGTTTTCTGCTTTTCCTGATTATTAGGAGCGAGTTTTTGG  
CCTAATTCTTATTAGTTATAACTAGAAGGATGTTTATATGAATAAATTTGCCTGGATGTTGC  
ACTTTTTCTGCAGTAAGTCAGCTTATGTTAGGgaatttcctgagaaaaaaaaaaaaatgttaaatttaggagaaaa  
atctTATTTATTGTAAGAAAAAGTACATGCAATGAGCCACAAAACCTCCAAAACCTCTTAAA  
ACATATGCTCAAATAAGATCTAAGCACCAATTAGcaccaaaataagaaaaagagcgAAAATAAGCTT  
ACATCTCGTTGTTGTGATTCAATGAtaacaagaaaataaacagAGAGCAAATTTTCGAGGTTATTCcag  
ttttccacatttcaaacTAACAAAATTCCCTATATTCCGGGGAAATTACCGTACAAAACCAATACAGG  
TTGGTCACACTACTTCTAGTTACAACATCTGTCTGATTACGTGGCGCTATCTATCgtgaaaacat  
caaaacacggcAATACGCGTAGCCAAGTTGCATGACGAGTGGGACTCGTCATTTACGTTTTGT  
CCCGGCGCGGCCATGACGAGTCAAGCTCGTCATATTAAGGGAATGGGTAA  
>MITE\_T\_86582  
CTGCTacgctaaggaataacgccgtatgagccactagacgttgccagatttcctgcgataaaaaccCAATTTCCCTTGGAGAAT  
ATtttattgtcaatttttcagatagtgagatgttgcatgtgtgaggaatttgcgatttgactattgattctgatgtaaaagtgcgaaaaacacgcg  
atggtaccactggtttctctgaagtcaactccaagctcaaaaaagctctcaagtgaggcaaaaatggaggggatccacgcctatcctgag  
agtcacactccacatcaaaacaaactctccgtgcaaagatgagcagtagcaggggtgccgtgtttcagttgtagagtcaccaataaaaa  
tggcagccctgtcaatgtattgtccctatctttgcatggagaatttcttgatgtagaggtggactctcaggagatcggtgggatccctccattt  
tggcctcaactgagagctttttgagcttgggaattgatttcagagaaaaccagtggcaccatcggttctcgcgaacttttacatgagaatcaac  
agtcaaactcgaaattcctcacatgcaacatttccattccTTGGACAATattttattgtcaattttcacataattctgttcgcaatttgcct  
aatatatctgaaaattgcaaggaataataacaacttctcctgaaatacatgtttatccggggaaatgtggcaactctgaatgttcataccgcg  
ttttccGTGGCATGGCAG  
>MITE\_T\_87170  
attggacaacattttgcaatttggaaactataaattctagcctgggttaaaaaacaacgtatgtgcgctatgtgccattagttccatagcacataagtgt  
tttccataagagccagaatttacagttccaaattgcaaatgcagttccaat  
>MITE\_T\_87504  
ttaattgaactgcattttgcaatttggagctatataaattctggctcatctgaaaaaacacttatgtgcatagggaaactaatggcacatacgtgtttt  
aaaccggactagaatttatagttccaattgcataatgtagtccaattca  
>MITE\_T\_87533  
tggactacattttgcaatgtggaactataaattctagccccggttaaaaaacaacgtatgtgccattagttccctatgcacacaagtgttttccagagg  
agccagaatttatataTCCaactatagttccaaattgcaaatgcagttcg  
>MITE\_T\_87548  
actggactgcattttgcaatttggaaactataaattctggctcatctgaaaaaacacttatgtgcaattgtgcatagggaaactatggcacatacgttgt  
tttaaacgggctaaaatttatagttccaaattgcaaatgtagtccaat  
>MITE\_T\_88419  
tgaaatggacttcattttgcaattcggaattaTAACTTCCGACCCacctgtaaaagcacttatctgagtagaaaaactaatggtacatac  
gatggttttaactgaggcacaatttatagttccttattgcaaatgcagtccaatca  
>MITE\_T\_88471  
GAACTGGGGAGAAGAAAGGCTGGACAGAAAGTCACATCAAacctgaatgcatcaatcattagtggccattg  
gttagcacATAACTTTCTGCTGAGTGGTGCCATTtttgatgtgacatttgtccaataatcttttcttccccagttc  
>MITE\_T\_88474  
ttaattggactgcattttgcaatttggaaactataaattctggctcttttggaaaaaacacttatgtgcatagagaaactaatggcacatacgtgtttttaa  
ccgggctaaaatttatagttccaaattgcaaatgtagtctaattga  
>MITE\_T\_88630

GAAGTGGGGGAAGAAAAGAATAGACAAATAATGCCACATCAATATGACTGCATCAATCA  
ACGGTTGGCCAttggttaaaaaataaatattatgtGAATGGTGCCATTtctgatgtgacatttctattctttctttccccag  
ctC

>MITE\_T\_88647

gacgctattagtgaacatcacagaaaagcgatatatatcgatttttcgcactggttagcattgaaagagggttatgccaatgttattgtagatcc  
aatcgatataatggagaatctcTATGATGACGttgccactaatagcgtc

>MITE\_T\_88734

tgaattggattacattttgcaaaaaggaaccactatctttggctctccataaaaagcacgtatctgcatagggaaaccaatggcgtgatgtgtttct  
aaaatggggccacaaatagtggttccttatcgaaaatgtaatccaattga

>MITE\_T\_88790

cttactgaaaaaaaaaattgctaaaatacggtgacaaatcaccaaattagtaaaatcaaccgggtgttcttaattctattttgatgagttgtcacctt  
ttttcacgatttcattgtgttatttagcagttttttttcagtgtag

>MITE\_T\_88849

cgggctgtatagacataccgtccatgccgggctcagaggccgaaggTTCCCGGTGCTGTagccgtagcttcaattgtccgggtgct  
actacgccagaactttcggctctgagcccgggaacgcggacggtatgtctatatagcccc

>MITE\_T\_88892

attggactacattttgcaattttattgaaacctataaattctggctcatctgaaaaaacacttatgtgcatagggaaactaatggcacatacgttgttttg  
aaccgggcccgaatttataggtccaaattgcaaaatgcagtccaat

>MITE\_T\_88895

caactggactgcattttgcaatttgacttataaattccggccccggttaaaaaacaacgtatgtgccattagttccctatgcacataagtgttttttca  
gatgagccagaatttacagggtccaaattgcaaaatgcagtccaattg

>MITE\_T\_88924

cagtaagacctggaatTATCGGATCTCGATTTAACAGATCAATCCTCCAGTCCCTTCAGTAGGACC  
GACTAGCGCGCTTTAGCGGATTCCGCAATTTAAAAGATTTGGCCTCCGATCCCATGAAAT  
CCGAataatcgaggtcttactg

>MITE\_T\_88933

CAGTAAGGCCTCAATTTATCAGGTTTCACAGGACTGGGGGCCAAATCCGTAAATCGCG  
AAATCCACTAAATCGTGCTAGTCGGTCCTGCTGAAGGGACCGGAGGATCGATCCGTAA  
ATCGCGATCCGATAattcgaggtcttactg

>MITE\_T\_89219

GAGTCCAAGCCAactaagtttacgcacttttagactgcgacagaagatccgccatcttcttctgcatttactGCACATGTAA  
AGGTGACGTTAGACGATCTTCTGTGGCAGTCGAGAAATGAGTAAACTTATTCTGCGAGG  
ACTC

>MITE\_T\_89737

tggattacattttgcaaaaaggaaccactatctctggctttcATGAGAGGTCgtgaaagcacatatctgcatagggaaaccaatggcatg  
catgttgtttctaaaatggggccagtaatagtggtccatatcgaaaatttaacca

>MITE\_T\_90022

aattggactgcattttgcaatttggaacctataaattctggctaatctgaaaaaacacttatgtgcatagggaaactaatggcacatacgttgttttaaaa  
catggccggaatttataggtccaaattgcaaaatgcggtccaatt

>MITE\_T\_90026

cgggctatgtagacataccgtccgttccgggctctgagGCAGAAACCTCCGGATGCTGGAGCCATAGCTTCGA  
TTACTCCCGGtcctacgcccggaactttcggcctcatAGCCCAGaacgcagacggtatgtctgtgTAGCTCG

>MITE\_T\_90125

attggaccacattttgcaataaggtaccactatttctggctcatttttagaaataaaatatgtgccactgggttccttatgcagataggtgcttttggtga  
ggagccagagatagtgatactcttattgcaaaatgtaatcccat

>MITE\_T\_90281

attggactgcattttgcaatttggaactataaattctggctcttctggaaaaaacacttatgtgcatagggaaactaatggcacatacgttgttttaaa  
gcgggctagaatttatggttctacattgcaaaatgtagtccaat

>MITE\_T\_90289

attggactgcattttgcaatttggaactataaattctggctcatttgaaaaaacacttatgtgtatagggaaactaatggcacatacgttgttttaaac  
tgggcccgaatctatagttccaaattgcaaaatgcagtccaat

>MITE\_T\_90305

attggactacatttgcatttggaaactacgaagtctggctcatctgaaaaacacttatgtgcatagggaaactaatggtacatacgttgtttttaa  
ccgggccagaatatagttccaaattgcaaaatgcagtccaat  
>MITE\_T\_90334  
attggactacatttgcatttggacctatagattctagcccgggtttaaaaacaacgtatatgccattagttccctatgcacataagtgttttccagaa  
gagccagaatttatagttccaaattgcaaaatgcagtccaat  
>MITE\_T\_90402  
attggactacatttgcatttggaaactataaattctagcccgattttaaaaacaacgtatgtgctattagttccctatgcacataaatgttttccagatg  
agccagaatttatagttccaaattgcaaaatgcagtccaat  
>MITE\_T\_90409  
attggactgcatttgcatttggaaactaaaaattctggctcatctgaaaaacactcataagcatagggaaactaatggcacatacgttgtttttaa  
cagggctagaatttatagttccaaattgcaaaatgtagtccaat  
>MITE\_T\_90431  
attggactgcatttgcatttggacctataaattctgactcatctaaaaaaacacttatgtgcatagggaaactaatggcacatacgttcttttaagt  
gggccggaatttatagttccaaattgcaaaatgaagtccaat  
>MITE\_T\_90435  
attggaccacatttgcatttaggaactataaattccagctcaattgaaaacaacgtaagtccatcagtttcctatgcacgtgagtgttttacaga  
tgagccagaaatttatagttccgaattgcaaaatgtagtccaat  
>MITE\_T\_90450  
attggacttcatttgcatttgaactataaattctagcccgggtttaaaaacaacgtatgtgccattggttccctatgcacatacgtgtttttcagatg  
agccagaatttatagttccaaattgcaaaatgcagtccaat  
>MITE\_T\_90469  
attggactgcatttgcatttggagctgtaaattctggctcatctgaaaaacacttatgtgcatagggaaactaatggcacatacgttgttttcaa  
ccgggccagaatttatagttccaaattgcaaaatgcagtccaat  
>MITE\_T\_90473  
attggactgcatttgcatttgaactataaatttctgactcttagaaaaacacttatgtgcatagggagactgatggcacatacgttgtttataaacc  
gggctagaatttatagttccaaattgcaaaatgtagtccaat  
>MITE\_T\_90476  
attggattacatttgcataaaggaaccactatcttgggtctccataaaagcacgtatctgtaTAGGGGAACCAATAATATGTAT  
GTTCTGTCTAAAataggccagaaatagtggttcctattgcaaaatgtaaccgat  
>MITE\_T\_90481  
attggacttaatttgcgattaggaactataattctggctcatttgaaaaagcacgtatgtgcataaggaaattaatggttcatacgttgttttatactg  
agtcagaatttatagttcctaattgcaaaatgtagtccaat  
>MITE\_T\_90503  
attggattacatttgcataaagaaccactatccCTGGCTCTCTcacaaaagcacatatctgcatagggaaaccaacggcatgtatgtg  
ttttaaactgggccagaaatactgggttcctattgcaaaatgagatCCAAT  
>MITE\_T\_90515  
attggactgcatttgcatttggaaactataaattctggctcttctggaaaaacacttatgtgcgtagggaaactaatggcacatacgttgtttataaac  
cgggccagaatttatagttccaaattgcaaaatgtagtccaat  
>MITE\_T\_90558  
actggactacattttacaaaaaggaatcacaatatctggctcatagataaaaaacacctatctgcatagggaaactaatgacacgtgtgtgttttaa  
aatgaggcaggaattgtagttcctaattgctaattgtagtccaat  
>MITE\_T\_90561  
attggactacatttgcatttggaaactataaattctagcccgggtttaaaaacaacgtatgtgccattagttcgctatgcacataagtgttttccagaa  
gagccaaaatttataggtccaaattacaaatgcagtccaat  
>MITE\_T\_90564  
attggaccacatttgcatttcgaaacCATAATTCATGgcccatctgaaaaacacctatgtacatagggaaactaatggttcatacgttgt  
ttctcaactgagccagaaattaaagcttcaaaatgcaaaatgcagtccaat  
>MITE\_T\_90612  
attggactgcatttgcatttggaaactatagattctggcccgggtttaaaaacaacgtatgtgtcattggttccctatgcacatgagtgtttctcagat  
gagccagaattcatagttccaaatttcaaaatgcagtccaat  
>MITE\_T\_90622

attggattacattttgcaataaggaactactgtCTCCGGCTCTCCcttaaaagcacatatctgtataaggaaaccaatagcatgtatgtgt  
ttttaaattgggccagaaatagtggttctttattgcaaaatgtaatccaat  
>MITE\_T\_90630  
gttggattacattttgcaataaggaaccactatctctggctcttctgcaaaagcacctttctgcacgCGGAGACCAATGGCATAcata  
ttgttctgaaatgagccaggaatagtagttccttattgcaaaatgtggtccagc  
>MITE\_T\_90635  
gcctgtgtcacactatcaaaatactccatcaaaactTCAAGGTCAAGTGATGTGATTGGACCAAGTCATCggataa  
gccaatcacaacacctgaccttgatattttgatggctagcttagATAGTGTGACACTGACACAGGC  
>MITE\_T\_90655  
attggactgcattttgcaatttgaactataaattctggcccggttataaaacaacgtggtgccattagttccgtatgcacataagtgtttttcagatg  
agccagaatttatagttccaaattgcaaaatgcagtccaat  
>MITE\_T\_90707  
cacacggcgattaatcgccgtgCGATTGAAAGACCagagccaatggagagccttgatttcgatttatcgacgtcagtggtatcgaa  
atcaaggctctccattggcttctgctttcaatcgccggcgattgatcgccgtgtg  
>MITE\_T\_90727  
tggaaccacattttgcaataaaggaaccactaattctggctcattttagaaacagcatatatgccattatttccctaggcagaaagggtgctttataca  
gaagagccagagatagcgggtgccttatcgcaaaatgcaatcca  
>MITE\_T\_90777  
attggactgcattttgcaatttggacctataaattctggctcatctgaaaaaacgtatgtgcatagggaaactaatggcacatacgtgttttaacc  
gggttagaatttacagttccaaattgcaaaatgcagtccaat  
>MITE\_T\_90788  
attggaccgcattttgcaattaggaactataaattctggctcatccgtaaaacaccttatgttcataGGGTACTGACAGCAAttacgtcgtt  
tctaaactgtGAGATATtatggttcttaattgcgaaatgcgGTTAAAT  
>MITE\_T\_90791  
ttagcctgtgtcacactatcaaaatactccatcaaaatatcaagctCAGGTGTTgcgattggcttattcgatgacttgaatcaatcacagcact  
tgacctgacattttgatggagcattttgatagtgtagacacaggctta  
>MITE\_T\_91344  
attggactgcattttcaatttgaactataaattctggctcttctggaaaaacacttacgtacatagggaaactaatgacacatacgttttaaccgg  
gctaaaatttatagttccaaattgcaaaatgtagtccaat  
>MITE\_T\_92700  
tggattacattttgcaataaggaagcactatttccggctcattttagaacaacacatatgccattgggttccccataCAGAAacgtgctttatga  
aagagccagacttagtggtccttaatgaaaaatataatcca  
>MITE\_T\_93012  
tggattgcattttgagtaaggaaccactatttctggttcattttagaacaaaatacgtgtcattgggttctctatgcagatatgtgctttatgagaga  
gccagagatagtggtcccttattgcaaaatgtaatcca  
>MITE\_T\_93070  
ctctgcagcctgattgtgaaatttatgtcggcagcagaagaatcgaaaatcgatacattacacgatgcagatagggctatgtctgtcttatcgtgc  
cgacatagccagttaaagttcaacaatccgcgGCTGCAGG  
>MITE\_T\_93545  
gacaattggacgtatttctgccaacggaactatgtgcattaaggcatgagccctgagaccataagaacatttatgcataacagggcttatgtcat  
aatgcacatagttccgtttggcagaaatacgtccattttc  
>MITE\_T\_93860  
AAGGTtcggttacacgatcaaattgagccatcaaactgaagctctgattggtgaaaaagacctgaggtgaggatgcgacctgcgaccaat  
gagaggccgaATTTGATAGCTCactttgatcgtgtaactggacctt  
>MITE\_T\_93959  
gcaattgaacgtatttctgcaaacggaacctgtgcatcacgacgtgagccctgttatgcatgtattcttatgggtctcagggctcatatcttaatgc  
acattgtccgtttgatagaaatacgtccaattcgac  
>MITE\_T\_93962  
ATatatcgtcgcctacctgacataagggcgtaactacactctgcaatgaaccctgtcttccgtacatttcaatgcttttccgggctcatctcaatgag  
tagttacgcccttatgtcagcaaAGCGACGATATCATG  
>MITE\_T\_94367

ttgcagcaatattgcagcaatattgcagcaatattgtcaatattgaaacaatattgtcatgtaaatatttccttaaatactgcagaaatattgtgacaa  
tattgctaaaatatttcatgacaatattgtaacaa  
>MITE\_T\_94516  
tcaattggacgcatttctgccaacggaactatgtgcattaagacatgaaccttgagaccataaaaatacatgcataccagggctaacgtcataa  
tgcacatagttccgtttgacagaaatgcgtcaTTTGGA  
>MITE\_T\_94576  
ataattggacgtattgctgccaacggaactatgtgcattgaaacatgagccctgagaccattagaatatagacataacagggctcacgtcataa  
tgcacatagttccgtttgtagaaatacgtccaattaat  
>MITE\_T\_94621  
tcaattggacgtatttctgtcaaacggaactatgtgtattaagacgtgagccctgaaaccataagaatatatgcataacagggctcacgtcataat  
gcacatagttctgtttgatagaaatacgtccaattta  
>MITE\_T\_94703  
tcgtcgctcctctgacgtaagggcgatatctcgattctgacatgagccctgggaaaCATGgtgttatatggacaacagggtagAAATCGA  
AGAAATcagaaaatcgagatacgcccttacgtcagagggggcgacga  
>MITE\_T\_94810  
attggcgctatttctatcaaacagaactatataggtgcatcatgacgtgagccctgttatgcgtgtgtattcttatgggtctcagggcttatgtctta  
gcacatagttccgtttgacagaaatacgtccaat  
>MITE\_T\_94816  
ccaattggacgtatttctatcaaatggaactatgtgcattatgacttgagccctgttacgcatatattcttatgggtctcagggctcatgacttaattcac  
atagttctgtttgtagaaatacgtccaattg  
>MITE\_T\_94826  
cattttgcagtaaggaaccactacatatttctggccattctttgaaacaacatacatgctattggcttcctatgcagatatacctatgctttatggga  
gagccagagatagtggttctttattgcaaaatg  
>MITE\_T\_94838  
tcattgaacgtatttctgccaaaaggaactatgtgcattaagacatgagcttgagatcataagaatacatgcataacagggctcacgtcataatgc  
acgtagttccgtttgacagaaatacgtccattga  
>MITE\_T\_94845  
ctaattggacgtatttccgtcaaacggaactatgtgcattaagacatgagccctgagaccataagaatatatgcattacagggctcacgtcaca  
cgacacatagttccgtttgtagaaatacgtccgattg  
>MITE\_T\_94893  
CTTTCTCTCTGTAGCGAAAACCTCAAGAGACTGGCCGATTTCCTTGATACAGAGAGACTC  
TCGTCATAACAATAGTGGATATTTAATATAGGAAGTTCAAGGAGCCGACGAATTCCTCG  
TTACAGAGAGAAAAG  
>MITE\_T\_94909  
acaattggacgtatttctgccaacggaactatgtgcattaagacaagagccctgataccataagaatatgtgcataacagggctcacgtcata  
atgcacatagttccgtttgacagaaatacgtccaatt  
>MITE\_T\_95482  
cagtaagacctcgaatTTTTGAATCGCGATTAAACGGATCGATCCTCCGGTCTCTTCAGCAGGACC  
CACTAGCGCGTTTGAACGGATTTCGGCCTCCGGTCCCGTGAAATCCGATAAATCAAGGTC  
TACTG  
>MITE\_T\_95637  
aatttgacgtatttgtccaaatggaactatgtgcatcatgacgtgagccctgttatgcatatattcttaagggtttcagggctcatgtcttaatgcaca  
tagttccgtttgacagaaatacgtccaatt  
>MITE\_T\_95975  
attgaacgtatttctatcaaacggaactatatgtgcattaagacatgagccctggtagCCACaagagtatatgcataacagggctcacgtcataa  
tgcacatagttccgtttgacagaaatgcgtccaat  
>MITE\_T\_95992  
aatggacgtatttctatcaaacggaacatgtgcattatgatgtgagccctgttatgcacatactcttatgagtctcagggctcatgtcttaatgcaca  
tagttccgtttgatagaaatacgtccaatt  
>MITE\_T\_96006  
aattggacgtatttctaccaaacagaactatgtgcattatgacatgagccctattatgcatgtattttatgggtctcagggctcatgtcttaatgcacat  
ggttctgtttgataggaatacgtccaatt

>MITE\_T\_96323

tactgccgtgttagcgaagagagcagtaaattcattttgtatgagccatagttagcacatgcttttatgtgtctcgagggtcatcccgCATGC  
ACGTACTggctgctctcttcgctatcacggcagaa

>MITE\_T\_96516

attggacgtatttctgtcaaacggaactatgtgcattaagagatgagccctgagaccataagaatatgcataacggggctcacgtcatgatgc  
acatagttccgtttgacagaaatacgtccaat

>MITE\_T\_96542

attcgtcgctacctgacaaaaggcgtaactccattctgcaatgagccctgtcttcatacaattcaatgctttccgggctcatctcgatGTG  
AGTCACGCCTTGATGCCAGGGAGGCGACGAAT

>MITE\_T\_96547

ATTgaacgtatctctgcaaacggaactatgtgcattaagacgtgagccctgagaccaatacgaatgtatgcataatagggtcacgtcataat  
gcacttagttctgtttggcagaaatacgtccaat

>MITE\_T\_96591

attggacgcatttctatcatacggaactatgtgcattatgactagagccctgttatgcacacatgcctatgggtctcagggtcatgtcttaatgcaca  
tagttccgtttgacagaaatacgtccaat

>MITE\_T\_96594

attggacgtatttctgtcaaacggaactatgtgcatcatgacgtgagccctgttacgcacataattcttatgggtctcagggtcatgtcttaatgcaca  
tagttccgtttgatagaaatacgtccaat

>MITE\_T\_96675

attggacgtatctctgcaaacggaactatgtacattaagacatgagccctgagaccacagaatgtATGctcaacagggtcacgtcataat  
gcataaaGTTTTGTTTggctgaaatacgtccaat

>MITE\_T\_96700

attcgtcgcttggtgacataaaggcataactacacattgagatgagcccggaaaagcattgaaacgtatagaggacagggttcattgcatagcg  
cagttacgcccttatgtcaggtagacGACgaat

>MITE\_T\_96713

attggacgtatttctgcaaacggaactatgtgcattaagacatgagccctgagaccataagaatatgcataacagggtcgaatgcataatgc  
acatagttccgtttgatagaaatacgtccaat

>MITE\_T\_96960

attggacgtatttctgtcaaacggaactatgtgcattatgacgtgagccctgttatacatgtattcttatgggtctcagggtcatgtctaaatgcacat  
agttccgtttgtagaaatacgtccaat

>MITE\_T\_97015

attggacgtatttctatcaaacggaactatgtgcattaagacatgagccctgagactcataagaatatacgcataacagggtcacgtcataatgca  
catagttccgtttgacagaaatacgtccaat

>MITE\_T\_97133

attggacgtatttcttcaaacggaactatgtgcgttaagacatgagctctgagaaccataagaatacatgcataaccagggttcacgccataatgca  
catagttccgtttgacagaaatgctccaat

>MITE\_T\_97136

ATTCGTCGcttacctgacataagggcgaaactacactctgcaatgagccctgtcttcatacaattcaatgctttccgggcttaCCTCA  
ACGTGTAGTTAacccttatgtcagccaagcgacgaat

>MITE\_T\_97146

attagacgtatttctgcgaaacggaactatgtgcattaagacacgagccctgagaccataagaatatatgcatgacagggtcacgtcataatgc  
acacagttccgtttgacagaaatacgtccaat

>MITE\_T\_97177

cattttgcaatataaggaaccactatttctgggtcattttagaacaacatatgtgccattgatttccctatgaatatacgtgctttatggatgagccag  
agtttagtggttccttattgcaaaatg

>MITE\_T\_97192

cctgcggggccgattattgaaatttaaaccagcccagataagacatcgaattgcgatatttgcatggtaagatagggtcatgtctgtcgtgtcggg  
ctgacatagttcaataatcgggccgcagg

>MITE\_T\_97369

cattttgcaatataaggaaccactagctcTGGCACTTCacaaaagcacctttctgcttAGGGAAATCAATatcatatatgttgttt  
ctaaaatgagccagaaataatgggtccttttgcaaaatg

>MITE\_T\_97534

attagacgtatttctgccgaacggaactatgtgcaatatgacgtgatCCCTGTTATGAATATATATATGGGTCTcacggctca  
tgtcttaatgcacatagttccgtttggcagaaatacgtccaat  
>MITE\_T\_97636  
TCGTGCGCCCATCTGACGGAAGGGCGTATCTTGGTTCCCACTattgagccctgtttacataaaatccatgctt  
tctgggtctcatgcaaaaatcgagatacgccgttacgtcagaggagcgacga  
>MITE\_T\_97694  
tgttgagacaaatgtcaatctctgattacCTCTGAATCAGCACCTCTTAATcaggttaatacatgcagtcagatAGCACC  
ACTGATGAGAGGTGACCTAAACAATACTTGACTTTTCGTCTCAACA  
>MITE\_T\_97876  
attggacgcatttctgccaaacggaactatgtgcaagacatgagccctgggacccataagaatgcatgcataacagggctcacgtcataatgca  
cttagttccgtttggcagaaatgcatcCAAT  
>MITE\_T\_98616  
tcgtcgctcctctgacgtaagggcgatatctcaattctcgcatgagccccagaaagcaggggcttatatgtgaaacagggctcacttggaattga  
gatacccCCTTACATCACAGGGGCGACGA  
>MITE\_T\_98841  
tcgtcgctcctctgacataagggcgatatctcactCTCTATGTGAGCCCCGTTTTACATATGAACCCATACTTTC  
TGGGACCCATGcaaaaatcgaggtacgcccttacgtcagaggagcgacga  
>MITE\_T\_98970  
TCGtcaccctctgacgtaagggcgatatctcaattccacgtgagccttgtttcacataaaatccatgcttcatggggctcatgtgaaaattgag  
atacgctcttaagTCAGAAGAGCTACGA  
>MITE\_T\_99106  
TCGTGcgttctctaacgtaagggcgtaacctcgatttccgcatgagcttCAAAGAGCGTAcagttatacggagcacagagctcacgt  
ggaaattgagatacgcccttacgtaaGAGGGACGAGGA  
>MITE\_T\_99877  
TCGTGCGTTCTCTAACGTAAAAGCGTATCTCTATTACTACATGAGCCTTGAAAAACGTGG  
AGTTATGTGGggaatagggctcacgtggaaattgagatacgcccttacgtcagaggagcgacga  
>MITE\_T\_99882  
tcgtcgcttggtgacataagggcgtaattacacattgagatgagcccggaaaagcattgaattgatggaaaaTATGGTTCATCGCA  
GAgtttagttacgcccttatgtcaagTAGGCGACGA  
>MITE\_T\_100442  
tcgtcgcttctgacaaaaaggcgtaactacgcactgagatgagcccggaaaagtttaaattgtaCGGgcaacaggggtcattgcaaaatt  
agttacgcccttatgtcaggagggtgACAA  
>MITE\_T\_100643  
tggacgtatttctgccaaacagaactatgtgtattatgacgtgagccctgatatgcatatattcttatgggtctcagggctcatgtcttaatgcatgtag  
ttctgtttggcagaaatacgttca  
>MITE\_T\_100649  
tggacgtattttgccaaacggaactatgtgcattaagccatgagccccgatacccataagaatacatgcataacagggctcacgtcataatgcac  
atagttccgtttggcagaaatacgtcca  
>MITE\_T\_100670  
GACGTACgccccgcgttccgggctcagaggccgaaagttccgagcgtagcaccggagtagtcaaagctacggctccagtatcaggaa  
ctttcggttctgagcccgggaacggacgggtatgtc  
>MITE\_T\_100680  
cgggctatatagacgtaccgtccctGTTCCGGGCACAGCaaccggagcaatcgaagctacgactccggaacccggaaactttcggc  
ctctgagcccgggaacggacgggtatgtctatacagcccg  
>MITE\_T\_101401  
ATAAGTTTACTCACTTTTTaactgcgacagaagattgtctgacgtcacttttacatgtaaagtaattgcaagaatcaagatggcgg  
acctTCTgccgcagtctaaaagtgcgttaACTTAT  
>MITE\_T\_101800  
tttctgccaaacggaactatgcggattaagccatgagccccgagaccgttgagaccataagaatatgtgcataacagggctcacgtcataatgc  
acatagttccgttttagcagaaa  
>MITE\_T\_101803



CCagctcctcgattgtgaatcgatatcgaatgaccttgatcgatattAACGTTggtaagatagggatttatcgatcagaagcattcgataac  
gattcaacaatcgacccgctgg  
>MITE\_T\_101877  
gagtccctttataccagagttacgacaactcacttttgggtgggcccaggattgggctgaaagtggcctaaaaaaaaatccaattctgattgggtctc  
gctcatggaggccgaaactagtgaccaagatggcggtacctcgatgtgaacaagaataatgaaaatattacctaattgtggtttatcaagagta  
aattgttattgccatcgggtccaaaatgaaaatagattaagaaattattcacaacaaatctcattttcttttaattgatcaattgttgatgtgtgtttg  
tgtgacagacatcgaggattcctgatccttatccccaatatcgttcgtttgagtgcactagtttcggcctccatggccagccaaggctgggtacc  
agtcagctgataatcgagttgtcgttactctgggtataaagggactctaaaatgagattggtttgtgaataatttctaattctatttcattttggaccgat  
ggaaataacaatttacttttgataaaccacaattaggtaatattttcattattctgttcacatacgaggtaaccgccatcttggtgcactcgttcggcct  
ccatgagcgagaaccaatcagaattggatttttttaggccactttcagcccaaccctggcccaaccaaagtgagttgtcgttaactctgggtata  
aagggactc  
>MITE\_T\_101959  
tcgattgatctgccgttttaaaccatggaaaaggatcgatagacaggggtgttcgcaacgaacaccttgataatcgattctttatcatagctttaaatg  
ggggaaatatcga  
>MITE\_T\_101968  
tcgattgatctgccatttgaacctatggaaaaggatcgatagactgggtgttcgcaacgaacaccttaataatcgattctttaccataggtttaaatgg  
cagaacaatcga  
>MITE\_T\_101988  
tcgattgatctgccatttaaaccatggaaaaggatcgataaacaaggcgctctcaacgaacaccttaaaaatcgattctttaccatagcttcaaag  
ggaaaaaatcga  
>MITE\_T\_102071  
tcgatatctgccatttgaagctatggtaaagaatcgatcattaaggtgttcgctgcgaacaccctgtttatcgatcctttccataggtttaaatggca  
gatcattcga  
>MITE\_T\_102104  
tagcTGCGTTGCTAAGTCTCCGGAGGGCTCTCCGGAGTTACACGGAGACGTAAACAACCG  
TTGTTCTGACTCCGGAGGCATTACCCGGAGACTTGCTACGTCATgctca  
>MITE\_T\_102114  
tttaaatcaaaagaaattatatccattttgacatgagctttgtcatgcatgtattttatggatcttagggctcatgtcagaatgtatatagttcctttgattt  
aaa  
>MITE\_T\_102346  
aatcaaaaggaactatatccatctCGACATGAGCCctatcatgcatgtattcttatggatatcagggctcattttagaatggatacagttcct  
tttgatt  
>MITE\_T\_102358  
gcgaagagaggagtaagtggatttctgtatgagccatgatcagcacatgctttatgcgtctcgaggctcatcccagcatgcacttagtGCTCT  
CTTCGC  
>MITE\_T\_102458  
tcaaacggaactatgtgcactaagacatgagccctgagaccataagaatacgtgcataacagggctcacgtcataatgcacatagttccgtttg  
a  
>MITE\_T\_102741  
agggcgtatctctatctttcctcatgagccccgaaagcataaaGTTAtgcggagaacagggctcacgcgaaaattgagatacgcctt  
>MITE\_T\_102821  
agggcgtatatcgatttccgcatgagccccagaaagcatggacttATATATAAAACAAGGCTCGCgttgaaattaagatacgcct  
ct  
>MITE\_T\_102832  
CATagggacgtatttatgttaaaaggaactatgtgaatagGGATTGcatgcgacatagttccttttagcataaatacgtccatagg  
>MITE\_T\_102864  
agggcgtgtcTAGATTTCggcatgagccccagaaagcatggatttatatttaAGACAGACCTCaagaggaaattgagatacgcct  
ct  
>MITE\_T\_103160  
cagtaagacctcgaatTATCGGGTCGCGATTAAACGGATTTCGGCCTCCGGTCCTGTGAAATCCGAT  
AAATCAAGGTCTTACTG  
>MITE\_T\_103226

attggacgtatatatgctgaaaggaactatggtacacgcaaactctatgcacatagttccttttagcataaatacgtccaat  
>MITE\_T\_103229  
gttgacgtatttatgccaaaagtaactatgtgcagaggggttgctgtaacgtagtttcttttagcataaatacgttcagc  
>MITE\_T\_103232  
ATgtacgtatttatgcgaaaaggaactatgtgcacacaaactctatgcacatagttccttttagcataaatacatccaat  
>MITE\_T\_103235  
attgtatttttatgctaaaaggaactttgtgcatagggattgcatgcaacgtagttccttttagcataaatacgtccaat  
>MITE\_T\_103339  
attggacgtgtttatgctaaaaggaactatgttacacgcaaactcctttgcacatagttccttttgccataaataagtccaat  
>MITE\_T\_103345  
gttgacgtatttatgctaaaaggaactatgtcacacgaaAACCTacgtacatagttccttttagcataaatgctgccgaT  
>MITE\_T\_103449  
ttggacgtatttatgctgaaaggaactatgtgcataggggttgctggaagatagttccttttgccagcaATACGTTCA  
>MITE\_T\_103555  
cgaacatatttatgctaaaaggaactgtgttaCACGCAactctatgcacatagttccttttagcataaatacgtcca  
>MITE\_T\_103731  
CGGAactatttatgctgaaagaaactatgtgcatgctaaccctatgcacatagttccttttagcataaatacgtttg  
>MITE\_T\_103800  
TGggcatatttatgctaaaaggaactatgtgcataggggttgcatgtaacatgggtcctttaagcataaataatgtcca  
>MITE\_T\_104134  
tgtacattaagacatgagccctgagacctataagaatacatgcatatcagggtcacgtcataatgcaca  
>MITE\_T\_104140  
tgtgcattaagacatgagccctgagaccataaaaaatacatgcataacagggtcacgtcataatgcaca  
>MITE\_T\_104143  
tctcaatttcacgtgagccctattttacataaaatccatactTTCTAAGGAtcatgcggaattgaga  
>MITE\_T\_104470  
cagtaaaagctcgttaagacgaaatacgggttaagacgaaaatccgcttaagacgaaatttgTTCGGTCCCTCGACACTtccataa  
gagtcaatgtaaaaaaatacggataagacgaaatttcgaaatttgacccgTAACCAAAGCCGGTCAAGACGAaggaaaa  
ttccgatttttccctgaaattgggttaaaacgacaaaaaGGAGCCAATTCTTGGGGAAAATAAACTTAGTTTT  
ACGTACCTTGACATAAAAAGAGTAGGTTGAGAGTAGATCGGGGGTATCCTCTGTTTTGCT  
GGATGACTGTGATGCAATCGACAGTTGACGATAAACCGAAttgcgtattttaaaaaaattcaaaatttgatttc  
gcattgtataaaatttaaaattcaaaactgatAGTTAATAATCTTTCAAAAAGTCATTCACTTaaaataatcttaatttta  
gtttgtGTGGATTTTGAAAGCTGTCCGGATATTGAAACTGCTTTCAAATTTTGAGGCTGTTG  
AAAGCTGTATCGTCCACGTCATTTTGAAGTGAAGAACGTCCTAAGTTTGTGCGCAGTTGC  
CGCTTATGCCGAAAAAGTTTCGTCTTAAGCGGAgaacgggttaagacgaaaagccgcttatgacgaaatttttaggt  
cccttcatttttcgtttCAACAAGCTTTTACTG  
>MITE\_T\_104519  
tcgaatgatcctgatcgatatatccctatcttagcaatgcttttatcgatcaaggtcattcga  
>MITE\_T\_104556  
tcgaatgaccttgatcgatagaaagcattgctaagatagggttatcgatcaggatcattcga  
>MITE\_T\_104582  
tttatgctaaaaggaactatgttacacgcaaaccctatgcacataggtccttATAGCATAAA  
>MITE\_T\_104586  
tttatgctgaaaggaactatgtgcataggggttgctgtaacatagttccttttggaagaA  
>MITE\_T\_104589  
tttatgctaaaaggaactatgtgcaCGCAACcccaatgcacatagtccttttagcataGA  
>MITE\_T\_104592  
tttatgctaaaaagaacctatgtgcatagagtttgctgtaacatagttccttttagcataaa  
>MITE\_T\_104596  
cttttgctaaaaggaactatgtgcataggggttgctgtaacatagttcctttaacataac  
>MITE\_T\_104600  
tttgtgctaaaaggaactaagtgcataaggggttgctgtaacacagttccttttagcataaa

>MITE\_T\_104630  
actcgtgagccgttgGCATGTTAcgaagagccttgtggacagggagggtcatgagt  
>MITE\_T\_104695  
tgctaaaaggaaccatacACGTGGGGtttacgtgcaacatagttccttttagca  
>MITE\_T\_104698  
tgctaaaaggagctatgtgcataggggtgcgctgacatagttccttttagca  
>MITE\_T\_104712  
tgctaaaaagaactatcttatacgcacaaacctatgcacatagttccttttagca  
>MITE\_T\_104715  
tgctaaaaggaactatgtgcatagggattgtgtgcaacatagttccttttagca  
>MITE\_T\_104722  
atgatcgattatcgatattccctatttgaagccttggtaaagaatcgattat  
>MITE\_T\_104728  
tttaaatatatttaagtgcgtgtttatttagTGCAGCACttcaatattattaa  
>MITE\_T\_104734  
actcatgagccgtaggcatttgacaaaagccttgtggacaggggtcatgagt  
>MITE\_T\_104737  
ACGAGAACTCAAAGGATCGGCCGATATTTTCTCGCCATGGAGAGGTTCTCGT  
>MITE\_T\_104740  
acatcgtctcAATATtatttaaccctagctgcctgggcctctgaaccaacgagaaaagcctgagcgggggtcaatttgacccagctgaaagtc  
aattagttagctatgttttttcatgttttagttaatatcagtgcaactaaccttacaggccttaaccataaagcatatctaagtttataaaacacggcg  
caggggtatgaaccattttatcatacacatgttgccatgtgttctcagcatgagaaaaaaaatcattgtggctactaaatactgaaaacggaaaaa  
atctgaaaaatttgcgtgtttataagtttctgaaaaaattaaaaagagaaaaatgaatacaccttcaaagtaagcttttggatgctaaatggtaaa  
atatatgttataaggatatctgaccccgctcaggccttctaggggtactcgtgaatttttgatctctcatcaTGCAcattccccccccctcctcaa  
tATCGTGTTTCTAGATGtattttagagctatttgtgaaggacaaaaattcgtgcataaccacgagaaaatggcaaaagagttgaaact  
tccgtgggggtcaactcgaacccactcaggcagactaggggttaagcaattttgtttcctaataattaTAGGCAGAAGCCTATGGTCA  
GTGTTTTTTCAATATTGAGGCAATGT  
>MITE\_T\_104756  
aacaatcgattctttaccactgcTCCAAAGGGATAAAGAGTCTCTCGACACGACGTTGTGCCCTGCT  
ATGAATCGATGGATctgccaatggaccactagacaaggtagcaattaaaggattctgatacatgtttcttaaccagaatttcacataga  
acacgattcacactacgaaaattaccgaaatcaacttctaacgaagatatcaacgtttttatttcgcactgatcacgaggaattgaactgcccgtc  
acaagaaactcaaagctctacgtgagtcgaatcgccactacaacgggttcagcaagcttctcaatcgagcaatgttcatttcccaccatgtgtgtt  
caaactattggtaatttgctatagctgagccaaagtgtaagattgaagttttacatcgagagactgtcatgataaacatttagcgcg  
gatgtgaatcacgtagagcattgagtttcatgagcgggtggttgaattcacgcatcaagaatcatcaaatatcttcgtcaggagttgatttggtaa  
tttctgtgtgcgtatcgtgttctacgtgaaatttgggtgagaacatgtatcagaatgctgaaattcgtacctgtctagtgggtccattacacgTAT  
GTGGAAGGATCGATTGTCAGAGTgtcctaataatcgattctt  
>MITE\_T\_104903  
tgtgcatagggaaactcatggcacatacgtgtttcaaaccgggcccagaatttatagttccaaattgcaaaacgcagtcgaatggaccactagac  
aaggtagcaatttaagcgatctgatacatgtttcttaaccagaattttacgtagaaaacgattctcaaaacgaaaattacggaaaccaactcctaac  
gaagatattaacctttttttacattgggttacgaggaatttgaactgcccgtcacaagaaactcaaaactctacgtgagtcgaatcgccactac  
aacgggttcagcaagcttctcaatcgagcaatgttcatttcccatcatgtgtgttcaaaactattagcaatttgctataactgagccaaagcgtaaga  
ttgaggttgccagatttttatatcgacagactgtcatgataacgttttagcgcgcatgtgaatcacgcagagcattgagtttcatgagcgggtggt  
ttgaattcacgcattaagaatcataaataatcttcgtaaggagtttaatttcggtaatttctgtgtgcatcgtgttttacgtaaaatttggtaagaaac  
atgtatcagaatgctgcaattcgtaacctatctagtgggtccattggacgtatttatgctaaaaggaactatgtgtcccGCAAACcctctgcaca  
>MITE\_T\_104936  
catagacataccgtctgttccgggctcagagactgAAActtccgggtgctggagccgtagcatcaatggatcactagacaaggtacgaattta  
agcattccgggtacatgtttcttaacaaaatttcacgtagaacacgattcgcgcaacgaaaattactgaaaccaactcctaacgaagatattaacct  
ttcatttcacattgggttacgaggaatttgaactgcccgtcacaagaaactcaaagctctacgtgagtcgaatcgcgacgacaacgggtctcagca  
agtttcttaacgagcaatattcatttcccaccatgtgtgttcgaactatacgcaatttgcctatagctgagccaaagcgtaagattgaggtgccag  
attttacatcgcgaggagactgtcatgataacgttttagcgcgcatgtgaatcacgtagagcattgagtttcatgagcgggtggttgaattcacg  
catcaagaatcattaaatatcggtgtgaggagttgatttcgataatttcattgtgcgcatcgtgtctacgtgaaatttgggtcacggatcatatatcag

agtgctgaaattcgctaccttgctagtgggtccatttctcaGGGTGCTacttccggaactttcggcctatgagcccggaacgtggacggtaCGTCAATG

>MITE\_T\_105231

ACTGCCTTATacgcaggctcgccacatcccatctcgggcctgtaccagttttaaggcccgGGCCCCCAACCCGGAGGGGGTctgggggctccccgggatattttaaaattttaaatctacttaGACGCATCTTGAAGCTCCCATgacggagattttccatcagtttctgcagaataataATCACGCCTTTTCTTTTACtttttagcaciaaatactttcggatcgttgattcaaacatctgatttttttttggggggggggcagaggatactattttcaattctaggggggtcCAAGCCctcctggactccccttcgtacgtatACGGCAAGAAAGTTGAGTCAttaaagtcgaggatgccagactggaaaCTCTTAGCATCcaacgacggaagaaaaatgaaacgcatattactaaaaatcaatctatgtactaaaaatcttgaaaacagatagaaatctttaagaaagtaagaaaaattctacagtgcccaactgtttctgaaatgtattcaccttttgcgaaatttttaggtacattttcacttttcttgagacaagggttacatgtgaattcgtagtgttttaccagAGGCA CAGGCCCCggaaccagggaaccagtatctcccccccccttatggCGGGCCTGCTTATACGgtagat

>MITE\_T\_105243

ACCCATTCCCTTATTGATTGATGCATGCCCCGTGCACAGATTTACTATTTAATTTCACTGCAAAAAGCTGTATTTGGTTTCATCTTAGTTCTCTGCTTTCCCTGATAATTAGGAGCAAGTTTTTGGCCTAATTCTTATTAGTTATAATTAGTATGATGTTTATATACATAAATTTGCCTGGATGTTGCACTTTTTCTGCAGTGAGTCGGCTTATGTCAGGTGAATTTcctgagagagagagaaaaaaatataaatttaggagaaaaatctatttttggaaaaaaatacttgctACAAGTCAGAAAACCCTAAGAATACCAATGTCAGTAAGAAATAATAGTTGCATTACAACCAAACCGCTTGAAtatggaataaaaaataaatgaagtcaagaaaattgcgtgcaaaattagGTTTAGTTTTGAGGTTATTCCATGCTTTCGCATATTGAAACTAACAAAATTCCCTACATTCAGGGAATTACTGTACAAAACCAGTACAGGTTGGTCACACTACTTCTAGTGACAACATCTGTCGATTTACGTGGCGCTATCTCTCgtgaaaacatcaaaacacggcAATACGCGCAGCCAAGTTGCATGTCTAGTGGGACTTGTCATTTCCCGCTTGGCCCAGTGCGGCCATGACGACTCTCACTCATTATTTTAAGGGAATGGGT

>MITE\_T\_105277

acacagtggcgtggcgtgaatgggcctgttgcaaacctttgctagagcaaaaaataagagttgttctgtagataatgcctcaaaaattacgatgagcgcacatcggaagtctgaaatgcaatcataacttcacaatctgcgtaagaaatttgcgttttttgagcttcccgttcaaaaacgatactacggcacaggatgatcattttgtagaagagtcgctccatcgctcggaatattcctcatggccgacgcttgcgcagttcttcgctgaattcgaggagagttcaaggtcaatcaaggcgggtgaggaaaaatataaacgtaaacacgccgattgttatctggtctaatactgttcaggtgttatctgctccatcacaggattttggcggattgtcgtcgccatgatgggtattgccgacgatggaacgactccttaacaaaatgttcacctgtgccgtagtatcgttttgaagcgggaagctcaaaaaaccgcaatttctacgcagattgtgaagttagaatgcatttcagactttgccaatgcgctcatcgtgattttgaggcaatatctacaagaacaactcttattttgctctagcaaaagtttgcaacaggcccattgcgatatacgcattgttctgtcgtttaacctatggtaaaaaatcgatatgaaggtgttcgctgcgaacacctgcctatcgatcctttccataggtttaaatggcataacaatcgatacatcgcaattcacgccacaacACTGGAT

>MITE\_T\_105454

AAACCCGcccggccgcacagtggatctagtcaatcgggaaggctcgacatgaaattttaactaaaactgaaaatttgatgttaattcgtcacattttaaatttaaggagtGCTACTGAACGAGAAttacacgaggaaaccaatggaaccattttaaacctcaaaagtttgatgacgcactgaaaaaaaatctcgggtgtatttactgagaaaggggtaaaattaccaagaattcagggttctatttgatcccagtttttcttggtaaaattacatttatggaattggtaatttaccggaaatctcggtaaaattattgaacttttttgtaattttactggaccttggtaaaaatgccaatattttttcgactgtggtagaattaccgagataaaatggcaaagttaccgggaattgattaccaataaaaagtggtattctaacGGAaacaatagtaaaaaataccggttttttaggtaagtttacgagctgtcttggtgaaaaattaccaataattggtaaaacaagtgaatggtaaggtatctacggaccttggtaaaaacgccgagaattttttcagtgacagagtataagctttaaagtttccaactttgtccgacctttccattgactcgaaccactgtggaCCGCGGCCGTTTT

>MITE\_T\_105457

gagtcctttataccagagttgaagacaactcacttttggttgggcccagggttgggctgaaagtggcctaaaaaaaatccaattctgattggttctcgtcatggaggccgaaacgagtgcaccaagatggcggtacctcgaatgtgaacaagaataatgaaaatatcacctaattgtggtttatcaagagtaattgttactccatcggtccaaaatgaaaagagattaagaaattattcacaaccaatctcattttcttttaattgatcaattgttgatgtgtgtttgtgtgacagacatcgaggattcctgatccttatccctcaatatcgttcgtttgggtgcactcgtttcggcctccatggccagccaaggccggctgcagtcagctgataatcgagttgtcttaactcgggtataaagggactctagcattCGCTTGCTACAGCTTAGGGtcgcctagagtccctttactgagagtcaagacaattcggctcatggatgtcacaaacgggaataaagattacagaaattgaacgttttcgtgatctttgatcggccattctcaaatgcctttctccgttctcctctcattccgtttgttccttgccgaacccgtaattcctgggtccattccagattataatctttgcaattggtgaaaatgtaattttattcccgtttgtgacactgtggaggcctaaaatacgggaaccaatcagaaatggattcaattgtcttgactctcagtataaaggactc

>MITE\_T\_105574

tgaatattattttctcaaattacagacgggtcactaaacctgtttattttgaatattctgaaagtactatgtgagtagataacgtggtgattttccg  
cattttatggagccgaaatcgcgagaaaaaccgctttgaaaaatctaaaaactgcaagacatttcaaacgcacccgaatggcgggaaactgac  
gggtgtgtagtactgcggtagtcataatcgagTCTTCTCTCATTTccctctgatgtttgttaaataaaacgtatttccatgTGGGATT  
GTTGCTTGTTcattacagctaacatatgaatgagattctagccttgaattcaaaaagatataatttcgacttttagtattgttctcaTATACGA  
AGAGTGGATAGACATTTGACTGACGTCGTGGAACCccttgattggtgccggatgacatcattcggtgcggcgc  
gaaaccggagcgttttaatttgcgtataagttgagcgatttgaactgagcatttctcggtatttgagtaactgttcgcggttttaattgtgcgcatcgt  
ttctatgcgtcattttccttcagaaaaactatattgcaagtcaaaatcgttcatggttttagtgaccattttgtacacatttaaatctaaaatatctgaaaa  
tttcaagaaaaatatgca

>MITE\_T\_105698

CATGCAAAATACATGTTATCAATTACGGAAAACATGAAGgcttttccatttaaattctccgtcacattcacacgg  
cgcaatgatacaactattttaactccccggaatcggtgaggtatcacgccgcatgtgaaggcgtttcaaacagcttagttccgatacccgattat  
cgtttgcatagttcatattctttgttatattccgtaccactcgttatttttaactcctgtagaaaaaccacccatttgctaaatacaatttagctggagc  
gcacttcagctatgcattcactaCTGCAAAATGTCtaaggaaatcgaaaaggccaccgtcatgaaggctatttcaattgtaattctccg  
tcgcatttctaaggcgcaatgatacaactattgaactctccggaatcgagaggtatcatgccgcatttgaaggcgttttcaaatcagccaagttc  
cgatacccaaattatcgtttgcatagttcatattctttgtttccatttctaaccactgtttaagtataatcctctataaaaaaccacccatttgctaaata  
caattctagctgaagcgacttaagcgcatcatgactgcaaaaatgtaaaaggaaatcgacaagcccagcgtgcatggaggctatttccatttaa  
attgcATG

>MITE\_T\_105705

atgggcctgttgcaaaccttttgcaggggcaaaaaataagagttgtttctgttagatgggcctgttgcaaaccttttgcaggagcaaaaaataagagttgt  
tctgttagataatgcctcaaaaatcacgatgagcgcatcggcaaaagtctgaaatgcactcataacttcacaatctgcgtaagaaatttgcgtttttta  
ggcttcccgttcaaaaacgatactacggcgtaggtgaacattttgttagaggagtcgctccatcgtcggcgatattcatcatggccgacgcttgc  
acgcagttccgcgtgaattcaaggagagttcaagggtcaatccattcgggcgttggaataatgaacgttaacacaccgattgttatctggtctaac  
cagttcaggtgttatctcgtcccatcaaacgtgtttggcggattggcgtcggctatgatgattattgccgacgatggaacgactcctcttataaaaat  
gttcacctgtgccgtagatcgttttgaagcgggaagctcaaaaaaccgcaaatcttacgcagattgtgaagttagtgatgcatttcagagtttgc  
cgatgcgctcatcgtgattttgaggcattatctataagaacaactcttagtttgcttagcaaaaagtttgcaacaggcccat

>MITE\_T\_106541

cactgaaaaaaaaaattctcggcggttttaccaggtcagatggtacctttaccatctcacttttattaccaattatttggaattttatcaagacatagac  
tggtgaagcttacctaaaaaccggtatttttactgtttttacaggtgaagaataaccacttttatttggaatcaattcccggtaactttgccattttatctcgg  
aattctaccaccgtcgataaaaaatattggcggtttgaCCAAGgtctggttaaaattaccgagaaagttaataattttacctagattttctcggtaaa  
attaccaattccataaatggaattttacaagaaaaaactgggatcaaatggacggaggttaaacagaaaggaaccaagccacatcgggatcga  
accgagaaaaagaggcttaaggttagctcctgcataagactcaatgtaaaagataaaactcaagttcaatttctgcaaaaatttgcaccaaaaaa  
ctttgatttttggcgAAAGATAGTAGAGCactggttgagttcaaaaccactcataactcaatttttccaaaatgtgggttggttcttct  
gcttaactcagttcaaatagaacctgaattcttggaattttaccctttcctcagtaatacacagagattttttttagt

>MITE\_T\_106854

TGAGTAAgtgacaatgggcctgttgcaaacctttgctagagcaaaaaataaaatttttttacaataatgtctcgaaaatcacgatgagcgca  
tcggcaaaccttgaaatgcctcctaacttcacaatctgcttaagaaatttgcgttttttaagcttccgcgcttcaaaaaggatactatagcacaggt  
gaacacttcgttagaggagtcgttccatgcaatccctgctcaacatggccgacactttcgcgcgcaagttgaggagaggaCGAGGTCAA  
TCAACACGGATATCtatcaaagcgagaaaaatgtgaatgtaaatacgccgattgttatcatgTGTTATAGAGTTATCG  
TCCCGTctcactgtgttttggcggattggcgtcggctatgtgaatattgcgtagtgtACTTGTGAGAAGGGGTTAGATG  
GGATGACttcttaacgaaatgttcacctgtgccgtggtatcgtttgcgaagcgggaagctcgaaaaaacgcaattttttatgcaaTATG  
TGCAGTAAGGAATGACTTTTAGACTtcgccgatgcgctcatcgtgattttgagacactttctatgaggaacaactcttattct  
tgctctagcaaaaagtttgcaacaggccattatacaTTATCAA

>MITE\_T\_106881

aggaaaaacgccgtacagaccttttagacgttgccaaatttctttgataaaacacaaatttctggtaaactcataatatgttccctctaattttcaga  
taattttgatcgcaatggagatgttgcatgtgtgaggtttagctgaggttgcgatttgactgttgaatctaattgtaaaagttcgcaagaaacacga  
tgctgccactggttttctgaaatcaactcccaagctcaaaaaaaccttcaagttgacgccaaaatggaggggatatcccgtcCTACCTT  
gaggggtccacctctacatcaagacaaactctcatgcaagatagggagcaatacattagcagtgatgccgtgttttcagcttttagagtcccaa  
ataaagttggcagccctgtcaatgtatttgcctctatctttgcatggagagtttgccttgatgtatagaCGTGGAccctcagggttaggtggga  
tatcccctccattttggcgtaacttgagagctttttgagcttgggagttgatttcagagaaaaatgagctgtttttgagcttgggagatgaatTCA  
Gagaaaccagtagcaccatcgtgttctcgcgaactttacataagaatcaacggtcaaatcgcaaatcctcacacatgcaacatctccatttcac

ttgaagttcctgaaaatttcgaggaaaaaatgtcataactgcctaaaaaataaacattttatcgaagggaatttggcaactctctaattgttcatacgg  
cgttcttcct

>MITE\_T\_106884

aaagcaaaaaataattcagtggtcattttttgtgagTTGTATTTTCATCTTTTGCTTGTTGTGTCACATAATGTaag  
tacagtagactctggattatccggattgaTCGGTgtcggggcccgatccggatgaaaaagaaatccggataataaacacaaacaccaccaac  
caacaccacagtagttcttattatgtatacatcatgtacataccaacacgaatttaaaagggttaacgccaaactgaacgactcaatgggtattgtgaat  
ggtagccgacacagataaattacaatacaacgattaaagcgcccaatgctggaagtattcatgcagctctgtagccgctaattgtgcgttttaggcta  
actaacgactgcactgcgtttggcgtaatgcgagaagtattatgcaatctagtaggcgctaattgcgttccacgccgacctcactgtttggcgtaa  
tacgtgaagtattctgcagccttgaggcgccaatatgccttgcgaccgcttcccgcgatccgctcactcaTCAGAATGCGCAC  
GTAGTTACAtagttgcaaaatcgatccggataatccagagtcgggataatacgaaccggataatccagagtctactgtagttGAAA  
ATACTGAATTAAGTTTTGGCTTT

>MITE\_T\_107153

gagtcctctatactgggagtttaagacaacacccccctcatggagtcacaaacgggaataaagattacccaaactgaaagttttcgtaattttgat  
cagctcattctcaaattcctttctccgttccttctcattccggtttgttccctgCCGAACCCGTAagtccccgggtccattccagattataatct  
ttgcaattgggtgaaaatgtgatctttatcccgtttatgacactaTGAGAGCttgaaatacgggaaccaatcagaaatggattacataccctca  
gcccccccccccNCCCCATgctttactctcagtataaagggactctatatggaactagagtcctttataccgagagtcaagacaaagc  
gaatccatttctgattgggttaaccgatttttaggccttcacagtgacacaaacgggaataaagattacatgtccaccaattgcaagattataatctg  
gaatagaccgaggaatttcgggttcgacaaggaacaaacgggaatgagagaagggaacgggagaaaggaatttaagaatgagccgatcaaagatt  
acgaaaaacgttcaatttgtgaatctttatcccggtttgtgactccatgaggggtgtgtctttactctcagtgtaaaggacTC

>MITE\_T\_107168

aaaattggcgataagagctgcgtttcaaaataccatgggaattcttatagccggctaagaaggcgacagaaaatcatatagctagctgtagaat  
gcggagaaaatcatatgaccgggctatacgaagcgataaaaaattatgcggccgggctatagttcctatcgccgggctttacattttatgcctg  
gctgttgctttttaccatcgattgtaaaaggctataagaaattgtgtagaattcgtgtgctttggaaatcattaagtttgatacgaaccaccttaata  
ttacaaaacacacattatattctcgtttaatacatattttttccataaattaaaatgagaataatccatacagaatgtgcaaaaatttcaaatcatgag  
ttgaataacgctgactccgccagattaaatattaaaacacacaaagcggagcgacgacgactggcgccctaaaaacctaacagggatacttcac  
gcattgcgcaacgcgtgaagtatccctgttaggtttgtaggcgccaatgcgcgtttcgcgaggctgccccgctgccgcccgcagcgtgcc  
cggcgctattggaaatcttacagccggctgtaggtctatggtattttggaacacagattctactgccaat

>MITE\_T\_107175

ATAGAGGGGCTCAGAAGATatggcgcaaaagtcagttctAGAAATTTCGAGACTAGAGATCAGAGCT  
CAGCCACCTCAGCTGCATGCCATAGCTCGTTATGCTTGTATCTCAACAGGTAAGTTATATG  
AAAACGACTGGACCTCACTTAAAGCACAATACATGAAAACAGGAAGGATAGGCAAAGG  
GGGAACAGAAATCCAGACCACTTCATGTTTTTTCATGTTGAAAGAAGAAGGATGGAAAT  
GAAAGCTAAATCGTGTGCTCAGAAGCatgtctttgatcaaaattgagttgTGC GTTTCTTTTGGTAGTTG  
AAGGTAAGGTCTATGGGAATACCAAGCAATTTTGTCTGGAAGTCATTTGACGCGGAAAA  
AACAGTGAATGGGATAAGTGCATTTTCCGTGTAGAGGGGACGTAGTGTAAGTGCACCC  
ACCATCACCTTAAGCCCAACTGCTATAACCTCAATTTGGCTCAactgtgctgaaaatttcagaagatgTT  
CATGAAGGTGTGAGACAAacgtttgtaattttgaaggtattcAGAACACTCTATGGGTCTGAGTAAAT  
GCAAAACttcaaaactcttttttttttcaaaataataaaaactgcgCTTACCCGCCTtatcttccaagccctcaat

>MITE\_T\_107183

gggtacctgtatagcgagagtagtgacagatcgcttcatggagggcttagggcccaaaagtcagccacccttctaactaACTTCTAAc  
gtacaaaatttcactgccagctctgcagattccaattctaaccatgatggcaaagaatgtacagaaatgagcgttctccgcaaaattgagtaaattta  
tgcaaaaactgagtcaaacacgtgcttaataaacgacgggttcgtaacaatagattagtaaattcgttctggataattgaaattcataggttgctgca  
tttctgggcccctaactttatcgcagaagcatcggtgaaggcctgatggatttccggagtttcacatctgtccatactctcgctatacaggtactcta  
tgaatcacgtagacctagagtagctgtataggaagagtagcgacagatctgaaactccgaaagtccatcaggccttcaccgatgcctccgcgaa  
taaagttagggcccaaaaggcgagccaacctatgaatttcgaatgtccagagcgatttacaatacaattatTACGAatcgctgttagaaag  
catgtatttggttacttttgcataaattacttattttgcgaagaacgctcatttatatacattcttagccatcttggttagaattgaaatctgtaggctg  
gcagtgaaattttgtgtgttagaagttgctcagaagggtggctgcacttttgggcccctaagccctccatgaaccgatctgtcgttctctccctatac  
aggctactc

>MITE\_T\_107194

TggaattatttccgtaaacctcGCGCGCGTTCACGAAACCTCGCGCGTGTTACAAAGAAAGTCGGC  
GCGTGTTGCGCCACTGGCGCGGAGCAATTCCATAGCGCGCGACATAGGTATCGCTGCG  
CGCTGTCAGTATTTCTCCGCGCGAGGTGTAACCTCGACGCGCGGAGAGCAAACCCGCCG

A

>MITE\_T\_107200

CAGTAAAACTTTGATATAACGAATTTCTGGGGACTGGcgaaaaaattgttaaatcgaaAACCGCGGA  
AAACCCGATTATAGgccacaaatTTTTgaaatgttcggTTTTTCTAGTTTCGTGtacaccctccccctcccccttag  
ACTATGACgatattttacggaataatcggtGGGAACACCCATTTAGCTCTTGATCAGTAAAACTGCGG  
AGCGGTAGTGAGGAGCACACGGCAGGGGTTGAAATCGTACTGATGACACTGTTACGT  
AGCTCCTTATTCGGGGTGTTTATTCGAGGAAACATGTGCGCCTCGGAAATTCCCAATCCC  
GCCGTATCGGAAAATGACCTTTGCACCAACACCGAGGTACAAAACGCGGGGTAAAGACA  
AGCATGCTTTCTCCCCCGCAGAGTTGCCGGGCGTGCGGAAATTCCCGTGCATTCGTCAA  
ATTGTGTTTCGATTTACATGGTAAAGTTTGTACTCGGACCGAAGATTTCTTCGTAAAGC  
AAATATTCGTTATGCCGAAATTTCGATAAAtagaatttattttacattgaaaagatAGGGATTTTTTTTggacca  
agaaaaaaattcgtcaATTCGAAGAATTCGTTTTATTGACGTTTCGTCATATCAAAGTTTTACTG

>MITE\_T\_107366

gagtacctgtatagcgagagtatggacagatcgcttcctgaggggcttagggcccaaaagtgcagccacccttctaaccaacttctaacgcaca  
aaatatCACTGCCAGTCTATAGACttcaattctaacgaagatggctgagaaagtacataaatgagcgttcttcacaaaatgagta  
aatttatgaaaaactaagtcaaatacgtgctttataaacgatgggttcgtaacaattgtattaataaatccctctggataattgaaattcataggttggt  
gcatttctggggccctaacttaattcgcggaggcatcgggtgaaggcctgatggatttctggaatttcatactgtctatactctcgctatacaggtaga  
gtaccttatattaagagagtatggccactgggtcccatggagaggcttaggacccaaaaatggcggtgctttgtttgggttttgaggatggaaGG  
GGGgccattgccaaactttgacggttatcaccaaccgcacttgctgccaaccttactacatctaagatcatttttctcaaaaattgcacacgattag  
ccttaaaaatatgtaaaaaagtcgcgatagtgcatttgggttaaagtctcgttacgataagcaaagacaactacattttgaatcattttgcattacatta  
actttaaggcgctccgccattttgggtcctaagggtccattcagcctaagatggctgagctaatacagaggtggttaactccagtggccatactctct  
caatataggctactc

>MITE\_T\_107479

TATTtagaatgggctgttgcaaaccttttgctagagcaaaaataagagttgttactcatggaaagtgcctcaaaaattacgatgagcgcatcagca  
aaatctgaaatgcactccttatttcacaatttgcataagagTTTTGCGTTTTCTGAGCTTCCCACCTCATTAAGGAT  
ACCCcggcacaggtaaacatttcgtcggagtcattccatccaaccctgctcacaaggatactatgcaatattcaacatagccgatgccaatc  
cgccaaaacacatgtgatggGACGATGATttaaccacctgataacaatctgCGTGTtaacattcacatttttctgcattaaaaaatatc  
cgcttgattgacctgtgtTCTCATCAACTTGCGCGCaaaagcgtcggccatgttgagcagggattgaatggaacgacttctcta  
atgaaatgttcatctgtgctgtagtatcctttctgaagcgggaagcttaaaaaaacgcaaattccttttgagattgtgaagtaggagtgcatcag  
agtttgctgaTGCACTCATCAAGAATTTTTGAGACGGTATCTATTAGGGACAACCTCTTATATTG  
CTccggcaaaagtttgcaacaggcccttTAAAA

>MITE\_T\_107708

tgaatatTTTTCTCCAATTTTAAAGGGAATGGACCCTAGACAAGGTACGAATTTAAGCAATCTGATACATGTTCTTAATCAGAATTCATGTAAAACA  
cgattcttacaacgaaaattactgaaaccaactcctaacaagatattaacgTTTTATTTCACATTGGCTACAAGGAATTTGAAGTCCCgcctcaca  
gaaactcagagctctacgtgagTCAATCGCGCactacaacggTTTCAGCAAGCCTCTCAATTGAGCAATGTCATTTCCACCATGTGTTTTCAA  
ctataagctatttgctacagctgagccaaagcgtcaagattgaggttgccagattttatcatcgagagactgtcatgataacgTTTAGCGCGCAT  
gtgaatcacgtagagcattgagTTTTAATGAGCGGGTGGTTGAATTCACACATCAAGAAATCATCAATATCTTAGTAAGGAGTTAATTCGGAAATTT  
ctatgcgcgcacTGTGTTTACGTGAAATTTAGTTAAAAACATGTATCAGAATGCTGAAATTCGTACCTGTCTAGTGGTCCATTTGTcagTATTtga  
tctaaagttcctgaaaatttcaaggaaaaataatca

>MITE\_T\_107776

accctagtctgcctgagtggggtctGATTGACCCGcggggagttcaactctttgccatttctcgtgggatgcacgaaacttttgccttca  
caaatagtctctacaaaaacatctaggaacacgattttgaaggggggggggaagaaaaaatgtgcatgagagatcaaaaattcatgagtacgc  
ctagaaaacctgagcggggctcagatatccttataacatatattttaccatttagcatcacaaaagcctactttgaagggtattcattacttttaatttct  
cttttaatctctttttcatctcttttaattttttcagaaacttataaaacaagcaaaattttcagattttttcgttttcagtatttagtagccctatgattttt  
ttctcatgctgagaacaacatggcaacatgtgtatgataaaatggttcataccctgcgcctgttttttaaaaattagatatgctttatggttaaggc

ctgtaagggttagtgactgatattaacaaaaaacatgaaaaaacatagctaactaattgattttcagctgggggtcaaattgaccccgctcaggcttt  
ctcgttggttcagaggctcaggcagactagggt

>MITE\_T\_107925

aggaaaaacgccgtatgaaccttcaggcgttgccaaatttccctgataaaacacgaatttcctggtaaactgatgaatttttctccgattttcag  
ataatgtgtttgcaatggaccactagacaaggcacgaattcaagcattccgatacatgtttcctaatacagaatttcacgtagaacacaattcgcgca  
acgaaaattactgaaaccaactcctgacgaagatattaaccttttaatttcacattgggtacgcggattttgaactgcccgcctcacaagaaactcaaa  
gctctactgtgagtcaaagcgcgcactacaacagtttcagcaagcctctcaatcgagcactgttcatttcccaccatgtgtgttcaaatgataagca  
atttgctatagccgagccaaagcgtcaaaattgtggttgccagattttcatatcgagagactatcacgATAACattcaacgcgcgatgtgaat  
cacgtagagcattgagttttattgagcgggtggtttgaattcacgcatcaggaatcattaaatatcttcgtaaggagttgatttcgctaattttgtgtg  
cgcatcgtgttctacgtgaaattttggttaaaaaacatgtatcagaatgcttaattcgtacctgtctagtgggccatttcaagtaaagtcctgaaaa  
tttcaaaggaaaaatattcataactttcctgaaaaatgagcattttaacgaaggaaatttggcaactctcgaatgttcatacggcgtgtgtcct

>MITE\_T\_107974

ttttgagacTGGTAGTAGAAAGAGAAGAGGTTTGCTATCATCTCTGCGGTTCGattcaaagacataaag  
acggagcactaaaagcaaaaaatgaagcttctagagcttctttcaatcacctctactattggctagaggattggcggcgaaatcgggacaagttt  
gaattcaaattgtagggcgggaactaataaaaaattgcggaaacaaagtattttagggtgattttgccaaattcaggtacacctcatattttatta  
actttaggttagtttcggctcgtcgaccgactgatttcatttgggagtaacgtagatctagaactgtaacggcctgtttgaactgcagaaccac  
cataagcagaagaaaaactaactttatctgagattactgcctgttaccgagcaaaagtaggtgtaatatattaggacgcagaccgaactttccta  
ataatcgttttaagcatttaaaacacgtttcgaagaagaaataaggaaaaatcaagaggacaagttcaaatcaaatttccgtttgccgcatggattc  
ccgcgctcatttacactcacacaacgcgcagcgcgaacctaagcttctcttttcccggtgcttttagatacagcactccgtctttatgtctttg  
gttcgattgttgatcgaattgaatgaccttgatcgaagaaagGATTGCTAAGGTAGAGATCTATCGATCAAAATta  
ttcgatagcgattcaacaatcgaactGCAGATGTTTTTTAATactaccaatttcaaaaa

>MITE\_T\_107983

attgaggacaccgcaccaagaacagcctataggcatataggctgttattacgcacatctgcttttcggtattctacgtaccctggactatgctgtgtt  
agggatagaatatagataggtaacggctcgaggttgaaaaaccttttttccgagttaagttaggcctctggatcgaagggtgcaagaacgacct  
ataaacgggcctataaggtgtagttaccctttcttactcactatcgatattcttctatttgcgttaatcatcgctgattaaaatgacttatacttcatat  
tgccatcaaaatgactgttgggcgtaataatggcctataaacgcttttttaataaatatattagagtgtaaactctatattatattattataGTG  
TATATAtagtatgtatatatatagtgatatatattagagtgtaaaaatgtatcgcaaaatctacccggcatccttcaatagaagggttaggtca  
cccaaaaacaccaaacagggtagctgcatagaaaagtctgcgcagtacatcaaaaacaaactttaaatgcgtttttctaaaatgcggtttcca  
gttataggctgttcttgggtgcggtgtcctcaat

>MITE\_T\_108053

AACGgtaatagggtcaaatgtccaaaaaaaatgtccataagtcaaatgtccaaacctgaatgccccaaaatttaaaaaggccaaatatca  
gtaatgtccagcagacaaataagtccaaaagtaggcgAATGTCCAAATATGGAAAGAGTAATTATATAGGTACT  
AACTATTTGTTGTTATAGACaagaataactttttttattattattttttatttttgcgtttcatgCCAAACGGGGTAATAT  
TAGCCATGTTTGTATGTTTGTCAATTCacttaaaatttgaaaataaatcataatgcatttttaaaagtaagaattgGCC  
TGCGCTCATAGAAAATTGTATCACCATTTTTTTCTCACCTGCATCTCTCCATTATCCGACG  
CATCTGTTTCTATGGCTGCATTCACGAACAGCTTGCAAAGCTGCACCCAAAACCTCCAATG  
ACAACCTCAACCAATGCCTGATCTCACATTGGACGTTtgccacttttggacttatttgcgtgctggacattactga  
tatttggccttttagatttttgagcatccagggttggacatttggactttggatatttttttggacatttggacctatccccT

>MITE\_T\_108086

GAGTCCcgttatactgagagtcaagacaatgcgaatccatttctgattgggttagccggatttttaggccttcacagtgtcacaaacgggaataa  
agattacattttcaccgattgagAGTCCCAAAGATTAGTTTAGTTTCGATAGATTAGATTAGTTTAGTTG  
AGTTTCaaagattagagtcctttataccagagttaagacaactcacttttgggtgggcccagggttgggcttaaagtggcctaaaaaaaat  
ccaattctgattgggttctcgtcatggaggccgaacgagtgaccaagatggcggtacctcgaatgtgaacaagaataatgaaaatattacctg  
attgtgggttatcaagagtaaattgttattccatcgggtccaaaatgaaaatagattaagaaattgttcacaaaccaatccccattttctttcaattgatca  
atttgttgatgtgtgttttgtgtgacaaacatcgaggattcctgatccttatccctcaatatcgttcgtttgggtgcactcgtatcggcctccatggc  
cagccaaggccggtcgcagtcagctgataatcgagttgtcttaactctgggtataaagggactc

>1\_MITE\_CAND\_43287-BTMAR1.11.121.81.7

TACACTCAAGTATTTTCACCGAAAATTCTCCTATCAAAAAATGTAGGATCATTTTTAGCAC  
GTTCAAGCAGCTATAGGGAAATTAACATTGTTGTTGATTGTTGTTCAACGGACAACAATCA  
AGGGGCAAGTGATCTGAAACTCGATGCATGTCTACATATTCTATTAAAATTGTATGTACA  
GAGCCTTCAGAAATATTACACTGTTTACGCAAGCTCGAAACGACCATTTCGAGACTTTT  
GCCCCGACTTCTTCCACGTGACAAATGTTAGTTACCGTTGATGCTCGGTTCCCATGCTCC



TCATCTTCAACGAACTCCTGACCAGTACAGTTTTGAATTGTTTAACCCACTCAAAATAGT  
GAGAACAACTCATATCATGATCTTGGTAAACTTTACTTAGCATACCAAAAGTTTTCGGTAC  
AAGGTAAACCGAGCTTAAACAAAATGTAATGTTAAATCTTTGCTCTGTCAGTGATCGCA  
TAATGAAAATCGCAAAACGCACCTGACTTCCTCGTATTCAAGATGACACAGAATAAACA  
CTGATCAACATAAAACAAAATCTGTGAACGTAGCGTTCTTTAGTATGTTATCAGCTATCAG  
AAAAGTCCAAGAAATCCTAATTCGGACGTACAGCAAGCTAGTTATGACCAAAATCCGGT  
TTCTAATCTAACAGACCTCGTACTTTGAGTGTA

>2\_MITE\_CAND\_851077-BTMAR1.11.121.81.7

TATGTGATGTTTCCTGATAGGGCATCCCCTTCGTGGAGAGAGGTTTCAGAAAATTTTGCCA  
AAGCAGCACAGCTTTACGCTATTTTCAGGTTTCAAGTTTACTAATCGTACAGAGTAAAAA  
TTGTAAAACCTGAACGTATTGAAGTGACCGACAGACTTCTGAAATTAAGAGAACAAAA  
AAAATGAAAGCCACTGGACGCATCCAAGCACCATTATTTCCACAAAAACTGTGTCAAGT  
CTGCGGTTTACACGAGCTTGAGACGTAAAGTCTAAAAATCCATCCTAAAAAAGAA  
TCAGGCAAGAACCTGAAAAAGAAGAAAGAACGAGTATCAACACAGCCGAAGGTAGGA  
GAGATGTGTTTCGGGCCTCTTTTTAAACTTTTCACCCAAATCTGAGCGACACCTCATCGGC  
ATCATACGAGGTCTGTTAGATTAGAAACCGGATTTTGGTCATACTAGCTTGCTGTGCGT  
CCGAATTAGGGTTTCTTGGAATTTCTGATAGCTGATAACATACTAAAGAACGCTACGTT  
CACAGATTTTGTATTATGTTGATCAGTGTTTATTCTGTGTCATCTTGAATACGAGGAAGTCA  
GGTGCGTTTTGCGATTTTCATTATGCGATCACTGACAGAGCAAAGATTTAACATCACATT  
A

>3\_MITE\_CAND\_68532-BTMAR1.11.121.81.7

TAAACAAAATGTAATGTTAAATCTTTTCTCTGTTCGGTGATCGTATGATGAAAATCGCAAA  
ACGCACCTGACTTCCTCGTATTCAAGATGACACAGAATAAACACTGATCAAAATAAAGA  
AAATCTGTGAACGTAGCGTTCTTTAGTATGTTATCAGCTATCAGAAAAGTCTAAGAAAAC  
CTAATTTCGGACGCACAGTAAGCTAGATATGACCAAAATCCGGTTTCTAATCTAACAGACC  
TCGTACTCCTAAGTAAATTCGACGAGAGTATTCAGAAGAAGGTTCCGTGTGCAATTGCT  
GAAAATAAGTCAAGATATTAAGTGTGTCATGAATAGTACGTACTCATTATCAATTTACTTA  
TTTCTGTTTTTTTAATTATACTAAATGTTCAAACCTGCATGCAACGCGGACATGCAATGCA  
ATGGAAGTAACATTTTGTCTTA

>4\_MITE\_CAND\_725296-BTMAR1.11.121.81.7

TACATTTTTCAATCCACAAGGATGATTGGAGTTTCGTCTCCGTATCATAGCCGTACACTCA  
AGTATTATCACCGAAAATTATCCTATCCACAAATTTACGATCATTGTTAGAACGTTCAAGC  
AGCTATAGGTAAATTAACATTTGGTTGGATTTTGTTCACCGGACAACAATCAAAGGGCAA  
GTGTACCTGAAACTCGATGCATGTTTAAATATTCTATCAAAATTGTATGTACAGAGCCTTC  
AGAAATATAACACCGTTCAGCAAGCTCGAAACGACCATTTTCGAGACTTTTGCCCGCAC  
TTCTTCCACGTGACAAATGTTAGTTGCCGTTGATGGTCGATTCCCATGCTCCTCATCTTCA  
ACGAACTCCTGACCAGTTTTGAATCGTTTAAACCCACTCAAAATAGTGAGAACAACCTCATA  
TAATGATCTTGGTAGACTTTACTTAGCATACCAAAAGTTTCGGTACAAGGTATACCGAGC  
TTTAAACAAAATTTAATGTTAAATCTTTGCTCTATCAGTGATCGCATGATGAAAATCGCAG  
AACCCACCTGACTTCATCGTATTCAAGATGACACAGAATAAACACAGATCAAAATAAAC  
AAAATTTGTGAACGTAGCGTTCTTTAATACGTTATCAGCTATCAGAAAAGTCCAAGAAAA  
CCTAATTCGGACGCACATTAAGCTAGTTATGACCAAAATCCGGTTTCTAATCTAACAGAC  
CTCGTATATGCTTTTACGAGAGAGCCAGAGATTGTGGTTCCTCATTGCAAAATGTA

>5\_MITE\_CAND\_223710-BTMAR1.121.81.7

TAGCGTATACCAAAAGTTTTTGGTACAAGGTATACCGAGTTTAAACAAAATTTAATGTTG  
AATCTTTGTTCTATCAGTGATCGCATGATGAAAATCGCAAAACGCACCTGACTTACTCGC  
ATTCAAGATGACACAGAATAAACACTGATCAAAATAAACAAAATCTGTGAACGTAGCGT  
TCTTAAGTATATTTCCAGTTATCAGAAAAGCTCAAGAAAACGTAATTTGGACGCATTATG  
GGCTAGTTATGACCAAAATCCGGTTTCTAATCTAACAGACCTCGTATTGTCCTTAGACATC  
ATGAGACTTAGGCACATCCATGCTCCAGGCTTTCAAATTTTCAGGGATTAAGGCCGAGTG  
GAATCTATTTCTGCAGATCCACTCGTCAGTTCCATGAAAATTTGTGCGCCACCACCGGGAT  
TCGAACCCGGGACCTATTGGCCTAGAGTCAGACGCGCTGACCACTAGGCCAACCTGGCC

GGCGTTCGGAACCTCTTAAAATTCCCGAAATGTTCCGGATCTTTTTTAAAATTCCCGAAAT  
GTTCCGGATCTTTTTAAAATTCCCGGAATATTCCGGATCTTTTGCATTTTTCGTAACCTTCTC  
GGAACCTTTTGGTAAACCTA

>6\_MITE\_CAND\_258493-BTMAR1.121.81.7

TATTTCCACCTACCTTTTCGTCCATCCATTAAATAAATATCCATTGCTATTTATGTCCACTAA  
ACGTTAAGTCCACATGATTTAACGTCCAACCATGAATATGTCCGAAATTCTCCAAATTCAT  
GGACATGTTATGTCCACATTGTTTACTTCTCATTATAATGACAGGATTCACCTCAAAAATA  
AATGCATGCTACTACTACCTTCATTCTTAAAAACATTTTCATTCTTGAATCAAGTCATGAAA  
GAGTTAGTTAGTACGAGGTCTGTTAGATTAGAAACCGGATTTTGGTCATAACTACCCAC  
AATGCGTCCAAATTACGTTTTCTTGAGCTCTTCTGATAGCTGGAAATA

>7\_MITE\_CAND\_149192-BTMAR1.121.81.7

TATCAGAAAAGCTCAAGAAAACCTAATTCGGACGCATTGTGGGCTAGTAATGACCAAAA  
TCCGGTTTCTAATCTAACAGACCTTGTATCCCCTTCCATCATCTGGAAAAAACTCCTCAT  
TTCTCAATAATTAATTTTCTACACCTCTCAATTTTATGGTTCGAAACATGCTATTAGCATACT  
TTTTCAAATCCTGTTATTGCGCTTGTTTAACTTTTTTTTCTTAGACTCCACAACATAGGAA  
AAAATGGACATCAGAGATTTTTTTTTTGAGATGCTCCAATATTTACTTTTATTCTAGCAATG  
TTAACTTGTCTCCTATGTTTGTTTATGAAAAAGGTTTTTTTAGAATCACAATGAGTGCAAA  
CATTTTTTGTA AAAAATCAAAACCAATCTACTCAGGTCAGTCAATTCATGGACGAGTTTT  
GAGACCCTACTGCGCAGTGGCGGTAAGAAGTTTTAATGCAATGTATACCTCATAAGAGA  
AGCTAATGCTGTATTATACTGGCCACAGTTGAGTCAGAGTAAGGCAGGGGAGTAAATTTT  
AAAAAGATGTACAGTAGTTGACTTGTGTAGGTTGGTCTTTTAAAAAATCATAGTAGTCGG  
TAAGAATTTTATGGACCAAGCATTCTTTCTGCACATGTAATCAAAGTTAGTTTTCTGATA

>8\_MITE\_CAND\_570250-BTMAR1.121.81.7

TAATTTCTCAATTTTTTTCACAGTGGCGTGGCGTGCTTTGCGGTGAATCGATTTATCTGCCA  
TTTAAACCTATGGAAAGGGATCGATAAACAGAGTGTTTCGCGCCGGAACCTCAAAAATC  
GATTCTTTACCGTAGCTTCAAATGGGGAGATCCGAGGTCTGTTAGATTAGAAACCGGATT  
TTGGTCATAACTAGCCTACTGTGCGCTTGAATTAGGTTTTCTAGGTCTTTCCTGATAGCTG  
AAACATACTTAAGAACGCTACGTTTCACAGATTTGAAAAATCTAAATTAGCTTCGTTGGT  
ATGTGGCTTCAAGTACAGCAACCTCATGGGTGTTTTGCGATTTTATGTTTGACCGAACTT  
GTCTCTCTTTTTTTCGGCCATGCACTACATTTTTCAATCCACAAGGATGATTGGAGTTTCGT  
ATCGTAGCCGTACAGCGTACACTCAAGTATTATGACCGAAAATTATCCTATCCAAAAATGT  
AGGATCATTGTTAGAACGTTCAAGCAGCTATGGAGAAATTA

>9\_MITE\_CAND\_818000-BTMAR1.121.81.7

TACTTCAAGCATTGTGCAATGCGTGAAGTATCCACTTAGGTTTCGTAGGCGCCAGTGAGCC  
TCTCGTGCTGGCAGCACGCCGCTCCGCTCTGTTAGGTTGTAATATTTATACTCGCATAGTC  
AGCGTTTTTTAACTGATGATTTTGAAATGTTTGCACACTCTGCATTGATTATTTTCATTTAA  
ATTGATGGGAAAAAAATATGTACCAATTTATCAAAGGAGAATAATAATTTAATGTTTGTTT  
TTTAAATATTGGTGGTTCCGTGTTTCCGTTCACTAAGGCGGAATTCTTATGAGGTATGAGT  
AAGATTCTTTTGGCTTCAAGATTTTTCAAGGCTCAAGTGGAAGAAGCTTACATCACAC  
GATCAAACGTTGCTATCAATATATTAAGTCAGGTGTTGAGAATGGCCTATTTAGTGACTT  
GGACTAATCATAGCATTTTACCTAGATACGAGGTCTGTTAGATTAGAAACCGGATTTTGGT  
CATAACTAGCCCAATGCGTCCAAATTACGTTTTCTTGAGCTTTTCTGATAGCTGGAAAT  
ATACTTAAGAACGCTACTTTCATAAGTTTGAAAAATCCTAATGAGCTTCGTTGGTATGTG  
GCTTGAAGTA

>10\_MITE\_CAND\_887158-BTMAR1.121.81.7

TATTTCCAGCTGATTTCGTTAGATCCGAAAAAACTACAAGCATTCCACCTCGGTGCCGCG  
GGGAAAGCGCAGTTACTGAGCTGTATGTTTAAAAAATTGAGAAATTTTCGCGCACTTCAC  
CGCAAAATCGCGGCATGTACACGATTATTCCAACGGCATTGAAAGCGATTTAAAGTTACG  
CGTAGTTCGACTCAATATTGAGGAATTTACGCAGGGTTTCCTGCAGTTCATCGAGATCAC  
AAAAGATCACTCAATTTTCAGGTTCGAGATGACGGAAAAATACGCAATTTATAGATAGATGC  
GGGCAAAATATTCATGAGAGTCAGTTACTTGAGATTGCGAAAAAGCCATGATTTTCCTTCA  
ATTTTGCCTGATACCACAAACCTACTCCGGAGTTCGAATACGAGGTCTGTTAGATTAGAA

ACCGGATTTTGGTCATAACTAGCTCACAATGCGTTCGAATTAGGTTTTCTTGAGCTTTTAT  
GATAGCTGGAAATA

>11\_MITE\_CAND\_593479-BTMAR1.121.81.7

TACTTTGTATTCAATCAATTAAACAATAACAACACCATACAAAAAAAAAAAAAAAAATAATAA  
TAATACCTAATCCAAAAGCCATACAAAAATTTAGAAAACAGAACCTAACAAAACTGTAAT  
ACAAGGTCTGTTAGAAATAGAAACCGGATTTTGGTCATAACTAGCTCACAATGCGTCCGAA  
TTAGGTTTTCTTGAGCTTTTATGATAGCTGAAAATATACTTAAGAACGCTACGTTACACAGA  
TTTTGTTTATTTTGATCAGTGTTTATTCTGTGTCATCTTGAATACAAGTA

>12\_MITE\_CAND\_836120-BTMAR1.121.81.7

TACGAGGTCTGTCAGATTAGAAACCGTATTTTGGTCATATCAAGCCCACAATGCGTCCGA  
ATTAGGTTTTTTTGAGCTTTCCTGATAGCTGGAAATATACTTATGAACGCTACGTTACACAG  
ATTTTGTTAATTGATCAGTGTTCAATCCGTGTCTGGGAATCGACCCTAACGGCAACTGA  
CATTTGAAGTGCGGAAAGTGCGTCATTTTGGAAGAAAGTGCGGGCTAAAGTGCTCGAAA  
ATGGTCGTTTCGAGCTTGTTGAACAGAGTAATATTTCTGAAGGCTCTGTACATACAATTTT  
GATAGAATATGTATAGACACGCATCGAGTTTCAGCTACACTTGCCCCTTGATTGTTGTCCG  
TTGAACGAAAATCCAACCAAATGTCAATTTCCCTTTAGCTGCTTGAACGTTCTAACAATG  
ATCCTACATTTTGGATAGGATAATTTTCGGTGACAATACTTTAGTTTACGGCTACGATATG  
GAGACGAAACTCCAATCGTCCTTGTGGGTTGAAAAATGTAGTGCAAGACCGAAATAAG  
ACAGACAAGTTCGGTCAAACATAAAAAATCGCAAAACACCCTTGAGGTTGCCTTACTTCA  
AGCCACATACCAACAAAGCTAATCAGGACTTTTCAAATTTGTGAACGTAGCGTTCGTAA  
ATATATTTTCAGCTGTGCGGAAAAGCTCAAGAAAACGTAATTTGGACGCATTGTGAGCTAG  
TTATGACCAAATCCGGTTTCTAATCTAACAGACCTCGTA

>13\_MITE\_CAND\_120636-BTMAR1.121.81.7

TAGGATTTTCAAATGAAAGTAACTCAAAGCCATTCTTAAAGTAAAAATAAACTTTTTAA  
TAGGTTGCAACTCTTTCTGGCTCATTGCAACATAATATGCTTAGTTTCCCTATGTAGATAG  
GAGCTTTTGCAAGTGAGCCAGATATACGAGGTCTGTTAGATTAGAACTGGATTTTGGTC  
ATAACTAGTCCACAATGCGTCCGAATTAGGTTTTCTTGAACCTTTTCTGATAGCTGGAAGTA  
TACTTAAGAACGTTACGTTACAAATTTGAAAAATCCTA

>14\_MITE\_CAND\_546600-BTMAR1.121.81.7

TATTCAAGATGACACAGAATAAACTGATCAAAATAAAACAAAATCTGTGAACGTAGCG  
TTCTTAAATATATTTCCAGCTATCAGGAAAGCTCAAGAAAACCTAAATCGGACGCATCGT  
GGGCTAGTTATGACCAAATCCGGTTTCTAATCTAACAGACCTCGTATCGCTGTGAAAAG  
TTGAGTTTTCCGTAGATTTAGCACTTTCCGTATGGTCTTTAAGGTAATGACAAAAAGTGC  
TAAATTGAAGGAGAAGTCAACTTTTGACAGCGATATTCTTTAAATTCATCATGAA

>15\_MITE\_CAND\_120637-BTMAR1.121.81.7

TAATATGCTTAGTTTCCCTATGTAGATAGGAGCTTTTGCAAGTGAGCCAGATATACGAGGT  
CTGTTAGATTAGAACTGGATTTTGGTCATAACTAGTCCACAATGCGTCCGAATTAGGTT  
TTCTTGAACCTTTTCTGATAGCTGGAAGTATACTTAAGAACGTTACGTTACAAATTTGAA  
AAATCCTAATTAGCTTCGTTGGTATGTGGCTTGAAGTAAGACAATCTCATGGGTGATCTG  
CGATTTTCATGTTGACCGAACTTTTCTCTCTTTTTCTGGTCTTGCACTACATTTTCAAC  
CCACAAGGATGATTGGAGTTTCGTTTCCATATCGGAGCCGTACACTCAAGTATTGTCACC  
GAAAATTATCCTGTCCAAAAATGTATAGGATCATTGTTAGAACGTTCAAGCAGCTAAAGG  
GAAATTGACATTTGGTTGGATTTTTGTTCAACGGACAACAATCAAGGGGCAAGTGTACC  
TGAAACTCGATGCATGTCTACATATTCTATCAAATTTGTATGTACAGAGCCTTAAGAAATA  
GGAGGATACAAGAAATAAGAAAATAAGAGGCCTATCGTTAACTGCACTGTTTCAAGCAAGC  
TCCACACGACCATTTTCGAGCACTTTTGGCCGCACTTCTTTACGTGACAAATGTCAGTT  
TCCGTTGATGGTCGATTCCTATGCTCCTCATCTTCGACGAACTCCTGACCAGTTTTACCCA  
CTCAAAACAGTGAGAACAACCTCATAAAAGATCTTGGTAAATTTTACTGAGCATA

>16\_MITE\_CAND\_158872-BTMAR1.121.81.7

TACGAGGTCTGTTAGATTAGAAACCGGATTTTGGTCATAACTAGCCCACAATGCGTCCGA  
ATTAGGTTTTCTTGAGCTTTCCTGATAGCTGGAATTATACTTAAGAATACTACCTTCACAG  
ATTTTGTTTATTTTGATCAGTGTTTATTCTGTGTCATCTTGAATACGAGTAAGTCAGGTGC

GTTTTGCGATTTTCATCATGCGATTACTGATAGAGCAAAGATTCAAAATTTAATTTTGT  
TAAACTCGGTATACCGTGACCGAACTTTTGGTATGCTAAGTAAAGTTTACCAAGATAA  
TTGTATGAGATGTTCTACTGTTTTGAGTGGGTAAACGATTCAAAACTGGTCAGGAGTT  
CGTCGAAAATGAGGAGCATGGGTATCGACCCTCAACGGCAACTGACATTTGTCACGTGG  
AAGAAGTGCGGGCAAAGTGCTCGAAAATGGTCGTTTCGAGCTTGTTGAACAGAGTAA  
TGTTTCTGAAAGCTCTGTACATACAATTTTCATAGAATATGTAGACATGCATCGAGTTTCA  
GGGACACTTACGTCTTACTTCAAGCCACATACCAACAAAGCTAATCAGGATTTTCAAAT  
TTGTGAACGTAGCGTTCTTAAATAATATATTTTCAGCTATCAGAAAAGCTCAAGAAAACG  
TAATTTGGACGCATTGCGGGCTAGTTATGATCAAAATGCGGTTTCTAATCTAAGAGACCT  
CGTA

>17\_MITE\_CAND\_290330-BTMAR1.121.81.7

TACATTTTGGATAGGATAATTTTCGGTGACAATATTTTAGTGTACGGCTACGATATGGAG  
ACAAAACCTCCAATCGTCCTTGTGGGTTGAAAAATGTAGTGCAAGACCGAAAAAAGAGA  
GACAAGTTCGGTGAAACATAAAAAATCGCAAAACACCCCTGAGGTTGCCTTACTTCAAGC  
CACATACCAACGAAGCTCATTAGGATTTTCAAACCTGTGAACGTAGCGTTCTTAAGTAT  
ATTTCCAGTTATCAGAAAAGCTCAAGAAAACGTAATTTGGACGCATTGTGGGCTAGTTAT  
GACCAAAATCCGGTTTCTAATCTAACAGACCTCGTATTATTTACTTTCGAAAAGTTTCGA  
GTTGACGCAATGAATGGCTTTCAAGTGGTTTAGACTCGATTATTCTTGTATTTAATTTGAA  
ACTTTATGAACTAATTGACTCGGCTTCGCTTGGTAGCATGTGACGTGAGGTGAGCAGG  
TGAATTCATCCAACCTATACGGATGGATTTCTCAGTTACCGAGGTGGATACTGGTACCGT  
GATGGAATCAGTTTCTTTTAGACGGGCGTAAGTGCAAAATCACGTGAGCCCTGGCTTTC  
GTTGATCACGCAGGACGCTAGGGCTGCCGTGTTAAGAAAAAACGCCGTATGAACATTGC  
AAAGTTGCCAAATTTCTCGGAATTGTATTTTAAAGAAAGTTATGAATATTTTCTCTGA  
AATTTTCAGATAATTTAGTTCAAATTGCGTACAAAATTGTCCAAAAATGTA

>18\_MITE\_CAND\_580679-BTMAR1.121.81.7

TAATTTGGACGCATTGTGGGCTAGTTATGACCAAAATCCGGTTTCTAATCTAACAGACCT  
CGTAGAGGGGATTTCCCACGCTATCCTGAGCGTCCACGTCTACATCAAGACAACTCTC  
CATGCGAAGATAGGTAACAACAGGCCCGCCGCAAGGGGGGAGGGGGGATACTGGATCC  
CTGGTACCGGGGCCCATGTTACCCGTGGAACCACTACGAATTCACATGCAACCCTTG  
TTTCGTAAGAAAAGGTGAAAATTTTACCCTAAAAATTTTGCAAAAGGTGAATAGATTTTC  
AGAAACACGCTGGGGCACTGTGAAATTTCTTATTAAATTTTCAAAGAAGTATACTTCTTGG  
AAAATTTCTATCTATTTTCAAAGAAGTATACTTCTTGGAATTTCTATCTATTTTCAAAT  
TTTCAGTACGGAGGGATATTTTAGTAACTGCGTTTCATTTTCTTCCGTCGTCAGATGCTA  
AGAGCCTCCAGTCTGGGCATCCTCGACTTCAATGGCTCATGGCTCAACTCCCTTGCCATA  
GACAAACGAAGGGGGAGTCCAGGGGGGCATGGCACTCTTAGAACTGACAATAGTATCAT  
ATGCCCCCCCCCCCCCCCCGAAAAAAAAAAAAAATTCCAGATGTTTTGAATGCAACAAT  
TCGCAAGTATTTTGTGCTGAATGTAGAAAAAAACATAATTATTCCGCGGAAATTGATGG  
AACAATTCTTTATGGTACCTTCAAATGCGTCCAATTA

>19\_MITE\_CAND\_761583-BTMAR1.121.81.7

TAGGATTTTGTGAAAGACTTTCTTCATTCTGCTTTCAAACCTTTTAAAGAAATGCTGCAC  
AAATTTTGAGAATAATATCACCATCTATTGGGAAAATATCTGAGAAAATATCAAAGATCTA  
TCTATTTCTGAGATATCTACGAGGTCTGTAGATTAGAAACCGCATTTTGGTCATAACTAG  
CCCACAATGCGTCCAAATTACGTTTTCTTGAGCTTTTCTGATAGCTGAAAATATGTTTAAAG  
AACGTTACGTTCAAAATTTGAAAAATCCTA

>20\_MITE\_CAND\_738184-BTMAR1.121.81.7

TACGAGGTCTGTTAGATTAGAAACCGGATTTTGGTGATAACTAGCCCAGTGTGCGTCCGA  
AATAGGTTTCTTGGACTTTCTTGATAGCTGAAAATATACTTAAAAACGTTACGTTTACA  
GATTTTATTTATTTTGATCCGTGTCTATTCTATGCCATCTTGAATACGAGTATGTCAGGTGC  
GTTCTGCGATTATCATCATGCGATCACTGATAGAGCAAAGATTTAACATTAAATTTTGT  
TAAACTCGGAATACCTCATTCCAAAACCTTTTGGGTTGCTAAGTAAAGATTACCAAGATCA  
TTTTATGAGTTGTTCTCACTGTTTTAAGTGGGTAAACAATTCAAAACTGGTCAGGAGTT  
CGTTGAAGATGAGGAGCATGGGAATCGACCATCAATGGCAACTGACATGTGTCCTGTGG

AAGAAGTGC GGGCAAATGTGCTTGAAAATGGTCGTTCCGAGCTTGCTGAACAGTGTAAT  
ATTTCTGAAGGCTCTGCACCTACAATTTTGATAGATATGTAGACATGCATTGAGTTTCAGG  
TACACTTGCACCTTGATTGTTGTCCATTGAACAAAAATCCAACCAAATGTCAATTTCCCT  
TTCGCTGCTTGAACGTTCTAACAATGATCCTAAATTTGTGAACGTAGCGTTCTTAAGTATA  
TTTCCAGCTATCAGGAAAGTTCAAGAAGACCTCATTTCGGACGCATTGCTGGCTAGTTATG  
ACCAAATCTGGTTTCTAATTAAACAGACCTCATA

>21\_MITE\_CAND\_240263-BTMAR1.121.81.7

TACTTCAAGTTACCACTTTAAGTTAAAATTTTCGCACTGAAAAAAAATTCTCGGCGTTTT  
TACCACGGTCCGTTGGCACCTTTACCATCTCACTTTTTTTTTTACCAATTATTGGTAATTTTA  
CCAAGACAGACTAGATAGCTTACCTAAAGATCGGTATTTTTCTCTGTTTTTTTTTTCAGGTAA  
GAATACCACTTTTATTGGTAATCAATTCCCGGTAACCTTTGCCATTTTATCTCGGTAACCTCTA  
CCACAGTCGATAAAAAAATATTGGCGTTTTTACAAAGGTCCAGTAAAATTACCGAGAAA  
GTTCAATAATTTTACTGAGATTTCTCGTCTCGGTAAAATTACCAATTCCATAAATGGTAAT  
TTTACCAAGAAAAAACTGGGATCAAATAGAACCCTGAACCTCTCGGTAATTTTACCCTTTT  
CTTAGTAAATACACAGAGATTTTTTTTCCAAAGTTTAAGTAACCACTTTAAGTTAAAATTTT  
GGGTACTCACCTGCTATGCCTGAGCCCCTCGAGGGTTTCGGCTTTTCGGAGGTTTACGA  
GGTCTGTTAGATTAGAAACCGGATTTTGGTCATAACTAGCCCACAATGCGTTCAAATTAC  
GTTTTCTTGAGCTTTTTCTGATAGCTGAAAATATATGTAAGAACGCTACGTTACAAATTTG  
AAAAATCCTAATTAGCTTCGTTGGTATGTGGCTTGAAGTA

>22\_MITE\_CAND\_586878-BTMAR1.81.7

TATTTTAAAGTATCAGAATGCATGAAGAAATGTACGAGGTCTGTTAGATTAGAAACCGGA  
TTTTTGTCACTAGCCTACAATGCGTCCAAATTACGTTTTCTTGAGCTTTTCTGATAGC  
TGAAAATA

>23\_MITE\_CAND\_130435-BTMAR1.12

TAAATGTCAATTGAGGTGCTTTTAGCAAAAAGTATCATGGAAAATGGAATCATGGTACAT  
ATCATGGAATGCTGTATGAGCCTGCATACATTTCGAAATTTCTTTGATGCAAGGTCTGTT  
CAATAAGAAACCATATTTTGGTAATACTAGCCTATTGTGCGTCCTAATTAGATTTTCTTG  
GACTTTCCTGATAGCTGATAACAATTGAAGAACGCTAGATTCACAGATTTTGTTTATCTTG  
ATCAGTGTTTCATTCTGTGTACCTTGAATATGAGTAAGTCTGGTGCCATCTGCGATTTTAA  
TGATGCGATCACTTATAGAGCAAAGATTTAACATTAAATTTTGTTTTAAACTCGGTATCCC  
CTGCACTAAAACCTTTAAATATGTGAAGTAAATTTTACCAAGATCATTGTATGAGTTGTTCC  
CAGTGTTTCGAGTGATTTAAAAAGTTCAAAAGTGGTCAAAAGTCCGTCGAAGATAAGG  
AGCACGGGAATTGACCATCAACAGCAACTGACATTTA

>24\_MITE\_CAND\_652898-BTMAR1.12

TAAGTAGCTTATTGTGTGTCGGAATTAGGTTTCATTGGACTTTCCTGATAGCTGATAACAT  
ACTAAAGAATGCTACATTCACAGATTTTGTTTAATTTAATCAGTGTTTCATTCTGTGTACC  
TTGAATACTAGTAAATCAGGTGCGTTCTTAAGTATATTTTCTGCTGTAAAGAAAGTCCAAG  
GAAACTTAATTCGGACGCATGATGTGCTAGTTA

>25\_MITE\_CAND\_783882-BTMAR1.15

TATCTTTATTTCAAGAAAAATTTAGATACAACTTAAAAAAAACCCAGGTTTTAAGTTAGA  
AACTTCGTTGCTCTCTTATTCAAATGCTTAAAAATAAGGAAATTAACATTTTAAGCAGCTT  
ACCAAGTCATCACCTATCCCCTTCAAATACTAGCCAGCTTTGTCGATGCATTTTTGCCAC  
CGTTTCTTCAATTGGGAGAAACACTGTTGGAAATCCTCAGGTTTGAATGATCGCAATTCC  
TTCAAGGTGTTCTCTTGAATTCCCGGAATGGTTTGAAAACGTCGACCTTTCAAGGTAGAT  
TTAAGTCGTGGAAATAAGAAAAAATCACACGGAGCCAGGTTAGGTGAATAAGGGGGAT  
GAGGGAGGACACTCATGGCATTCTTTGCACAAAATTCGCCAATTTGGAGGGATGCATGG  
GCAGGTGCATTATCGTGATGCAGAAACCAGGAATTCTCTCTCCAAAGCTCAGGCCTTTTT  
CTGCGGACATTTTCGCGTAATCGTCTCAGAACACCATTGTAATATTCGCGATTGACAGTTT  
CACCTTGAAGGAATTGCGATCATTCAAACCTGAGGATTTCCAACAGTGTTTCTCCCAACT  
GAAGAAACGGTGGCAAATATGCATCGACAAAGCTGGCTAGTATTTTGAAGGGGATAGGT  
GATGACTTGGTAAGCTGCTTAAAATGTTAATTTCTTATTTTTAAGCATTTGAATAAGAGA

GCAACGAAGTTTATAACTTAAAACCTGGGTTTTTTTTTAAGTTGTATCTAAATTTTTCTTGA  
AATAAAGATA

>26\_MITE\_CAND\_19796-BTMAR1.15

TACGAGGGCTGTCCCAAAGAAACCGGACTTTCGTCATAGAAGGCGAACCGAGCGTGC  
TAATGAAGTTTTCTGGGGCTTGTTTGAAAGCTGATAAGCTACTAAAGATGCTTGTTTTTA  
CGGAATGCAAAAATTCGTCTTGGTAAGGGAACCTACACGCTTTGGAATAAAGGAAAGTCA  
AACTCGAGTTGCGATTTTTGTCTTTATTTCAAGAAAAATTTAGATACAACCTTTACAAAA  
AACCCAGGTTTTTAAGTTAAAAACTTCGTTGCTCTCTTCTTCAAATGCTTAAAAATAAGGA  
AATTAACATTTTAAGCAGCTTACCAAGTCATCACCTATCCCCTTCAAAATATTGCGCAGCT  
TTGTCGTTTTTGACTTTCCTTTATTCCAAAGCGTGTAAGTTCCCTTACCAAGACGAATTTTT  
GCATTCCGTAAAAACAAGCATCTTCAGTAGGTAGCTTATTAGCTTTCAAACAAGCCCCAG  
AAAACCTTCATTACGACGCTCGGTTTCGCCTTCTATGACAAAAGTCCGGTTTCTTTTGGGAC  
AGCCCTCGTA

>27\_MITE\_CAND\_11190-BTMAR1.15

TATCCCCTACAACCTAATCTCATGCCTATTACTTCAGGATTGAGTCATCACTTTTTATTTTTT  
AACAGGAGCTTGAGATACGAGGGCTGTCCCAAAGAAACCGGACTTTTGTCAATAAAG  
GCGAACCAAGCGTTGTAATGAAGTTTTCTTGGGCTTGTTTGAAAGCTGATAAGATACTG  
GAGATGCTTGTTTTTACAGAATGCAAACATTTCGTCTTGGTAAGGAACTACACGCTTTGG  
AATAAAGGAAAGTCAAACCTCGAGTTGCGATTTTTGTCTTTATTTCAAGAAAAATTTAGAT  
ACAACTTTAAAAAAAACCCAGGTTTTAAGGTAAAAACTTCGTTGCTCTCTCATTCAAA  
TGCTTAAAAATAAGGAAATCAACATTTTAAGCAGCTTACCAAGTCATAACCTATCCCTTC  
ATAATACTCGCCAGCTTTGTCGATGCATTTTTGCCACTGTTTCTTCAATTGGGAGAAACA  
CTGTTGGAATCCTCAGGTTTGAATGATCGCAATTCCTTCAAGGTGACCTGACCTGGCTC  
CGTGTGATTTTTTCTTATTTCCATGACTTAAATCTACCTTGAAAGGTGCACGTTTTCAAAC  
CATTCCGGAAATCCAAGAGAACACCTTGTAAGGAATTGCAATCATTCAAATCTGAGGATT  
CCAACAGTGTTTCTCCCAATTGAAGAAACGGTGGCAAAAATGCATCGACAAAGCTGGC  
GAGTATTTTGAAGGGGATA

>28\_MITE\_CAND\_431153-BTMAR1.15

TACAACTTTAAAAGAAAAACCCAGGTTTTAAGTTAAAAACTTCGTTGATCTCTTACTCAA  
ATACTTAAAAATAAGGAAATTAACATTTTAAGCAGCTTACCAAGTCATCGCCAATCCCCT  
TCAAAATACTCGCCAGCTTTGTCGATGCATTTTTGCCACCGTTTCTTCAATCGGAAGAAA  
CACTGTTGGAATCCTCAGGTTTGAATGATCGCAATTCCTTCAAAGTGTTCTCTTGAATT  
TCCGGAATGTTTGAAAACGTGACCTTTCAAGGTAGATTTAAGTCGTGGAATAAGAC  
AAAATCATACGGAGCCAATTCCTGGTTTCTGCATCAAGATAATGCACCTGCCCATGCATC  
CCTCCAAATTCGCGAATTTTGTGCAAAGAATGCCATGAGTGTCTCCCTCATCCCCCTCA  
TTCACCTATGACCTGGCTCCGTGTGATTTTGTCTTATTTCCACGACTTAAATCTACCTTGA  
AAGGTGCACGTTTTTCAAACCATTCGGAATTCAGAGAGCACTTCGAAGGAATTGCGA  
TCATTCAAACCTGAGGATTTCCAACAGTGTTTCTTCCGATTGAAGAAACGGTGGCAAAA  
ATGCATCGACAAAGCTGGCGAGTATTTTGAATGGGATTGGTGATGACTTGGTAAGCTGTT  
TAAAATGTTAATTTCTTATTTTTTAAGCATTTGAGTAAGAGAGCAACGAAGTTTTTAACTT  
AAAACCTGGGTTTTTTTTTTTAAAGTTGTA

>29\_MITE\_CAND\_401238-BTMAR1.15

TAAATCCTGATTGGCCTCAAATCCTGATAGAAACGGGAAAATCTTGATGCTAGACGCCCT  
GTTTACCAACATTAGTAACTTGATAAATGCGTTTTTTAGGGGGGCTTTCTTCCATTCCTTG  
AAATTCTTGCACGACAAATTTGCTGTATCTGCGCATGGAAGGTTTGACTGGACATAGAA  
GTAGACTTCGTATGCAGACTCCTTCATTACAGCCACAACCTTTGAGAGCTCTTTTTGAGTT  
TGGAAGTTTGTTTCAAAGATAACCAGTTGCACCATCGTGTTTCTCAAAACATTTTACGAA  
AGAAAAAGTACGAGGGCTGTCCCAAAGAAACCGGACTTTTGTCAAGAAGACGAACC  
AAGCGTCGTAATGATGTTTTCTGGGGCTTGTTTCAAAGCTAATAAGCTACTGAAGATGCT  
TGTTTTTACAGAATGCAAAAATTCGTATTGGTAAGGAACTACACGCTTTGGAATGAAG  
GAAAGTCAAACCTCGAGTTGCGATTTTTGTCTTTATTTCAAGACAAATTTAGATACAACCTT  
AAGAAAAACCCAGGATTTA

>30\_MITE\_CAND\_474286-BTMAR1.15

TAAAAAGTTGATGCATGTTAATAATATTTAAGAAAAGAAAAAGAAAAAAGGGGGACAT  
ATTATTAAAATGTACGAGGGCTGTCCCAAAGAAACCGGACTTTTGTTCATAGAAGGCGA  
ACCGAGCTTCGTAATGAAGTTTTCTTGGGCTTGTTTCAAAGCTGATAAGCTACTGGACTA  
CTGGAGATGCTTGTTTTTACAGAAATGCAAAAATTCGTCTTGGTAAGGAACTACACGCTT  
TGGAATAAAGGAAAGTCAAACCTCTAGTTACAATTTTTGTCTTTATTTCAAGAAAAATTA  
GATACAACCTTTTTTTA

>31\_MITE\_CAND\_682793-BTMAR1.15

TACGAGGGCTGTCCCAAAGAAACTGGACTTTTGTTCATAGAAGGCGAACCGAGCGTCG  
TAATGAAGTTTTCTTGGGCTTGTTTGAAAGCTGATAAGCTACTGGACATGCTTGTTTTTA  
CTGAATGCAAAAATTCATCTTCTTAAGGAAACTTCTTAAGGAAAAATGCATCGACAAAG  
CTGGCGAGTATTTTGAAGGGGATAGGTGATGATTTGATAAGCTGCTTAAAATGTTAATTTT  
CTTATTTCTAAGCAATTGAATAAGAGAGCAACGAAGTTTTTCAACTTAAAACCTGGGTTT  
TTTTAAGTCGTATCTAAATTTTTCTTGAAATAAAGACAAAAATCGCAACTCGAGTTTGAC  
TTTCCTTTATTCCAAAGCGTGTAGTTTCCTTAAGAAGACGAATTTTTGCATTCTGTAAAA  
ACAAGCATCTCCAGTAGCTTATCAGCTTTCAAACAAGCCCAAGAAAACTTCATTACGAT  
GCTCGGTTTCGCTTCTATGACAAAAGTCCGGTTTCTTTTGGGACAGCCCTCGTA

>32\_MITE\_CAND\_789650-BTMAR1.15

TAATTTCTTATTTTTAAGCATTTGAATAAGAGAGCAACGAATTTTTAACTTAAAACCTGG  
GTTTTTTTAAAGTTGTATCTTAATTTTTCTTGAAATAAAGACAAAAATCGCAACTCGAGTT  
TGACTTTCTTTTATTCCAAAGCGTGTAGTTTCCTTACCAAGACGAATTTTTGCATTCTGTA  
AAAACAAGCATCTCCAGTAGCTTATCAGCTTTCAAACAAGCCCAAGAAAACTTCATTAC  
GACGCTTGTTTCGCTTCTATGACAAAAGTCCGGTTTCTTTTGGGACAGCCCTCGTATAG  
CTGACTGCAAAGTTATATCATAGGAAAGATGTACAAAAATCACAATAAGTAGATAAGAAA  
AGCCTAAAATCTGCCCTTTTACACAATATTAGCATAATCTGTCTCCTGTATTTTTATTTTC  
CACTTCTATGGCCACTCCTTTTTTACTTGCTAGCAATGAGGTTAGCAGAGATAAATTTTAA  
ATAGCTTAGTATACATAAAGGAAATTA

>33\_MITE\_CAND\_53564-BTMAR1.15

TACGAGGGCTGTCCCAAAGAAACCGGACTTTTGTTCATAGAAGGCGAACCGAGCGTCG  
TAATGAAGTTTTCTTGGGCTTGTTTGAAAGCTGATAAGCTACTAAAGATGCTTATTTTTAC  
AGAATGCAAAAACCTCGTCTTGGTAAGGAACTACACGCTTTGGAATAAAGGAAAGTCA  
AATTAGAGTTGCGATTTTTGTCTTTATTTCAAGAAAAATTTAGATACAACCTTTAAAAAAA  
ACCCAGGTTTTAAGTTAAAAACTTCGTTGCTCTCTTGTTTCGCTTCTATGACAAAAGTCC  
GGTTTCTTTTGGGACAGCCCTCGTA

>34\_MITE\_CAND\_605188-BTMAR1.15

TACGAGGGCTATCCCAAAGAAACCGGACTTTTCGTTATAGAAGGCGAACCGAGCGTTGT  
AATGAAGTTTTCTTAGGCTTGTTTGAAAGCTGATAAGCTATGGGAGATGCTTGTTTTTAC  
AGAATGCATAAATTCGTCTTGGTAAGGAACTACACGCTTTGGAATAAAGGAAAGGCTA  
ACAGGAATTTGATTTTTGTCTTTATTTCAAGAAAAATTTAGATACAACCTTAAAAAAAAC  
CCAGGTTTTGAGTTAAAAACTTCGTTGCTCTCTTATTCAAATGCTTAAAAATAAGGAAAT  
TAAAATTTTAAACATATAACCTGGATTTTTTTAAGTTGTATCTAAATTTTTCTTGAAATAAAG  
ACAAAAATCGCAACTCGAGTTTGACTTCTCCAGTAGCTTATTAGCTTTCAAACAAGCCC  
AAGAAAACTTCATTATGATGCTCGGTTTCGCTTCTATGACAAAAGTCCGGTTTCTTTAGG  
GACAGCCCTCGTA

>35\_MITE\_CAND\_177669-BTMAR1.15

TAAAAATAAACCCAGGTTTTAAGTTAAAAACTTCGTTGCTCTCATATTCAAATGCTTAAA  
AATAAGGAAATTAACATTTTAAGCAGCTTACCAAGTCATCACCTATCCCCTTCAAATAAC  
TCCCCAGCTTTGTTGATGCATTTTTGCCACCGTTTCTTCAATTGGAAGAAAAACTGTTGG  
AAATCCTCAGGTTTGAATGATCGCAATTCCTTCAAGATGTTCTCTTGAATTTCCGGAACG  
GTTTGAAAACGTCGACCTTTCCAGGTAGATTTAAGTCGCGGAAATAAGAAAAAATTACA  
CGAAGCCAGGTCAGGTGAATAAGGGGAATGAGGGAGGACACTCATGGCATTCTTTGCA  
CAAAATTCGCGAATTTGGAGGGATGCATGGGCAGGTGCATTATCGTGATGCAGAAACCA

GGAATTGGCTCCGTGTGATTTTTTCTTATTTCCACGACCTAAATCTACCTTGAAAGGTGCG  
ACATTTTCAAACCATTTTCGGAAATTCAAGAGAACACCTTGAAGGAATTGCGATCATTCA  
AACCTGAGGATTTCCAACAGTTTTTCTTCCAATTGAAGAAACGGTGGCAAAAATGCATC  
GACAAAGCTGGCGAGTATTTTGAAGGGGATAGGTGATGACTTGGTAAGCTGCTTAAAAT  
GTAAATTTCTTATTTTTTAAGCATTGAATAAGAGAGCAACGAAGTTTTTAACTTAAAAC  
CTGGGTTTATTTTTA

>36\_MITE\_CAND\_766546-BTMAR2.112.13

TACGAGGGGCATTTCGTAAAGTAAGTATATATCTTTATTATCTCCGGAACATAATGAAGATAA  
ATTAAATCGGTAGAAATTGTTTTTACCGCCATATTCTCAGCTTTTTTAAAAAGCCCTCGTTT  
TTTAAATTTGGTTCCTGTTTCGCGAGTGACGTCATTTTTTCCCGCGACCACCACTCGTCA  
CTGCGTGTCCAAAATATTCGAGTGCGGCGGAGGTCCTCGAGTGCCCCCTCGTA

>37\_MITE\_CAND\_136287-BTMAR2.82.9

TATTCGTATCCACTTTCTCCGAATCTTCCATAACTTCCTTTTGCTTTTCAAAGTACCGTCC  
ATCAAACCGGATGCACCTTTTTCATGCGCTCTTGCCACTTATCCAACATTGTTTTCTCTGAAT  
TCTTCCTCTGGGATGGAGTTGAAGAAGTTTTGAATTGCATTCTGGATTTCGGTCTTCGAT  
ACGAATCTTCGTCCGCGAAGCTCCTTTTTAAGCGTAGGAAACATCCAAAAATCACATGG  
AGCCAAGTCAGGGCTATAAGGGGGATGAGGGATTGTTTCAACTCCATTTTTTACTCATAAA  
TTCACGTGTAAAGCTCGATGTGTGAGGCCGCGCATTGTCTTGATGGAGTATCCACGAAGC  
TTTCAAGTCCGACCGTTTCCGGGAAATGTGCATTCTCAACTCCTTTAGTACTTTGCAATA  
ATACGCACTGTCAACTGTTGTGTTTGATGGTACAAAATGTTGATAAATGACACCTCGAAA  
ATAAAAAAACACAATAAGCATCACTTTATCGGCCGACTTTTCGATTACGGCGATGAAGA  
ATCTTCCTTAAAAACCGTAGGCGTAAACTTTCTCGCTGATTTCAAATTGCCATAACTCG  
GTCAATTTTTATCCGATTGAGCTGATCTTGTTTTAATCGATAGGTATTGAGTTGATCTTTA  
AAATGAGATCAAGATCATGTCTGTATCTATCTTACTTTTGAAGTTACAGAACAAGTCCCG  
GTGCTTTTGCCTGAAAAAAATATGCCGGTAGATTTTACCATCTCTGACACAGTGATACG  
AATA

>38\_MITE\_CAND\_418547-BTMAR2.82.9

TAATCGATAGGTATTGAGTTGATCTTTAAAATGAAATCAAGATCATGTCTGTATCTATCTTA  
CTTTCGAAGTTACAGAACAAGTCCCGGTGCTTTTGGGACACCTTACGTATACTTTACGCC  
GAAAAAGCGAACCTGAAACTTAAATGCGTTAACTTCCGAAAACCATATATAATTCAACG  
AAAATAAATAATTGGTACATAACAGCTTTCTTGTATGCAAAGAAAATAATTAAAAATGTTA  
AAAAAGAGATGTCAACACAAAATTACATAGCCCCTTCAATTACAGAAGATACTACAAACG  
AACTGTACCTTAACATTTTCATATCCCAGAAGCTAACGTTCCCATGACGAATATTGCTATC  
GCTAGCGATTGCAAATCCAACCTTGTTTCTCTTTGAATCCGATTTTAATGTGAGAACTAA  
ATTTCTCCCGATTAGCAGCCGGAAGAATCCTCAAGTTCAAAAATACGTAATGAGGAATT  
TTGCCTCGTTTGAACCTTGCATCTGGGCTGTCATATTACCAGCCTTTCTCTCAATTTTCT  
GAGACGTCCTGAAAATATTGGCACGGGTTTTAATTAGGCGAGCGTTGAATACTCACCCCC  
AGCCTAACCCTCACAGATTGCGGGACCGGTTACCAAAGGTTAACAGAACATGCCGCTT  
ACATAGTAGCATTGAAAAGAATGTATTCAATCCACGGTTCATCTAGCTAATAAGTGACCG  
CAAATAGCAATCGATTA

>39\_MITE\_CAND\_541920-BTMAR2.82.9

TAACTCGGTCAATTTTTATCCGATTGAGCTGATCTTGGTTTTAATCGATAGGTATTGAGTT  
GATCTTTAAAATGAGATCAAGATCATGTCTGTATCTATCTTACTTTTGAAGTTACAAAACA  
AGTCCCGGTGCTTTTGGAACACCTTATGTATACTTTACGCGAACTTTAAGCGAACCTGAA  
ACTTAAATGCGTTAACTTCCGAAAACCATATATAATCCAACGAAAGTAAATAATTGGTACA  
TAACAGCTTTCTTGTATGCAAAGAAAATAATTAAAAATGTTAAAAAAGAGATGTCAACA  
CAAAATTACATAGCCCCTTCAATTACAGAAGATACTACAAACGAACTGTACCTTAACGATT  
TCATATCCCAGAAGCTAACGTTCCCATGACGAATATTGCTATCGCTAGCGATTGCAAATC  
CAACTTGTTGTATTTTTAGTTACTCGATCCAAAATACCTCATTCAATTTCTATCGGACAC  
GAGTTCCCTCGTAAATTTAACATTCCTCGCATGGACGGACTGGCTCACATCTAAGAGCG  
TGGACCCTTGGCCGTTTAAGTGGGTGTCGTATGATATTTCCCGGGGGATGCACCCCAGAG  
AAAAAAATTCAAATGAACGTGTTA



>40\_MITE\_CAND\_476880-BTMAR2.82.9

TACTCACTGCATCTTGAAAAATAACAGTGCATACAGCTGGATGTGGAAAATGCCTCGTTG  
TCCGCTGAACGTAGAGAGGAATCGTTTGAGACTTGTGAGAGAGAGAAAAAGGAACAAC  
ATCCTTTACTAGGTAAGTCCATAAAATAGTTCCAGTTAAATTGTCAATACCAAACAGCTGT  
AAAACATTTCTTTTTTAAATGAATGTCACACAGACTTAATTTTGCAAGGGAAAAAATC  
AACAGGATATGTAAAAAGAACAAGTGTGATACTAAAAACAATGGCTGTAAATGTAACA  
TAAAGAAATGTAAAGGTTTATACTTGATCCCCAGGAAACGAAATATAAAATTTCGAAAAAT  
ATAAAATACGAAATTCATAAAGAGTGTACATAGGCTGTCCCAAAGTATCCAGACTGGTT  
CAGTAACTTCAAACTACGATAGATACAGACATGATCTTGGTCTCATTTTAAAGATCAAC  
TCAATACCTATCGATTAAAGACCAAGGTCAGCACAATCGAATAAAAATTGACCGAGTTATG  
GCAATGTGAAATCAGTGAGTA

>41\_MITE\_CAND\_10050-BTMAR2.82.9

TAACCTCAAAAGTAAGATAGATACAGACATGATTTTGGTCTTATTTTAAAGATCAACTCAA  
TACCTATCGATTAAAACCAAGATCAGCTCAATCGAATAAAAATTGACCGAGTTATGACAA  
TTTGAAGTTA

>42\_MITE\_CAND\_78021-BTMAR2.82.9

TATGTCACCTTTTTGTGCTAGCGGGGGCTCGAATCTCGCAGTGGACAGTTAATTTTTACTG  
GTTGTATTGAATGTTTTAGACCAATCATCTAACAATAATTAATACTTGGCAACTTAGGAAG  
CACATAGGTCCCTTATGATGCGTATTCGGGCATATGTGTAGAGTAAAAATATCATACGTAG  
GGTGTCCCAATAGTACCGGGACTGGTTCTGTAACCTTCAAAAGTAAGATAGATACAGACAT  
GATTTTGGTCTCATTTTAAAGATCAACTCAATACCTATCGATTAAAACCAAGATCAGCTCA  
ATCGAATAAAAATTGACCGAGTTATGACAATTTGAAATTAGTGAGGAAAGTTTACCCCTA  
CGGTTTTTAGGAAGATTTTTCGCTTACCAGCATTCAAAAAGTGAATA

>43\_MITE\_CAND\_49450-BTMAR2.82.9

TAGGCGTAAACTTTCCTCCCTGATTTCAAATTGCCATAACTCGGTCAATTTTTATTTCGATT  
GAGCTGATCTTGTTTTAATCGATAGGTATTGAGTTGATCTTTAAATGAAATCAAGATCA  
TGCTGTATCTATCTTACTTTCGAAGTTACAGAACCAGTCCCGGTACTTTTGGGACACCTT  
ATGTATATTTTACGCCGAAAAAGCGAACCTGAAACTTAAATGCGTTAACTTCCGAAAACT  
ATATATAATCCAACGAAAAATAAATAATTGGTACATAACAGCTTTCTTGATGCAAAGAAAA  
TAATTAATAATGTAAAAAAGAGATGTCAACACAAAATTACATAGCCCCTTCAATTCGGA  
AGATACTACAAACGAACTATACCTTAACATTTTCATATCCCATAGTTAACGTTCCCATGA  
CGAATATTGCTATCGCTAGCGATTGCAAAATCCAACCTGTTTTTTTTTACGCCTA

>44\_MITE\_CAND\_71755-BTMAR2.82.9

TACATAGGGTGTCCCAAAGTACCGGGACTGGTTCTGTAACCTTCGAAACAAAGATAGAT  
ACAGACATGAAGGAAGTAATGATTCGGAGGAAAGCGGATACGCAAATTAACCTTTTTGAA  
TTCTGGTAAGGGAAAAATCTTCCTAAAAAACCGTAGGGGTAAACTTTTCTCACGGATTT  
CAAATTGCCATAACTCGGTCAATTTTTATCAGATTGAGCTGATCTTGTTTTAATCGATAG  
GTATGGAGTTGATCTTTAAATGAAACCAAGATCATGTCTGTATCTATCTAAGTTTCGAAG  
TTACAGAACCAGTCCCGGTACTTTTGGGACACCCTATGTA

>45\_MITE\_CAND\_401437-BTMAR2.82.9

TAAACTTTCCTCGCTGATTTCAAATTGTCATAACTCGGTCAATTTTTATCCGATTGAGCTG  
ATCTTGTTTTAATCGATAGGTATCGAGTTGATCTTTAAATGAAATCAAGATCATGTCTGT  
ATCTATCTTACTTTCGAAGTTACAGAACAAGTCCCGGTGCTTTTGGGACACCTTATGTATA  
CTTTAAGCGAAAAAGCGAACCTGAAACTTAAATGCGTTAACTTCCGAAAACCATAAATA  
ATCCAACGAAAAATAAATAATTGGTACATAACAGCTTTCTTGATGCAAAGAAAAATAATTA  
AAAATGTAAAAAAGAGATGTCAACACAAAATTACATAGCCCCTTCAATTCAGAAGATA  
CTACAAACGAACTGTACCTTAACATTTTCATATCCCAGAAGCTAACGTTCCCATGACGAA  
TATTGCTATCGCTAGCGATTGCAAAATCCAACCTTGTTGATCAATTACGTTTGTTTCACATT  
TGAATAAGATTCCCATAGCTACTTTCATGTGAATTTCTGAGGAAATTTTA

>46\_MITE\_CAND\_142877-BTMAR2.1

TACGAGGGGCGTTCAATAAGTAAGTATCCCCCTCTCTAAAATCAATAGGAATGGACCAA  
TTTTCAAAAACCTGGGCTGAAAATCTTCCTTAGGATATTCTGAGTTCAACAAAACAAAC

CGCAACAAAATCGGACCATGTGCGGCCGAACGCGAGCCGTTTGAACGCGCCGAGGTGC  
ACACCGCTCCCGCCAAATCCGCGGAAATTTGAAGTCCGCGACAAGAGAAGAGCTTCCC  
TGCCAACGCTTCAGTCGTTTCATCACTGACGAAAAATCAAAGAAGTTTTTGTAGAATAAA  
GGGCTTACCTCACCTCTCCACATAACCAGCTCGATCCAAGCAGGTCTGATACTGATTGTG  
AGACTAAGAGAACAGCTTTTGGATACCACGCGTGTAGAGGTCTTCAACTGGCTGGGGA  
TGAAAGTGTTGACGGCTTGTTTGACCTCTTCCGCTGATTCAAATGAACTCCCCCAGTTC  
AGATTTTCAGAGAAAGGAATAAATAGTGGTCTATTTTGCTATTTATTACCGTATTTTTTCGTC  
AGTGATGAGCGACTGAAGCGTTGGCAGAGAGGCTCCTCTCTTGTGCGGACTTCAAATT  
TCCGCGGATTTGGCGGGAGCGGTGTGCCCTCGGCGCGTTCAAACGGCTCGCGTTCGG  
GCGCACATGTCCGATTTTGTTGCGGTTTGTGTTTGTGAACTCAGTATATCCTAAGGAAGAT  
TTTGAGCTCAAGTTTTTTGAAAATTGGTACATTCTTATTGATTTTAGAGAGGGGGGATACTT  
ACTTATTGAACGCCCCCTCGTA

>47\_MITE\_CAND\_481298-BTMAR2.1

TAATCACGCATGATTAAACGCAAAATGAAAGAATATCGATAGTGAGTTAAGGAAGGGGTA  
ACTAGCACCTTATAGGCCCGTTTTTTGGTTGTTCTTGCACCCATCGATCCAGAGGCCTGA  
CTTAAGTCGGAAAAAAAGGTTTTTCGACCTCGAGCCGTTACCTATCTATATTCTTTCGCTA  
CCACAGCATAGTCCAGGGGACGTACGAGGGGCGTTCAATAAGTAAGTATCCCCCCTCT  
CTAAAATCCATAAGAATGGACCAATTTTAAAAAACTTGGGCTCAAATCTTCCTTAGGAT  
ATTTTGAGTTCAACAAAACAAACCGCAACAAAATCGGACTATGTGCGGCCGAACGCGA  
GCCGTTTGAACGCGCCGAGGTGCTCGACGCTCCCGCCGAATCTGCGAGGATTTGAAGTC  
CGCTACAGGAGAAGAGCTTCTNAATGTCAAAGGAAATCGACAAGCCCAGCGTGTATGG  
AAACCGCGTTTTTGAGAAAAACGCATTTAAAGTTTTGTTTTTGATGCACTGCGCAGACTTT  
TCTATGCAGGCACCCTGTTTTTGGTGTTTTTGGTTGACCCAACCCTTCTATTGAAGGATAC  
CGGGTAGATTTTGCGATACATTTTGGGTTTATACTCTCATACATTTAATTTAAAAAAGCGG  
TTTAGGTATAGGCCATTATTACGCCCAACAGTCATTTCCGGTGGCAATATGAAGTATAAATC  
ATTTTAATCACGCATGATTA

>48\_MITE\_CAND\_714227-BTMAR2.1

TACGAGGGGCGTTCAATAAGTAAGTATCCCCCCTCTCTAAAATCCATAAGAATGGACCAA  
TTTTAAAAAACTTGGGCTCAAATCTTTCTTAGGATATTTTGAGTTCAACAAAACAAACC  
GCAACAAAATCGGACTATGTGCGGCCGAACGCGAGCCGTTTGAACGCGCCGAGGTGCT  
CGACGCTCCCGCCGAATCTGCGAGGATTTGAAGTCCGCTACAGGAGAAGAGCTTCTCTG  
CCAAAGCCTCAGTCGTTTCATCACTGACGAAAAATCAAAGAAATTTTTGTAGAATAACGG  
GCTTACCTCACTTCTCCACGTAACCAGCTCGATCCAAGCAAGTCTGATACTGAGACTAA  
GACTAAGAGAACAGCTTTTGGATGCCTCGTGCGTGGGAGTCTTTCAGCTGACCGCGGAT  
GAAAGAGTGGACGGCTTGTTTGACCTCTTCCACTGATTCAAATTAATCCTCCGAGTT  
CAGATTTTCAGGAACGGGAATAAATGGTGGTCTGGTTTGCCATTTATTTCTTTGATTTTTCG  
TCAGTGATGAACGACTGAGGCTTTGGCAGAGAAGCTCTTCTCCTGTAGCGGACTTCAAA  
TCCTCGCAGATTCGGCGGGAGCGTCGAGCACCTCGGCGCGTTCAAACGGCTCGCGTTTG  
GCCGCACATAGTCCGATTTTGTTGCGGTTTGTTTTGTTGAACTCAAATATCCTAAGGAA  
GATTTTGAGCCCAAGTTTTTTAAAATTGGTCCATTCTTATGGATTTTAGAGAGGGGGGAT  
ACTTACTTATTGAACGCCCCCTCGTA

>49\_MITE\_CAND\_167636-BTMAR2.1

TAATCCTCCGAGTTCAGATTTTCAGATACGATAATAAATAGCAAACCAGACCACCATTTA  
TTCCCGTTCTTAAATCTGAACTTGGAGGAGTTAATTTTGAATCAGTGGAAGAGGTCAA  
ACAAGCCGTCCACTCTTTCATCCGCGGTCAGCTGAAAGACTTCCACGCACGAGGCATCC  
AAAAGCTGTTCTCTTAGTCTTAGTCTCAGTATCAGACTTGCTTGGATCGAGCTGGTTATG  
TGGAGAAGTGAGGTAAGCCCCGAATTTACAAAAATTTCTTTGATTTTTCGTCAGTGATG  
AACGATTAAGGCTTTGGCAGAGAAGCTCTTCTCCTGAAGCGGACTTCAAATCCTCGCGG  
ATTTGGCGGGAGCGTCGAGCACCTCGGCGCGTTCAAACGGCTCGCGTTCGGCCGCACAT  
GGTCCGATTTTGTTGCGGTTTGTTTCGTTGAACTCAAATATCCTAAGGAAGATTTTGAG  
CCCAAGTTTTTTTAAAATTGGTCCATTTTAATGGATTTTAGAGAGGGGGGATACTTACTTA  
TTGAACGCCCCCTCGTAATTACAAAAAGACTTAAGAACTTTCTATATGTTTAAATTACTCGA

CTCGTTTAAACAATGCTTTTTAAAAAAATATTTCTTAGCTGCAAATTTTCAGTTTTTTTTTTTT  
TTTTTTTTTTTTTTTTTTTTTTTTTTTTTTCAGTGAATTAATTATCCGAACAGGAGGAGTTA  
>50\_MITE\_CAND\_836705-BTMAR2.1  
TACGAGGGGCGTTCAATAAGTAAGTATCCCCCCTCTCTAAAATCAATAGGAATGGACCAA  
TTTTAAAAAACTTGGGTTCAAAATCTTTCTTAGGATATACTGAGTTCAACAAAACAAAT  
CGCAACAAAATCGGCGCGTTCAAACGGCTCGCGTTCGGCCGCACATGGTCCGATTTTGT  
TGCGGTTTGT TTTTGT TGA ACTCAGTATACCCTAAGGAAGATTTTGAGCCCAAGTTTTTTT  
AAAATTGGTTCATTCTATTGATTTTAGAGAGGGGGGATACTTACTTATTGAACGCCCTC  
GTA  
>51\_MITE\_CAND\_451964-BTMAR2.1  
TACGAGGGGCGTTCAATAAGTAAGTATCCCCCCTCTCTAAAATCAATAGGAATGAACCAA  
TTTTCAAAAACCTTGGGCTCAAAAACCTTCCTTAGGATATACTGAGTTCAACAAAACAAAC  
CGCAACAAAATCGGACCATGTGCGGCCGAACGCGAGCCGTTTGAAACGCGCCGAGGTGC  
ACACCGCTCCCGCCAAATCCGCGGAAATTTGAAGTCCGCGACAAGAGAAGAGCTTCTC  
TGCCAACGCTTCAGTCGTTCACTACTGACGAAAAATCAAAGAATTTTGTAAAATAAAG  
GGCTTACCTCACTTCTCCACATAACCAGCTCGATCCAAGCAGGTCTGATACTGATTGTGA  
GACTAATAGAACAGCTTTTGGATACCGCGCGTGTAGAGGTCTTTCAACTGGCTGGGGAT  
GAAAGTGTTGACGGCTTGTTTGACCTCTTCCGCTGATTCAATGAACCTCCCCCAGTTCAGA  
TTTCAGAAAAGGGAATAAATAGTGGTCTTTCTTGCCATTTATTACCGTAATTTTCGTCCGT  
GATGAACGACTGAAGCGTTGGCAGAGAGGCCCTTCTCTTGTCGCGGACTTCAAATTTCC  
GCGGAATTGGCGGGAGCGGTGTGCACTTCGGCGCGTTCAAACGGCTCGCGTTTGGCCG  
CACATGGTCTGATTTTGT TGC GGT TTTGT TTTGT TGA ACTCAATATATCCTAAAGAAGATTT  
TGAGCCCAAGTTTTTTGAAAATTGGTACATTCTTATTGATTTTAGAGAGGGGGGATACTTA  
CTTATTGAACGCCCTCGTA  
>52\_MITE\_CAND\_770870-BTMAR2.1  
TATTCCTCTTCTATAATCTGAACTCGGGGGAGCTCATTTTGAATCAGTGGAAGAGGTCA  
AACAAGCCGTCAACACTTTCATCCCCAGCCAGTTGAAAGACTTCTACAGGCGCGGTATC  
CAAAAGCTGTTCTCTTAGTCTCACAATCAGTTTCAGGCCTGCTTGGATCGAGCTGGTTAT  
GCGGAGAGGTGAGGTAAGCACCTTATTCTACAAAACCTTCTTTTGATTTTTCGTCAGTGA  
TGAACGACTGAAGCGTTGGCAGAGAAGCTCTTCTCTTGTTGCGGACTTCAAATCTCCGC  
GGATTCGGCGGGAGCGGTGTGCACCTCGGCGCGTTCAAACGGCTCGCGTTTCGGCCGCA  
CATGGTCCGATTTTGT TGC GGT TTTGT TTTGT TGA ACTCAGTATATCCTAAGGAAGATTTG  
AGCTCAAGTTTTTTTAAAATTGGTCCATTCTATCGATTTTAGAGAGGGGGAGATA  
>53\_MITE\_CAND\_601944-BTMAR2.1  
TACGAGGGGCGTTCAATAAGTAAGTATCCCCCCTCTCTAAAATCCATAAGAATGGACCAA  
TTTTAAAAAACTTGGGCTCAAAATCTTTCTTAGGATATTTTGAGTTCAACAAAACAAACC  
GCAACAAAATCGGACTATGTGCGGCCGAACGCGAGCCGTTTGAAACGCGCCGAGGTGCT  
CGACGCTCCCGCCGAATCTGCGAGGATTTGAAGTCCGCTACAGGAGAAGAGCTTCTCTG  
CCAAAGCCTCAGTCGTTCACTACTGACGAAAAATCAAAGAAATTTTGTAGAATAACGG  
GCTTACCTCACTTCTCCACGTAACCAGCTCGATCCAAGCAAGTCTGATACTGAGACTAA  
GACTAAGAGAACAGCTTTTGGATGCCTCGTGCGTGGAAGTCTTTCAGCTGACCGCGGAT  
GAAAGAGTGACGGCTTGTTTGACCTCTTCCACTGATTCAAATTAACCTCTCCAAGTT  
CAGATTTTCAGGAACGGGAATAAATGGTGGTCTGGTTTGCCATTTATTTCTTTGATTTTTCG  
TCAGTGATGAACGACTGAGGCTTTGGCAGAGAAGCTCTTCTCCTGTAGCGGACTTCAAA  
TCCTCGCAGATTCGGCGGGAGCGTCGAGCACCTCGGCGCGTTCAAACGGCTCGCGTTC  
GGCCGCACATAGTCCGATTTTGT TGC GGT TTTGT TTTGT TGA ACTCAAAATATCCTAAGGA  
AGATTTTGAGCCCAAGTTTTTTTAAAATTGGTCCATTCTAATGGATTTTAGAGAGGGGGG  
ATACTTACTTATTGAACGCCCTCGTA  
>54\_MITE\_CAND\_380188-BTMAR2.1  
TACGAGGGGCGTTCAATAAGTAAGTATCCCCCCTCTCTAAAATCCATAAGAATGGACCAA  
TTTTAAAAAACTTGGGCTCAAAATCTTCCTTAGGATATTTTGAGTTCAACAAAACAAACC

GCAACAAAATCGGACTATGTGCGGCCGAACGCGAGCCGTTTGAACGCGCCGCCCTCGT  
A

>55\_MITE\_CAND\_547091-BTMAR2.1

TATCTATATTCTTTTCGCTACCACAGCATAGTCCAGGGGACGTACGAGGGGCGTTCAATAA  
GTAAGTATCCCCCCTCTCTAAAATCCATAAGAATGGACCAATTTTAAAAAACTTGGGCT  
CAAAATCTTCCTTAGGATATTTTGAGTTCAACAAAACAAACCGCAACAAAATCGGACTAT  
GTGCGGCCGAACGCGAGCCGTTTGAACGCGCCGAGGTGCTCGACGCTCCCGCCGAATC  
TGCGAGGATTTGAAGTCCGCTACAGGAGAAGAGCTTCTNAATGTCAAAGGAAATCGAC  
AAGCCCAGCGTGTATGGAAACCGCGTTTTTGAGAAAAACGCATTTAAAGTTTTGTTTTG  
ATGCACTGCGCAGACTTTTCTATGCAGGCACCCTGTTTTTGGTGTTTTTGGTTGACCCAA  
CCCTTCTATTGAAGGATACCGGGTAGATTTTGCGATACATTTTGGGTTTATACTCTCATACA  
TTTAATTTAAAAAAGCGGTTTAGGTATAGGCCATTATTACGCCCAACAGTCATTTCCGGTGG  
CAATATGAAGTATAAATCATTTTAATCACGCATGATTAAACGCAAAATGAAAGAATATCGAT  
A

>56\_MITE\_CAND\_861453-BTMAR2.1

TACAAAAATTTCTTTGATTTTTTCGTCAGTGATGAACGACTAGGGGCTTTGGCAGAGAAGCT  
CTTCTCCTGTAGCGGACTTCAAATCCTCGCGGATTCGGCGGGAGCGTCGAGCACCTCGG  
CGCGTTCAAACGGCTCGCGTTCGGCCGCACATGGTCCGATTTTGTTGCGGTTTGTTTCGT  
TGAAC TCAAATATCCTAAGGAAGATTTTGAGCCCAAGTCTTTTAAAATTGGTCCATTTT  
AATGGATTTTAGAGAGGGGGGATACTTACTTATTGAACGCCCTCGTATAAGCGGAGGCT  
TCATCTTCACTAGAAAAGTCTTTACTGACTTTCTGAGGAACAGTTGGAAAAATGACAGT  
GGATGTTTGATCATTTTATGTATATATAAAGTTCCAGGAACACACGCGTTTGAGTCGAGAC  
AGGGAAC TTCGGTCGGTGCAACAACTCGCAACAGTTGCACCTAAGGCCTTGCTCTGA  
CGGCGCAACTCTGTTGAGGGAAATTGGCGCAACTGTTGAAGGAAGGAAGTGTCTCAA  
AATGTTTCACTTATAAGTGAACTTTCAAGGTCAGAAATCTGGAACCTCAACAGTTGTTT  
ACCTTCGATGTTTTGAATTGATAACGCTGGTTACACGTGAAGCGGGAGTGTATTACGGG  
TGTTTTATTTTCGGAGCGGTTATTATTCAGAAATATTTGTA

>57\_MITE\_CAND\_625650-BTMAR2.1

TAATTTTGAAC TCAATTGCACCCGGTCACGTGAGTCATAAGTCTCGCCCTCAGGCTTGACT  
TGGCGCTGCGGCGCGCTGTGCGTCGCAGCAAAGATTCCCTGTGGAAGCGTGGCTTTACA  
CAGTGCGCTCAATGATGGCGAAAACACGCATCTCTGACAGTAACGCATGGGTGCGGGTG  
CCAACAGCGGCATGCTTTATTGGCGCCGTCTTGTCACCGACTGATTACTCTTTTTCCTAGT  
ACTTTGTACGTATCAGAGAAATAGGATTCAACAAAGTATAAAGTTGTTTCTCCTGGAAAG  
TGGCGTGTTCAAATGAATGTAAATACGAGGGGCGTTCAATAAGTAAGTATCCCCCTC  
TCTAAATCGATTAGAATGGACCAATTTTAAAAAACTTGGGCTCAAATCTTCCTTAGG  
ATATTTTGAGTTCAACAAAACAAACCGCAACAAAATCGGACTATGTGCGGCCGAACGCG  
AGCCGTTTGAACGCGCCGAGGTGCTCGACGTTCCCGCCGAATCCGCGAGGATTTGAAGT  
CCGCTACAGGAGAAGAGCTTCTCTGCCAAAGCCTCAGTCGTTCATCACTGACGAAAAAT  
CAAAGAAATGTTTGTAGAATAAGGAGCTTACCTCACTTCTCCACATAAGCAGCTCGATCC  
AAGCAAGTCTGATACTGAGACTAAGACTAAGAGAACAGCTTTTGGATGCCTCGTGCGTG  
GAAGTCTTTCAGTTGACCGCGGATGAAAGAGTGGACGGCTTGTTTTGACCTCTTCCACT  
GATCAAATA

>58\_MITE\_CAND\_645163-BTMAR2.1

TACGAGGGGCGTTCAATAAGTAAGTATCCCCCTCTCTAAAATCCATAAGAATGGACCAA  
TTTTAAAAAACTTGGGCTCAAATCTTTCTTAGGATATTTTGAGTTCAACAAAACAAACC  
GCAACAAAATCGGACTATGTGCGGCCGAACGCGAGCCGTTTGAACGCGCCGAGGTGCT  
CGACGCTCCCGCCGAATCTGCGAGGATTTGAAGTCCGCTACAGGAGAAGAGCTTCTCTG  
CCAAAGCCTCAGTTGTTCACTACTGACGAAAAATCAAAGAAATTTTTGTAGAATAACGG  
GCTTACCTCACTTCTCCACGTAACCAGCTCGATCCAAGCAAGTCTGATACTGAGACTAA  
GACTAAGAGAACAGCTTTTGGATGCCTCGTGCGTGGGAGTCTTTCAGCTGACCGCGGAT  
GAAAGAGTGGACGGCTTGTTTGACCTTTTCCACTGATTCAAATAACTCCTCCGAGTTC  
AGATTTCAAGGAACGGGAATAAATGGTGGTCTGGTTTGCCATTTATTTCTTTGATTTTTCGT

CAGTGATGAACAACTGAGGCTTTGGCAGAGAAGCTCTTCTCCTGTAGCGGACTTCAAAT  
CCTCGCAGATTCGGCGGGAGCGTCGAGCACCTCGGCGCGTTCAAACGGCTCGCGTTCCG  
GCCGCACATAGTCCGATTTTGTGCGGTTTGTGTTGTTGAACTCAAAATATCCTAAGGAA  
GATTTTGAGCCCAAGTTTTTTAAATTTGGTCCATTCTTATGGATTTTAGAGAGGGGGGAT  
ACTTACTTATTGAACGCCCCCTCGTA

>59\_MITE\_CAND\_476094-BTMAR2.1

TATTTGACCTGCTCATCTGTGAAACTTTGCTTTGATGATTAAAAACAAAGGTCAACGAAT  
GGACTATCAAAAGCTACTTACGAGGGGGCGTTCAATAAGTAAGTATACCCCCTCTCTAAAA  
TCCATTAGATGGACCAATTTTAAAAAACTTGGGCTCAAAATCTTCCTTAGGGTATTTTGA  
GTTCAACAAAATAAACCGCAACAAAATCGGACCATGTGCGGCCGAACGCGAGCCGTTT  
GAACGCGCCGAGGTGCACACCGCTCCCGCCAAATCTGCGGAAATTTGAAGTTCGCGAC  
AAGAGAAGAGCTTCTCTGCCAACGCTTCAGTCGTTTCATCACTGACGAAAAATCAAAGA  
AGTTTTTGTAAGAATAAAGGGCTTACCTCACCTCTCCACATAACTAGCTCGATCCAAGCAG  
GTCTAATA

>60\_MITE\_CAND\_743663-BTMAR2.1

TACGAGGGGCGTTCAATAAGTAAGTATCCCCCTCTCTAAAATCAATAGAAATGGACCAC  
TTTTCAAAAACCTTGGGCTCAAAATCTTCCTTAGGATATACTGAGTTCAACAAAACAAACC  
GCAACAAAATCGGACCATGTGCGGCCGAACGCGAGCCGTTTAAACGCGCCGAGGTGCA  
CACCGCTCCCGCCAAATCCGCGGAAATTTGAAGTCCGCGACAAGAGAAGAGCTTCTCT  
GCCAACGCTTCAGGCGTTTCATCACTGACGAAAAATCAAAGAAGTTTTTGTAAGAATAAAG  
GGCTTACCTCACCTCTCCACATAACCAGCTCGATCCAAGCAAGTCTGATACTGATTGTGA  
GACTAAGAGAACAGCTTTTGGATACCACGCGTGTAGAGGTCTTTCAACTGGCTGGGGAT  
GAAAGTGTTGACGGCTTGTTTGACCTCTTCCGCTGATTCAAAATGAACTCCCCCAGTT  
CAGATTTTCAAAAAATGAATAAATAGTGTTTTTTTTTGCCATTIATTATGGTATTTTTTCGTCA  
GTGATGAGCGACTGCAGCGTTGGCAGAGAGGCTCTTCTCTTGTGCGGACTTCAAATTT  
TCGCGGATTTGGCGGGAGCAGTGTGCACCTCGGCGCGTTCAAACGGCTCGCGTTCCGGC  
CGCACATGGTCCGATTTTGTGTCAGTTTGTGTTTGTGTTGAACTCAGTATATCCTAAGGAAGAT  
TTTGAGCCCAAGTTTTTTGAAAATTGGTACATTTTTTATTGATTTTAGAGAGGGGGGATACTT  
ACTTATTGAACGCCCCGTCGTA

>61\_MITE\_CAND\_193732-BTMAR2.1

TACGAGGGGCGTTCAATAAGTAAGTATCCCCCTCTCTAAAATCAATAGGAATAAACCAA  
TTTTTAAAAACTTGGGCTCAAAATCTTTCTTAGGATATACTGACAATGAGTTCAACCAA  
CAAACCGCAACAAAATCGAACCATGTGCGGCCGAACGCGAGCCGTTTGAACGCGCCGA  
GGTGCACGCCGCTCCCGCCGAATCCGCGGAAATTTGAAGTCCGCGACAAGAGAAGAGC  
TTCTCCGCCAACACTTCAGTCGCTCATCACTGACAAAAAATCAAAGAAGTTTTTGTA  
ATAGGGGGCTTACCTCACCTCTTCACATAACCAGCTCGATCCAAGCAGGTCTGATACTGA  
TTGTGAGACTAAGAGAACAGCTTTTGGATACCACGCGTGCAGAAGTCTTTCGACTGGCT  
GGGGATGAAAGTGTTGACGGCTTGTTTGACCTCTTCCACTGATTCAAAATGAACTCCCC  
CGAGTTCAGATTTTCAAGAAAGGAATAAATGGTGGTCTGTATTGCCATTTATTACCGTATA  
TTTATGTATTCCTACGTACGTTATTTCCTATTGATTTTAGAGAGGGGGGATACTTACTTATTG  
AACGCCTCTCGTA

>62\_MITE\_CAND\_163418-BTMAR2.1

TACGAGGGGCGTTCAATAAGTAAGTATCCCCCTCTCTAAAATCCATAAGAATGGACCAA  
TTTTTAAAAAACTTGGGCTCAAAATCTTCCTTAGGATATTTTGAGTTCAACAAAACAAAC  
CGCAACAAAATCGGACCATGTGCGGCCGAACGCGAGCCGTTTGAACGCGCCGAGGTGC  
TCGACGCTCCCGCCGAATCTGCGAGGATTTGAAGTCTGCTACAGGAGAAGAGCTTCTCT  
GCCAAAGCCTCAGTCGTTTCATCACTGACGAAAAATCAAAGAATTTTTTGTAAGAATAAGG  
GGCTTACCTCACTTCTCCACATAACCAGCTCGATCCAAGCAAGTCTGATACTGAGACTAA  
GACTAAGAGAGTAGCTTTTGGATGCCTCGTGCGTGGAAGTCTTTCAGCTGACCGCGGAT  
GAAAGAGTGACGGCTTGTTTGACCCCTTCCACTGATTCAAAATTAATCCTCCAAGTT  
CAGATTTTCAAGAACGGGAATAAAGGATGGTCTGGTTTGCCATTIATTATCGTACCGTAGT  
ATCGATGAACGACTGAGGCTTTGGCAGAGAAGCTCTTCTCCTGTAGCGGACTTCAAATC

CTCGCAGATTTCGGCGGGAGCGTCGAGCACCTCGGCGCGTTCAAACGGCTCGCGTTTCGG  
CCGCACATGGTCCGATTTTGTTCGGTTTGTGTTTGTGAACTCAAATATCCTAAGGAAG  
ATTTTGAGCCCAAGTTTTTTTAAAATTGGTCCATTCTTATGGATTTTAGAGAGGGGGGATA  
CTTACTTATTGAACGCCCCCTCGTA

>63\_MITE\_CAND\_699593-BTMAR2.1

TACGAGGGGCGTTCAATAAGTAAGTATCCCCCCTCTCTAAAATCAATAAAAATGGACCAA  
TTTTAAAAAATACTTGGGCTCAAAATCTTCTTAGGATATACTGAGTTCAACAA  
AACAAACCGCAACAAAATCGGACGGCTTGTTTGACCTCTTCCACTGATTCAAAATTAAC  
TCCCCCGAGTTCAGATTTTCAGAAACGGGAATGAATGTTGGTCCGTTTGCCATTTAGTAT  
CGTATCTCAAATATGAACTCGGAAGAGTTAATTCTGAATCAGTGGAAGAGGTCAAACAA  
GCCGTCCACTCTTTCATCCCCGGTCAGCTGAAAGATTTCTACCCGCGGGGCATCCAAAA  
GCTGTTCTCTTAGTCTATCAGACCTGCTTGGATCGAGCTGGTTATGTGGAGAAGTGATGT  
AAATCCCTTATTCAACAAAAAATTATTTGATTTTTTCGTCAGTGATGAACGACTGAGGCTT  
TGGCAGAGAAGCTCTTCTCCTGTTCGCGGACTTCAAATCCCGCGGATTTCGGCGGGAGCGT  
CGAGCGCCTCGGCGCGTTCAAACGGCTCGCGTTTCGGCCGCATATAGTTTCGATTTTGTTC  
GGTTTGTGTTTGTGAACTCAGTATATCCTAAGAAAGATTTTGAGCCCAAGTTTTTTTAAA  
ATTGATCCATTTTTTATTGATTTTAGAGAGGGGGGATACTTACTTATTGAATGCACCTCGTA

>64\_MITE\_CAND\_20561-BTMAR2.1

TAGAATGAACCAATTTTAAAGAACTTGGGCTCAAAATCTTCCTTAGGATATTTTGAGTTC  
AAAAAAACAAACCGCAAAAAAATCGGACCATGTTTCGGCCGAACGCGAGCCGTTTGAAC  
GCGCCGAGGTGCTCGACGCTCCCGCCGAATCCGCGAGGATTTGAAGTCCGCTACAGGA  
GAAGAGCTTCTCTGCCAAAGCCTCAGTCGTTTCATCACTGACGAAAAATCAAAGAAATTT  
TTGTAGAATAAGGGGCTTACCTCACTTCTTCTCCACATAACCAGCTCGATCCAAGCAAGT  
CTGATACTGAGACTAAGAGAACAGCTTTTGGATGCCTCGCGCGTGGAAGTCTTTCAGCT  
GACCGGGGATGAAAGAGTGGACGGCTTGTTTGACCTCTTCCCCTGATTCAACATTAAC  
CCTCCGAGTTCAGATTTTCAGATACGATAATAAATGGCGTAGCGGACTTCAAATCCTCGCG  
GATTCGGCGGGAGCGTCGAGCACCTCGGCGCGTTCAAACGGCTCGCGTTTCGGCCGAAC  
ATGGTCCGATTTTGTTCGGGTTTGTGTTTTTTGAACTCAAATATCCTAAGGAAGATTTTGA  
GCCCAAGTTTTTTTAAAATTGGTCCATTCTA

>65\_MITE\_CAND\_71385-BTMAR2.1

TACGAGGGGCGTTCAATAAGTAAGTATCCCCCCTCTCTAAAATCCATTAGAATGGACCAA  
TTTTAAAAAATACTTGCACTCAAAATCTTCCTTAGGATATTTTGAGTTCAACAAAACAAAC  
CGCAACAAAATCGGACCATGTCCGGCCGAACACGAGCCGTTTGAACGCGCCGAAGTGC  
TCGACGCTCCCGCCGAATCTGCGAGGATTTGAAGTCCGCTACAGGAGAAGAGCCTCTCT  
GCCAAAGCCTCAGTCGTTTCATCACTGACGAAAAATCAAAGAAATTTTTGTAGAATAAGG  
GGCTTACCTCACTTCTTCACATAACCAGCTCGATCCAAGCAAGTCTGATACTGAGACTAA  
GAGAACAGCTTTTGGATGCCTCGCGCGTGGAAGTCTTTCAGCTGACCGGGGATGAAAG  
ACTTCCACGCGCGAGGCATCCAAAAGCTGTTCTTCTTCCAAAAGCTCTTCTCCTGTAGC  
GGACTTCAAATCCTCGCAGATTTCGGCGGGAGCGTCGAGCACCTCGGCGCGTTCAAACG  
GCTCGCGTTTCGGCCGGACATGGTCCGATTTTGTTCGGGTTTGTGTTTGTGAACTCAAAT  
ATCCTAAGGAAGATTTTGAGCGCAAGTTTTTTTAAAATTGGTCCATTCTACTGGATTTTAG  
AGAGGGGGGATACTTACTTATTGAATGCCCTCGTA

>66\_MITE\_CAND\_36287-BTMAR2.12

TAATTCGGTTAAATACTCGACTTTAACTACGAGGGGCGTTTCGTAAAGTAAGTATATATCT  
TTATTTTCTCCGGAATTA

>67\_MITE\_CAND\_850192-BTMAR2.9

TAATCGATAGAAACATGTTGAAATCAACCAGATGAGCAAACCATTTGCAAAGCATACTTAT  
CTTCATGGTTCTTTAACTTTGGTTTCGATTTATGGAGGGTTTTAGGATATTATATAGCTCAA  
AGAATTTAGCAGTAGATTTTAGAATTAAACAAGTTGGATTTTGCAATCGCTAGCGATAGC  
AATATTCGTCATGGGAACGTTAGCTTCTGGGATATGAAAATGTAAAGGTACAGTTCGTTT  
GTAGTATCTTCTGAATTGAAGGGGCTATGTAATTTTGTGTTGACATCTCTTTTTTAAACATTT  
TTAATTATTTTCTTTGCATACAAGAAAGCTGTTATGTACCAATTATTTATTTTCGTTGGATTA

TATATGGTTTTTCGGAAGTTAACGCATTAAAGTTTCAGGTTTCGCTTTTTTCGGCGTGAAGTGT  
ACATAAGGTGTCCCAAAAGCACCGGGACTTGTCTGTAACTTCGAAAGTAAGATAGATA  
CAGACATGATCTTGATTTTCATTTTAAAGATCAACTTAATACCTATCGATTA

>68\_MITE\_CAND\_884001-BTMAR2.9

TAGATATCAATCTCGTCAATGAAGAATCTTCCTTAAAAACCGTAGGGGTAAAGTTTACTC  
AATAATTTCAAATTGCCATAACTCGGTCAATTTTTATCCAATTGCGCTGATCTTGGTCTTAA  
TCGATAGATATTGAGTTGATCTTAAAAATGAAACCAAGATCATGTCTGCATCTATCATAGT  
TTAGAAGTTACAGAATCAGTCCGGGTACTTTTGGGACAGCCTATGTATAATTCTGAGACA  
AGCTTTTTGTGCCTTCAGTATTTTATCCACCCCTGTGGAGTTGCTCAGAGATAGATTCCAT  
ACTGATGATTCATCGAGTGGATACTTGGATAGTTATATCTCACCATTAACATTTGAGTTCAC  
CTCTCTCTTCATTTTTCTAAGTAGCCAGATTCGTGACAGATTTTCTTGCTAGTCTTCGACA  
TGTGATTTAACCATTTTAATTGATTATTGTCAAATACCCTTGATATCTA

>69\_MITE\_CAND\_432892-BTMAR2.9

TATCGATTAACCAAGATCAGCTCAATCGGATAAAAATTGACCGAGTTATGGCAATTTG  
AAATCAGCGAGGAAAGTTTACGCCTACGGTTTTTAAGGAAGATTCTTCATCGCCGTAAAT  
CGAAAAGTCGGCCGATAAAGTGATGCTTATTGTGTTTTTTTATTTTCGAGGTGTCATTTAT  
CAACATTTTGTACCATCAAACACAACAGTTGACAGTGCCTATTATTGCAAAGTACCGAA  
GGAGTTGAGAATGCACATTTCCCGGAAACGGTCGGACTCGAAAGCTTCGTGGATACTCC  
ATCAAGACAATGCGCGGCCTCACACATCGAGCTTAACACGTGAATTTATGAGTAAAAAT  
GGAGTTGAAACAATCCCTCATCCCCCTAATAGCGCTGACTTGGCTCCATGTGATTTTTGG  
ATGTTTCCACGCTTAAAAAGGAGCTTCGCGGACGAAGATTCGTATCGAAGACCGAAAT  
CCAGAATGCAATTCAAACTTCTTCAACTCCATCCCAGAGGAAGAATTCAGGAAAACAA  
TGTTGGATAAGTGGCAAGAGCGCATGAAAAAGTGCATCCGGTTTGATGGACGGTACTTT  
GAAAAGCAAAAGGAAATTATGGAAGATTCGAAGGAAAGTGGATACGAATATTAACTTTT  
TGAATCCTGGTAAGCGAAAAATCTTCCTAAAAACCGTAAGGGTAACTTTCTCACTAAT  
TTCAAATTGTCATAACTCGGTCAATTTTTATTTCGATTGAGCTGATCTTGATTTAATCGATA

>70\_MITE\_CAND\_80902-BTMAR2.9

TACATAGGCTGTCCCAAAAGCACCCGGACTGGTTCTGTAACTTCAAAATTATGATAGACA  
AAGACATGATCTTGGTCTCATTTTAAAGATCAACTCAATATCTATCGATTAAAACCAAGAT  
CAGCGAAATAAAATAAAAATTGACCTATAATAGTTATGGCAATTTGAAATCAGTGAGTAA  
AGTTTACCCCTACGGTTTTTAAGGCAGATTCTTCATCGACGATATTGATATCTAAAAGTAT  
GTTCTGGTATTGAGTTCTCATCCAAAACTTCCATGTAATGCTTGGACAAAGATTCTGAAT  
CGAGGACCGAAATCCAAAATGCAGTTCAGAACTTTCTCAACTCCATCCCAGGGAAAGA  
ATTCAGGAAAACAATGTTAGAGAAGTGGCAAGAGCACATGAGTAAGTGCATCCGGTTTA  
ATGGCCGGTATTTTGAAGCAAAAGGAAGTTATGGAAGATTCGGAGGAAAGCGGAAA  
CAAAGATTAACTTTTTGAATCCTGGTAAGCGAGAAATCTTCCTTAAAAACCGTAGGGGTAA  
AACTTTACTCATGGATTTCAAATTGCCATAACTAGGTCAATTTTTATTTCGATTGAGCTGAT  
CTTGGTCTCAATCGATAGAAATTGAGTTAATCTTTCAAATGAAATCAAGTGCATGTCTGTA  
TCTATCGTAGTTTTGAAGTTACAGAACCAGTCCGGGTACTTTTGGGACAGCCTATGTA

>71\_MITE\_CAND\_119775-BTMAR2.9

TATCGATTAACCAAGATCAGCTCAATCGGATAAAAATTGACCGAGTTATGGCAATTTG  
AAATCAGCGAGGAAAGTTTACGCCTACGGTTTTTAAGGAAGATTCTTCATCGCCGTAAAT  
CGAAAAGTCGGCCGATAAAGTGATGCTTATTGTGTTTTTTTATTTTCGAGGTGTCATTTAT  
CAACATTTTGTACCATCAAACACAACAGTTGACAGTGCCTATTATTGCAAAGTACTAAAG  
GAGTTGAGAATGCACATTTCCCGGAAACGGTCGGACTTGAAAGCTTCGTGGATACTCCA  
TCAAGACAATGCGCGGCCTCACACATCGAGCTTAACACGTGAATTTATGAGTAAAAATG  
GAGTTGAAACAATCCCTCATCCCCCTTATAGCCCTGACTTGGCTCCATGTGATTTTTGGAT  
GTTTCCTACGCTTAAAAAGGAGCTTCGCGGACGAAGATTCGTATCGAAGACCGAAATCC  
AGAATGCAATTCAAACTTCTTCAACTCCATCCCAGAGGAAGAATTCAGGAAAACAATG  
TTGGATAAGTGGCAAGAGCGCATGAAAAAGTGCATCCGGTTTGATGGACGGTACTTTGA  
AAAGCAAAAGGAAGTTATGGAAGATTCGGAGGAAAGTGGATACGAATATTAACTTTTTG

AATCCTGGTAAGCGAAAAATCTTCCTAAAAACCGTAGGGGTAAACTTTCCTCACTAATT  
CAAATTGTCATAACTCGGTCAATTTTTATTGATTGAGCTGATCTTGGTTTTAATCGATA
