# Supplementary material
Source: publisher figshare collection journal article supplement (https://gsajournals.figshare.com/articles/dataset/_/15001164)
Supplement: Supplementary file 4 [file 1]

<sup>1</sup> TACGAGGTCTGTTAGATTAGAAACCGGATTTTGGTGATAACAGGCGCATCCTGCGTCC 60  
 GAATGCAATTTTCTTGACTTATCAGAAAGCTGATAATCTACTAAAGAAGACTACGTTCA 120  
 CAGATCTAGATTATCTCAATTAGTAATCATTTGGTGACAGGTTGAAGTTGGGTAAGTCAG 180  
                                           M R L L L E Q R Y N I K F  
 TACCGTTTTGCGATTTTCACCATGCGGTTACTTTTAGAGCAACGGTACAACATTAAGTTT 240  
 C Y K L G I P C T E T F D M L Q K V Y E  
 TGTTATAAACTCGGTATTCCTTGTACCGAACTTTTGATATGTTACAGAAAGTTTACGAG 300  
 G T C M S R T Q C Y E W F **K R F K** S G Q  
                                                                                           Bipartite nuclear localization signal  
 GGCACCTGTATGAGTCGCACTCAGTGTATGAGTGGTTCAAAAGGTTTAAAGTGGTCAG 360  
 E S V E D N V H G **I R P S** I A T D I C H  
 GAGTCTGTTGAAGATAACGTTACGGGATTCGTCCTTCAATAGCGACTGACATTTGTCAT 420  
 V E E V R H K V L E N G R L T V R E L S  
                                                                                           Helix-Turn-Helix  
 GTGGAGGAGGTGCGGCACAAAGTGCTTGAAATGGCCGTTTAACAGTTCGTGAACCTTTCC 480  
 E E C H I S T F S V Y I I L T E H L D M  
 GAAGAGTGTCAATTTCACTTTTTCCGTTTACATAATTTTAACGGAGCATTTAGACATG 540  
 R R V A A K L V P R L L T I E Q K T N R  
 CGTCGAGTCGCAGCAAACTTGTACCGCGGTTACTGACAATTGAGCAAAAAACCAATCGA 600  
 V S I C Q D L L S R S I E D P N F V N R  
 GTCTCAATTTGCCAGGATCTTCTCAGCCGTTCAATTGAGGACCCAAATTTTGTAACCGA 660  
 I I T G D E S W V Y G Y D M E T K A Q S  
 ATAATTACTGGTGATGAATCGTGGGTTTATGGTTACGACATGGAAACAAAAGCCCAATCA 720  
 S Q W V E K P G V R P K K A R Q V R S K  
 TCCAGTGGGTTGAAAAACCAGGCGTGAGACCGAAAAAGGCGCGACAAGTTCGGTCAAAA 780  
 T K V M L T V F F D S Q G V V H K E F L  
 ACCAAAGTCATGTTAACTGTGTTTTTTGACAGTCAGGGTGTGTCCATAAGGAATTTT 840  
 P E G Q T V N R Y Y Y N D V L R R L R E  
 CCGGAAGGACAACTGTGAATCGCTATTACTATAACGATGTGTTACGTAGATTACGTGAA 900  
 N V R R L R P E L W A Q N S W F L H H D  
 AATGTTTCGTAGATTAAGGCCTGAACCTTGGGCTCAGAATTCGTGGTTTCTGCATCAGCAG 960  
 N A P A H A S N Q I R E F C E K T G T N  
 AATGCCCTGCGCATGCATCGAATCAAATTCGAGAGTTTGTGAGAAAACAGGCACGAAT 1020  
 V L P H P P Y S P D L A P A D F F L F P  
 GTCCTACCTCATCCTCCATATTCACCGGACCTGGCACCTGCGGACTTTTTTCTATTCCCA 1080  
 K L K S V L K G R R F D T V A E I K E N  
 AAACCTAAATCAGTGTTAAAAGTCGTCGGTTTGATACGGTAGCAGAAATTAAGGAAAAT 1140  
 S L R D L R A I K P E E F Q K S F S K L  
 TCTCTGAGAGACTTGCGCGCAATCAAACCTGAGGAGTTCCAAAAGAGTTTCAGCAAATTG 1200  
 Q R R W Q K C I Q V G G H Y F E G D R I  
 CAGCGGCGTTGGCAGAAATGTATCCAAGTCGGAGGTCACCTATTTTGAAGGAGATAGGATC 1260  
 E V P E L \*  
 GAGGTGCCAGAGTTGTAGGTAATTACTTTGTAACAACTACAATCAATATTTTCTTTGTCA 1320  
 ATTTTGTCTAAAAACAATTTTTCGCGCACTCGATGTTATTTTTTCTGGAAAAATACAGA 1380  
 GAAATCGCAAAACGCACCTGACTTACTCAACTTCAACCTGTCACCAAATGATTATTAATT 1440  
 GAGATAATCTAAATCGGTGAACGTAGTCGTCTCCGTAGATTATCAGCTTCCAAAAAGT 1500  
 CCAAGAAAGTTGCATTCGGACGCAGGATGCGCCTGTTATCACCAAAATCCGGTTTCTAAT 1560  
 CTAACAGACCTCGTA 1573
