# Supplementary material
Source: publisher figshare collection journal article supplement (https://gsajournals.figshare.com/articles/dataset/_/15001164)
Supplement: Supplementary file 5 [file 1]

>Btmar1.1|gi|1092444870|gb|MAMS01004624\_1|:130789-132365|XM\_019054591.1|NW\_017551711.1|GeneID:109039198|LOC109039198| Bemisia tabaci isolate MEAM1 Scaffold26953, whole genome shotgun sequence 1577 bp|intron9=1948pb gene:cytosolic carboxypeptidase 2-like

TACGAGGTCTGTTAGATTAGAAACCGGATTTTGGTGATAACAGGCGCATCTGCGTCC  
GAATGCAATTTTCTGGACTTATCAGAAAGCTGATAATCTACTAAAGAAGACTACGTTCA  
CAGATCTAGATTATCTCAATTAGTAATCATTTGGTGACAGGTTGAAGTTGGGTAAGTCAG  
TACCGTTTTGCGATTTTCACCATGCGGTTACTTTTAGAGCAACGGTACAACATTAAGTTT  
TGTTATAAACTCGGTATTCCTTGTACCGAACTTTTGATATGTTACAGAAAGTTTACGAG  
GGCACTTGTATGAGTCGCACTCAGTGTTATGAGTGGTTCAAAGGTTTAAAAGTGGTCAG  
GAGTCTGTTGAAGATAACGTTACGGGATTCGTCCTTCAATAGCGACTGACATTTGTCAT  
GTGGAGGAGGTGCGGCACAAAGTGCTTGAAAATGGCCGTTTAACAGTTCGTGAACTTTCC  
GAAGAGTGTCATATTTCAACTTTTTCCGTTTACATAATTTTAACGGAGCATTTAGACATG  
CGTCGAGTCGCAGCAAACTTGTACCGCGTTACTGACAATTGAGCAAAAAACCAATCGA  
GTCTCAATTTGCCAGGATCTTCTCAGCCGTTCAATTGAGGACCCAAATTTTGTAACCGA  
ATAATTACTGGTGATGAATCGTGGGTTTATGGTTACGACATGGAAACAAAAGCCCAATCA  
TCCCAGTGGGTTGAAAAACCAGGCGTGAGACCGAAAAAGGCGCGACAAGTTCGGTCAAAA  
ACCAAAGTCATGTAACTGTGTTTTTGACAGTCAGGGTGTTGTCCATAAGGAATTTTAA  
CCGGAAGGACAACTGTGAATCGCTATTACTATAACGATGTGTTACGTAGATTACGTGAA  
AATGTTCTGATAGATTAAGGCCTGAACTTTGGGCTCAGAATTCGTGGTTTCTGCATCACGAC  
AATGCCCCCTGCGCATGCATCGAATCAAATTCGAGAGTTTTGTGAGAAAACAGGCACGAAT  
GTCCTACCTCATCCTCCATATTCACCGGACCTGGCACCTGCGGACTTTTTTCTATTCCCA  
AACTTAAATCAGTGTTAAAAGGTCGTCGGTTTGATACGGTAGCAGAAATTAAGGAAAAT  
TCTCTGAGAGACTTGCGCGCAATCAAACCTGAGGAGTTCCAAAAGAGTTTCAGCAAATTG  
CAGCGGCGTTGGCAGAAATGTATCCAAGTCGGAGGTCACCTATTTTGAAGGAGATAGGATC  
GAGGTGCCAGAGTTGTAGGTAATTACTTTGTAACAACTACAATCAATATTTTCTTTGTCA  
ATTTTGTCTAAAAACAATTTTTGCGCACTCGATGTTATTTTTCTGGAAAAATACAGA  
GAAATCGCAAAACGCACCTGACTTACTCAACTTCAACCTGTCACCAAATGATTATTAATT  
GAGATAATCTAAATCGGTGAACGTAGTCGTCTCCGTAGATTATCAGCTTTCCAAAAAGT  
CCAAGAAAGTTGCATTCGGACGCAGGATGCGCCTGTTATCACCAAATCCGGTTTCTAAT  
CTAACAGACCTCGTA

>Btmar1.2|gi|1092453208|gb|MAMS01000900\_1|:144985-146791  
gi|1092453208|gb|MAMS01000900.1|:144985-146791 Bemisia tabaci isolate MEAM1 Scaffold1218,  
whole genome shotgun sequence 1807 bp

TATTTTACGTAAACAAAAAATAGGGGGAGTTAGTGCACTGAGAGCACACGCTATCATGCA  
GAAAACTTTTGTACCAAAAGATAAACACATTCAAGACTCATGAGCTCTCTTGAATCTT  
GAGACAACATTCTGACGAATAAAAGAAGATCATCTCATGGAAGAACTCGAGAAGCAAAT  
TTTCTGTATACTTAGCCAAAAAGAAAGATCAGTTCTATCACTACAAACAAAAATAACACA  
TTTAAATAGAGGAAATAAAATAGAAAAAGTTATCTGTTTTTGACTTTTTTGTTAATCA  
AAATTAAGTGGAACTGTGAGTAGTATCTGGCATGGGAGTTGATTTTTATGTTTAGCATG  
AGATAAATCTTGTCTCTCCAGCATTTTGCAAAAAAAAAAAAAAAAAATTGTTTAGAGATAC  
TTGACCTCAAACCCAGCCCAATGAGACAGTATTGTTCACTATTTTACGAGGTATGATCCA  
TTAGAAACCGAACTTTGGCCATTGCGGGCCAACCAATGACCGGATCTGGGTTTTCTGGG  
TTTATCTGATTGCTGATAAACTGACAAACACGCTGCTTTTTACAGATTTCATTATCTTA  
ACTAGTTCGAATTTTACAGCCGCTTGATTGAGGTGTGTTCAAGTGCGTGTTGCGATTTTG  
AGAAATGCGTGAGCTTTTAGAACAACGGTGTAACATTAAATTTTGTCTAAGTTGGGTAA  
AACGTTTTCCGAACTTTTGCACTGTTAACGAGAGTTTAAAAGATAAGTGTTTAAGTCG  
GACTCAGTGTTACGAATGGTTTAAGAGATTTAAAAACGGTCAGGAATCGGTGGAAGATGA  
GGTTCATGAAGTCAAACCCAGGACGTCAACTGACGAGATTCACATGAATCAAGTTCGCGA  
AAAAGTGCAAACCGACGACCGTTTAACCATTCGTGAGCTTTCAGAGGAACTGAATATTTT  
TTTTGGGTCCGTTGAGAGAATTTCAACCCAAAATTTGAACATGCGTAGAGTTTCTACGAA  
GTGAATTCCCAAGTTGTTAATCCAAGCGCTAGAAGAAAAGCGCGTTTTTCATCTGCCAACA  
GCTGCTGGACCGCTCAAATGCTGATGCAGATTTTAAAGTAAAATTGTCACCGGTGATGA  
AACTTGGGTCTATAGTTATGATGATGAAACCAAGGCCAGTCATCTCAGTAGCTGGAAAA  
AGGTGCCCCGAGGCCCAAAAAAGGCCAAAGTCACTCGAAAACAAGTTTTGTTGACAGTTT  
TCTTCGATTCGCGCGTTGTCATTCACCATGAATTTTTGCGGAAAAATCAGACCGTAAACC  
GTTACTACTACAATGATGTGCTTCGTAGACATTGTGAAAATGTCCGTCGCAAAAGACCGG  
AAATGTGATCCGACAATTCGTGGTCTCTCCTTCATGATAATGCCTCAGCCCATTCCGCGT  
TGCAAATTCGCAAATTTTGACAAAAACCGGGATGAGCATCCTCCACACCCTCCGTA  
CTCCTGATCTTGCTCCAGCAGACTTTTTTCTGTTTCTGAACTTAAAATTCCTCTTAAGG  
GACAGAGATTCTCTAAAAGCTCACGCATTTCTCAAAATCACAAAACGCACTTGGACACA

GTACGAGGGCTGTCCCAAAAGAAACCGGACTTTTGT CATAGAAGGCGAACCGAGCTTCGT  
AATGAAGTTTTCTTGGGCTTGTTC AAAGCTGATAAGCTACTGGACTACTGGAGATGCTT  
GTTTTTACAGAATGCAAAAATTCGTCTTG GTAAGGAACTACACGCTTTGGAATAAAGGA  
AAGTCAAACCTCTAGTTACAATTTTTGTCTTTATTTCAAGAAAAATTTAGATACAACTTTT  
TTTAAAAAAAAAAAAAAAAAAAAAAAAACAGGTTTTAAGTTGAAAAACTTCGCTGCTCTCTTA  
TTCAAATGCTTAAAAATAAGGAAATTAATATTTTAAGCAGCTTACCAAGTCATCACCTAT  
CCCCTTCAAATACTCGCCAGCTTTGTCGATGCATATTTGCCATCGTTTCTTCAATTGGG  
AGAAACACTGTTGGAAATCCTCAGGTTTGAATGATCGCAATTCTTTTAGGTGTTCTCTT  
GAATTTACCGAAAGGAGAAACTGCCAATCGCGAATATAACAATGGTGTTCTGAGACGATT  
ACGCGAAAATGTCCGCAGAAAAAGGTCCGAGCTTAGGGGAGAGAATTCCTGGTTTCTGCA  
TCACGATAATGCCCCTTACCTGCCCATGCATTCTCCAACTCGCGAATTTTGTCAAAT  
AATGCCATGAGTGTCTCCCTCATCCCCCTTATTCACCTGACCTGGTTCCGTGTGATTTT  
TTCTTATTTCCACGACTTAAATCTACCCTGAAAGGTGCGACGTTTTCAAACCATTCCGAAA  
ATTCAGAGAACACCTTGAAGGAATTGCGATCATTCAAACCTGAGGATTCCAACAGTGT  
TCCTCCCAATTGTGGAAACGGTGGCAAAAATGCATCGACAAAGCTGTCGAGTATTTTGAA  
GAAGATAGGTGATGACTTGGTAAGTTGCTTAAAATGTTAATTTCTTATTTTTTAAGCATT  
TGAATAAGAGAGCAGCGAAGTTTTTCAACTAAAACCTGTTTTTTTTTTTTTTTTTTTTT  
TTTAAAAAAAAAGTTGTATCTAAATTTTTCTTGAAATAAAGACAAAAATTGTAAC TAGAGT  
TTGACTTTCCTTTATTCCAAGCGTGTAGTTTCCTTACCAAGACGAATTTTGCATTCTG  
TAAAAACAAGCATCTCCAGTAGCTTATCAGCTTTCAAACAAGCCCAAGAAAACCTTCATTA  
CAACGCTCGGTTTCGCTTCTATGACAAAAAGTCCGGTTTTCTTT

>Btmar1.4|gi|1092455215|gb|MAMS01000097\_1|:10626-11767  
gi|1092455215|gb|MAMS01000097.1|:10626-11767 Bemisia tabaci isolate MEAM1 Scaffold325, whole  
genome shotgun sequence 1142 bp

TACAAGGGCTGTCCCAAAGAAACCAGACTTTTGTTCATAGGAGGCTGACCGAGCATCATA  
AGGTTTTCTTGGGCTTATCTGATAGCTGACAATTCGACAAAAATTGCTATTTTACGGAA  
TGTA AAAATTTCGTATTGGTTCGGACACATCATGCTTTGGAATAAAGGAAAGTCAAACACA  
AGTTTCGAATTCTGCCTTATTTATTTAAAAACAATTTTGTAGATACAACCTTAAGAAAAAAA  
TAAGGTTGCTTTCTTATTCAAATGCTTAAAAATAAAGAAATTAACATTTCAAGCAGCTAA  
CCGAGTCATACTCCATCCCCTTCAAATACTCTCCAGCTTTGTCGATGCATTTTGGCAC  
CGTTTCTTCAAGTGGGGAAAGCGCTGTAAAATTCCTCGGGTTGAATGACTGCAATTAC  
TTCAAAGAGTTTTTTGAATTTCTAGAATGGTCTGAAAATGTCGAACCTTCAAGGTAGAT  
TTCAGTGGTGGAAATAAGACAAATCACAAGGAGCAAGGTCAAATGAATAAGGGGGAGAGG  
GAGGGCACTGGCATTCTTTGCAAAAAATTTGCGAATTTGAAGTAATGCATGGACAGGTGC  
ATGATGGTGATACAGAAACCAGGAATTTTTCTCAAAGCCCTGGCCTTTCTGCGGAC  
ATTTTGCATAATCATCTCAGAACACCATTGTAATATTTGCAGTTAACAGTTTCTCCTGT  
CGGTAAAAATTCAAGCAATTGCGGTCATCCGAACCTGATGAATTTAAACAGTGTTTCTTC  
CACTTGAGGAAACGGTGGCAAAAATGCATCCACAAAGCTGGGGAGTATTTGACGGGGAT  
GGGTTATGACTCTGTAAGCTGCTTGAGATGTTTAATTCCTTATTTTAAAGCATTGAATT  
AGAGAGCAACTTTATTTTTTACTTAAAATCTAAGTTGTACTTATCTAATTTTTTTTTT  
TTAAATAAAGACAGAATTCACAACCTTGTGTTTGACTTTCCTTTTTTCCAAGGTAGGTAG  
TGTCAAACCAATACGAATTTTACTTTCCATAATAATAGCAATTTTGTGATTTGTCA  
GCTATCAGATAAGCCCAAGAAAACCTTACGATGCTCGGTTGGCCTCCTTGACAAAAGTC  
CG

>Btmar1.5|gi|1092429459|gb|MAMS01016079\_1|:1-654 gi|1092429459|gb|MAMS01016079.1|:1-654  
Bemisia tabaci isolate MEAM1 Scaffold76633, whole genome shotgun sequence 654 bp

GAATGATCGCAATTCCTTCAAGGTGTTCTTGAATTTCCGGAATGGTTTGAAAACGTCA  
ACCTTCAAGGTAGATTTAAGTCGTGAAGAAAAATCACACGGAGCCAGGTCAGGTGAAT  
AGAGGGGATGAGGGAGGACACTCATGGCATTCTTGCACAAAATTCGCGAATTTGGAGGG  
ATGCTTGGGCAGGTGCATTATCATGATGCAGAAACCAGGAATTCTCTCTCAAAGCTCGG  
GCCTTTTTCTGCGGACATTTTCGCGTAATCGTCTCAGAACACCATTGTAATATTCTCGGT

TGACAGTTTCACCTGAAGGAATTGCGATCATTCAAACCTGCGGATTTTCAACAGTGTTT  
CTCCCGATTGAAGAAATGGTGGCAAAAATGCATCGACAAAGCTGGCGAATATTTTGAAGG  
GGATAGGTGATGACTTGGTAAGCTGCTTAAAATGTTGATTCCTTATTTTAAAGCATTTG  
AATAAGAGAGCAACGAAGTTTTTAACATAAAACCTGGTTTTTTTTTAAGTTGTATCTAAA  
TTTTTCTTGAAATAAAGACAAAAATCCAAACTCGAGTTTGACTTTCCTTTATTCCAAAGC  
GTGTAGTTTCCTTACCAAGACCAATGTTTGCTTCTGTAAAAATAAGCATCTTC

>Btmar1.6|gi|1092454277|gb|MAMS01000420\_1|:2631387-2632574  
gi|1092454277|gb|MAMS01000420.1|:2631387-2632574 Bemisia tabaci isolate MEAM1 Scaffold1063,  
whole genome shotgun sequence 1188 bp

TACGAGGGCTGTCCCAAAGAAACCGGACTTTTGTATAGAAGGCGAACCGAGCGTCGTA  
ATGAAGTTTTCTTGGGCTTGTTGAAAGCTGATAAGCTACTGAAGATGCTTGTTTTTACA  
GAATGCAAACATTGGTCTTGGTAAGGAACTAAGTACACGCTTGGAATAAAGGAAAGTC  
AAACTCGAGTTGCGATTTTTGTCTTTATTTCAAGAAAAATTTAGATACAACCTTTAAAAAA  
ACCCAGGTTTTAAGTTAAAACTTCGTTGCAATCTTATTCAAATGCTTAAAAATAAGGAA  
ATCAACATTTTAAGCAGCTTACCAAGTCATCACCTATCCCCTTCAAAATACTCGCCAGCT  
TTGTGATGCATTTTTGCCACCGTTTCTTCAATTGGGAGAAACACTGTTGGAAATCCTCA  
GGTTTGAATGATCGCAATTCCTTCAAGGTGTTCTTGAATTTCCGGAATGGTTTGAAAA  
CGTCGACCTTTCAAGGTAGATTTAAGTCGTGAAGAAAAAATCACACGGAGCCAGGTCAGG  
TGAATCAGGTGAATAGAGGGGATGAGGGAGGACACTCATGGCATTCTTGCACAAAATTC  
GCGAATTTGGAGGGATGCTTGGGCAGGTGCATTATCGTGATGCAGAAACCAGGAATTCTC  
TCTCCAAAGCTCGGGCCTTTTTCTGCGGACATTTTCGCGTAATCGTCTCAGAACACCATT  
GTAATATTCTCGGTTGACGGTTTCACCTGAAGGAATTGCGATCATTCAAACCTGCGGAT  
TTTCAACAGTGTTTCTCCCGATTGAAGAAACGGTGGCAAAAATGCATCGACAAAGCTGGC  
GAATATTTTGAAGGGGATAGGTGATGACTTGGTAAGCTGCTTAAAATGTTGATTTCTTA  
TTTTTAAGCATTTGAATAAGAGAGTAACGAAGTTTTTAACCTAAAACCTGGTTTTTTTTT  
TTAAGTTGTATCTAAATTTTTCTTGAAATAAAGACAAAAATCCAAACTCGAGTTTGACTT  
TCCTTTATTCCAAAGCGTGTAGTTTCCTTACCAAGACCAATGTTTGCATTCTGTAAAAAC  
AAGCATCTTTAGTAGCTTATCAGCTTCAAACAAGCCCAAGAAAACTTCATTACGACGCT  
CTGTTTCGCTTCTATGACAAAAGTCCGGTTTCTTTGGGACAGCCCTC

>Btmar1.7.1\_gi-1092455142-gb-MAMS01000117\_1-:185258-186227

gi-1092455142-gb-MAMS01000117.1-:185258-186227 Bemisia tabaci isolate MEAM1 Scaffold382, whole genome shotgun sequence 970 bp

TACGAGGTCTGTTAGATTAGAAACCGGATTTTGGTCATAACTAGCCCACAATGCGTCCAA  
ATTACGTTTTCTTGAGTTTTCTGATAGCTGGAAATATACTTAAGAACGTTACGTTACACA  
AGTTTGAAAAATCATAATTAGCTTCCTTGGTATGTGGCTTGAAGTAAGGCAACCTCAAAG  
GTGTTTTGCAATTTTTTTGTTTCACCGAACTTGTCTCTCTTTTTTCGGTCTTGCACTACA  
TTTTTCAACCCACAAGGACGATTGGCGTTTCGTCTCCATATCGTAGCCGTGCACAAAAGT  
ATTGACACCGAAAATTATCCTATCCAAAATGTAGGATCACTGTTACAACGTTCAAGTAG  
CTAAAGGGAAATGACATGTTGTTGGATTTTCGTTCAACGGACAACAATCAAGGGGCAAGT  
GTACCTTAACTCGATGCGTGTCTACATATTCTATCAAAATTGTATGTACAGAGCCTTCA  
GAAATATTACTCTGTTCAACAAGCTCGAAACGACCGTTTTCGAGCACTTTTGCCACATT  
TCTTCCACGTGACAAATGTCAGTTGCCGTTGAGGGTCGATTCCCATGCTCCTCATCTTTG  
ACGAACTCCTGACCAGTTTGAATCGTTTAACCCATTCAAACAGTAGGAACATCTCATA  
CAATGACCATGGTAAACTTTACTTAGCATATACCAAAGTTTCGGTACAAGGTATACCGA  
GTTTAAACAAAATTTAATGTTGAATCTTTGCTCTATCAGTGATCGCATGATGAAAATCG  
CAAACGCACCTGACTTACTCGTATTCAAGATGACACAGAATAAACTGATCAAAATAA  
ACAAAATCTGTGAACGCTGCGTTCTTAAGTATATTTCCAGCTATCAGGAAAGCTCAAGAA  
AACCTAATTTGGACGCATTGTGGGCTAGTTAATGACCAAAATCCGGTTTCTAATCTAACA  
GACCTCGTAT

--

>Btmar1.7.2\_gi-1092428455-gb-MAMS01017083\_1-:176949-177917

gi-1092428455-gb-MAMS01017083.1-:176949-177917 Bemisia tabaci isolate MEAM1 Scaffold812, whole genome shotgun sequence 969 bp

TACGAGGTCTGTTAGATTAGAAACCGGATTTTGGTCATAACTAGCCTACAATGCGTCCAA  
ATTACGTTTTCTTGAGCTTTTCTGATAGCTGAAAATATATTTAAGAACGCTACGTTACACA  
AATTTGAAAAATCCTAATTAGCTTCGTTGGTATGTGGCTTGAAGTAAGGCAACCTCAAGG  
GTGTTTTGCGATTTTATGTTTGACCAAACCTTGTCTCTCTTTTTTCGGTCTTGCAACA  
TTTTTCAACCCACAAGGACGATTGGAGTTTCGTCTCCATATCGTAGCCGTACACTAAAGT

ATTGTCACCTAAAATTATCCTATCCAAAAATGTAGGATCATTGTTAGAACGTTCAAGCAG  
CTAAAGGTAATTTGACATTTGGTTGGTTTTTCGTTCAAAGGACAACAATCAAGGGGCAAG  
TGTACCTGAAACTCGATGCGTGTCTACAGATTCTATCAAAATTGTATGTACAGAGCCTTC  
AGAAATATGACTTTGTTCAACAAGCTCGAAACGACCATTTTCGAGCACTTTTGCCCGCAT  
TTCTTCCACGTGACAAATGTCAGTCGCCGCTGAGGGTCGATTCCCACGCTCCTCATCTTT  
AACGAACTCCTGACCAGTTTTGAATCGTTTAACCCATTCAAAACAGTGGGAACATCTCAT  
ACAATGATCATGGTAAACTTTTCTTAGCATATACCAAAGTTTCGGTACAAGGTATACCG  
AGTTTAAAACAAAATTTAGTGTGAATCTTTGCTCTGTCAGTGATCGCATGCTAAAATCG  
CAAAACGCACCTGACTTACTCGTATTCAAGATGACACAGAATAAACTGATCAAAATAA  
ACAAAATCTGTGAACGTAGCGTTCTTAAGTATATTTCCAGCTATCAGGAAAGCTCAAGAA  
AACCTAAATCGGACGCATTGTGGGCTAGTTATGACCAAATCCGGTTTCTAATCTAACAG  
ACCTCGTAT

>Btmar1.7.3\_gi-1092428455-gb-MAMS01017083\_1-:160954-161920

gi-1092428455-gb-MAMS01017083.1-:160954-161920 Bemisia tabaci isolate MEAM1 Scaffold812, whole genome shotgun sequence 967 bp

TACGAGGTCTGTTAGATTAGAAACCGGATTTTGGTCATAACTAGCCTACTGTGCGTCCGA  
ATTAGGTTTTCTTGATTTTTCTGATAGCTGGAAATATACTTAAGAACGCTTCGTTCA  
GATTTGAAAAATCTTAATTAGCTTCGTTGGTATGTGGCCTCAAGTACGGCAACCTCATGG  
GTGTTTTGCGATTTTTATGATTGACCGAACTTGTCTCTTTTTTCGGTCTTGCGCTACA  
TTTTTCAATCTATAAGGATGATTGGAGTTTCGTCTCCGCATCTTAACCGTACCTTCAAGT  
ATTATACCGAAAATTATCCTATCCAAAAATGTAGGATCATTGTTAGAACGTTCAAGCAG  
CTATAGGGAAATGAACATTTGGTTGGATTTTTGTTCAACGGACAACAATCGAGGGGCAAG  
TGTACCTGAAACTCGACGCATGTCTACATATTGTGTCAAATTTGTATGTACAGAGCCTTC  
AGAAATATTACACTGTTCAAGCAAGCTCGAAACGACCATTTTCGAGACTTTATCCCGCACT  
TCTTCCACGTGACAAATGTTAGTTGCCGTTGATGGTCGATTCCCATGCTCCTCATCTTCA  
ACGAACTCCTGACCAGTTTTGAATCGTTTAACCCACTCAAAATAGTGATAACAACATCATA  
CTATGATCTTGGTAACTTTACTTGGCATACCAAAGTTTCGGTACAACGTATACCGAGC  
TTAAAACAAAATTTAATGTAAATCTTTGCTCTATCCGTGATCGCATGATGAAAATCGCA  
AAACACCCATGAGGTTGCCGTA CTGAGGCCACGTACCAACGAAGCTAATTAAGATTTTT  
CAACTCTGTGAACGTAGCGTTCTTTAGTATGTTATCAGCTATCAGAAAAGTTCAAGAAAA

CCTAATTCGGACACACAATAAGCTAGTTATGACCAAAATCCGGTTTCTAATCTAACAGAC  
CTCGTAT

--

>Btmar1.7.4\_gi-1092455272-gb-MAMS01000090\_1-:5812844-5813810  
gi-1092455272-gb-MAMS01000090.1-:5812844-5813810 Bemisia tabaci isolate MEAM1 Scaffold300,  
whole genome shotgun sequence 967 bp

TACGAGGTCTGTTAGATTAGAAACCGGATTTTGGTCGTAAGTACGCTATTGTGCGTCCAA  
ATTTAGTTTTCTTGATCTTTCCTGATAGCTGAAAATATATTTAAGAAGACGTCCACAGAT  
TTGAAAAATCTTAATTAGCTTCGTTGGTATGTGGCTTCAAGTACGGCAACCTCATAGGTG  
TTTTGCGATTTTTATGTTTGACCGAAATTGTCTCTCTTTTTTCGGTCTTGCGCTACATTT  
TTCAATCCACAAGGATGATTGGAGTTTCGTCTCCGTATCTTAGCCGTACACTCAAGTATT  
TTCACCGAAAATTCTCCTATCAAAAAATGTAGGATCATTTTTAGCACGTTCAAGCAGCTA  
TAGGGAAATTAACATTTGGTTGGATTTTGTTCACGGACAACAATCAAGGGGCAAGTGTA  
CCTGAAACTCGATGCATGTCTACATATTCTATTAATAATTGTATGTACAGAGCCTTCAGAA  
ATATTACACTGTTTCAGCAAGCTCGAAACGACCATTTTCGAGACTTTTGCCCGTACTTCTT  
CCACGTGACAAATGTTAGTTACCGTTGATGCTCGGTTCCCATGCTCCTCATCTTCAACGA  
ACTCCTGACCAGTACAGTTTTGAATTGTTTAACCCACTCAAAATAGTGAGAACAACTCAT  
ATCATGATCTTGGTAAACTTTACTTAGCATACCAAAGTTTCGGTACAAGGTAAACCGAG  
CTTAAACAAAAATGTAATGTTAAATCTTTGCTCTGTCAGTGATCGCATAATGAAAATCGC  
AAAACGCACCTGACTTCCTCGTATTCAAGATGACACAGAATAAACACTGATCAACATAAA  
CAAAATCTGTGAACGTAGCGTTCTTTAGTATGTTATCAGCTATCAGAAAAGTCCAAGAAA  
TCCTAATTCGGACGTACAGCAAGCTAGTTATGACCAAAATCCGGTTTCTAATCTAACAGA  
CCTCGTA

>Btmar1.7.5\_gi-1092455272-gb-MAMS01000090\_1-:7120603-7121570  
gi-1092455272-gb-MAMS01000090.1-:7120603-7121570 Bemisia tabaci isolate MEAM1 Scaffold300,  
whole genome shotgun sequence 968 bp

TACGAGGTCTGTTAGATTAGAAACCGGATTTTGGTCATAACTAGCCTACTGTGCGCTTGA  
ATTAGGTTTTCTTGGTCTTTCCTGATAGCTGAAAATATACTTAAGAACGATACGTTACA  
GATTTGAAAAATCTTAATTAGCTTCGTTGGTATGTGGCTTCAAGTACAGCAACCTCATGG  
GTGTTTTGCGATTTTTATGTTTGACCGAACTGTCTCTCTTTTTTCGGCCATGCACTATAT



TTTTCAATCCACAAGGATGATTGGAGTTTCGTATCGTAGCCGTACAGCGTACACTCAAGT  
ATTATGACCGAAAATTATCCTATCCAAAAATGTAGGATCATTGTTAGAACGTTCAAGCAG  
CTATGGAGAAATTAACATTTGGCTGGATTTTTGTTCAACGGACAACAATCAAAGGGCAAG  
TGTACCTGAAATGTCGATGCATGTCTATATATTCTATCAAAATTGTATGTACAGAGCCTT  
CAGAAATATTACACTGTTCAAGCTCGAAACAACCATTTTCGAGACTTTTGCCAGCAC  
TTCTTCCACGTGAAAAATGTTAGTTGCCGTTGATGGTCGATTCCCATGCTCCTCATCTTC  
AACGAACTCCTGACCGGTTTTGTATTTTAACCCACTCAAATAGTGAGAACAGCTCATA  
CAATGATCTTGGTAAACTTTACCTAACATACCAAAAGTTTCGGTACAAGATATACCGAGC  
TTAAACAAAAATTTAATGTAAATTTTGCCTATCAGAGATCGCATGATGAAAATCGCA  
AAACGCACCTGACTTCCTCATATTCAAGATGACACAGAATAAACACTGATCAAATAAAC  
AAAATCTGTGAACGTAGCGTTCTTCAATATGTAATCAGCTATCATAAAAGTCCAAGAAAA  
ACCTAATTCGGACGCGCGATAAGCTAGTTATGGCCAAAATCCGTTTCTAATATAACAGA  
CCTCGTAT

--

>Btmar1.7.6\_gi-1092445549-gb-MAMS01004285\_1-:2729206-2730174  
gi-1092445549-gb-MAMS01004285.1-:2729206-2730174 Bemisia tabaci isolate MEAM1 Scaffold2557,  
whole genome shotgun sequence 969 bp

TACGAAGTCTGTTAGAGTAGAAACCGGATTTTGGTCATAACTAGCCCACAATGCGTCCAA  
ATTACGTCTTCTTGAGCTTTTCTGATAGCTGAAAATATATTTTAAGAATGCTACGTTTAC  
AAATTTGAAAAATCATAATTAGCTTTGTTGGTATGTGGCTTGAAGTAAGGCAACCTCAAG  
GGTGTTTTGCTATTTTTATGTTTGACCGAACTTGTCTCTCTTTTTTCGGTCTTGCACTAC  
ATTTTTCAACCCACAAGGACGATTGGAGTTTCGTCTCCATATCGTAGCCGTACACTAAAG  
TATTGTCACAGAAAAATATCCTATCCAAAAATGTAGGATCATTGTTAGAACGTTCAAGCA  
GCTAAAGGGAAATTGACATTTGGTTGGATTTTCGTTCAACGGACAACAATCAAGGGGCAA  
GTGTACCTGAAACTCGATGCGTGTCTACATATTCTATCAAAATTGTATGCACATAGCCTT  
CAGAAATATTACTCTGTTCAACAAGCTCGAAACGACCATTTTCGAGCACTTTTGCCCGCA  
CTTCTTCCACGTGACGAATGTCAGTTGCCGTTGAGGGTAGGTTCCCATACTCCTCATCTT  
CGACGAACCCCTGACCAGTTTTGAATCGTTTAACCCACTCAAACAGTGGAACATCTCA  
TACAATGATCTTGGTAAACTTTACTTAGCATACCAAAAGTTTCGGTACAAGGTATACAGA

GTTTAAACAAAATTAATGTTGAGTCTTGCTCTATCAGTGATCGCATGCTGAAAATCG  
CAAAACGCACCTGACTTACTTGCAATTCAAGATGACACAGAATAAACACTGATCAAAATAA  
ACAAAATCTGTGAACGTAGCGTTCTTAAGTATATTTCCAGCTATCATAAAAGCTCAAGGA  
AACCTAATTCGGACGCATTGTGAGCTAGTTATGACCAAAATCCGGTTTCTAATCTAACAG  
ACCTCGTAT

--

>Btmar1.7.7\_gi-1092455544-gb-MAMS01000025\_1-:7309992-7310960  
gi-1092455544-gb-MAMS01000025.1-:7309992-7310960 Bemisia tabaci isolate MEAM1 Scaffold147,  
whole genome shotgun sequence 969 bp

TACGAGGTCTGTTAGATTAGAAACCGGATTTTGGTCATAACTAGCCCACAATGCGTCCAA  
ATTACGTTTTCTTGAGCTTTTCTGATAGCTGAAAATATATTTAAGAACGCTACGTTCA  
AATTTGAGAAATCCTAATTAGCTTCGTTGGTATGTGGCTTGAAGTAAGGCAACCTCAAGG  
GTGTTTTGCGATTTTTATGTTTGACCGAACTTGTCTCTTTTCTCGGTCTTGCACTACA  
TTTTTCAACCCACAAGGACGATTGGAGTTGCGTTTCCATATCGTAGCCGTACATTAGAGT  
ATTGTCACCGAAAATTATCCTATCCAAAATTGTAGGATCATTGTTAGAACGTTCAAGCAG  
CTAAAGGGAAATTGACATTTGGTTGGATTTTCGTTCAACGGACAACATTCAAGGGGCAAG  
TGTACCTGAAACTCGATGCGTGTCTACATATTCTATCAAAATTAATGTAAAGAGCCTTC  
AGAAATATTACTCTGTTCAACAAGCTCGAAACGACCATTTTCGAGCACTTTTGCCCGCAC  
TTCTTCCACGTGACAAATGTCAGTTGCCGTTGAGGGTCGATTCCCATGCTCCTCATCTTA  
GACGAACTCCTGACCAGTTTTGAATCGTTTAACCCATTCAAAACAGTGGAACATCTCAT  
TCAATGATCATGGTAACTTTACTTAGCATATACCAAAGTTTCAGTACAAGGTATACCGA  
GTTTAAACAAAATTTAATGTTTAATCTTTGCTCTATCAGTGATCGCATGATGAAAATCG  
CAAAACGCACCTGACTTACTCGTATTCAAGATGACACAGAATAAACACTGATCAAAATAA  
ACAAAATCTGTGAAGGTAACGTTCTTCAGTATATTTTCAGCTATCAGGAAAGCTCAAGAA  
AACCTAATTCGGACGCATTGTGGGCTAGTTATGACCAAAATCCGGTTTCTAATCTAACAG  
ACCTCGTAT

--

>Btmar1.7.8\_gi-1092455544-gb-MAMS01000025\_1-:3897727-3898696  
gi-1092455544-gb-MAMS01000025.1-:3897727-3898696 Bemisia tabaci isolate MEAM1 Scaffold147,  
whole genome shotgun sequence 970 bp

TACGAGGTCTGTTAGATTAGAAACCGGATTTTGGTCATAACTAGCCCACAATGCGTCCAA  
ATTACGTTTTCTTGAGCTTTTCTGATAGCTGAAAAATATATTTAAGAACGCTACGTTCA  
AATTTGAAAAATCCTAATTAGCTTCGTTGGCATGTGGCTTGAAGTAAGGCAACCTCAAGG  
GTGTTTTGCGATTTTTATGTTTGACCGAACTTGTCTCTCTTTTTTCGGTCTTGCACTACA  
TTTTTCAACCCACAAGGACGATTTGAGTTTCGTCTCCATATCGTAGCCGTACACTAAAGT  
ATTGCCCCCGAAAATTATCGTATCCAAAAATGTAGGATCAATGTTAGAACGTTCAAGCAG  
CTAAACGAAAATTGACATTTGGTTGGATTTTCGTTCAACGGACAACAATTAAGGGGCAAG  
TGTACCTGAAACTCAATGCGTGTCTACATTTTCTATCGAAATTGTATGTACAGTGCCTTC  
AGAATTATTACTCTGTTCAACTAGCTCGAAACGACCATTTTCGAGCACTTTTGCCCGCCC  
TTCTTCCACGTGACAAGTGTGAGTTGCAGTTGAGGGTCGATTCCCATGCTCCTCATCTTT  
GACGAACTCCTGACCAGTTTTGAATCGTGTAACCCATTCAAAACAGTGGGAACATCTCAT  
ACAATGATCATGGTAACTTTATTCAGCATATACCAAAGTTTCGGTACAAGGTTTACCG  
AGTTTAAACAAAATTTAATGTTGAATCTTTGCTCTATCAGTGATCGCATGATGAAAATC  
GCAAAACGCACCTGACTTACTCGTATTCAAGATGACACAGAATAAACACTAGTTAAAATA  
AACAAAATCTGTGAACGTAGCGTTCTTTAGTATATTTCCAGCTATCAGGAAAGCTCAAGA  
AAACCTAATTCGGACGCATTGTGGGCTAGTTATGACCAAATCCGGTTTCTAATCTAACA  
GACCTCGTAT

--

>Btmar1.7.9\_gi-1092455048-gb-MAMS01000147\_1-:68525-69496  
gi-1092455048-gb-MAMS01000147.1-:68525-69496 Bemisia tabaci isolate MEAM1 Scaffold477, whole  
genome shotgun sequence 972 bp

TACGAGGTCTGTTAGATTAGAAACCGGATTTTGGTCATAACTAGCCTACAATGCGTCCAA  
ATTACATTTTCTTGAGCTTTTCTGATAGCTGAAAAATATATTTAAGAACGCTACGTTCA  
AATTTGAAAAATCCTAATTAGCTTCGTTGGTATGTGGCTTGAAGTAAGGCAACCTCAAGG  
GTGTTTTGCGATTTTTATGTTTGACCGAACTTGTCTCTCTTTTTTCGGTCTTGCAACA  
TTTTTCAACCCACAAGGACGATTGGAGTTTCGTCTCCATATCGTAGCCGTACACTAAAGT  
ATTGTCACCTAAAATTATCCTATCCAAAAATGTAGGATCATTGTTAGAGCGTTCAAGCAG  
CTAAAGGTAATTTGACATTTGGTTGGATTTTCGTTCAAAGGACAACAATCAAGGGGCAAG  
TGTACCTGAAATGTACTCGATGCGTGTCTACATATTCTATCAAAATTGTATGTCCAGAGC  
CTTCAGAAATATGACTTTGTTCAACAAGCTCGAAACGACCATTTTCGAGCACTTTTGCCC

GCATTTCTCCACGTGACAAATGTCAGTCGCCGTTGAGGGTCGATTCCCACGCTCCTCAT  
CTTTAACGAACTCCTGACCAGTTTTGAATCGTTTAACCCATTCAAAACAGTGGGAACATC  
TCATACAATGATCATGGTAACTTTTCTTAGCATATACCAAAGTTTCGGTACAAGGTAT  
ACCGAGTTTAAACAAAATTTAGTGTTGAATCTTTGCTCTGTCAGTGATCGCATGCTAAA  
ATCGCAAAACGCACCTGACTTACTCGTATTCAAGATGACACAGAATAAACTGATCAAA  
ATAAACAAAATCTGTGAACGTAGCGTTCCTTAAGTATATTTCCAGCTATCAGGAAAGCTCA  
ACAAACCTAAATCGGACGCATTGTGGGCTAGTTATGACCAAAATCCGGTTTCTAATCTA  
ACAGACCTCGTA

--

>Btmar1.7.10\_gi-1092455225-gb-MAMS01000096\_1-:5156532-5157499  
gi-1092455225-gb-MAMS01000096.1-:5156532-5157499 Bemisia tabaci isolate MEAM1 Scaffold322,  
whole genome shotgun sequence 968 bp

TACGAGGTCTGTTAGATTAGAAACCGGATTTTGGTCATAACTAGCCCACAATGCGTCCAA  
ATTACGTTTTCTTGAGCTTTTCTGATAGCTGAAAATGTATTTAAGAACGCTACGTTCA  
AATTTGAAAAATCATAATTAGCTTTTTTGGTATGTGGCTTGAAGTGAGGCAACCTCAAGG  
GTGTTTTGCGATTTTATGTTTGACCGAGCTTGTCTCTCTTTTTTCGGTCTTGCACTACC  
TTTTTCAACCCACAAGGACGATTGGAGTTTCGTCTCCATATCGTAGCCGTGCATTTAAGT  
ATTGTCACCGAAAATTATCCTATCCAAAAATATAGGATCATTGTTAGAACGTTCAAGCAG  
CTAAAGGGAAATTGACATTTGGTTGGATTTTCGTTCAACGGACAACAAGCAAGGGGCAAG  
TGTACCTGAAACTCGATGCGTTTCTACATATTCTATCAAAATCGTATGTACAGAGCCTTC  
AGAAATATTACTCTGTTCAACAAGCTCGAAACGACCATATTCGAGCACTTATGCCCCGAC  
TTCTTCCACGTGACAAATGTCAGTTGCCGTTGAGGGTCGATTCCCATACTCCTCATCTTC  
GACGAACTCCTGACCAGTTTTGAATCGTTTAAGCCACTCAAAACAGTGGGAACATCTCAT  
ACAATGATCTTGGTAACTTTACTTAGCATACCAAAGTTTCGGTACAAGGTATACCGAG  
TTTAAACAAAATTAATGTTGAGTCTTTGCTCTATCAGTGATCGCATGCTGAAAATCGC  
AAAACGCACCTGACTTACTCGTATTCAAGATGACACAGAATAAACTGATCAAAATAAA  
CAAAATCTGTGAACGTAGCGTTCCTTAAGTATATTTCCAGCTATCAGGAAAGCTCAAGAAA  
ACCTAATTCGGACGCATTGTGAGCTAGTTATGACCAAAATCCGGTTTCTAATCTAACAGA  
CCTCGTAT

--

>Btmar1.7.11\*\_gi-1092451109-gb-MAMS01001813\_1-:1111430-1112415  
gi-1092451109-gb-MAMS01001813.1-:1111430-1112415 Bemisia tabaci isolate MEAM1 Scaffold1570,  
whole genome shotgun sequence 986 bp

TACGAGGTCTGTTAGATTAGAAACCGGATTTTGGTCATAACTAGCCCACAATGCGGCCAA  
ATTACGTTTTCTTGAGCTTTTCTGATAGCTGAAAATATATTTAAGAACGCTACGTTCAAA  
AATTTGAAAAATCCTAATCAGCTTCGTTGGTATGTGGCTTGAAGTAAGGCAACCTCAAGG  
GTGTTTTGCGATTTTATGTTTGACCGAACTTGTCTCTCTTTTTTCGGTCTTGACGTAC  
TAAATTTTCAACCCACAAGGACGATTGGAGTTTTGTCTCCATATTGTAGCCGTACACTA  
AAGTATTGTAATCGAAAATTATCCTATCCAAAAATGTAGGATCATTGATAGAACGTTCAA  
GCAGCTAAAGGGAAATTGACATTTGGTTGGATTTTCGTTCAACGGACAACAATCAAGGAG  
CAAGTGACCTGAACTCGATACGTGTCTACATATTCTATCAAAATTGTATGTACAGAGC  
CTTCAGAAATATTACTCTGTTCAACAAGCTTGAAACGACCATTTTCGAGCACTTCTGCCC  
GCACTTCTGCCCCGACTTCTCCACGTGACAAATGTCAGTTGCCGCTGAGGGTCGATTCC  
CATGCTCCTCATCTTTGACGAACTCCTGACCAGTTTTGAATCGTTTAACCCATTCAAAAC  
AATGGGAACATCTCATACAATGATCATGGTAATTTTGACGAAGCATATACCAAAGTTTC  
GGTACAAGGTATACCGAGCTTAAACAAAATTTAATGTTGAATCTTTGCACTATCAGTGA  
TCGCATGATGAAAATCGCAAAACGCACCTGACTTACTCGTATTCAAGATGACACAGAATA  
AACACTGATCAAAATAAACGAAATCTGTGAACGTAGCGTTCTTCAGTACATTTCCAGCTA  
TCAGGAAAGCTCAAGAAAACCTAATTCGGACGCATTGTGGGCTAGTTATGACCAAAATCC  
GGTTTCTAATCTAACAGACCTCGTAT

--

>Btmar1.7.12\_gi-1092453460-gb-MAMS01000794\_1-:1444035-1445002  
gi-1092453460-gb-MAMS01000794.1-:1444035-1445002 Bemisia tabaci isolate MEAM1 Scaffold1185,  
whole genome shotgun sequence 968 bp

TACGAGGTCTGTTAGATTAGAAACCGGATTTTGGTCATAATTAGCCCGCAATGCGTCCAA  
ATTACGTTTTCTTGAGCTTTTCTGATAGCTGAAAATATATTTAAGAACGCTACGTTTACA  
AATTTGAAAAATTCTGATTAGCTTTGTTGGTATGTGGCTTGAAGTAAGGCAACCTCAAGG  
GTGTTTTGCGATTTTATGTTTGACCGAATTTGTCTCTCTTTTTTCGGTCTTGCACTACA  
TTTTTCAACTCACAAGGACGATCGGAGTTTTGTCTCCATATCGTAGCCGTACACTAAAGT

ATTGTCACCGAAAATTATCCTATCCAAAAATGTAGGATCATTGTCAGAACGTTCAAGCAG  
CTAAAGGGAAAATTGACATTTGGTTGGATTTTCGTTCAACGGACAACAATCAAGGAGCAAG  
TGTACCTGAAACTCAATGCATGTCTACATATTCTATGAAAATTGTATGTACAGAGCTTTC  
AGAAACATTACTCTGTTCAACAAGCTCGAAACGACCATTTTCGAGCACTTTTGCCCGCAC  
TTCTTCCACGTGACAAATGTCAGTTGCCGTTGAGGGTCGATACCCATGCTCCTTATTTTC  
GACGAACTCCTGACCAGTTTTGAATCGTTTAACCCACTCAAAACAGTAGGAAGATCTCAT  
ACAATTATCTTGGTAAACTTTACTTAGCAAACCAAAAGTTTCGGTGCAAAGTATACCGAG  
TTTAAACAAAATTAATGTTGAATCTTTGCTCTATCAGTAATCGCATGATGAAAATCGC  
AAAACGCACCTGACTTACTCGTATTCAAGATGACACAGAATAAACACTGATCAAAATAAA  
CAAAATCTGTGAAGGTAGTATTCTTAAGTATAATTCCAGCTATCAGGAAAGCTCAAGAAA  
ACCTAATTCGGACGCATTGTGGGCTAGTTGTGACCAAAATCCGTTTCTAATCTAACAGA  
CCTCGTAT

--

>Btmar1.7.13\_gi-1092426089-gb-MAMS01019449\_1-:1430109-1431079  
gi-1092426089-gb-MAMS01019449.1-:1430109-1431079 Bemisia tabaci isolate MEAM1 Scaffold923,  
whole genome shotgun sequence 971 bp

TACGAGGTCTGTTAGATTAGAAACCGGATTTTGGTCATAACTAGCCCACAATGCGTCCAA  
ATTACGTTTTCTTGAGCTTTTCTGATAGCTGGAAATATACTTAAGAACGCTACTTTCATA  
AGTTTGAAAAATCCTAATGAGCTTCGTTGGTATGTGGCTTGAAGTAAGGCAACCTCAAGG  
GTGTTTTGCGATTTTTATGTTTCACCGAACTTGCCCTCTTTTTTCGGTCTTGCACTACA  
TTTTTCAACCCACAAGGGACGATTGGAGTTTTGTCTCCATATCGTAGCCGTACACTAAAA  
TATTGTCACCGAAAATTATCCTATCCAAAAATGTAGGATCACTGTTAGAACGTTCAAGCA  
GCTAAAGGGAAAATTGACATTTGGTTGGATTTTCGTTCAACGGACGACAATCAAGGGGCAA  
GTGTACCTGAAACTCGATGCGTGTCTACATATTCTATCAAAATTGTATGTACAGAGCCTT  
CAGAAATATTACACTGTTCAACAAGCTCGAAACGACCGTTTTTCGAGCACTTTTGCCCGCA  
TTTCTTCCACGTGACAAATGTCAGTTGCCGTTGAGGGTCGATTCCCATGCTCCTCATCTT  
TGACAAACTCCTGACCAGTTTTGAATCGTTTAACCTATTCAAAACAGTGGGAACATCCCA  
TACAATGATCATGGTAAACTTTACTTAGCGTATACCAAAAGTTTTGGTACAAGGTATACC  
GAGTTTAAACAAAATTTAATGTTGAATCTTTGTTCTATCAGTGATCGCATGATGAAAAT  
CGCAAAACGCACCTGACTTACTCGTATTCAAGATGACCCAGAATAAACACTGATCAAAAT

AAACAAAATCTGTAAACGTAGCGTTCTTAAGTATATTTCCAGCTATCAGAAGAGCTCAAG  
AAAACGTAATTTGGACGCATTATGGGGTAGTTATGACCAAATCCGGTTTCTAATCTAAC  
AGACCTCGTAT

>Btmar1.7.14\_gi-1092426089-gb-MAMS01019449\_1-:303360-304328  
gi-1092426089-gb-MAMS01019449.1-:303360-304328 Bemisia tabaci isolate MEAM1 Scaffold923, whole  
genome shotgun sequence 969 bp

TATGAGGTCTGTTAGATTAGAAACCGGATTTTGGTCATAACTAGCCCACAATGCGTCCAA  
ATTACGTTTTCTTGAGCTTTTCTGATAGCTGAAAGTATATTTAGGAACGCTACGTTCAACA  
AATTTGAAAAATCCTAATTAGCTTCGTTGGTATGTGGCTTGAAGTAAGAAAACCTCAAGG  
GTGTTTTGCGATTTTTATGTTTGACCGAACTTGTCTTTTTTTCGGTCTTGCACTATATT  
TTTCAACCTCTAAGGACGATTGGAGTTTCTCCTCCATATCGTAGCCGTACACTAAAGTAT  
TGTCACCGAAAATTATCCTATCCAAAAATGTAGGGTCATTGTTAGAACGTTCAAGCAGCT  
AGAGGGAAATTGACTTTTGGGTGGATTTTCGTTCAACGGACAACGATCAAGGGGCAAGTG  
TACCTGAAACTCGATGCGTGTCTACATATTCTATCAAAATTGTATGTACAGAGCCTTCAG  
AAATATTACTCTGTTCAACAAGCTCGAAACGACCATTTTCGAGCACTTTTACCCGCACTT  
CCTCCACGTGACAATTGTCAGTTGCTGTTGAGGGTCGATTCCCATGCTCCTCATCTTTGA  
CGAACTCCTGACCAGTTTTGAATCGTTTAACCCATTCAAAACAGTGGGAACATCTCATAC  
AATGATCATGGTAACTTCACTAAGCATATACCAAAAGTTTCGGCACAAGGTATACCGAG  
TTTAAAAACAAAATTTAATGTTGAATCTTTGCTCTATCAGTGATCGCATGATGAAAATCG  
CAAAACGCACCTGACTTACTCGTATTCAAGATGACACAGAATAAACACTGATCAAAATAA  
ACAAAATCTGTGAACGTAGCGTTCTTAAGTATATTTCCAGCTATCAGGAAAACCTCAAGAG  
AACCTAGTTCGGACGCATTGTGGGCTAGTTATGACCAAATCCGGTTTCTAATCTAACAG  
ACCTCGTAT

--

>Btmar1.7.15\_gi-1092455188-gb-MAMS01000105\_1-:2904508-2905474  
gi-1092455188-gb-MAMS01000105.1-:2904508-2905474 Bemisia tabaci isolate MEAM1 Scaffold343,  
whole genome shotgun sequence 967 bp

TACGAGGTCTGTTAGATTAGAAACCGGATTTTGGTCATAACTAGCCCACAATGCGTCCAA  
ATTACGTTTTCTTGAGCTTTTCTGATAGCTGAAAATATATTAAAGAACGCTACGTTCAACA  
AATTTGAAAACCTCATAAATAGCTTTGTTGGTATGTGGCTTGAAGTTAGGCAACCTCAAGG

GTGTTTTGCGATTTTATGTTTGACCGAACTTGTCTCTCTTTTTTCGGTCTTGCACTACA  
TTTTTCAACCCACAAGGACGATTGGAGTTTCGTCTCCATATCGTAGCCGTACACTTAAGT  
ATTGTCACCGAAAATTATCCTATCCAAAAATGTAGGATCATTGTTAGAAAGTTCAAGCAG  
CTAAAGGGAAAATTGACATTTGGTTTGATTTTCGTTCAACGGACAACAATCAAGGGGCAAG  
TGTACCTGAAACTCGATGCGTGTCTACATATTCTATCAAAATTGTAATTGCAGAGCCTTC  
AGAAATATTACTCTGTTCAACAAGCTCGAAACGACCATTTTCGAGCACTTTTGCTCGCAC  
TTCTTCCACGTGACAAATGTCAGTTGCCGTTGAGGGTCGATTCCCATGCTCCTCATCTTT  
GACGAACTTCTGACCAGTTTTGAATCGTTTAAACCACTCAAAACAGTGGAACATCTCAT  
ACAATGATCTTGGTGAACCTTACTTAGCATACCAAAAGTTTCGGTACAGAGTATACCGAG  
TTTAAACAAAATTAAATGTTGAGTCTTTGCTCTATCAGTGATCGCATGCTGAAAATCGC  
AAAACGCACCTGACCTACTCGTATTCAAGATGACACAGAATAAACACTGATCAAAATAAA  
CAAAATCTGTGAACGTAGCGTTCTTAAATATATTTCCAGCTATCAGGAAAGCTCAAGAAA  
ACCTAATTCGGATGCATTGTGAGCTAGTTATGACCAAAATCCGGTTTCTAATCTAACAAA  
CCTCGTA

--

>Btmar1.7.16\_gi-1092455529-gb-MAMS01000026\_1-:196009-196980  
gi-1092455529-gb-MAMS01000026.1-:196009-196980 Bemisia tabaci isolate MEAM1 Scaffold15, whole  
genome shotgun sequence 972 bp

TACGAGGTTTGTTAGATTAGAAACCGGATTTTGGTCATAACTAGCCCACAATGCGTCCAA  
ATTACGTTTTCTTGAGCTTTTCTGATAGCTGGAAATATACTTAAGAACGCTACGTTCA  
AGTTTGAAAAATCCTAAAGAGCTTTGTTGGTATGTGGCTTGAAGTAAGGCAGCCTCAAGG  
TTGTTTTGCGATTTTATGTTTCACCGAACTTGTCTCTCTTTTTTCGGTCTTGCACTACA  
TTTTTCAACCCACAAGGACGATTGGAGTTTGTCTCCATATCGTAGCCGTACACTAAAAT  
ATTGTCACCGAAAATTATCCTATCCAAAAATGTAGGATCACTGTTAGAACGTTCAAGCAG  
CTAAAGGGAAAATTGACATTTGGTTGGATTTTCATTCAACGGACAACAATCAAGGGGCAAG  
TGTACCTGAAACTCGATGCGCGTGTCTACATATTCTATCAAAATTGTATGTACAGAGCCT  
TCAGAAATATTACTCTGTTCAACAAGCTCGAAACGACCGTTTTTCGAGCACTTTTGCCCGC  
ATTTCTTCCACGTGACAAATGTCAGTTGCCGTTGAGGGTCGATTCCCATGCTCCTCATCT  
TTGACGAACTCTGACCAGTTTTGAATCGTTTAACTCATTCAAAACAGTGGAACATCTC



ATACAATGATCATGGTAACTTTACTTAGCGTATACCAAAGTTTTGGTACAAGGTATAC  
CGAGTTTAAACAAAATTTAATGTTGAATCTTTGTTCTATCAGTGATCGCATGCTGAAAA  
TCGCAAAACGCACCTGACTTACTCGCATTCAAGACGACACAGAATAAACACCGATCAAAA  
TAAACAAAATCTGTGAACGTAGCGTTCCTAAGTATTTTTCCAGCTATCAGAAGAGCTCAA  
GAAAACGTAATTTGGACGCATTGTGGGGTAGTTATGACCAAATCCGGTTTCTAATCTAA  
CAGACCTCGTAT

--

>Btmar1.7.17\_gi-1092455529-gb-MAMS01000026\_1-:3093013-3093958  
gi-1092455529-gb-MAMS01000026.1-:3093013-3093958 Bemisia tabaci isolate MEAM1 Scaffold15,  
whole genome shotgun sequence 946 bp

AACCGGATTTTGGTAATAACCAGCCCACAATGCGTCCGAATCAGGTTTTCTGAACTTCT  
CTGTTAGCTAGAAATATACTAAGAACGATACGTTACCAATTTGAAAAATCCCAATTAGC  
TTCGTTGTTATGTGGCTTGAAGTAAGGCAACCCTCATGGGTGTTCTGCGATTTTATGTT  
TGACCGAACTTGTCTCTCTTTTTTCGGTCTTGCACTGCATTTTTCAACCCACAAGGATGA  
TTGGAGTTTCGTCTCCATATCGTAGCCGGACACTTAAGTATTGTCACCGAAAATTATCCA  
ATCCCAAATGTAGGATCATTGTTAGAACGTTTCGAGCAGCTAAAGGGAAATTGACATTCA  
GTTGGATTTTTGTTCAACGGACAACAATCAAGGGGCAAGTGTACCTGAAACTCGATGCAT  
GTCTACATATTCTATCAAAATTAAATGTACAGAGCCTTCAGAAATATTATACTGTTCAGC  
AAGCTCGAAACGACCATTTTCGAGCACTTTTGCCCGCACTCCTTCACGTGACAAATGTC  
AGTTGCCGTTGATGGTCGATTCCCGTGCTACTCATCTTCGACGAACTCCTGACCAGTTTT  
GAATCGTTTAACCCATTTAAACAGTGAGAACAACCTCATACAATGATCTTGGTAACTTT  
ACTTAGTATACCAAAGTTTTCGATACAAGGTATAACGAGTTTAAAAAAAATGTAATGTT  
AAATCTTTGCTCTGTCAAGTATCGCATGATGAAAATCGCAGAGCGCTCCTGTCTTCTCG  
TATTCAAGATGACACAGAAAAAACTGATCAAAATAAACAAAATCTGTGAATCTAGTGT  
TCTTCAATATGTTATCAGCTATCGGAAAAGTCCAAGGAAACCTAATTCGGACGCACACTG  
GGCTAGCTATCACCAAATCCGATCTCTAATCTAACAGACCTCGTA

--

>Btmar1.7.18\_gi-1092427374-gb-MAMS01018164\_1-:393232-394200  
gi-1092427374-gb-MAMS01018164.1-:393232-394200 Bemisia tabaci isolate MEAM1 Scaffold862, whole  
genome shotgun sequence 969 bp

TACGAGGTCTGTTAGATTAGAAACCGGATTTTGGTCATAACTAGCCCACAATGCGTCCAA  
ATTACGTTTTCTTGAGCTTTTCTGATAGCTTAAATATATTTAAGAACGCTACGTTTACA  
AATTTGAAAAATCCTAGTTAGCTTCGTTGGTATGTGGCTTGAAGTAAGGCAACCTCAAGG  
GTGTTTTGCGATTTTCATGTTTCACCGAACTTGTCTCTTTTTTCGGTCTTGCACTACA  
TTTTTCAACCCACAAGGACGATTGGAGTCTTGTCTCCGTATCGTAGCCGTCCGCTAAAGT  
ATTGTCACCGAAAATTATCCTATCCAAAAATGTAGGATCATTGTTAGAACGTTCAAGCCG  
CTAAAGGGAAATTGACATTTGGTTGGATTTTCGTTCAACGGACAACAATCAAGGGGCAAG  
TGTACCTGAAACTCGATGCGTGTCTACATATTCTATCAAAATTGTATGTACAGGGCCTTC  
AGAAAAATTACTCTGTTCAACAAGCTCGAAACGACCATTTTCGAGCACTTTTGCCCAAAC  
CTCTCCACGTGACAAATGTCAGTTGCCGTTGAGGGTCGATTCCCATGCTCCTCATCTTT  
GACGAACTCCTGACCAGTTTTGAAACGTTTAACCCATTCAAAACAGTGGGAAAATCTCAT  
ACAATGATCATGATAAACTTTACTTAGCATATACCAAAGTTTCGGTACAAGGTATACCG  
AGTTTAAACAAAATTTAATGTTGAATCTTTGCTCTATCAGTGATCGCATGATGAAAATC  
GCAAAACGCACCTGACTTACTCGTATTCAAGATAACAAAGAATAAACACTGATTAAATA  
AACAAAATCTGTGAACCTAGCGTTCTTAAATATATTTCCAGCTATCAGGAAAGCTCAAGA  
AAACCTAATTCGGACGCATTGTTGGCTAGTTATGACCAAAATCCGGTTTCTAATCTAACA  
GACCTCGTA

--

>Btmar1.7.19\_gi-1092429439-gb-MAMS01016099\_1-:238247-239213  
gi-1092429439-gb-MAMS01016099.1-:238247-239213 Bemisia tabaci isolate MEAM1 Scaffold767, whole  
genome shotgun sequence 967 bp

TACAAGGTCTGTTAGATTAGAAACCGGATTTTGGTCATAACTAGCCCACAATGCGTCCAA  
ATTACGTTTTCTTGAGCTTTTCTGATAGCTGAAAATATATTTAAGAACGCTACTTTCACA  
AATTTGAAAAAGCCAAATCAGCTTCGTCGGTATGTGGCTTGAAGTAAGGCAACCTCAAGG  
GTGTTTTGCGATTTTTATGTTTGACCGAACTTGTCTCTTTTTTTTCGGTCTTGCACTACA  
GTTTTCAACCCACAAGGACGATTGGAGTTTCGTCTCCATATCGTAGCCGTACACTAAAGT  
ATTGTCATCGAAAATTATCCTATCCAAAAATGTAGGATCATTGTTAGAACGTTCAAGCAG  
CTAAAGGGAAATTGACATTTGGTTGGATTTTCGTTCAACGGACAACAATCAAGGGACAAA

TGTACCTGAAACTCGGTGTGTGTCTACATATTCTATCAAAATTGTATGTACAGAACCTTC  
AGAAATTAGACTCTGTTCAACAAGCTCGAAACGACCATTTCGAGCTTTTTTGGCCGAAC  
TTCTTTCACGTGACAAATTCAGTTGCCGTTGAGGGTCGATTCCCATGCTCCTCATCTTT  
GACGAACTCCTGACCAGTTTTGAATCGTTTAACCCATTCAAAACAGTGGAACATCTCAT  
ACAATGATCATAGTAAACATTTACTTAGCATATACCAAAGTTTCGGTATAAGGTATACC  
GAGTTTAAAGCATAATTTAATGTTGAATCTTTGCTCTATCAGTGATGTTATGATGAAAAT  
CGCAAAACGCACCTGACTTACTCGTATTCAAGATGACACAGAATAAACACTAATCAGAAT  
AAACAAAATCTGTGAACGTAGCGTTCCTTAAGTATATTTCCAGCTATCAGAAAAGCTCAAG  
AAAACCTAATTCGGACGCATTGTGGGCTAGTTATGACCAAAATCCGGTTTCTAATCTAAC  
AGACCTC

>Btmar1.7.20\_gi-1092429439-gb-MAMS01016099\_1-:2935493-2936460  
gi-1092429439-gb-MAMS01016099.1-:2935493-2936460 Bemisia tabaci isolate MEAM1 Scaffold767,  
whole genome shotgun sequence 968 bp

TACGAGGTCTGTTAGATTAGAAACCGGATTTTGGTCATAACTAGCCTACAATGCGTCCAA  
ATTACGTTTTCTTGAGCTTTTCTGATAGCTGAAAATATATTTAAGAACGCTACGTTCA  
AATTTGAAAAATCCTAATTAGCTTCGTTGGTATGTGGCTTGAAGTAAGGCAACCTCAAGG  
GTGTTTTGCGATTTTTATGTTTGACCGAACTTGTCTCTTTTTTCGGTCTTGCAACA  
TTTTCAACCTAAAAGGACGATTGGAGTTTCGTCTCTATATCGTAGCCGTACACTAAAGT  
ATTGTCACCTAAAATTATCCTATCCAAAAATGTAGGATCATTGTTAGAACGTTCAAGCAG  
CTAAAGGTAATTTGACTTTTGGTTGGATTTTCGTTCAAAGGACAACAATCAAGGGGCAAG  
TGTACCTGAAACTCGATGCGTGTCTACATATTCTATCAAAATGGTATGTACAGAGCCTTC  
AGAAATATGACTTTGTTCAACAAGCTCGAAACGACCATTTTCGAGCACTTTTGGCCGCAT  
TTCTTCCACGTGACAAATGTCAGTCGCCGTTGAGGGTCGATTCCCACGCTCCTCATCTTT  
AACGAACTCCTGACCAGTTTTGAATCGTTTAACCCATTCAAAACAGTGGAACATCTCAT  
ACAATGATCATGGTAACTTTTCTTAGCATATACCAAAGTTTCGGTACAAGGTATACCG  
AGTTTAAACAAAATTTAGTGTTGAATCTTTGCTCTGTCAGTGATCGCATGCTAAAATCG  
CAAAACGCACCTGACTTACTCGTATTCAGGATGACACAGAATAAACACTGATCAAAATAA  
ACAAAATCTGTGAACGTAGCGTTCCTTAAGTATATTTCCAGCTATCAGGAAAGCTCAAGAA  
AACCTAAATCGGACGCATTGTGGGCTAGTTATGACCAAAATCCGGTTTCTAATCTAACAG  
ACCTCGTA

>Btmar1.7.21gi|1092454111|gb|MAMS01000491\_1|:957990-958959  
gi|1092454111|gb|MAMS01000491.1|:957990-958959 Bemisia tabaci isolate MEAM1 Scaffold1090,  
whole genome shotgun sequence 970 bp

TACGAGGTCTGTTAGATTAGAAACCGGATTTTGGTCATAAGTAGCCCACAATGCGTCCAA  
ATTACGTTTTCTTGAGCTTTTCTGATAGCTGAAAATATATTTAAGAACGCTACGTTACACA  
AATTTGAAAAATCCTAATTAGCTTCGTTGGTATGTGGCTTGAAGTAAGGCAACCTCAAGG  
CTGTTTTGCGATTTTTTATGTTTGACCGAACTTGTCTCCCTTTTTTCGGTCTTGCACTAC  
ATTTTTCAACCCACAAGGACGATTGGAGTTTCGTCTCCATATCGTAGCCGTACACTACAG  
TATTGTCACCAAAAATCCTATCCAAAAATGTAGGATCATTGTTAGAACGTTCAAGCA  
GCTAAAGGGAAATTGACATTTGGTTGGATTTTCGTTCAACGGACAACAATCAAGGGGCAA  
GTGTACCTGAAACTCGATGCGTGTCTACATATTCTATCAAATTGTACGTACAGAGCCTT  
CAGAAATATTTCTGTGTTCAACAAGCTCGAAACGACCATTTTCGAGCACTTTTGCCCGCA  
CTTCTCCATGTGACAAATGTCAGTTGCCGTTGAGGGTCGATTTCCATGCTCCTCATCTT  
TGACAAACTCCTGACCAGTTTTGAATCGTTTAACCCATTCAAACAGTGGAACATCTCA  
TACAATGATCATGGTAAACTTTACTTAGCATATACCAAAGTTTCGATACAAGGTATACC  
GAGTTTAAACAAAATTTAATGTTGAATCTTTGCTCTATCAGTGATCGCATGATGAAAAT  
CGCAAAACGCACCTGACTTACTCGTATTCAAGATGACACAGAATAAACTGATCAAAAT  
AAACAAAATCTGTGAACGTAGTGTCTTAAATATATTTCCAGCTATCAGGAAAGCTCAAG  
AAACCTAATTCGGACGCATTGTAGGCTAGTTATGACCAAAATCCGGTTTCTAATCCAAC  
AGACCTCGTA

>Btmar1.7.22\_gi-1092455378-gb-MAMS01000055\_1-:917920-918886  
gi-1092455378-gb-MAMS01000055.1-:917920-918886 Bemisia tabaci isolate MEAM1 Scaffold226, whole  
genome shotgun sequence 967 bp

TACGAGGTCTGTTAGATTAGAAACCGGATTATGGTGATAACTAGCCCACAATGCGTCCGA  
ATTAGGTTTTCTGAACTTTCCTGATAGCTGGAAATATACTTAAGAACGTTACGTTACACA  
AATTTGAAAAATCCAATTAGCTTCGTTAGAATGTGGCTTGGAGTAAGGCAACCTCATGG  
GTGTTCTGCGATTTTTATGTTAATAGAACTTGTCTCTCTTTTTTCGGTCTTGCACTACA  
TTTTTCAACCAACAGGGATGATTGGAGTTTTGTCTCCATATCGTAGCCGTACACACAAGT  
ATTGTCCCGAAAATTATCCTATCCAAAAATTTAGGATCATTGTTAAAACGTTCAAGCAG

CTAAAGGGAAATTGACGTTTGGTCGTATTTTTGTTCAACGGACAACAGTCAAGGGGCAAA  
TGTATCTGAAACTCGATGCATGTCTACATATTCTATCAAAATTGTATGTATAGAGCCTTC  
AGAAATATTACACTCTTCAGCAAGCTCGAAACGACCATTTTTGTCCACTTTTGTCCGCAC  
TTCTTCCACGTGACAAATGTCAGTTGCCGTTGATGGTCGATTCTGTGCTCCTCATCTTC  
GACAAACTCCTGACCAGTTTTGAATCGTTTAACCCATTCAAAATAGTGAGAACAACTCAT  
ACAATGATCTTGGTGAACTTTCCTTCGCATACCAAAAGTTTCGGTACAAGGTATACCGAG  
TTTAAAAAGAAGTTTAATGTTAAATCTTTGCTCTGTCACTGATTGCATGATGAAAATCGT  
AGAATGCACCTGACTTACTCGTACTCAAGATGACACAGAATAAACACTGATCAAAATAAG  
CAAAATCTGTGAATCTAGCATTCTTCAATATGTTATCAGCTATCAGGAAAGTCCAAGGAA  
ACCTAATTCGGATGCACACTCGGCTAGTTATCACCAAAATCTGGTTTCTAATCTAACAGA  
CCTCGTA

--

>Btmar1.7.23\_gi-1092455591-gb-MAMS01000016\_1-:2576248-2577191  
gi-1092455591-gb-MAMS01000016.1-:2576248-2577191 Bemisia tabaci isolate MEAM1 Scaffold132,  
whole genome shotgun sequence 944 bp

CGGATTTTGGTCATAACTAGCCACAATGCGTCCAAATTACGTTTTCTTGAGCTTTTCTG  
ATAGCTGAAAATATATTTAAGAACGCTACGTTCAAAATTTGAAAAGTCATAATTAGCTT  
TGTTGGTATGTTGCTTGAAGTAAGGCAACCTCAAGGGTGTTTTGCGATTTTATGTTTGA  
CCGAACCTGTCTCTCTTTTTTCGGTCTTGCACTACATTTTCAACCCACAAGGACGATTA  
GAGTTTCGTCTCCATATCGTAGCCGCACACTTAAGTATTGTCACGGAAAAATTATCCTATC  
CAAAATGTAGGATCATTGTTAAAACGTTCAAGCAGCTAAAGGGAAATTGACATTTGGTT  
GGATTTTCGTAAACGGACAACAATCAAGGGGCAAGTGACCTGAAACTCGATGCGTGTC  
TACATATTCTATCAAAATCGTATGTACAGAGCCATCGGAAATATTACTCTGTTCAACAAG  
CTCGAAACGACCATTTTCGAGCACTTTTGCCCGCACTTCTTCCACGTGACAAATGTCAGT  
TGCCATTGAGGGTCGATTCCCATACTCCTCATCTTCGACGAACTCCTGACCAGTTTTGAA  
TCGTTCAACCCACTCAAAACAGTGGGAACATCTCATACAATGATCTTGGTAAACTTTACT  
TAGCATACCAAAAGTTTCGGTACAAGGTATACCGAGTTTAAAACAAAATTAAATGTTTAG  
TCTTTGCTCTATCAGTGATCGCATGCTGAAAATCGCAAAACGCACCTGACTTGCTCGTAT  
TCAAGATGACACAAAATAATCACTGATCAAAATAAACAAAATCTGTGAACGTAGCGTTCT  
TAAGTATACTTCAGCTATTAGGAAAACCTAAGGAAACCTAATTCGGACGCATTGTGGGC

TAGTTATGACCAAAATCCGGTTTCTAATCTAACAGACCTCGTAT

--

>Btmar1.7.24\_gi-1092450672-gb-MAMS01002091\_1:-565029-565995  
gi-1092450672-gb-MAMS01002091.1:-565029-565995 Bemisia tabaci isolate MEAM1 Scaffold1685,  
whole genome shotgun sequence 967 bp

TACGAGGTCTGTTAGATTAGAAACCGGATTTTGGTCATAACTAGCCCACAATGCGTCCAA  
ATTACGTTTTCTTGAGCTTTTCTGATAGCTGAAAATATATTTAAGAACGCTACGTTACACA  
AATTTGAAAAATCCTAATTAGCTTTGTTGGTATGTGGCTTGAAGTAAGGCAACCTCAAGG  
GTGTTTTGCGATTTTTATGTTTGACCGAATTTGTCTCTCTTTTTTCGGTCTTGCACTACA  
TTTTTCAACCCACAAGGACGATTGGAGTTTCGTCTCCATATTGTAGCCGTACACTAAAGT  
ATTGTCACCGAAAATTATCCTATCCAAAAATGTAGGATCATTGTTAGAACGTTTCATGCAG  
CTAAAGGGAAATTGACATTTGGTTGGATTTTCGTTCAACGGACAACAATCAAGGGGCAAG  
TGTACCTGAAACTCGATGCGTGTCTACATATTATATCAAAATTGTATGTACAGAGCCTTC  
AGAAATAACACTCTGTTCAACAAGCTCGAAACGACCATTTTCGAGCACTTTTGCCCGCAC  
TTCTTCCACGTGACAAATGTCAGTTGCCGTTGAGGGTCGATTCCCATGCTCCTCATCTTC  
GACGAACTCCTGACCAGTTTTGAATCGTTTAACCCACTCAAACAGGGGGAACATCTCAT  
ACAATGATCTTGGTAACTTTACTTAGTATACAAAAGTTTCGGTACAAGGTACACCGAG  
TTTAAACAAAATTAATGTTGAATCTTTGCTCTATCAGTGATCGCATGATGAAAATCGC  
AAAACGCACCTGACTTATTCGTATTCAAGATGACACAGAATAAACACTGATTAAGATAAA  
CAAATCTGTGAACGTAGCGTTCTAAAGTATATTTTCAGCTATCAGAAAAGCTCAAGAAA  
ACGTAATTTGGACGCATTGTGGGCTAGTTATGACCAAAATCCGGTTTCTAATCTAACAGA  
CCTCGTA

--

>Btmar1.7.25\_gi-1092455566-gb-MAMS01000020\_1:-2709189-2710158  
gi-1092455566-gb-MAMS01000020.1:-2709189-2710158 Bemisia tabaci isolate MEAM1 Scaffold14,  
whole genome shotgun sequence 970 bp

TACGAGGTCTGTTAGATTAGAAACCGGATTTTGGTCATAACTAGCCCACAATGCGTCCAA  
ATTACGTTTTCTTGAGTTTTTCTGATAGCTGGAAATATACTTAGGAACGTTACGCTCACA  
AACTTGAAAAATCCTAATTAGCTTCGTTGGTATTTGGCTTGAAGTAAGGCAACCTCAAGG  
GTGTTTTGCGATTTTTATGTTTCACCGAAGTTGTCTCTCTTTTTTCGGTCTTGCACTACA

TTTTCAACCCACAGGGACGATTGGCGTTTCGTCTCCATATCGTAGCCGTACACAAAAGT  
ATTGTCACCGAAAATTATCCTATCCAAAAATGTAGGATCACTGTTAGAACGTTCAAGCAG  
CTAAAGGGAAATTGAAATTTTGTGTTTTGATTTTCGTTCAACGGACAACAATCAAGGGGCAAG  
TGTACCTGAAACTCGATGCGGTGTCTACATATTCTATCAAAATTGTATGTACAGAGCCTTC  
AGAAATATTACTCTGTTCAATAAGCTCGAAACGACCGTTTTCGAGCACTTTTGCCCGCAT  
TTCTTCCACGTGACAAATGTCAGTTGCCGTTGAGGGTCGATTCCCATGCTCTTCATCTTT  
GACGAACTCCTGACCAGTTTTGAATCGTTTAACCCATTCAAAACAGTGGAAGCATCTCAT  
ACAATGACCATGGTAAACTTTACTTAGCGTATACCAAAAGTTTCGGTACAAGGTATACCG  
AGTTTAAACAAAATTTAATGTTGAATCTTTGCTCTATCAGTGATCGCATGATGACAATC  
GCAAAACGCACCTGACTTACTCGTATTCAAGATGACACAGAATAAACACTGATCAAAATA  
AACAAAATCTGTGAACGTAGCGTTCTTAAGTATATTTCCAGCTATCAGGAAAGCTCAAGA  
AAACCTAATTTGGACGCATTGTGGGCTAGTTATGACCAAAATCCGGTTTCTAATCTAACA  
GACCTCGTAT

--

>Btmar1.7.26\_gi-1092437712-gb-MAMS01008062\_1-:196194-197164  
gi-1092437712-gb-MAMS01008062.1-:196194-197164 Bemisia tabaci isolate MEAM1 Scaffold4122,  
whole genome shotgun sequence 971 bp

TACGAGGTCTGTTAGATTAGAAACCGGATTTTGGTCATAACTAGCCCACAATGCGTCCAA  
ATTAGGTTTTCTTGAGCTTTTTTGATAGCTGGAAATATACTTAAAAACGCTACGTTCACA  
AGTTTGAAAAATCCTAATGAGCTTCGTTGGTATGTGGCTTGAAGTAAGGCAACCTCAAGG  
GTGTTTTGCGATTTTATGTTTCACCGAACTTGCTCTCTTTTTTCGATCTTGCACCACA  
TTTTCAACCCACAACGACGATTGGAGTTTTGTCTCCATATCGTAGCCGTACACTAAAAT  
ATTGTCACCGAAAATTATCCTATCCAAAAATGTAGGATCACTGTTAGAACGTTCAAGCAG  
CTAAAGGGAAATTGACATTTGGTTGGATTTTCGTTCAACGGACGACAATCAAGGGGCAAG  
TGTACCTGAAACTCGATGCGCGTGTCTACATATTCTATCAAAATTGTATGTACAGAGCCT  
TCAGAAATATTACTCTATTCAACAAGCTCGAAACGACCGTTTTCGAGCACTTTTGCCCGC  
ATTTCTTCCACGTGACAAATGTCAGTTGCCGTTGAGGGTTGATTCCCATGCTCCTCCTCT  
TTGATGAACTCCTGACCAGTTTTGAATTATTTAACTCATTCAAAACAGTGGGAACATCTC  
ATACAATGATCATGGTAAACTTTACTTAGCGTATATCAAAAGTTTTGGTACAAGGTATAC

CGAGTTTAAACAAAATTTAATGTTGAATCTTTGTTCTATCAGTGATCGCATGATGAAAAT  
CGCAAAACGCACCTGACTTACTCGTAATCAAGATGACACAGAATAAACACTGATCAAAAT  
AAACAAAATCTGTAAACGTAGCATTCTTCAGTATATTTCCAGCTATCAGAAGAGCTCAAG  
AAAACGTAATTTGGACGCATTGTGGGGTAATTATGACCAAAATCCGGTTTCTAATCTAAC  
AGACCTCGTAT

--

>Btmar1.7.27\_gi-1092440704-gb-MAMS01006626\_1-:195611-196579  
gi-1092440704-gb-MAMS01006626.1-:195611-196579 Bemisia tabaci isolate MEAM1 Scaffold3536,  
whole genome shotgun sequence 969 bp

TACGAGGTCTGTTAGATTAGAAACCGGATTTTGGTCATAACTAGCCTACAATGCGTCCAA  
ATTACGTTTTCTTGAGCTTTTCTGATAGCTGAAAATATATTTAAGAACGCTACGTTCACA  
AATTTGAAAAATCTTAATTAACCTCGTTGGTATGTGGCTTGAAGTAAGGCGACCTCAAGG  
GTGTTTTGCGATTTTTATGTTTGACCGAACTTGTCTCTCTTTTTTCGGTCTTGCAACA  
TTTTTCAACCCACAAGGACGATTGGAGTTTCGTCTCCATATCGTAGCTGTACACTAAAGT  
ATTGTCACCGAAAATTATCCTATCCAAAAATGTAGGATCATTGTTAGAACGTTCAAGCAG  
CTAAAGGTAATTTGACATTTGGTTGGATTTTCGTTCAACGGACAACAATCAAGGGGCAAG  
TGTACCTGAAACTCGATGCGTGTCTACATATTCTATCAAAATTGTATGTACAGAGCCTTC  
AGAAATATTACTCTGTTCAACAAGCTCGAAACGACCATTTTCGAGCACTTTTGTCCGCAT  
TTCTTCCACAAGACAAATGTCAGTCACCGTTGAGGGTCGATTCCCATGCTCCTCATTTTT  
GACGAACTCCTGACCAGTTTTGAATCGTTTAACCCATTCAAAACAGTGGGGACATCTCGA  
AAAATGATCATGGTAACTTTTTTTAGCATATACCAAAGTTTCGGTACAAGGTATACCG  
AGTTTAAACAAAATTTTATGTTGAATCTTTGCTCTGTCAAGTATCGCATGCTAAAATCG  
CAAAACGCACCTGACTTACTCGTATTTGAGATGACACAGAATAAACTTTGATCAAAATAC  
ACAAAATCTGTGAACGTAGCGTTCTTAAGTATATTTTCAGCTATCAGGAAAGCTCAAGAA  
AACCTAATTCGGACGCATTGTGGGCTAGTTATGACCAAAATCCGGTTTCTAATCTAACAG  
ACCTCGTAT



>Btmar1.7.28\_gi-1092440704-gb-MAMS01006626\_1-:881072-882037  
gi-1092440704-gb-MAMS01006626.1-:881072-882037 Bemisia tabaci isolate MEAM1 Scaffold3536,  
whole genome shotgun sequence 966 bp

TACGAGGTCTGTTAGATTAGAAACCGGATTTTGGTCATAACTAGCCCTCAATGCGTCCAA  
ATTACGTTTTCTTGAGTTTTTGTGATAGCTGTAATATATTTAAGAACACTACGTTTACA  
AATTTGAAACATCCTAATTAGCTTCGTTGGTATGTGGCTTGAAGTAAGGCAACCTCAAGG  
GTGTTTTGCGATTTTTATGTTTGACCGAACTTGTCTCTCTTTTTCGGTCTTGACACAACAT  
TTTTCAACCCACAAGGACGATTGGAGTTTCGTCTCCATATCGTAGCCGTACACTGAAGTA  
TTGTCACCGAAAATTATCCTATCCAAAAATGTAGGATCAATGTTAGAACGTTCAAGCAGC  
TAAAGGGAACCTTGACATTTGGTTGGATTTTCGTTCAACGGACAACAACCAAGGGGCAAGT  
GTACCTGAAACTCGATGCGTGTCTAAATATTCTATCAAAATTGTACGTACAGAGCCTTCA  
GAAATATTACTCAGCTCAAATCTCGAAACGACCATTTTCGAGCACTTTTGGCCGCACATC  
TTCCACGTGACAAATGTCAGTTGCCGTTGAGGGTCGATTCCCATGTTCTCATCTTTGAC  
GAACTCCTGACCAGTTTTGAATCGTTTAACCCATTCAAAATAGAGGGAACATTCCATACA  
ATGATCATGGTAAACTTTACTTGGCATATACCAAAAGTTTCGGTACAAGGTATACCGAGT  
TTCAAACAAAATTTAATGTTGAATCTTTGCTCTATCGGTGATCGCATGATGAAAATCGCA  
AAACGCACCTGACTTACTCGTATTCAAGATGACACAGAATAAACGCTGATCAAAATAAAC  
AAAATCTGTGAACGTAGCGTTCTTAAGTATATTTTCAGCTATCAGAAAAGCTCAAGAAAA  
CCTAATTCGAACGCATTATGGACTAGTTATGACCAAAATCCGGTTTCTAATCTAACAGAC  
CTCGTA

--

>Btmar1.7.29\_gi-1092428043-gb-MAMS01017495\_1-:3631785-3632754  
gi-1092428043-gb-MAMS01017495.1-:3631785-3632754 Bemisia tabaci isolate MEAM1 Scaffold831,  
whole genome shotgun sequence 970 bp

TACGAGGTCTGTTAGATTAGAAACCGGATTTTGGTCATAACTAGCCCACAATGCGTCCAA  
ATTACGTTTTCTTGAGCTTTTCTGATAGCTGAAAATATATTTAAGAACGCTACGTTTACC  
AATTTGATAAATCCTAATTAGCTTCGTTGGTATGTGGCTTGAAGTAAGGCAACCTCAAGG  
GTGTTTTGCGATTTTTATGTTTGACCGAATTTGTCTCTCTTTTTCGGTCTTGCACTACA  
TTTTTCAACCCACAAGGACGATTGGAGTTTCGTCTCCATATTGTAGCCGTATACTAAAGT  
ACTGTCATCGAAAATTATCCTATCCAAAAATGTAGGACCATTGTTAGAACGTTCAAGCGG

CTAAAGGGAAATTGACATTTGGTTGAATTTTCGTTCAACGGACAACAATCAAGGGGCAAG  
TGTACCTGAAACTCTATGCGTGTCTACATATTCTATCAAAATTGTATGTACAGAGCCTTC  
AGAAATATTACTCTGTTCAACAAGCTCGAAACGACCATTTTCGAGCACTTTTGCCCGCAC  
TTCTTCCACGTGACAAATGTCAGTTGCCGTTGAGGGTCGATTCCCATGCTCCTCATCTTC  
GACGAACTCCTGACCAGTTTTGAATCGTTTAACTATTCAAAACAAGGGAAACATCTCAT  
ACAATGATCACGGTAAACTTTACTTGGCATATACAAGAGGTTTTGGTACAAGGTATACCG  
AGTTTAAAACAAAATTTAATGTTGAATCTTTACTCTATCAGTGATCGCATGATGAAAATC  
GCAAAACGCACCTGACTTACTCGTATTCAAGATGACGCAGAATAAGCACTGATCAAAATA  
AACAAAATCTGTGAACGTAGCGTTCTTAAATATATTTCCAGCTATCAGGAAAGCTCAAGA  
AAACCTAATTCGGACGCATTGTGGGCTAGTTATGACCAAAATCCGGTTTCTAATCTAACA  
GACCTCGTAT

--

>Btmar1.7.30\_gi-1092446696-gb-MAMS01003835\_1-:606340-607310  
gi-1092446696-gb-MAMS01003835.1-:606340-607310 Bemisia tabaci isolate MEAM1 Scaffold2366,  
whole genome shotgun sequence 971 bp

TACGAGGTCTGTTAGATTAGAAACCGGATTTTGGTCATAACTAGCCCACAATGCGTCCAA  
ATTACGTTTTCTTGAGCTTTTCTGATAGCTGAAAATATATATAGAAACGCTACGTTCA  
AATTTGAAAAATCCTAATTAGCTTCGTTGGTATGTGGCTTGAAGTAAGAAAACCTCAAGG  
GTGTTTTGCGATTTTTATGTTTGACCGAACTTGTCTCTTTTTTCGGTCTTGCACTATA  
TTTTTCAACCTCTAAGGACGATTGGAGTTTCTTCTCCATATCGTAGCCGTACACTAAAGT  
ATTGTCACCGAATATTATCCTATCCAAAAATGTAGGATCATTGTTAGAACGTTCAAGCAG  
CTAGAGGGAAATTGACTTTTGGGTGGATTTTCGTTCAACGGACAACGATCAAGGGGCAAG  
TGTACCTGAAACTCGATGCGTGTCTACATATTCTATCAAAATTGTATGTACAGAGCCTTC  
AGAAATATTACTCTGTTCAACAAGCTCGAAACGACCATTTTCGAGCACTTTTGCCCGCAC  
TTCCTCCACGTGACAAATGTCAGTTGCCGTTGAGGGTCGATTCCCTTGCTCCTCATCTTT  
GACGAACTCCTGACCAGTTTTGAATCGTTTAACTTCAAAACAGTGGGAACATCTCAT  
ACAATGATCATGGTAAACTTCACTAAGCATATACCAAAAGTTTCGGCACAAGGTATACCG  
AGTTTAAAACAAAATTTAATGTTGAATCTTTGCTCTATCAGTGATCGCATGATGAAAAT  
CGCAAAACGCACCTGACTTACTCGTATTCAAGATGACACAGAATAAACACTGATCAAAAT  
AAACAAAATCTGTGAACGTAGCGTTCTTAAAGTATATTTCCAGCTATCAGGAAAACCTCAAG

AGAACCTAGTTCGGACGCATTGTGGGCTAGGTATGACCAAATCCGGTTTCTAATCTAAC  
AGACCTCGTAT

--

>Btmar1.7.31\_gi-1092454721-gb-MAMS01000233\_1-:192441-193414  
gi-1092454721-gb-MAMS01000233.1-:192441-193414 Bemisia tabaci isolate MEAM1 Scaffold699, whole  
genome shotgun sequence 974 bp

TACGAGGTCTGTTAGATTAGAAACCGGATTTTGGTCATAACTAGGTCACAATGCGTCCAA  
ATTACGTTCTCTTGAGCTTTTCTGATAGCTGAAAATATATTTAAGAACGCTACGTTCA  
AATTTGAAAAATCCTAATTAGCTTCGTTGGTATGTGGCTTGAAGTAAGGCAACCTCAAGG  
GTGTTTTGCGATGTTTATGTTTGACCGAACTTGTCTCTCTTTTTTCGATCTTGCACTACA  
TTTTTCAACCCACAAGGACGATTGGAGGTTTGTCTCCATATCGTAGCCGTATACTAAATT  
ATTGTCACCGAAAATTATCCTATCCAAAAATGTAGGATCATTGTTAGAGCGTTCAAGCAG  
CTAAAGGGAAATTGACCTTTGGTTGGAGTTTCGTTCAACGGAGAACAATCAAGGGGCAAG  
TGTACCTGAAACTCGATGCGTGTCTACATATTCTATCAAAATTGTATGTAGGTACAGAGC  
CTTCAGAAATATTACTCTGTCCAACAAGCTCGAAACGATCATTTTCGAGCACTTTTGCCC  
GCATTTCTTTCACGTGACAAATGTCAGTTGCCGTTGAGGGTCGATTCCCATGATCCTCAT  
CTTTGACGAACTCCTGACCAATTTTGAATTATTTAACCCATTCAAAACAGTGGGAAAATC  
TCATACAATGATTATGGTAAATTTTACTTAGCATATACCAAACGTTTCGGTACAAGGTAT  
ACCGAGTTTAAACAAAAATTTAATGTTGAATCTTTGCTCCATCAGTGATCGCATGATGAA  
AATCGCAAAACGCACCTGACTTATTCGATTCAAGATGACACAGAATAATGACTGATCAA  
AATAAACAAAATCTGTGAACGTAGCGTTCTTAAGTATATTTCCAGCTATCAGGAAAATC  
AAGAAAACCTAATTCGAACGCATTGTGAGCTAGATATGACCAAATCCGGTTTCTAATCT  
AACAGACCTCGTAT

>Btmar1.7.32\_gi-1092451183-gb-MAMS01001779\_1-:242819-243790  
gi-1092451183-gb-MAMS01001779.1-:242819-243790 Bemisia tabaci isolate MEAM1 Scaffold1558,  
whole genome shotgun sequence 972 bp

TACGAGGTCTGTTAGATTAGAAACCGGATTCGGTCACAACCAGCCCAAATTTGTCCAA  
ATTACGTTTTCTTGAGCTTTTCTGATAGCTAAAAATATATTTAAGAACGCTACGTTCA  
AATTTGAAAAATCCTAATTAGCTTCGTTGGTATGTGGCTTGAAGTAAGGCAACCTCAAGG  
GTGTTTTGCGATTTTTATGTTTGACCGAACTTGTCTCTCTTTTCGGTCTTGCACTACAT  
TTTTCAACCCACAAGGACGATTGGAGTTTCGTCTCCATATCGTAGCCGTACATTAAAGTA  
TTGTCACCGAAAATTATCCTATCCAAAAATGTAGAATCATTGTTAGAACAGTCAAGCAGC  
TAAAGGGAAATTGACATTTTGTTGGATTTTCGTTCAACAGACAACAATCAAGGGGCAAGT  
GTACCTGAAACTCGATGCGTGTCTACATATTCTATCAAAATTGTATGTGCAGAGCCTTCA  
GAAATATTACTCTGTTCAACAAGCTCGAAACGACCATTTTCGAGCACTTTTGCCCGCACT  
TCTTCTACGTGACAAATGTCAGTTGCCGTTGAGGGTCGATTCCCAGCATGCTCCTCATCT  
TTGACGAACTCCTGACCAGTTTTGAATCCTTCAACCCATTCAAAACAGCGGGAACATCTC  
ATGCAATGATCATGGTAACTTTACATGGCATATACCAAAGTTTCGGCACAAGGTATAC  
CGAGTTTAAACAAAATTTAATGTTGAATCTTTGCTCTATCAGTGATCGCATGATGAAAA  
TCGCAAAACGCACCTGACTTACTCGTATTCAAGATGACACAGAATAAACACTGATCAAAA  
TAAGCAAAATCTGTGTACGTAGCGTTCTTAAGTATATTTCCAGCTATCAGGAAAGCTCAA  
GAAAACCTAATTCGACGCATTGTGGGCTAGTTATGACCAAAATCCGTTTCTAATCTAA  
CAGACCTCGTAT

--

>Btmar1.7.33\_gi-1092454766-gb-MAMS01000216\_1-:1830254-1831223  
gi-1092454766-gb-MAMS01000216.1-:1830254-1831223 Bemisia tabaci isolate MEAM1 Scaffold659,  
whole genome shotgun sequence 970 bp

TACGAGGTCTGTTAGATTAGAAACCGGATTTTGGTCATAACTAGCCCACAATGCGTCCAA  
ATTGCGTTTTCTTGAGCTTTTCTGATAGCTGGAAATATACTTAAGAACGCTACGTTCA  
AGTTTGAAAAATCCTAATTAGCTTCGTTGGTATGTGGCTTGAAGTAAGGCAACCTCAAGG  
GTGTTTTGCGATTTTTATGTTTCACCGAACTTCTCTCTCTTTTTTTGGTCTTGCACTACA  
TTTTCAACCCACAAGGACGATTGGAGTTTGTCTCCATATCGTAGCCGTACACTAAAAT  
ATTGTCACCGAAAATTATCCTATCCAAAAATGTAGGATCACTGTTAGAACGTTCAAGCAG  
CTAAAAGGAAATTGACATTTGGTTGGATTTTCGTTCAACGGACAACAATCAAGGGGCAAG  
TGTACCTGAAACTCAATGCGTGTCTACATATTCTATCAAAATTGTATGTACAGAGCCTTC  
AGAAATATTACTCTGTTCAACAAGCTCGAAACGACCGTTTTCGAGCACTTTTGCCCGCAT

TTTTCCACGTGACAAATGTCAGTTGCCGTTGAGGGTCGATTCCCATGCTCCTCATCTTT  
GACGAACTCCTGACCAGTTTTGAATCGTTTAACTCATTCAAACAGTGGGAACATCTCAT  
ACAATGATCATGGTAACTTTACTTAGCGTATACCAAAGTTTCGGTACAAGGTATACCG  
AGTTTAAACAAAATTTAATGTTGAATCTTTGCTCTATCAGTGATCGCATGATGAAAATC  
GCAAAACGCACCTGACTTACTCGTATTCAAGATGACACAGAATAAACACTGATCAAATA  
AACAAAATCTGTGAACGTAGCGTTCTTAAGTATATTTCCAGCTATCAGGAAAGCTCAAGA  
AAACCTAATTTGGACGCATTGTGGGCTAGTTATGACCAAATCCGGTTTCTAATCTAACA  
GACCTCGTAT

>Btmar1.7.34\_gi-1092451505-gb-MAMS01001621\_1-:242212-2423181  
gi-1092451505-gb-MAMS01001621.1-:242212-2423181 Bemisia tabaci isolate MEAM1 Scaffold1496,  
whole genome shotgun sequence 970 bp

TACGAGGTCTGTTAGATTAGAAACCGGATTTTGGTCATAACTAGCCACATTGCGTCCAA  
ATTACGTTTTCTTGAGCTTTTCTGATAGCTGAAAATATATTTAAGAACGCTACGTTCA  
AATTTGAAAAAGCCAAATCAGCTTCGTTGGTATGTGGCTTGAAGTAAGGCAACCTCAAGG  
GTGTTTTGCGATTTTATGTTTGACCGAACTTGTCTCTTTTTTTTCGGTCTTGCACTACA  
TTTTCAACCCACAAGGACGATTGGAGTTTCATCTCCATATCGTAGCCGTACACTAAAGT  
ATTGTCATCGAAAATTATCCTATCCAAAAATGTAGGATCATTGTTAGAACGTTCAAGCAG  
CTAAAGGGAAATTGACATTTGGTTGGATTTTCGTTCAACGGACAACAATCAAGGGGCAAA  
TGTACCTGAAACTCGGTGCGTGTCTACATATTCTATCAAATTGTATGTACAGAACCTTC  
AGAAATTAGACTCTGTTCAACAAGCTCGAAACGACCATTTCCAAGCTTTTTTGCCGAAC  
TTCTTTCACGTGACAAATGTCAGTTGCCGTTGAGGGTCGATTCCCATGCTCCTCATCTTT  
GACGAACTCCTGACCAGTTTTGAATCGTTTAAACCATTCAAAACAGTGGAAACATCTCAT  
ACAATGATCATAGTAAACATTTACTTAGCATATACCAAAGTTTCGGTATAAGGTATACC  
GAGTTTAAAGCATAATTTAATGTTGAATCTTTGCTCTATCAGTGATCTTATGATGAAAAT  
CGCAAAACGCACCTGACTTACTCGTATTCAAGATGACACAGAATAAACACTAATCAGAAT  
AAACAAAATCCGTGAACGTAGCGTTCTAAAGTATATTTCCAGCTATCAGAAAAGCTCAAG  
AAACCTAATTCGGACGCATTGTGGGCTAGTTATGACCAAATCCGGTTTCTAATCTAAC  
AGACCTCGTA

>Btmar1.7.35\_gi-1092451505-gb-MAMS01001621\_1-:45130-46099  
gi-1092451505-gb-MAMS01001621.1-:45130-46099 Bemisia tabaci isolate MEAM1 Scaffold1496, whole  
genome shotgun sequence 970 bp

TACGAGGTCTGTTAGATTAGAAACCGGATTTTGGTGATAATTAGCTCAGAATGCATCCGA  
ATTAGGTTTTCTGAATTTTCCTGATAGCTGAAAGTATACTTAAGAACGCTACGTTCA  
AATTTGAAAAATCTTCAGTAGCTTCATTGGTATGTGGCTTGAAGTAAGGCAACCTCTTGG  
GTGTTTTGCGATTTTATGTTTGACCGAACTTGTCTCCCTTTTTTCGGTCAAGCACTACA  
GTTTTCAACCCATAAGGATGATTGGAGTTTTGTCTCCATATCGTAGCCGTACACTTAAGT  
ATTTTCACTGAAAATTATCCTATCCAAAAATGTAGGATCATTGTTAGAACGTTCAAGCAG  
CTAAAGGAAAATTGATATTTGGTTGGATTTTTGTGTAACGGACAACGATCAAGGGGCAAG  
TGTACCTGAAACTCGATGCATGTCTACTTATTCTATCAAAATTGTATGTACAGAGCCCTC  
AGAAACATTACACTGTTCAAGCAAGCTCGAAACGACCATGTTGAGCACTTTTGCCCGCTG  
CACTTTATCCATGTGACAAATGTCAGTTGCCGTTGACGGTCAATTCCTGTGCTCCTCATC  
TTCGACAAACTTTTGACCACTTTTGAATCGTTTAACCCACTCAAAACAGTGAGAACAAT  
CATAAAATGATCTTGTTATACCTTACTTAGCATACCAAAAGTTTCGATACAAAGTACATC  
GAGTTTAAACAAAATTCAATGTAAATCTTTGCTCTATCAGTGATCGCATAATGAAAAT  
TGTAGAACGCACCTGACTTACTCGTATTAAAGATGACACAGAATAAACTCTGATCAAAAT  
AAACAAAATCTGTGAATCTATCGTTCTTCGGTATGTTATCAGCTATCAGAAAAGTCCAAG  
GAAACCTAATTTGGCCGCACACTGGGCTAGTTATCACCAAAATCCGGTTTCTAATCTAAC  
AGACCTCGTA

--

>Btmar1.7.36\_gi-1092455033-gb-MAMS01000149\_1-:2244667-2245636  
gi-1092455033-gb-MAMS01000149.1-:2244667-2245636 Bemisia tabaci isolate MEAM1 Scaffold493,  
whole genome shotgun sequence 970 bp

TACGAGGTCTGTTAGATTAGAAACCGGATTTTGGTCATAACTAGCCCACAATGCGTCCAA  
ATTACGTTTTCTTGAGCTTTTCTGATAGCTGAAAATATATTTAAGAACGCTACGTTCA  
AATATGAAAAATCCAAATCAGCTTCGTTGGTATGCGGCTTGAAGTAAGGCAACCTCAAGG  
GTGTTTTGCGATTTTATGTTTGACCGAACTTGTCTCTCTTTTTTCGGTCTTGCACTACA  
TTTTTCAACCCACAAGGACGATTGGAGTTTCGTCTCCATATCGTAGCCGTACACTAAAGG  
ATTGTCACCGAAAATTATCCTATCCAAAAATGTAGGATCATCGTTAGAACGTTCAAACAG

CTAAAGGGAAATTGACATTTGGTTGGATTTTCGTTCAACGGACAACAATCAAGGGGCAAA  
TGTACCTGAAACTCGATGCGTGTCTACATATTCTATCAAAATTGTATGTACAGAACCTTC  
AGAAATAAGACTCTGTTTAACAAGCTCGAAACGACCATTTCCGAGCTTTTTTGGCCGAAC  
CTCTTTCACGTGACAAATGTCAGTTGCCGTTGAGGGTCGATTCCCATGCTCCTCATCTTT  
GACGAACTCCTGACCAGTTTTGAATCGTTTAACCCATTCAAAACAGTGGAACATCTCAT  
ACAATGATCATAGTAACTTTACTTAGCATATACCAAAGTTTCGGTATAAGGTGTACCG  
AGTTTAAAGCATAATTTAATGTTGAATCTTCGCTCTATCAGTGATCGTATGATGAAAATC  
ACAAAACGCACCTGACTTACTCGTATTTAAGATGACACAGAATAAACACTAATCAGAATA  
AACAAAATCTGTGAACGTAGCATTCTTAAGTATATTTCCAGCTATCAGAAAAGCTCAAGA  
AAACCTAATTCGGACGCATTGTGGGCTAGTTATGACCAAATCCGGTTTCTAATCTAACA  
GACCTCGTAT

>Btmar1.7.37\_gi-1092455033-gb-MAMS01000149\_1-:2234593-2235560  
gi-1092455033-gb-MAMS01000149.1-:2234593-2235560 Bemisia tabaci isolate MEAM1 Scaffold493,  
whole genome shotgun sequence 968 bp

TACGAGGTCTGTTAGATTAGAAACCGGATTTTGGTGATAACTAACCCAATGTGCGTCCGA  
ATTAGGTTTTCTTGAGCTTCCCTGATAGCTGGTAATATACTTAAGAACGCTACGTTACA  
CATTTGAAAAATCTTCATTAGCTTTGTTGGTATGTGGGTTGAAGTAAGGCAACCTCATGG  
GTGTTTTGCGATTTTTATGTTTGACCGAACTTGCCCCCTTTTTTCGGTCTTGCACTACA  
TTTTTCAACCCACAAGGATGATTGGAGTTTCGTCTTCATATCGTAGCCGTACACTCAAGT  
GTTTTACCGAAAATCATCCTATCCAAAATGTAGTATCATTGTTAGAACGTTACGCAG  
CTAAAGGGAAATTGACATTTGGTTGGATTTTTGTTCAACGGACAACAATCAAGGGGCAAG  
TGTACCTGCAACTTGATGCATGTCTACATATTCTATCAAAATTGTATGTACAGAGCCCTC  
AGAAATATTACACTGTTTCAGCGAGCTCGAAACGACCATTTTCGAGCACTTTTGGCCGCAC  
TTCTTCCACGTGTCAAAGCCAGTTGCCGTTGATGATCGATTCCCAAGCTCCTCATCTTC  
GACGAACTCCTGACCAGTTTTGAATCGTTTAACCACTTAAACAGTGGAaaaaaACTCAT  
ACAATGATCTTGGTAACTCTACTTAGCATACCAAAGTTTCGGTGCAAGGCATATCGAG  
TTTAAACAAAAGTTAATGTTGAATCTTTGCTCTATCAGTGATCGCATGATGAAAATCGC  
AAAACGCACCTGACTTACTCGTATTCAAGATGACACAGAATAAACACTGATCAAATAAA  
TAAAATATGTAAACGTAGCGTTCTTAAGTATGTTACCAGCTATTAGGAAAGCTCAAGAAA  
ACCTAATTCGGACGAACACTGGGCTAGTTATCACCAAATCCGGTTTCTAATCTAACAGA

CCTCGTAT

--

>Btmar1.7.38\_gi-1092454277-gb-MAMS01000420\_1-:2657335-2658304  
gi-1092454277-gb-MAMS01000420.1-:2657335-2658304 Bemisia tabaci isolate MEAM1 Scaffold1063,  
whole genome shotgun sequence 970 bp

TACGAGGTCTGTTAGATTAGAAACCGGATTTTGGTCATAACTAGCCCACAATGCGTCCAA  
ATTACGTTTTCTTGAGCTTTTCTGATAGCTGGAAATGTACTTAAGAACGCTACGTTCCATA  
AGTTTGAAAAATCCTAATGAGCTTCGTTGGTATGTGGCTTGAAGTAAGGCAACCTCAAGG  
GTGTTTTGCGATTTTTATGTTTCACCGAACTTGTCTCTTTTTTTCGGTCTTGCACTACA  
TTTTTCAACCCACAAGGACGATTGGAGTTTTGTCTCCATATCGTAGCCGTACACTAAAAT  
ATTGTCACCGAAAATTATCCTATCCAAAAATGTAGGATCACTGTTAGAACGTTCAAGCAG  
CTAAAGGGAAATTGACATTTGGTTGGATTATCGTTCAACGGACAACAATCAAGGGGCAAG  
TGTACCTGAAACTCGATGCGTGTCTACATGTTCTATCAAAATTGTATGTACAGAGCCTTC  
AGAAATATTACTCTGTTCAACAAGCTCGAAACGACCGTTTTCGAGCACTTTTGCCCGCAT  
TTCTTCCACGTGACAAATGTCAGTTGCCGTTGAGGGTCGATTCCCATGCTCCTCATCTTT  
GACAAACTCCTGACCAGTTTTGAATCGTTTAACTCATTCAAAACAGTGGGAACATCCCAT  
ACAATGATCATGGTAACTTTACTTAGCGTATACCAAAAGTTTTGGTACAAAGTATACCG  
AGTTTAAACAAAATTTAATGTTGAATCTTTGTTCTATCAGTGATCGCATGATGAAAATC  
GCAAAACGCACCTGACTTACTCGTATTCAAGATGACACAGAATAAACACTGATCAAAATA  
AACAAAATCTGTGAACGTAGCGTTCTTAAGTATATTTCCAGCTATCAGAAGAGCTCGAGA  
AAACGTAATTTAGACGCATTGTGGGGTAGTTATGACCAAAATCCGTTTTCTAATCTAACA  
GACCTCGTAT

--

>Btmar1.7.39\_gi-1092443497-gb-MAMS01005456\_1-:3556357-3557328  
gi-1092443497-gb-MAMS01005456.1-:3556357-3557328 Bemisia tabaci isolate MEAM1 Scaffold3040,  
whole genome shotgun sequence 972 bp

TACGAGGTCTGTTAGATTAGAAACCGGATTTTGTCTATAACTAGCCTACAATGCGTCCAA  
ATTACGTTTTCTTGAGCTTTTCTGATAGCTGAAAATATATTTAAGAACGCTACGTTCCACA  
AATTTGAAAAATCGTAATTAGCTTCGTTGGTATGTGGCTTGAAGTAAGGCAACCTCAAGG



GTGTTTTGCGATTTTATGTTTGACCGAACTTGTCTCTCTTTTTTCGGTCTTGACAACA  
TTTTTCAACCCACAAGGACGATTGGAGTTTCGTCTCCATATCGTAGCCGTACACTAAAGT  
ATTGTCACCGAAAATTATCCTATCCAAAAATGTAGGATCATTGTTAGAACGTTCAAGCAG  
CTAAAGGTAATTTGACATTTGGTTGGATTTTCGTTCAAAGGACAACAATCAAGGGGCAAG  
TGTACCTGAAACTCGATGCGTGTCTACATATTCTATCAAAATTGTATGTACAGAGCCTTC  
AGAAATATGACTTTGTTCAACAAGCTCGAAACGACCATTTTCGAGCACTTTTGCCCGCAT  
TTCTTCCACGTGACAAATGTCAGTCGCCGTTGAGGGTCGATTATTCCCACGCTCCTCATC  
TTTAACGAACTCCTGACCAGTTTGAATCGTTTAACCCATTCAAAACAGTGGGAACATCT  
CATACAATGATCATGGTAAACTTTTCTTAGCATATACCAAAAGTTTCGGTACAAGGTATA  
CCGAGTTGAAAACAAAATTTAGTGTTGAATCTTTGCTCTGTCAGTGATCGCATGCTAAAA  
TCGCAAAACGCACCTGACTTACTCGTATTCAAGATGACACAGAATAAACACTGATCAAAA  
TAAACAAAATCTGTGAACGTAGCGTTCTTAAGTATATTTCCAGCTATCAGGAAAGCTCAA  
GAAAACCTAAATCGGACGCATTGTGGGCTAGTTATGACCAAAATCCGGTTTCTAATCTAA  
CAGACCTCGTAT

>Btmar1.7.40\_gi-1092444300-gb-MAMS01004908\_1-:569463-570431  
gi-1092444300-gb-MAMS01004908.1-:569463-570431 Bemisia tabaci isolate MEAM1 Scaffold2808,  
whole genome shotgun sequence 969 bp

TACGAGGTCTGTTAGATTAGAAACCGGATTTTGGTCATAACTAGCTCACAATGCGTCCAA  
ATTGCGTTTTCTTGAGCTTTTCTGATAGCTGGAAATATACTTAAGAACGCTACGTTACA  
AGTTTGAAAAATCCTAATTAGCTTCGTTGGTATGTGGCTTGAAGTAAGGCAACCTCAAGG  
GTGTTTTGCGATTTTATGTTTCACCGAACTTCTCTCTCTTTTTTTGGTCTTGCACTACA  
TTTTTCAACCCACAAGGACGATTGGAGTTTGTCTCCATATCGTAGCCGTACACTAAAAT  
ATTGTCACCGAAAATTATCCTATCCAAAAATGTAGGATCACTGTTAGAACGTTCAAGCAG  
CTAAAAGGAAATTGACATTTGGTTGGATTTTCGTTCAACGGACAACAATCAAGGGGCAAG  
TGTACCTGAAACTCAATGCGTGTCTACATATTCTATCAAAATTGTATGTACAGAGCCTTC  
AGAAATATTACTCTGTTCAACAAGCTCGAAACGACCGTTTTTCGAGCACTTTTGCCCGCAT  
TTTTTCCACGTGACAAATGTCAGTTGCCGTTGAGGGTCGATTCCCATGCTCCTCATCTTT  
GACGAACTCCTGACCAGTTTTGAATCGTTTAACTCATTCAAAACAGTGGGAACATCTCAT  
ACAATGATCATGGTAAACTTTACTTAGCGTATACCAAAAGTTTCGGTACAAGGTATACCG  
AGTTTAAAACAAAATTTAATGTTGAATCTTTGCTCTATCAGTGATCGCATGATGAAAATC

GCAAAACGCACCTGACTTACTCGTATTCAAGATGACACAGAATAAACACTGATCAAATA  
AACAAAATCTGTGAACGTAGCGTTCTTAAGTATATTTCCAGCTATCAGGAAAGCTCAAGA  
AAACCTAATTTGGACGCATTGTGGGCTAGTTATGACCAAATCCGGTTTCTAATCTAACA  
GACCTCGTA

>Btmar1.7.41\_gi-1092425897-gb-MAMS01019641\_1-:327711-328678  
gi-1092425897-gb-MAMS01019641.1-:327711-328678 Bemisia tabaci isolate MEAM1 Scaffold959, whole  
genome shotgun sequence 968 bp

TACGAGGTCTGTTAGATTAGAAACCGGATTTTGGACATAACTAGCCCACAATGCGTCCAA  
ATTACGTTTTCTTGAGCTTTTCTGATAGCTGAAAATATATTTAAGAACGCTACGTTCA  
AATTTGAAAAATCCTTATTAGCTTTGTTGGTATGTGGCTTGAAGTAAGGCAACCTCAAGG  
GTGTTTTGCGATTTTTATGTTTGACCGAACTTGTCTCTTTTTTCGGTCTTGCACTACA  
TTTTTCAACCCTCGACGACGATTGGAGTTTCGTCTCCACATCGTAGCCGTACACTACGTA  
TTGTCACCGAAAATTATCCGATCCAAAATATAGGATCATTGTTAGAACGTTCAAGCAGC  
TAAAGGGAAATTGACATTTGGTTGGATTTTCGTTCAACGGACAACAATCAAGGGGCAAGT  
GTACCTGGAACCTCGATGCGTGTCTACATATTCTATCAAAATTGTATGTATAGAGCCTTCA  
GAAATATTACTCTGTTCAACAAGCTCGAAACGACCATTTTCGAGCACTTTTGCCCGCACT  
TCTTCTCCGTGACAAATGTCAGTTGCCGTTGAGGGTCGATTCCCATGCTCCTCATCTTTG  
ACGAACTCCTGACCAGTTTTGAATCGTTTAACCCATTCAAGACAGTGGGAACATCTCATA  
CAATGATCATGGTAACTTTACTTAGCATATACCAAAGTTTCGGTACAAGGTATACCGA  
GTTAAAGACAAAATTTAATGTTGAATCTTTGCTCTATCAGTGATCGCATGATGAAAATCG  
CAAAACGCACCTGACTTACTCGTATTCAAGATGACACAGAATAAACACTGATCAAATAA  
ACAAAATCTGCGAACGTAGCGTTCTTATGTATATTTCCAGCTATCAGGAAAGCTCAAGAA  
AACCTAATTCGGACGCATTGTGGGCTAGTTATGACCAAATCCGGTTTCTAATCTAACAG  
ACCTCGTA

--

>Btmar1.7.42\_gi-1092425897-gb-MAMS01019641\_1-:3034930-3035896  
gi-1092425897-gb-MAMS01019641.1-:3034930-3035896 Bemisia tabaci isolate MEAM1 Scaffold959,  
whole genome shotgun sequence 967 bp

TACGAGGTCTGTTAGATTAGAAACCGGATTTTGGTCATAACTAGCCTACTGTGCGTCCGA  
ATTAGGTTTTCTTGATTTTCTGATAGCTGGAAATATACTTAAGAACGCTTCGTTCA

GATTTGAAAAATCTTAATTAGCTTCGTTGGTATGTGGCCTCAAGTACGGCAACCTCATGG  
GTGTTTTGCGATTTTTATGATTGACCGAACTTGTCTCTCTTTTTTCGGTCTTGCACTACA  
TTTTTCAATCTATAAGGATGATTGGAGTTTCGTCTCCGCATCTTAACCGTACCTTCAAGT  
ATTATCACCGAAAATTATCCTATCCAAAAATGTAGGATCATTGTTAGAACGTTCAAGCAG  
CTATAGGGAAATGAACATTTGGTTGGATTTTTGTTCAACGGACAACAATTGAGGGGCAAG  
TGTACCTGAAACTCGACGCATGTCTACATATTGTGTCAAATTTGTATGTACAGAGCCTTC  
AGAAATATTACACTGTTTCAGCAAGCTCGAAACGACCATTTTCGAGACTTTATCCCGCACT  
TCTTCCACGTGACAAATGTTAGTTGCCGTTGATGGTCGATTCCCATGCTCCTCATCTTCA  
ACGAACTCCTGACCAGTTTTGAATCGTTTAACCCACTCAAATAGTGATAACAACCTCATA  
CTATGATCTTGGTAACTTTACTTGGCATACCAAAAGTTTCGGTACAACGTATACCGAGC  
TTAAACAAAATTTAATGTTAAATCTTTGCTCTATCCGTGATCGCATGATGAAAATCGCA  
AAACACCCATGAGGTTGCCGTACTTGAGGCCACGTACCAACGAAGCTAATTAAGATTTTT  
CAACTCTGTGAACGTAGCGTTCTTTAGTATGTTATCAGCTATCAGAAAAGTTCAAGAAAA  
CCTAATTCGGACACACAATAAGCTAGTTATGACCAAAATCCGGTTTCTAATCTAACAGAC  
CTCGTAT

>Btmar1.7.43\_gi-1092427970-gb-MAMS01017568\_1-:1625006-1625975  
gi-1092427970-gb-MAMS01017568.1-:1625006-1625975 Bemisia tabaci isolate MEAM1 Scaffold835,  
whole genome shotgun sequence 970 bp

TACGAGGTCTGTTAGATTAGAAACCGGATTTTGGTCATAACTAGCTCACAATGCGTCCAA  
ATTGCGTTTTCTTGAGCTTTTCTGATAGCTGGAAATATACTTAAGAACGCTACGTTCACA  
AGTTTGAAAAATCCTAATTAGCTTCGTTGGTATGTGGCTTGAAGTAAGGCAACCTCAAGG  
GTGTTTTGCGATTTTTATGTTTCACCGAACTTCTCTCTCTTTTTTTGGTCTTGCACTACA  
TTTTTCAACCCACAAGGACGATTGGAGTTTTGTCTCCATATCGTAGCCGTACACTAAAAT  
ATTGTCACCGAAAATTATCCTATCCAAAAATGTAGGATCACTGTTAGAACGTTCAAGCAG  
CTAAAAGGAAATTGACATTTGGTTGGATTTTCGTTCAACGGACAACAATCAAGGGGCAAG  
TGTACCTGAAACTCAATGCGTGTCTACATATTCTATCAAAATTGTATGTACAGAGCCTTC  
AGAAATATTACTCTGTTCAACAAGCTCGAAACGACCGTTTTTCGAGCACTTTTGCCCGCAT  
TTTTTCCACGTGACAAATGTCAGTTGCCGTTGAGGGTCGATTCCCATGCTCCTCATCTTT  
GACGAACTCCTGACCAGTTTTGAATCGTTTAACCTCATTCAAACAGTGGAACATCTCAT

ACAATGATCATGGTAACTTTACTTAGCGTATACCAAAGTTTCGGTACAAGGTATACCG  
AGTTTAAAACAAAATTTAATGTTGAATCTTTGCTCTATCAGTGATCGCATGATGAAAATC  
GCAAAACGCACCTGACTTGCTCGTATTCAAGATGACACAGAATAAACACTGATCAAAATA  
AACAAAATCTGTGAACGTAGCGTTCTTAAGTATATTTCCAGCTATCAGGAAAGCTCAAGA  
AAACCTAATTTGGACGCATTGTGGGCTAGTTATGACCAAATCCGGTTTCTAATCTAACA  
GACCTCGTAT

>Btmar1.7.44\_gi-1092444418-gb-MAMS01004832\_1-:517603-518572  
gi-1092444418-gb-MAMS01004832.1-:517603-518572 Bemisia tabaci isolate MEAM1 Scaffold2777,  
whole genome shotgun sequence 970 bp

TACGAGGTCTGTTAGATTAGAAACCGGACTTTGGTCATAACTAGCCCTTAATGCGTCCAA  
ATTACGTTTTCTTGAGCTTTTCTGATAGCTGAAAATATATTTAAGAACGCTACGTTCA  
AATTTGAAAAATCCTAATCAGCTTCGTTGGTATGTGGCTTGAAGTAAGGCAACCTCAAGG  
GTGTTTTGCGATTTTTATGTTTGACCGAACTTGTCTCTTTTTTCGGTCTTGCACTACA  
CTTTCAACCCACAAGGACGATTGGAGTTTCGTATCCATATCGTAGCCGTACACTAAAGT  
ATTGTCACCGAAAATTATCCTATCCAAAAATGTAGGATCATTGTTGGAGCGTGCAAGCAG  
CTAAAGGGAAATTGACATTTGGTTGGATTTTCGTTCAACGGACAACAATAAAGGGGCAAA  
TGTACCTGAAACTCAATGCGTGTCTACATATTCTATCAAAATTGTAGGTACAGAGCCTTC  
AGAAATATTACTCTGTTCAACAAGCTCGAAACGACCATTTTCGAGCTTTTTTGCCGAAC  
TTCTTTCACGTGACAAATGTCAGTTGCCGTTGAGGGTCGATTCCCATGCTCCTCATCTTT  
GACGAACTCCTGACCAGTTTTGAATCGTTTAACCCATTCAAACAGTGCAAACATCTCAT  
ACAATGATCATGGTAACTTTACTTAGCATATACCAAAGTTTCGGTACAAGGTATACCG  
AGTTTAAAACAAAATTTAATGTTGAATCTTTGCTCCATCAGTGATCGCATGATGAAAATC  
GCAAAACGCACCTGACTTACTCGTATTCAAGATGACACAGAATAAACACTGATCAAAATA  
AACAAAATCTGTGAACGTAGCGTTCTTAAGTATATTTCCAGCGATCAGGAAAGCTCAAGA  
AAACCTAATTCGGACGCATTGTGGGCTAGTTATGACCAAATCCGGTTTCTAATCTAACA  
GACCTTGTAT

>Btmar1.7.45\_gi-1092425791-gb-MAMS01019747\_1-:177987-178956  
gi-1092425791-gb-MAMS01019747.1-:177987-178956 Bemisia tabaci isolate MEAM1 Scaffold370000,  
whole genome shotgun sequence 970 bp

TACGAGGTCTGTTAGATTAGAAACCGGATTTTGGTCATAACTAGCCCACAATGCGTCCAA  
ATTGCGTTTTCTTGAGCTTTTCTGATAGCTGGAAATATACTTAAGAACGCTACGTTACA  
AGTTTGAAAAATCCTAATTAGCTTCGTTGGTATGTGGCTTGAAGTAAGGCAACCTCAAGG  
GTGTTTTGCGATTTTTATGTTTCACCGAACTTCTCTCTTTTTTTTGGTCTTGCACTAC  
ATTTTCAACCCACAAGGACGATTGGAGTTTTGTCTCCATATCGTAGCCGTACACTAAAA  
TATTGTCACCGAAAATTATCCTATCCAAAAATGTAGGATCACTGTTAGAACGTTCAAGCA  
GCTAAAAGGAAATTGACATTTGGTTGGATTTTCGTTCAACGGACAACAATCAAGGGGCAA  
GTGTACCTGAAACTCAATGCGTGTCTACATATTCTATCAAAATTGTATGTACAGAGCCTT  
CAGAAATATTACTCTGTTCAACAAGCTCGAAACGACCGTTTTCGAGCACTTTTGCCCGCA  
TTTTTCCACGTCACAAATGTCAGTTGCCGTTGAGGGTCGATTCCCATGCTCCTCATCTT  
TGACGAACTCCTGACCAGTTTTGAATCGTTTAACTCATTCAAACAGTGGAACATCTCA  
TACAATGATCATGGTAACTTTACTTAGCGTATACCAAAGTTTCGGTACAAGGTATACC  
GAGTTTAAACAAAATTTAATGTTGAATCTTTGCTCTATCAGTGATCGCATGATGAAAAT  
CGCAAAACGCACCTGACTTACTCGTATTCAAGATGACGCAGAATAAACTGATCAAAAT  
AAACAAAATCTGTGAACGTAGCGTCTTAAGTATATTTCCAGCTATCAGGAAAGCTCAAG  
AAACCTAATTTGGACGCATTGTGGGCTAGTTATGACCAAAATCCGGTTTCTAATCTAAC  
AGACCTCGTA

>Btmar1.7.46\_gi-1092455481-gb-MAMS01000031\_1-:2072681-2073653  
gi-1092455481-gb-MAMS01000031.1-:2072681-2073653 Bemisia tabaci isolate MEAM1 Scaffold17,  
whole genome shotgun sequence 973 bp

TACGAGGTCTGTTAGATTAGAAACCGGATTTTGGTCATAACTAGCCCACAATGCGGCCAA  
ATTACGTTTTCTTGAGCTTTTCTGATAGCTGAAAATATATTTAAGAACGCTACATTCAA  
AATTTGAAAAATCCTAATCAGCTTCGTTGGTATGTGGCTTGAAGTAAGGCAACCTCAAGG  
GTGTTTTGCGATTTTTATGTTTGACCGAACTTGTCTCTTTTTTTCGGTCTTGACGTAC  
TAAATTTTTCAACCCACAAGGACGATTGGAGTTTCGTCTCCATATCGTAGCCGTACACTA  
AAGTATTGTAATCGAAAATTATCCTATCCAAAAATGTAGGATCATTGATAGAACGTTCAA  
GCAGCTAAAGGGAAATTGACATTTGGTTGGATTTTCGTTCAACGGACAACAATCAAGGAG  
CAAGTGATACATGAACTCGATACGTGTCTACATATTCTATCAAAATTGTATGTACAGAGC  
CTTCAGAAATATTACTCTGTTCAACAAGCTTGAAACGACCATTTTCGAGCACTTCTGCCC

GCACTTCTCCACGTGACAAATGTCAGTTGCCGTTGAGGGTCGATTCCCATGCTCCTCAT  
CTTTGACGAACTCCTGACCAGTTTTGAATCGTTTAACCCATTCAAAACAGTGGGAACATC  
TCATACAATGATCATGGTAATTTTAACTAAGCATATACCAAAGTTTCGGTACAAGGTAT  
ACCGAGCTTAAACAAAATTTAATGTTGAATCTTGGCACTATCAGTGATCGCATGATGAA  
AATCGCAAAACGCACCTGACATACTCGTATTCAAGATGACACAGAATAAACTGATCAA  
AATAAACAAAATCTGTGAACGTAGCGTTCTTCAGTACATTTCCAGCTATCAGGAAAGCTC  
AAGAAAACCTAATTCGGACGCATTGTGGGCTAGTTATGACCAAATCCGGTTTCTAATCT  
AACAGACCTCGTA

--

>Btmar1.7.47\_gi-1092455647-gb-MAMS01000007\_1-:9096-10064  
gi-1092455647-gb-MAMS01000007.1-:9096-10064 Bemisia tabaci isolate MEAM1 Scaffold117, whole  
genome shotgun sequence 969 bp

TACGAGGTCTGTTAGATTAGAAACCGGATTTTGGTCATAACTAGCCCACAATGCGTCCAA  
ATTACGTTTTCTTGAGCTTTTCTGATAGCTGAAAATATACTTAAGAACGCTACGTTCA  
AATTTGAAAAATCCTTATTAGCTTCGTTGGTATGTGGCTTGAAGTAAGGCAACCTCAAGG  
GTGTTTTGCGATTTTATGTTTGACCGAACTTGTCTCTCTTTTTTCGGTCTTGCACTACA  
TTTTTCAACCCACGACGATGATTGGAGTTTCGTCTCCACATCGTAGCCGTACACTAAGTA  
TTGTCACCGAAAATTATCCTATCCAAAAATGTAGGATCATTGTTAGAACGTCCAAGCAGC  
TAAAGGGAAATTGACTTTTGGTTGGATTTTCGTTCAACGGACAACAATCAAGGGGCAAGT  
GTACCTGAAACTCGATGCGTGTCTACATATTCTATCAAATTGTATGTATAGAGCCTTCA  
GAAATATTACTCTGTTCAACAAGCTCGAAACGACCATTTTCGAGCACTTTTGCCGCAAC  
TCTTCAACGTGACAAATGTCAGTTGCCCTTGAGGGTCGATTCCCATGCTCCTCATCTTTG  
ACAACTCCTGACCAGTTTTGAATCGTTTGACCCATTCAAGACAGTGGGAACATCTCATA  
CAATGATCATGGTAACTTTACTTAGCATATACCAAAGTTTCGGTACAAGGTATACCGA  
GTTCAAAACAAAATTTAATGTTGAATCCTTGCTCTATCAGTGATCGCATGATGAAAATCG  
CAAAACGCACCTGACTTACTCGTATTCAAGATGACACAGAATAAACTGATCAAAATAA  
ACAAAATCTGTGAACGTAGGGTTCTTATGTATATTTCCAGCTATCAGGAAAGCTCAAGAA  
AACCTAATTCGGACGCATTGTGGGCTAGTTATGACCAAATCCGGTTTCTAATCTAACAG  
ACCTCGTAT

>Btmar1.7.48\_gi-1092455647-gb-MAMS01000007\_1-:273275-274243

gi-1092455647-gb-MAMS01000007.1-:273275-274243 Bemisia tabaci isolate MEAM1 Scaffold117, whole genome shotgun sequence 969 bp

TACGAGGTCTGTTGGATTAGAAACCGGATTTTGGTCATAACTAGCCCACAATGCGTCCAA  
ATTACGTTTTCTTGAGCTTTTCTGGTAGCTGGAAATATACTTAAGAACGCTACGTTCA  
AGTTTGAAAAATCCTAATGAGCTTTGTTGGTATGTGGCTTGAAGTAAGGCAACCTCAAGG  
GTGTTTTGCGATTTTTATGTTTCACCGAACTTGTCTCTCTTTTTTCGGTCTTGCACTACA  
TTTTTCAACCCACGAGGACGATTGGAGTTTTGTCTCCATATCGTTGCCGTACACTAAAAT  
GTTGTCACCGAAAATTATCCTATCCAAAATGTAGGATCACTGTTAGAACGTTCAAGCAG  
CTAAAGGGAAATTGACTTTGGTTGGATTTTTGTTCAACGGACAACAATCAAGGGGCACGT  
GTACCTGAAACTCGATGCGTGTCTATATATTCTATCAAAATTGTATGTACAAAGCCTTCA  
GAAATATTACTCTGTTCAACAAGCTCGAAACGACCGTTTTTCGAGCACTTTTGCCCGCATT  
TCTTCCACGTGACAAATGTCAGTTGCCGTTGAGGGTCGATTCCCATGCTCCTCATCTTTG  
ACGAACTCCTGACCAGTTTTGAATCGTTTAACTCATTCAAACAGTGGAACATCTCATA  
CAATGATCATAGTAACTTTACTTAGCATATACCAAAAGTTTTGGTACAAGGTATACCGA  
GTTTAAACAAAATTTAATGTTGAATCTTTGTTCTATCAGTGATCGCATGATGAAAATCG  
CAAACGCACCTGACTCACTCGTATTCAAGATTACACAGAATAAACTGATCAAAATAA  
ACAAAATCTGTGAACGTAGCGTTCTTAAATATATTCCCAGCTATCAGAAAAGCTCAAGAA  
AACGTAATTTGGACGCATTGTGGGCTAGTTATGACCAAAATCCGGTTTCTAATCTAACAG  
ACCTCGTAT

--

>Btmar1.7.49\_gi-1092450877-gb-MAMS01001951\_1-:23661-24628

gi-1092450877-gb-MAMS01001951.1-:23661-24628 Bemisia tabaci isolate MEAM1 Scaffold16276, whole genome shotgun sequence 968 bp

TACGAGGTCTGTTAGATTAGAAACCGGATTTTGGTCATAACTAGCCCACAATGCGTCCAA  
ATTACGTTTTCTTGAGCTTTTCTGATAGCTGAAAATATATTCAAGGACGCTACGTTCA  
AATTTGAAAAATCCTTATTAGCTTCGTTGGTATGTCGCTTGAAGTAAGGCAACCTCAAGG  
GTGTTTAGCGATTTTTATGTTTGATCGAACTTGTCTCTCTTTTTTCGGTCTTGCACTACA  
TTTATCAACCCACGACGACGATTGGAGTTTCGTCTTCACATCGTAGCCATACACCAAGTA

TTGTCACCGAAAATTATCCTATCCAAAAATGTAGGATCATTGTTAAAACGTTCAAGCAGC  
TAAAGGGAAAATTGACATTTGGTTGGATTTTCGTTCAACGGACAACAATCAAGGGGCAAGT  
GTACCTGAAACTCGATGCGTGTCTACATATTCTATCAAAATTGTATGTATAGAGCCTTCA  
GAAATATTACTCTGTTCAACAAGCTCGAAACGACCATTTTCGAGCACTTTTGCCACATT  
TCTTCCACGTGACAAATGTCAGTTGCCGTTGAGGGTCGATTCCCATGCTCCTCATCTTTG  
ACGAACTCCTGACCAGTTTTGAATCGTTTAACCCATTCAAGACAGTGGGAACATCTCATA  
CAATGATCATGGTAAACTTTACTTAGCATATACCAAAGTTTCGGTACAAGGTATACCGA  
GTTTAAAACAAAATTTAATGTTGAATCTTTGCTCTATCAGTGATCGCATGATGAAAATCG  
CAAAACGCACCTGACTTAGTCGTATTCAAGATGACACAGAATAAACACTGATCAATATAA  
ACAAAATCTGTGAACGTAGCGTTCTTAAGTATATTTTCAGCTATCAGAAAAGCTCAAGAA  
AACCTAATTCGAACGCATTGTGGGCTAGTTATGACCAAAATCCGGGTTCTAATCTAACAG  
ACCTCGTA

--

>Btmar1.7.50\_gi-1092450877-gb-MAMS01001951\_1:-5780477-5781445  
gi-1092450877-gb-MAMS01001951.1:-5780477-5781445 Bemisia tabaci isolate MEAM1 Scaffold16276,  
whole genome shotgun sequence 969 bp

TACGAGGTCTGTTAGATTAGAAACCGGATTTTGGTCATAACTAGCCTACAATGCGTCCAA  
ATTACGTTTTCTTGAGCTTTTTTGATAGCTGAAAATATATTTAAGAACGCTACGTTCA  
AATTTGAAAAATATTAATTAGCTTCGTTGGTATATGGCTTGATGTAAGGCAACCTCAAGG  
GTGTTTTGCGATTTTTATGTTTGACTGAACTTGCTCTCTTTTTTTGGTCTTGACAACA  
TTTTTCAACCCACAAGGACAATTGGAGTTTCGCTCCATATCGTAGCCATAAACTAAAGT  
ATTGTCACCGAAAATTATCCTATCCAAAAATGTAGGATTATTGTTAGAACGTTCAAGCAG  
CTAAAGGAAATATGACATTTGGTTGGATTTTCGTTCAACGGACAACAATCAAGGGGCAAG  
TGACCTGAAACTCGATGCAAGTCTACATATTCTATCAAAATTGTATGTACAGAGCCTTT  
AGAAATATTACTCTGTTCAACAATCTCGAAACGACCATTTTCGAGCACTTTTGCCCGCAT  
TTCTTCCACGTGACAAATGTCAGTCGCCGTTGAAGGTCGATTCCCATGCTCCTCATTTTT  
GACGAACTCCTGACCAGTTTTGAATCGTTTAACCCATTCAAAACAGTGGGCGCATCTCAT  
ACAATGATCATGGTAAACTTTTCTGGCATATACCAAAGTTTCGGTACAAGGTATACCG  
AGTTTAAAACAAAATTTAATGTTGAATCTTTGCTCTGTCTGATGATCGCATGCTAAAATCG  
CAAAACGCACCTGACTTACTCGTATTCAAGATGACACAGAATACACACTGATCAAAATAA



ACAAAATCTGTGAACGTAGCGTTCCTAAGTATATTTTCAGCTATCAGGAAAGCTCAAGAA  
AACCTAATTCAGACGCATTGTGGGCTGGTTATGACCAAAATCCGGTTTCTAATCTAACAG  
ACCTGGTAT

--

>Btmar1.7.51\_gi-1092441835-gb-MAMS01006152\_1-:686713-687686  
gi-1092441835-gb-MAMS01006152.1-:686713-687686 Bemisia tabaci isolate MEAM1 Scaffold3332,  
whole genome shotgun sequence 974 bp

TACGAGGTCTGTTAGATTAGAAACCGGATTTTGGTCATAACTAGCCCACAATGCGTCCAA  
ATTACGTTTTCTTGAGCTTTTCTGATAGCTGAAAATATATATAAGAACGCTACGTTCAA  
AATTTGAAAAATCCTAATCAGCTTCGTTGGTATGTGGCTTGAAGTAAGGCAACCTCAAGG  
GTGTTTTGCGATTTTTATGTTTGACCGAACTTGTCTTTCTTTTTTCGGTCTTGACGTAC  
TAAATTTTCAACCCACGAGGACGATTGGAGTTTCGTCTCCATATCGTAGCCGTACACTA  
AAGTATTTTAATAGAAAATTATCCTATCCAAAAATGTAGGATCATTGATAGAACGTTCAA  
GCAGCTAAAGGGAAATTGGCATTGTTGGATTTCGTTCAACGGACAACAATCAAGGGG  
CAAGTGACCTGAACTCGATACGTGTCTACATATTCTATCAAAATTGTATGTACAGAGC  
CTTCAGAAATATTACTCTGTTCAACAAGCTTGAAACGACCATTTTCGAGCGCTTCTGCCC  
GCACTTCTCCACGTGACAAATGTCAGTTGCCGTTGAGGGTCGATTCCCATGCTCCTCAT  
CTTTGACGAACTCCTGACCAGTTTTGAATCGTTTAACCCATTCAAAACAGTGGAACATC  
TCATACAATGATCATGGTAACTTAAGCATATACCAAAAGTTTCGGTACAAGGTAT  
ATCGAGCTTAAACAAAAATTTAATGTTGAATATTTGCACTATCAGTGATCGCATGATGAA  
ATTCGCAAAACGCACCTGACTTACTCGTATTCAAGATGACACAGAATAAAGACTGATCAA  
AATAAACGAAATCTGTGAACGTAGCGTTCTTAAGTATATATTCAGCTATCAGGAAAGCTC  
AAGAAAACCTAATTCGGACGCATTGTGGGCTAGTAATGACCAAAATCCGGTTTCTAATCT  
AACAGACCTCGTAT

--

>Btmar1.7.52\_gi-1092455371-gb-MAMS01000058\_1-:2971296-2972264  
gi-1092455371-gb-MAMS01000058.1-:2971296-2972264 Bemisia tabaci isolate MEAM1 Scaffold232,  
whole genome shotgun sequence 969 bp

TACGAGGTCTGTTAGATTAGAAACCGGATTTTGGTCATAACTAGCCCACAATGCGTCCAA  
ATTACGTTTTCTTGAGCTTTTCTGATAGCTGAAAATATGTTTAAGAAGTTACGTTCA

AATTTGAAAAATCCTAATTAGCTTCGTTGGTATGTGGCTTGAAGTAAGGCAACCTCAAGG  
GTGTTTTGCGATTTTTATGTTTGCCCGAACTTGTCTCCCTTTTTTCGGTCTTGCACTACA  
TTTTTCAACCCACAAGGACGATTGGAGTTTCGTCCCATATCGTAGCCGTACACTACAGT  
ATTTTCACCGAAAAATTATCCTATCCAAAAATGTAGGATCATCGTTAGAACGTTCAAGCAG  
CTAAAGGGAAAAATGACATTTGGTTGGATTTTCGTTCAACGGACAACAATCAAGGGGCAAG  
TGTACCTGAAACTCGATGCGTGTCTACATATTCTATCAAAATTGTATGTACAGAGTTTTTC  
AAAAATATTACTCTGTTCAACAAGCTCGAAACGACCATTTTCGAGCTCTTTTGCCCGCAC  
TTCTTCCACGTGACAAATGTCAGTTGCCGTTGAGGGTCGATTCCCATGCTCCTCATCTTT  
GACGAACTCCTGACCAGTTTTGAATCGTTTAACCCATTCAAACAGTGGAACATCTCAT  
GCAATGATCATGGTAAACTTTACTTAGCATATACCAAAGTTTCGGTACAAGGTGTACCG  
AGTTTAAAACAAAATTTAATGTTGAATATTTGCTCTGTCAGTGATCGCATGATGAAAATC  
GCAAAACGGACCTGACTTACTCGTATTCAAGATGACACAGATTAAACACTGATCAAAATA  
AACAAAATCTGTGAACGTAGCGTTCTTAAGTATATTTCCAGCTATCAGAAAAGCTCAAAG  
AAACCTAATTCGAACGCATTGTGGGCTAGTTATGACCAAAATCCGTTTCTAATCTAACA  
GACCTCGTA

--

>Btmar1.7.53\_gi-1092434109-gb-MAMS01011429\_1-:173020-173986  
gi-1092434109-gb-MAMS01011429.1-:173020-173986 Bemisia tabaci isolate MEAM1 Scaffold5599,  
whole genome shotgun sequence 967 bp

TACGAGGTCTGTTAGATTAGAAACCGGATTTTGGTCATAACTAGCCCACAATGCGTCCAA  
ATTACGTTTTCTTGAGCTTTTCTGATAGCTGAAAATATATTTAAGAACGCTACGTTTACA  
AATTTGAAAAATCATAATTAGCTTTGTTGGTATGTGGCTTGAAGTAAGGCAACCTCAAGG  
GTGTTTTGCGATTTTTATGTTTGACCGAACCTGTCTCTTTTTTCGGTCTTGCACTACA  
TTTTTCAACCCACAAGGACGATTGGAGTTTCGTCTCCATATCGTAGCCGTACACTAAAGT  
ATTGTCACAGAAAATTATCCTATCCAAAAATGTAGGACCATTGTTAGAACGTTCAAGCAG  
CTAAAGGGAAATTGACATTTGGTTGGATTTTCGTTCAACGGACAACAATCAAGGGGTAAG  
TGTACCTGAAACTCGATGCGTGTCTACATATTCTATCAAAATTGTATGCACATAGCCTTC  
AGAAATATTACTCTGTTCAACAAGCTCGAAACGACCATTTTCGAGCACTTTTGCCCGCAC  
TTCTTCCACGTGACGAATGTCAGTTGCCGTTGAGGGTAGATTCCCATACTCCTCATCTTC  
GACGAACTCCTGACCAGTTTTGAATCGTTTAACCCACTCAAACAGTGGAACATCTCAT

ACAATGATCTTGGTAAACTTTACTTAGCATACCAAAAGTTTCGGTACAAGGTATACCGAG  
TTTAAAACAAAATTAAATGTTGAGTCTTTGCTCTATCAGTGATCGCATGCTGAAAATCGC  
AAAACGCACCTGACTTACTTGTATTCAAGATGACACAGAATAAACACTGATCAAAATAAA  
CAAAATCCGTGAACGTAGCGTTCTTAAGTATATTTTCAGCTATCATAAAAGCTCAAGAAA  
ACCTAATTCGGACGCATTGTGAGCTAGTTATGACCAAAATCCGGTTTCTAATCTATCAGA  
CCTCGTA

--

>Btmar1.7.54\_gi-1092425788-gb-MAMS01019750\_1-:3238735-3239704  
gi-1092425788-gb-MAMS01019750.1-:3238735-3239704 Bemisia tabaci isolate MEAM1 Scaffold231,  
whole genome shotgun sequence 970 bp

TACGAGGTCTGTTAGATTAGAAACCGGATTTTGGTCATAACTAGCCCAAATGCGTCCAA  
ATTACGTTTTCTTGAGCTTTTCTGATAGCTGAAAATATACTTAAGAATGCTACGTTCA  
AATTGAAAAATCCTAATTAGCTTCGTTGGTATGTGGCTTGAAGTAAGGCAACCTCAAGG  
GTATTTTGCATTTCATGTTTGACCGAACTTGTCTCTTTTTTTCGGTCTTGCATTACA  
TTTTTCAACCCACAAGGACGATTGGAGTTTCGTCTCCATGTCGTAGCCGTACACTAAAGT  
GTTGTCACTGAAAATTATCCTATCCAAAAATGTAGGATCATTGTTAGAACGTTCAAGCAG  
CTAAAGGGAAATTGACATTTGGTTGGATTTTCGTTCAACGGACAGCAATCAAGGGGCAAG  
TGTACCTGAACTCGATGCGTGTCTACATATTCTATCAAAATTGTACGTACAGAGCCTTC  
AGAAATATTACTCTGTTCAACAAGCTCGAAACGACCATTTTCGAGCACTTTTGCCCGCAC  
TTCTTCCACGTGACAAATGTCAGTTGCCGTTGAGGGTATATTCCCATGCTCCTCATCTTT  
GACGAACCCCTGACCAGTTTTGAATCGTTTAACCCATTCAAAACAGTGGGAACATCTCAT  
ACAATGATCATGGTAAACTTTACTTAGCATATACCAAAAGTTTTGGTGCAAGGTATACCG  
AGTTTAAAACAAAATTTAATGTTGAATCTTTGTTCTATCAGTGATCGCATGATAAAATC  
GCAAAACGCACCTGACTTACTCGTATTCAAGATGACACAGAATAAGCACTGATCAGGATA  
AACAAAATCTGTGAACATAGCGTTCTTAAGTATATTTCCAGCTATCAAGAAAGCTCAAGA  
AAACCTAATTCGGACGCATTGTGGGCTAGTTATGACCAAAATCCAGTTTCTAATCTAACA  
GACCTCGTAT

>Btmar1.7.55\_gi-1092445325-gb-MAMS01004396\_1-:175009-175978  
gi-1092445325-gb-MAMS01004396.1-:175009-175978 Bemisia tabaci isolate MEAM1 Scaffold2605,  
whole genome shotgun sequence 970 bp

TACGAGGTCTGTTAGATTAGAAACCGGATTTTGGTCATAACTAGCCCACAATGCGTCCAA  
ATTACGTTTTTTTGAGCTTTTCTGAAAGCTGAAAATATATTTAAGAACGCTACGTTCA  
AATTTGAAAAATCTTAATTAGCTTCGTTGGTATGTGACTTGAAGTAAGGCAACCTCAAGG  
GTGTTTTGCGATTTTTGTGTTTGACCGAACTTGTCTCTCTTTTTTCGGTGTGCACTACA  
TTTTTCAACCCACAAGGACGATCGGAGTTTCGTCTCCATATCGTAGCCGCACACTGAAGT  
ATTGTCACCGATAATTACCCTATCCAAAAATGTAGGATCATTGTTAGAACGTTCAAGCAG  
CTAAAGGGAAATTGACATTTGGTTGGATTTTCGTTCAACGGACAACAATCAAGGGGCAAG  
TGTACCTGAAACTCGATGCATGTCTACATATTCTATCAAAATTGTATGTACAGAGCCTTC  
AGAAATATTACTCTGTTCAACAAGCTCGAAACGACCATTTTCGAGCACTTTTGCCCGCAC  
TTCTTCCACGTGACAAATGTCAGTTGCCGTTGAGGGTCGATTCCCATACGCTTCATCTTT  
GACGAACTCCTGACCAGTTTTGAATCGTTTAACCCATTCAAACATTGGGAACATCTCAT  
ACAATGATCATGGTAACTTTACTTAGCATATACCAAAGTTTTGGTACAAGGTACACCG  
AGTTCAAAACAAAATTTAATGTTGAATCTTTGCTCTATCAGTGATCGCATGATGAAAAGC  
GCAAAACGCACCTGACTTACTCGTATTCAAGATGACACAGAATAAACTGATCAAAATA  
AACAAAATCTGTGAACGTAGCGTTCTTAAATATATTTCCACCTATCAGGAAAGCTCAAGA  
AAACCTAATTCGGACGCATTGTGGGCTAGTTATGACCAAAATCCGTTTCTAATCTAACA  
GACCTCGTAT

>Btmar1.7.56\_gi-1092445325-gb-MAMS01004396\_1-:4468930-4469897  
gi-1092445325-gb-MAMS01004396.1-:4468930-4469897 Bemisia tabaci isolate MEAM1 Scaffold2605,  
whole genome shotgun sequence 968 bp

TACGAGGTCTGTTAGATTAGAAACCGGATTTTGGTCATAACTAGCCCACAATGCGTCCAA  
ATTACGTTTTCTTGAGCTTTTCTGATAGCTGAAAATATATTTAAGAACGCTACGTTCA  
AATTTGAAAAATCATAATTAACTTTGTGTTGGTATGTGGCTTGAAGTAAGGCAACCTCAAGG  
GTGTTTTGCGATTTTTATGTTTGACCGAACTTGTCTCTCTTTTTTCGGTCTTGCACTACA  
TTTTTCAACCCACAAGGACGATTGGAGTTTCGACTCCATATCGTAGCCGTACACTAAAGT  
ATTGTCACCGAAAATTATCCTATCCAAAAATGTAGGATCATTGTTAGAACGTTCAAGCAG  
CTAAAGGGAAATTGACATTTGGTTGGATTTTCGTTCAACGGACAACAATCAAGGGGCAAG  
TGCACCTGAAACTCGATGCGTGTCTACATATTCTATAAAAATTGTATGTACATAACCTTC  
AGAAATATTACTCTGTTCAACAAGCTCGAAACGACCATTTTCGAGCACTTTTACCCGCAC  
TTCTTCCACGTGACAAATGTCAGTTGCCGTTGAGGGTAGATTCCCATACTCCTCATTTTC

GACGAACTCCTGACCAGTTTTGAATCGTTTAACCCACTCAAAACAGTGGGAACATCTCAT  
ACAATGATCTTGGTAAACTTTACTTAGCATACCAAAAGTTTCGGTACAAGGTATACCGAG  
TTTAAACAAAATTAAATGTTGAGTCTTTGCTCTATCAGTGATCGCATGCTGAAAATCGC  
AAAACGCACCTGACTTACTCGTATTCAAGATGACACAGAATAAACATTGATCAAAATAAA  
CAAAATCTGTGAACGTAGCGTTCTTAAGTATATTTCCAGCTATCATAAAATCTCAAGAAA  
ACCTAATTCGGACGCATTGTGGGCTAGTTATGACCAAAATCTGGTTTCTAATCTAACAGA  
CCTCGTAT

>Btmar1.7.57\_gi-1092445325-gb-MAMS01004396\_1:-921861-922829  
gi-1092445325-gb-MAMS01004396.1:-921861-922829 Bemisia tabaci isolate MEAM1 Scaffold2605,  
whole genome shotgun sequence 969 bp

TACGAGGTCTGTTAGATTAGAAACCGGATTTTGGTCATAACTAGCCCACAATGCGTCCAA  
ATTACGTTTTCTTGAGCTTTTCTGATAGCTGGAAATATACGTAAGAACGGTACGTTTACA  
AGTTTGAAAAATCCTAATGAGCTTCGTTGGTATGTGGCTTGAAGTAAGGCAACCTCAAGG  
GTGTTTTGCGATTTTATGTTTCACCAAATGTATCTCTTTTTTCGGTCTTGCACTACA  
TTTTTCAACCCACAAGGACGATTGGAGTTTTGTCTCCATATCGTAGCCGTACACTAAAAT  
ATTGTCACCGAAAATTATCCTATCAAAAAATGTAGGATCACTGTTAGAACGTTCAAGCAG  
CTAAAGGGAAATTGACGTTAGGTTGGATTTTCGTTCAACGGACAACAATCAAGGGGCAAG  
TGTACCTGAAACTCGATGCGTGTCTACATATTCTATCAAAATTGTATGTACAGAGCCTTC  
AGAAATATTACTCTGTTCAACAAGCTCGAAACGACCGTTTTTCGAGCACTTTAGCCCGCAT  
TTCTTCCACGTGACAAATGTCAGTTGCCGTTGAGGGTCGATTCCCATGCTCCTCATCTTT  
GACGAACTCCTGACCAGTTTTGAATCGTTTAACCTCATTTAAACAGTGGGAACATCTCAT  
AAAATGATTATGGTAAACTTTACTTAGCGTATACCAAAAGTTTTGGTACAAGGTATACCG  
AGTTTAAACAAAATTTAATGTTGAATCTTTGTTCTATCAGAGATCGCATTATGAAAATC  
GCAAAACGCACCTGACTTACTCGTATTCAAGATGACACAGAATAAACACTGATCAAAATA  
AACAAAATCTGTGAACGTAGCGTTCTAAAGTATATTTTCAGCTATCAGAAAAGCTCAAGA  
AAACGTAATTTGGACGCATTGTGGGCTAGTTATGACCAAAATCCGTTTCTAATCTAACA  
GACCTCGTA

>Btmar1.7.58\_gi-1092445325-gb-MAMS01004396\_1:-4487056-4488029  
gi-1092445325-gb-MAMS01004396.1:-4487056-4488029 Bemisia tabaci isolate MEAM1 Scaffold2605,  
whole genome shotgun sequence 974 bp

TACGAGGTCTGTTAGATTAGAAACCAGATTTTGGTCATAACTAGCCTACTGTGCGTCCGA  
ATTAGGTTTTCTTGATCTTTCCTGATAGCTGGAAATATACTTAAGAACGCTACGTTACACA  
GATTTGAAAAATCCTAATTAGCTTCGTTGGTATGTGGCTTCAAGTACCTCCAAGAAAACC  
TCATGGGTGTTTTGCGATTTTCATATTTGACCGAACTTGTCTCTCTTTTATCTGTCTTGC  
ACTAAATTTTTCAACCCACAGGTATGATAGGAGTTTCGTTTTCATATCGTAGCCGTACAC  
TCAAGTATTATCACCGAAAATTATCCTATCCAAAAATGTAGGATCATTGTTAGAACGTTT  
AAGCAGCTATAGGGAAATTAACATTGTGTTGGATTTTTGTTCAACGGACAACAATCAAGG  
GACAAGTGACCTGAAACTCGATGCATGTCTACATATTCTATCAAAATTGTATGTACAGA  
GTCTTCAGAAATATATTTAAATGTTTAGCAAGCTCAAAACGACCATTTTCGAGACTTTTG  
GCCGCACTTCTTCCACGTGACAAATGTTAGTTGCCGTTGATGGTCGATTCCCATGCTCCT  
CATCTTCAACGAACTCCTGATCAATTTGAATCGTTTAACCCATTCAAAATAGTGAGAAC  
AACTCATTCAATGATCTTGGTATACTTTACTTAGCATACCAAAAGTTTCAGTACAAGGTA  
TACCGAGCTTAAACAAAATTTAATGTTAAATCTTTGCTCTATCAGAGATCGCATGATGA  
ATATCGCAGAACGCACCGGGCTTCCTCTTATTCAAGATTACACAGAATGAACACTGATCA  
AAATAAACAAAATCTCTGAACATAGCGTTCTTTAGTATGTTATCAGCTATCAGAAAAGTC  
CAAGAAAACCTAATGCGGACGCACGATAAGCTAGTTATGACCAAAATCCAGTTTCTAATC  
TAACAGACCTCGTA

--

>Btmar1.7.59\_gi-1092427769-gb-MAMS01017769\_1-:541400-542369

gi-1092427769-gb-MAMS01017769.1-:541400-542369 Bemisia tabaci isolate MEAM1 Scaffold844, whole genome shotgun sequence 970 bp

TACGAGGTCTGTTAGATTAGAAACCGGATTTTGGTCATAACTAGCCCACAATGCGTCCAA  
ATTAAGTTTTCTTGAGCTTTTCTGTTAGCTGAAATTATATTCAAGAACGCTACGTTACACA  
TATTTGAAAAATCCTAATTAGCTTCGTTGGTATGTGGCTTGAAGTAAGGCAACCTCAAGG  
GTGTTTTGCGATTTTTATGTTTGACCGAACTTGTCTCTTTTTTTCGGTCCTGCACTACA  
TTTTTCAACCCACATGGACGATTGGAGTTTCGTCTCCATACCGTAGCTTTACACTAAAGT  
ATTGTCACCGAAAATTATCCTATCCAAAAATGAAGAATCATTGTTAGAACGTTCAAGCAG  
CTGAAGGGAAATTGACATTTGGTTGGATTTTCGTCCAATGGACAACAATCACGGGGCAAG  
TGTAACCTGAAACTCGATGCGTGTCTACATATTCTATCAAAATTGTATGTAAAGAGCCTTC

AGAAATATTACTCTGTTCAACAAGCTCGAAACGACCATTTTCGAGCACTTTTGCCCGCAC  
TTCTTCCACGTGACAAATGTCAGTTGCCGTTGAGGGTCGATTCCCATGCTCCTCATCTTG  
GATGAACGCCTGACTAGTTTTGAATCGTTTAACCCATTTAAAACAGTGGGAACATCTAAT  
ACAATGATCATGGTAAATTTATTTAGCATATACCAAAGTTTCGGTACAAGGTATACCG  
AGTTTAAAACAAAATTTAATGTTGAATCTTCACTCTATCAGTGATCGCATGATGAAAATC  
GTAAACGCACCTGACTTACTCGTATTCGAGATGACACAGAATAGACACTGATCAGTATA  
AACAAAATCTGTGAACGTAGCGTTCTTAAGTATATTTCCAGCTATCAGGAAAGCTCAAGA  
AAACCTAATTCGAACGCATTGTGGGCTAGTTATGACCAAATCCGGTTTCTAATCTAACA  
GACCTCGTAT

--

>Btmar1.7.60\_gi-1092455019-gb-MAMS01000152\_1-:2232980-2233947  
gi-1092455019-gb-MAMS01000152.1-:2232980-2233947 Bemisia tabaci isolate MEAM1 Scaffold499,  
whole genome shotgun sequence 968 bp

TACAAGGTCTGTTAGATTAGAAACCGGATTTTGGTCATAACTAGCCCACAATGCGTCCAA  
ATTACGTATTCTTGAGCTTTTCTGATAGCTGAAAATATATTTAAGAACGCTACGTTCA  
AATTTGAAAAATCATAATTAGCTTTGTTGGTATGTGGCTTGAAGTAAGGCAACCTCAAGG  
GTGTTTTGCGATTTTTATGTTTGACCGAACTTGTCTCTTTTTTTCGGTCTTGCACTACA  
TTTTTCAACCCACAAGGACGATTGGAGTTTCGTCTTCATATCGTAGCCGTACACTAAAGT  
ATTGTCACAGAAAATTATCCTATCCAAAATGTAGGATCATTGTTAGAACGTTCAAGCAG  
CTAAAGGGAAATTGACATTTGGTTGGATTTTCGTTCAACGGACAACAATCAAGGGGTAAG  
TGTACCTGAAACTCGATGCGTGTCTACATATTCTATCAAAATTGTATGCACATAGCCTTC  
AGAAATATTACTCTGTTCAACAAGCTCGAAACGACCATTTTCGAGCACATTTGCCCGCAC  
TTCTTCCGCGTGACGAATGTCAGTTGCCGTTGAGGGTAGATTCCCATACTCCTCATCTTC  
GACGAACTCCTGACCAGTTTTGAATCATTTTACCACTCAAACAGTGGGAACATCTCAT  
ACAATAATCTTGGTAACTTTACTTAGCATACCAAAGTTTCGGTACAAGGTATACCGAG  
TTTAAAACAAAATTAATGTTGAGTCTTTGCTCTATCAGTGATCGCATGCTGAAAATCGC  
AAAACGCACCTGACTTACTTGTATTCAAGATGACACAGAATAAACACTGATCAAAATAAA  
CAAAATCTGTGAACGTAGCGTTCTTAAGTATATTTTCAGCTATCATAAAAGCTCAAGAAA  
ACCTAATTCGGACGCATTGTGAGCTAGTTATGACCAAATCCGGTTTCTAATCTAACAGA

CCTCGTAT

--

>Btmar1.7.61\_gi-1092436257-gb-MAMS01009281\_1-:57-1026

gi-1092436257-gb-MAMS01009281.1-:57-1026 Bemisia tabaci isolate MEAM1 Scaffold46601, whole genome shotgun sequence 970 bp

TACCAGGTCTGTTAGATTAGAAACCGGATTTTGGTCATAACTAGCCTACAATGCGTCCAA  
ATTACGTTTTCTTGAGCTTTTCTGATAGCTGAAAATATATTTAAGAACGCTACGTTCAACA  
AATTTGAAAAATCCTAATTAGCTTCGTTGGTATGTGGCTTGAAGTAAGGCAACCTCAAGG  
GTGTTTTGCGATTTTTATGTTTGACCGAACTTGTCTCTCTTTTTTCGGTCTTGCAACAACA  
TTTTTCAACCCACAAGGACGATTGGAGTTTCGTCTCCATATCGTAATCGTACACTAAAGT  
ATTGTCACCGAAAATTATCCTATCCAAAAATGTAGGATCATTGTTAGAACGTTCAAGCAG  
CTAAAGGTAATTTGACATTTGGTTGGATTTTCGTTCAAAGGACAACAATCAAGGGGCAAG  
TGTACCTGAAACTCGATGCGTGTCTACATATTCTATCAAAATTGTATGTACAGAGCCTTC  
AGAAATATGACTTTGTTCAACAAGCTCGAAACGACCATTTTCGAGCACTTTTGCCCGCAT  
TTCTTCCACGTGACAAATGTCAGTCGCCGTTGAGGGTCGATTCCCACGCTCCTCATCTT  
TAACGAACTCCTGACCAGTTTTGAATCGTTTAACCCATTCAAACAGTGGGAACATCTCA  
TACAATGATCATGGTAACTTTTCTTAGCATATACCAAAGTTTCGGTACAAGGTATACC  
GAGTTTAAACAAAATTTAATGTTGAATCTTTGCTCTGACAGTGATCGCATGCTAAAATC  
GCAAAACGCACCTGACTTACTCGTATTCAAGATGACACAGAATAAACACTGATCAAAATA  
AACAAAATCTGTGAACGTAGCGTTCTTAAATATATTTCCAGCTATCAGGAAAGCTCAAGA  
AAACCTAAATCGGACGCATCGTGGGCTAGTTATGACCAAATCCGGTTTCTAATCTAACA  
GACCTCGTAT

--

>Btmar1.7.62\_gi-1092454785-gb-MAMS01000211\_1-:1393725-1394694

gi-1092454785-gb-MAMS01000211.1-:1393725-1394694 Bemisia tabaci isolate MEAM1 Scaffold651, whole genome shotgun sequence 970 bp

TACGAGGTCTGTTAGATTAGAAACCGGATTTTGGTCTTAACCAGCCCACAATGCGTCCAA  
ATTACGTTTTCTTGAGCTTTTCTGATAGCTGGAAATATACTTAAGAACGCTACGTTCAACA  
AGTTTGAAAACCTCCTAATGAGCTTCGTTGGTATGTGGCTTGAAGTAAGGCAACCTCAAGG



GTGTTTTGCGATTTTATGTTTCACCGAACTTGCTCTCTTCTTCGGTCTTGCACTACA  
TTTTTCAACCCACAAGGACGATTGGAGTTTTGTCTCCATATCGTAGCCGTTCACTAAAAT  
ATTGTCACCGAAAATTATCCTATCCAAAAATGTAGGATCACTGTTAGAACGTTCAAGCAG  
CTAAAGGGAAATTGACATTTGGTTGGATTTTCGTTCAACGGACAACAATCAAGGGACAAG  
TGTACCTGAAACTCGATGCGTGTCTACATATTCTATCAAAATTGTATGTACAGAGCCTTC  
AGAAATATTACTCTGTTCAACAAGCTCAAAACGACCGTTTTCGAGCACTTTTGCCCGCAT  
TTCTTCCACGTGACAAATGTCGGTTGCCGTTGAGGGTCGATTCCCATGCTCCTCATCTTT  
GACGAACTCCTGACCAGTTTTGAATCGTTTAACTCATTCAAAACAGTGGGAACATCTCAT  
ACAATGATCATGGTAACTTTACTTAGCGTATACCAAAGTTTTGGTACAAGGTATACCG  
AGTTTAAAACAAAATTTAATGTTGAATCTTTGTTCTATCAGTGATCGCATGATGAAAATC  
GCAAAACGCACCTGACTTACTCGCATTCAAGATGACACAGAATAAACACTGATCAAAATA  
AACAAAATCTGTGAACGTAGCGTTCTTAAGTATATTTCCAGTTATCAGAAAAGCTCAAGA  
AAACGTAATTTGGACGCATTATGGGCTAGTTATGACCAAATCCGTTTCTAATCTAACA  
GACCTCGTAT

--

>Btmar1.7.63\_gi-1092443959-gb-MAMS01005201\_1-:173132-174100  
gi-1092443959-gb-MAMS01005201.1-:173132-174100 Bemisia tabaci isolate MEAM1 Scaffold29348,  
whole genome shotgun sequence 969 bp

TACGAGGTCTGTTAGATTAGAAACCGGATTTTGGTCATAACTAACCCACAATGCGTCCAA  
ATTACGTTTTCTTGAGCTTTTCTGATAGCTGGAAATATACTTAAGAACGCTACGTTCATA  
AGTTTGAAAAATCTTAAAGAGCTTCGTTGGTATGTGGCTTGAAGTAAGGTAACCTCAAGG  
GTGTTTTGCGATTTTATGTTTCACCGAACTTGCTCTCTTTTTTCGGTCTTGCACTACA  
TTTTTCAACCCACAAGGACGATTGGAGTTTTGTCTTCATATCGTAGCCGTACACTAAAAT  
ATTGTCACCGAAAATTATCCTATCCAAAAATGTAGGATCACTGTTAGAACGTTCAAGCAG  
CTAAAGGGAAATTGACATTTGGTTTGATTTTCGTTCAACGGACAACAATCAAGGGGCAAG  
TGTACCTGAAACTCGATGCGTGTCTACATATTCTATCAAAATTGTATGTACAGAGCCTTC  
AGAAATATTACTCTGTTCAACAAGCTCGAAACGACCGTTTTCGAGCACTTTTGCCCGCAT  
TTCTTCCACGTGACAAATGTCAGTTGCCGTTGAGGGTCGATTCCCATGCTCCTCATCTTT  
GACAACTCCTGACCAGTTTTGAATCGTTTAACTCATTCAAAACAGTGGGAACATCCCAT  
ACAATGATCATGGTAACTTTACTTAGCGTATACCAAAGTTTTGGTACAAGGTATACCG

AGTTTAAAACAAAATTCAATGTTGAATCTTTGTTCTATCAGTGATCGCATGATGAAAATC  
GCAAAACGCACCTGACTTACTCGTATTCAAGATGACACAGAATAAACACTGATCAAATA  
AACAAAATCTGTGAACGTAGCGTTCTTAAGTATATTTCCAGCTATCAGAAGAGCTCAAGA  
AAACGTAATTTGGACGCATTGTGGGGTAGTTATGACCAAAATCCGGTTTCTAATCTAACA  
GACCTCGTA

--

>Btmar1.7.64\_gi-1092454650-gb-MAMS01000255\_1-:110727-111687  
gi-1092454650-gb-MAMS01000255.1-:110727-111687 Bemisia tabaci isolate MEAM1 Scaffold98, whole  
genome shotgun sequence 961 bp

TACGAGGTCTGTTAGATTAGAAACCGCATTTTGGTCATAACTAGCCCACAATGCGTCCAA  
ATTACGTTTTCTTGAGCTTTTCTGATAGCTGAAAATATGTTTAAGAACGTTACGTTACACA  
AATTTGAAAAATCCTAATTAGCTTCGTTGGTATGTGGCTTGAAGTAAGGCAACCTCAAGG  
GTGTTTTGCGATTTTTATGTTTGCCCGAACTTGTCTCCCTTTTTTCGGTCTTGCACTACA  
TTTTTCAACCCACAAGGACGATTGGAGTTTCGTCCCATATCGTAGCCGTACACTACAGT  
ATTTTCACCGAAAATTATCCTATCCAAAAATGTAGGATCATCGTTAGAACGTTCAAGCAG  
CTAAAGGGAAAAATGACATTTGGTTGGATTTTCGTTCAACGGACAACAATCAAGGGGCAAG  
TGTACCTGAAACTCGATGCGTGTCTACATATTCTATCAAAATTGTATGTACAGAGTTTTTC  
AAAAATATTACTCTGTTCAACAAGCTCGAAACGACCATTTTCGAGCTTTTTGCCCGCAC  
TTCTTCCACGTGACAAATGTCAGTTGCCGTTGAGGGTCGATTCCCATGCTCCTCATCTTT  
GACGAACTCCTGACCAGTTTTGAATCGTTTAACCCATTCAAACAGTGGGAACATCTCAT  
GCAATGATCATGGTAACTTTACTTAGCATATACCAAAAGTTTCGGTACAAGGTGTACCG  
AGTTTAAAACAAAATTTAATGTTGAATATTTGCTCTGTCAGTGATCGCATGATGAAAATC  
GCAAAACGGACCTGACTTACTCGTATTCAAGATGACACAGATTAAACACTGATCAAATA  
AACAAAATCTGTGAACGTAGCGTTCTTAAGTATATTTCCAGCTATCAGAAAAGCTCAAGG  
AAACCTAATTCGAACGCATTGTGGGCTAGTTATGACCAAAATCCGGTTTCTAATCTAACA  
G

>Btmar1.7.65\_gi-1092454837-gb-MAMS01000204\_1-:45163-46130  
gi-1092454837-gb-MAMS01000204.1-:45163-46130 Bemisia tabaci isolate MEAM1 Scaffold64, whole  
genome shotgun sequence 968 bp

TACGAGGTCTGTTAGATTAGAAACCGGATTTTGGTCATAACTAGCCCACAATGCGTTCAA  
ATTACGTTTTCTTGAGCTTTTCTGATAGCTGAAAATATATGTAAGAACGCTACGTTCA  
AATTTGAAAAATCCTAATTAGCTTCGTTGGTATGTGGCTTGAAGTAAGGCAACCTCAAGG  
GTGTTTTGCGATTTTTATGTTTGACCGTACTTGTCTCTCTTTTCCGGTCTTGACAACA  
TTTTTCAACCCACAAGGACGATTGGAGTTTCGTCTCCATATCATAGCCGTACACTAAAGT  
ATTGTCACCGAAAATTATCCTATCCAAAAATGTAGGATCATTGTTAGAACGTTCAAGCAG  
CTAAAGGTAATTTGACATTTGGTTGGATTTTCGTTCAACGGACAACAATCAAGGGGCAAG  
TGTACCTGAAACTCGATGCGTGTCTACATATTCTATCAAAATTGTATGTACAGAGCCTTC  
AAAAATATTACTCTGTTCAACAAGCTCGAAACGACCATTTCCGAGCACTTTTGCCCGCAT  
TTCTTCCACGTGACAAATGTCAGTCGCCGTTGAGGATCGATTCCCATGCTCCTCATTTTT  
GACAAACTCTGACCAGTTTTGAATCGTTTAAACCATTCAAAACAGTGGGGACATCTCGT  
ACAATGATCATGGTAACTTTTCTTAGCATATACCAAAGTTTCGGTACAAGGTATACCG  
AGTTTAAAACAAAATTTTATGTTGAATCTTTGCTCTGTCAAGTATCGCATGCTAAAATCG  
CAAAACGCACCTAACTTACTCGTATTCAAGATGACACAGAATAAACTGATCAAAATAA  
ACAAAATCTGTGAACGTAGCGTTCTTAAGTATATTTTAGCTATCAGAAAAGCTCAAGAA  
AACCTAATTCGAACGCATTGTGGGCTAGTTATGACCAAAATCCGGTTTCTAATCTAACAG  
ACCTCGTA

>Btmar1.7.66\_gi-1092454837-gb-MAMS01000204\_1-:138503-139481  
gi-1092454837-gb-MAMS01000204.1-:138503-139481 Bemisia tabaci isolate MEAM1 Scaffold64, whole  
genome shotgun sequence 979 bp

TACGAGGTCTGTTAGATCAGAAACCGGATTTTGGTCATAACTAGCCCACAATGCATCCAA  
ATTACGTTTTCTTGAGCTTTTCTGATAGCTGGAAATATACTTAAGAACGCTACGTTCA  
AATTTGAAAAATCCTAATTAGCCTTAATTAGCTTCGTTGGTATGTGGCTTGAAGTAAGGC  
AACCTCAAGGGTGTTTTGCGATTTTTATGTTTCACCGAACTTGTCTCTTTTTTTCGGTC  
TTGCACTACATTTTTCAACCCACAAGGACGATTGGAGTTTCGTCTCCATATCGTAGCCGT  
ACACTAAAATATTGTCACCGAAAATTATCCTATCCAAAAATGTAGGATCACTGTTAGAAC  
GTTCAAGCAGCTAAAGGGAAATTGACATTTGGTTGGATTTTCATTCAACGGACAACAATC

AAGGGGCAAGTGTACCTGAAACTCGATGCGTGTCTACATATTCTATCAAAATTGTATGTA  
CAGAGCCTTCAGAAATATTACTCTGTTCAACAAGCTCGAAACGACCGTTTTCGAGCACTT  
TTGCCCCGATTTCTTCCACGTGACAAATGTCAGTTGCCGTTGAGGGTCGATTCCCATGCT  
CCTCATCTTTGACGAACTCCTAACCAGTTTTGAATCGTTTAACTCATTCAAAACAGTGGG  
AACATCTCATACAATGATCATGGTAAACTTTACTTAGCGTATACCAAAAGTTTTGGTACA  
AGGTATACCGAGTTTAAACAAAAATTTAATGTTGATCTTTGCTCTATCAGTGATCGCATG  
ATGAAAATCGCAAAACGCACCTGACTTACTCGTATTCAAGATGACACAGAATAAACACTG  
ATCAAAATAAACAAATCTGTGAACGTAGCGTTCTTAAGTATATTTTCAGCTATCAGGAA  
AGCTCAAGAAAACCTAATTTGGACGCACTGTGGGCTAGTTATGACCAAAATCCGGTTTCT  
AATCTAATAGACCTCGTAT

>Btmar1.7.67\_gi-1092454837-gb-MAMS01000204\_1:-91845-92814  
gi-1092454837-gb-MAMS01000204.1:-91845-92814 Bemisia tabaci isolate MEAM1 Scaffold64, whole  
genome shotgun sequence 970 bp

TACGAGGTCTGTTAGATTAGAAACCGGATTTTGGTGGTAACTAGCCTCCAATCCGTTCTGA  
ATTAGGTTTTTTTGAAGTTTCCTGATAGCTGAAAAATTATTTAAGAACGCTACGCTCACA  
AATTTGAAAAATCCTAGTTAGCTTCGTTGGTATGTGGCTTGAAGTAAGGCAACCTCATGG  
GTGTTTTGCGATTTTTATGTTTGACCGAACTTGTCTCTCTGTTTTCGGTCTTGCAATACA  
TTTTTCAACCCACACGGATGATTGGAGTTTTGTCTCCATATCGTATAGCCGTACACTCAA  
GTATTGTCACCGAAAGTTTCCTATCCAAAACCTGTAGCATCATTGTTAGAACGTTCAAGCA  
GCTAAAGGGAAATTGACATTCGGTTGGATTTTTGTTCAACGGACAACAATTCAAGGGCAA  
GTTTAGTTGGAGCTCGATGCATGTCTATATATTCTATCAAAATTGTATGTACAGAGCCTT  
TAAAAATATTACACTGTTTCAGCAAGCTCAGTACGATCATTTCCGAGCACTTTGCCCCGAC  
TTTTTCCACGTGACAAATGTCAGTTGCCGTTAATGGTCGATTCCCGTGCTTCTCATCTTC  
GACGGACTCCTGACCTGTTTTGAATCGTTTAAACCACTCAAAACAGTGAGAACAACATCAT  
GTAATGATCTTGGTAACTTAGCATAGCATACCAAAAGTTTCGGTAAAAGGTATACCGAG  
TTTGAAACAAAATTTAATGTTAACTCTTTGCTCTATCAGTGACCGCATGATGAAAATCGC  
AGAACGCACCTGACTTATTATTACTCGTATACAAGATGACACAGAATAAACACTGATCAA  
GATAAACAAAATCTGTGAATCTAGCGTTCTTTAGTATATTATCAGCTATCAGGAAAGTCC  
AAGAAAACCTAATTCGGACACACACTGGGCTAGTTATCACCAAAATCCGGTTTATAATCT  
AACAGACCTC

>Btmar1.7.68\_gi-1092451018-gb-MAMS01001867\_1-:169879-170847  
gi-1092451018-gb-MAMS01001867.1-:169879-170847 Bemisia tabaci isolate MEAM1 Scaffold15941,  
whole genome shotgun sequence 969 bp

TACGAGGTCTGTTAGATTAGAAACCGGATTTTGGTCATAACTAGCCCACAATGTGTCCAA  
ATTACGTTTTCTTGAGCTTCTCTGATAGCTGAAAATATATTTAAGAACGCCACGTTTACA  
AATTTGAAAAATCCTAATTAGCTTCGTTGGTATGTGGCTTGAAGTAAGGCAACCTCAAGG  
GTGTTTTGCGATTTTATGTTTGACCGAATTTGTCTCTCTTTTTTCGGTCTTGCAATAC  
ATTTTCAACCCACAAGGACGATTGGAGTTTCGTCACCATATCTTAGCCGTACACTAAAG  
TATTGTCACCGATAATTATCCTATCCAAAAATTTAGGATCATTGTTAGAACATTCAAGCA  
GCTAAAGGGAAATTGACATTTGGTTGGATTTTCGTTCAACGGACAACAATCAAGGGGCAA  
GTGTACCTGAAACTCGATGCGTGTCTACATATTCTATCAAAATTGTATGTACAGAGCCTT  
CAGAAATATTAATCTGTTCAACAAGCTCAAAACGACCATTTTCGAGCACTTTTACCTGCA  
CTTCTTCCACGTGACAAATGTCAGTTGCCGTTGAGGCTCGATTTCCATGCTCCTTATCTT  
TAACGAACTCCTGACCAGTTTTGAATCGTTTAACCCATTCAAAACAGTGGAACATCTCA  
TACAATGATCATGGTAAACTTTACTTAGCATATACTAAAAGATTCGGTACAGGTATACCG  
AGTTTAAAATAAAATTTAATGTTGAATCTTTGCTCTATCAGTGATCGTCTGATGAAAATC  
GCAAAACGCATTTGACTTACTCGTATTCAAGATGACACAGAATAAACACTGATCAAAATA  
AACAAAATCTATGAACGTAGCGTTCTTAAGTATATTTTCAGCTATCAGAAAAGCTCAAGA  
AAACCTAATTCGGACGCATTGTGGGCTAGTTATGACCAAAATCCGGTTTCGAATCTAACA  
GACCTCGTA

>Btmar1.7.69\_gi-1092451018-gb-MAMS01001867\_1-:81594-82560  
gi-1092451018-gb-MAMS01001867.1-:81594-82560 Bemisia tabaci isolate MEAM1 Scaffold15941, whole  
genome shotgun sequence 967 bp

TACGAGGTCTGTTAGATTAGAAACCGGATTTTGGTCATAACTAGCTTACTGTGCGTTCGA  
ATTAGGTTTTCTTAACTTTTCTGATAGCCGACAACATACTAAAGAACGCTACGTTTACA  
GATTTGAAAAATCTTAATTAGCCTCGTTGGTATGTGGCTTCAAGTACGGCAACCTCATGG  
GTGTTTTGCGATTTTATATTTGACCGAATTTGTCTCTCTTTTTTCGGTCTTGCACTAAA  
TTTTTCAATCCACAAGGATGATTGGAGTTTCGTCTCCGTATCTTAGCCGTACACTCAAGT  
ATTATCACCGAAAATTATCCTATCTAAAAATGTAGGATCATTGTTAGAACGTTCAAGCAG  
CTACAGGTAAATTAACATTTGGTTGGATTTTGTTCACCGACAACAATCAAGGGGCAAGT

GTACTCTGAAACTCTATGCATGTCTACATATTCTACCAAAATTGTATGTACAGAGCCTTC  
AGAAATATTACACTGTTTCAGCAAGCTCGAAACAACCATTTTCGAGACTTTTGCCCGCACT  
TCTTCCACGTGACAAATGTTAGTTGCCGTTGATGGTCGATTCCCATGCTCCTCAACTTCA  
ACGAACTCCTGACCAGTTTTGAATCGTTTAACCCACTCAAATAGTGAGAAAACTCATA  
TAATGATCTTGGTAAACATTACTTAGCATACCAAAAGTTTCGGTACAAGGTATACCGAGC  
TTGAAACAAAATGTAATGTAAATCTTTGCTCTGTCTGTGATCGTATGATGAAAATCGCA  
AAACGCACCTGACTTCCTCGTATTCAAGATGACACAGAATAAACTAATCAAAATAAAC  
AAAATCTGTGAACGTAGCGTTCTTTAGTATGTTGTCGGCTATCAGAAAAGTTTAAGAAAA  
CCTAATTCGAACGCACAGTAAGCTAGTTATGACCAAAATCCGGTTTCTAATCTAACAGAC  
CTCGTAT

>Btmar1.7.70\_gi-1092451018-gb-MAMS01001867\_1-:141103-141954  
gi-1092451018-gb-MAMS01001867.1-:141103-141954 Bemisia tabaci isolate MEAM1 Scaffold15941,  
whole genome shotgun sequence 852 bp

TACAAGGTCTCTTAGATTAGAAACCGGATTTTGGTGATAACTAGCCAACAACGTCCGAAT  
TAGGCTTCTTGGACTTTTCTAATAGCTGGAAATATATTTAAAAACGCTACTTTCACAAAT  
TTGAAAAATCCTAATTAGCTTCGTTGGTATGTGACTTGAAGGAAGGCAACCTCATGGGTG  
TTCTTCTATTTTTATGTTTGACTGAACTTTTCTCTCTTTTTTCGGTCTTGCTGTACCTTT  
TTCAACCCACAAGGATGTTTGGAGTATAGTCTCCATATCGTAGCCATACACTCAAGTTTT  
GTCACCAAAAATTATCCTATCCAAAATGTAGGATCATTTTTAGAACGTGAAAGCAGCTG  
AAGGGAAATTGACATTCGGTTAGATTTTTGTTCAACGGACAACAATCAAGGGGCAAGTGT  
ACCTGAATCTCGATGCTTGTCCACACATTCTATCAAAATTGTATGTACAGAGCCTTCAGA  
AATATTACACTGTTTCAGCAAGCTTGAAACGATAATTTTTGAGCACTTTTGCCTACACTTC  
TTCGACGTGGCAAATATCAGTTGCCGTTGATGGTCGATTCCCGTGCTCCTCATCTTCGAC  
GGATTTCTTACCAGTTTTGTATCGTTTAACCCACTCAAAAAAATGAGAACAACCTCATACA  
ATGATCTTGATAAACTTTACTTAGCATACCAAAAGTTTCGATACAAGGTATATATCGAGT  
TTAAACAAAATTTATTGTAAATCTTTGCTCCATCAGTGATCGCATGATGAAAATCGCA  
GAACGTACCTGACTTACTCACATTCAAGGTGACACAGAATGGACTGATCAAAATAAAC  
AAAATCTGTGAA

>Btmar1.7.71\_gi-1092454842-gb-MAMS01000203\_1-:85922-86890

gi-1092454842-gb-MAMS01000203.1-:85922-86890 Bemisia tabaci isolate MEAM1 Scaffold637, whole genome shotgun sequence 969 bp

TACGAGGTCTGTTAGATTAAAAACCGAATTTTGGTCATAACTAGCCCACAATGCGTCCAA  
CTTACGTTTTCTTGAGCTTTTCTGATAGCTGAACATATATTTAAGAATGCTGCGTTCATA  
AATTTAAAAAATCCTAATTAGCTTCGTTGGTATGTGGCTTGAAGTAAGGCAACCTCAAGG  
GTGTTTTGCGATTTTATGTGTGACCGAACTTGTCTCTCTTTTTTCGGTCTTGCACTACA  
TTTTTCAACCCACAAAGACAATTGGAGTTTCGTCTCCATATCGTCGCCGTACACTAAAGT  
ATTGTCACCGAAGATTATCCTATCCAAAAATGTAGGATCATTGTTAGAACGTTCAAGCAG  
CTAAAGGGAAATCGACATTTGGTTGGATTTTCGTTCAACGGACAACAATCAAGGGGCAAG  
TGTACCTGAAACTTGATGTGTGTCTACATATTCTATCAAAATTGTATGTACAGAGCCTTC  
AGAAATATTACTCTGTTCAACAAGCTCGAAACGACCATTTTCGAGCACTTTTGCCCGCAC  
TTTTTCCACGTGACAAATGTCAGTTGCCGTTGAGGGTCAATTCCCATGCTCCTCATCTTT  
GACGAACTTCTGACCAGTTTTGAATCGTTTAAACCATTCAAAACAGTGGGAACATCTCAT  
ACAATGATCATGGTAACTTTACTTAGCATATACCAAAGTTTCGGTACAAGGTGTACCG  
AGTTTAAAACAAAATTTAATGTTTAACTTTGCTCTATCAGTGATCGCATGATGAAAATC  
GCAAAACGCACCTGACTTACTCGTATTCAATATGACACAGAATAAACTGATCAAAATA  
AACAAAATCTGTGAACGTAGCGCTCTTGAATATATTTTCAGCTATCAGGAAAGCTCAAGA  
AAACCTAATTCGGACGCATTGTAGGCTAGTTATGACCAAAATCCGTTTCTAATCTAACA  
GACCTCGTA

>Btmar1.7.72\_gi-1092454842-gb-MAMS01000203\_1-:2668149-2669116

gi-1092454842-gb-MAMS01000203.1-:2668149-2669116 Bemisia tabaci isolate MEAM1 Scaffold637, whole genome shotgun sequence 968 bp

TACGAGGTCTGTTAGATTAGAAACCGGATTTTCGGTCATAACTAGCCCACATTGCGTCCAA  
ATTACGTTTTCTTGAGCTTTTCTGATAGCTGAAAATATATTTAAGAACGCTACGTTTACA  
AATTTGAAAAATCCTAATTAGCTTCGTTGGTATGTGGCTTGAAGTAAGGCAATCTCAAGG  
GTGTTTTGCGATTTTATGTTTGACTGAACTTGTCTCTCTTTTTTCGGCCTTGCACTACA  
TTTGTCACCCACAAGGGCGATTGAGTTTCGTCTCCATATCGTAGCCGTACACTAAAGCA  
TTGTCACCGAAAATTATCCTATCCAAAAATGTAGGATCATTGCTAGAACGTTCAAGCAGC  
TAAAGGGAAATTGACATTTGGTTGGATTTTCGTTCAACGGACAACAATCAAGGGGCAAGT

GTACATGAACTCGATGCGTGTCTACATATTCTAACAAAATTGTATGTACAGAGTCTGCA  
GAAATATTACTCTATTCAACAAGCTCGAAACGATCATTTTCGAGCACTTTGCCCCGCACTT  
CTCCACGTGACAAATGTCAGTTGCCGTTGAGGGTCGATTCCCATGCTCTTCATCTTTGA  
CGAACTCCTGACCAGTTTTGAATCGTTTAACCCATTCAAAAGAGTGGGAACATCTCATAC  
AATGATCATGGTAACTTTACTTAGCATATACCAAATTTTCGGTACAAGGTATACCGAG  
TTTAAACAAAATTCAATGTTGAATCTTTGCTCTATCAGTGATCGCATGATGAAAATCGC  
AAACGACCTGACTTACTCGTATTCAAGATGACACAGAATAAACACTGATCAAAATAAA  
CAAAATCTGTGAACGTAGCGTTCTTGAATATATTTCCAGCTATCAGGAAAACCTCAAGAAA  
ACCTAATTCGGACGCATTGTGGGCTAGTTATGACCAAATCCGTTTCTAATCTAACAGA  
CCTCGTAT

--

>Btmar1.7.73\_gi-1092440684-gb-MAMS01006635\_1-:4141-5110  
gi-1092440684-gb-MAMS01006635.1-:4141-5110 Bemisia tabaci isolate MEAM1 Scaffold35379, whole  
genome shotgun sequence 970 bp

TACGAGGTCTGTTAGATTAGAAACCGGATTTTCGGTCATAACTAGCCACATTGCGTCCAA  
ATTACGTTTTCTTGAGCTTTTCTGATAGCTGAAAATATATTTAAGAACGCTACGTTTACA  
AATTTGAAAAATCCTAATTAGCTTCGTTGGTATGTGGCTTGAAGTAAGGCAATCTCAAGG  
GTGTTTTGCGATTTTTATGTTTGACTGAACTTGTCTCTTTTTTTCGGTCTTGCACTACA  
TTTTTCAACCCACAAGGGCGATTGAGTTTCGTCTCCATATCGTAGCCGTACACTAAAGTA  
TTGTCACCGAAAATTATCCTATCCAAAAATGTAGGATCATTGTTAGAACGTTCAAGCAGC  
TAAAGGGGAAATTGACATTTGGTTGGATTTTCGTTCAACGGACAACAATCAAGGGGCAAGT  
GTACATGAACTCGATGCGTGTCTACATATTCTAACAAAATTGTATGTACAGAGTCTGCA  
GAAATATTACTCTATTCAACAAGCTCGAAATGACCATTTTCGAGCACTTTGCCCCGCACTT  
CTCCACGTGACAAATGTCAGTTGCCGTTGAGGGTCGATTCCCATGCTCTTCATCTTTGA  
CGAACTCCTGACCAGTTTTGAATCGTTTAACCCATTCAAAAGAGTGGGAACATCTCATAC  
AATGATCATGGTAACTTTACTTAGCATATACCAAATTTTCGGTACAAGGTATACCGCG  
AGTTTAAACAAAATTCAATGTTGAATCTTTGCTCTATCAGTGATCGCATGATGAAAATC  
GCAAAACGACCTGACTTACTCGTATTCAAGATGACACAGAATAAACACTGATCAAAATA  
AACAAAATCTGTGAACGTAGCGTTCTTGAATATATTTCCAGCTATCAGGAAAACCTCAAGA  
AAACCTAATTCGGACGCATTGTGGGCTAGTTATGACCAAATCCGTTTTTTAATCTAACA



GACCTCGTAT

>Btmar1.7.74\_gi-1092426883-gb-MAMS01018655\_1-:262814-263781

gi-1092426883-gb-MAMS01018655.1-:262814-263781 Bemisia tabaci isolate MEAM1 Scaffold8852,  
whole genome shotgun sequence 968 bp

TACGAGGTCTGTTAGATTAGAAACCGGATTTTGGTCATAACTAGCCCACAATGCGTCCAA  
ATTACGTTTTCTTGAGCTTTTCTGATAGCTGGAAATATACTTAAGAACGCTACGTTCA  
AGTTTGAAAAATCCTAATTAGCTTCATTGGTATGTGGCTTGAAGTAAGGCAACCTCAAGG  
GTGTTTTGCGATTTTATGTTTCACCGAACTTGTCTCTTTTTTCGGTCTTGCAACACATT  
TTTCAACCCACAAGGACGATTGGAGTTTCGTCTCCATATCGTAGCCGTACACTAAAGTAT  
TGTCACCGAAAATTATCCTATCCAAAAATGTAGGATCACTGCTAGAACGTTCAAGCAGCT  
AAAGGAAAAATTGACATTTGGTTGGATATTCGTTCAACGGACAACAATAAAGGGGCAAGCG  
TACCTGAAACTCGATGCGTGTCTACATATTCTATCAAAATTGTATGTACAGAGCCTTCAG  
AAATATTACTCTGTTCAACAAGCTCGAAACGACCGTTTTCGGGCACTTTTGCCCGCATTT  
CTCCACGTGACAAATGTCAGTTGCCGTTGAGGGTCGCTTCCATGCTCCTCATCTTTGA  
CGAACTCCTGACCAGTTTTGAATCGTTTAAACCATTCAAAACAGTGGAACATCTCATAC  
AATGATCATGGTACACTTTACTCAGCAGATACCAAAAGTTTTGGTACAAGGTATACCGAG  
TTTAAAACAAAATTTAATGTTGAATCTTTGCTCTATCAGTGATCCTATGATGAAAATCGC  
AAAACGCACCTGACTTACTCGGATTCAAGATGACACAGAATAAACACTGATCAAAATAAA  
GAAAATCTGTGAACGTAGCGTTCTTAAGTATATTTCCAGCTATCAGGAAAGCTCAAGAAA  
ACCTAATTTGGACGCATTGTGGGTTAGTTATGACCAAAATCCGGTTTCTAATCTAACAGA  
CCTCGTAT

--

>Btmar1.7.75\_gi-1092446811-gb-MAMS01003786\_1-:201943-202903

gi-1092446811-gb-MAMS01003786.1-:201943-202903 Bemisia tabaci isolate MEAM1 Scaffold2348,  
whole genome shotgun sequence 961 bp

TACGAGGTCTGTTAGATTAGAAACCGGATTTTGGTCGTAACCTAACCCACAATGCGTCCAA  
ATTACGTTTTCTTGAGATTTTCTGATAGCTGGAAATATGTTTAAGAACGCTACTTTCACA  
AATTTGAAAAATCCTAATTAGCTTCGTTGGTATGTGGCTTGAAGTAAGGCAACCTCAAGG  
GTGTTTTGCGATTTTATGTTTGACCGAACTTGTCTCCCTTTTTTCGGTCTTGCACTACA  
TTTTTCAACCCACAAGGACGATTGGAGTTTCGTCCCATATCGTAGCCGTAGAGTACAGT

ATTTTCACCGAAAAGTATCTTATCCAAAAATGTAGGATCATTGTTAGAACGTTCAAGCAG  
CTAAAGGGAAAAATGACATTTGGTTGGATTTTCGTTCAACGGACAAGAATCAAGGGGCAAG  
TGTACCTGAAACTCGATGCGTGTCTCCATATTCTATCAAACTGTATGTAAAGAGCCTTC  
AGAAATATTACTCTGTTCAACAAGCTCGAAACGACCATTTTCGAGCTCTTTGCCCCGAC  
TTCTTCCACGTGACAAATGACAGTTGCCGTTGAGGGTCGATTCCCATGCTCCTCATCTTT  
GACGAACTCCTGACCAGTTTTGAATAGTTTAACCCATTCAAAACAGTGGGAACATCTCAT  
GCAATGATCATGGTAAACTTTACTTAGCATATACCAAAGTTTCGGTACAAGGTGTACCG  
AGTTTAAAACAAAATTTAATGTTGAATATTTGCTCTATCAGTGAACGCATGATGAAAATC  
GCAAAACGCACCTGACTTACTCGTATTCAAGATGACACAGAATAAACACTGATCAAAATA  
AACAAAATCTGTGAACGTAGCGTTCTTAAGTATATTTCCACCTATCAGAAAAGCTCAAGA  
AAACCTAATTCGAACGCATTGTGGGCTAGTTATGACCAAATCCGGTTTCTAATCTAACA  
G

--

>Btmar1.7.76\_gi-1092454888-gb-MAMS01000191\_1-884825-885793  
gi-1092454888-gb-MAMS01000191.1-884825-885793 Bemisia tabaci isolate MEAM1 Scaffold607, whole  
genome shotgun sequence 969 bp

TACGAGGTCTGTTAGATTAGAAACCGGATTTTGGTCATAACTAGCCTGAAATGCGTCCAA  
ATTACGTTTTCTTGAGCTTTTCTGATAGCTGAAAATATATTTAAGAACGCTACGTTCA  
AATTTGAAAAATCCTAATTAGCTTCGTTGGTATGTGGCTTGAAGTAAGGCAACCTCAAGG  
GTGTTTTGCGATTTTTATGTTTGACCGAACTTGTCTCTTTTCTCGGTCTTGACAACA  
TTTTTCAACCCACAAGGACGATTGGAGTTTCGTCTCCATACCGTAGCCGTACACTAAAGT  
ATTGTCACCGAAAATTATCCTATCCAAAAATGTAGGATCATTGTTAGAACGTTCAAGCAG  
CTAAAGGTAATTTGACGTTTGATTGGATTTTCGTTTAACGGACAACAATCAAGGGGCAAG  
TGTACCTGAAACTCGATGCGTGTCTACATATTCTATCAAAATTGTATGTACAGAGCCTTC  
AGAAATATTACTCTGTTCAACAAGCTCGAAACGACCATTTTCGAGCACTTTTCCCCGCAT  
TTCTTCCACGTGACAAATGTCAGTCGCCGTTGAGGGTCGATTCCCATGCTCCTCATTTTT  
GACGAACTCCTGACCAGTTTTGAATCGTTTAACCTATTCAAAACAGTGGGAACATCTCAT  
ACAATGATCATGGTACACTTTTCTTAGCATATACCAAAGTTTCGGTACAAGGTATACCG  
AGTTTAAAACAAAATTTAATGTTGAATCTTTGCTCTGTCTCAGTGATCGCATCATGGAAATC

GCAAAACTCACCTGACTTACTCGTGTTCAAGATGACACAGAATAAACTGATCAAAATA  
AACAAAATCTGTGAACGTAGCGTTCTTAGGTATATTTCCAGCTATCAGGAAAGCTCAAGA  
AAACCTAATTCGGACGCATTATGGGCTAGCTATGACCAAATCCGGTTTCTAATCTAACA  
GACCTCGTA

>Btmar1.7.77\_gi-1092454888-gb-MAMS01000191\_1-:297566-298533  
gi-1092454888-gb-MAMS01000191.1-:297566-298533 Bemisia tabaci isolate MEAM1 Scaffold607, whole  
genome shotgun sequence 968 bp

TACGAGGTCTGTTAGATTAGAAATGGGATTTTGGTCATAACTAGCCCACAATGCGTCCAA  
ATTACGTTTTCTTGAGCTTTTCTGATAGCTGAAAATATATTTAAGAACGCTACGTTCA  
AATTTGAAAAATCATAATTAGCTTTTTCGGTATGTGGCTTGAAGTAAGGCAACCTCAAGG  
GTGTTTAGCGATTTTTATGTTTGACCGAACTTGTCTCTTTTTTCGGTCTTGCACTACA  
TTTTTCAACCCACAAGGACGATTGGAGTTCGTCTCCATATCGTAGCCGTACACTAAAGT  
ATTGTCACCGAAAATTATCCTACATAAAAATGTAGGATCATTGTTAGAACGTTCAATCAG  
CTAAAGGGAAATTGACATTTGGTTGGATTTTCGTTCAACGTACAACAATCAAGGGGCAAG  
TGTACCTGAAACTCGATGCGTGTTTACATATTCTATCAAAATTGTATGTACAGAGCCTTC  
AGAAATATTGCTCTGTTCAACAAGCTCGAAACGACCATTTTCGAGCACTTTTGCCCGCAC  
TTCTTCCACGTGACAAATGTCAGTTGCCGTTGAGGGTCGATTCCCATACTCCTCATCTTC  
GACGAACTCCTGACCAGTTTTGAATCGTTTAACCACTCAAACAGTGGAACATCTCAT  
ACAATGATCTTGGTAACTTTACTTAGCATACAAAAGTTTCGGTACAAGGTATACCGAG  
TTTAAACAAAATTAATGTTGAGTCTTGCTCTATCAGTGATCGCATGCTGAAAATCGC  
AAACGCACCTGACTTACTCGTATTCAAGATGACACAGAATAAACTGATAAAAATAAA  
CAAATCTGTGATCGTAGCGTTCTTAAGTATATTTTCAGCTATCAGGAAAGCCCAAGAAA  
ACCTAATTCGGACGCATTGTGGGCTAGTTATGACCAAATCCGGTTTCTAATCTAACAGA  
CCTCGTAT

>Btmar1.7.78\_gi-1092454888-gb-MAMS01000191\_1-:2308989-2309619  
gi-1092454888-gb-MAMS01000191.1-:2308989-2309619 Bemisia tabaci isolate MEAM1 Scaffold607,  
whole genome shotgun sequence 631 bp

TCATTGTTAGAACGTTCAAGCAGCTAAAGGTAATTTGACATTTGGTTGGATTTTCGTTCA  
ACGGACAACAATCAAGGGGCAAGTGACCTGAAACTCGATGCGTGTCTACATATTCTATC  
AAAATTGTATGTACAGAGCCTTCAGAAATATTACTCTGTTCAACAAGCTCGAAACGATCA

TTTTCGAGCACTTTTGCCCGCATTTCTTCCTCGTGATAAATGTCAGTCGCCGTTGAGGGT  
TGATTCCCATGCTCCTCATTTTTGACGAACTCCTGACCAGTTTTGAATCGTTTAACCCAT  
TCAAAACAGTGCGAACATCTCATACAATGATCATGGTAAACTTTTCTTAGCATATACCAA  
AAGTTTCGGTACAAGGTATACCGAGTTTAAACAAAATTTAATGTTGAATCTTGCTCTG  
TCAGTGATCGCATGCTAAAATCGCAAAACGCACCTGACTTACTCGTATTCAAGATGACAC  
AGAATAAACACAGATCAAAATAAACAAAATCTGTGAACCTAGCGTTCTTAAGTATATTTT  
AAGCTATCAGGAAAGCTCAAGAAAATCAATTCCGACGCATTATGGGCTAGTTATGACCA  
AAATCCGGTTTCTAATCTAACAGACCTCGTA

>Btmar1.7.79\_gi-1092434953-gb-MAMS01010585\_1-:460268-461235  
gi-1092434953-gb-MAMS01010585.1-:460268-461235 Bemisia tabaci isolate MEAM1 Scaffold5223,  
whole genome shotgun sequence 968 bp

TACGAGGTCTGTTAGATTAGAAACCGGATTTTGGTCATAACTAGCCTACAATGCGTCCAA  
ATTACGTTTTCTTGAGCTTTTCTGATAGCTGAAAATATATTTAAGAACGCTACGTTTACA  
AATTTGAAAAATCTAATTAGCTTCGTTGGTATGTGGCTTGAAGTAAGGCAACCTCAAGG  
GTGTTTTGTGATTTTTATGTTTGACCGAACTTGTCTCTCTTTTTTCGGTCTTGACAACA  
TTTTTTAACCCACAGGGACGATTGGAGTTTCGTCTCCATATCGTAGCCGTACACTAAAGT  
ATTGTCACCTAAAATTATCCTATCCAAAAATGTAGGATCATTGTTAGAACGTTCAAGCAG  
CTAAAGGTAATTTGACATTTGGTTGGATTTTCGTTCAAAGGACAACAATCAAGGGGCAAG  
TGTACCTGAAACTCGATGCGTGTCTACATATTCTATCAAAATTGTATGTACAGAGCCTTC  
AGAAATATGACTTTGTTCAACAAGCTCGAAACGACCATTTTCGAGCACTTTTGCCCGCAT  
TTCTTCCACGTGACAAATGTCAGTCGCCGTTGAGGGTCGATTCCCACGCTCCTCATCTTT  
AACGAACACCTGACCAGTTTTGAATCGTTTAACCCATTCAAACAGTGCGAACATCTCAT  
ACAATGATCATGGTAAACTTTTCTTAGCATATACCAAAGTTTCGGTACAAGGTATACCG  
AGTTTAAATAAAATTTAGTGTTGAATCTTGCTCTGTCAGTGATCGCATGCTAAAATCG  
CAAAACGCACCTGACTTACTCGTATTCAAGATGACACAGAATAAACACTGATCAAAATAA  
ACAAAATCTGTAAACGTAGCGTTCTTAAGTATATTTCCAGCTATCAGGAAAGCTCAAGAA  
AACCTAAATCGGACGCATTGTGGGCTGGTTATGACCAAAATCCGGTTTCTAATCTAACAG  
ACCTCGTA

>Btmar1.7.80\_gi-1092434953-gb-MAMS01010585\_1-:323118-324089  
gi-1092434953-gb-MAMS01010585.1-:323118-324089 Bemisia tabaci isolate MEAM1 Scaffold5223,  
whole genome shotgun sequence 972 bp

TACGAGGTCTGTTAGATTAGAAACCGGATTTTGGTCATAACTAGCCTACAATGCGTCCAA  
ATTACGTTTTCTTGAGCTTTTCTGATAGCTGAAAATATATTTAAGAACGCTACGTTACACA  
AATTTGAAGAATCCTAGTTAGCTTCGTTGGTATGTGGCTTGAAGTAGGTAAGGCAACCTC  
AAGGGTGTTTTGCGATTTTTATGTTTGACCGAACTTGTCTCTCTTTTTTCGGTCTTGAC  
AACATTTTTCAACCCACAAGGACGATTGGAGTTTCGTCTCCATATCGTAGCCGTACACTA  
AAGTATTGTCACCTAAAATTATCCTATCCAAAAATGTAGGATCATTGTTAGAACGTTCAA  
GCAGCTAAAGGTAATTTGACATTTGGTTGGATTTTCGTTCAAAGGACAACAATCAAGGGG  
CAAGTGACCTGAACTCGATGCGTGTCTACATATTCTATCAAAATTGTATGTACAGAGC  
CTTCAGAAATATGACTTTGTTCAACAAGCTCGAAACGACCATTTTCGAGCACTTTTGCCC  
GCATTTCTCCACGTGACAAATGTCAGTCGCCGTTGAGGGTCGATTCCCACGCTCCTCAT  
CTTTAACGAACTCCTGACCAGTTTTCAATCGTTTAACCCATTCAAAACAGTGGAACATC  
TCATACAATGATCATGGTAACTCTTCTTAGCATATACCAAAAGTTTCGGTACAAGGTAT  
ACCGAGTTTAAACAAAAATTTAGTGTTGAATCTTTGCTCTGTCAGTGATCGCATGCTAAA  
ATCGCAAAACGCACCTGACTTACTCGTATCCAAGATGACACAGAATAAACACTGATCAAA  
ATAAACAAAATCTGTGAACGTAGCGTTCTTAAGTATATTTCCAGCTATCAGGAAAGCTCA  
AGAAAACCTAAATCTGACGCATTCTGGGCTAGTTATGACCGAAATCCGGCTTCTAATCTA  
ACAGATCTCGTA

>Btmar1.7.81\_gi-1092455448-gb-MAMS01000042\_1-:72644-73621  
gi-1092455448-gb-MAMS01000042.1-:72644-73621 Bemisia tabaci isolate MEAM1 Scaffold192, whole  
genome shotgun sequence 978 bp

TACGAGGTCTGTTAGATTAGAAACCGGATTTTGGTCATAACTAGCCCACAATGCGTCCAA  
ATTACGTTTTCTTGAGCTTTTCTGATAGCTGGAAATATACTTAAGAACGCTACGTTACACA  
AGTTTGAAAAATCCTAATGAGCTTCGTTGGTATGTGGCTTGAAGTAAGGCAACCTCAAGG  
GTGTTTTGCGATTTTTATGTTTCACCGAACTTGTCTCTCTTTTTTCGGTCTTGCACTACA  
TTTTTCAACCCACAAGGACGATTGGAGTTTCATCTCCATATCGTAGCCGTACACTAAAGT  
ACTTATTGTCATCGAAAATTATCCTATCCAAAAATGCAGGATCATTGTTAGAATGTTCAA  
GCAGCTGAAGGGAAATTGACATTTGGTTGGATTTTCGTTCAACGGACAACAATCAAGGGG

CAAGTGTACCTGAAACTCGATGCATGTCTACTTATTCTATCAAAATATATTGTATGTACA  
GAGCCTTTAGAAATATTACTCTGTTCAACAAGCTCGAAACGACCATTTTCAAGCACTTTT  
GCCCCGCACTTCTTCCACGCGACAAATGTCAGTTGCCGTTGAAGGTCGATTCCCATGCTCC  
TCATCTTTGACGAACTCCTGACCAGTTTTGAATAGTTTAACGCATTCAAAACAGTGGGAA  
CATCTCTTACAATGATCATGGTAAACTTTACTTAGCATATACCAAAAGTTTCGGTACAAG  
GTATACCAAGTTTAAAACAAAATTTAATGTTTAATCTTTGCTCTATCAGTGATGGCATGA  
TGAAAATCGCAAAACGCACCTGACTTACTCGTATTCAAGATGACACAGAATAAACACTAA  
TCAAAATAAACAAAATCTGTGAACGTAGCGTTCTTAAGTATATTTCCAGCTATCAGGAAA  
GCTCAAGAAAACCCAATTCGGACGCATTGTGGGCTAGTTATGACCAAAATCCGGTTTCTA  
ATCTAACAGACCTCGTAT

--

>Btmar1.7.82\_gi-1092454581-gb-MAMS01000286\_1-:145985-146956  
gi-1092454581-gb-MAMS01000286.1-:145985-146956 Bemisia tabaci isolate MEAM1 Scaffold1011,  
whole genome shotgun sequence 972 bp

TACGAGGTCTGTTAGATTAGAAACCCGATTTTGGTCATAACTAGCCCACAATGCGTCCAA  
TTTACATTTTCTTGAGCTTTTCTGATAGCTGAAAATATATTTAAGAACGCTACGTTTACA  
AATTTGAAAAATCTTAATTAGCTTCGTTGGTATGTGGCTTAAAGTAAGGCAACCTCAAGG  
GTGTTTTGCGATTTTTATGTTTGACCGAACTTGTCTCTTTTTTTCGGTCTTGCACTACA  
TTTTTCAGCCCACAAGGGCGATTGGAGTTTCGTCTCCATATCGTAGCCGTATACTAAAGT  
ATTGTCACCGAAAATTATCCTATCCAAAAATGTAGGATCATTGTTGGAGCGTTCAAGCAG  
CTAAAGGGAAATTGGCATTGTTGGATTTCGTTCAACGGACAACAATCAAGGGGCAAG  
TGTACCTGGAACCTTGATGCGTGTTTACATACTCTATCAAAATTGTACGTACAGAGCTTTC  
AGAAATACTACTCTGTTCAACAAGCTCGAAACGACCATTTTCGAGCAATTTTGTCCGCAC  
TTATTCTTCCACGTGACAAATGTCGGTTGCCGTTGAGGGTCGATTCCCATGCTCCTCATC  
TTTAACGAACTCCTGACCAGTTTTGAATCGTTAAACCTTTCAAAACAGTGGAACGTCTC  
ATACAATGATCATGGTAAACTTTACTTAGCATATACCAAAAGTTTCTGTATAAGGTTTAC  
CGAGTTTAAAACAAAATTTAATGTGCAATCTTTGCTCTATCAGTGATCGCATGATGAAAA  
TCGCAAAACGCACCTGACTTACTCCTGTTCAAGATGACTTAGAATAAACACTGATCAAAA  
TAAACAAAATCTGTGAATGTAGCGTTCTTAAGTATATTTTCAGCTATCAGGAAAGCTCAA

GAAAATCTAATTCGGACGCATTGTGGGCTAGTTATGACCAAATCCGGTTTCTAATCTAA  
CAGCCCTCGTAT

--

>Btmar1.7.83\_gi-1092436272-gb-MAMS01009266\_1-:10586-11557  
gi-1092436272-gb-MAMS01009266.1-:10586-11557 Bemisia tabaci isolate MEAM1 Scaffold46539, whole  
genome shotgun sequence 972 bp

TACGAGGTCTGTTAGATTAGAAACCGGATTTTTGTCATAACTAGCCTACAATGCGTCCAA  
ATTACGTTTTCTTGAGCTTTTCTGATAGCTGAAAATATATTTAAGAACGCTACGTTCAACA  
AATTTGAAAAATCGTAATTAGCTTCGTTGGTATGTGGCTTGAAGTAAGGCAACCTCAAGG  
GTGTTTTGCGATTTTTATGTTTGACCGAACTTGTCTCTTTTTTCGGTCTTGACAACA  
TTTTTCAACCCACAAGGACGATTGGAGTTTCGTCTCCATATCGTAGCCGTACACTAAAGT  
ATTGTCACCGAAAATTATCCTATCCAAAAATGTAGGATCATTGTTAGAACGTTCAAGCAG  
CTAAAGGTAATTTGACATTTGGTTGGATTTTCGTTCAAAGGACAACAATCAAGGGGCAAG  
TGTACCTGAAACTCGATGCGTGTCTACATATTCTATCAAAATTGTATGTACAGAGCCTTC  
AGAAATATGACTTTGTTCAACAAGCTCGAAACGACCATTTTCGAGCACTTTTGCCTGCAT  
TTCTTCCACGTGACAAATGTCAGTCGCCGTTGAGGGTCGATTATTCCCACGCTCCTCATC  
TTTAACGAACTCCTGACCAGTTTTGAATCGTTTAACCCATTCAAAACAGTGGGAACATCT  
CATACAATGATCATGGTAACTTTTCTTAGCATATACCAAAGTTTCGGTACAAGGTAAA  
CCGAGTTGAAAACAAAATTTAGTGTTGAATCTTTGCTCTGTCAGTGATCGCATGCTAAAA  
TCGCAAAACGCACCTGACTTACTCGTATTCAAGATGACACAGAATAAACACTGATCAAAA  
TAAACAAAATCTGTGAACGTAGCGTTCTTAAGTATATTTCCAGCTATCAGGAAAGCTCAA  
GAGAACCTAAATCGGACGCATTGTGGGCTAGTTATGAACAAAATCCGGTTTCTAATCTAA  
CAGACCTCGTAT

--

>Btmar1.7.84\_gi-1092448477-gb-MAMS01003064\_1-:690840-691809  
gi-1092448477-gb-MAMS01003064.1-:690840-691809 Bemisia tabaci isolate MEAM1 Scaffold2068,  
whole genome shotgun sequence 970 bp

TACGAGGTCTGTTAGATTAGAAACCGGATTTTGGTCATAACTAGCCCACAATGCGTCCAA  
ATTACGTTTTCTTGATCTTTTTTGATAGCTGAAAATATATTTAAGAACGCTACGTTCAACA

AATTTGAAAAATCCTAATCAGCTTCATTGATATGTGGCTTGAAGTAAGGCAACCTCAAGG  
GTGTTTTGCGATATTTATGTTTGACCGAACTTGTCTCTCTGTTTTCGGTCTTGCACTACA  
TTTTTCAACCCACAAGGACGATTGGAGTTTCGTCTCTATATCGTAGCCGTACACTAAAGT  
ATTGTCACCGAAAATTATCCTATCCAAAAATGTAGGATCATTGTTAGAACGTTCAAGCAG  
CTAAAGGGAAATTGACATTTGGTTGGATTTTCGTTCAACAGACAACAATCAAGGGGCAAG  
TGTACCTAAAACTCGGCGCGTGTCTACATATTCTATCAAAATTGTATGTACAGAGCCTTC  
AGAAATATTACACTGTTCAACAAGCTTGAAATGACCATTTTCGAGCACTTTTGCCCGCAC  
CTCTCCACGTGACAAATGTCAGTTGCCGTTGAGGGTCGATTCCCATGCTCCTCATCTTT  
GACGAACTCCTGACCACTTTTGAATCGTTTAAACCATTCAAAACGGTGGAACATCTCAT  
ACAATGATAATGGTAACTTTACTTAGCATACACCAGAAATTTCCGTACAAGGTATACCG  
AGTTTAAAACAAAATTTAATGTTGAATCTTTGCTCTATCAGTGATCGCATGATGAAAATC  
GAAAAACGCACCTGACTTACTCGTATTCAAGATGACACAAAATAAACACTGATCAGAATA  
AACAAAATCTGTTAACGTAACGTTCTTAAGTATATTTCCAGCTATCAGGAAAGTTCAAGA  
AAACCTAATTCGGACGCGTTGTGGGCTAGTTAAGTCCAAAATTCGGTTTCTAATCTAACA  
GACCTCGTAT

--

>Btmar1.7.85\_gi-1092454801-gb-MAMS01000208\_1-:3607457-3608427  
gi-1092454801-gb-MAMS01000208.1-:3607457-3608427 Bemisia tabaci isolate MEAM1 Scaffold649,  
whole genome shotgun sequence 971 bp

TACGAGGTCTGTTAGATTAGAAACCGGATTTTGGTCATAACTAGCCCACAATGCGTCCAA  
ATTACGTTTTCTTGAGTTTTTGTGATAGCTGACAATATATTTAAGAACGCTACGTTCA  
AATTTGAAAAATCCTAATTAGCTTCGTTAGTATGTGGCTTGAAGTAAGGCAACCTCAAGG  
GTGTTTTGCGATTTTTATGTTTGACCGAACTTGTCTCTCTTTTTCCTGTCTTGCACTACA  
TTTTTCAACCCACAAGGACGATTGGAGTTTCGTCTCCATATCGTAGCCGTACACTAAAGT  
ATTGTCACCGAAAATTATCCTATCCAAAAATGTAGGATCATTGTTAGAACGTTCAAGCAG  
CCATAAAGGGAAATTGACATTTGGTTGGATTTTCGTTCAACGGACAACAATCAAGGGTCA  
AGTGTACCTGAACTCGATGCGTGTCTAAATATTCTATCAAAATTGTATGTAGAGAGCCT  
TCAGAAATATTACTCTGTTTAGCAAGCTCGAAACGACCATTTTCGAGCACTTTTACCCGC  
ACTTCTCCACGTGACAAATGTCAGTTGCTGTTGAGGGTCGATTCCCATGCTCCTCATCT



TTGACGAACTCCTTTCCAGTTTTGAATCGTCTAACCCATTCAAAACAGTGGGAACATCTC  
AAACAATGATCATGGTAAACTTTACTTAGCATATACCAAATTTTCGGTACAAAGTATAC  
CGAGCTTAAACAAAATTTAATGTTGAATCTTTGCTCTATCAGAGATCGCATGATGAAAA  
TCGCAAAACGCACCTGACTTACTCGTATTCAAGATGACACAGAATAAACACTGATCAAAA  
TGAACAAAATCTGTGAACGTAGCATTCTTAAATATATTTCCAGCTATCAGGAAAGCTCAA  
GAAAACCTAATTCGGACGCACTGTAGGCTACTTATGACCAAATCCGGTTTCTAATCTAA  
CAGACCTCGTA

--

>Btmar1.7.86\_gi-1092454879-gb-MAMS01000194\_1-:2033913-2034687  
gi-1092454879-gb-MAMS01000194.1-:2033913-2034687 Bemisia tabaci isolate MEAM1 Scaffold610,  
whole genome shotgun sequence 775 bp

TTATGTTTGACCGAACTTGTCTCCCTTTTCCGGTCTTGCACTACATTTTCAACCCACA  
AGGACGATTGGAGTTTCGTCTCCATATCGTAGGCGTACACTCAAGTATTGTCACCGAAAA  
TTATCCTATCCAAAAATGTAGGATCATTGTTAGAACGTTCAAGCAGCTAAAGGGAAATTG  
ACATTTGGTTGGATTTTCGTTCAACGGGCAACAATCAAGGGGCAAGTGACTTGAAACTC  
GATGCGTGTCTACATATTCTATCAAAATTGTATGTACAGAGCCTTCAGAAATATTACTCT  
GTTCAACAAGCTTGAAACGACCATTTTCGAGCACTTTTGCCCGCACCTCTTCCACGTGAC  
AATGTCAGTTGCCGTTGAGGGTCGATTCCCATGCTCCTCATCTTTGACGAACTCCTGACC  
AGTTTTGAATCGTTCAACCCATTCAAAACAGTGGGAACATCTCATACAATGATCATGGTA  
AACTTTACTTAGCATATACCAAAGTTTCGGTACAAGGTATACCGAGTTTAAACAAAAT  
TTAATGTTGAATCTTTGCTCTATCAGTGATCGCATGATGAAAATCGCAAAACGCACCTGA  
CTTACTCGTATTCATGATGACACAGAATAAACACTGATCAAAATAAACAAAATCTGTGAA  
CGTAGCGTTCTTAAAGATATTTCCAGCTATCAGAAAAGCTCAAGAAAACCTAATTCGGAC  
GCATTGTGGGCTAGTTATGACCAAATCCGGTTTCTAATCTAACAGACCTCGTAT

>Btmar1.7.87\_gi-1092454879-gb-MAMS01000194\_1-:2235308-2236283  
gi-1092454879-gb-MAMS01000194.1-:2235308-2236283 Bemisia tabaci isolate MEAM1 Scaffold610,  
whole genome shotgun sequence 976 bp

TACGAGGTCTGTTAGATTAGAAACCGGATTTTGGTGATAACTAGCCATAATGCGTCGAA  
ATTAGGTTTTTTTGAACCTTCCTGATAGCTGGAAATATACTTAAGGACGCTACGTTACA

AATTTGAAAAATTCTAATTAGCTTTGTTGGTATGTGGCTTGAAGTACGGCAACCTCATGG  
GTGTTCTGCAATTTTTATGTTTGACCGAACTTGTCTCTCTTTTTTCAGTCTTGCACTACA  
TTTGTCAACCCACAAGGACGGTTGGCGATTCTTTCCATATCGTAGGCGTACACTCAAGT  
ATTGTCACCGAAAATTATCCTATCAAAAAATGTAGGATCATTGTTAGAACGCTCAAGAAC  
CTCAAGTAGCTAAAGGAAAATCGACATTCAGTTGGATTTTTGTTCAACGGACAACAATTA  
AGGGGCAAGTGTACCTGAAACTCGATGCATGTCTACATATTCCATCAAAATTGTATGTAC  
AGAGCCTTCAGAAATATTAACTGTTGAGCAAGCTCGAAACGACATTTTCGAGCAATTT  
AGCCACACTTTTTCCATGTGACAAATGTCAGTTGCCGTTGATCGTCGATTCCCGTGCTC  
CTCATCTTCGACGAACTCCTGACCAGTTATGAATCGTTTAACCCACTCAAGGCAGTGAGA  
ACAACTCATACAATGATCTTGGTAACTTTACTTGTCTACACAAAAGTTTCGGTACAATG  
TATACCGAGTTTAAACAAAATTTAATGTTAAATCTCAGCTCTGTCAGTGATCGCATGAT  
GAAATTCGCAGAACGCACCTGACTTACTCGTATTCAAGATGACACAGAATAAACTGAT  
CAAAATAAACAAAATCTGAGAATCTAGCGTTCTTCAATATGTTATCAGCTATTAGGAAAG  
TCCAAGGAAACCCAATTTGGACGCACACTGGGCTAGATATCACCAAAATCCGGTTTCTAA  
TCTAACAGACCTCGTA

--

>Btmar1.7.88\_gi-1092447432-gb-MAMS01003516\_1-:1003273-1004241  
gi-1092447432-gb-MAMS01003516.1-:1003273-1004241 Bemisia tabaci isolate MEAM1 Scaffold2242,  
whole genome shotgun sequence 969 bp

TACGAGGTCTGTTAGATTAGAAACCGGATTTTGGTCATAACTAGCCTACAATGCATTCAA  
ATTACGTTTTCTTGAGCTTTTCTGATAGCTGAAAATATATTTAAGAACGCTACGTTCACA  
AATTTGAAAAATCTAATTAGCTTCGTTGGTATGTGGTTTGAAGTAAGGCAACCTCAAGG  
GTGTTTTGCGATTTTTATGTTTGACCGAACTTGTCTCTCTTTTTTCGGTCTTGACAACA  
TTTTTCAACCCACAAGGACGATTGGAGTTTCGTCTCCATATCGTAGCCGTAACTAAAGT  
ATTGTCACCAAAAATTATCCTATCCAAAAATGTAGGATCATTGTTAGAACGTTCAAGCAG  
CTAAAGGTAATTTGACATTTGGTTGGATTCTCGTTCAAGGGACAACAATCAAGGGGCAAG  
TGTACCTGAAACTCGATGCGTGTCTACATATTCTATCAAAATTGTATGTACAGAGCCTTC  
AGAAATATTACTCTGTTCAACAAGCCCGAAACGATCATTTTCGAGCACTTTTGCCCGCCT  
TTCTTCCTCATGACAAATGTCAGTCGCCGTTGAGGGTCGATTCCCATGCTCCTCATTTTT  
GACGAACTCCTGACCAGTTTTGAATCGTTTAACCCATTCAAAACAGTGGAACATCTCAT

ACAATGATCATGGTAACTTTTCTTAGCATATACCAAAGTTTCGGTACACGGTATACCG  
AGTTTAAACAAAATTTAATGTTGAATCTTTGCTCTGTCAGTGATCGCATGCTAAAATCG  
CAAAACGCACCTGACTTACTCGTATTCAAGATGACACAGAATAAACACAGATCAAAATAA  
ACAAAATCTGTGAACGTAGCGTTCTTAAGTATATTTTAAGCTACCAGGAAAGCTCAAGAA  
AACCCAATTCGGACGCATTATGGGCTAGTTATGACCAAATCCGGTTTCTAATCTAACAG  
ACCTTGTAT

--

>Btmar1.7.89\_gi-1092452381-gb-MAMS01001247\_1:-857-1830  
gi-1092452381-gb-MAMS01001247.1:-857-1830 Bemisia tabaci isolate MEAM1 Scaffold13540, whole  
genome shotgun sequence 974 bp

TACGAGGTCTGATAGATTAGAAACCGGATTTTGGTCATAACTAGCCCACAATGCGTCCAA  
ATTACGTTTTCTTGAGCTTTTCTGATAGCAGGAAATATACTTAAGAACGCTACGTTCA  
AGTTTGAAAAATCCTAATGAGCTTCGTTGGTATGTGGCTTGAAGTAAGGCAACCTCAAGG  
GTGTTTTGCGATTTTATGTTCCACCGAACTTGATCTCTTTTTTCGGTCTTGCACTACA  
TTTTTCAACCCACAAGGACGATTGGAGTTTTGTCTCCATATCGTAGCCGTACAATAAAAT  
ATTGTCACCGAAAATTATCCTATCCAAAAATGTAGGATCACTGTTAGAACGTTCAAGCAG  
CTAAAGGGAAATTGACATTTGGTTGGATTTTCGTTCAACGGACAACAATCAAGGGGCAAG  
TGTACCTGAAACTCGATGCGTGTCTATACATCTTCTATCAAAATTGTATGTACAGAGTTT  
TCAGAAATATTACTCTGTTCAACAAGCTCGAACGACCGTTTTTCGAGCACTTCTGCCCCGA  
TTTCTTCCACGCGACAAATGTCAGTTGCCGTTGAGGGTCGATTCCCATGCTCCTCATCTT  
TGACGAACTCCTGACCAGTTTTGAATCGTTTAACTCATTCAAACAGTGGAACATCTCA  
TACAATGATCATGGTAACTTTACTTAGCGTATACCAAAGTTTTGGTACAAGGTTTACC  
GAGTTTAAACAAAATTTAATGTTGAATCTTTGTTCTATCAGTGATCGCATGATGAAAAT  
CGCAAAACGCACCTGACTTACTCGTATTCAAGATGACACAGAATAAACTGATCAAAAT  
AAACAAAATCTGCGGTGAACGTAGCGTTCTTAAGTATATTTCTAGCTATCAGAAGAGCTC  
AAGAAAACGTAATTTGGACGCATTGTGAGGTAGTTATGACCAAATCCGGTTTCTAATCT  
AACAGACCTCGTAT

>Btmar1.8.1\_gi-1092425808-gb-MAMS01019730\_1-:3371829-3372676  
gi-1092425808-gb-MAMS01019730.1-:3371829-3372676 Bemisia tabaci isolate MEAM1 Scaffold995,  
whole genome shotgun sequence 848 bp

GAAACCAGATTTTGGTGATACTAGCCCACAATGCACCCGAATTAGGTTTCCTTGGA  
CTTTCCTGATAGCTAATAACATATTGAAGAACGCAAGATTCTCAGATTTTGTTTCATCTTGATC  
AATGTTTCATTCTGTATCACCTTGAATACGAGTAAGTCAGGTGCATTCTGCGATTTTCATG  
ATGCGATTACTGATAGAGCAAAGATTTAACATTACAATTTGTTTTAACTCGGTATACCT  
TGTAAGTAACTTTTGGTATTCTAAGTAAAGTTTACCAAGAACATTGAATAAGTTGTTCT  
CTCTGTTTTGAGTGGTTCAAACGATTCAAACTGGTCAAGAGTCTGTCGAAGATGAGGAG  
CACGGGAATCAACTATCAATGGCAACTGAAATTTGCCACGTAGAAGAAATGCGAGCAAAA  
GTGCTCGAAAATAGTTGTTTCGAGCTTGCTGAACAGTGTTCATATTTCTGAAGGCTCCGTA  
CATACAGTTCTGATAGAATATTTAGACATGCATCGAGCTTCAGGTAACTTGTCCCGTGA  
TTGCTGCCCCGTTGAACAAAAATCTAACCGAAAGTCAATTTCCCTTTAGCTCCTTGGA  
TCTAACTCTAATCCTACATTTTGGATAGGATAATTTTCGGTGGCAAACTTGAGTGTAC  
GGCTACGATATGGAATCGAACTCCAATCATCCTCGTGGGTTGAAAAAGGTAGTGCAAGA  
GGACCGAAAAAAAAGAGAAAAAGTTCGGTCGGACATAAAAATCGCAGAACACCCATGAGGT  
TGCCTTACTTCAAGCAACGAACAAATAAGGTAATTAAGATTTTTTTTTGTGAATCTACC  
GTTCTTAA

--

>Btmar1.8.2\_gi-1092436272-gb-MAMS01009266\_1-:165625-166381  
gi-1092436272-gb-MAMS01009266.1-:165625-166381 Bemisia tabaci isolate MEAM1 Scaffold46539,  
whole genome shotgun sequence 757 bp

CATGCGATCACTGACAGAGCAAAGATTCAACACTAAATTTGTTTTCAGCTCGGTATACC  
TTGTACCGAACTTTTGGTATATGCTAAGAAAAGTTTACCATGATCATTGTATGAGATGT  
TCCCACTGTTTTGAATGGGTAAACGATTCAAACTGGTCAGGAGTTCGTTAAAGATGAG  
GAGCGTGGGAATAATCGACCCTCAACGGCGACTGACATTTGTACGTGGAAGAAATGCGG  
GCAAAAGTGCTCGAAAATGGTCGTTTCGAGCTTGTTGAACAAAGTCATATTTCTGAAGGC  
TCTGTACATACAATTTGATAGAATATGTAGACACGCATCGAGTTTCAGGTACACTTGCC  
CCTTGATTGTCGTCCTTTGAACGAAAATCCAACCAATGTCAAATTACCTTTAGCTGCTT  
GAACGTTCTAACAATGATCCTACATTTTGGATAGGATAATTTTCGGTGACAATACTTTA

GTGTACGGCTACGATATGGAGACGAACTCCAATCGTCCTTGTGGGTTGAAAAATGTTGT  
GCAAGACCGAAAAAAGAGAGACAAGTTCGGTCAAACATAAAAATCGCAAAACACCCCTTGA  
GGTTGCCTTACTTCAAGCCACATACCAACGAAGCTAATTACGATTTTTCAAATTTGTGAA  
CGTAGCGTTCTTAAATATATTTTCAGCTATCAGAAAAGCTCAAGAAAACGTAATTTGGAC  
GCATTGTAGGCTAGTTATGACAAAAATCCGGTTTCTA

--

>Btmar1.8.3\_gi-1092455142-gb-MAMS01000117\_1-:3884741-3885707  
gi-1092455142-gb-MAMS01000117.1-:3884741-3885707 Bemisia tabaci isolate MEAM1 Scaffold382,  
whole genome shotgun sequence 967 bp

ATACGAGGTCTGTTAGATTAGAAACCGGATTTTGGTCATAAGTAGCCCAACGCGTCCG  
AATTAGGTTTTCTTGAGCTTTCCTGATAGCTGGAAATATACTTAAGAACGCTACGCTCAC  
AGATTTTTATTATTTTGATCAGTGTTAATCTGTGTCATCTTGAATACGAGTAAGTCAGG  
TACGTTTTGCGATTTTCATCATGTGATCACTGATAGAGCAAAGATTCAACATTAAATTTT  
GTTTTAAACTCGGTATACCTGTACCGAACTTTTGGTACATGCTAAGTAAAGTTTATCAT  
GATCATTGTATGAGATGTTCCCACTGTTTTGAATGGGTAAACTATTCAAACCTGGTCAG  
GGGTTTCGTCAAAGATGAGGAGCATGGGAATCGACCCTCAACGGCAACTGACATTTGTCAC  
GTGGAAGAAGTGCGGGCAAAAGTGCTCGAAAGTGGTCGTTTCGAGCTTGTTGAACAGAGT  
AATATATCTGAACGCTCTGTACATACAATTTTGATAGAATATGTAGACACGCATCGAGTT  
TCAGGTA CTCTTGCCCCTTGATAGTTGTCCGTTGAACGAAAATCCAACCAAATGTTAATT  
TCCCTTTAGCTGCTTGAACGTTCTAACAATGATCCTACATTTTTGGATAGGGTAATTTTC  
GGTGACAATACTTTAGTGACGGCTATGATATGGAGATGAACTCCAATCGTCCTTGTGG  
GTTGAAAAATATCGTGCAAGACCGAAAAAAGAGAGTCAAGTTCGGTCAAACATAAAAATC  
GCAAAACACCCCTTGAGGTTCCCTTACTTCAAGCCACATACCAACGAAGCTAATTAGGATT  
TTTCAAGTTTGTGAACGTTAGCGTTCTTAAATATATTTTCAGCTATCAGAAAAGCTCAAG  
AAAACGTAATTTGGACGCATTGTGGGCTAGTTATGACCAAATTTGGTTTCTAATCTAAC  
AGACCTC

--

>Btmar1.8.4\_gi-1092455272-gb-MAMS01000090\_1-:876687-877656

gi-1092455272-gb-MAMS01000090.1-:876687-877656 Bemisia tabaci isolate MEAM1 Scaffold300, whole genome shotgun sequence 970 bp

ATACGAGGTCTGTTAGATTAGAACTGGATTTTGGTCATAACTAGCCCATAATGCGTCCG  
AATTGAGTTTTCTTGAGCTTTCCTGATAGCTTAAATATACTTAAGAACGCTACGTTAC  
AGATTTTGTTATTTTGATCTGTGTTTATTCTGTGTCATCTGAATACGAGTAAGTCAGG  
TGCGTTTTGCGATTTTAGCATGCGATCACTGACAGAGCAAAGATTCAACATTAAATTTTG  
TTTTAACTCGGTATACCTTGTACCGAACTTTTGGTATATGCTAAGAAAAGTTTACCAT  
GATCATTGTATGAGATGTTCCCACTGTTTTGAATGGGTAAACGATTCAAACTGGTCAG  
GAGTTCGTCAAAAATGAGGAGCATGGGAATCAACCCTCAACGGCGACTGACATTTATCAC  
GAGGAAGAAATGCGGGCAAAAAGTGCTCGAAAATGATCGTTTCGAGCTTGTTGAACAGAGT  
AATATTTCTGAAGGCTCTGTACATACAATTTTGATAGAATATGTAGACACGCATCGAGTT  
TCAGGTACACTTGCCCCTTGATTGTTGTCCGTTGAACGAAAATCCAACCAATGTCAAAT  
TACCTTTAGCTGCTTGAACGTTCTAACAATGAGCCTACATTTTGGATAGGATAATTTT  
GGTGACAATACTTTAGTGACGGCTACGATATGGAGACGAACTCCAATCGTCCTTGTGG  
GTTGAAAATGTTGTGCAAGACCGAAAAAAGAGAGACAAGTTCGGTCAAACATAAAAATC  
GCAAAACACCCTTGAGGTTGCCTTACTTCAAGCCACATACCAACGAAGCTAATTAGGATT  
TTTCAAATTTGTGAACGTAGCGTTCTTAAATATATTTTCAGCTATCAGAAAAGCCCAAGA  
AAACGTAATTTGGATGCATTGTAGGCTAGTTATGACCAAAATCCGTTTCTAAATCTAAC  
AGACCTCGTA

--

>Btmar1.8.5\_gi-1092455060-gb-MAMS01000144\_1-:178577-179543

gi-1092455060-gb-MAMS01000144.1-:178577-179543 Bemisia tabaci isolate MEAM1 Scaffold469, whole genome shotgun sequence 967 bp

ATACGAGGTCTGTTAGATTGGAAACCGGATTTTGGTCATAACTAGCCCACAATGCGTCCG  
AATTAGGTTTTCTTGAGCTTTCCTGATAGCTGCAAATATACTTAAGAACGCTACGTTAC  
AGATTTTGTTATTTTGATCATTGTTTATTCTATGTCATCTTGAATACGAGTAAGTTAGG  
TGCGTTTTGCGATTTTCATCATGCTATCACTAATAGAGCAAAGATTCAACATTAAATTT  
GTTTTAACTCGGTATACCTGGTACCGAAAATTTTGGTATATGCTAAGTAAAGTTTACCA  
TGATCATTGTATGAGATATTCCCACTGTTTTGAATGAGTTTAAACGATTCAAACTGGTCA

GGAATTTGTCAAAGATGAGGAGCATGGAATCTACCCTCAACGGCAACTGACATTTGTCA  
CGTGGAAGAAGTGCGGGCAAAAGTGCTCGAAAATGGTCGTTCCGAGCTTTTGTAGCAGTG  
TAATATTTCTGAAGGCTCTGTACATACAATTTTGATAGAGTATGTAGACACGAATCGAGT  
TTCAGGTATACTTGCCCCTTGATTGTTGTCCGTTGAACGAAAATCCAACCAAATGTCAAT  
GTCCCTTTAGCTGCTTGAACGTTCTAACAATGATCCTACATTTTGGATAGGATCATTTT  
CGGTGACAATACTTTAGTGTACGGCTACGATATGGAGACGAACTCCAATCGTCCTTGTG  
GGTTGAAAAATGTAGTGCAAGACCGAAAAAGAGAGACAAGTTCGGTCAAACATAAAAGT  
CGCAAAACACCCTTGAGGTTGCCTTACTTTAAGCCACATACCAACGAAGCCAATTAGGAT  
TTGTCAAATTTGTGAACGTAGCGTTCTTGAATATATTTTACCTATCAGAAAAGCTCAAG  
AAAACGTAATTTGGACGCATTGTGGGCTAGTTATGACCAAAATCCGGTTTCTAATAACAG  
ACCTCGT

--

>Btmar1.8.6\_gi-1092455544-gb-MAMS01000025\_1-:7752646-7753614  
gi-1092455544-gb-MAMS01000025.1-:7752646-7753614 Bemisia tabaci isolate MEAM1 Scaffold147,  
whole genome shotgun sequence 969 bp

ATACGAGGTCTGTTAGATTAGAAACCGGATTTTGGTCATAACTAGCCCACAATGCGTCCG  
ATTTAGGTTTTCTTGAGCTTTCCTGATAGCTGGAAATATACTTAAGAACGCTACGTTAC  
AGATTTTGTTATTTTGATCAGTGTTTATTCTGTGTCATCTTGAATACGAGTAAGTCAGG  
TGCGTTTTGCGATTTTAGCATGCGATCACTGACAGAGCAAAGATTCAACACTAAATTTTG  
TTTTAAACTCGGTATACCTTGTACCGAACTTTTGGTATATGCTAAGAAAAGTTTACCAT  
GATCATTGTATGAGATGTTCCCACTGTTTTGAATGGGTAAACGATTCAAAACTGGTCAG  
AAGTTCGTAAAGATGAGGAGCGTGGAATCGACCCTCAACGGCGACTGACATTTGTAC  
GTGGAAGAAATGCGGGCAAAAGTGCTCGAAAATGGTCGTTTCGAGCTTGTTGAACAAAGT  
CATATTTCTGAAGGCTCTGTACATACAATTTTGATAGAATATGTAGACACGCATCGAGTT  
TCAGGTACACTTGCCCCTTGATTGTTGTCTTTGAACGAAAATCCAACCAAATGTCAAAT  
TACCTTTAGCTGCTTGAACGTTCTAACAATGATCCTACATTTTGGATAGGATAATTTTA  
GGTGACAATACTTTAGTGTACGGCTACGATATGGAGACGAACTCCAATCGTCCTTGTGG  
GTTGAAAAATGTTGTGCAAGACCGAAAAAGAGAGACAAGTTCGGTCAAACATAAAAAATC  
GCAAAACACCCTTGAGGTTGCCTTACTTCAAGCCACATACCAACGAAGCTAATTAGGATT  
TTTCAAATTTGTGAACGTAGCGTTCTTAAATATATTTTACGCTATCAGAAAAGCTCAAGA

AAACGTAATTTGGACGCATTGTAGGCTAGTTATGACCAAATCCGGTTTCTAATCTAACA  
GACCTCGTA

--

>Btmar1.8.7\_gi-1092455544-gb-MAMS01000025\_1-:4600522-4601495  
gi-1092455544-gb-MAMS01000025.1-:4600522-4601495 Bemisia tabaci isolate MEAM1 Scaffold147,  
whole genome shotgun sequence 974 bp

ATACGAGGTCTGTTAGATTAGAAACCGGATTTTGGTTATAACTAGCGCACAAATGCGTCGA  
AATTACGTTTTCTTGAGCTTTTCTGATAGCTGGAAATATACTTTAGAACGCTACGTTTAC  
ATATTTGATTTATTTTGATCAGTGTTTATTCTGTGTCATCTTGAATACGAGTAAGTCAGG  
TGCGTTTTGCGATTTTCATCATGCGATCACTGATAGAGCAAAGATTCAACGTTAAATTTT  
GTTTTAACTCGGTATACCTTGACCAAACTTTTGGTATACGCTAAGTAAAGTTTACCA  
TGATCATTGTATGAGATGTTCCCACTGTTTTGAATGAGTTACTTAAACGATTCAAACTG  
GTCAGGAGTCCGTCAAAGATGAGGAGCATGGGAATCGACCCTCAACGGCAACTGACATTT  
GTCACGTGGAAGAAATGCGGGCAAAAGTGCTCGAAAACGGTCGTTTCGAGCTTGTTGAAC  
AGAGTAATATTTCTGAAGGCTCTGTACATACAATTTTGATAGAATATATAGACACGCATC  
AAGTTTCAGGTACACTTGCCTCTTGATTGTTGTCCGTTGAACGAAAATCCAACCAAATAT  
CAATTTCCCTTTAGCTGCTTGAACGTTCTAACAGTGATCCTATATTTTTGGATAGGATAA  
TTTTCGGTGACAATATTTAGTGTACGGCTACGATATGGAGACAAAACCTCCAATCGTCCT  
TGTGGGTTGAAAAATGTAGTGCAAGACCGAAAAAGAGAAACAAGTTCGGTGAAACATAA  
AAATCGCAAAACACCTTGAGGTTGAATTACTTCAAGCTACATACCAACGAAGCTCATT  
GGATTTTTCAAACCTGTGAACGTAGCGTTCTTACGTATAGTTCCAGCTATCAGAAAAGCT  
CAAAAAACGTGAATTGGACGCATTGTAGGCTAGTTATGACCAAATCCGGTTTCTAATC  
TAACAGACCTCGTA

>Btmar1.8.8\_gi-1092455544-gb-MAMS01000025\_1-:6438386-6439353  
gi-1092455544-gb-MAMS01000025.1-:6438386-6439353 Bemisia tabaci isolate MEAM1 Scaffold147,  
whole genome shotgun sequence 968 bp

ATACGAGGTCTGTTAGATTAGAAACCGGATTTTGGTGATAACTAGCTTTCTGTGAGTCAA  
AATTAAGTTTTCTTGGACTTTTCTGATAGCTGATAACATACTAAAGAACGCTACGTTTAC  
AGATTTTGTTTATCTTGATCAGTGTTTATTCTGTGTCATCTTGAATACAAGGAAGTCAGG  
TGCGTTTTGCGATTTTCATCATGCGATCACTGATAGAGAAAAGATTTCGACATTAAATTTT



GTTTTAACTCGGTATACCTGTACCGAACTTTTGGCATATGCTAAGTAAAGTTTACCAT  
GATCATTGTATGAGATGTTCTCACTGTTTTGAATGGGTAAACGATTCAAACTGGTCAG  
GAGTTCGTCAAAGATGAGGAGCATGGGAATCGACCACCAACGGCAACTAACATTTGTTAC  
GAGGAAGAAGTGCGGGCGAAAGTCTCGAAAATGGTCGTTTTGAGCTTGCTCAACAGTGTA  
ATATTTCTGAAGGCTCTGTACATAACAATTTTGATGGAACATGTAGACATGCATAGAGTTT  
CAGGCACACTTGCCCCCTTGATTGTTGTCCGTTGAACAAAAATCCAACCAAATGTTAATTT  
CCCTATAGCTGCTTGAACGTTCTAACAATGATCCTACATTTTTGGATAGGATAATTTTCG  
GTGATAATACTTGAGTGTACGGCTACGATACGGAGACGAACTCCAATCATCCTTATGGA  
TTGAAAAATGCAGTGCAAGACCGAAAAAAGAGAGACAAGTTCGGTCAAACATAAAAAATCG  
CAAACACCCAGGAGGTTGCCGTA CTGGAAGCCACATATCAACAAAGCTAATTAAGATTT  
TTCAAATCTGTGAACGTAGCGTTCTTAAGTATATTTCCAGCAATCAGGAAAAATCAAGAA  
AACCTAATTCCGATGCACAATAGGCTAGTTATGACCAAAATCCGGTTTCTAATCTAACAG  
ACCTCGTA

--

>Btmar1.8.9\_gi-1092453460-gb-MAMS01000794\_1-:2379148-2380114  
gi-1092453460-gb-MAMS01000794.1-:2379148-2380114 Bemisia tabaci isolate MEAM1 Scaffold1185,  
whole genome shotgun sequence 967 bp

TACGAGGTCTGTTAGATTGGAAACCGGATTTTGGTCATAACTAGCCCACAATGCGTTCGA  
TTTAGGGTTTCTTGAGCTTTTCTGATAGCTAGAAATATACTTAAGAACGCTACGTTCACA  
GATTTTGTTTATTTTGATCAGTGTTTATTCTGTGTCATCTTGAATACGAATAGGTCAGGT  
GCGTTTTGCGATTTTCAGCATGCGATCACTAATAGAGCAAAGACTCAACATTTAATTTTG  
TTTTAACTCGGTATAATCTGTACCGAACTTTTGGTATGCTAAGTAAAGTTTACCAAGA  
TCATTGTATGAGATGTTCCCACTGTTTTGAGTGGGTAAACGATTCAAACTGGTCAGAA  
GTTTCGTCAAAGATGAGGAGCATGGGAATCGACCCTCAACGGCAACTGACATTTGTCACGT  
GGAAGAAGTGCGAGCAAAAGTGCTCGAAAATGGTCGTTTCGAGCTTGTTGAACAGAGTAA  
TATTTCTGAAGGCTCTGCACATAACAATTTTGATAGAATATGTAAACACGCATCGAGTTTC  
AGGTACACTTGCCCCCTTGATTGTTGTCCGTTGAACGAAAAATCCAACCAATTGTCAATTC  
CCTTAGCTGCTTGAACGTTTTAACAATGATCCTACATTTTTGGATGGGATAATTTTCG  
TGAAAATACTTTAGTGTACGGCTACGATATGGAGACGAACTCCAATCGTCCTTGTTGGGT

TCAAAAATGTAGTGCAAGACCGAAAAAAGAGAGACAAGTTCGGTCAAACATAAAAATCGC  
AAAACACCCTTGAGGTTGCCTAACTTCAAGCCACATACCAACAAAGCTAATTATGATTTT  
TCAAATTTGTGAACGTAGCGTTCTTTAATATGTTTTAGCTATCAGAAAAGCTCAAGAAA  
ACGTAATTTGGACCCATAGTAGGCTAGTTATGACCAAAATCCGGTTTCTAATCTAACAGA  
CCTCGTA

--

>Btmar1.8.10\_gi-1092453460-gb-MAMS01000794\_1-:799287-800250  
gi-1092453460-gb-MAMS01000794.1-:799287-800250 Bemisia tabaci isolate MEAM1 Scaffold1185,  
whole genome shotgun sequence 964 bp

ATACGAGGTCTGTTAGATTAGAAGCCGGATTTTGGTCATAACTAGCCCACAATGCGTCCG  
AATTAGGTTTTCTTGAGCTTTCCTGATAGCTGGAAATATACTAAAGAACGCTACGTTAC  
AGATTTTGTTATTTTGATCAGTGTTTATTCTCTGTCATTTTGAATACGAGTAAGTTAGG  
TGCATTTTGCGATTTTCATCATGCGATCACCGATAGAGCAAAGATTCAACATTTAATTTT  
GTTTTAACTTGGTATACCTGTACTGAACTTTTGGTATATGCTAAGTAAAGTTTACCA  
TGATCATTGTTTGAGATGTTCCCACTGTTTGAATGGGTAAACGATTCAAACTGGTCA  
GGAGTTCGTACAGATGAGGAGCATGGGAATTGACCCTCAACGGCAACTGACATTTGTCA  
CGTGAAAGAAGTGCGAGCAAAAGTGCTCGAAAATGGTCGTTTCGAGCTCGTTGAATAGAG  
TATTATTTCTGGAGGCTCTGTACATACAATTTTGATAGAATATGTAGACACGCATCGAGT  
TTCAGGTACACTTGCCCTTGATTGTTGTCCGTTGAACGAAAATCCAACCAAATGTCAAT  
TTCCCTTTAGCTGCTTGAACGTTCTAACAATGATCCTATACATTTTGGATAGGATAATT  
TTCGGTGACAATACTTTAGTGTACAGCTACGATATGGAAACGAACTCTAATCGTCCTTG  
TGGGTTGAAAATTTTAGTGCAAGATCGAAAAAAGAGAGATAAGTTCGATCAAACATAAAA  
ATCGCAAAAGATCCTTGAGGTTGCCTTACTTTAAGCCACATACCAACAAAATAATTAGG  
ATTTTGTGAACGTAGCGTTCTTAAATATATTTTCAGCTATCAAAAAAGCTCAATAAAACG  
TAATTTGGACGCATTGAGGGCTACTTATGACCAAAATCCGGTTTCTAATCTAACAAACCT  
CGTA

>Btmar1.8.11\_gi-1092453460-gb-MAMS01000794\_1-:1812857-1813823  
gi-1092453460-gb-MAMS01000794.1-:1812857-1813823 Bemisia tabaci isolate MEAM1 Scaffold1185,  
whole genome shotgun sequence 967 bp

ATACGAGGTCTGTTAGATTAGAAACCGGATTTTGGTCATAACTAGCTTACTGTGCGTTG

AATTAGGTTTTCTTAGACTTTTCTGATAGCTGACAACATACTAAAGAACGCTACGTTAC  
AGATTTTGTTTATTTTGATCAGTGTTTATTCTGTATCATCTTGAATACGAGGACGTCAGG  
TGCGTTTTGCGATTTTCATCATACGATCACTGACAGAGCAAAGATTTAACATTACATTTT  
GTTTCAAGCTCGGTATACCTTGTAACGAACTTTTGGTATGCTAAGTAATGTTTACCAAG  
ATCATTATAAGAGTTTTTCTCACTATTTTGAGTGGGTAAACGATTCAAACTGGTCAAG  
AGTTCGTTGAAGTTGAGGAGCATGGGAATCGACCATCAACGGCAACTAACATTTGTCACG  
TGGAAGAAGTGCGGGCAAAGTCTCGAAAATGGTCGTTTCGAGCTTGCTGAACAGTGTA  
TATTTCTGAAGGCTCCGTACATACAATTTTGATAGAATATGTAGACATGCATAGAGTTTC  
AGAGTACACTTGCCCCTTGATTGTTGTCCGTTGAACAAAATCCAACCAAATGTTAATTTA  
CCTGTAGCTGCTTGAACGTTCTAACAATGATCCTACATTTTGGATAGGATAATTTCCGG  
TGATAATACTTGAGTGTACGGCTAAGATACGGAGACGAACTCCAATCATCCTTGTTGGAT  
TGAAAAATTTAGTGCAAGACCGAAAAAGAGAGACAAGTTCGGTCAAATATAAAAAATCGC  
AAACACCCATGAGGTTGCCGTACTTGAAGCCACATACCAACGAGGCTAATTAAGATTTT  
TCAAATCTGTGAACGTAGCGTTCTTAAGTATATTTCCAGCTATCAGGAAAAATCAAAAA  
ACTTAATTTGGACGCACAATAGGCTAGTTATGACCAAATCCGGTTTCTAATCTAACAGA  
CCTCGTA

--

>Btmar1.8.12\_gi-1092455529-gb-MAMS01000026\_1:-6868567-6869531  
gi-1092455529-gb-MAMS01000026.1:-6868567-6869531 Bemisia tabaci isolate MEAM1 Scaffold15,  
whole genome shotgun sequence 965 bp

TACGAGGTCTATTAGATTAGAAACCGGATTTTGGTCATAACTAGCTTGCTGTGCGTCCGA  
ATTAGGATTTCTTGACTTTTCTGATAGCTGATAACATACTAAAGAACGCAACGTTCACT  
GATTTTGTTTATGTTGATTAGTGTTTATTCTGTGTCATCTTGAATACGAGGAAGTCAGGT  
GCGTTTTGCGATTTTCATTATGCGATCACTGACAGAGCAAAGATTTAACATTACATTTTG  
CTTTAAGCTCGGTATACCTTGTAACGAACTTTTGGTATGCTAAGTAAAGTTTACCAAGA  
TCGTTATATGAGTTGTTCTCACTATTTTGAGTGGGTAAACGATTCAGAACTGGTCAGGA  
GTTTCGTTGAAGATGAGGAGCATGGGAATCGACCATCAACGGCAACTAACATTTGTCACGT  
GGAAGAAGTGCGGGCAAAGTCTCGAAAATGGTCGTTTCGAGCTTGCTGAACAGTGTAAT  
ATTTCTGAAGGCTCTGTACATACAATTTTGATAGAATATGTAGACATGCATCGAGTTTCA  
GGTACACTTGCCCCTTGATTGTTGTCCGTTGAACAAAATCCAACCAAATGTTAATTTCCC

TATAGCTGCTGAACGTGCTAACAAATGATCCTACATTTTTGGATAGGATAATGCTCGGTG  
ATAATACTTGAGTGTACGGCTAAGATATAGAGACGAACTCCAATCATCCTTGTGGATTG  
AAAAATGTAGTGCAAGACCGAAAAAAGAGTGACAAGTTCGATCAAACATAAAAAATCGCAA  
AACACCTATGAGGTTGCCGTACTTGAAGCCACATACCAACGAAGCTAATTAAGATTTTTTC  
AAATCTGTGGACGTAGCGTTCTTAAGTATATTTTCAGCTATCAGGAAAGATCAAGAAAAC  
TAAATTTGGACGCACAGTAGGCTAGTTATGACCAAAATCCGGTTTCTAATCTAACAGACC  
TTGTA

>Btmar1.8.13\_gi-1092455529-gb-MAMS01000026\_1-:16414-17348  
gi-1092455529-gb-MAMS01000026.1-:16414-17348 Bemisia tabaci isolate MEAM1 Scaffold15, whole  
genome shotgun sequence 935 bp

GGTGATAGCTAGCCCAGTGTGCGTCCGAATTAGGTTTCCTTGGACTTTTCCGATAGCTGA  
TAACATATTGAAGAACTAGATTCACAGATTTTGTTTATTTTGATCAGTGTTTTTTCTG  
TGTCATCTTGAATACGAGTAAGGCAGGAGCGCTCTGCGATTTTCATCATGCGATCACTGA  
CAGAGCAAAGATTTAACATTACATTTTTTTTAACTCTGTATACCTTGTATCGAACTTT  
TGGTATACTAAGTAAAGTTTACCAAGATCATTGTATGAGTTGTTCTCACTGTTTTGAATG  
GGTTAAACGATTCAAATCTGGTCAGGAGTTCGTGCAAGATGAGTAGCACGGGAATCGACC  
ATCAACGGCAACTGACATTTGTACGTGGAAGGAGTGCGGGCAAAAGTGCTCGAAAATAG  
TCGTTTCGAGCTTGCTGAACAGTATAATATTTCTGAAGGCTCTGTACATTTAATTTTGAT  
AGAATATGTAGACATGCATCGAGTTTCAGGTACACTTGCCCCTTGATTGTTGTCCGTTGA  
ACAAAAATCCAAGTGAATGTCAAATTCCTTTAGCTGCTCGAACGTTCTAACAATGATCC  
TACATTTTTGGATTGGATAATTTTCGGTGACAATACTTGAGTGTCCGGCTACGATATGGA  
GACGAACTCCAATCATCCTTGTGGGTTGAAAAATGTAGTGCAAGACCGAAAAAAGAGAG  
ACAAGTTCGGTCAAACATAAAAAATCGCAGAACACCCATGAGGTTGCCTTACTTCAAGCCA  
CATAACAACGAAGCTAATTGGGATTTTTTCAAATTTGTGAACGTATCGTTCTTTAGTATA  
TTTATAGCTAACAGGGAAGTTCAAGAAAACCTGATTCGGACGCATTGTGGGCTAGTCATG  
ACCAAAATCCGGTTTCTAATCTAACAGACCTCGTA

--

>Btmar1.8.14\_gi-1092453165-gb-MAMS01000916\_1-:5130930-5131897  
gi-1092453165-gb-MAMS01000916.1-:5130930-5131897 Bemisia tabaci isolate MEAM1 Scaffold1224,  
whole genome shotgun sequence 968 bp

ATACAAGGTCTGTTAGAAATAGAAACCGGATTTTGGTCATAACTAGCTCACAATGCGTCCG  
AATTAGGTTTTCTTGAGCTTTTATGATAGCTGAAAATATACTTAAGAACGCTACGTTAC  
AGATTTTGTTTATTTGATCAGTGTTTATTCTGTGTCATCTGAATACAAGTAAGTCAGG  
TGCGTTTTGCGATTTTCAGCATGCGATCACTGATAGAGCAAAGACTCAACATTTAATTTT  
GTTTTAACTCGGTATACCTTGACCGAACTTTTGTTATGCTAAGTAAAGTTTACCAAG  
ATCATTGTATGAGATGTTCCCACTGTTTTGAGTGGGTAAACGATTCAAACTGGTCAGG  
AGTTCGTCAAGATGAGGAGTATGGGAATCTACCCTCAACGGCAACTGACATTCGTCACG  
TGGAAGAAGTGCGGGCAAAGTGCTCGAAAATGGTCGTTTCGAGCTTGTTGAACAGAGTA  
ATATTTCTGAAGGCTATGTGCATACAATTTTGATAGAATATGTAGACACGCATCGAGTTT  
CAGGTACACTTACCCCTTGATTGTTGACCGTTGAACGAAAATCCAACCAAATGTCAATTT  
CCCCTAGCTGCTTGAACGTTCTAACAATGATCCTACATTTTGGATAGGATAATTTTCT  
GTGACAATACTTTAGTGTACGGCTACGATATGGAGACGAACTCCAATCGTCCTTGTTGGG  
TTGAAAAATGTAGTGCAAGACCGAAAAAAGAGAGACAAGTTCGGTCAAACATAAAAAATCG  
CAAACACCCCTTGAGGTTGCCTTACTTCAAGCCACATACCAACAAAGCTAATTATGATTT  
TTCGAATTTGTGAACGTAGCGTTCTTAAATATATTTTCAGCTATCAGAAAAGCTCAAGAA  
AACGTAATTTGGACGCATTGTGGGCTAGTTATGACCAAATCCGGTTTCTAATCTAACAG  
ACCTCGTA

--

>Btmar1.8.15\_gi-1092455378-gb-MAMS01000055\_1-:3964479-3965449  
gi-1092455378-gb-MAMS01000055.1-:3964479-3965449 Bemisia tabaci isolate MEAM1 Scaffold226,  
whole genome shotgun sequence 971 bp

ATACGAGGTCTGTTAGATTAGAAACCGGATTTTGGTCTTAAGTGGCCCAATGCGTCCG  
AATTAGGTTTTCTTGAGCTTTCCTGGATAGCTGGAAATATACTTAAGAACGCTACGTTCA  
CAGATTTTGTTTACTTTGATCAGTGTTTAGTCTGTGTCATCTGAATACGAGTAAGTCAG  
GTGCGTTTTGCGATTTTCATCATGCGATCACTGATAGAGCAAAGATTCAACATTAAATTT  
TGTTTTAACTCGGTACACCTTGACCGAACTTTTGGTATATGCTAAGTAAAGTTTACC  
ATGATCATTGTATGAGATGTTCCCACTGTTTTGAATGGGTAAACGATTCAAAGCTGGTC  
AGGAGTTCGTCAAAGATGAGGAGCATGGGAATCGACCCTCAACGGCAACTGACATTTGTC  
ACGTGGAAGAAGTGCGGGCAAAGTGCTCGAAAATGGTCGTTTCGAGCTTGCTGAACAGA

GTAATATTTCTGAAGGCTCTGTACATACAATTTTGATAGAATATGTAGACACGCATCGAG  
TTTCAGGTACACTTGCCCCTTGATTGTCGTCCGTTGAACGAAAATCCAACCAATGTCAA  
TTCCCTTTAGCTGCTTCAACGTTCTAACAATGATCCTACATTTTTGGGTAGGATGATTT  
TCGGTGACAATACTTCAGTGACGGCTACGATATGGAGACGAACTCCAATCGTCCTTGT  
GGGTTGAAAAATGTAGTGCAAGACCGAAAAAAGAAAGACAAGTTCGGTCAAACATAAAAA  
TCGCAAAACACCCTTGAGGTTGCCTTATTTCAAGCCACATACCAACGAAGCTAATTAGGA  
TTTTTCAAATTTGTGAACGTAGCGTTCTTAAATATATTGTCAGCTAGCAGAAAAGCTCAA  
GAAAACGTAATTTGGACGCATTGTGGGCTAGTTATGACCAAAATCCGGTTTCTAATCTAA  
CAGACCTCGTA

>Btmar1.8.16\_gi-1092455378-gb-MAMS01000055\_1-:2990060-2991026  
gi-1092455378-gb-MAMS01000055.1-:2990060-2991026 Bemisia tabaci isolate MEAM1 Scaffold226,  
whole genome shotgun sequence 967 bp

TACGAGGTCTGTTAGATTAGAAACCGGATTTTGGTCATAACTAGCCCACAATGCGTCCGA  
ATTAGGTTTTCTTGAGTTTTCTGATAGCTGGAAATATACTTAAGAACGCTACGTTACA  
GATTTTGTTTATTTTGATCAGTGTTTATTCTGTGTCATCTTGAATACGAGTAAGTCAGGT  
GCGTTTTGCGATTTTCAGCATGCGATCACCTATAGAGCCAAGACTCAACATTTAATTTTG  
TTTTAACTCGGTATACCTTGTAACAAAACCTTTGGTATGCTAAGTAAAGTTTACCAAGA  
TCATTGTATGAGATGTTCCCACTGTTTTGAGTGGGTAAACGATTCAAACTGGTCAGGA  
GTTTCGTCGAAGATGAGGAGTATGGGAATCAACCCTCAACGGCAACTGACATTTGTCACGT  
GGAAGAAGTGCGGGCAAAAGTGCTCGAAAATGGTCATTTCGAACTTGTTGAACAGAGTAA  
TATTTCTGATGGCTCTGTACGTACAATTTTGATAGAATATGTAGACACGCATCGAGTTTC  
AGGTACACTTGCCCCTTGATTGTTGTCCGTTGAACAAAAATCCAACCAATGTCAATTTTC  
CCTTTAGCTGCTTGAACGTTCTAATAATGATCCTACATTTTTGGATAGGATAATTTTCGG  
TGACAATACTTAAGTGTACGGCTACGATATGGAGACGAACTCCAATCGTCCTTGTGGGT  
TGAAAAATGTTGTGCAAGACCGAAAAAAGAGAGACAAGTTCGGTCAAACATAAAAAATCGC  
AAAACACCCTTGAGGTTGCCTTACTTCAAGCCACATAGCAACAAAGCTAATTATGATTTT  
TCAAATTTGTGAACGTAGCGATCTTAAATATATTTTCAGCTATCAGAAAAGCTCAAGAAA  
ACGTAATTTGGACGCATTGTGGGCTAGTTATGACCAAAATCCGGTTTCTAATCTAACAGA  
CCTCGTA

--

>Btmar1.8.17\*\_gi-1092453251-gb-MAMS01000883\_1-:1321074-1322051  
gi-1092453251-gb-MAMS01000883.1-:1321074-1322051 Bemisia tabaci isolate MEAM1 Scaffold1214,  
whole genome shotgun sequence 978 bp

ATACGAGGTCTGTTAGATTAGAAACCGGATTTTGGTCATAACTGGCCCACAATGCGTCCG  
AATTAGGTTTTCTTGAGCTTTCCCGATAGCTGAAAATATATTTAAGAACGCTACATTAC  
AGATTTTGTTATTTTGATTAGTGTTTATTCTGTGTCATCTGAATACGAGTAAGTCAGG  
TGCGTTTTGCGATTTTCATCATGCGATCACTGATAGAGCAAAGATTAAACATTGAATTTT  
TTTTTTAAACTCGGTATACCCTGTACCGAAACTTTTGGTAAATGCTAAGTAAAGTTTACC  
ATGATCAATGATCATTGTGCGAGATTTTCCCACTGTTTCGAATGGGTAAACTGTTCAAA  
ACTGGTCAGGAGTTCGTCAAAGATGAAGAGCATGGGAATCGACCTTCAACGGCAACTGAC  
ATTTGTCACGTGGAAGAAATGCAGGCAAAAGTGCTCGAAAATGGTCGTTTCGAGTGTGTT  
GAACAGAGTAATATTTTTGAAGGCTCTGTACATACAATTTTGATAGAATATGTAGACATG  
CATCGAGTTTCAGGTACACTTGCCCTTGATTGTTGTCCGTTGAACGAAAATCCAACCAA  
ATGTTAAAATCCCTTAGCTGCTTGAACGTTCTAACAATGATCCTACATTTTGGATAAG  
ATAATTTTCGGTGACAATACTTTAGTGTACGGCTACGATATGGAGACGGAACCTCCAATCG  
TCCTTGTTGGGTGAAAAATGTAGTGCAAGACCGAAAAAAGAGAGACAAGTTCGGTCAAAC  
ATAAAAATCGCAAAACACCCTTGAGGTTGCCTTACTTCAAGCCACATACCAACGAAGCTA  
ATTAGGATTTTCAAATTTGTGAACGTAGCGTTCTTGAATATATTTTCAGCTATCAGAAA  
AGCTCAAGAAAACGTAATTTGGACGCATTGTGGGCTAGTTATGACAGAAATCCGGTTTCT  
AATCTAACAGACCTCGTA

--

>Btmar1.8.18\_gi-1092455591-gb-MAMS01000016\_1-:877465-878431  
gi-1092455591-gb-MAMS01000016.1-:877465-878431 Bemisia tabaci isolate MEAM1 Scaffold132, whole  
genome shotgun sequence 967 bp

TACGAGGTCTGTTAGATTAGAAACCGGATTTTGGTCATAACTAGCTTACTGTGCGTTCGA  
ATTAGGTTTTCTTAGACTTTTCTGATAGCTGACAACATACTAAAGAACGCTACGTTACA  
GATTTTGTTTATTTTGATCAGTGTTTATTCTGTGTCATCTTGAATACGAGGAAGTCAGGT  
GCGTTTTGCGATTTTCATCATACGATCACAGACAGAGCAAAGATTTAACATTACATTTTG  
TTTCAAGCTCGGTATACCTTGTACCGAAACTTTTGGTATGCTAAGTAATGTTTACCAAGA  
TCATTATATGAGTTTTTCTCACTATTTTGAGTGGGTAAACGATTCAAACTGGTCAGGA

GTTTCGTTGAAGTTGAGGAGCGTGGGAATCGACCATCAACGGCAACTAACATTTGTTACGT  
GGAAGAAGTGCGGGCAAAAGTCTCGAAAATGGTCGTTTCGAGCTTGCTGAACAGTGTAAT  
ATTTCTGAAGGCTCTGTACATACAATTTTGATAGAATATGTAGACATGCATAGAGTTTCA  
GAGTACACTTGCCCCTTGATTGTTGTCCGTTGAACAAAATCCAACCAAATGTTAATTTAC  
CTGTAGCTGCTTGAACGTTCTAACAATGATCCTACATTTTTGGATAGGATAATTTTCGGT  
GATAATACTTGAGTGTACGGCTAAGATACGGAGACGAAACTCCAATCATCCTTGTGGATT  
GAAAAATTTAGTGCAAGACCGAAAAAGAGAGACAAGATCGGTCAAATATAAAAAATCGCA  
AAACACCCATGAGGTTGCCGTACTTGAAGCCACATACCAACGAGGCTAATTAAGATTTTT  
CAAATCTGTGAACGTAGCGTTCTTAAGTATATTTCCAGCTATCATGGAAAGATCAAAAAA  
ACTTAATTTGGACGCACAATAGGCTAGTTATGACCAAAATCCGGTTTCTAATCTAACAGA  
CCTCGTA

--

>Btmar1.8.19\_gi-1092450672-gb-MAMS01002091\_1-:3456262-3457230  
gi-1092450672-gb-MAMS01002091.1-:3456262-3457230 Bemisia tabaci isolate MEAM1 Scaffold1685,  
whole genome shotgun sequence 969 bp

TACGAGGTCTGTTAGATTAGAAACCGGATTTTGGTCATAACTAGCCCACAATGCGTCCGA  
ATTAGGTTTTCTTGAGCTTTCCTAATAGCTGGAAATATATTTAAGAACGTTACGTTTCGCA  
GATTTTATTTATTTTGATCAGTGTTTATTCTGTGTCATCTTGAATACGAGTAAGTCAGGT  
GCGTTTTGCGATTTTCATCATGCGATCACTGATAGAGCAAAGATTCAACATTAAATTTTG  
TTTTAAACTCGGTATACCTTGTAACCGAACTTTTGGTATATGCTAAGTAAAGTTTACCAT  
GATCATTTTATGAGATGTTCCCACTGTTTGAATGGATTAAACGATTCAAACTGGTCAG  
GAGTTCGTCAAAGATGAGGAGCATGGGAATCGACCCTCAACGGCAACTGACATTTGTCAC  
GTGGAAGATGTGCGGGCAAAAGTGCTCGAAAATGGTCATTTTCGAGCTTGTTGAACAAAAT  
AATATTTCTGAAGGCTCTGTACATACAATTTTGATAGAATATGTAGACACGCATCGAGTT  
TCAGGTACACTTGCCCCTTGATTGTTGTCCGTTGAACGAAAAGCCAACCAAATGTCAATT  
TCCCTGTAGCTGCTTGAACGTTCTAACAATGGTCCTACATTTTTGGATAGGATAATTTTC  
GGTGACAATACTTTAGTGTACGGCTACGATATGGAGACGAAAATCCAATCGTCTTTGTGG  
GTTGAAAATGTAGTGCAAGACCGAAAAAGAGAGACAAGTTCGGTCAAACATAAAAAATC  
GCAAAACACCATTGAGGTTGCCTTACTTCAAGCCACATACCAACGAAGCTAATTAGGATT



TTTCAAATTTGTGATCGTAGCGTTCTTATATATATTTTCAGCTATCAGAAAAGCTCAAGA  
AAACGCAATTCGGACGCATTGTGGGCTAGTTATGACCAAATCCGGTTTCTAATCTAACA  
GACCTCGTA

>Btmar1.8.20\_gi-1092450672-gb-MAMS01002091\_1-:474495-475464  
gi-1092450672-gb-MAMS01002091.1-:474495-475464 Bemisia tabaci isolate MEAM1 Scaffold1685,  
whole genome shotgun sequence 970 bp

ATACGAGGTCTGTTAGATTAGAAACCGGATTTTGGTCATAACTAGCCCACAATGCGTTTCG  
AATTAGGTTTTCTTGAGCTTTTCTGATAGGTGGAAATATACTTAAGAACGCTACGTTTAC  
AGATTTTGTTATTTTGATCAGTGTTTATTCTGTGTCATCTTGAATACGAGTAAGTCAGG  
TGCGTTTTGCGATTTTCATCATGCGTTCACTGATAGAGCAAATATTCAACATTAAATTTT  
GTTTTAACTCGGTACACCTTGTAACCGAACTTTTGGTATATGCTAAGTAAAGTTTACCA  
TGATCATTGCATGAGATGTTCCCACTGTTTTGAATGGGTAAACTATTCAAACTGGTCA  
GGAGTTCGTCAAAGATGAGGAGCATGGGAATCGACCCTCAACGGCAACTGACATTTGTCA  
CGTGGAAGAAGTGCGGGCAAAAGAGCTCGAAAATGGTCGTTTCGAGCTTGTTGAACAGAG  
TAATATTTCTGAAGGCTCTTTACATACAATTTTGATAGAATATGGAGACACGCATCGAGT  
TTCAGGTACACTTGCCCTTGATTCTTGTCGGTTGAACGAAAATCCAACCAATGTCATT  
TTCCCTTTAGCTGCTTGAACGTTCTAACAATGATCCTACATTTTGGATAAGATACTTTT  
CGGTGAAAATACTGTACTCTACGGCTACGATATGGGGACGAACTCCAATCGTCCTTGTG  
GGTTGAAAAATGTAGTGCAAGACCGAAAAAAGGGAGACAAGTTCGGTCAAACATAAAAAAT  
CGCAAAACACCTTGAGGTTGCCTTACTTCAAGCCACATACCAACGAAGCTAATTAGGAT  
TTTTCAAATTTGTGAAAGTAGCGTTCTTAAACATATTTCCAGCTATCAGAAAATCTCAAG  
AAACGTAATTTGGACGCATTGTGGGTGAGTTATGACCAAATCCGGTTTCTAATCTAAC  
AGACCTCGTA

>Btmar1.8.21\_gi-1092450672-gb-MAMS01002091\_1-:275017-275982  
gi-1092450672-gb-MAMS01002091.1-:275017-275982 Bemisia tabaci isolate MEAM1 Scaffold1685,  
whole genome shotgun sequence 966 bp

ATACGAGGTCTGTTAGATTAGAAACCGGATTTGGTCATAACTAGCCCACAATGCGTCCGA  
ATTAGGTTTTTTTTAGCTTACCTGATAGCTGGAAAGGTACTAAAGAACGCTACGTTTACA  
GATTTTGTTATTTTGATCAATTCTGTGTCATCTTGAATACGAGTAAGTCAGGTGCGTTT  
TGCGATTTTCATCATGCGATCATTGATAGAGCAAAGGTTCAACATTAAATTTGTTTTAA

ACTCGGTATACCTTGTACCGAACTTTTGGTATATGCTAAGTAAAGTTTACCATGATCAT  
TGTATGAGATGTTCCCACTCTTTTGAATGGGTAAACGATTCAAACTGGTCAGGAGTTC  
GTCAAAGATGAGGAGCATGGGAATCGACCCTCAACGGCAACTGACATTTGTCACGTGGAA  
GAAGTGCGGGCAAAAGTGCTCGAAAATGGTCGTTTCGAGCTTGTTGAACAGAGTAATATT  
TCTGAAGGCTCTGTACATACAATTTTGTAGAATACCTATGTAGACACGCATCGACTTTCA  
GGTACAGTTGTCCCTTGATTGTTGTCCGTTGAACGAAAATCCAACCCAATGTCAATTTCC  
CTTTAGCTGCTTGAACGTTCCAACAATGATCCTACATTTTGGAAAGGATAATTTTCGGT  
GACAATACTTTAGTGTACGGCTACGATATGGAGACGAACTCCAATCGTCCTTGTTGGGT  
GAAAAATGTAGTGCAAGACCGAAAAAAGAGAGTTAAGTTCGGTCAAACATAAAAAATCGCA  
AAACACCCTTGAGGTTGCCTTACTTCAAGCTACATACCAACGAAGCTAATTAGAATTCTT  
CAAATTTGTGAACGTAGCGTTCTTAAATATATTTTACCTATCAGAAAAGCTCAAGAAAA  
CGTAATTTGGACGCATTGTGGGCTAGTTATGACCAAAATCCGGTTTCTAATCTAACAGAC  
CTCGTA

--

>Btmar1.8.22\_gi-1092455410-gb-MAMS01000046\_1-:373759-374730  
gi-1092455410-gb-MAMS01000046.1-:373759-374730 Bemisia tabaci isolate MEAM1 Scaffold20, whole  
genome shotgun sequence 972 bp

ATACGAGGTCTGTTAGATTAGAAACCGGATTTTGGTCATTTCTACCCCACAATGCGTCCA  
AATTACGTTTCCTTGAGCTCTTCTGATAGCTGGAAATATACTTAAGAACGCTACGTTAC  
AGATTTTGTATTTTATTTGATCAGTGTTTATTCTGTGTCATCTTGAATACGAGTAAGTCAGG  
TGCGTTTTGCGATGTTTCATCATGCGATCACTGATAGAACAAAGATTCAACATTAAATTTT  
GTTTTAACTCGGTATACCTTGTACCAAACTTTTGGTATACGCTGAGTAAAGTTTACCA  
TGATCATTGTATATGGGATGTTCCCACTGTTTTGAATGAGTTAAACGATTCAAACTGGT  
CAGGAGTTTGTCAAAGATGAGGAGCATGGGAATCGATCCTCAACGGCAACTGACATTTGT  
CACGTGGAAGAAATGCGGGCAAAAGTGCTCGAAAACGGTCGTTTCGAGCTTGTTGAACAG  
AGTAATATTTCTGAAGGCTCTGTACATACAATTTTGTAGAATATGTAGACACGCATCGA  
GTTTCAGGTACACTTGCCCCTTGATTGTTGTCCGTTGAACGAAAATCCAACCAAATGCCA  
ATTTCCCTTTAGCTGCTTGAACGTTCTAACAGTGATCCTACATTTTGGATAGGATAATT  
TTCGGTGACAATATTTTAGTGTACGGCTACGATATGGAGACAAAACCTCCAATCGTCCTTG

TGGGTTGAAAAATGTAGTGCAAGACCGAAAAAAGAGAGACAAGTTCGTTGAAACATAATA  
ATCGCAAAACACCCCTTGAGGTTGCCTTACTTCAAGCCACATACCAACGAAGCTCATTAGG  
ATTTTCAAACCTTATGAACGTAGCGTTCTTAAGTATATTTCCAGCTATCAGAAAAGCTCA  
AGAAAACGTAATTTGGACGCATTGTGGGCTAGTTATGACCAAAATCCGGTTTCTAATCTA  
ACAGACCTCGTA

--

>Btmar1.8.23\_gi-1092455566-gb-MAMS01000020\_1-:2755399-2756367  
gi-1092455566-gb-MAMS01000020.1-:2755399-2756367 Bemisia tabaci isolate MEAM1 Scaffold14,  
whole genome shotgun sequence 969 bp

TACGAGGTCTGTTAGATTAGAAACCGGATTTTGGTCATAACTACCCACAATGCGTCCAA  
ATTACGTTTTCTTGAGCTCTTCTGATAGCTGGAAATATACTTAAGAACGCTACGTTACA  
GATTTTGTTTAGTTTGATCAGTGTTTATTCTGTGTCATCTTGAATACGAGTAAGTCAGGT  
GCGTTTTGCGATTTTCATCATGCGATCACTGATAGAACAAAGATTCAACATTGAATTTTG  
TTTTAAACTCGGTATACCTTGTACCAAACTTTTGGTATACGCTAAGTAAAGTTTACCAT  
GATCATTGTATGGGATGTTCCCACTGTTTTGAATGAGTTAAACGATTCAAACTGGTCAG  
GAGTTTGTCAAAGATGAGGAGCATGGGAATCGACCCTCAACGGCAACTGACATTTGTCAC  
GTGGAAGAAATGCGGGCAAAAGTGCTCGAAAACGGTCGTTTCGAGCTTGTTGAACAGAGT  
AATATTTCTGAAGGCTCTGTACATACAATTTTGATAGAATATGTAGACACGCATCGAGTT  
TCAGGTACACTTGCCCCTTGATTGTTGTCCGTTGAACGAAAATCAAACCAAATGTCAATT  
TCCCTTTAGCTGCTTGAACGTTCTAACAGTGATCCTACATTTTTGGATAGGATAATTTTC  
GGTGACAATATTTTAGTGACGGCTACGATATGAAGACAAAACCTCCAATCGTCCTTGTTG  
GTTGAAAAATGTAGTGCAAGACCGAAAAAAGAGAGACAAGTTCGGTGAAACATAAAAAATC  
GCAAAACACCCCTTGAGGTTGCCTTACTTCAAGCCACATACCAACGAAGCTCTTTAAGATT  
TTTCAAACCTTATGAACGTAGCGTTCTTAAGTATATTTCCAGCTATCAGAAAAGCTCAAGA  
AAACGTAATTTGGACGCATTGTGGGTTAGTTATGACCAAAATCCGGTTTCTAATCTAACA  
GACCTCGTA

--

>Btmar1.8.24\_gi-1092447144-gb-MAMS01003641\_1-:341004-341980  
gi-1092447144-gb-MAMS01003641.1-:341004-341980 Bemisia tabaci isolate MEAM1 Scaffold2288,  
whole genome shotgun sequence 977 bp

TACGAGGTCTGTTAGATTAGAAACCGGATTTTGGTCATAACTAGCCCACAATGCGTCCGA  
ATTAGGTTTTCTTGAGCTTTCCTGATAGCTGGACATATACTTAAGAACGCTACGTTACA  
GATTTTGTTTATTCTGATCAGTGTTTATTCTGTGTCATCTTGAATACGAGTAAGTCAGGT  
GCGTTTTGCGATTTTCATCATGCGATCACTGATAGAGCAAAGATTCAACATTAAAGTTTG  
TTTTAAACTCGGTATACCTTGTACCGAACTTTTGGTATATGCTAAGTAAAGTTTACCAT  
GATCATTGTATGAGATGTTCCCACTGTTTTGAATGGGTAAACGATTGAAACTGGTCAG  
GAGTTCGTCAAAGATGAGGAGCATGGGAATCGACCCTCAACGGCAACTGACATTTGTCAC  
GTGGAAAAAAGTGCGGGCAATAGTGCTCGAAAATGGTCGTTTCGAGCTTATTGAACAGAG  
TAATATTTCTGAAGGCTCTGTACATACAATTTTGATAGAATATGTAGACACGCATCGAGA  
ATCAGGTACACTTGCCCCATGATTGTTGTCCGTTGAACGAAAATCCAACCAAATGTCAAT  
TTCCCTTTAGCTCCTTGAACGTTCTAACTATGATCCTACATTTTTGGATTGGATAATTTT  
CGGTGACAATACTTTAGTGACAGCTACGATACACGTATGGAGACGAAACTCCAATCGTC  
CTTGTGGGTTGAAAATTGTAGTGCAAGACCGAAAAAAGAGAGACGAGTTCGGTCAAACAT  
AAAAATCGCAAAACACCCTTGAGGTTACCTTACTTCAAGCCACATACCAACGAAGCTAAT  
TAGGATTTTTCAAATTTGTGAACGTAGCGTTCTTAAATATATTTTCACCTATCAGAAAA  
GCTCAAGAAAACGTAATTTGGACGCATTGTGGGCTAGTTATGACCAAACCTCCGTTTCTA  
ATCTAACAGACCTCGTA

--

>Btmar1.8.25\_gi-1092440704-gb-MAMS01006626\_1-:607144-608113  
gi-1092440704-gb-MAMS01006626.1-:607144-608113 Bemisia tabaci isolate MEAM1 Scaffold3536,  
whole genome shotgun sequence 970 bp

ATACGAGGTCTGTTAGATTAGAAACCGGATTTTGGTCATAACTACCCACAATGCGTCCA  
AATTACGTTTTCTTGAGCTCTTTGATAGCTGGAAATATACTTAAGAACGCTACGTTAC  
AGATTTTGTTTATTTGATCAGTGTTTATTCTGTGTCATCTTGAATACGAATAAGTCAGG  
TGCGTTTTGCGATTTTCATCATGCGATCACTGATAGAACAAAGATTCAACATTGAATTTT  
GTTTTAAACTCGGTATACCTTGTACCAAACTTTTGGTATACGCTAAGTAAAGTTTACCA  
TGATCATTGTATGGGATGTTCCCACTGTTTTGAATGAGTTAAACGATTCAAACTGGTCA  
GGAGTTTGTCAAAGATGAGGAGCATGGGAATCGACCCTCAACGGCAACTGACATTTGTCA  
CGTGGAAGAAATGCGGGCAAAAGTGCTCGAAAACGGTCGTTTCGAGCTTGTTGAACAGAG  
TAATATTTCTGAAGGCTCTGTACATACAATTTTGATAGAATATGTAGACAAGCATCGAGT

TTCGGGTACACTTGCCCCTTGATTGTTGTCCGTTGAACGAAAATCCAACCAAATGTCAAT  
TTCCCTTTAGCTGCTTGAACGTTCTAACAGTGATCCTACATTTTTGGATAGGATAATTTT  
CGGTGACAATATTTTAGTGTACGGCTACGATATGGAGACAAAACCTCCAATCGTCCTTATG  
GGTTGAAAAATGTAGTGCAAGACCGAAAAAAGAGAGACAAGTTCGGTGAAACATAAAAAAT  
CGCAAAACACCCCTTGAGGTTGCCTTACTTCAAGCCACATACCAACGAAGCTCATTAGGAT  
TTTTCAAACCTATGAACGTAGCGTTCTTAAGTATATTTCCAGCTATCAGAAAAGCTCAAG  
AAACGTAATTTGGACGCATTGTGGGCTAGTTATGACCAAATCCGGTTTCTAATCTAAC  
AGACCTCGTA

>Btmar1.8.26\_gi-1092455599-gb-MAMS01000015\_1-:1893936-1894903  
gi-1092455599-gb-MAMS01000015.1-:1893936-1894903 Bemisia tabaci isolate MEAM1 Scaffold130,  
whole genome shotgun sequence 968 bp

ATACGAGGTCTGTTAGATTAGAAACCGGATTTTGGTCATAACTAGCTCACAATGCGTTTCG  
AATTAGGTTTTCTTGAGCTTTTATGATAGCTGGAAATATACTTAAGAACGCTACGTTAC  
AGATTTTGTATTTTATGATCAGTGTTTATTCTGTGTCATCTTGAATACAAGTAAGTCAGG  
TGCGTTTTGCGATTTTCAGCATGCGAGCACTGATAGAGCAAAGACTCAACATTTAATTTT  
GTTTTAAACTCGGTACACCTGTACCGAACTTTTGGTATGCTAAGTAAAGTTTACCAAG  
ATCATTGTATGAGATGTTCCCTCTGTTTTGAGTGGGTAAACGATTCAAACTGGTCAGG  
AGTTCGTCGAAGATGAGGAGTATGGGAATCTACCCTCAACGGCAACTGACATTTGTCACG  
TGGAAGAAGTGCGGGCAAAAGTGCTCGAAAATGGTCGTTTCGAGCTTGTTGAACAGAGTA  
ATATTTCTGAAGGCTATGTGCATACAATTTTGATAGAATATGTAGACACGCATCGAGTTT  
CAGGTACACTTGCCCCTTGATTGTTGTCCGTTGAACGAAAATCCAACCAAATGTCAATTT  
CCCTTTAGCTGCTTGAACGTTCTAACAAATGATCCTACATTTTTGGAAAGGATAATTTTCT  
GTGACAATACTTTAGTGTACGGCTACGATATGGAGACGAAAACCTCCAATCGTCCTTGTGGG  
TTGAAAAATGTAGTGCAAGACCGAAAAAAGAGAGACAAGTTCGGTCAAACATAAAAAATCG  
CAAAACACCCCTTGAGGTTGCCTTACTTCAAGCCACATACCAACAAAGTTAATTATGATTT  
TTCAAATTTGTGAACGTAGCGTTCTTAAATATATTTTCAGCTATCAGAAAAGCTCAAGAA  
AACGTAATTCGGACGCATTGTGGGCTAGTTATGACCAAATCCGGTTTCTAATCTAACAG  
ACCTCGTA

--

>Btmar1.8.27\_gi-1092454766-gb-MAMS01000216\_1-:575873-576846  
gi-1092454766-gb-MAMS01000216.1-:575873-576846 Bemisia tabaci isolate MEAM1 Scaffold659, whole  
genome shotgun sequence 974 bp

ATACGAGGTCTGTTAGATTAGAAACCGGATTTTGGTCATAACTAGCCCACAATGCGTCCG  
AATTAGGTTTTCTTGAGCTTTTCTGATAGCTGAAAATATACTTAAGAACGCTACGTTAC  
AGATTTTGTTTATTCTGATTAGTGTATTCTGTGTCATCTTGAATACGAGTAAGTCAGG  
TGCGTTTTGCGATTTTCATCATAAGATCACTGATAGAGCAAAGATTCAACATTAAATTAT  
GCTTTAAACTCGGTATACCTCATACCGAACTTTTGGTATATGCTAAGTAAATGTTTACT  
ATGATCATTGTATGAGATGTTTCCACTGTTTTGAATGGGTAAACGATTCAAACTGGTC  
AGGAGTTCGTCAAAGATGAGGAGCATGGGAATCGACCCTCAACGGCAACTGACATTTGTC  
ACGTGGAAGAAGTGCGGGCAAAAGTGCTCGAAAATGGTCGTTTCGAGCTTGTTGAACAGA  
GTAATATTTCTGAAGGCTCTATGGACATACAATTTTGATAGAATATGTAGACACGCATCG  
AGTTTCAGGTACACTTGCCCCTTGATCGTTGTCCGTTGAACGAAAATCCAACCAAATGTC  
AATTTCCCTTTAGCTGCTTGAACGTTCTAACAATGATCCTACATTTTTGGATAGGATAAT  
TTTCGATGACAATACTTTAGTGTACGGCTACGATATATGGAGACAAAACCTCCAATCGTCC  
TTGTGGGTTGAAAAATGTAGTGCAAGACCGAAAAAAGAGACAAGTTCGGTCAAACATAA  
AAATCGCAAAACATTCTTGAGGTTGCCTTACTTCAAGCCACATACCAACGAAGCTGATTT  
GGCTTTTTCAAATTTTGAACGTAGCGTTCTTAAATATATTTTCAGCTATCAGAAAAGCT  
CAAGAAAACGTAATTTGGACGCATTGTGGGGTAGTTATGACCAAAATCCGGTTTCTAATC  
TAACAGACCTCGTA

--

>Btmar1.8.28\_gi-1092441631-gb-MAMS01006240\_1-:26789-27758  
gi-1092441631-gb-MAMS01006240.1-:26789-27758 Bemisia tabaci isolate MEAM1 Scaffold33694, whole  
genome shotgun sequence 970 bp

TACGAGGTCTGTTAGATTAGAAACCGGATTTTGGTCATAACTAGCCCACAATGCGTCCGA  
ATTAGGTTTTCTTGAGCTTTTCTGATAGCTGGAAATATACTTAAGAACGCTACGTTAC  
AGATTTTGTTTATTCTGATCAGTGTATTCTGTGTCATCTTGAATACGAGTAAGTCAGG  
TGCGTTTTGCGATTTTCATCATACGATCACTGATAGAGCAAAGATTCAACATTAAATTAT  
GCTTTAAACTCGGTATACCTTATACCGAACTTTTGGTATATGCTAAGTAAATGTTTACT  
ATGATCATTGTATGAGATGTTTCCACTGTTTTGAATGGGTAAACGATTCAAACTGGTC

AGGAGTTCGTCAAAGATGAGGAGCATGGGAATCGACCCTCAACGGCAACTGACATTTGTC  
ACGTGAAAGAAGTTCGGGCAAAAAAGCTCGGAAATGGTCGTTTCGAGCTTGTTGAACAGA  
GTCTAATTTCTGAAGGTTCTGTACATACAATTTTGATAGAATATGTAGACACGCATCGAG  
TTTCAGGTACATTTGCCCCTTGATTGTTGTCCGTTGAACGAAAATCCAACCAAATGTCAA  
TTCCCTCTAGCTGCTTGAACGTTCTAACAATGATCCTACATTTTTGGATAGGATAATTT  
TCGGTGACAATACTTTAGTGTACGGCTACGATATGGAGACGAAACTCCAATCGTCCTTGT  
GGGTTGAAAAATGTAGTGCAAGACCGAAAAAAGAGACAAGTTCGGTCAAACATAAAAAAT  
CGCAAAACACCCCTTGAGGTTGCCTTACTTCAAGCCACATACCAACGAAGCTGATTAGGAT  
TTTTCAAATTTGTGAACGTAGCGTTCTTAAATATATTTTCAGCTATCAGAAAAGCTCAAG  
AAAACGTAATTTGGACGCAATGTGGGCTAGTTATGACCAAATCCGGTTTCTAATCTAAC  
AGACCTCGTA

--

>Btmar1.8.29\_gi-1092454277-gb-MAMS01000420\_1-:636724-637693  
gi-1092454277-gb-MAMS01000420.1-:636724-637693 Bemisia tabaci isolate MEAM1 Scaffold1063,  
whole genome shotgun sequence 970 bp

ATACGATGTCTGTTAGATTAGAAACCGGATTTTGGTCATAACTAGCCCACAATGCGTCCG  
AATTAAGTTTTCTTGAGCTTTCCTGATAGCTGGAAATATACTTAAGAACGCTACGTTAC  
AGATTTTGTTTATTCTGATTAGTGTATTCTGTGTCATCTTGAATACGAGTAAGTCAGG  
TGCGTTTTGCGATTTTAATCATACGATCACTGATAGAGCAAAGATTCAGCATTAAATTAT  
GCTTTAAACTCGGTATACCTTATACCGAAACTTTTGGTATATGCTAAGTAAAGTTTACTA  
TGATCATTGTATGAGATGTTTCCACTGTTTTGAATGGGTAAACGATTCAAACTGGACA  
GGAGTTCGTCAAAGATGAGGAGCATGGGAATCGACCCTCAACGGCAACTGACATTTGTCA  
CGTGAAAGAAGTTCGGGCAAAAAAGCTCGGAAATGGTCGTTTCGAGCTTGTTGAACAGAG  
TCTTCTTTCTGAAGGTTCTGTACATACAATTTTGATAGAATATGTAGACACGCATCGAGT  
TTCAGGTACATTTGCCCCTTGATTGTTGTCCGTTGAACGAAAATCCAACCAAATGTCAAT  
TTCCCTTTAGCTGCTTGAACATTCTAACAATGATCCTACATTTTTGGATAGGATAATTTT  
CGGTGACAATACTTTAGTGTACGGCTACGATATGGAGAAGAACTTCAATCGTTCCTGTG  
GGTTGAAAAATGTAGTGCAAGACCGAAAAAGAGAGAGACAAGTTCGGTCAAACATAAAAAAT  
CGCAAAACACCCCTTGAGGTTGCCTTATTTCAAGCCACATACCAACGAAGCTGATTTGGAT  
TTTTCAAATTTGTGAACGTAGCGTTCTTAAATATATTTTCAGCTATCAGAAAAGCTCAAG

AAAACGTAATTTGGACGCATTGTGGGCTAGTTATGACCAAATCCGGTTTCTAATCTAAC  
AGACCTCGTA

--

>Btmar1.8.30\_gi-1092454277-gb-MAMS01000420\_1-:1470729-1471697  
gi-1092454277-gb-MAMS01000420.1-:1470729-1471697 Bemisia tabaci isolate MEAM1 Scaffold1063,  
whole genome shotgun sequence 969 bp

ATACGAGGTCTGTTAGATTAGAAACCGGATTTTGGTCATAACTAGCTCACAATACGTTTCG  
AATTAGGTTTTCTTGAGCTTTCCTGATAGCTGAAAATATATTTAAGAACGCTACGCTCAC  
AGATTTTGTTATTTTGATCAGTGTTTATTCTGTGTCATCTTGAATACGAGTAAGTCAGG  
TGCGTTTTGCGATTTTCATAATGCGATCACTGATAGAGCAAAGATTCAACATTGAATTTT  
GTTTTAACTCTGTAAACCTTGACCCAACTTTTGGTGCATGCTAAGTAAAGTTTACCA  
TGATCATTGTATGAGATGTTCCCTCTGTTTTGAATGGGTAAACGATTCAAACTGGTCA  
GGAGTTCGTCAAAGATGAGGAGCATGGGAATCGACCCTCAACGGCAACTGACATTTGTCA  
CGTGGAAGAAGTGCGGGCAAAAGTGCTCGAAAATGGTCGTTTCGAGCTTGTTGAACAGAG  
TAATATTTCTGAAGGCTCTGCACATACAATTTTGATAGAATATGTAGACACGCATCGAGT  
TTCAAGTACACTTGCCCTTGATTGTTGTCCGTTGAACGAAAATCCAACCAATGTCAAT  
TTCCCTTTAGCTGCTTGAACGTTCTTGAATGATCCTACATTTTGGATAGGATAATTTTC  
GGTGACAATACTTTAGTGACGGCTACGATATGGAGACGAACTCCAATCGTCCTTGTGA  
GTTGAAAAATGTAGTGCAAGACCGAGAAAAGAGAGACAAGTACGGTCAAACATAAAAATC  
GCAAAACACCCTTGAGGTTGCCTTACTTTAAGCCACATACCAACGAAGCTAATTAGGATT  
TTTCAAATTTGTGAACGTAGCGTTCTTAAATATATTTTCAGCTATCAGAAAAGCTCAGGA  
AATCGTAATTTGGACGCAATGTGGGCTAGTTATGACCAAATCCGGTTTCTAATCTAACA  
AACCTCGTA

>Btmar1.8.31\_gi-1092428234-gb-MAMS01017304\_1-:57-1025  
gi-1092428234-gb-MAMS01017304.1-:57-1025 Bemisia tabaci isolate MEAM1 Scaffold82165, whole  
genome shotgun sequence 969 bp

TACGAGGTCTGTTAGATTAGAAACCGGATTTTGGTCATAACTAGCTCACAATGCATCCGA  
ATTAGGTTTTCATGAGTTTTCTGATAGCTGAAAATATACTTAAGAACGCTACGTTACA  
GATTTTGTTATTTTGATTAGTGTTTATTCTGTGTCATCTTGAATACGAGTAAGTCAGGT



GCGTTTTGCGATTTTCATCATGCGATCACTGATAGAGCAAAGATTCAACATTAAATTTTG  
TTTTAAACTCGGTATACCTTGTACCGAACTTTTGGAATATGCTAAGTAAAGTTTACTAT  
GATCATTGTATGAGATGTTCCCACTGTTTTGAATAAGTTAAACGATTCAAACTGGTCAG  
GAGTTCGTCAAAGATGAGGAGCATGGGAATCGACCCTCAACAGAACTGACATTTGTCAC  
GTGAAAGAAGTTCGGGCAAAAAAGCTCGAAAATGGTCGTTTCGAGCTTGTGAACAGAGT  
AATATTTCTGAAGGCTCTGTACATACAATTTTGATAGAATATGTAGACACGCATCGAGTT  
CCAGGTACATTTGCCCCTTGATTGTTGTCCGTTGAACGAAAATCCAACCAAACGTCAATT  
TTCCTTTAGCTGCTTGAACGTTCTAACAATGTTCTACATTTTTGGATAGGATAATTTTC  
GGTGACAATACTTTAGAGTACGGCTACGATATGGAGACGAACTCCAATCGTCCTTGTGG  
GTTGAAAAATGTAGTGCAAGACCGAAAAAAGAGAGACAAGTTCGGTCAAACATAAAAAATC  
GCAAAACACCCTTGAGGTTGCCTTACTTCAAGCCACATACCAACGAAGCTGATTAGGATT  
TTTCAAATTTGTGAACGTAGCGTTCTTAAATATATTTTCAGCTATCAGAAAAGCTCAAGA  
AAACGTAATTTGGACGCATTGTGGGCTAGTTATGACCAAATCCGTTTTCTAATCTAACA  
GACCTCGTA

>Btmar1.8.32\_gi-1092430170-gb-MAMS01015368\_1-:2243053-2244021  
gi-1092430170-gb-MAMS01015368.1-:2243053-2244021 Bemisia tabaci isolate MEAM1 Scaffold735,  
whole genome shotgun sequence 969 bp

TACGAGGTCTGTTAGATTAGAAACCGGATTTTGGTCATAACTAGCCCACAATGCGTCCGA  
ATTAGGTTTTCTTGAGCTTTCCTGATAGCTGGAAATATACTTAAGAACGCTACGTTTACA  
GATTTTGTTTATTTTGATCAGTGTTTATTCTGTGTCATCTTGAATACGAGTAAGTCAGGT  
GCGTTTTGCGATTTTCATCATGCGATCACTGATAGAGCAAAGATTCAACATTAAATTTTG  
TTTTAAACTCGGTATACCTTGTACCGAACTTTTGGTATATGCTAAGTGAAGTTTACCAT  
GATCATTGTATGAGATGTTCTACTGTTTTGAATGGGTAAACGATTCAAACTGGTCAG  
GAGTTTGTCAAAGATGAGAAGCATGGGAATCGACCCTCAACGGCAACTGACATTTGTCAC  
GTGGAAGAAGTGCGGGCAAAAGTGCTCGAAAATGGTCGTTTCGAGCTTGTGAAAAGAGT  
AATATTTCTGAAGGCTCTTTACATACAATTTTGATAGAATATGTAGACACGCATCGAGTT  
TCAGGTACACTTGCCCCTTGATTGTTGTCCGTTGAACGAAAATCCAACCAAATGTCAATT  
TCCCTTCAGCTGCTTGAACGTTCTAACAATGATCCTACATTTTTGGATGGGATAATTTCC  
GGTGACAATACTTTAGTGACGGCTACGATATGGAGACGAACTCCAATCGTCCTTGTGG  
GTTGAAAAATGTAGTGCAAGACCAAAAAAAGAGAGACAAGTTCGGTCAAACATAAAAAATC

GCAAAACACCCTTGAGGTTGCCTTACTTCAAGCCACTTACCAACGAAGCTAATTAGGATT  
TTTCAAATTTGTGAACGTAGCGTTCTTAAGTATATTCCTAGCTATCAGAAAAGCTCAAGA  
AAACGTAATTTGGACGCATTGTGGGCTAGTTATGACCAAATCCGGTTTCTAATCTAACA  
GACCTCGTA

--

>Btmar1.8.33\_gi-1092454833-gb-MAMS01000205\_1-:1655752-1656719  
gi-1092454833-gb-MAMS01000205.1-:1655752-1656719 Bemisia tabaci isolate MEAM1 Scaffold641,  
whole genome shotgun sequence 968 bp

TACGAGGTCTGTTAGATTAGAAACCGGATTTTGGTCATAACTAGCCCACAATGCGTCCGA  
ATTAGGTTTTCTTGAGCTTTCCTGATAGCTGAAAATATACTTAAGAACGCTACGTTACA  
GATTTTATTTATTTTGATCTGTGTTTATTCTGTGTCATCTTGAATACGAGTAAGTCAGGT  
GCGTTTTGCGATTTTCATCATGCCATCACTGATAGAGCAAAGATTCAACACTAAATTTTG  
TTTTAACTCGGTATATCTTGTACCGAACTTTTGGTATATGCTAAGTAAAGTTTACCAT  
GATCATTGTATGAGATGTTCCCACTGTTTTCAATGGGTAAACGATTCAAACTGGTCAG  
GAGTTCGTCAAAGATGAGGAGCATGGGAATTGACCCTCAACGGCAACTGACATTTGTCAC  
GTGGAAGAAGTGCGGGCAAAAGTGCTCGAAAATGGTCGTTTCGAGCTTGTTGAACAGAGT  
AATATTTCTGAAGGCTCTGTACATACAATTTTGATAGAATATGTAGACACGCATCGAGTT  
TCAGGTACGCTTGCCCCTTGATTGTTGTCCGTTGAACGAAAATCCAACCAAATGTCAATT  
TCCCTTAGCTGCTTAAACGTTCTAACAATGATCCTACATTTTGGATAGGATAATTTTC  
GGTGACAATACTGTAGTGTATGGCTACGATATGAGACGAACTCCAATCGTCCTTGTGGG  
TTGAAAAATGTAGTGCAAGACCGAAAAAGAGAGACAAGTTCGGTCAAACATAAAAAATCG  
CAAAACACCCTTGAGGTTGCCTTACTTCAAGCCACATACCAACGAAGCTAATTAGGATTT  
TTCAAATTTGTGAACGTAGCGTTCTTAAATATATTTTGTAGCTATCAGAAAAGCTCAAAAA  
AACCTAATTTGGACGCATTGTGGGCTAGTTATGACTAAAATCCGGTTTCTAATCTAACAG  
ACCTCGTA

>Btmar1.8.34\_gi-1092443497-gb-MAMS01005456\_1-:2625290-2626259  
gi-1092443497-gb-MAMS01005456.1-:2625290-2626259 Bemisia tabaci isolate MEAM1 Scaffold3040,  
whole genome shotgun sequence 970 bp

ATACGGGGTCTGTTAGAAAGAAACCGGATTTTGGTCATAAGTAGCCCAAATGCGTCCG  
AATCAGGTTTTCTTGAGCTTCCCTGATAGCTGGAAATATACTTAAGAACGCTACGTTAC

AGATTTTGTATTTTATTTGATCAATGTTTATTCTGTGTCATCTTGAATACGAGTAAGTCAGG  
TGCGTTTTGCGATTTTCAGCATGCGATCACTGATAGAGCAAAGACTCAACATTTAATTTT  
GTTTTAAACTCGGTATACCTTGTGCCGAACTTTTGGTATATGCCAAGTGAAGTTTACCA  
TGATCATTGTATGAGATGTTCCCACTGTTTTGAATGGGTAAACGATTCAAACTGGTCA  
GGAGTTCGTCAAAGATGAGGAGCATGGGAATCGACCCTCAACGGCAACTGACATTTGTCA  
AGTGGAAGAAGTGCGGGCAAAAGTGCTCGAAAATGGTCGTTTCGAGCTTGTTGAACAGAG  
TAATATTTCTGAAGGCTCTGTACATACAATTTTGATAGAATATGTAGACACGCATCGAGT  
TTCAGGTACACTTGCCCTTGATTGTTGTCCGTTGAACGAAAATCCAACCAAATGTCAAT  
TTCCTTTAGCTGCTTGAAAGTTCTAACAATGATCCTACATTTTGGATAGGATAATTTT  
CGGTGACAATACTTTAGTGTACGGCTACGATATGGAGACGAACTCCAATCGTCCTTGTG  
GATTGAAAAATGTAGTGCAAGACCGAAAAAGAGAGACAAGTTCGGTCAAACATAAAAAAT  
CGCAAAACACCTTGAGGTTGCCTTACTTCAAGCCACATACCAACGAAGCTAATTAGGAT  
TTTTCAAATTTGTGAACGTAGCGTTCTTAAATATATTTTCAGCTATCAGAAAAGCTCAAG  
AAAACGTAATTTGGACGCATTGTGGGCTAGTGATGACCAAATCCGGTTTCTAATCTAAC  
AGACCTCGTA

--

>Btmar1.8.35\_gi-1092425897-gb-MAMS01019641\_1-:6116775-6117746  
gi-1092425897-gb-MAMS01019641.1-:6116775-6117746 Bemisia tabaci isolate MEAM1 Scaffold959,  
whole genome shotgun sequence 972 bp

ATACGAGGTCTGTTAGATTAGAAACCGGATTTTGGTCATAACTAGCCCGCAATGCGTTTCG  
AATTAGGTTTTCTTGAGCTTTTCTGATAGCTGGAAATATACTTAAGAACGCTACGTTAC  
AGATTTTGTATTTTATTTGATCAGTGTTCACTTCTGTGTCATCTTGAATACGAGTAAGTCAGG  
TGCGTTTTGCGATTTTCATCATGCGATCACTGATAGAGCAAATATTCAACATTAATTTT  
GTTTTAAACTCGGTACACCTGTACCGAACTTTTGGTATATGCTAAGTAAAGTTTATCA  
TGATCATTGCATGAGATGTTCCCACTGTTTTAATGGGTCAAACGATTCAAACTAGTCA  
GGAGTTCGTCAAAGATGAGGAGCATGGGAATCGACCCTCAACGGCAACTGACATTTGTCA  
CGTGGAAGAAGTGCGGGCAAAAGAGCTCGAAAATGGTCGTTTCGAGCTTGTTGAACAGAG  
TAATATTTCTGAAGGCTCTGTACATACAATTTTGATAGAATATATAGACACGCATCGAGT  
TTCGGGTACACTTGCCCTTGATTGTTGTCCGTTGAACGAAAATCCAACCAAATGTCATT  
TTCCTTTAGCTGCTTGAAAGTTCTAACAATGATTCTACATTTTGGATAGGATAATTTT

CGGTGAAAATACTGTAGTGACGGCTACGATATGGGGACGAACTCCAATCGTCCTTGTG  
GGTTGAAAAATGTAGTGTAAGACCGAAAAAAGGGAGACAAGTTCGGTCAAACATAAAAAAT  
CGCAAAACACCCCTTGAGGTTGCCTTACTTCAAGCCACATACCAACGAAGCTAATTAGGAT  
TTTTCAAATTTGTGAACGTAGCGTTCTTAAACATATTTTCAGCTATCAGAAAAGCTCAAG  
AAATTTTGTAATTTGGACGCATTGTGGGCTAGTTATGACCAAAATCCGGTTTCTAATCTA  
ACAGACCTCGTA

--

>Btmar1.8.36\_gi-1092425791-gb-MAMS01019747\_1-:8668-9632  
gi-1092425791-gb-MAMS01019747.1-:8668-9632 Bemisia tabaci isolate MEAM1 Scaffold370000, whole  
genome shotgun sequence 965 bp

TACGAGGTCTGTTAGATTAGAAACCGGATTTTGGTCATAACTAGCTTACTGTGCGTCCGA  
ATTAGATTTTCTAAGACTTTTCTGATAGCTGATAACATATCAAAGAACGCTACGTTACA  
GATTTTGTTTATTTTGATCAGTGTTTATTCTGTGTCATCTTGAATACGAGGAAGTCAGGT  
GCGTTTTGCGATTTTCATCATACGATCACTGACAGAGCAAAGATTTAACATTACATTTG  
TTTTAAGCTCGGTATACCTTGTAACCGAACTTTTGATATGCTAAGTAAAGTTTACCAAGA  
TCATTATATGAGTTGTTCTCACTATTTTGAGTGGGTAAACGATTCAAACTGGTCAGGA  
GTTTCGTCAAAGATGAGGAGCATGGGAATCGACCATCAACGGCAACTAACATTTGTCACGT  
GGAAGAAGTGCGGGCAAAAGTCTCGAAAATGGTCGTTTCGAGCTTGCTGAACAGTGTAAT  
ATTTCTGAAGGCTCTGTATATACAATTTTGATAGAATATGTAGACATGCATCGAGTTTCA  
GGTACACTTGCCCCCTTGATTGTTGTCCGTTGAACAAAATTCAACCAAATGTTAATTTCCC  
TGTAGCTGCTTGAACGTTCTAACCATGATCCTACATTTTGGATAGGATAATTTTCGATG  
ATAATACTTGAGTGACGGCTAAGATACGGAGACGAACTCCAATCATCCTTGTGTATTG  
AAAAATGTAGTGCAAGACCGAAAAAAGAGAGACAAGTTCGGTCAAACATAAAAAATCGCAA  
AACATCCATGAGGTTGCCGTACTTGAAGCCACATACCAACGAAGCAAATTAAGATTTTTC  
AAATCTGTGAACGTGGCGTTCTTAAGTATATTTTCAGCTATCAGAAAAAATCAAGAAAAC  
TTAATTTGACGCACAGTAGGCTAGTTATGACCAAAATCCGGTTTCTAATCTAACAGACC  
TCGTA

>Btmar1.8.37\_gi-1092455005-gb-MAMS01000156\_1-:661291-662259

gi-1092455005-gb-MAMS01000156.1-:661291-662259 Bemisia tabaci isolate MEAM1 Scaffold506, whole genome shotgun sequence 969 bp

ATACGAGGTCTGTTAGATTAGAAACCGGATTTTGGTCATAACTAGCCCACAATGCGTTTCG  
AATTAGGTTTTCTTGAGCTTTCCTGATAGCTGGAAATATACTTAAGAACGCTACGTTTAC  
AGATTTTGTTATTTTGATCAGTGTTTATTCTGTGTCATCTTGAATACGAGTAAGTCAGG  
TGCGTTTTGCGATTTTCATCATGCGATCACTGATAGAGCAAAGATTCAACATTAAATTTT  
GTTTTAACTCGGTATACCTTGTAACGAACTTTTGGTATATGCTAAGTAAAGTTTACCA  
TGATCATTGTATGGATGTTCTCACTGTTTTGAATGGGTAAACGATTCAAACTGGTCAG  
GAGTTCGTCAAAGATGAGGAGCATGGGAATCGACCCTCAACGGCACCTGACATTTGTCAC  
GTGGAAGAAGTGCGGGCAAAAGTGCTCGAAAATGGTCGTTTCGAGCTTGTTGAACAGAGT  
AATATTTCTGAAGACTCTGTACATACAATTTTGATAGAATATGTATACACGCATCGAGTT  
TCAGGTACACTCGCCCCTTGATTGTTTTCCATTGAACGAAAATCCAACAAAATGTCAATT  
TCCCTGTAGCTGCTGAACGTTCTAACAATGATCCTACATTTTGGATTTGATAATTTT  
GGTGACAATACTTTAGTGTAACGGCTACGATATGGAGACGAACTCCAATCGTCCTTGTTGG  
GTAGAAAAATGTAGTGCAAGACCGAAAAAAGAGAGAAAAGTTCGGTCAAACATAAAAAATC  
GCAAAACACCCTTGGGGTTGCCTTACTTCAAGCCCCATACCAACGAAGCTAATTAGGATT  
TTTCAAATTTGTGAACGTAGCGTTCTTAAATATATTTTCAGCTATCAGAAAAGCTCAAGA  
AAACGTAATTTGGACGCATTGTGGGCTAGTTATGACCAAAATCCGGTTTCTAATCTAACA  
GACCTCGTA

--

>Btmar1.8.38\_gi-1092445999-gb-MAMS01004090\_1-:1351608-1352576

gi-1092445999-gb-MAMS01004090.1-:1351608-1352576 Bemisia tabaci isolate MEAM1 Scaffold2478, whole genome shotgun sequence 969 bp

TACGAGGTCTGTTAGATTAGAAACCGGATTTTGGTCATAACTAGCCCACAATGCGTCCAA  
ATTACGTTTTCTTGAGCTTTTCTGATAGCTGGAAATATACTTAAGAACGCTACGTTTACA  
GATTTTGTTATTTTGATCAGTGTTTATTCTGTGTTATCTTGAATACGAGTAAGTCAGGT  
GCGTTTTGCGATTTTCATCATGCGATCACTGATAGAACAAAGATTAAACATTAAATTTTG  
TTTTAACTCGGTATACCTTGTAACAAAACCTTTTGGTATACGCTAAGTAAAGTTTACCAT  
GATCATTGTATGAGATGTTCCCACTGTTTTGAATGAGTTAAACGATTGAACTGGTCAG

GAGTTCGTCAAAGATGAGGAGCATGGGAATCGACCCTCAACGGCAACTGACATTTGTCAG  
GTGGAAGAAATGCGGGCAAAAGTGCTCGAAAACGGTCGTTTCGAGCTTGTTGAACAGAGT  
AATATTTCTGAAGGCTCTGTACATACAATTTTGATAGAATATGTAGACACGCATCGAGTT  
TCAGGTACACTTGCCCCTTGATTGTTGTCCGTTGAACGAAAATCCAACCAAATGTCAATT  
TCCCTTTAGCTGCTTGAACGCTCTAACAGAGATCCTACATTTTTGGATAGGATAATTTTC  
GGTGACAATATTTTAGTGACGGCTACGATATGGAGACAAAACCTCCAATCGTCCTTGTGG  
GTTGAAAAATGTAGTGCAAGACCGAAAAAAGAGAGACAAGTTCGGTGAAACATAAAAAATC  
GCAAAACACCCTTGAGGTTGCCTTACTTCAAGCCACATACCAACGAAGCTCATTAGGATT  
TTTCAAACCTTGTAACGTAGCGTTCTTAAGTATATTTCCAGTTATCAGAAAAGCTCAAGA  
AAACGTAATTTGGACGCATTGTGGGCTAGTTATGACCAAAATCCGGTTTCTAATCTAACA  
GACCTCGTA

--

>Btmar1.8.39\_gi-1092436347-gb-MAMS01009191\_1-:191877-192849  
gi-1092436347-gb-MAMS01009191.1-:191877-192849 Bemisia tabaci isolate MEAM1 Scaffold4625,  
whole genome shotgun sequence 973 bp

TACGAGGTCTGTTAGATTAGAAACCGGATTTTGGTCATAACTAGCCCACAATGCGTCCGA  
ATTAGGTTTTCTTGAGCTTTCCTGATAGCTGGAAATGTACTGAAGAACGCTACGTTCA  
GATTTTGTTTATTTTGATCAGTGTTTATTCTGTGTCATCTTGAATACGAGTATGTCAGGT  
GCGTTTTGCGATTTTCATCATGCGATCACTGATAGTGCAAAGATTCAACATTAAATTTTG  
TTTTAAGCTCGGTATACCTTGTAACCGAACTTTTGGTATATGCTTAGTTAAAATTACCAT  
GATCATTGTATGAGATGTTCCCACTGTTTTGAATGGGTAAACGATTCAAACTGGTCAG  
GAGTTCGTCAAAGATGAGGAGCATGGGAATCGACCCTCAACGGCAACTGACATTTGTCAC  
GTGGAAGAAGTGCGGGCAGAAAGTGCTCGAAAATGGTCGTTTCAAGCTTGTTGAACAGAGT  
AATATTTCTGAAGGCTCTGTACATACAATTTTGATAGAATATGTAGACACGTATCGAGTT  
TCATGTACACTTGCTCCTTGATTGTTGTCCGTTGAACGAAAATCCAACCAAATGTCAATT  
TCCCTTTAGCTGCTTGAACGTTCTATCGATGATCCTACATTTTTGGATAGGATAATTTTC  
GATTACAATACTTTAGTGACGGCTACGATATGGAGACGAACTCCAATCGTCCTTGTGG  
GTTGAAAAATTTAGTACGTGCAAGACCGAAAAAAGAGAGACAAGTTCGGTGAAACATAAA  
AATCGCAAAACACCCTTGAGGTTGCCTTACTTCAAGCCACATACCAACGAAGCTGATTAG

GATTTTTCAAATTTTGAATGTAGCGTCTTAAATATATTTTCAGCTATCAGAAAAGCTC  
AAGAAAACGTAATTTGGCCGCATTGTGGGCTAGTTATGACCAAATCCGGTTTCTAATCT  
AACAGACCTCGTA

>Btmar1.8.40\_gi-1092437641-gb-MAMS01008105\_1-:445981-446948  
gi-1092437641-gb-MAMS01008105.1-:445981-446948 Bemisia tabaci isolate MEAM1 Scaffold4137,  
whole genome shotgun sequence 968 bp

TACGAGGTCTGTTAGATTAGAAACCGGATTTTGGTCATAACTAGCCCACAATGCGTTCGA  
ATTAGGTTTTCTTGAGCTTTCCTGATAGCTGGAAATATACTTAAGAACGCTACGTTACA  
GATTTTGTTATTTTGATCAGTGTTTATTCTGTGTCATCTTGAATACGAGTAAGTCAGGT  
GCGTTTTGCGATTTTCATCATGCGATCACTGATAGAGCAAAGATTCAACATTAAATTTG  
TTTAAACTCGGTATACCTTGTACCGAACTTTTGGTATATGCTAAGTAAAGTTTACCAT  
GATCATTGTATGGATGTTCTCACTGTTTTGAATGGGTAAACGATTCAAACTGGTCAGA  
AGTTCGTCAAAGATGAGGAGCATGGAATCGACCTCAACGGCACCTGACATTTGTCACG  
TGGAAGAAGTGCGGGCAAAAGTGCTCGAAAATGGTCGTTTCGAGCTTGTTGAACAGAGTA  
ATATTTCTGAAGACTCTGTACATACAATTTTGATAGAATATGTATACACGCATCGAGTTT  
CAGGTACACTCGCCCCCTTGATTGTTTTCCATTGAACGAAAATCCAACAAAATGTCAATTT  
CCCTGTAGCTGCTTGAACGTTCTAACAATGATCCTACATTTTGGATTTGATAATTTTCG  
GTGACAATACTTTAGTGTACGGCTACGATATGGAGACGAACTCCAATCGTCCTTGTGGG  
TAGAAAAATGTAGTGCAAGACCGAAAAAGAGAGAAAAATTCCGGTCAAACATAAAAAATCG  
CAAACACCCTTGGGGTTGCCTTACTTCAAGCCCCATACCAACGAAGCTAATTAGGATTT  
TTCAAATTTGTGAACGTAGCGTTCTTAAATATATTTTCAGCTATCAGAAAAGCTCAAGAA  
AACGTAATTTGGACGCATTGTGGGCTAGTTATGACCAAATCCGGTTTCTAATCTAACAG  
ACCTCGTA

--

>Btmar1.8.41\_gi-1092450877-gb-MAMS01001951\_1-:5754006-5754976  
gi-1092450877-gb-MAMS01001951.1-:5754006-5754976 Bemisia tabaci isolate MEAM1 Scaffold16276,  
whole genome shotgun sequence 971 bp

ATACGAGGTCTGTTAGATTAGAAACCGGATTTTGGTCATAACTAGCCCACAATGCGTCCG  
AATTAGGTTTTCTTGAGCTTTCCTGATAGCTGAAAATATACTTAAGAACGCTACGTTAC

AGATTTTGTATTTTATTTGATCAGTGTTTATTCTATGTCATCTTGAATACGATTAAGTCAGG  
TGCGTTTTGCGATTTTCATCATGCGATCACTGATAGAGCAAAGATTCAACATTAAATTTT  
GTTTTAACTCGGTATACCTTGACCGAACTTTTGGTACATGCTAAGTAAAGTTTACCA  
TGATCATTGTATGAGATGTTCCCACTGTTTTGAATGGGTAAACGATTCAAACTGGTCA  
GGAGTTCGTCAAAGATGAGGAGCATGAGAATCGACCCTCAACGACAACTGACATTTGTCA  
CCTGGAAGAAGTGCAGGCAAAAGTGCTCGAAATTGGTTGTTTCGAGCTTGTTGAACAGAG  
TAATATTTTGAAGGCTCTACACATACAATTTTGATAGAATATGTAGACACGCATCGAGT  
TTCAGGTACACTTGCCCTTGATTGTTGTCCGTTGAACAAAATCCAACCAAATGTCATT  
TTCCCTTTAGCTGCTTGAACGTTTTAACAATGATCCTACATTTTTGGATAGGATAATTT  
TCGGTGACAATACTTTAGTGACGGCTACGATATGGAGACGAACTTCAATCGTCCTTGT  
GGGTTGAAAAATTTAGTGCAAGACCAAAAAAAGAGAGACAAGTTCGGTCCACCATAAAAA  
TCGCAAAACACCCTTGAGGTTGCCTTACTTCAAGCCACAAACCAACGAACCTAATTAGGA  
TTTTTCAAATTTGTGAACGTAGCGTTCTTACATATATTTTCAGCTATCAGAAAAGCTCAA  
GAAAACGTAATTTGGACGCATTGTGGGCTAATTATGACCAAATCCGTTTTCTAATCTAA  
CAGACCTCGTA

--

>Btmar1.8.42\_gi-1092428515-gb-MAMS01017023\_1-:1854225-1855194  
gi-1092428515-gb-MAMS01017023.1-:1854225-1855194 Bemisia tabaci isolate MEAM1 Scaffold809,  
whole genome shotgun sequence 970 bp

ATACGAGGTCTGTTAGATTAGAAACCGGATTTTGGTCATAACTAGCCCACAATGCGTTTCG  
AATTAGGTTTCCTTGAGCTTTTCTGATAGCTGGAAATATACTTAAGAACGCTACGTTAC  
AGATTTTGTATTTTATTTGATCAGTGTTAATCTGTGTCATCTTGAATACGAGTAAGTCAGG  
TCCGTTTTGCGATTTTCATCATGCGATCACTGACAGAGCAAATATTCAACATTAAATTTT  
GTTTTAACTCGGTACACCTTGACCGAACTTTTGGTATATGCTAAGTAAAGTTTACCA  
TGATCATTGCATGAGATGTTCCCACTGTTTTGAATGGGTAAACGATTCAAACTGGTCA  
GGAGTTCGTCAAAGATGAGGAGCATGGGAATCGACCCTCAACGGCAACTGACATTTGTCA  
CGTGGAAGAAGTGCGGGCAAAAGAGCTCGAAAATGGTCGTTTCGAGCTTGTTGAACAGAG  
TAATATTTTGAACACTCTGTACATACAATTTTGATAGAATATGTAGACACGCATCGAGT  
TTCAGGTACACTTGCCCTTGATTGTTGTCCGTTGAACGAAAATCCAACCAAATGTCATT  
TTCCCTTTAGCTGCTTGAACGTTCTAACGATGATCCTACATTTTTGGATAGGATAATTTT



CGGTGAAAATACTGTAGTGACGGCTACGATATGGGGACGAACTCCAATCGTCCTTGTG  
GGTTGAAAAATGTAGTGCAAGACCGAAAAAAGGGAGACAAGTTCGGGCAAACATAAAAAAT  
CGCAAAACACCCCTTGAGGTTGCCTTACTTCAAGCCACATACCAACGAAGCTAATTAGGAT  
TTTTCAAATTTGTGAACGTAACGTTCTTAAACATATTTTCAGCTATCAGAAAAGCTCAAG  
AAAACGTAATTTGGACGCATTGTGGGCTAGTTATGACCAAATCCGGTTTCTAATCTAAC  
AGACCTCGTA

--

>Btmar1.8.43\_gi-1092455371-gb-MAMS01000058\_1-:524248-525217  
gi-1092455371-gb-MAMS01000058.1-:524248-525217 Bemisia tabaci isolate MEAM1 Scaffold232, whole  
genome shotgun sequence 970 bp

ATACGAGGTCTGTTAGATTAGAAACCGGATTTTGGTCATAACTACCCCAATGCGTCCA  
AATTACGTTTTCTTGAGCTCTTCTGATAGCTGAAAATATACTTAAGAACGCTACGTTAC  
AGATTTTGTGTTAGTTTGATCAGTGTTTATTCTGTGTCATCTTGAATACGAGTAAGTCAGG  
TGCGTTTTCCGATTTTCATCATGCGATCACTGATAGAACAAAGATTCAACATTGAATTTT  
GTTTTAAACTCGGTATACCTGTACCAAACTTTTGGTATACGCTAAGTAAAGTTTACTA  
TGATCATTGTATGGGATGTTCCCACTGTTTTGAATGAGTTAAACGATTCAAACTGGTCA  
GGAGTTTGTCAAAGATGAGGAGCATGGGAATCGACCCTCAACGGCAACTGACATTTGTCA  
CGTGGAAGAAATGCGGGCAAAAGTGCTCGAAAACGGTCGTTTCGAGCTTGTTGAACAGAG  
TAATATTTCTGAAGGCTCTGTATATACAATTTTGATAGAATATGTAGACACGCATCGAGT  
TTCAGGTACACTTGCCCCTTGATTGTTGTCCGTTGAACGAAAATCAAACCAAATGTCAAT  
TTCCCTTTAGCTGCTTGAACGTTCTAACAGTGATCCTACATTTTTGGATAGGATAATTTT  
CGGTGACAAAATTTTAGTGACGGCTACGATATGGAGACAAAACCTCCAATCGTCCTTGTG  
GGTTGAAAAATGTAGTGCAAGACCGAAAAAAGAGAGACAAGTTCGGTGAAACTTAAAAAT  
CGCAAAACACCCCTTGAGGTTGCCTTACTTCAAGCCACATACCAACGAAGCTCTTTAAGAT  
TTTTCAAATTATGAACGTAGCGTTCTTAAGTATATTTCCAGCTATCAGAAAAGCTCAAG  
AAAACGTAATTTGGACGCATTGTGGGTTAGTTATGACCAAATCCGGTTTCTAATCTAAC  
AGACCTCGTA

--

>Btmar1.8.44\_gi-1092442353-gb-MAMS01005939\_1-:1337055-1338022  
gi-1092442353-gb-MAMS01005939.1-:1337055-1338022 Bemisia tabaci isolate MEAM1 Scaffold3236,  
whole genome shotgun sequence 968 bp

TACGAGGTCTGTTAGATTAGAAACCGGATTTTGGTCATAACTAGCCCACAATGCGTCCGA  
ATTAGGTTTTCTTGAGCTTTCCTGATAGCTGGAAATATACTCAAGAACGCTACGTTTACA  
GATTTTGTTTATTTTGATCAGTGTTTATTCTGTGTCATCTTGAATACGAGTAAGTCAGGT  
GCGTTTTGCGATTTTATCATGCGATCACTGACAGAGCAAAGATTCAACATTAAATTTTGT  
TTTAAACTCGGTATACCTTGTAACGAACTTTTGGTATATGCTAAGAAAAGTTTACCATG  
ATCATTGTATGAGATGTTCCCACTGTTTTGAATGGGTAAACGATTCAAACTGGTCAGG  
AGTTCGTCAAAGATGAGGAGCATGGGAATCGACCCTCAACGGCGACTGACATTTGTCACG  
TGGAAGAAGTGCGGGCAAAAGTGCTCGAAAATGGTTGTTTCGAGCTTGTTGAACTGAGTA  
ATATTTCTGAAGGCTCCGTACATACAATTTTGATAGAATATGTAGACACGCATCGAGTTT  
CAGGTACACTTGCCCTTGATTGTTGTCCGTTGAACGAAAATCCAACCAAATGTCTATTT  
ACCTTTAGCTGCTTAAACGTTCTAACACGATCCTACATTTTGGATGGGATAATTTTCG  
GTGACAATACTTTAGTGTACGGCTACGATATGGAGACGAACTCCAATCGTCCTTGTGGG  
TTGAAAAATGTAGTGCAAGACCGAAAAAAGAGAGACAAGTTCGGTCAAACATAAAAAATCG  
CAGAACACCTTGAGGTTGCCTTACTTCAAGTCACATACCAACGAAGCTAATTATGATTT  
TTCAAATTTGTGAACGAAGCGTTCTTAAATATATTTTCAGCTATTAGAAAAGCTCAAGAA  
AACGTAATTTGGACGCATTTTAGGCTAGTTATGACCAAAATCCGGTTTCTAATCTAACAG  
ACCTCGTA

--

>Btmar1.8.45\_gi-1092427769-gb-MAMS01017769\_1-:146448-147416  
gi-1092427769-gb-MAMS01017769.1-:146448-147416 Bemisia tabaci isolate MEAM1 Scaffold844, whole  
genome shotgun sequence 969 bp

TACGAGGTCTGTTAGATTAGAAACCGGATTTTGGCCATAACTAGCCCACAATGCGTCCGA  
ATTAGGTTTTCTTGAGCTTTCCTGATAGCTGGAAATATACTTAAGAACGCTACGTTTACA  
GATTTTGTTTATATTGATCAGTGTTTATTCTGTGTCATCTTGAATACGAGTAAGTCAGGT  
GCGTTTTGCGATTTTCATCATGCGATCACTGATAGAGCAAAAATTCAACATTAAATTTTG  
TTTGAACTTGGTATACCTTGTAACGAACTTTTGGTATATGCTAAGTAACGTTTACCAT

GATCATTGTATGAGATGTTCCCGCTGTTTTGAATGGGATAAACGATTCAAACCTGGCCAG  
GAGTTCGTCAAAGATGAGGAGCATGGGAATCGACCCTTAACGGCAACTGACATTTGTCAC  
GTGGAAGAAGTGCAGGCCAAAAGTGCTCGAAAATGGTCGTTTCGAGCTTGTTGAACAGAGT  
AATATCTCTGAAGGCTCTGTATATACAATTTTGATAGAATATGTAGACATGCATCGAGTT  
TCAGGTACACTCGCCCCTTGATTGTTGTCGATTGAACGAAAATCCAACCAAATGTCAATT  
TCCCTTTAGCTGCTTGAACGTTCTAACAATGATCCTACATTTTTGGATAGGATAATTTTC  
GGTGACAATACTTTAGTGACGGCTACGATATGGAGACGAAACTCCAATCGTCCTTGTGG  
GTTGAAAAATGTAGTGCAAGACCGAAAAAGAGAGACAAGTTCGGTCAAACATAAAAAATC  
GCAAAACACCCTTGAGGTTGCCTTACTTCAAGCCACATACCAACGAAGCTAATTAGGATT  
TTTCAAATTTGTGAACGTAGCGTTCTTAAATATATTTTCAGCTATCAGAAAAGCTCAAAA  
AAACGTAATTTGGACGCATAATGGGCTAGTTATGACCAAATCCGGTTTCTAATCTAACA  
GACCTCGTA

--

>Btmar1.8.46\_gi-1092435969-gb-MAMS01009569\_1-:1523684-1524652  
gi-1092435969-gb-MAMS01009569.1-:1523684-1524652 Bemisia tabaci isolate MEAM1 Scaffold479,  
whole genome shotgun sequence 969 bp

ATACGAGGTCTGTTAGATTAGAAACCGGATTTTGGTCATAACTAGCCATAATGCGTCTA  
AATTAGGTTTTTTTGGAGCTTTCCTGATAGCTGGAAATATACTTAAGAACGCTACGTTTAC  
AGATTTTGTATTTTATTTGATCAGTGTTTATTCTGTGTCATCTTGAATACAAGTAAGTCAGG  
TGCGTTTTGCGATTTTCATCATGCGATCACTGATAGAGCAAAGATTCAACATTAAATTTT  
GTTTTAACTCGGTATACCTGTACCGAACTTTTGGTATCCGCTAAGTAAAGTTTACCA  
TGATCATTGTATGAGATGTTCCCACTGTTTTGAATGAGTTAAACGATTCAAACCTGGTCA  
GGAGTTCGTCAAAGATGAGGAGCATGGGAATCGACCCTCAACGGCAACTGACATTTGTCA  
CGTGGAAGAAATGCGGGCAAAAAGTGTTTCGAAAACGGTCGTTTCGAGCTTGTTGAACAGAG  
TAATATTTCTGAAGGCTCTGTACATACAATTTTGATAGAATATGTAGACACGCATTGAGT  
TTCAGGTACACTTGCCCCTTGATTGTTGTCCGTTGAACGAAAATCCAACCACATGTCAAT  
TTCCCTTTAGCTGCTTGAACGTTCTAACAATGATCCTACATTTTTGGATAGGATAATTTT  
CGGTGACAATACTTTAGTGTAAGGCTACGATATGGAGACGAAACTCCAATCTCCTTGTGG  
GTTGAAAAATGTAGTGCAAGACCGAGAAAAAGAGAGACAAGTTCGGTGAAACATAAAAAATC  
GCAAAACACCCTTGAGGTTGCCTTACTTCAAGCCACATACCAACGAAGCTAATTAGGATT

TTTCAAACCTTGTGAACGTAGCGTTTTTAAGTATATTTCCAGCTATCAGAAAAGCTCAAGA  
AAACGTAATTTGGACGCATTTTGGGCTAGTTATGACCAAAATCCGGTTTCTAATCTAACA  
GACCTCGTA

>Btmar1.8.47\_gi-1092455019-gb-MAMS01000152\_1-:1277608-1278579  
gi-1092455019-gb-MAMS01000152.1-:1277608-1278579 Bemisia tabaci isolate MEAM1 Scaffold499,  
whole genome shotgun sequence 972 bp

ATACGAGGTCTGTTAGATTAGAAACCGGATTTTGGTCATAACTAGCCCACAATGCGTCCG  
ATTTAGGTTTTCTTGAGCTTTCCTGATAGCTGGAAATATACTTAAGAACGCTACGTTAC  
AGATTTTGTTATTTTGATCAGTGTTTATTCTGTGTCATCTTGAATACGAGTAAGTCAGG  
TGCGTTTTGCGATTTTAGCATGCGATCACTGACAGAGCAAAGATTCAACACTAAATTTTG  
TTTTCAAACCTCGGTATACCTTGTACCGAACTTTTGGTATATGCTAAGAAAAGTTTACCAT  
GATCATTGTATGAGATGTTCCCACTGTTTTGAATGGGTAAACGATTCAAACTGGTCAG  
GAGTTCGTTAAAGATGAGGAGCGTGGAATAATCGACCCTCAACGGCGACTGACATTTGT  
CACGTGGAAGAAATGCGGGCAAAAGTGCTCGAAAATGGTCGTTTCGAGCTTGTTGAACAA  
AGTCATATTTCTGAAGGCTCTGTACATACAATTTTGATAGAATATGTAGACACGCATCGA  
GTTTCAGGTACACTTGCCCTTGATTGTTGTCCTTTGAACGAAAATCCAACCAAATGTCA  
AATTACCTTTAGCTGCTTGAACGTTCTAACAATGATCCTACATTTTTGGATAGGATAATT  
TTCGGTGACAATACTTTAGTGTACGGCTACGATATGGAGACGAACTCCAATCGTCCTTG  
TGGGTTGAAAAATGTTGTGCAAGACCGAAAAAGAGAGACAAGTTCGGTCAAACATAAAA  
ATCGCAAAACACCTTGAGGTTGCCTTACTTCAAGCCACATACCAACGAAGCTAATTACG  
ATTTTCAAATTTGTGAACGTAGCGTTCTTAAATATATTTTCAGCTATCAGAAAAGCTCA  
AGAAAACGTAATTTGGACGCATTGTAGGCTAGTTATGACAAAAATCCGGTTTCTAATCTA  
ACAGACCTCGTA

--

>Btmar1.8.48\_gi-1092455472-gb-MAMS01000033\_1-:303544-304511  
gi-1092455472-gb-MAMS01000033.1-:303544-304511 Bemisia tabaci isolate MEAM1 Scaffold176, whole  
genome shotgun sequence 968 bp

TACGAGGTCTGTTAGATTAGAAACCGGATTTTGGTCATAACTAGCCCACAATGTGTCCGG  
ATTAGGTTTTCTTGAGCTTTCCTGATAGCTGGAAATATAATTAAGAACGCTACGTTACACA

GATTTTGTATTATTTGATCAGTGTTTATTCTGTGTCATCTTGAATATGAGTAAGTCAAGT  
GCGTTTTGCGATTTTAGCCTGCGATCACTGACAGAGCAAAGATTCAACATTAAATGTTGT  
TTTAAACTCGGTATACCTTGACCGAACTTTTGGTATACGCTAAGAAAAGTTTACCATG  
ATCATTGTATGAGATGTTCCCACTGTTTTGAATGGGTAAACGATTCAAACTGGTCAGG  
AGTTTGTCAAAAATGAGGAGCATGGGAATCGACCCTAACGGCGACTGACATTTGTCACG  
TGGAAGAAATGCGGGCAAAGTGCTCGAAAATGGTCGTTTCGAGCTTGTTGAACAGAGTA  
ATATTCGGAAGGCTCTGTACATACAATTTTGATAGAATATGTAGACACGCAACGAGTTT  
CAGGTACACTTGCCCTTGATTGTTGTCCGTTGAACGAAAATCCAACCAAATGTCAAATT  
ACCTTTAGCTGCTTGAACGTTCTAACAATGATCCTACATTTTGGATAGGATAATTTTCG  
GTGACAATACTTTAGTGTACGGCTACGATATGGAGACGAACTCCAATCGTCCTTGTTGGG  
TTGAAAAATGTTGTGCAAGACCGAAAAAAGAGAGACAAGTTCGGTCAAACATAAAAATCG  
CAAAACACCCTTGAGGTTGCCTTACTTCAAGCCACATACCAACGAAGCTAATTAGGATTT  
TTCAAATTTGTGAACGTAGCGTTCTTAAATATATTTTCAGCTATCAGAAAAGCTCAAGAA  
AACGTAATTTGGACGCATTGTAGGCTAGTTATGACCAAATCCGGTTTCTAATCTAACAG  
ACCTCGTA

--

>Btmar1.8.49\_gi-1092441201-gb-MAMS01006425\_1-:58013-58983

gi-1092441201-gb-MAMS01006425.1-:58013-58983 Bemisia tabaci isolate MEAM1 Scaffold3449, whole  
genome shotgun sequence 971 bp

ATACGAGGTCTGTTAGATTAGAAACCGGATTTTGGTCACAACTAACCCACAATGCGTCCA  
AATTAGGTTTTCTTGAGCTCTCCTGATTGCTGAAAATATACTTAAGAACGCTACGTTAC  
AGATTTTGTATTATTTGATCAGTGTTTATTCTGTGTCATCTTGAATACGACTAAGTCAGA  
TGCGTTTTGCGATTTTCATCATGCGATCACTGATAGAGCAAAGATTCAACATTAAATTTT  
GTTTTAAACTCGGTATACCTTGACCGAACTTTTGGTATATGCTAAGTAAAGTTTACTA  
TGATCATTGTATGAGATGTTTCTACTGTTTTGAATGGGTCAAACGATTCAAACTGGCCA  
GGAGTTCGTCAAAGATGAGGAGCATGGGAATCGACCCTTAACGGCAACTGACATTTGTCA  
CGTGGAAGAAGTGCGGGCAAAGTGCTCGAAAATGGTCGTTCCGAGCTTGTCGAACAGAG  
TAATATTTCTGAAGGCTCTGTACATACAATTTTCATAGAATATGTAGACTCGCATCGAGT  
TTCAGGTACACTTGCCCTTGATTGTTGTCCGTTGAACGAAAATCCAACCAAATGCCAAT  
TTTCCTTTAGCTGCTTGAACGTTCTAACAATGATCCTACATTTTGGATAGGATAATTTT

CGGTGACAATACTTTAGTGTACGGCTACGATATGGAGACGAACTCCAATCGTACTTGTG  
GGTTGAAAAATGTAGTGCAAGACCGAAAAAGAGAGACAAATTCGGTCAAACATAAAAAAT  
CGCAAAACACCCCTTGAGGTTTGCCTTACTTCAAGCCACATACCAACGAAGCTAATTGGGA  
TTTTTCAAATTTGTGAACGTAGCGTTCCTAAGTATATTTTAAGCTATCAGGAGAGCTCAA  
GAAACCTAATTTGGTCGCATTGTGGGCTAGTTATGACCAAAATCCGGTTTCTAATCTAA  
CAGACCTCGTA

--

>Btmar1.8.50\_gi-1092454785-gb-MAMS01000211\_1-:3473564-3474535  
gi-1092454785-gb-MAMS01000211.1-:3473564-3474535 Bemisia tabaci isolate MEAM1 Scaffold651,  
whole genome shotgun sequence 972 bp

ATACGAGGTCTGTTAGATTAGAAACCGGATTTTGGTCATAACTAGCCCACAATGCGTCCG  
AATTAGGTTTTTTTGAGCTTTCCTGATAGCTGAAAATATACTTTAGAACGTAGCGTTCAC  
AGATTTTGTTATTTTGATCAGTGTTTATTCTGTGTCATCTTGAATACGAGTAAGTCAGG  
TGCGTGTTGCGATTTTCATCATGCGATCGCTGATAGAGCAAAAATTCAACATTAAATTAT  
TTTGTTTTAACTCGGTATACCTTGACCGAACTTTTGGTATGTGCCAAAAAAGTTTAC  
CATGATCATTGTATGAGATGTTTCCACTGTTTTGAACGGGTAAACGATTTAAAAGTGGT  
TAGGAGTTCGTCAAAGATGAGGAGCATGGGAATCTATCCTCAACGGCAACTGACACTTG  
CACGAGGAAGAAGTGTTGGGCAAAAGTGCTCGAAAATGGTCGTTTCGAGCTTGTTGAACAG  
AGTAATATTTCTGAAGGCTCTGTACATACAATTTTGATAGAATATGTAGACACGCATCGA  
GTTTCAGGTACACTTGCCCTTGATTGTTGTCCGTTGAACGAAAATCCAACCAAATGTCA  
ATTTCCCTTTAGCTGCTTGAACATTATAACAATGATCCTACATTCTTGGATAGGATAATT  
TTCGGTGACAATACTTTAGTGTACGGCTACGATATGGAGACGAACTCCAATCGTCCTTG  
TGGGTTGAAAAATGTAGTGCAAGACCGAAAAACGAGAGACAAGTTCGGTCAAACATAATA  
ATCGCAATACACCCCTTGAGGTTGCCTTACTTCAAGCCACATACCAACGAAGCTAATTAGG  
ATTTTTCAAATTTGTGAACGTAGCGTTCCTAAATATATTTTCAGCTATCAGAAAAGCTCA  
AGAAAACGTAATTTGGACGCATTGTGGGCTAGTTATGACCAAAATCCGGTTTCTAATCTA  
ACAGACCTCGTA

--

>Btmar1.8.51\_gi-1092454842-gb-MAMS01000203\_1-:989894-990861

gi-1092454842-gb-MAMS01000203.1-:989894-990861 Bemisia tabaci isolate MEAM1 Scaffold637, whole genome shotgun sequence 968 bp

TACGAGGTCTGTTAGATTAGAAACCGGATTTTGGTCATAACTAGCGCACAATGCGTCCGA  
ATTAGGTTTTTTTGAGCTTTCCTGATAGCTGGAAATATACTTAAGAACGCTACGTTCA  
GATTTTGTTTATTTTGATCAGTGTTTATTCTGTGTCATCTTGAATACGAGTAGGTCAGGT  
GCGTTTTGCGATTTTCAGCATGCGATCACTGATAGAGCAAAGACTCAACATTTAATTTTG  
TTTTAAACTCGGTATACTCTGTACCGAACTTTTGGTATGCTAAGTAAAGTTTACCAAGA  
TCATTGTATGAGATGTTCTCACTGTTTTGAGTGGGTAAACGATTCAAACTGGTCAGAA  
GTTTCGTCAAAGATGAGGAGCATGGGAATCGACCCTCAACGGCAACTGACATTTGTCACGT  
GGAAGAAGTGCGAGCAAAGGTGCCCCGAAAATGGTCGTTTCGAGCTTGTTGAACAGAGTAA  
TATTTCTGAAGGCTCTGCACATACAATTTTGATAGAATATGTAGACACGCATCGAGTTTC  
AGGTACACTTGCCCCTTGATTGTTGTCCGTTGAACGAAAATCCAACCAAATGTCAATTTTC  
TCTTTAGCTGCTTGAACGTTGTAACAATGATCCTACATTTTGGATAGGATAATTTTCGG  
TGACAATACTTTAAGTGTACGGCTACGATATGGAGACGAACTCCAATCGTCCTTGTGGG  
TTGAAAAATGTAGTGCAAGACCGAAAAAAGAGAGACAAGTTCGGTCAAACATAAAAAATCG  
CAAAACATCCTTGAGGTTGCCTAACTTCAAGCCACATACCAACAAAGCTAATTATGATTT  
TTCAAATTTGTGAACGTAGCGTTCTTTAATATATTTTCAGGTATCAGAAAAGATCAAGAA  
AACGTAATTTGGACGCAGTGTGGGCTAGTTCTGACCAAATCCGGTTTCTAATCTAACAG  
ACCTCGTA

--

>Btmar1.8.52\_gi-1092427454-gb-MAMS01018084\_1-:255829-256797

gi-1092427454-gb-MAMS01018084.1-:255829-256797 Bemisia tabaci isolate MEAM1 Scaffold859, whole genome shotgun sequence 969 bp

TACGAGGTCTGTTAGATTAGAAACCGGATTTTGGTCATAACTAGCCCACAATGTGTCCGA  
ATTAGGTTTTCTTGAGCTTTCCTCATAGCTGAAAATATACTCAAGAACGCTACGTTCA  
GATTTTGTTTATTTTGATCAGTGTTTATTCTGTGTCATCTTGAATACGAGTAAGTCGGGT  
GCGTTTTGCGATTTTCATCATGCGATCACTGATAGAGCAAAGATTCAACATTAAATTTTG

TTTTAAACTCGGTATACCTTGTACCGAACTTTTGGTGTATGCTAAGTAAAGTTTACCAT  
GATCATTGAATGAGATGTTCCCACTGCTTTGAATGGGTAAACTATTCAAACTGGTCAG  
GAGTTCGTCAAAGATGAGAAGCATGGAAATCGACCCTCAACAGCAACTGACATTTGTCAC  
GTGGAAGAAGTGCGGGCAAAAGTGCTCGAAAATGGTCGTTCCGAGCTTGTTGAACAGAGT  
AATATTTCTGAAGACTCTGTACATACAATTTTGATAGAATATGTAGACCCGCATGGAGTT  
TCAGGTACACTTGCCCCTTGAGTGCTGTCCGTTGAACGAAAATCCAACCAAATGTTAATT  
TCCCTTTAGCTGCTTGAACGTTCTAACAATGATCCTACATTTTTGGATAAGATAATTTTC  
GGTGACAATACTTCGGTGACGGCTACGATATGGAGACGAACTCCAATCGTCCTTGTTGG  
GTTGAAAAATGTAGTGCAAAACCGAAAAAAGAGAGACAAGTTCGGTCAAACATAAAAAATC  
GCAAAACACCCTTGAGGTTGCCTTACTTCAAGCCACATACCAACGAAGCTAATTAAGATT  
TTTCAAATTTGTGAACGTAGCGTTCTTAATTATAATTTTCAGCTATCAGAAAAGCTCAAGA  
AAACGTAATTTGGACGCATTGTGGGCTAGTTATGACCAAATCCGTTTTCTAATCTAACA  
GACCTCGTA

>Btmar1.8.53\_gi-1092434920-gb-MAMS01010618\_1:-57-1025

gi-1092434920-gb-MAMS01010618.1:-57-1025 Bemisia tabaci isolate MEAM1 Scaffold52350, whole  
genome shotgun sequence 969 bp

TACGAGGTCTGTTAGATTAGAAACCGGATTTTGGTCATAACTACCCCAATGCGTTCAA  
ATTACGTTTTCTTGAGCTCTTCTGATAGCTGGAAATATACTTAAGAACGCTACGTTACA  
GATTTTGTTTATTTTGATCAGTGTTTATTCTGTGTCATCTTGAATACGAGTAAGTCAGGT  
GCGTTTTGCGATTTTCATCATGCGATCACTGATAGAACAAGATTCAACATTAAATTTTG  
TTTTAAACTCGGTATACCTTGTACCAAACTTTTGGTATACGCTAAGTCTAGTTTGCCAT  
GATCATTGTATGGGATGTTCCCACTGTTTTGAATGAGTTAAACGATTCAAACTGGTCAG  
GAGTTTGTCAAAGATGAGGAGCATGGGAATCGACCCTCAACGTAAGTACATTTGTCAC  
GTGGAAGAAATGCGGGCAAAAGTGCTCGAAAACGGTCGTTTCGAGCTTGTTGAACAGAGT  
AATATTTCTGAAGGCTCTGTACATACAATTTTGATAGAATATGTAGACACGCATCGAGTT  
TCAGGTACACTTGCCCCTTGATTGTTGTCCGTTGAACGAAAATCCAACCAAATGTCAATT  
TCCCTTTAGCTGCTTGAACGTTCTAACAGTGATCCTACATTTTTGGATAGGATAATTTTC  
GGTGACAATATTTTAGTGACGGCTACGATATGGAGACAAAACCTCCAATCGTCCTTGTTGG  
GTTGAAAAATGTAGTGCAAGACCGAAAAAAGAGAGGCAAGATCGGTGAAACATAAAAAATC  
GCAAAACACCCTTGAGGTTGCCTTACTTCAAGCCACATACCAACGAAGGTCATTAGGATT



TTTCAAACCTTATGAACGTAGCGTTCTTAAGTATATTTCCAGCTATCAGAAAAGCTCAAGA  
AAACGTAATTTGGACGCATTGTGGGCTAGTCATGACCAAAATCCGGTTTCTAATCTAACA  
GACCTCGTA

>Btmar1.8.54\_gi-1092446811-gb-MAMS01003786\_1-:1540746-1541713  
gi-1092446811-gb-MAMS01003786.1-:1540746-1541713 Bemisia tabaci isolate MEAM1 Scaffold2348,  
whole genome shotgun sequence 968 bp

ATACGAGGTCTGTTAGATTAGAAACCGGATTTTGGTCATAACTAGCTTACAATGCGTCCG  
AATTAGGTTTTCTTGAGCTTTTATGATAGCTGGAAATATACTTGAGAACGCTACGTTAC  
AGATTTTGTTATTTTGATCAGTGTTTATTCTGTGTCATCTTGAATACAAGTAAGTCAGG  
TGCGTTTTGCGATTTTCAGCATGCGATTACTGATAGAGCAAAGACTCGACATTTAATTTT  
GTTTTAACTAGGTATACCTTGTAACCGAACTTTTGGTATGCTAAGTAAAGTTTACCAAG  
ATCATTGTATGAGATGTTCCCACTGTTTTGAGTGGGTAAACGATTCAAACTGGTCAGC  
AGTTCGTGAAGATGAGGAGTATGGGAATCTACCTCAACGGCAACTGACATTCGTCACG  
TGGAAGAAGTGCGGGCAAAGTGCTCGAAAATGGTCGTTTCGAGCTTGTTGAACAGAGTA  
ATATTTCTGAAGGCTATGTGCATACAATTTTGATAGAATATGTAGACACGCATCGAGTTT  
CAGGTACACTTGCCCCCTTGATTGTTGTCCGTTGAACGAAAATACAACCGAATGTCAATTT  
CCCTTTAGCTGCTTGAACGTTCTAACAATGATCCTACATTTTTGGATAGGATAATTTTCT  
GTGACAATACTTTAGTGTACGGCTACGATATGGAGACGAACTCCAATCGTCCTTGTTGGG  
TTGAAAAATGTAGTGCAAGACCGAAAAAAGAGAGACAAGTTCGGTCAAACATAAAAAATCG  
CAAAACACCCTTGAGGTTGCCTTACTTCAAGCCACATACCAACAAAGCTAATTATGATTT  
TTCAAATTTGTGAACGTAGCGTTCTTAAATATATTTTCAGCTATCAGAAAAGCTCAAGAA  
AACGTAATTTGGACGCATTGTGGGCTAGTTATGACCAAAATCCGGTTTCTAATCTAACAG  
ACCTCGTA

--

>Btmar1.8.55\_gi-1092454772-gb-MAMS01000214\_1-:342443-343411  
gi-1092454772-gb-MAMS01000214.1-:342443-343411 Bemisia tabaci isolate MEAM1 Scaffold657, whole  
genome shotgun sequence 969 bp

ATACGAGGTCTGTTAGATTAGAAACCGAATTTTGGTCATAACTAGCCACAATGCGTCCG  
ATTCGGTTTTCTTGAGCTTTCCTGATAGCTGGAAATATACTTATGAACGCTACGTTAC  
AGATTTTGTTATTTTGATCAGTGTTTATTCTGTGTCATCTTGAATACGAGTAAGTCAGG

TGCGTTTTGCGATTTTAGCATGCGATCACTGACAGAGCAAAGATTCAACATTAAATTTG  
TTTTAAACTCGGTATACCTTGTACCGAACTTTTGGTATATGCTAAGAAAAGTTTACCAT  
GATCATTGTATGAGATGTTCCCACTGTTTTGAATGGGTAAACGATTCAAACTGGTCAG  
GAGTTCGTAAAGATGAGAAGCGTGGAATCGACCCTCAACGGCGACTGACATTTGTCAC  
GTGGAAGAAATGCGGGCAAAAGTGCTCGAAAATGGTCGTTTCGAGCTTGTTGAACAAAGT  
CATATTTCTGAAGGCTCTGTACATACAATTTTGATATAATATGTAGACACGCATCGAGTT  
TCAGGTACACTTGCCCCTTCATTGTTGTCCTTTGAACGAAAATCCAACCAAATGTCAAAT  
TACCTTTAGCTGCTTGAACGTTCTAACAATGATCCTACATTTTTGGATAGGATAATTTTC  
GGTGACAATACTTTAGTGACGGCTACGATATGGAGACGAACTTCAATCGTCCTTGTGG  
GTTGAAAAATGTTGTGCAAGACCGAAAAAAGAGAGACAAGTTCGGTCAAACATAAAAAATC  
GCAAAACACCCTTGAGGTTGCCTTACTTCAAGCCACATACCAACGAAGCTAATTAGGATT  
TTTCAAATTTGTGAACGTAGCGTTTTTAAATATATTTTCAGCTATCAGAAAAGCTCAAGA  
AAACGTAATTTGGACGCACTGTAGGCTAGTTATGACCAAATCCGGTTTCTAATCTAACA  
GACCTCGTA

--

>Btmar1.8.56\_gi-1092454581-gb-MAMS01000286\_1-:260162-261131  
gi-1092454581-gb-MAMS01000286.1-:260162-261131 Bemisia tabaci isolate MEAM1 Scaffold1011,  
whole genome shotgun sequence 970 bp

ATACGAGGTCTGTTAGATTAGAATCCGGATTTTGGTCATAACTAGCCCACAATGCGTCCA  
AATTACGTTTTCTTGAGCTTTTCTGATAGCTGGAAATATACTTAGGAACGCTACGTTAC  
AGATTTTGTCTTACTTTGATCAGTGTTTATTAGTGTCATCTTGAATACGAGTAAGTCAGG  
TGCGTTTTGCGATTTTCATCATGCGATCACTGATAGAACAAAGATTCAACATTAAATTTT  
GTTTTAAACTCGGTATACCTTGTACCGAAACCTTTGGTATGCGCTAATTAAAGTTTACCA  
TGATCATTGTATGAGATGTTCCCACTGTTTTGAATGAGTTAAACGATTCAAACTGGTCA  
GGAGTTCATCAAAGATGAGGAACATGGGAATCGACCCTCAACGGCAACTGACATTTGTCA  
CGTGGAAGAAATGCGGGCAAAAGTGCTCGAAAACGGTCGTTTCGAGCTTGTTGAACAGAG  
TAATATTTCTGAAGGCTCTGTACATACAATTTTGATAGAATATGTAGACACGCATCGAGT  
TTCAGGTACACTTGCCCCTCGATTGTTGTCGGTTGAACGAAAATCCAACCAAATGTCAAT  
TCCCCTTAGCTGCTTGAACGTTCTAACAGTGATCCTACATTTTTGGATAGGATAATTTT

CGGTGACAATATTTTAGTGTACGGCTACGATATGGAGGCTAAACTCCAATCGTCCTTGTG  
GATTGAAAAATGTAGTGCAAGACCGAAAAAAGAAAGACAAGTTCGGTGAAACATAAAAAAT  
CGCAAAACACCCCTTGAGGTTGCCTTACTTCAAGCCACATACCAACAAAGCTCATTAGGAT  
TTTTCAAACCTTGTGAACGTAGCGTTCTTAAGTATATTTCCAGCTATCAGAAAAGCTCAAG  
AAAACGTAATTTGGACGCATTGTGGGCTAGTTATGACCAAATCCGGTTTCTAATCTAAC  
AGACCTCGTA

--

>Btmar1.8.57\_gi-1092455658-gb-MAMS01000005\_1-:761021-761990  
gi-1092455658-gb-MAMS01000005.1-:761021-761990 Bemisia tabaci isolate MEAM1 Scaffold111, whole  
genome shotgun sequence 970 bp

ATACGAGGTCTGTTAGATTAGAAACCGGATTTTGGTCATAACTAGCTCACAATGCATCCG  
AATTAGGTTTTCTTGAGCTTTCCTGATAGCTGGAAATATACTTAAGAACGCTACGTTAC  
AGATTTTGTTATTTTGATCAGTGTTTATTCTGTGTCATCTTGAATACGAGTAGGTCAGG  
TGCGTTTTGCGATTTTCAGCATGCGATCACTGATAGAGCAAAGACTCAACATTTAATTTT  
GTTTTAAACTCGGTATACTCTGTACCGAAACTTTTGGTATGCTAAGTAAAGTTCACCAAG  
ATCATTGTATGAGATGTTCCCACTGTTTTGAGTGGGTAAACGATTCAAACTGGTCAGA  
AGTTCGTCAAAGATGAGGAGCATGGGAATCGACCCTCAACGGCAACTGACATTAGTCACG  
TGGAAGAAGTGCGAGCAAAAGTGCTCGAAAATGGTCGTTTCGAGCTTGTTGAACAGAGTA  
ATATTTCTGAAGGCTCTGCAATTACAATTTTGATAGAATATGTAGACACGCATCGAGTTT  
CAGGTACACTTGCCCCTTGATTGTTGTCTGTTGAACGAAAATCAAACCAAATGTCAATTT  
CCCTTTAGCTGCTTGAACGTTCTAACAATGATCCTACATTTTTGGATAGGATAATTTTCG  
GTGACAATACTTAAGTGTACGGCTACGATATGGAGACGAAACTCCAATCGTCCTTGTGGG  
TTGAAAAATGTAGTGCAAGACCGAAAAAAGAGAGACAAGTTCGGTGAAACATAAAAAAT  
CGCAAAACACCCCTTGAGGTTGCCTAACTTCAAGCCACATACCAACAAAGCTATTTATGAT  
TTTTCAAATTTGTGAACGTAGCGTTCTTAATATATTTTCAGCTATCAGAAAAGCTCAAG  
AAAACGTAATTTGGACGCATTGTGGGCTAGTTATGACCAAATCCGGTTTCTAATCTAAC  
AGACCTCGTA

--

>Btmar1.8.58\_gi-1092436272-gb-MAMS01009266\_1-:165630-166398  
gi-1092436272-gb-MAMS01009266.1-:165630-166398 Bemisia tabaci isolate MEAM1 Scaffold46539,  
whole genome shotgun sequence 769 bp

GATCACTGACAGAGCAAAGATTCAACACTAAATTTTGTTCAGCTCGGTATACCTTGTA  
CCGAAACTTTTGGTATATGCTAAGAAAAGTTTACCATGATCATTGTATGAGATGTTCCCA  
CTGTTTTGAATGGGTAAACGATTCAAACTGGTCAGGAGTTCGTAAAGATGAGGAGCG  
TGGGAATAATCGACCCTCAACGGCGACTGACATTTGTCACGTGGAAGAAATGCGGGCAAA  
AGTGCTCGAAAATGGTCGTTTCGAGCTTGTGTAACAAAGTCATATTTCTGAAGGCTCTGT  
ACATACAATTTTGATAGAATATGTAGACACGCATCGAGTTTCAGGTACACTTGCCCCTTG  
ATTGTCGTCCTTTGAACGAAAATCCAACCAAATGTCAAATTACCTTTAGCTGCTTGAACG  
TTCTAACAATGATCCTACATTTTGGATAGGATAATTTTCGGTGACAATACTTTAGTGTA  
CGGCTACGATATGGAGACGAACTCCAATCGTCCTTGTGGGTTGAAAAATGTTGTGCAAG  
ACCGAAAAAAGAGAGACAAGTTCGGTCAAACATAAAAATCGCAAAACACCCTTGAGGTTG  
CCTTACTTCAAGCCACATACCAACGAAGCTAATTACGATTTTTCAAATTTGTGAACGTAG  
CGTTCTTAAATATATTTTCAGCTATCAGAAAAGCTCAAGAAAACGTAATTTGGACGCATT  
GTAGGCTAGTTATGACAAAAATCCGGTTTCTAATCTAACAGACCTCGTA

--

>Btmar1.8.59\_gi-1092454908-gb-MAMS01000185\_1-:470151-471121  
gi-1092454908-gb-MAMS01000185.1-:470151-471121 Bemisia tabaci isolate MEAM1 Scaffold591, whole  
genome shotgun sequence 971 bp

TACGAGGTCTGTTAGATTAGAAACCGGATTTTGGTCATAACTACCCACAATGCGTCCAA  
ATTACGTTTTCTTGAGCTCTTCTGATAGCTGGAAATATACTTAGGAACGCTACGTTACA  
GATTTTGTTATTTTGATCAGTGTTTATTCTGTGTCATCTTGAATGCGAGTAAGTCAGGT  
GCGTTTTGCGATTTTCAGCATGCGATCACTGATAGAACAAAGATTCAACATTAAATTTTG  
TTTTAAACTCGGTATACCTTGTGCCAAAACTTTTGGTATACGCTAAGTAAAGTTTACCAT  
GATCATTGTATGAGATGTTCCCACTGTTTTGAATGAGTTAAACGATTCAAACTGGTCAG  
GAGTTCGTCAAAGATGAGGAGCATGGGAATCGACCCTCAACGGCAACTGACATTTGTCAC  
GTGGAAGAGATGCGGGCAAAAAGTGCTCGAAAACGGTCGTTTCGAGCTTGTGTAACAGAGT  
AATATTTCTGAAGGCTCTGTACATACAATTTTGGTAGAATATGTAGACACGCGCATCGAG  
TTTCAGGTACACTTGCCCCTTGATTGTTGTTTCGTTGAATGAAAATCCAACCAAATGTCAA

TTTCCCTTTAGCTGCTTGAACGTTCTAACAGTGATCCTACATTTTTGGATAGGATAATTT  
TCGGTGACAATATTTTAGTGTACGGCTACGATATGGAGACAAAACCTCCAATCGTCCTTGT  
GGGTTGAAAAATGTAGTGCAAGACCGAAAAAAGAGAGACAAGTTCGGTGAAACATAAAAA  
TCGCAAAACAACCTTGAGGCTGCCTTACTTCAAGCCACATACCAACAAAGCTCATTAGAA  
TTTTTCAAACCTTGGAACGTAGCGTTCTTAAGTATATTTCCAGCTATCAGAAAAGCTCAA  
GAAAACGTAATTTGGACGCATTGTGGGCTAGTTATGACCAAATCCGGTTTCTAATCTAA  
CAGACCTCGTA

>Btmar1.8.60\_gi-1092454908-gb-MAMS01000185\_1-:413788-414755

gi-1092454908-gb-MAMS01000185.1-:413788-414755 Bemisia tabaci isolate MEAM1 Scaffold591, whole  
genome shotgun sequence 968 bp

ATACGAGGTCTGTTAGATGAGAAACCGGATTTTGGTCTTAAGTACCCACAATGCGTCCA  
AATTAGGTTTTCTTGAGCTCTTCTGATAGCTGGAAATATACTTAGGAACGCTACGTTAC  
AGGCATTGTTATTTTGATCAGTGTTTATTCTGTGTCATCTTGAATGCGAGTAAGTCAGG  
TGCGTTTTGCGATTTTCAGCATGCGATCACTGACAGAGCAAAGACTCAACATTTAATTTT  
GTTTTAAACTCGGTATACCTGTACCGAACTTTTGGTATGCTAAGTAAAGTTTACCATG  
GTCATTGTATGAGATGTTCCCACTGTTTTGAGTGGGTAAACGATTCAAACTGGTCAGG  
AGTTCGTCGAAGATGAGGAGTATGGGAATCGACCCTCAATGGCAACTGACATTTGTCACG  
TGGAAGAAGTGCAGGCAAAAGTGCTCGAAAATGGTCGTTTCGAGCTTGTTGAACAGAGTA  
ATATTTCTGAAGGCTCTGTACATACAATTTTGATAGAATATGTAGACACGCATCGAGTTT  
CAGGTACACTTGCCCCTTGATTGTTGTCCGTTGAATGAAAATCCAACCAAATGTCAATTT  
CCCTTTAGCTGCTTGAACGTTCTAACAAATGATCCTACATTTTTGGATAGGATAATTTTCG  
GTGACAATACTTTAGTGTACGGCTACGATATGGAGACCAAACCTCCAATCGTCCTTGTGGG  
TTGAAAAATGTAGTGCAAGACCGAAAAAAGAGAGACAAGTTCGGTGAAACATAAAAAATCG  
CATAACACCATTGAGGTTGCCTTACTTTAAGCCACATACCAACAAAGCTAATTATGATTT  
TTCAAATTTGTGAGCGTAGCGTTCTTAAATATATTTTCAGCTATCAGAAAAGCTCAAGAA  
AACGTAATTTGGACGCATTGTGGGCTAGTTATGACCAAATCCGGTTTCTAATCGAACAG  
ACCTCGTA

--

>Btmar1.8.61\_gi-1092452725-gb-MAMS01001096\_1-:1618539-1619505  
gi-1092452725-gb-MAMS01001096.1-:1618539-1619505 Bemisia tabaci isolate MEAM1 Scaffold1294,  
whole genome shotgun sequence 967 bp

TACGAGGTCTGTTAGATTAGAAACCGGATTTTGGTCATAACTAGCCCACAATGCGTCCGA  
ATTAGGTTTTCTTGAGCTTTCCTGATAGCTGAAAATATACTTAAGAACGCTACGTTACA  
GATTTTGTTTATTTTGATCAGTGTTTATTCTGTGTCATCTTGAATACGAGTAAATCGGGT  
GCGTTCTGTGATTTTCATCATGCGATCACTGATAGAGCAAAGATTCAACATTAAATTTTG  
TTTTAAACTCGGTATACCTTGTAACGAACTTTTGGTATATGCTAAGTAAAGTTTACCAT  
GATCATTGTATGAGATGTTCCCACTGTTTTGAACGAGTTAAACGATTCAAACTGGTCAG  
GAGTTCGTCAAAGATGAGGAGCATGGGAATCGACCCTCAGCGGCAACTGACATTATTGTC  
ACGTGGAAGAAGTGCGGGCAAAAGTGCTCGAAAATGGTCGTTTCGAGCTTATTGAACAGA  
GTAATATTTCTGAAGGCTCCGTACATACAATTTTGATAGAATATGTAGACACGCATCGAG  
TTTCAGGTACACTTGCCCCTTGATTGTTGCCCGTTGAACGAAAATCCAACCAAATGTCAA  
TTCCATTTAGCTGCTTGAACGTTCTAACAATGATCCTACATTTTTGGTTAGGATAATTT  
TCAGTGACAGTACTTTAGTGTATGGCTACGATACGGAGACGAACTCCAATCGTCCTTGT  
GGGTTGAAAAATGTAGTGTAACCGAAAAAGAGAGACAAGTTCAGTCAAACATACAAA  
TCGCAAAACACCCTTGAGGTTGCCTTACCTCAAGCCACATACCAACGAAGCTAATTAGGA  
TTTTCAAATTTGTGAACGTAGCGTTCTTAAATATATTTTCAGCTATCAGAAAAGCTCAAG  
AAAACGTAATTTGGACGCATTGCAGGCTAGTTATGACCAAATCCGGTTTCTAATCTAAC  
AGACCTC

>Btmar1.8.62\_gi-1092452725-gb-MAMS01001096\_1-:63840-64765  
gi-1092452725-gb-MAMS01001096.1-:63840-64765 Bemisia tabaci isolate MEAM1 Scaffold1294, whole  
genome shotgun sequence 926 bp

TACGAGGTCTGTTAGATTAGAAACCGGATTTTGGTCATAACTAGCCCACAATGTGTCCAA  
ATTAGGTTTTCTTGAGCTTTCCTAATAGCTGGAAATATACTTAAGAACGCTACGTTACA  
GATTTTTTTTTATTTTGATCAGTGTTTATTCTGTGTCATCTTGAATACAAGCAAGTTAGG  
TGCGTTTTGCGATTTTCATGATGCGATCACTGATAGAGCAAAGATTCAACATATAATTTT  
GTTTCAAACCTCGGTATACCTTGTAACGAACTTTTGGCATATGCTAAGTAAAGTTTACCA  
TGATCATTGAATGAGATGTTCCCACTGTTTTGAATGGGTAAACGATTCAAACTGGTCA  
GGAGTTCGTCAAAGATGAGGAGCATGGGAATCGACCCTCAACGGCAACTGACATTTGTCA

CATGGAAGAAGTGCGGGTAAAAGTGCTCGAAAATGGTCGTTTCGAGCTTGTTGAACAGAG  
TAATATTTCTGAAGGCTCTGTGCATACAATTTTGATAGAATATGTAGACACGCATCGAGT  
TTCAGGTACACTTGCCCCTTGATTGTTGTCCGTTGAACGAAAATCCAACCAAATGTTAAT  
TTCCCTTAAGCTGCTTGAACGTTCTAACAATGATTCTACATTTTTGGATAGGATAATTTT  
CGGTGACAATACTTTAGTGTACGGCTATGATACGGAGAAGAACTCCAATCGTTCTTGTG  
GGTTGAAAAATGTAGTGCAAAACCGAAAAAGAGAGACAAGTTCGGTCAAACATAAAAAAT  
CGCAAAACACCCCTTGAGGTTCCCTTACTTCAAGCCACATACCAACAAAGCTAATTAGGAT  
TTTTCAAATTTGTGAACATAGTGTCTTAAATATATTTTCAGCTATCAGAAAAGCTCAAG  
AAAACGTAATTTGGATGCATTGTGGG

>Btmar1.8.63\_gi-1092452725-gb-MAMS01001096\_1:398318-399098  
gi-1092452725-gb-MAMS01001096.1:398318-399098 Bemisia tabaci isolate MEAM1 Scaffold1294,  
whole genome shotgun sequence 781 bp

GTAAGTCAGATGCGTTTTGCGATTTTCATAATGCGATCACTGATAGAGCAAAGATTTAAC  
ATTAGATTTTGTTTTAACTCAGTATACCTTGTCGGAACTTTTGGTTTGCTAAGTAA  
GTTTACAAAGATCATTGTATGAGTTGTTCTTACTGTTTGAGTGGATTAAACAATTCAA  
ACTGGTCAGGAGTCTGTTGAAGATGAGGAGAACGACCATCAATGGCAACTGACATTTGCA  
ACGTGGAAGAAGTGCGGGCAAAAGTGCTCTAAGTTGGTAATTTTGAGCTTGATGAACAGT  
GTAATATTTCTGAAGGCTCTGTACGTACAATTTTGATAGAATATGTAGACATGCATCGAG  
TTTCAGGTACACTTGCCCCTTGATTGTTGTCGTTGAACAAAAATCCAATAAATGTCAA  
TTCCCTTTAGCTGCTTGAACGTTCTAACAATGATCCTACATTTTTGGATAGGATAATTT  
TCAGTGACGAACTTGAGTGTACGGCTACGATATGGAGACGAACTACAATCATCCTTAT  
GGGTTGAAAAAGGTAGTGCAAAACCGAAAAAGTTCGGTCAAACATGAAAATCGCAGAACG  
CGCACGAGGTTGCCTTACTTCAAGGCATATACCGATGATGCTAATTCAGATTTTTGAAAT  
TTATGAAAGTAGCGTTCTTAAGTATATTTCCAGCTAACAGGAAAGTTTAAGAAAACCTAA  
GTCGGGCGCATTGTGGGCTAGTTGTCACCAAATCCGTTTCTAATGTGAGAGACCTCGT

A

--

>Btmar1.8.64\_gi-1092454879-gb-MAMS01000194\_1:3065879-3066846  
gi-1092454879-gb-MAMS01000194.1:3065879-3066846 Bemisia tabaci isolate MEAM1 Scaffold610,  
whole genome shotgun sequence 968 bp

ATACGAGGTCTGTTAGATTAGAAACCGGATTTTGGTCATAACTAGCCCAGAATGCGTCCG  
AATTAGGTTTTCTTGAGCTTTCCTGACAGCTGAAAATATACCTAAGAACGCTACCTTCAC  
AGATTTTGTTTATTTTGATCAGTGTTTATTCTGTGTCATCTTGAATACGAGTAAGTCAGG  
TGCGTTTTGCGATTTTAGCATGCGATCACTGACAGAGCAAAGATTCAACATAAAATTTTG  
TTTTAACTCGGTATACCTTGTACCGAACTTTTGGTATATGCTAAGAAAAGTTTACCAT  
GATCATAGTACGAGATGTCCCCACGGTTTTGAATGGGTAAACGATTCAAACTGGTCAG  
GAGTTCGTCAAAAATGAGGAGCATGGGCATCGACCCTCAACGGCGACTGACATTTGTCAA  
GTGGAAGAAATGTGGGCAAAAGTGCTCGAAAATGTCGTTTCGAGCTTGTTGAACAGAGTT  
ATATTTCTGAAGGCTCTGTACATACAATTTTGATAGAATATGTAGACACGCATCAAGTTT  
CAGGTACACTTGCCCCTTGATTGTTGTCCGTTGAACGAAAATCCAACCAAATGTCAAATT  
ACCTTTAGCTGCTTGAACGTTCTAACAATGATCTTACATTTTTGGATAGGATAATTTTCG  
GTGACAATACTTTAGTGTACGGCTACGATATGGAGACGAACTCCAATCGTCCTTGTGGG  
TTGAAAAATGTTGTGCAAGACCGAAAAAAGAGAGACAAGTTCAGTCAAACATAAAAAATCG  
CAAACACCCCTTGGGGTTGCCTTACTTCAAGCCACATACCAACGAAGCTAATTAGGATTT  
TTCAAATTTGTGAACGTAGCGTTCTTAAATATATTTTCAGCTATCAGAAAAGCTCAAGAA  
AACGTAATTTGGACGCATTGTAGGCTAGTTATGACCAAATCCGGTTTCTAATCTAACAG  
ACCTCGTA

--

>Btmar1.8.65\_gi-1092454059-gb-MAMS01000515\_1-:1027855-1028821  
gi-1092454059-gb-MAMS01000515.1-:1027855-1028821 Bemisia tabaci isolate MEAM1 Scaffold1098,  
whole genome shotgun sequence 967 bp

TACGAGGTCTGTTGGATTAGAAACCGGATTTTGGTCGTAAGTACTAGCCCAGAATGCGTCCGA  
ATTAGGTTTTCTTGAGCTTTCCTGATAGCTGAAAATATACTTAAGAAGCTACGTTACAG  
ATTTTGTTTATTTTGATCAGTGTTTATTCTGTGTCATCTTAAATACGAGTAAGTCAGGTG  
CGTTTTGCGATTTTAGCATGTGATCACTGACAGAGCAATTATTCAACATAAAATTTTGT  
TTAACTCGGTATACCTTGTACCGAACTTTTGGTATATGCTAAGAAAAGTTTACCATGA  
TCATTGTACGAGATGTCCCCACGGTTTTGAATGGGTAAACGATTCAAACTGGTCAGGA  
GTTTCGTCAAAAATGAGGAGCATGGGAATCGACCCTCAACGGCGACTGACATTTGTCACAT  
GGAAGAAATGCGGGCCAAAGTGCTCGAAAATGGTCGTTTCGAGCTTGTTGAACAGAGTAA  
TATTTCTGAAGGCTCTGTACATACAATTTTAATAGAATATGTAGACACGCATCGAGTTTC



GGGTACACTTGCCCCTTGATTGTTGTCCGTTGAACGAAAATCCAACCAAATGTCAAATTA  
CCTTTAGCTGCTCGAACGTTCTAACAATGATCCTACATTTTTGGATAGGATAATTTTCGG  
TGACAATACTTTAGTGTACGGCTACGATATGGAGACGAACTCCAACATCCTTGTGGGT  
TGAAAAATGTTGTGCAAGACCGAAAAAGAGAGACAAGTTCAGTCAAACATAAAAAATCGC  
AAAACACCCTTGAGGTTGCCTTACTTCAAGCCACATACCAACGAAGCTAATTAGGATTTT  
TCAAATTTGTGAACGTAGCGTTCTTAAATATATTTTCAGCTATCAGAAAAGCTCAAGAAA  
ACGTAATTTGGACGCATTGTAGGCTAGTTATGACCAAATCCGGTTTCTAATCTAACAGA  
CCTCGTA

>Btmar1.8.66\_gi-1092455643-gb-MAMS01000008\_1-:1901450-1902420  
gi-1092455643-gb-MAMS01000008.1-:1901450-1902420 Bemisia tabaci isolate MEAM1 Scaffold118,  
whole genome shotgun sequence 971 bp

ATACGAGGTCTGTTAGATTAGAAACCGGATTTTGGTCATAACTAGCCCACAATGCGTCCG  
AATTAAGTTTTCTTGAGCTTTCCTGATAGCTGGAAATATACTTAAGAACGCCACGTACAC  
AGATTTTGCTATTTTGATCAGTGTTTATTCTGTGTCATCTTGAATACGAGTAAGTCAGG  
TGCGTTTTGCGATTTTCATCATGCGATCACTGATAGAGCAAAGATTCAACATTAAATTTT  
GTTTTAAACTCGGTATACCTGTACCGAACTTTTGGTATATGCTATGTAAAGTTTACCA  
TGATCATTGCATGAGATGTTCCCGCTGTTTTGAATGGGTTGAAGGATTCAAACTGGTCA  
GGAGTTCGTCAAAGATGAGGAGCATGCTGGGAATCGACCCTCAACGGCAACTGACATTTG  
TCACGTAGAAGAAGTGCGGGCAAAAGTGCTCGAAAATGGTCGTTTCGAGCTTGTTGAACA  
GAGTAATATTTTTGAAGGCTCTGCACATACAATTCTGATAGAATATGTAGACACGCATCG  
AGTTTCAGGTACACTTGCCCCTTGATTGTTGTCTGTTGAACGAAAATCCAACAAAATGTC  
AATTTCCCTTTAGCTGCTTGACTGTTCTAACAATGATTCTACATTTTTGGATAGGATAAT  
TTTCGGTGACAATACTTTAATGTACGGCTACGATATGGAGACGAACTCCAATCGTCCTT  
GTGGGTTGAAAATGTAGTGCAAGACCGAAAAAGAGAGACAAGTTCGGTCAAACATAAAAA  
TCGCAAAACACCCTTGAGGTTGCCTTACTTCAAGCCACATACCAACGAAGCTGATTAGGA  
TTTTTCAAATTTGTGAACGTAGCGTTCTTAAATATATTTTCTAGCTATCAGAAAAGCTCAA  
GAAAACGTAATTTGGACAAAATTTGGGCTGGTTGTGACCGAAATCCGGTTTCTAATCTAA  
CATACCTCGTA

>Btmar1.8.67\_gi-1092455643-gb-MAMS01000008\_1-:1216460-1217435  
gi-1092455643-gb-MAMS01000008.1-:1216460-1217435 Bemisia tabaci isolate MEAM1 Scaffold118,  
whole genome shotgun sequence 976 bp

CGAGGTCTGTTAGATTAGAAACCGGATTTTAGTGATAACTAGCCATGTAAGCGTCCGAAT  
TAGGTTTCCTTGGACTTTCCTGACAGCTGATAACATACTAAAGAACGCTAGATTCACAGA  
TTTTTTTTATTTTGATCAGTGTTTAATCTGTGTCATCTGGAATACGAGTAAGTCAGGAGC  
GTTTTGCGATTTTCATCATGCGATCACTGATAGAGCAAAGATTCAACAGTAAATTTTGTT  
TTAAACTTGGCATACCTTGTACCGAACTTTTGGTATGCTAAGTAAAGTTTACAAAGATC  
ATTGGATGAGTTATCCTCACTGTTTTGAGTGGGTAAAAGATTTAAACTGGTCTGGAGT  
TCGTCGAAGATGAGGAGCATGGAAATCGACTATCAACGCGGCAACTGACATTTGTCATGT  
GGAAGAGGTGCGGGCAAAAAGTGCTCGAAAATGGTCGTTTCGAGCTTGCTGAACAGTGTA  
TATTTCTGAAGGCTCTATACATACAATTTTGATAGAATAAGTAGACATGCATCGAGTTTC  
AGGTACAGCAGGTACACTTGCCCCTTGATTGTTATCCGTTGAACAAAAATCCAACCAAAT  
GTCAAGTTCCTGTAGCTGCTTGAACGTTCTAACAACGATCCTACATTTTGGATAGGAT  
AATTTTCAGTGACAATACTTGAGTGTACGGCTACGATATGAAGACGAACTCTAATCATC  
CTTGTGGGTGAAAAAAGTAGTGCAAGACCGAAAAAAGAGAGACAAGTTCGGTCAAACAT  
AAAAATCGCAGAACCCCATGAGGTTGCCTTACTTCAAGCCACATACCAACGAAGCTAAT  
TAGGATTTTCAAATTTGTGAAGGTAGCGTTCTTAAGTATATTTCCAGCTACCAGGAAAG  
CTCGAGAAAACCTAATTCAGACGCATTGTGGGCTAGTTATGACCAAATCCGGTTTCTAA  
TCTAACAGACCTCGTA

--

>Btmar1.8.68\_gi-1092453391-gb-MAMS01000823\_1-:1070576-1071543  
gi-1092453391-gb-MAMS01000823.1-:1070576-1071543 Bemisia tabaci isolate MEAM1 Scaffold1194,  
whole genome shotgun sequence 968 bp

ATACGAGGTCTGTTAGATTAGAAACCGGATTTTGGTCATAACTAGCCCACAATGCGTCCG  
ATTTAGGGTTTCTTGAGCTTTTCTGGTAGCTAGAAATATACTTAAGAACGCTACGTTTAC  
AGATTTTGTTATTTTGATCAGTGTTTATTCTGTGTCATCTTGAATACGAGTAGGTCAGG  
TGCGCTTTCGCGATTTTCAGCATGCGATCACTAATAGAGCAAAGACTCAACATTTAATTTT  
GTTTTAACTCGGTATAATCTGTACCGAACTTTTGGTATGCTAAGTAAAGTTTACCAAG

ATCATTGTATGAGATGTTCCCACTGTTTTGAGTGGGTTAAACGATTCAAACTGGTCAGA  
AGTTCGTCAAAGATGAGGAGCATGGGAATCGACCCTCAACGGCAACTGACATTTGTCACG  
TGGAAGAAGTGCGAGCAAAAGTGCTCGAAAATGGTCGTTTCGAGCTTGTTGAACAGAGTA  
ATATTTCTGAAGGCTCTGCACGTACAATTTTGATAGAATATGTAGACACGCATCGAGTTT  
CAGGTACACTTGCCCCTTGATTGTTGTCCGTTGAACGAAAATCCAACCAATTGTCAATTT  
CCCTTTAGCTGCTTGAACGTTCTAACAATGATCCTACATTTTTGGATGGGATAATTTTCG  
GTGACAATACTTTAGTGTACGGCTACGATATGGAGACGAACTCCAATCGTCCTTGTGGG  
TTCAAAAATGTAGTGCAAGACCGAAAAAGAGAGACAAGTTCGGTCAAACATAAAAATCG  
CAAAACACCCTTGAGGTTGCCTAACTGCAAGCCACATACCAACAAAGCTAATTATGATTT  
TTCAAATTTGTGAACGTAGCGTTCTTTAATATGTTTTTCAGCTATCAGAAAAGCTCAAGAA  
AACGTAATTTGGACTCATAGTGGGCTAGTTATGACCAAAATCCGGTTTCTAATCTAACAG  
ACCTCGTA

>Btmar1.8.69\_gi-1092444565-gb-MAMS01004765\_1:-48282-49253

gi-1092444565-gb-MAMS01004765.1:-48282-49253 Bemisia tabaci isolate MEAM1 Scaffold2750, whole  
genome shotgun sequence 972 bp

ATACGAGGTCTGTTAGATTAGAAACCGGATTTTGGTCATAACTAGCCCACAATGCGCCCCG  
ATTTAGGTTTTCTTGAGCTTTCCTGATAGCTGGAAATATACTTAAGAACGCTACGTTTAC  
AGATTTTGTATTTTATTTGATCAGTGTTTATTCTGTGTCATCTTGAATACGAGTAAGTCAGG  
TGCGTTTTGCGATTTTAGCATGCGATCACTGACAGAGCAAAGATTCAACACTAAATTTTG  
TTTTCAACTCGGTATACCTTGACCGAACTTTTGGTATATGCTAAGAAAAGTTTACCGT  
GATCATTGTATGAGATGTTCCCACTGTTTTGAATGGGTTAAACGATTCAAACTGGTCAG  
GAGTTCGTAAAGATGAGGAGCGTGGAATAATCGACCCTCAACGGCGACTGACATTTGT  
CACGTGGAAGAAATGCGGGCAAAAGTGCTCGAAAATGGTCGTTTCGAGCTTGTTGAACAA  
AGTCATATTTCTGAAGGCTCTGTACATACAATTTTGATACAATATGTAGACACGCATCGA  
GTTTCAGGTACACTTGCCCCTTGATTGTTGTCTTTGAACGAAAATCCAACCAAATGTCA  
AATTACCTTTAGCTGCTTGAACGTTCTAACAATGATCCTACATTTTTGGATTGGATAATT  
TTCGGTGACAATACTTTAGGGTACGGCTACGATATGGAGACGAACTCCAATCGTCCTTG  
TGGGTTGAAAAATGTTGTGCAAGACCGGAAAAAGAGAGACAAGTTCGGTCAAACATAAAA  
ATCGCAAAACACCCTTGAGGTTGCCTTACTTCAAGCCACATACCAACGAAGATAATTACG

ATTTTCAAATTTGTGAACGTAGCGTTCTTAAATATATTTTCAGCTATCAGAAAAGCTCA  
AGAAAACGTAATTTGGACGCATTGTAGGCTAGTTATGACAAAAATCCGGTTTCTAATCTA  
ACAGACCTCGTA

>Btmar1.8.70\_gi-1092444565-gb-MAMS01004765\_1-:310147-311118  
gi-1092444565-gb-MAMS01004765.1-:310147-311118 Bemisia tabaci isolate MEAM1 Scaffold2750,  
whole genome shotgun sequence 972 bp

ATACGAGGTCTGTTAGATTAGAAACCGGATTTTGGTCATAACTAGCCCACAATGCGCCCG  
ATTTAGGTTTTCTTGAGCTTTCCCGATAGCTGGAAATATACTTAAGAACGCTACGTTAC  
AGATTTTGTATTTTATTTGATCAGTGTTTATTCTGTGTCATCTTGAATACGAGTAAGTCAGG  
TGCGTTTTGCGATTTTAGCATGCGATCACTGACAGAGCAAAGATTCAACACTAAATTTTG  
TTTTCAACTCGGTATACCTTGTACCGAACTTTTGGTATATGCTAAGAAAAGTTTACCGT  
GATCATTGTATGAGATGTTCCCACTGTTTTGAATGGGTAAACGATTCAAACTGGTCAG  
GAGTTCGTTAAAGATGAGGAGCGTGGGAATAATCGACCCTCAACGGCGACTGACATTTGT  
CACGTGGAAGAAATGCGGGCAAAGTGCTCGAAAATGGTCGTTTCGAGCTTGTTGAACAA  
AGTCATATTTCTGAAGGCTCTGTACATACAATTTTGATAGAATATGTAGACACGCATCGA  
GTTTCAGGTACATTTGCCCTTGATTGTTGTCCTTTGAACAAAAATCCAACCAAATGTCA  
AATTACCTTTAGCTGCTTGAACGTTCTAACAATGATCCTACATTTTTGGATTGGATAATT  
TTCGGTGACAATACTTTAGGGTACGGCTACGATATGGAGACGAAATCCAATCGTCCTTG  
TGGGTTGAAAAATGTTGTGCAAGACCGAAAAAGAGAGACAAGTTCGGTCAAACATAAAA  
ATCGCAAAACACCTTGAGGTTGCCTTACTTCAAGCCACATACCAACGAAGCTAATTACG  
ATTTTCAAATTTGTGAACGTAGCGTTCTTAAATATATTTTCAGCTATCAGAAAAGCTCA  
AGAAAACGTAATTTGGACGCATTGTAGGCTAGTTATGACAAAAATCCGGTTTCTAATCTA  
ACAGACCTCGTA

>Btmar1.8.71\_gi-1092436163-gb-MAMS01009375\_1-:1379819-1380784  
gi-1092436163-gb-MAMS01009375.1-:1379819-1380784 Bemisia tabaci isolate MEAM1 Scaffold4704,  
whole genome shotgun sequence 966 bp

TACGAGGTCTGTTAGATTAGAAAGCGGATTTTGGACATAACTAGCCCACAATTCGTCCGA  
ATCAGGTTTTCTTGAGCTTTCCTGATAGCTAAAAATATACTTAAGAACGCTACGTTACA  
GGTTTTGTTTATTATGATCAGTGTTTATTCTGTCTCATCTTGAATACGAGTAAGTCAGGT  
GCGTTTTGCGATTTTCATGATGCGATCACTGATAGAGCAAAGATTCAACATTAAATTTTG

TTTTAACTCGGTATACCTTGTAACGAACTTTTGGCATATGCTAAGTAAAGTTTACCAT  
GATCATTGTATGAGATGTTCCCACTGTTTTGAATGGATTAAACGATTCAAACTGGTCAA  
GAGTTCGTCAAAGATGAGGAGCATGGGAATCGACCCTCAACGGCAACTGACACGTGTCAC  
GAAGAAGTGCGGGCAAAAGTGCTTGAAAATGGTCGTTTCGAGCTTGTTGAACAGAGAAAT  
ATTTCTGAAGGCTCTGTACATACAATTTTGATAGAATATGTAGACACGCATCGAGTTTCA  
GGTACACTTGCCCCTTGATTGTTGTCCGTTGAACGAAAATCCAACCAAATGTCAATTTCC  
CTTTAGCTGCTTGAACGTTCTAACAATGATCCTACATTTTTGGATAGGATAATTTTCGGT  
GACAAATACTTTAGTGTACGGCTACGATATGGAGACGAACTCCAATTGAATTGTGGGTT  
GAAAAATGTAGTGCAAGACCGAAAAAAGAGAGACAAGTTCGATCAAACATAAAAAATCTCA  
AAACACCCTTGAGGTTGCCTTACTTCAAGCCCCATACCAACGAAGCTAATTAGGATTTTT  
CAAATTTGTGAACGTAGTGTTCTTAAATATATTTTCAGCTATCAGAAAAGCTCAAGATAA  
TGTAATTTGGACGCTTTGTGGGCTAGTTATGACCAAAAATCCGGTTTCTAATCTAACAGAC  
CTCGTA

>Btmar1.8.72\_gi-1092455517-gb-MAMS01000027\_1-:537496-538464

gi-1092455517-gb-MAMS01000027.1-:537496-538464 Bemisia tabaci isolate MEAM1 Scaffold155, whole  
genome shotgun sequence 969 bp

ATACGAGGTCTGTTAGATTAGAAACCGGATTTTGGTCATAACTAGCTTACCGTGCGTCCA  
AATTAGGTTTTCTTGAACCTTCCTGAAACCTGATAACCTACTAAAGAACGCTACGTTAC  
TGATGCTGTTTATTATGATCAGTGTTTATAAGTCATTTTGAATACGAGGAAGTCAGGAGC  
GTTCTGCGATTTTCATCATGCGATCACTGATAGAGCAAAGATTTAACATTCAATTTTGT  
TTAAGCTCGGTATACCTTATACCAAACTTTTGGTATGCTAAGTAAAGTTTACCAAGATC  
ATTGTATGAGTTGTTCTCACTATTTTGAGTGGGTAAACGATTCAAACTGGTCAGGGGC  
TCGTTGAAGATGAGGAGCATGGGAATCGACTATCAACGGCAAGTAACATTTGCCAAGTGG  
AAGAAGTGCCGGCCAAAGTCTCGAAAATGGTCGTTTCGAGCTTGCTGAACAGTGTAATAT  
TTCTGAAGGCTCTGTACATACAATTTTGAAAGAATATGTAGACATGAATCGAGTTTTAGG  
TACACTTGCCCCTTGATTGTTATCCGTTGAACAAAAATCCAACCAAATGTTAATTTCCCT  
ATAGCTGCTTGAACGTTCTAACAATGATCCTACATTATTGGATAGGATAATTTTCGGTGA  
TAATACTTGAGTGTACGGCTACGATACGGAGACGAACTCCAATCATCCTTGTGGATTGA  
AACTGTAGTACAAGACAGAAAAAAGAGAGGCAAGTTCGGTCAAACATAAAAAATCGCATA

ACACCCATGAGGTTGCCGTACTTGAAGCCACATACCAACGAAGCTAATTAAGATTTTTCA  
AATCTGTGAACGTAGCGTTCTCAAGTATATTTACGGAAAGATATCAGGAAAGATCAAGGA  
AAACCTAATTCGGATTTACAGTAGGCTAGTTATGACCAAAATCCGGTTTATATTCTAATA  
GACCTCGTA

>Btmar1.8.73\_gi-1092425808-gb-MAMS01019730\_1-:2578359-2579330  
gi-1092425808-gb-MAMS01019730.1-:2578359-2579330 Bemisia tabaci isolate MEAM1 Scaffold995,  
whole genome shotgun sequence 972 bp

ATACGAGGTCTGTTAGATTAGAAACCGAATTCGGTCATAACTAGCCCACAATGCGTCTG  
AATTAGGTTTTCTTCAGCTTTCCTGATAGCTGAAAATATACTAAAGATCGCTACGTTAC  
AGATTTTGTTATTTTGATCAGTGTTTTTCTGTGTCGTCTTGAATACGAGTAAGTCAGG  
TACGTTTTGCGATTTTCGTCATGCGGCCACTGATAGAGCAAAGATTCAACATTAAATTT  
GTTTTAACTCGGCATACCTGTACCGGAACTTTTGGTAGATACTAAGTAAAGTTTACCA  
TGATCATTGTATGAGATATTCCCACTGTTTTGAATGGGTAAACGATTCAAACTGGTCA  
GGAGTTCGTCAAAAATGAGGAGCATGGGAATCGACCCTCAACGGCAACTCACATTTGTCA  
CGTGGAAGAACTGCGGGCAAAAGTGCTCGAAAATGGTCGTTTCGAGCTTGTTCAACAGCG  
TATAATATTTCTGAAGGCTCTGTACGTACAATTTTGATAGAGTATGTAGACACGCATCGA  
GTTTCAGGTACACTTGCCCTTGATTGTTGTCCGTTGAACGAAAATCCAACCAAATGTCA  
ATTTCCCTTTAGCTGCTTGAACGTTCTAACAATTATCCTACATTTTTGGATAGGATAATT  
TTCGGTGACAATACTTTAGTGTGCGGCTACGATATGAAGACGAACTCCAATCGTCCTTG  
TGGGTTGAAAAATGTAGTGCAAGACCGAAAAAAGAGAGACAAGTTCGGTCAAACATAAAA  
ATCGCAAAACATCCTTGAGGTTGCCTTACTTCAAGCCACATACCAACGATGCTAATTAGG  
ATGTTTCAAATTTGTGAACGTAGCGTTCTTAAATATATTTTCAGCTATCAGAAAAGCTCA  
AGAAAACGTAATTTGGACACACTGTGGGCTAGTTATGAGCAAAATCCGGTTTCTAATCTA  
ACAGACCTCGTA

--

>Btmar1.8.74\_gi-1092425808-gb-MAMS01019730\_1-:3371810-3372623  
gi-1092425808-gb-MAMS01019730.1-:3371810-3372623 Bemisia tabaci isolate MEAM1 Scaffold995,  
whole genome shotgun sequence 814 bp

TACGAGGTCTGTTCAATATGAAACCAGATTTTGGTGATAACTAGCCCACAATGCACCCGA  
ATTAGGTTTCCTTGGACTTTCCTGATAGCTAATAACATATTGAAGAACGCAAGATTCTCA

GATTTTGTTTCATCTTGATCAATGTTCAATTCTGTATCACCTTGAATACGAGTAAGTCAGGT  
GCATTCTGCGATTTTCATGATGCGATTACTGATAGAGCAAAGATTTAACATTACAATTTG  
TTTTAAACTCGGTATACCTTGTAAGTCTGAACTTTTGGTATTCTAAGTAAAGTTTACCAAGA  
ACATTGAATAAGTTGTTCTCTGTTTTGAGTGGTTCAAACGATTCAAACTGGTCAAGA  
GTCTGTCGAAGATGAGGAGCACGGGAATCAACTATCAATGGCAACTGAAATTTGCCACGT  
AGAAGAAATGCGAGCAAAGTGCTCGAAAATAGTTGTTTCGAGCTTGCTGAACAGTGTCA  
TATTTCTGAAGGCTCCGTACATACAGTTCTGATAGAATATTTAGACATGCATCGAGCTTC  
AGGTAACTTGTCCTGATTGCTGCCCCTGAACAAAAATCTAACCGAAAGTCAATTTTC  
CCTTAGCTCCTTGATTTTCTAACTCTAATCTACATTTTGGATAGGATAATTTTCGG  
TGGCAAACTTGAGTGTACGGCTACGATATGGAATCGAACTCCAATCATCCTCGTGGGT  
TGAAAAAGGTAGTGCAAGAGGACCGAAAAAAGAGAAAAGTTCGGTCGGACATAAAAAAT  
CGCAGAACCCCATGAGGTTGCCTTACTTCAAGC

--

>Btmar1.8.75\_gi-1092454709-gb-MAMS01000236\_1-:173658-174625

gi-1092454709-gb-MAMS01000236.1-:173658-174625 Bemisia tabaci isolate MEAM1 Scaffold707, whole  
genome shotgun sequence 968 bp

ATACGAGGTCTGTTAGATTAGAAACCGGATTTTGGTCATAACTAGCCCACAATGCGTCCG  
AATTAGGTTTTCTTGAGCTTTCCTGATAGCTGAAAATATACTTAAGAACGCTACGTTAC  
AGATTTTGTTATTTTGATCGGTGTTTATTCTGTGTCATCTTGTCGAGTAAGTCAGGTGC  
GTTTTGCGACTTTCATCATGCGATCACTGATAGAGCAACGTTTCAACATTAAAATCTGTT  
TTAACTCGGTATACCTGTACCGAACTTTTGGTATATGCTAAGTAAAGTTGACCATGAT  
CATTGTATGAGATGTTCCCACTGTTTTGAATGGGTAAACGATTCAAACTGGTCAGGAG  
TTCGTCAAAGATGAGGAGCACGGGAATCGACCCTCAACGGCAACTGACATTTGTCACGTG  
GAAGAAATGCGGGCAAAGTGCTCGAAAATGGTCGTTTCGAGCTTGTTGAATAGAGTAAT  
ATTTCTGAAGGCTCTGTACATACGATTTTGATAGAATATGTAGACACGCATCGAGTTTCA  
GGTACACTTCCCCCTTGATTGTTGTCCGTTGAACGAAAATCCAACCAAATGTCAATTTCC  
CTTCAGCTGCTTGAACGTTCTAACAATGGTCCTACATTTTGGATAGGATAATTTTTTCG  
GTGAAAATACTTAAGTGCACGGCTACGATATGGAGACGAACCTCCAATCGTCCTTGTGGG

TTGAAAAATGTAGTGCAAGACCGAAAAAAGAAAGACAAGTTCGGTCAAACATAAACATCG  
CAAACATCCTTGAGGTTGCCTTACTTCAAGCCACATACCAGCGAAGCTAATTAGGATAC  
TTCAAATTTGTGAACGTAGCGTTCATTAATATATTTTCAGCTATAAGAAAAGTTCAAGAA  
AACGTAATTTGGACGCATTGTGGGCTAGTTATGACCAAAATCCGGTTTGTAATCTAACAG  
ATCTCGTA

--

>Btmar1.8.76\_gi-1092438384-gb-MAMS01007714\_1-:5549-6511  
gi-1092438384-gb-MAMS01007714.1-:5549-6511 Bemisia tabaci isolate MEAM1 Scaffold39834, whole  
genome shotgun sequence 963 bp

ATACGAGGTCTGTTAGATTAGAAACCGGATTTTGGTCATAACTAGCCCACAATGCGTCCG  
ATTTAGGGTTTCTTGAGCTTTTCTGATAGCTAGAAATATACTTAAGAACGCTACGTTAC  
AGATTTTGTTATTTTGATCAGTGTTTATTCTGTGTCATCTGAATACGAGTAGGTCAGG  
TGCGTTTTGCGATTTTCAGCATGCGATCACTAATAGAGCAAAGACTCAACATTTAATTT  
GTTTTAACTCGGTATAATCTGTACCGAACTTTTGGTATGCTAAGTAAAGTTTACCAAG  
ATCATTGTTCTGTTCCCACTGTTTTGAGTGGGTAAACGATTCAAACTGGTCAGAAGTTC  
GTCAAAGATGAGGAGCATGGGAATCGACCCTCAACGGCAACTGACATTTGTCACGTGGAA  
GAAGTGCGAGCTAAAGTGCTCGAAAATGGTCGTTTCGAGCTTGTTGAACAGAGTAATATT  
TCTGAAGGCTCTGCACATACAATTTTGATAGAATATGTAGACACGCATCGAGTTTCAGGT  
ACACTTGCCCCTTGATTGTTGTCCGTTGAACGAAAATCCAACCAATTGTCAATTTCCCTT  
TAGCTGCTTGAACGTTTTAACAATGATCCTACATTTTTGGATGGGATAATTTTCGGTGAC  
AATACTTTAGTGACGGCTACGATATGGAGACGAACTTTAATCGTCCTTGTTGGGTCAA  
AAATGTAGTGCAAGACCGAAAAAAGAGAGACAAGTTCGGTCAAACATAAAAATCGCAAAA  
CACCTTGAGGTTGCCTAACTTCAAGCCACATACTAACAAAGCTAATTATGATTTTTCAA  
ATTTGTGAACGTAGCGTTCCTTAATATGTTTTCAGCTATCAGAAAAGCTCAAGAAAACGT  
AATTTGCACTCATAGTGGGCTAGTTATGACCAAAATCCGGGTTCTAATCTAACAGACCTC  
GTA

>Btmar1.9.1\_gi-1092428515-gb-MAMS01017023\_1-:2889234-2889888  
gi-1092428515-gb-MAMS01017023.1-:2889234-2889888 Bemisia tabaci isolate MEAM1 Scaffold809,  
whole genome shotgun sequence 655 bp

TACGAGGGCTGTCCCAAAGAAACCGGACTTTTGTATAGAAAGCGAACCAGCGTCGTA



ATGAAGTTTTCTTGGGCTTGTTTGAAAGCTGATAAGCTACTGAGGATGCTTGTTTTTACA  
GAATGCAAAAATTCGTCTTGTAAGGAACTACACGCTTGGAATAAAGGAAAAGTCAAAC  
TCGAGTTGCGATTTTTGTCTTTATTTCAAGAAAAATTTAGATACAACCTAAAAAAAACCC  
AGGTTTTAAGTTAAAAATTCGTTGCTCTCTTATTCAAATGCTTAAAAAAGGAAATTAA  
CATTTAAGCAGCTTACCAAGTCATCACCTATCCCCTTCAAAATTCTCGCCAGCTTTGTC  
GATGCATTTTTGCCACCGTTTCTCAATTGGAAGAAACACTGTTGGAAATCCTCAGGTTT  
GAACGATAGCAATTCCTTCAAGGTGTTCTTGAATTTCCGGAATGGTTTAAAAACGTCG  
ACCTTTCAAGGTAGATTTAAGTCGTGGAAATAAGAAAAAATCACACGGAGCCAGGTCAGG  
TGAATAAGGGGGATGAGGGAGGACACAGGACACTCATGGCATTCTTGCACAAAATTCGC  
GAATTTGGAGGGATGCATGGGCAGGTGCATTATCGTGATGCAGAAACCAGGAATT

--

>Btmar1.9.2\_gi-1092450877-gb-MAMS01001951\_1-:638493-639028  
gi-1092450877-gb-MAMS01001951.1-:638493-639028 Bemisia tabaci isolate MEAM1 Scaffold16276,  
whole genome shotgun sequence 536 bp

GTACGAGGGCTGTCCCAAAGAAACCGGACTTTTGTATAGAAGGCGAACCGAGCGTCGT  
AATGAAGTTTTCTTGGGCTTGTTTGAAAGCTGATAAGCTATTGGAGATGCTTGTTTTTAC  
AGAATGCAAAAATTCGTCTTGTAAGGAACTACACGCTTGGAATAAAGGAAAGTCAAA  
CTCGAGTTGCGATTTTTGTCTTTATTTCAAGAAAAATTTGGATACAACCTAAAAATAAAC  
CCAGGTTTTAAGTTAAAACTTCGTTGCTCTCTTATTCAAATGCTTAAAAATAAGGAAAT  
TAACATTTTAAGCAGCTTACCAAGTCATCACCTATCCCCTTCAAAATACTCGCCAGCTTT  
GTCGATGCATTTTTGCCACCGTTTCTTCAATTGGAAGAAAACTGTTGGAAATCCTCAGG  
TTTGAATGATCGCAATTCCTTCAAGGTGTTCTTGAATTTCCGGAATGGTTTGGAAACG  
TCGACCTTTCAAGGTAGATTTAAGTCGTGGAAATAAAAAAAAATCACACGGAGCCA

>Btmar1.9.3\_gi-1092450877-gb-MAMS01001951\_1-:3954251-3954794  
gi-1092450877-gb-MAMS01001951.1-:3954251-3954794 Bemisia tabaci isolate MEAM1 Scaffold16276,  
whole genome shotgun sequence 544 bp

GTACGAGGGCTGTCCCAAAGAAACCGGACTTTTGTATAGAAGGCGAACCAAGCGTTGT  
AATGAGGTTTTCTTGGGTTTGTTTGAAAGCTGATAAGCTACTGAAAATGCCTGTTTTTAC  
AGAATGCAAAAATTCGTCTTGTAAGCAAACCTACACGCTTGGAATAAAGGAAAGTCAAA  
CTCGAGTTGCGATTTTTGTCTTTATTTCAAGAAAAATTTGGATTCAACTTTAAAAAAAAC

CCAGGTTTTAAATTA AAAA CTTCGTTGCTCTTTTATTCAAATGCTTAAAAATAAGGAAAT  
TAACATTTTAAGCAGCTTACCAAGTCATCACCTATCCCCTTCAAAATACTCGCCAGCTTT  
GTCGATGCATTTTTGCCACCGTTTCTTCAATTGGGAGAAACACTATTGGAAATCCTCAGA  
TTTGAATGATCGCAATTCCTACAAGGTGTTCTCTTGGATTCCGGAATGGTTTGAAAACG  
TCGACCTTCAAGGTAGATTTAAGTCATGAAAATAAGAAAAAATCACACGGAGCCAGGTC  
AGGT

>Btmar1.9.4\_gi-1092450877-gb-MAMS01001951\_1-:4985664-4986203  
gi-1092450877-gb-MAMS01001951.1-:4985664-4986203 Bemisia tabaci isolate MEAM1 Scaffold16276,  
whole genome shotgun sequence 540 bp

TACGAGGGCTGTCCCAAAGAAACCGGACTTTTGT CATAGAAGGCGAACCAAGCGTTGTA  
ATGAAGTTTTCTTGGGCTTGTTGAAAGCTGATAAGCTACTGAAGATACTTGTTTTACA  
GAATGCAAAAATTTGTCTTGGTAAGGAACTACACGCTTGG AATAAAGGAAAAGTCAAAC  
TCGAGTTGCGATTTTTGTCTTTATTTCAAGTAAAATTTAGATACTACTTAAGAAACCCAG  
GTTTTAAGTTAGATACTTCGTTGCTCTCTTATTCAAATGCTTAAAAATAAGGAAATTAAC  
ATTTTAAGCAGCTTACCAAGTCATAACCTATCTCTTCAA AATAGTTGCCAGCTTTGTCA  
ATGCATTTTTGCCACCGTTTCTTCAACTGGGAGAAACACTGTCGGAAATCCGCAGATTG  
AATGATCGCAATTCCTACAATGTGTTCTCTTGAATTTCCGGAATGGTTTGAAAACGTCTGA  
CCTTCAAGGTAGATTTAAGTCGTGGAAATAAGAAAAAATCACACGGAGCCAAGTCAGGT

--

>Btmar1.9.5\_gi-1092453380-gb-MAMS01000828\_1-:70504-71043  
gi-1092453380-gb-MAMS01000828.1-:70504-71043 Bemisia tabaci isolate MEAM1 Scaffold1195, whole  
genome shotgun sequence 540 bp

TACGAGGGCTGTCCCGAAAGAAACCGGACTTTTGT CATAGAAGGCGAACCAAGCGTTGTA  
ATGAAGTTTTCTTGGGCTTGTTGAAAGCTGATAAGCTACTGGAGATGCTTGTTTTACA  
GAATGCAAAAATTCGTCTAGGTAAGGAACTACACGCTTGG AATAAAGGAAAAGTCAAAC  
TCGAGTTGCGATTTTTGTCTTTATTTCAAAAAAATTTGGATACAACTTAAAAAATAA  
ACCCAGGTTTTAAGTTAAAACTTCGTTGCTCTCTCATTCAAATGCTTAAAAATGAGGAA  
ATTAACATTTTAAGCAGCTTACCAAGTCATCACCTATCCCCTTCAAAATACTCGCCAGCT  
TTGTCGATGCATTTTTGCCGCACCGTTTCTTCAATTGGAAGAAACACTGTTGGAAATCCT

CAGGTTTGAATGATCGCAATTCCTTCAAGGTGTTCTTGAATTTCCGGAATGGTTTGAA  
GACGTCGACCATTCAAGGTAGATTTAAGTCGTGGAAATAAGAAAAAATCACACGGAGCCA

--

>Btmar1.9.6\_gi-1092454872-gb-MAMS01000195\_1-:4060795-4061330  
gi-1092454872-gb-MAMS01000195.1-:4060795-4061330 Bemisia tabaci isolate MEAM1 Scaffold613,  
whole genome shotgun sequence 536 bp

TACGAGAGCTGTCCCAAAGAAACCGGACTCTTGTCATAGAAGGCGAACCGAGCGTCGTA  
ATGAAGTTTTCTTGGGCTTGTTGAAAGCTGATAAGCTATTGGAGATGCTTGTTTTTACA  
AAATGCAAAAATTCGTCTTGGTGAGGAACTACACGCTTGAATAAAGGAAAGTCAAAC  
TCGAGTTGCGATTTTTGTCTTTATTTCAAGAAAAATTTGGATACAACTTAAAAATAAAC  
CAGGTTTTAAGTTAAAACTTCGTTGCTCTTATTCAAATGCTTAAAAATAAGGAAATT  
AACACTTTAAGCAGCTTACCGAGTCATCACCTATCCCCTTCAAATACTCGCCAGCTTTG  
TCGATGCATTTTTGCCACCGTTTCTTCAATTGGAAGAAAACTGTTGGAAATCCTCAGGT  
TTGAATGATCGCAATTCCTTCAAGGTGTTCTTGAATTTCCGGAATGGTTTGGAAACGT  
CGACCTTTCAAGGTAGATTTAAGTCGTGGAAATAAGAAAAAATCACACGGGAGCCA

--

>Btmar1.9.7\_gi-1092455197-gb-MAMS01000102\_1-:4578-5120  
gi-1092455197-gb-MAMS01000102.1-:4578-5120 Bemisia tabaci isolate MEAM1 Scaffold337, whole  
genome shotgun sequence 543 bp

TACGAGGGCTGTCCCAAAGAAACCGGACTTTTGTATAGAAGGCGAACCAAGCGTCGTA  
ATGAAGTTTTCTTGGGCTTTTTTGAAGCTGATAAGCTGCTAAAGATGCTTGTTTTTACA  
GAATGCAAAAATTCGTCTTGGTAAGGAAACAACACGCTTGAATAAAGGAAAGTCAAAC  
TCGAGTTGCGATTTTTGTCTTTATTTATGAAAAATGTAGATACAACTTAAAAAAAACCC  
AGGTTTTAAGTTAAAACTTGGTTGATCTTATTCAAATGCTTAAAAATAAGGAAATTA  
TCATTTTAAGCAGCTTACCAAGTCATCACCTATCCCCTTCAAATACTTGCCAGCTTTGT  
CGATGCATTTTTTCCACCGTTTCTTCAACTGCGGGAGAAACACTGTTGGAAATCCTCAG  
GTTTGAATGATCGCAATTCCTACAAGGTGTTCTTGAATTTCCGGAATGGTTTGAAAAC  
GTCGACCTTTCAAGGTAGATTTAAGTCGTGGAAATAAGAAAAAATCACACGGAGCCAGGT  
CAG

--

>Btmar1.9.8\_gi-1092455411-gb-MAMS01000045\_1-:7229083-7229626  
gi-1092455411-gb-MAMS01000045.1-:7229083-7229626 Bemisia tabaci isolate MEAM1 Scaffold199,  
whole genome shotgun sequence 544 bp

TACGAGGGCTGTCCCAAAGAAACCGGACTTTTGT CATAGAAGGCGAACCGAGCGTCGTA  
ATGAAGTTTTCTTGGGCTTGTTTGAAAGCTGATAAGCTAGTAAAGATGATTGTTTTTACA  
GAATGCAAAAATTCGTCTTGTAAGGAACTACACGCTTTGGAATAAAGGAAAGTCAAAC  
TCGAGTTGCGATTTTTGTCTTTATTTCAAGAAAAATTTAGATACAACTTAAAAAAAATCC  
AGGTTTTAAGTTAAAAATTCGTTGCTCTCTTATTCAAATGCTTAAAAATAAGGAAATTGA  
CATTTTAAGCAGCTTTTACCAAGTCATAACCTATCCCCTTCAAATACTTGCCACCTTTG  
TCGATGCATTTTTTCCACCGTTTCTTCAACTGGGAGAAACACTGTTGGAAATCCTCAGA  
TTTGAATGATCTCAATTCCTACAATGTGTTCTTGAATTTCCGGAATGGTTTGAAAACG  
TCGACCTTTCAAGGTAGATTTAAGTCGTTTAAATAAGAAAAAATCACACGGAGCCAGGTC  
AGGT

--

>Btmar1.9.9\_gi-1092434463-gb-MAMS01011075\_1-:327620-328156  
gi-1092434463-gb-MAMS01011075.1-:327620-328156 Bemisia tabaci isolate MEAM1 Scaffold5453,  
whole genome shotgun sequence 537 bp

TACGAGGGCTGTCCCAAAGAAACCGGACTCTTGT CATAGAAGGCGAACCGAGCGTCGTA  
ATGAAGTTTTCTTGGGCTTGTTTGAAAGCTGATAAGCTATTGGAGATGCTTGTTTTTACA  
GAATGCAAAAATTCGTCTTGTAAGGAACTACACGCTTTGGAATAAAGGAAAGTCAAAC  
TCGAGTTGCGATTTTTGTCTTTATTTCAAGAAAAATTTGGATACAACTTAAAAATAAACC  
CACGTTTTAAGTTAAAACTTCGTTGCTCTCTTATTCAAATGCTTAAAAATAAGGAAATT  
CACATTTTAAGCAGCTTACCAAGTCATCACCTATCCCCTTCAAATACTCGCCAGCTT  
TGTCGATGCATTTTTGCCACCGTTTCTTCAATTGGAAGAAAAACTGTTGGAAATCCTCAG  
GTTTGAATGATCGCAATTCCTTCAAGGTGTTCTTGAATTTCCGGGATGGTTTGGAAAC  
GTCGACCTTTCAAGGTAGATTTAATTCGTGGAAATAAAAAAAAATCACACGGAGCCA

--

>Btmar1.9.10\_gi-1092455507-gb-MAMS01000028\_1-:4477837-4478372  
gi-1092455507-gb-MAMS01000028.1-:4477837-4478372 Bemisia tabaci isolate MEAM1 Scaffold161,  
whole genome shotgun sequence 536 bp

GTACGAGGGCTGTCCCAAAGAAACCGGACTTTAGTCATAGAAGGCGAACCAAGCGTCGT  
AATGAAGTTTTCTTGGGCTTGTTTGAAAGCTGATAAGCTACTGGAGATGCTTGTTTTTAC  
AGAATGCAAAAATTCGTCTTGTAAGGAACTACACGCTTTGGAGTAAAGGAAAGTCAAA  
CTCGAGTTGCGATTTTTGTCTTTATTTCAAGAAAAATTTGGATACAACTTAAAAATAAAC  
CCAGGTTTTAAGTTAAAACTTCGTTGCTCTCTTATTCAAATGCTTAAAAATAAGGAAAT  
TTACATTTTAAACAGCTTACCAAGTCATCACCTATCCCCTTCAAATACTCGCCAGCTTT  
GTCGATGCATTTTTGCCACCGTTTCTCAATTGGAAGAAAACTGTTGGAAATCCTCAGG  
TTTGAATGATCGCAATTCCTTTAAGGTGTTCTCTTGAATTTCCGGAATGGTTTGAAAATG  
TCGACCTTTCAAGGTAGATTTAAGTCGTGGAAATAAGAAAAAATCACACGGAGCCA

--

>Btmar1.9.11\_gi-1092444632-gb-MAMS01004733\_1-:1196912-1197453  
gi-1092444632-gb-MAMS01004733.1-:1196912-1197453 Bemisia tabaci isolate MEAM1 Scaffold2737,  
whole genome shotgun sequence 542 bp

TACGAGGGCTGTCCCAAAGAACTGGACTTTTGTCAATTGAAGGCGAACCGAGCGTCGTA  
ATAAAGTTTTCTTGAGCTTGTTGGAAAGCTGATAAGCTACTGAAGATGCTTGTTTTTACA  
GAATGCAAAAATTCGTCTTGTAAGGAACTATACGCTTTGGAATAAAGGAAAAAGTCAAA  
CTCGAGTTGCGATTTTTGTCTTTATTTCAAGAAAAATTTAGATACAACTTAAAAAAACCC  
TGGTTTTAAGTTAAAAATTCGTTGCTCTCTTATTCAAATGCTTAAAAATAAGGAAATTAA  
CATTTTAAGCAGCTTACCAAGTCATAACCTATCCCCTCCAAAATACTCGCCAGCTTTGTC  
GATGCATTTTTTCCCACCGTTTCTTCAATTGGGAGAAACACTGTTGGAAATCCTCAGATT  
TGAATGATCGCAATTCCTACAATGTGTTCTCTTGAATTTCCGGAATGGTTTGAAAACGTT  
GACCTTTCAAGGTAAATTTAAGTCGTGGAAATAAGAAAAAATCACACGGAGCCAGGTCAG  
GT

--

>Btmar1.9.12\_gi-1092452270-gb-MAMS01001295\_1-:646706-647248  
gi-1092452270-gb-MAMS01001295.1-:646706-647248 Bemisia tabaci isolate MEAM1 Scaffold1374,  
whole genome shotgun sequence 543 bp

GTACGAGGGCTGTCCCAAAGAAACCGGACTTTTGTATAGAAGGCGAACCGAGCGTCGT  
AATGAAGCTTTCTTGAGCTTGTTTGAAAGCTGATAAGCTACTGAAGATGCTGGTTTTTAC  
AGAATGCAAAAATTCGTCTTGGAAGGAAATACACGCTTTGGAATAAAGGAAAGTCAAA  
CTCGAGTTGCGATTTTTGTCTTTATTTCAAGAAAAATTTAGATACAACTTAAAAAAAACC  
CAGGTTTTAAGTTAAGAACTTCGTTGCTCTCTTATTCAAATGCTTAAAAATAAGTAAATT  
AACATTTTAAGCAGCTTACCAAGTCATCACCTATCCCCTTCAAATACTCGCCAGCTTTG  
TCGATGCATTTTTGCCACCGTTTCTCAATTGGGAGAAACACTGTTGGAAATCCTCAGAT  
TTGAATGATCGCAATTCCTACAATGTGTTCTCTTGGATTCCGGAATGGTTTGAAAACGT  
CGACCTTTCAAGGTAGATTTAAGTCGTGGAAATAAGAAAAAATCACACGGAGCCAGGTCA  
GGT

--

>Btmar1.9.13\_gi-1092452498-gb-MAMS01001200\_1-:1080372-1080920  
gi-1092452498-gb-MAMS01001200.1-:1080372-1080920 Bemisia tabaci isolate MEAM1 Scaffold1335,  
whole genome shotgun sequence 549 bp

TACGAGGGCTGTCCCAAAGAAACCGGACTTTTGTATAGAAGGCGAACCGAGCGTTGTA  
ATGAAGTTTTCTTGGGCTTGTTTGAAAGCTGATAAGCTACTGAAGATGCTTGTTTTTACA  
GAATGCAAAAATTCGTCTTGGAAGGAACTACACGCTTTGAAATAAAGGAAAGTCAAAC  
TCGAGTTGCGATTTTTGTCTTTAATTCAAGAAAAATTTAGATACAACTTAAAAA  
CCCAGGTTTTAAGTTAAAACTTCGTTGCTCTCTTATTCAAATGCTTAAAAATAAGGAAA  
TTAACATTTTAAGCAGCTTGCCAAGTCATCACCTATCCCCTTCAAATACTCGCCAGCTT  
TGTCGATGCATTTTTGCCACCGTTTCTCCATTGGGAGAAACACTGTTGGAAATCCTCAG  
ATTTGAATAATCGCGCGCAATTCCTACAAGGTGTTCTCTTGGATTCCGGAATGGTTTGA  
AAACGTCGACCTTTCAAGGTAGATTTAAGTCGTGGAAATAAGAAAAAATCACACGGAGCC  
AGGTTAGGT

--

>Btmar1.9.14\_gi-1092453165-gb-MAMS01000916\_1-:2588225-2588784  
gi-1092453165-gb-MAMS01000916.1-:2588225-2588784 Bemisia tabaci isolate MEAM1 Scaffold1224,  
whole genome shotgun sequence 560 bp

TACGAGGGCTGTCCCAAAGAAACCGGACTTTTGT CATAGAAGGCGAACCGAGCGTCGTA  
ATGAAGTTTTCTTGGGTTTGTGTTGAAAGCTGATAAACTACTGAAGATACTTGTTTTTACA  
GAATGCAAAAATTCGTCTTGGAAGGAACTACACGCTTTGGAATAAAGGAAAGTCAAAC  
TCGAGTTGCGATTTTTGTCTTCAAGAAAAAGAGAGTTTTGATTTCAAGAAAAATTTAGAC  
ACAACCTAAAAAAGAAACAGTTTTTAAGTTAAAACTTCGTTGCTCTCTTATTCAAATGC  
TTAAAAATGAGGAAATTAACATTTTAAGCCGCTTACCAAGTCATCACCTATCCCCTTCAA  
AATACTCGCCAGCTTTGTCGATGCATTTTTGCCACCGTTTCTTCAATTGGGAGAAACACT  
GTTGGAAATCCTCAGATTTGAATGATCGCAATTCCTACAAGGTGTTCTCTTGAATTTCCG  
GAATGGTTTGAAAACGTCGACCTTTCAAGGTAGATTTAAGTCGTGGAAATAAGAAAAAAT  
CACACGGAGCCAGGTCAGGT

--

>Btmar1.9.15\_gi-1092425808-gb-MAMS01019730\_1-:3363985-3364638  
gi-1092425808-gb-MAMS01019730.1-:3363985-3364638 Bemisia tabaci isolate MEAM1 Scaffold995,  
whole genome shotgun sequence 654 bp

GTACGAGGGCTGTCCCAAAGAAACCGGACTTTTGT CATAGAAGGCGAACCGAGCGTCGT  
AATGAAGTTTTCTTGGGCTTGTTTGAAAGCTGATAAGCTACTGGAGATGGTTGTTTTTAC  
AGAATGCAAAAATTCGTCTTGGAAGGAACTACACGCTTTGGAATAAAGGAAAGTCAAA  
CTCGAGTTGCGATTTTTGTCTTTATTTCAAGAAAAATTTGGATACAACTTAAGAAAAAAC  
CCAGGTTTTAAGTTAAAACTTCGTTGCTCTCTCATTCAAATGCTTAAAAATGAGGAAAT  
TAACATTTTAAGCAGCTTACCAAGTCATCACCTATCCCTTTCAAATACTCGCCAGCTTT  
TTCGATGCATTTTTGCCACCACCGTTTCTTCAATTGGAAGAAACACTGTTGGAAATCCTC  
AGGTTTGAATGATCGCAATTCCTTCGAGGTGTTCTCTTGAATTTCCGGAATGATTTGAAA  
ACGTCGACCTTTCAAGGTAGATTTAAGTCGTGGAAATAAGAAAAAATCACACGGAGCCAG  
GTCAGGTGAATAAGGGGGATGAGGGAGGACACTCGTGGCATTCTTTGCTCAAAATTCGCG  
AATTTGGAGGGATGCATGGGCAGGTGCATTATCGTGATGCAGAAACCAGGAATT

--

>Btmar1.9.16\_gi-1092436163-gb-MAMS01009375\_1-:1546257-1546906  
gi-1092436163-gb-MAMS01009375.1-:1546257-1546906 Bemisia tabaci isolate MEAM1 Scaffold4704,  
whole genome shotgun sequence 650 bp

TACGAGGGCTGTCCCAAAGAAACCGGACTTTTGT CATAGAAGGCGAACCAAGCGTCGTA  
GTGAAGTTTTCTTGGGCTTGTTGAAAGCTGATAAGCTACTGGAGATGCTGCTTTTACA  
GAATGCAAAAATTTGTCTTGTAAGGAACTACACGCTTGAATAAAGGAAAGTCAAAC  
TCGAGGTGCGATTTTTGTCTTTATTCAAGAAAAATTTGGATACACCTTTAAAAAAACC  
AGGTTTTAAGTTAAAACTTCGTTGCTGTCTTATTCAAATGCTTAAAAATAAGGAAAT  
TAACATTTTAAGCAGCTTACCAAGTCATCACATATCCCCTTCAAATACTCGCCAGCTTT  
GTCGATGCATTTTTGCCACCGTTTCATCAATTGGAAGAAAGACTGTTGGAAATCCTCGGG  
TTTGAATGATCGCAATTCCTTCAAGGTGTTCTTGAATTTCCGGAATGGTTTGAAAACG  
TCGACCTTCAAGGTAGATTTAAGTCGTGGAAATAAGAAAAATCACACGGAGCCAGGTC  
AGGTGAATAAGAGGGGTGAGGGAGGACACTCATGGCATTCTTGACAAAAATTCGCGAATT  
TGGAGGGATGCATGGGCAGGTGCATTATCGTGATGCAGAAACCAGGAATT

--

>Btmar1.9.17\_gi-1092455544-gb-MAMS01000025\_1-:3503104-3503754  
gi-1092455544-gb-MAMS01000025.1-:3503104-3503754 Bemisia tabaci isolate MEAM1 Scaffold147,  
whole genome shotgun sequence 651 bp

GTACGAGGGCTGTCCCAAAGAAACCGGACTTTTGT CATAGAAGGCGAACCGAGCGTCGT  
AATGAAGTTTTCTTGGACTTGTTTGAAAGCTGATAAGCTACTGGAGATGCTTGTTTTAC  
AGAATGCAAAAATTCGTCTTGTAAGGAACTACGCGCTTGGAGTAAAGGAAAGTCAAA  
CTCGAGTTGCGATTTTTGTCTTTATTCAAGAAAAATTTGGATACAACTTAAAAATAAAC  
CCAGGTTTTAAGTTAAAACTTCGTTGCTCTCATATTCAAATGCTTAAAAATAAGGAAAT  
TAACATTTTAAGCAGCTTACCAAGTCATCACCTATCCCCTTCAAATACTCCCCAGCTTT  
GTTGATGCATTTTTGCCACCGTTTCTTCAATTGGAAGAAAACTGTTGGAAATCCTCAGG  
TTTGAATGATCGCAATTCCTTCAAGATGTTCTTGAATTTCCGGAACGGTTTGAAAACG  
TCGACCTTCCAGGTAGATTTAAGTCGCGGAAATAAGAAAAATTACACGAAGCCAGGTC  
AGGTGAATAAGGGGAATGAGGGAGGACACTCATGGCATTCTTGACAAAAATTCGCGAAT  
TTGGAGGGATGCATGGGCAGGTGCATTATCGTGATGCAGAAACCAGGAATT

--



>Btmar1.9.18\_gi-1092454896-gb-MAMS01000189\_1-:1233064-1233598  
gi-1092454896-gb-MAMS01000189.1-:1233064-1233598 Bemisia tabaci isolate MEAM1 Scaffold597,  
whole genome shotgun sequence 535 bp

TACGAGGGCTGTCCCAAAGAAACCGGACTTTTGTCTAGAAAGGCGAACCGAGCGTTGTA  
ATGAAGTTTTCTTGGGCTTGTGGGAAGCTGATAAGGTACTGGAGATGCTTGTTTTTACA  
GAATGCAAAAATTCGTCTTGGAAGGAACTACAAGCTTTGGAATAAAGGAAAGTCAAAC  
TCGAGTTGCGATTTTTGTCTTTATTTCAAGAAAAATTTGGATACAACCTAAAAAAAACC  
CAGGTTTTAAGTTAAAACTTCGTTGCTCTCTTATTCAAATGCTTAAAAATAAGGAAATT  
AACATTTTAAGCAGCTTACCAAGTCATCACCAATTCCCTTCAAATACTCGCCAGCTTTG  
TCGATGCATTTTTGCCACCGTTTCTTCAATTGGAAGAAACACTGTTGAAAATCCTCAGGT  
TTGAATGATCGCAATTCCTTCAAGGTGCTCTCTTGAATTTCCGGAATGGTTTGAAAACGT  
CGACCTTTCAAGGTAGTTTTAGGTCGTGGAAATAAGAAAAATCACACGGAGCCA

>Btmar1.9.19\_gi-1092454896-gb-MAMS01000189\_1-:1234530-1235067  
gi-1092454896-gb-MAMS01000189.1-:1234530-1235067 Bemisia tabaci isolate MEAM1 Scaffold597,  
whole genome shotgun sequence 538 bp

TACGAGGGCTGTCCCAAAGAAACCGGACTTTTGTCTAGAAAGGCGAACCGAGCTTCGTA  
ATGAAGTTTTCTTGGGCTTGTGGAAAGCTGATAAGCTACTGGAGATGCTTGTTTTTACA  
GAATGCAAAAATTCGTCTTGGAAGGAACTACAAGCTTTGGAATAAAGGAAAGTCAAAC  
TCGAGTTGCGATTTTTGTCTTTATTTCAAGAAAAATTTGGATACAACCTAAAAAAAACC  
CAGGTTTTAAGTTAAAACTTCGTTGCTCTCTTATTCAAATGCTTAAAAATAAGGAAATT  
AACATTTTAAGCACCTTACCAAGTCATCACCTATTCCCTTCAAATACTCGCCAGCTTTG  
TCGATGCATTTTTGCCACCGTTTCTTCAATTATTGGAAGAAACACTGTTGGAATCCTCA  
GGTTTGAATGATCGCAATTCCTTCAAGGTGCTCTCTTGAATTTCCGGAATGGTTTGAAAA  
CGTCGACCTTTCAAGGTAGTTTTAGGTCGTGGAAATAAGAAAAATCACACGGAGCCA

--

>Btmar1.9.20\_gi-1092455188-gb-MAMS01000105\_1-:4638516-4639063  
gi-1092455188-gb-MAMS01000105.1-:4638516-4639063 Bemisia tabaci isolate MEAM1 Scaffold343,  
whole genome shotgun sequence 548 bp

TACGAGGGCTGTCCCAAAGAAACCGGACTTTCGTCTAGAAAGGCGAACCGAGCGTCGTA  
ATGAAGTTTTCTTGGGCTTGTGGAAAGCTGATAAGCTACTGAAGATGCTTGTTTTTACA

GAATGCAAAAATTCGTCTTGGTAAGGAACTACACGCTTTGGAATAAAGGAAAGTCAAAC  
TCGAGTTGCGATTTTTGTCTTTATTTCAAGAAAAATTTAGATACAACTTTAAAAAACCC  
AGGTTTTAAGTTAAAACTTCGTTGCTCTCTTATTCAAATGCTTAAAAATAAGGAAATTA  
ACATTTTAAGCAGCTTACCAAGTCTAACCTATCCCCTTCAAATACTCGCCAGCTTTGT  
CGATGCATTTTTGCCACCGTTTCTCAATTGGGAGAAACGCTGTTGGAAATCCTCAGATT  
TGAATGATCGCAATTCCTACAAGGTGCACGTGTTCTTGAATTTCCGGAATAGTTTGAA  
AATGTCGACCTTTCAAGGTAGATTTAAGTCGTGGAAATAAGAAAAAATCACACGGAGCCA  
GGTCAGGT

--

>Btmar1.9.21\_gi-1092455312-gb-MAMS01000080\_1-:2656370-2657019  
gi-1092455312-gb-MAMS01000080.1-:2656370-2657019 Bemisia tabaci isolate MEAM1 Scaffold28,  
whole genome shotgun sequence 650 bp

TACGAGGGCTGTCCCAAAGAAACCGGACTTTTGTCTAGTAAGGCGAACCGAGCGTTGTA  
ATGAAGTTTTCTTAGGCTTGTTGAAAGCTGATAAGCTATTGGAGATGCTTGTTTTTACA  
GAATGCAAAAATTCGTCTTGGTAAGGAACTACACGCTTTGGAGTAAAGGAAAGTCAAAC  
TCGAGTTGCGATTTTTGTCTTTATTTCAAGGAAAATTTGGATACAACCTAAAAATAAACCC  
CAGGTTTTAAGTTAAAACTTCGTTGCTCTCTTATTCAAATGCTTAAAAATAAGGAAATT  
AACATTTTAAGCAGATTACTAAGTCATCACCTATCCCCTTCAAATACTCGCCAGCTTTG  
TTGATGCATTTTTGCCACCGTTTCTCAATTGGAAGAAAAACTGTTGGAAATCCTCAGGT  
TTGAATGATCGCAATTCCTTCAAGGTGTTCTTGAATGTCCGGAACGTTTGAAAACGT  
CGACCTTTCCAGGTAGATTTAAGTCGCGGAAATAAGAAAAAATTACACGAAGCCAGGTCA  
GGTGAATAAGGGGGATGAGGGAGGACACTCATGGCATTCTTGCACAAAATTCGCGAATT  
TAGAGGGATGCATGGGCAGGTGCATTATCGTGATGCAGAAACCAGGAATT

--

>Btmar1.9.22\*\_gi-1092454629-gb-MAMS01000265\_1-:482082-482738  
gi-1092454629-gb-MAMS01000265.1-:482082-482738 Bemisia tabaci isolate MEAM1 Scaffold1003,  
whole genome shotgun sequence 657 bp

TACGAGGGCTGTCCCAAAGAAACCGGACTTTGGTCATAGAAGGCGAAGCAAGCGTCGTA  
ATGAAGTTTTCTTGGACTTGTTGAAAGCTGATAAGCTACTGGAGAAGCTTGTTTTTACA

GAATGCAAAAATTCGTCTTGGTAAGGAACTACACGCTTTGGAATAAAGGAAAGTCAAAC  
TCGAGTTGCGATTTTTGTCTTTATTTCAAGAAAAATTTGGATACAACCTAAAAAAACCC  
AGGTTTTAAGTTCAAAACCTTCGTTGCTCTCTTATTCAAATGCTTAAAAATAAGGAAATTA  
ACATTTTAAGCAGCTTACCAAGTCATCAATTATCCCCTTCAAATACTCGACAGCTTATT  
GTCGATGCATTTTTGCCACCGTCTCTTCAATTGCAAGAAACACTGTTGGAAATCCTCAGG  
TTTGAATAATCGCAATTCCTTTAAGGTGTTCTCTTGAATTTCCGGAATGGTTTGAAAACG  
TCGACCTTTCAAGGTAGATTTAAGTCGTGGAAATAAGAAAAATCACACGGAGCCAGGTC  
AGGTGAATAAGGGGGATGAGGGAGGACACTCATGGCATTCTTTGCACAAAATTCGCGAAT  
TTGGAGGGATGCGGATGCATGGGCAGGTGCATTATCGTGATGCAGAAACCAGGAATT

--

>Btmar1.9.23\_gi-1092445037-gb-MAMS01004535\_1-:106080-106721  
gi-1092445037-gb-MAMS01004535.1-:106080-106721 Bemisia tabaci isolate MEAM1 Scaffold2663,  
whole genome shotgun sequence 642 bp

TACGAGGGCTGTCCCAAAGAAACCGGACTTTTGTATAGAAGGCGAACCGAGCGTTGTA  
ATGAAGTTTTCTTGGGCTTGTTGAAAGCTGATAAGCTACTGGAGATGCTTGTTTTTACA  
GAATGCAAAAATTCGTCTTGGTAAGGAAATTACACGCTTTGGAATAAAGGAAAGTCAAAC  
TCGGGTTACGATTTTTGTCTTTATTTCAAGAAAAATTTGGATACAACCTACAAAAACCC  
AGGTTCTAAGTGAAAACTTCTTTGCTCTCTTATTCAAATGCTTAAAAATAAGGAAATTA  
ACATTTTAAGCAGCTTACCAAGTAATCACCTATCCCCTTCAAATACTCGCCAGCTTTGT  
CGATGCATTTTTGCCACCGTTTCTTCAATTAGAAGAAACACTGTTGGAAATCCTCAGGTT  
TGAATGATCGCAATTCCTTCAAGGTGTTCTCTTGAATTTCCGGAATGATTTGAAAACGTC  
AACTTTTCAAGGTAGATTTAAGTCGTGGAAATAAGAGAAAATCACACGGAGCCAAGTCAG  
GTGAATATGGGGGATGAGGGAGGACACTCATGGCATTCTTTGCACAAAATTCGCGAATTT  
GGAGGGATGCATGGGCAGGTGCATTATCGTGATGCAGAAACC

--

>Btmar1.9.24\_gi-1092454801-gb-MAMS01000208\_1-:2515007-2515656  
gi-1092454801-gb-MAMS01000208.1-:2515007-2515656 Bemisia tabaci isolate MEAM1 Scaffold649,  
whole genome shotgun sequence 650 bp

TACGAGGGCTGTCCCAAAGAAACCGGACTTTTGTATAGAAGACGAACCGAGCGTCGTA

ATGAAGTTTTCTTGGGCTTGTTGAAAGCTGATAAGCTACTGGAGATGCTTGTTTTTACA  
GAATGCAAAAATTCGTCTTGTAAGGAACTACACGCTTGGAATAAAGGAAAGTCAAAC  
TCGAGTTGCGATTTTTGTCTTTATTTCAAGAAAAATTTGGATAAACTTAAAAATAAAC  
CAGGTTTTAAGTTAAAACTTCGTTGCTCTCTTATTCAAATGCTTAAAAATAAGGAAATT  
AACATTTTAGGCAGCTTGCCAAGTCATCACCTATCCCCTTCAAATACTCGCCAGCTTTG  
TCGATGCATTTTTGCCACCGTTTCTTCAATTGGAAGAAAACTGTTGGAAATCCACAGGT  
TTGAATGATCGCAATTTCTTCAAGGTGTTCTCTTGAATTTCCGGAATGGTTTGAAAACGT  
CGACCTTTCAAGGTAGATTTAAGTCGCGGAAATAAGAAAAAATTTACGGAGCCAGGTCA  
GGTGAATAAGGGGGATGAGGGAGGACACTCATGGCATTCTTGCACAAAATTCGCGAATT  
TGGAGGGATGCATGGGCAGGTGCATTATCGTGATGCAGAAACCAGGAATT

--

>Btmar1.9.25\_gi-1092454908-gb-MAMS01000185\_1:-551881-552422  
gi-1092454908-gb-MAMS01000185.1:-551881-552422 Bemisia tabaci isolate MEAM1 Scaffold591, whole  
genome shotgun sequence 542 bp

TACGAGGGCTGTCCCAAAGAAACCGGACTTTTGTATAGAAGGCGAACCGAGCGTTGTA  
ATGAAGTTTTCTTGGGCTTGTTGAAAGCTGATAAGCTACTGAAGATGCTTGTTTTTACA  
AAATGCAAAAATTCGTATTGGTAAGGAACTACACGCTTGGAATAAAGGAAAGTCGAAC  
TCGAGTTGCGATTTTTGTCTTTATTTCAAGAAAAATTTAGATTCAACTTTAAAAAACCC  
AGGTTTCAAGTTTAAACTTCGTTGCTCTCTTACTCAAATTTAAAAATAAGGAAATTAAC  
ATTTAAGCAGCTTCCAAGTCATCACCTACCCCTTCAAATACTCGCCAGCTTTGTCTG  
ATGCATTTTTGCCACCGTTTCTTCAATTGGGAGAAGCACTGTTGGAAATCCTCAGGTTTG  
AATGATCGCAATTTCTTATACAAGGTGTTCTCTTGGATTTCGGAATGGTTTGAAAACGTC  
GACCTTTCAAGGTAGATTTAAGTCGTGGAAATAAAAAAAATCACACGGAGCCAGGTCAG  
GT

--

>Btmar1.9.26\_gi-1092453732-gb-MAMS01000665\_1:-1732785-1733438  
gi-1092453732-gb-MAMS01000665.1:-1732785-1733438 Bemisia tabaci isolate MEAM1 Scaffold1145,  
whole genome shotgun sequence 654 bp

GTACGAGGGCTGTCCCAAAGAAACCGGACTTTTGTATAGAAGGCGAACCGAGCGTCGT

AATGAAGTTTTCTTGGGCTTGTTTGAAAGCTGATAAGCTACTGGAGATGCTTGTTTTAC  
AGAATGCAAAAATTCGTCTTGGTAAGGAACTACACGCTTTGGAATAAAGGAAAGTCAAA  
CTCGAGTTGCGATTTTTGTCTTTATTTCAAGAAAAATTTGGGTACAACCTTAAAAA  
CCCAGGTTTTAAGTTAAAACTTCGTTGCTCTCTTACTCAAATGCTTAAAAATAAGGAAA  
TTAACATTTTAAACAGCTTACCAAGTCATCACCAATCCCCTTCAAATACTCGCCAGCTT  
TGTCGATGCATTTTTGCCACCGTTTCTTCAATCGGAAGAACTGTTGGAAATCCTCAG  
GTTTGAATGATCGCAATTCCTTCAAAGTGCTCTTGAATTTCCGGAATGGTTTGAAAAC  
GTCGACCTTTCAAGGTAGATGTAAGTCGTGGAAATAAGACAAAATCATACGGAGCCAGGT  
CATAGGTGAATGAGGGGGATGAGGGAGGACACTCATGGCATTCTTTGCACAAAATTCGCG  
AATTTGGAGGGATGCATGGGCAGGTGCATTATCTTGATGCAGAAACCAGGAATT

--

>Btmar1.9.27\_gi-1092425936-gb-MAMS01019602\_1-:330834-331369  
gi-1092425936-gb-MAMS01019602.1-:330834-331369 Bemisia tabaci isolate MEAM1 Scaffold946, whole  
genome shotgun sequence 536 bp

GTACGAGGGCTGTCCCAAAGAAACCGGACTTTTGTATAGAAGGCGAACCGAGCGTCGT  
AATGAAGTTTTCTTGGGCTTGTTTGAAAGCTGATAAGCTATTGGAGATGCTTGTTTTAC  
AGAATGCAAAAATTCGTCTTGGTAAGGAACTACACGCTTTGGAATAAAGGAAAGTCAAA  
CTCGAGTTGCGATTTTTGTCTTTATTTCAAGAAAAATTTGGATACAACCTTAAAAATAAAC  
CCAGGTTTTAAGTTAAAACTTCGTTGCTCTCTTATTCAAATGCTTAAAAATAAGGAAAT  
TAACATTTTAAGCAGCTTACCAAGTCATCACCTATCCCTTTCAAATACTCGCCAGCTTT  
GTCGATGCATTTTTGCCACCGTTTCTTCAATTGGAAGAAAACTGTTGGAAATCCTCAGG  
TTTGAATGATCGCAATTCCTTCAAGGTGTTCTCTTGAATTTCCGGAATGGTTTGGAACG  
TCAACCTTTCAAGGTAGATTTAAGTCGTGGAAATAAGAAAAAATCACACGGGGCCA

>Btmar1.9.28\_gi-1092455079-gb-MAMS01000138\_1-:787882-788424  
gi-1092455079-gb-MAMS01000138.1-:787882-788424 Bemisia tabaci isolate MEAM1 Scaffold455, whole  
genome shotgun sequence 543 bp

TACGAGGGCTGTCCCAAAGAAACCGGACTTTTGTATAGAGGGCGAACCGAGCGTCGTA  
ATGAAGTTTTCTTAGGCTTGTTTGAAAGCTAATAAGCTACTGAATATGCTTGTTTTACA

GAATGCAAAAATTCGTATGGGTAAGGAACTACACGCTTTGGAATAAAGGAATGTCAAAC  
TCAAGTTGCGATTTTTGTCTTTATTTCAAGACAAATTTAGATACAACTTAAAAAACCCA  
GGTTTTAAGTTAAAACTTCGTTGCTCTCTTATTCAAATGCTTAAAAATAAGGAAATTAA  
CATTTTATAAGCAGCTTACCAAGTCATCACCTATCCCCTTCAAATACTTGCCAGCTTTG  
TTGTTGCATTTTTGCCACCGTCTCTTCAATTGGGAGAAACACTGTTGGAAATCCTCAGAT  
TTGATTGATCGCAATTCACAGGGTGTTGCTTGGATTTCGGAATGGTTTGAAAACGT  
CGACCTTTCAAGGCAAATTTAAGTCGTGGAAATAAGAAAAATCACACGGAGCCAGGTCA  
GGT

--

>Btmar1.9.29\_gi-1092435905-gb-MAMS01009633\_1-:569542-570191  
gi-1092435905-gb-MAMS01009633.1-:569542-570191 Bemisia tabaci isolate MEAM1 Scaffold4818,  
whole genome shotgun sequence 650 bp

TACGAGGGCTGTCCCAAAGAAACCGGACTTTTGTATAGAAGGCGAACCGAGCGTCGTA  
ATGAAGTTTTCTTGGGCTTGTTGAAAGCTGATAAGCTACTGGAGATGCTTGTTTTACA  
GAATGCAAAAATTCGTCTTGGAAGGAACTACACGCTTTGGAGTAAAGGAAAGTCAAAC  
TCGAGTTGCGATTTTTGTCTTTATTTCAAGAAAAATTTGGATACAACTTAAAAATAAACC  
CAGGTTTTAAGTTAAAACTTCGTTGCTCTCTTATTCAAATGCTTAAAAATAAGGAAATT  
AACATTTTAAGCAGATTACCAAGTCATCACCTATCCCCTTCAAATACTCGCCAGCTTTG  
TTGATGCATTTTTGCCACCGTTTCTTCAATTGGAAGAAAAACTGTTGGAAATCCTCAGGT  
TTGAATGATCGCAATTCCTTCAAGGTGTTCTTGAATTTCCGGAACGGTTTGAAAACGT  
CGACCTTTCCAGGTAGATTTAAGTCGCGGAAATAAGAAAAAATTACACGAAGCCAGGTCA  
GGTGAATAAGGGGGATGAGGGAGAACTCATGGCATTCTTGCACAAAATTCGCGAATT  
TGGAGGGATGCATGGGCAGGTGCATTATCGTGATGCAGAAACCAGGAATT

--

>Btmar1.9.30\_gi-1092436353-gb-MAMS01009185\_1-:91991-92626  
gi-1092436353-gb-MAMS01009185.1-:91991-92626 Bemisia tabaci isolate MEAM1 Scaffold4622, whole  
genome shotgun sequence 636 bp

TACGAGGGCTGTCCCAAAGAAACCGGACTTTTGT CATAGAAGGCGAACCGAGCGTTGTA  
ATGCAGTTTTCTTGGGCAAGTTTGAAAGCTGATAAGCTACTAAAGATACTTGTTTTTACA  
GAATGCATAAATTCGTCTTGTAAGGAACTGCACGCTTTGGAATAAAGGAAAAGTCAAAC  
TCGAGTTGCGATTTTTGTCTTTATTTCAAGAAAAATATAGATACAACCTAAAAAACCCCT  
GGTCTTAAGTTGAAAACCTTCGTTGTTCTCTTCAAATGCTTAAAAAAAAGAAAATTA  
ACATTTTAAGCAGCTTACCAAGTCATCACCTACCCCTTCAAATACTCGCCAGCTTTAT  
CGATGCATTTTTGCCACCGTTTCTCAATAGGGAGAAACACTGTTGGAAATCCTCAGGTT  
TGAATGATCGCAATTCCTCAAGGTGCTCTTGAATTTCCGGAATGGTTTGAAACGTC  
GACCTTTCAAGGTAGATTTAAGTCGTGGAAATAAGGAAAATCACACGGAGCCAGGTCAGA  
TGAATAAGGGGGATAAGGGAGGACATTCATGGCATTCTTGCACAAAATTCGCGAATTTG  
GAGGGATGCATGGGCAGGTGCATTATCGTGATACAG

--

>Btmar1.9.31\_gi-1092453894-gb-MAMS01000592\_1:-10001-10537  
gi-1092453894-gb-MAMS01000592.1:-10001-10537 Bemisia tabaci isolate MEAM1 Scaffold11199, whole  
genome shotgun sequence 537 bp

TACGAGGGCTGTCCCAAAGAACTGGACTTTGGTCATAGAAGGCGAACCGAGCGTCGTA  
ATGAAGTCTTCTTGGGCTTGTTTGAAAGTTGATAAGCTACTGGAGATGCTTGTTTTTACA  
GAATGCAAAAATTCGTCTTGTAAGGAACTACACGCTTTGGAATAAAGGAAAAGTCAAAC  
TCGAGTTGCGATTTTTGTCTTTATTTCAAGAAAAATTTGGATACAACCTAAAAAAAAC  
CCAGGTTTTATGTTAAAACTTCGTTGCTCTTATTCAAATGCTTAAAAATAAGGAAAT  
TAACATTTTAAGCAGCTTACCAAGTCATCACCTATCCCCTTCAAATACTCGCCAACCTT  
TGTCGATGCATTTTTGCCACCGTTTGTTCAATTGGAAGAAACACTGTTGGAAATCCACAG  
GTTTGAATGATCGCAATTCCTCAAGGTGTTCTTGAATTTCCGGAATGGTTTGAAAAC  
GTCGACCTTTCAAGGTAGACTTAAGTCGTGGAAATAAAAAAAATCATTGAGGCCA

--

>Btmar1.9.32\_gi-1092440209-gb-MAMS01006820\_1:-57075-57609  
gi-1092440209-gb-MAMS01006820.1:-57075-57609 Bemisia tabaci isolate MEAM1 Scaffold3609, whole  
genome shotgun sequence 535 bp

TACGAGGGCTGTCCCAAAGAAACCGGACTTTTGT CATAGAAGGCGAACCGAGCTTCGTA

ATGAAGTTTTCTGGGTTTGTGTTGAAAGCTGATAAGCTACTGGAGGTGCTTGTTTTTACA  
GAATGCAAAAATTCATCTTGGTAAGGAACTACACACTTTGGAATGAAGGAAAGTCAAAC  
TCGAGTTGCGATTTTTGTCTTTATTTCAAGAAAAATTTGGATACAACCTAAAAATAAACCC  
CAGGTTTTAAGTTAAAACTTCGTGGCTCTCTTATTCAAATGCTTAAAAATAAGGAAATC  
AACATTTTAAGCAGCTTACCAAGTCATCACCTATCCCCTGCTAAATACTCGCTAGCTTTG  
TCGATGCATTTTTGCCACCGTTTCTTCAATTGGAAGAAACACTGTTGGAAATCCTCAGAT  
TTGAATGATCGCAATTCCTTCAAGGTGTTCTCTTGAATTTCCGGAATGGTTTGAAAACGT  
CGACCTTCCAAGGTAGATTTAAGTCGTGGAAATAAGAAAAAATCACACGGAGCCA

--

>Btmar1.9.33\_gi-1092450413-gb-MAMS01002223\_1-:18346-18881  
gi-1092450413-gb-MAMS01002223.1-:18346-18881 Bemisia tabaci isolate MEAM1 Scaffold17384, whole  
genome shotgun sequence 536 bp

TACGAGGGCTGTCCCAAAGAAACCGGACTTTTGTCTAGAAAGGCGAACCGAGCGTGGTA  
ATGAAGTTTTCTGGGGTTGTTGAAAGCTGATAAGCTACTGGAGATGCTTGTTTTTACA  
GAATGCAAAAATTCGTCTTAGTAAGGAACTACACGCTTTGGAATAAAGGAAAGTCAAAC  
TCGAGTTGCGATTTTTGTCTTTATTTCAAGAAAAATTTGGATACAACCTAAAAATAACCC  
AGGTTTTAAGTTAAAACTTCGTTGTTCTCTTATTCAAATGCTTAAAAATAAGGAAATTA  
ACATTTTAAGCAGCTTACCAAGTCATCACCTATCCCCTTCAAATACTCGCCAGCTTTGT  
CGATGCATTTTTGCCACCGTTTCTTCAATTGAAAGAAACACTGTTGGAAATCCACAGGTT  
TGAATGATCGCAATTCCTTCAAGGTGTTCTCTTGAATTTCCGGAATGGTTTGAAAACGTC  
GACCCTTCAAGGTAGATTTAAGTCGTGGAAATAAAAAAAAAAATCACACGGAGCCA

--

>Btmar1.9.34\_gi-1092428161-gb-MAMS01017377\_1-:14385-14919  
gi-1092428161-gb-MAMS01017377.1-:14385-14919 Bemisia tabaci isolate MEAM1 Scaffold82463, whole  
genome shotgun sequence 535 bp

TACGAGGGCTGTCCCAAAGAAACCGGACTTTTGTCTAGAGGGCGAACCGAGCGTCGTA  
ATGAAGTTTTCTGGGCTTGTTGAAAGCTGATAAGCTACTGAAGATGCTTGTTTTTACA  
GAATGCAAAAATTCGTATTGTTAAGGAACTACACGCTTTGGAATAAAGGAAGGTCAAAC  
TCGAGTTGCGATTTTTGTCTTTATCTCAAGAGATACAACCTAAAAAAAACCCAGGTTTC  
AAGTTAAAACTTCGTTGCTCTCTTATTCAAATGCTTAAAAATAAGAAAATTAACATTTT



AAGCAGCTTACCAAGTCATCACCTATCCCCTTCAAATACTTGCCAGCTTTGTCGATGCA  
GTTTTGCCACCGTTTCTTCAATTGGGAGAAACACTGTTGGAAATCCTCAGATTTGATTGA  
TCGCAATTCCTACAGGGTGTCTCTTGGATTTCGGAATGGTTTGAAAACGTCGACCTTT  
CAAGGTAAATTTAAGTCGTGGAAATAAGAAAAAATCACACGGAGCCAGGTCTGGT

>Btmar1.10.1\_gi-1092455158-gb-MAMS01000115\_1-:2858892-2859434  
gi-1092455158-gb-MAMS01000115.1-:2858892-2859434 Bemisia tabaci isolate MEAM1 Scaffold374,  
whole genome shotgun sequence 543 bp

ACCTGACCTGGCTCCGTGTGATTCTTTCTTATTTCCACGACTTAAATCTGCCTTGAAAGG  
TCGGCGTTTTCAAACATTCCAGAAATTCAAGAGAACACAAGGAATTGCGATCATTCAA  
TCTGAGGATTTCCAACAGTGTCTCTCCCAATTGAAGAAATGGTGGCAAAAATGCATCAAC  
AAAGCTGGCGAGTATTTTGAAGGGGATAGGTGATGACTTGGTAAGCTGCTGAAAATGTTA  
ATTCCTTATTTTTAAGTATTTGAATAAGAGAGCAACGAAGTTTTTAACCTAAAACCTGA  
GTTTTTTTTTAAGTTGTACCTAACTAAATTTTTCTTGAAATAAAGACAAAAATCGCAACT  
CGAGTTTGACTTTCCTTATTCCAAAGCGTGTAGTTTCCTTACCAAGACGAATTTTGGCA  
TTCTGTAAAAACAAGCATCTTCAGTAGCTCATCAGCTTTCAAACAAGCCCAAGAAAACCTT  
CATTACAACGCTCGGTTTCGCTTCTATGACAAAAGTCCGGTTTCTTTGGGACAGCCCTC  
GTA

--

>Btmar1.10.2\*\_gi-1092455599-gb-MAMS01000015\_1-:2613173-2613875  
gi-1092455599-gb-MAMS01000015.1-:2613173-2613875 Bemisia tabaci isolate MEAM1 Scaffold130,  
whole genome shotgun sequence 703 bp

GAGACGATTACGCGAAAATGTCCGTAGAAAAGGGCCCGAGCTTTGGAGAGAGAATTCCTG  
GTTTCTGCATCACGATAATGCACCTGCCCATGCATCCCTCCAAAATTCGCGAATTTTGTG  
CAAAGAATGCCATGAGTGTCTCCTTCATCCCCCTTATTCACCTGCCCTGGTTCCCCGTG  
ATTTTTCTTATTTCCGCGACTTAAATCTACCTGAAAGGTCGACGTTTTCAAACCATTC  
CGGAAATTCAAGAGAACGCCTGAAGGAATTGCGATCATTCAAACCTGAGGATTTCCAAC  
AGTGTTTCTCCGCATTGAAGAAACGGTGGCAAAAATGCATCGACAAAGCTGGCGAGTATT  
TTGAAGGGGATAGGTGATGACTTGGTAAGCTGCTTAAAATGTTAATTCCTTATTTTTAA

GCATTTGAAGAAGAGAGCAACGAAGTTTTTAACTTAAACCTGGGTTTTTGTAAAGTTG  
TATCTAAATTTTCTTGAAATAAAGACAAAAATCGCAACTCGAGTTTGACTTTCCTTTAT  
TCCAAAGCGTGTAGTTCCTTACCAAGACGAATTTTGCATTCCGTAAAAACAAGCATCT  
TTAGTAGCTTATCAGCTTTCAAACAAGCCCCAGAAACTTCATTACGACGGTCGGTTCGC  
CTTCTATGACAAAAGTCCGGTTTCTTTGGGACAGCCCTCGTA

--

>Btmar1.10.3\_gi-1092437712-gb-MAMS01008062\_1-:1632397-1632934  
gi-1092437712-gb-MAMS01008062.1-:1632397-1632934 Bemisia tabaci isolate MEAM1 Scaffold4122,  
whole genome shotgun sequence 538 bp

ACCTGACCTGGCTCCGTGTGATTTATTCTTATTCCACGACTTTTACCTTGAAAGGTCG  
ACGTTTTCAAACCATTCGAAAATTCAAGAGAACACCTGTAGGAATTGCGATCATTCAA  
ATCTGAGGATTTCCAACAGTGTTTTCTCCAATTGAAGAAACGGTGGCAAAAATGAATCG  
ACAAAGCTGGCGAGTATTTGAAGGGGATAGGTGATGACTTGGAAGCTGCTTAAATGT  
TAATTCCTTATTTACAAGCATTTGAATGAGAGCAACGAAGTTTTTAACTTGAAACCTCG  
GTTTTTTTTAAGTTGTATCTAAAGTCTTGAAATAAAGACAAAAATCGCAACTCGAGTTTG  
ACTTTCCTTTATTCCAAAGCGTGTAGTTTCCTTACCAAGACGAGTTTTTGCATTCTGTAA  
AAATAAGCATCTTCAGTAGCTTATCAGCTTTCAAACAAGCCAAAGAAACTTCATTACGA  
CGCTCGGTGATCGCCTTCTATGACAAAAGTCCGGTTTCTTTGGGACAGCCCTCGTAC

--

>Btmar1.10.4\_gi-1092428515-gb-MAMS01017023\_1-:2889888-2890415  
gi-1092428515-gb-MAMS01017023.1-:2889888-2890415 Bemisia tabaci isolate MEAM1 Scaffold809,  
whole genome shotgun sequence 528 bp

TGGCTCCGTGTGATTTTTTCTTATTCCACGACTTAAATCTACCTTGAAAGGTCGACGTT  
TTCAAACCATTCAGAAATTCAAGAGAACACCTCGAAGGAATTGCTATCGTTCAAACCTG  
AGGATTTCCAACAGTGTTGCTTCCAATTGAAGAAACGGTGGCAAAAATGCATCGACAAAAG  
CTTGCGAGTATTTTGAAGGGGATAGGTGATGACTTGGAAGCTGCTTAAATGTTAATTT  
CCTTATTTTTAAGCATTTGAATGAGAGAGCAACGAAGTTTTTAACTTAAACCTGGGTTT  
TTTTAAGTTGTATCCAAATTTTTCTTGAAATAAAGACAAAAATCGCAACTCGAGTTTGAC

TTTCCTTTATTCCAAAGCGTGTAGTTTCCTTACCAAGACGAATTTTGCATTCTGTAAAA  
ACAAACATCTCCAGTAGCTTATCAGCTTTCAAACAAGCCCAAGAAAACTTCATTACGACG  
CTCGGTTCGTCTTCTATGACGAAAGTCCGGTTTCTTTTAGGACAGCCC

>Btmar1.10.5\_gi-1092449997-gb-MAMS01002403\_1-:899725-900263  
gi-1092449997-gb-MAMS01002403.1-:899725-900263 Bemisia tabaci isolate MEAM1 Scaffold1805,  
whole genome shotgun sequence 539 bp

ACCTGACCTGGCTCCGTGTGATTTTTCTTATTTCCACGACTTAAATCTACCTTGAAAGG  
TCGACGTTTTCAAACCATTCCGGAAATTCAAGAGAACACCTTGTAGGAATTGGGATCATT  
CAAATCTGAGGATTTCCGACATTGTTTCTCCCAGTTGAAGAACAGTGGAATAATGCATC  
GACAAAGCTGGCGAGTATTTGAAGGGGATAGGTGATGACTTAGTGTAAGCTGCTTAAAA  
TTTTAATTTCTTATTTTTAAGCATTGAATAAGAGAGCAACGAAGTTTTTAACCTAAAA  
CCTGGGTTTTTTAAGTTGTATCTAAATTCTTGAAATAAAGACAAAAATCGCAACTCGAG  
TTTGACTTTCCTTTATTCCAAAGTGTGTAGTTTCCTTACCAAGACGAATTTTGCATTCT  
GTAAAAACAAGCATCTTCAGTAGCTTATCAGCTTTCAAACAAGCCCAAGAAAACTTCATT  
ACAACACTCGGTTTCGCTTCTATAAGAAAAGTCCGGTTTCTTTGGGACAGCCCTGGTA

--

>Btmar1.10.6\_gi-1092450877-gb-MAMS01001951\_1-:639028-639676  
gi-1092450877-gb-MAMS01001951.1-:639028-639676 Bemisia tabaci isolate MEAM1 Scaffold16276,  
whole genome shotgun sequence 649 bp

AATTCCTGGTTTCTGCATCACGATAATGCACCTGCCCATGCATCCCTCCGAATTCGCGAA  
TTTTGTGCAAAGAATGCCGTGAGTGTCTCCCTCATCCCCCTTATTCACCTGACCTGACT  
CCGTGTGATTTTTTTTATTTCCACGACTTAAATCTACCTTGAAAGGTCGACGTTTCCAAA  
CCATTCCGGAAATTCAAGAGAACACCTTGAAGGAATTGCGATCATTCAAACCTGAGGATT  
TCCAACAGTTTTTCTTCCAATTGAAGAAACGGTGGCAAAAATGCATCGACAAAGCTGGCG  
AGTATTTTGAAGGGGATAGGTGATGACTTGTAAGCTGCTTAAATGTTAATTCCTTAT  
TTTTAAGCATTGAATAAGAGAGCAACGAAGTTTTTAACCTAAAACCTGGGTTTATTTTT  
AAGTTGTATCCAAATTTTTCTTGAAATAAAGACAAAAATCGCAACTCGAGTTTGACTTTC  
CTTTATTCCAAAGCGTGTAGTTTCCTTACCAAGACGAATTTTGCATTCTGTAAAAACAA

GCATCTCCAATAGCTTATCAGCTTTCAAACAAGCCCAAGAAAACCTTCATTACGACGCTCG  
GTTTCGCTTCTATGACAAAAGTCCGGTTTCTTTGGGACAGCCCTCGTA

--

>Btmar1.10.7\_gi-1092453380-gb-MAMS01000828\_1-:71043-71697  
gi-1092453380-gb-MAMS01000828.1-:71043-71697 Bemisia tabaci isolate MEAM1 Scaffold1195, whole  
genome shotgun sequence 655 bp

AATTCCTGGTTTCTGCATCACGATAATGCACCTGCCCATGCATCCCTCCAAATTCGCGAA  
TTTTGCGCAAAGAATGCCATGAGTGTCTCCCTCATCCCCCTTATTCACCTGACCTGGCT  
CCGTGTGATTTTTCTTATTTCCACGACTTAAATCTACCTTGAAAGGTCGACGTTTTCAA  
ACCATTCGGAAATTCAAGAGAACACCTTGAAGGAATTGCGATCATTCAAACCTGAGGAT  
TTCCAACAGTGTTCCTCAATTGAAGAAACGGTGCGGCAAAAATGCATCGACAAAGCTG  
GCGAGTATTTGAAGGGGATAGGTGATGACTTGGTAAGCTGCTTAAAATGTAAATTTCTT  
CATTTTAAAGCATTTGAATGAGAGAGCAACGAAGTTTTTAACTTAAAACCTGGGTTTATT  
TTTTTAAAGTTGTATCCAAATTTTTTTGAAATAAAGACAAAAATCGCAACTCGAGTTTG  
ACTTTCCTTTATTCCAAAGCGTGTAGTTTCCTTACCAAGACGAATTTTGCATTCTGTAA  
AAACAAGCATCTCCAGTAGGTTATCAGCTTTCAAACAAGCCCAAGAAAACCTTCACTACGA  
CGCTCGGTTTCGCTTCTATGACAAAAGTCCGGTTTCTTTGGGACAGCCCTCGTA

--

>Btmar1.10.8\_gi-1092454872-gb-MAMS01000195\_1-:4061330-4061979  
gi-1092454872-gb-MAMS01000195.1-:4061330-4061979 Bemisia tabaci isolate MEAM1 Scaffold613,  
whole genome shotgun sequence 650 bp

AATTCCTGGTTTCTGCATCACGATAATGCACCTGCCCATGCATCCCTCCAAATTCGCGAA  
TTTTGTGCAAAAATGCCGTGAGTGTCTCCCTCATCCCCCTTATTCACCTGACCTGACT  
CCGTGTGATTTTTCTTATTTCCACGACTTAAATCTACCTTGAAAGGTCGACGTTTCAA  
ACCATTCGGAAATTCAAGAGAACACCTTGAAGGAATTGCGATCATTCAAACCTGAGGAT  
TTCCAACAGTTTTTCTTCAATTGAAGAAACGGTGGCAAAAATGCATCTACAAAACCTGGC  
GAGTATTTGAAGGGGATAGGTGATGACTCGGTAAGCTGCTTAAAATGTAAATTTCTTA  
TTTTTAAAGCATTTGAATAAGAGAGCAACGAAGTTTTTAACTTAAAACCTGGGTTTATTTT  
TTAGTTGTATCCAAATTTTTCTTGAATAAAGACAAAAATCGCAACTCGAGTTTGACTTT  
CCTTTATTCCAAAGCGTGTAGTTTCCTTACCAAGACGAATTTTGCATTTTGTA AAAACA

AGCATCTCCAATAGCTTATCAGCTTTCAAACAAGCCCAAGAAAACCTTCATTACGACGCTC  
GGTTCGCCTTCTATGACAAGAGTCCGGTTTCTTTTGGGACAGCCCTCGTA

--

>Btmar1.10.9\_gi-1092454837-gb-MAMS01000204\_1-:186215-186756  
gi-1092454837-gb-MAMS01000204.1-:186215-186756 Bemisia tabaci isolate MEAM1 Scaffold64, whole  
genome shotgun sequence 542 bp

ACCTGACCTGGCTCCGTGTGATTTTTCTTATTTCCACGACTTAAATTTACCTTGAAAGG  
TCGACGTTTTCAAACCATTCGGAAATCCAAGAGAACACCCTGTAGGAATTGCGATCAAT  
CAAATCTGAGGATTTCCAACAGTGTTTCTCCCAATTGAAGAAACGGTGGCAAAAATGCAT  
CGACAAAGCTGGCAAGTATTTGAAGGGGATAGGTGATGACTTGGTAAGCTGCTTAAAT  
GTTAATTTCTTATTTTTAAGCATTTGAATAAGAGAGCAACGAAGTTTTTAACTTAAAC  
CTGGGTTTTTTTAAAGTTGTATCTAAATTTGTCTTGAGATGAAGACAAAATCGCAACTC  
GAGTTTGACTTTCCTTTATTCCAAAGCGTGTAGTTTCCTTACCAATACGAATTTTTCAT  
TCTGTAAAAACAAGCATCTTCAGTAGCTTATCAGCTTTCAAACAAGCCCAAGAAAACCTC  
ATTACGACGCTCGGTTCGCCCTCTATGACAAAAGTCCGGTTTCTTTTGGGACAGCCCTCG  
TA

--

>Btmar1.10.10\_gi-1092434463-gb-MAMS01011075\_1-:328156-328805  
gi-1092434463-gb-MAMS01011075.1-:328156-328805 Bemisia tabaci isolate MEAM1 Scaffold5453,  
whole genome shotgun sequence 650 bp

AATTCCTGGTTTCTGCATCACGATAATGCACCTGCCCATGCATCCCTCCGAATTCGCGAA  
TTTTGTGCAAAGAATGCCGTGAGTGTCTCCCTCATCCCCCTTATTCACCTGACCTGACT  
CCGTGTGATTTTTTTTTATTTCCACGACTTAAATCTACCTTGAAAGGTCGACGTTTCAA  
ACCATTCCGGAAATTCAAGAGAACACCTTGAAAGGAATTGCGATCATTCAAACCTGAGGAT  
TTCCAACAGTTTTTCTTCCAATTGAAGAAACGGTGGCAAAAATGCATCGACAAAGCTGGC  
GAGTATTTTGAAGGGGATAGGTGATGACTTGGTAAGCTGCTTAAATGTTAATTTCTTA  
TTTTTAAGCATTTGAATAAGAGAGCAACGAAGTTTTTAACTTAAACGTGGGTTTATTTT  
TAAGTTGTATCCAAATTTTCTTGAAATAAAGACAAAATCGCAACTCGAGTTTGACTTT  
CCTTTATTCCAAAGCGTGTAGTTTCCTTACCAAGACGAATTTTGCATTCTGTAAAAACA  
AGCATCTCCAATAGCTTATCAGCTTTCAAACAAGCCCAAGAAAACCTTCATTACGACGCTC

GGTTCGCCTTCTATGACAAGAGTCCGGTTTCTTTGGGACAGCCCTCGTA

--

>Btmar1.10.11\_gi-1092455507-gb-MAMS01000028\_1-:4478372-4479021  
gi-1092455507-gb-MAMS01000028.1-:4478372-4479021 Bemisia tabaci isolate MEAM1 Scaffold161,  
whole genome shotgun sequence 650 bp

AATTCCTGGTTTCTGCATCACGATAATGCACCTGCCCATGCATCCCTCCAAATTCGCGAA  
TTTTGTGCAAAGAATGCCATGAGTGTCTCCCTCACCCCCTTATTCACCTGACCTGGCT  
TCGTGTAATTTTTCTTATTTCCGCGACTTAAATCTACCTGGAAAGGTCGACGTTTTCAA  
ACCGTTCCGGAAATTCAAGAGAACACCTTGAAGGAATTGCGATCATTCAAACCTGAGGAT  
TTCCAATAGTTTTCTTCCAATTGAAGAAACGGTGGCAAAAATGCATCAACAAAGCTGGC  
GAGTATTTTGAAGGGGATAGGTGATGACTTGGTAATCTGCTTAAAATGTTAATTTCTTA  
TTTTTAAGCATTTGAATAAGAGAGCAACGAAGTTTTTAACTTAAAACCTGGGTTTATTTT  
TAAGTTGTATCCAAATTTTTCTTGAAATAAAGACAAAAATCGCAACTCGAATTTGACTTT  
CCTTTACTCCAAAGCGTGTAGTTTCCTTATCAAGACGAATTTTGCATTCTGTAAAAACA  
AGCATCTCCAATAGCTTATCAGCTTTCAGACAAGCCCAAGAAAACCTCATTACGACGCTC  
GGTTCGCCTTCTATGACAAAAGTCCGGTTTCTTTGGGACAGCCCTCGTA

--

>Btmar1.10.12\_gi-1092455566-gb-MAMS01000020\_1-:8219594-8220137  
gi-1092455566-gb-MAMS01000020.1-:8219594-8220137 Bemisia tabaci isolate MEAM1 Scaffold14,  
whole genome shotgun sequence 544 bp

ACCTTACCTGGCTCCGTGTGATTTTTCTTATTTCCACGACTTAAATCTACCTTAAAAGG  
TCGAAGTTTTTCAGACCATTCCGGAATTCAAGAAAACATCTTGTAGGAATTGCGATCATT  
CAAATCTGAGGATTTCCAACTAGTGTTCTCCCAATTGAAGAAACGGTGGCAAAAATGCA  
TCGACAAAGCTGGCGAGTATTTGAAGGGGATATGTTATGACTTGGTAGGCTGCTTAAAA  
TGTTAATTTCTTATGTTTAAGCATTTGAATAAGAGAGCAACGAAGTTTTTAACTTAAAA  
CCTGGGTTTTTTTAAAGTTGTATCTAAATGTTTCTTGAAATAAAGACAAAAATCGCAACT  
TCAGTTTGACTTTCCTTATTCCAAAGCGTGTAGTTTCCTTGCCAATACGAATTTTGCA  
TTCTGTAAAAACAAGCATCTTCAGTAGCTTATCAGCTTTCAAACAAGCTCAAGAAAACCT  
CATTACGACGCTCGGTTTCGCCTTCTATGACAAAAGTCCGGTTCTTTTGGGACAGCCCTC  
GTAC

--

>Btmar1.10.13\_gi-1092425808-gb-MAMS01019730\_1-:3364638-3365175  
gi-1092425808-gb-MAMS01019730.1-:3364638-3365175 Bemisia tabaci isolate MEAM1 Scaffold995,  
whole genome shotgun sequence 538 bp

TGGCTCCGTGTGATTTTTCTTATTTCCACGACTTAAATCTACCTTGAAAGGTCAACGTT  
TTCAAATCATTCCGGAAATTCAAGAGAACACCTCGAAGGAATTGCGATCATTCAAACCTG  
AGGATTTCCAACAGTGTTTCTTCCAATTGAAGAAACGGTGGTGGCAAAAATGCATCGAAA  
AAGCTGGCGAGTATTTTGAAGGGATAGGTGATGACTTGGTAAGCTGCTTAAAATGTAA  
TTTCCTCATTTTTAAGCATTTGAATGAGAGAGCAACGAAGTTTTTAACCTAAAACCTGGG  
TTTTTCTTAAGTTGTATCCAAATTTTTCTTGAAATAAAGACAAAAATCGCAACTCGAGT  
TTGACTTTCCTTTATTCCAAAGCGTGTAGTTTCCTTACCAAGACGAATTTTTGCATTCTG  
TAAAAACAACCATCTCCAGTAGCTTATCAGCTTTCAAACAAGCCCAAGAAAACCTTCATTA  
CGACGCTCGGTTGCGCTTCTATGACAAAAGTCCGGTTTCTTTTGGGACAGCCCTCGTA

--

>Btmar1.10.14\_gi-1092436163-gb-MAMS01009375\_1-:1546906-1547441  
gi-1092436163-gb-MAMS01009375.1-:1546906-1547441 Bemisia tabaci isolate MEAM1 Scaffold4704,  
whole genome shotgun sequence 536 bp

TGGCTACGAGTGATTTTTTCATATTTCCACGACTTAAATCTACCTTGAAAGGTCGACGTT  
CTCAAACCATTCGGAAATTCAAGAGAACACCTTGAAGGAATTGCGATCATTCAAACCCG  
AGGATTTCCAACAGTCTTTCTTCCAATTGAAGAAACGGTGGCAAAAATGCATCGACAAAG  
CTGGCGAGTATTTTGAAGGGAATAGGTGATGACTTGGTAAGCTGCTTAAAATGTTAATTT  
CCTTATTTTTAAGCATTTGAATAAGAGACAGCAACGAAGTTTTTAACCTAAAACCTGGGT  
TTTTTTAAGTTGTATCGAAATTTTTCTGAAATAAAGACAAAAATCGCAACTCGAGTTTG  
ACTTTCCTTTATTCCAAAGCGTGTAGTTTCTTTACCAAGACGAATTTTTGCATTGTGTAA  
AGAGCAGCATCTCCAGTAGCTTATCAGCTTTCAAACAAGCTCAAGAAAACCTCATTACGA  
CGCTCGGTTGCGCTTCTATGACAAAAGTCCGGTTTCTTTTGGGACAGCCCTCGTAC

--

>Btmar1.10.15\_gi-1092455544-gb-MAMS01000025\_1-:3503754-3504288  
gi-1092455544-gb-MAMS01000025.1-:3503754-3504288 Bemisia tabaci isolate MEAM1 Scaffold147,  
whole genome shotgun sequence 535 bp

TGGCTCCGTGTGATTTTTCTTATTTCCACGACCTAAATCTACCTTGAAAGGTCGACATT  
TTCAAACCATTTTCGAAATTCAAGAGAACACCTTGAAGGAATTGCGATCATTCAAACCTG  
AGGATTTCCAACAGTTTTCTCCAATTGAAGAAACGGTGGCAAAAATGCATCGACAAAG  
CTGGCGAGTATTTGAAGGGGATAGGTGATGACTTGGTAAGCTGCTTAAAATGTAAATTT  
CCTTATTTTAAAGCATTTGAATAAGAGAGCAACGAAGTTTTTAACTTAAAACCTGGGTTT  
ATTTTAAAGTTGTATCCAAATTTTTCTTGAAATAAAGACAAAAATCGCAACTCGAGTTTG  
ACTTTCCTTTACTCCAAAGCGTGTAGTTTCCTTACCAAGACGAATTTTGCATTCTGTAA  
AAACAAGCATCTCCAGTAGCTTATCAGCTTTCAAACAAGCCCAAGAAAACCTCATTACGA  
CGCTCGGTTTCGCTTCTATGACAAAAGTCCGGTTTCTTTGGGACAGCCCTCGTA

>Btmar1.10.16\_gi-1092455544-gb-MAMS01000025\_1-:183806-184350  
gi-1092455544-gb-MAMS01000025.1-:183806-184350 Bemisia tabaci isolate MEAM1 Scaffold147, whole  
genome shotgun sequence 545 bp

ACCTGACCTGGCTCCGTGTGATTTTTCTTATTTCCACGACTTAAATCTACCTTGAAAGG  
TCGACGTTTTCAAACCATTCGGAATTCAAGAGAACACCTTGTAGGAATTGCGATCATT  
CAAATCTGAGGATTTCCGACATTGTTTCTCCAGTTGAAGAACGGTGGAAAAAATGCAT  
CGACAAAGCTGGCGAGTATTTGGAGGGGATAGGTGATTGGTGTAAGCTGCTTAAATG  
TTAATTCCTTATTTTAAACATTTGAATAAGAGAGCAACGAAGTTTTTAACTTAAAACC  
TGGGTTTTTTAAGTTGTATCTAAAATTTCTTGAAATAAAGACAAAAATCGCAACTCGA  
GTTGGACTTTCCTTATTCCAAAGCGTGTAGTTTCCTTACCAAGACGAATTTTGCATTC  
TGTA AAAACAAGCATCTTCAGTAGCTTATCACCTTTCAAACAAGCCCAAGAAAACCTCAA  
TAGGTACGACACTCGGTTTCGCTTCTATGAGAAAAGTCCGGTTTCTTTGGGACAGCCCT  
CGTAC

--

>Btmar1.10.17\_gi-1092454896-gb-MAMS01000189\_1-:1235067-1235718  
gi-1092454896-gb-MAMS01000189.1-:1235067-1235718 Bemisia tabaci isolate MEAM1 Scaffold597,  
whole genome shotgun sequence 652 bp

AATTCCTGGTTTCTGCATCACAATAATGCACCTGCCTATGCATCCCTCCAAATTCGCGAA  
TTTTGTGTAAAGAATGCCATGAGTGTCTCCCTCATCCCCCTATTACCTGACCTGACT  
CTGTGTGATTTTTCTTATTTCCACGACTTAAATCTACCTTGAAAGGTCGACGTTTTCAA



ACCATTCCGGAAATTCAAGAGAGCACCTTAAAGGAATTGCGATCATTCAAACCTGAGGAT  
TTCCAACAGTGTCTTCTCCAATAATTGAAGAAACGGTGGCAAAAATGCATCGACAAAGCT  
GGCGAGTATTTTGAAGGGAATAGGTGATGACTTGGTAAGGTGCTTAAAATGTTAATTTC  
TTATTTTAAAGCATTTGAATAAGAGAGCAACGAAGTTTTTAACTTAAAACCTGGGTTTTT  
TTTAAGTTGTATCCAAATTTTCTTGAAATAAAGACAAAAATCGCAACTCGAGTTTGACT  
TTCCTTTATTCCAAAGCTTGTAGTTTCCTTACCAAGACGAATTTTGCATTCTGTAAAA  
CAAGCATCTCCAGTAGCTTATCAGCTTCAAACAAGCCCAAGAAAACCTCATTACGAAGC  
TCGGTTCGCCTTCTACGACAAAAGTCCGGTTTCTTTGGGACAGCCCTCGTA

--

>Btmar1.10.18\_gi-1092455225-gb-MAMS01000096\_1-:4735065-4735607  
gi-1092455225-gb-MAMS01000096.1-:4735065-4735607 Bemisia tabaci isolate MEAM1 Scaffold322,  
whole genome shotgun sequence 543 bp

ACCTGACCTGGCTCCGTGTGATTTTTCTGGTTCCACGACTTAGATCTACCTTGAAAGG  
TCGACGTTTTTAAACCATTCCAGAAATCCAAGAGAACACCTTGTAGGAATTGCAATCATT  
CAAATCTGAGGATTTCCAACACTGTTTCTCCCAATTGAAGAAACGGTGGCAAAAATGCAT  
CGACAAAGCTGGCGAGTATTTTGAAGGGGATAGGTGATGACTTGGTAAGCTGCTTAAAAT  
GTTAATTTCTTATTTTAAAGCATTTGAATAAGAGAGCAACGAAGTTTTTAACTGAAAAC  
CTGGGTTTTTTTTAAAGTTGTATCTAAATTTTCTTGAAATAAAGACAAAAATCGCAACT  
CGAGTTTGACTTTCCTCTATTCCAAAGCGTGTAGTTTCCTTACCAAGACGAATTTTGA  
TTCTGTAAAAACAAGCATCTCCAGTAGCTTATCAGCTTCAAACAAGCTCAAGAAAACCT  
CATTACGACGCTCAGTTCGCCATCTATGACAAAAGTCCGGTTTCTTTGGGACAGCCCTC  
GTA

--

>Btmar1.10.19\_gi-1092455371-gb-MAMS01000058\_1-:3033980-3034520  
gi-1092455371-gb-MAMS01000058.1-:3033980-3034520 Bemisia tabaci isolate MEAM1 Scaffold232,  
whole genome shotgun sequence 541 bp

ACCTGACCTGGCTCCGTGTGATTTTTTCTTATTTCCACGACTTGAATCTACCTTGAAAA  
GGTCGACGTTTTCAAACCATTCCGGAAATTCAAGAGAACACATTGTAGGAATTGCGATCA  
TTCAAATCTGAGGACTTCCAACAGTGTCTCCCAATTGAAGAAACGGTGGCAAAAATGC

ATCGACAAAGCTGGCGAGTATTTTTAAAGGGATAGGTTATGACTTGGTAAGCTGCTTAAA  
ATGTCAATTCCTTGTTTTAAGCATTTGAATAAGAGAGAAACGAATTTTAACTTAAAA  
CCTGGGTTTTTTAAGTTGTATCTAAATTTTTCTTGAAATAAAGACAAAAATCGCAACTC  
GAGTTTGACTTTCCTTTATTCCAAAGCGTGTAGTTTCCTTACCAGGACGAATTTTGCAT  
TCTGTAAAAACAAGCATCTTTAGTAGCCTATCAGCTTTCAAAAAGCCCAAGAAAACTTCA  
TTACGACGCGCGGTTTCGCTTCTATGACAAAAATCCGGTTTCTTTTGGGACAGCCCTCGT  
A

--

>Btmar1.10.20\_gi-1092455312-gb-MAMS01000080\_1:-2657019-2657554  
gi-1092455312-gb-MAMS01000080.1:-2657019-2657554 Bemisia tabaci isolate MEAM1 Scaffold28,  
whole genome shotgun sequence 536 bp

TGGCTCTGTGTGATTTTTCTTATTTCCACGACTTAAATCTACCTTGAAAGGTCGACATT  
TTCAAACCATTCGGAAATTCAAGAGAACACTTTGAAGGAATTGCGATCATTCAAACCTG  
AGGATTTCCAACAGTTTTTCTTCCAATTGAAGAAACGGTGGCAAAAATGCATCGACAAAG  
CTGGCGAGTATTTTGAAGGGGATAGGTGATGACTTGGTAAGCTAGCTTAAAATGTAAATT  
TCCTATTTTTAAGCATTTGAATAAGAGAGCAACGAAGTTTTTAACTTAAACCTGGGT  
TATTTTAAAGTTGTATCCAAATTTTTCTTGAAATAAAGACAAAAATCGCAACTCGAGTTT  
GACTTTCCTTTACTCCAAAGCGTGTAGTTTCCTTACCAAGACGAATTTTGCATTCTGTA  
AAAACAAGCATCTCCAGTAGCTTATCAGCTTTCAAACAAGCCCAAGAAAACTTCATTACG  
ACGCTCGGTTTCGCTTCTATGACTAAAGTCCGGTTTCTTTTGGGACAGCCCTCGTA

--

>Btmar1.10.21\_gi-1092445037-gb-MAMS01004535\_1:-322389-323042  
gi-1092445037-gb-MAMS01004535.1:-322389-323042 Bemisia tabaci isolate MEAM1 Scaffold2663,  
whole genome shotgun sequence 654 bp

AATTCCTGTTTCTGCATCAAGATAATGCACCTGCCATGCATCCCTCAAATTCGCGAA  
TTTTGTGCAAAGAATGCCATGAGTGTCTCCCTCATCCCCCTCATTACCTATGACCTGG  
CTCCGTGTGATTTTGTCTATTTCCACGACTTAAATCTACCTTGAAAGGTCGACGTTTTTC  
AAACCATTCGGAAATTCAAGAGAGCACTTCGAAGGAATTGCGATCATTCAAACCTGAGG

ATTCCAACAGTGTCTTCCGATTGAAGAAACGGTGGCAAAAATGCATCGACAAAGCTG  
GCGAGTATTTTGAATGGGATTGGTGATGACTTGGTAAGCTGTTTAAAATGTTAATTCCT  
TATTTTAAAGCATTTGAGTAAGAGAGCAACGAAGTTTTTAACCTAAAACCTGGGTTTTTT  
TTTTAAAGTTGTACCCAAATTTTCTTGAAATAAAGACAAAAATCGCAACTCGAGTTTGA  
CTTTCCTTTATTCCAAAGCGTGTAGTTTCCTTACCAAGACGAATTTTGCATTCTGTAAA  
AACAAGCATCTCCAGTAGCTTATCAGCTTTCAAACAAGCCCAAGAAAACCTCATTACGAC  
GCTCGGTTGCGCTTCTATGACAAAAGTCCGTTTTCTTTGGGACAGCCCTCGTA

>Btmar1.10.22\_gi-1092445037-gb-MAMS01004535\_1-:110926-111567  
gi-1092445037-gb-MAMS01004535.1-:110926-111567 Bemisia tabaci isolate MEAM1 Scaffold2663,  
whole genome shotgun sequence 642 bp

GGTTTCTGCATCACGATAATGCACCTGCCCATGCATCCCTCCAAATTCGCGAATTTTGTG  
CAAAGAATGCCATGAGTGTCTCCCTCATCCCCCATATTGACCTGACTTGGCTCCGTGTG  
ATTTTCTCTTATTTCCACGACTTAAATCTACCTGAAAAGTTGACGTTTTCAAATCATT  
CGGAAATTCAAGAGAACACCTGAAGGAATTGCGATCATTCAAACCTGAGGATTTCCAAC  
AGTGTCTCTTCTAATTGAAGAAACGGTGGCAAAAATGCATCGACAAAGCTGGCGAGTATT  
TTGAAGGGGATAGGTGATTACTTGGTAAGCTGCTTAAAATGTTAATTCCTTATTTTTAA  
GCATTTGAATAAGAGAGCAAAGAAGTTTTTCACTTAGAACCTGGGTTTTTTGTAAGTTGT  
ATCCAAATTTTTCTTGAAATAAAGACAAAAATCGCAACCCGAGTTTGACTTTCCTTTATT  
CCAAAGCGTGTAATTTCTTACCAAGACGAATTTTGCATTCTGTAAAAACAAGCATCTC  
CAGTAGCTTATCAGCTTTCAAACAAGCCCAAGAAAACCTCATCACGACGCTCGGTTTCGCC  
TTCTATGACAAAAGTCAGGTTTTCTTTGGGACAGCCCCCGTA

--

>Btmar1.10.23\_gi-1092454801-gb-MAMS01000208\_1-:2515656-2516189  
gi-1092454801-gb-MAMS01000208.1-:2515656-2516189 Bemisia tabaci isolate MEAM1 Scaffold649,  
whole genome shotgun sequence 534 bp

TGGCTCCGTGTGATTTTTCTTATTTCCACGACTTAAATCTACCTTGAAGGTCGACGTT  
TTCAAACCATTCGGAAATTCAAGAGAACACCTTGAAGAAATTGCGATCATTCAAACCTG  
TGGATTTCTAACAGTTTTTCTTCCAATTGAAGAAACGGTGGCAAAAATGCATCGACAAAG

CTGGCGAGTATTTTGAAGGGGATAGGTGATGACTTGGCAAGCTGCCTAAAATGTTAATTT  
CCTTATTTTAAAGCATTTGAATAAGAGAGCAACGAAGTTTTTAACTTAAACCTGGGTTT  
ATTTTAAAGTTTTATCAAATTTTCTTGAAATAAAGACAAAAATCGCAACTCGAGTTTGA  
CTTTCCTTTATTCCAAAGCGTGTAGTTTCCTTACCAAGACGAATTTTGCATTCTGTAA  
AACAAGCATCTCCAGTAGCTTATCAGCTTTCAAACAAGCCCAAGAAACTTCATTACGAC  
GCTCGGTTCTGCTTCTATGACAAAAGTCCGGTTTCTTTGGGACAGCCCTCGTA

--

>Btmar1.10.24\_gi-1092438700-gb-MAMS01007559\_1-:105498-106039  
gi-1092438700-gb-MAMS01007559.1-:105498-106039 Bemisia tabaci isolate MEAM1 Scaffold39221,  
whole genome shotgun sequence 542 bp

ACCTGAACGGCTCGGTGTGATTTTTCTTGTTCACGACTTAAATTTACCTTGAAAGGT  
CGACGTTTTCAAACCATTCGGGAAATCCAAGAGAACACCCTGTAGGAATTGCGATCAATC  
AAATCTGAGGATTTCCAACAGTGTTCCTCCAATTGAAGAAACAGTGGCAAAAATGCATC  
GACAAAGCTGGCAAGTATTTGAAGGGGATAGGTGATGACTTGGTAAGCTGCTTAAATG  
TTAATTCCTTATTTTAAAGCATTTGAATAAGAGAGCAACGAAGTTTTTAACTTAAAC  
TGGGTTTTTTTAAAGTTGTATCTAAATTTGTCTTGAGATGAAGACAAAATCGCAACTCG  
AGTTTGACTTTCCTTTATTCCAAAGCGTGTAGTTTCCTTACCAATACGAATTTTGCATT  
CTGTAAAAACAAGCATCTTCAGTAGCTTATCAGCTTTCAAACAAGCCCAAGAAACTTCA  
TTACGACGCTCGGTTCCGCTCTATGACAAAAGTCCGGTTTCTTTGGGACAGCCCTCGT  
AC

--

>Btmar1.10.25\_gi-1092453732-gb-MAMS01000665\_1-:1733438-1733973  
gi-1092453732-gb-MAMS01000665.1-:1733438-1733973 Bemisia tabaci isolate MEAM1 Scaffold1145,  
whole genome shotgun sequence 536 bp

TGGCTCCGTATGATTTTGTCTTATTTCCACGACTTAAATCTACCTTGAAAGGTCGACGTT  
TTCAAACCATTCGGGAAATCAAGAGAACACTTTGAAGGAATTGCGATCATTAACCTG  
AGGATTTCCAACAGTGTTCCTCCGATTGAAGAAACGGTGGCAAAAATGCATCGACAAAG  
CTGGCGAGTATTTTGAAGGGGATTGGCGATGACTTGTAAGCTGCTTAAATGTTAATTTT  
CTTATTTTAAAGTATTTGAGTAAGAGAGCAACGAAGTTTTTAACTTAAACCTGGGTTT

TCTTTTAAAGTTGTATCCAAATTTTCTTGAAATAAAGACAAAAATCGCAACTCGAGTTT  
GACTTTCCTTTATTCCAAAGCGTGTAGTTTCCTTACCAAGACGAATTTTGCATTCTGTA  
AAAACAAGCATCTCCAGTAGCTTATCAGCTTTCAAACAAGCCCAAGAAAACCTTCATTACG  
ACGCTCGGTTTCGCTTCTATGACAAAAGTCCGGTTTCTTTTGGGACAGCCCTCGTA

--

>Btmar1.10.26\_gi-1092425936-gb-MAMS01019602\_1-:331369-332018  
gi-1092425936-gb-MAMS01019602.1-:331369-332018 Bemisia tabaci isolate MEAM1 Scaffold946, whole  
genome shotgun sequence 650 bp

AATTCCTGGTTTCTGCATCACGATAATGCACCTGCCCATGCATCCCTCCAAATTCGCGAA  
TTTTGTGCAAAGAATGCCGTGAGTGTCTCCCTCATCCCCCTTATTCACCTGACCTGACT  
CCGTGTGATTTTTCTTATTTCCACGACTTAAATCTACCTTGAAAGGTCGACGTTTCAA  
ACCATTCGGGAAATTCAAGAGAACACCTTGAAAGAATTGCGATCATTCAAACCTGAAGAT  
TTCCAACAGTTTTTCTTCAATTGAAGAAACGGTGGCAAAAATGCATCGACAAAGCTGGC  
GAGTATTTTGAAGGGGATAGGTGATGACTTGGAAGCTGCTTAAAATGTTAATTTCTTA  
TTTTTAAGCATTTGAATAAGAGAGCAACGAAGTTTTTAACTTAAACCTGGGTTTATTTT  
TAAGTTGTATCCAAATTTTCTTGAAATAAAGACAAAAATCGCAACTCGAGTTTGACTTT  
CCTTATTCCAAAGCGTGTAGTTTCCTTACCAAGACGAATTTTGCATTCTGTAAAAACA  
AGCATCTCCAATAGCTTATCAGCTTTCAAACAAGCCCAAGAAAACCTTCATTACGACGCTC  
GGTTCGCCTTCTATGACAAGAGTCCGGTTTCTTTTGGGACAGCCCTCGTA

--

>Btmar1.10.27\_gi-1092435905-gb-MAMS01009633\_1-:570191-570725  
gi-1092435905-gb-MAMS01009633.1-:570191-570725 Bemisia tabaci isolate MEAM1 Scaffold4818,  
whole genome shotgun sequence 535 bp

TGGCTCCGTGTGATTTTTTCTTATTTCCACGACTTAAATCTATCTTGAAAGGTCGACATT  
TTCAAACCATTCGGGAAATTCAAGAGAACACCTTGAAAGAATTGCGAACATTCAAACCTG  
AGGATTTCCAACAGTTTTTCTTCAATTGAAGAAACGGTGGCAAAAATGCATCAACAAAG  
CTGGCGAGTATTTTGAAGGGGATAGGTGATGACTTGGAATCTGCTTAAAATGTTAATTT  
CCTATTTTTAAGCATTTGAATAAGAGAGCAACGAAGTTTTTAACTCAAAACCTGGGTTT  
ATTTTTAAGTTGTATCCAAATTTTCTTGAAATAAAGACAAAAATCGCAACTCGAGTTTG  
ACTTTCCTTTACTCCAAAGCGTGTAGTTTCCTTACCAAGACGAATTTTGCATTCTGTAA

AAACAAGCATCTCCAGTAGCTTATCAGCTTTCAAACAAGCTCAAGAAAACCTTCATTACGA  
CGCTCGGTTTCGCCTTCTATGACTAAAGTCCGGTTTCTTTGGGACAGCCCTCGTA

--

>Btmar1.10.28\_gi-1092453894-gb-MAMS01000592\_1-:10537-11188  
gi-1092453894-gb-MAMS01000592.1-:10537-11188 Bemisia tabaci isolate MEAM1 Scaffold11199, whole  
genome shotgun sequence 652 bp

AATTCCTGGTTTCGGCATCACGATAATGCACCTGCCCATGCATCCCTCCAAATTCGCGAA  
TTTTGTGCCAAGAATGCCATGAGTGTCTCCCTCATCCCCTTATTACCTGACCTGGCT  
CCGAGTGATTTTTTTTTATTTCCACGACTTAAGTCTACCTTGAAAGGTCGACGTTTTCAA  
ACCATTCCGGAAATTCAAGAGAACACCTTGAAGGAATTGCGATCATTCAAACCTGTGGAT  
TTCCAACAGTGTTTCTTCCAATTGAACAAACGGTGGCAAAAATGCATCGACAAAGGTTGG  
CGAGTATTTTGAAGGGGATAGGTGATGACTTGGTAAGCTGCTTAAATGTTAATTCCTT  
ATTTTAAAGCATTTGAATAAGAGAGCAACGAAGTTTTTAACATAAAACCTGGGTTTTTTT  
TTAAGTTGTATCCAAATTTTCTTGAAATAAAGACAAAAATCGCAACTCGAGTTTGACT  
TTCCTTTATTCCAAAGCGTGTAGTTTCCTTACCAAGACGAATTTTGCATTCTGTAAAAA  
CAAGCATCTCCAGTAGCTTATCAACTTCAAACAAGCCCAAGAAGACTTCATTACGACGC  
TCGGTTCGCCTTCTATGACCAAAGTCCAGTTTCTTTGGGACAGCCCTCGTA

--

>Btmar1.10.29\_gi-1092440209-gb-MAMS01006820\_1-:57609-58258  
gi-1092440209-gb-MAMS01006820.1-:57609-58258 Bemisia tabaci isolate MEAM1 Scaffold3609, whole  
genome shotgun sequence 650 bp

AATTCCTGGTTTCTGCATCACGATAATGCACCTGCCCATGCATCCCTCCAAATCCGCGAA  
TTTTGTGCAAAGAATGCCATGAGTGTCTCACTCATCCCCTTATTACCTGACCTGGCT  
CCGTGAGATTTCTTCTTATCTCCACGACTTAAATCTACCTTGAAAGGTCGACGTTTTCAA  
ACCATTCTGGAAATTCAAGAGAACACCTTGAAGGAATTGCGATCATTCAAACCTGAGAAT  
TTCCAACAGTATTTCTTCCAATTGAAAAACGGTGGCAAAAATGCATCGACAAAGCTGGC  
AAGTATTTTGAAGGGGATAGGTGATGACTTGGTAAGCTGCTTAAATGTTGATTCCTTA  
TTTTTAAGCATTTGAATAAGAGAACACGAAGTTTTTAACCTAAAACCTGGGTTTATTTT  
TAAGTTGTATCCAAATTTTCTTGAAATAAAGACAAAAATTGCAACTCGAGTTTGACTTT  
CCTTTATTCCAAAGCGTGTAGTTTCCTTACCAAGACGAATTTTGCATTCTGTGAAAACA

AGCACCTCCAGTAACTTATCAGCTTTCAAATAAGCCCAAGAAAACCTTCATTACGACGCTC  
GGTTCGCCTTCTATGACAAAAGTCCGGTTTCTTTGGGATAGCCCTCGTA

--

>Btmar1.10.30\_gi-1092442381-gb-MAMS01005928\_1-:58-685  
gi-1092442381-gb-MAMS01005928.1-:58-685 Bemisia tabaci isolate MEAM1 Scaffold32319, whole  
genome shotgun sequence 628 bp

GATAATGCACCTGCCCATGCATCCCTCCAAATTGGCGAATTTGTGCAAAGAATGCCATG  
AGTGTCTCCTCATCCCCCTTATTCACCTAACCTGGCTCCGCGTGATTTTTTATTATTC  
CCACAACCTAAATCTACCTTGAAAGGTCGACGTTTTCAAACCATTCCGGAAATTCAAGAG  
AACACCTTGAAGGAATTGCGATCATTCAAACCTGAGGATTCCTACAGTGTTTCTCCCAA  
TTGAAGAAACAGTGGCAAAAATGCATTGACAAAGCTGGCGAGTATTTGAAGGGGATAGG  
TGATGACTTGGTAAGCTGCTTAAAATGTTAATTCCTTATTTTAAGCATTTGAATGAGA  
GCAACGAAGTTTTTAACCTAAAACCTGGGTTTTTTAAGTTGTATTGAAATTTTCTTGA  
AATAAAGACAAAAATCGCAACTCGAGTTCGACTTCTTTTATTCCAAAGCGTGATGTTTC  
CTTACCAGGACGAATTTTTGCATTCTGTAAAAACCAGTATCTCCAATAGCGTATCAGCTT  
TTTCAAACAAGCCCAAGAAAACCTTCATTACGACGCTCGGTTTCGCCCTCTTATGACAAAAG  
TCCGGTTTCTTTGGGACAGCCCTCGTA

>Btmar1.10.31\_gi-1092450413-gb-MAMS01002223\_1-:18881-19516  
gi-1092450413-gb-MAMS01002223.1-:18881-19516 Bemisia tabaci isolate MEAM1 Scaffold17384, whole  
genome shotgun sequence 636 bp

AATTCCTGGTTTCTGCATCACGATAATGCACCTGCCCATGCATCCCTCCAAATTCGCGAA  
TTTTGTGCAAAGAATGCCATGAGTGTCTCCTCATCCCCCTTATTCACCTGACTTGGCT  
CCGTGTGATTTTTTCTTATTTCCACGACTTAAATCTACCTTGAAAGGTCGACGTTTTCAA  
ACCATTCCGGAAATTCAAGAGAACACCTTGAAGGAATTGCGATCATTCAAACCCGTGGAT  
TTCCAACAGTGTTTCTTCAAGTTGAAGAAACGGTGGCAAAGCTGGCGAGTATTTGAAGG  
GGATAGGTGATGACTTGGTAAGCTGCTTAAAATGTTAATTCCTTATTTTAAGCATTTG  
AATAAGAGAGCAACGAGTTTTTAACCTAAAACCTGGGTTCTTTTTAAGTTGTATCCAA  
ATTTATCTTGATATAAAGACAAAAATCGCAACTCGAGTTTGACTTTCCTTTATTCCAAAG  
CGTGTAGTTTCTTACCAAGACGAATTTTTGGATTCTGTAAAAACAAGCATCTCCAGTAG  
CTTATCAGCTTTCAAACAACCCCAAGAAAACCTTCATTACCACGCTCGGTTTCGCCTTCTAG

GACAAAAGTCCGGTTTCTTTGGGACAGCCCTCGTA

--

>Btmar1.10.32\_gi-1092454665-gb-MAMS01000250\_1-:120198-120740

gi-1092454665-gb-MAMS01000250.1-:120198-120740 Bemisia tabaci isolate MEAM1 Scaffold87, whole genome shotgun sequence 543 bp

ACCTGACCTGGCTCCGTGTGATTTTTCTATTTCATGACTTAAATCTACCTGAAAGG  
TCGACGTTTTCAAACCATTCGGAAATCCAAGAGAACACCTGTAGGAATTGCAATCATT  
CAAATCTGAGGATTTCCAACAGTGTCTCCCAATTGAAGAAACGGTGGCAAAAATGCAT  
CGACAAAGCTGGCGAGTATTTGAAGGGGATAGGTGATGACTTGGTAAGCTGCTTAAAT  
GTTAATTCCTTATTTTAAAGCATTTGAATAAAAGAGCAACGAAGTTTTTAATTTAAAC  
CTGGGTTTTTTTAAAGTTGTATCCAAATTTTCTTGAAATAAAGACAAAAATCGCAACT  
CGAGTTTGACTTACCTTTATTCCAAAGCGTGTAGTTTGCTTACCAAGACGAATTTTGCAT  
TTTTGTAAAAACAAGCATTTTCAGTAGCTTATCAGCTTTCAAACAAGCCCAAGAAAACCT  
CATTACAACGCTTGCTTCGCCTTCTATGACAAAAGTCCGGTTTCTTTGGGACAGCCCTC  
GTA

>Btmar1.10.33\_gi-1092430114-gb-MAMS01015424\_1-:50414-50954

gi-1092430114-gb-MAMS01015424.1-:50414-50954 Bemisia tabaci isolate MEAM1 Scaffold737, whole genome shotgun sequence 541 bp

ACCTGACCTGGCTCCGTGTGATTTTCACTTATTCCACGACTTAAATCTACCTGAAAGG  
TCGACGTTTTCAAACCATTCGGAAATTCAAAAGAGCACCTGTAGGAATTGCGATCATT  
CAAATCTGAGGATATCCAACAGTGTCTCCTAATTGAAGAAACGGTGGCAAAAATGCAT  
CGACAAAGCTGGCGAGTATTTGAAGGGGGTAGGTGATGACTTGGTAAGTTGCTTAAAT  
GTTAATTCCTTATTTTAAAGCATTTGAATAAGAGAGTAACGAAGTTTTTAACTTAAAC  
CTGGGTTTTTTTAAAGTTGTATCTAAATTTTCTTGAAATAAAAACAAAAATCGCAACTCG  
AGTTTGACTTTCCTTCATTCCAAAGCGTGTAGTTTCCTTACCAAGACGAATTTTGCATT  
CTGTAAAAATAAGCATCTTCAGTAGCTTATCAGCTTTCAAATAAGCTCAAGAAAACCTCA  
GTACGACGCTCGATTTCGCCTTCTATGACAAAAGTCCGGTTTCTTTGGGACAGCCCTCGT  
A



>Btmar1.11.1\_gi-1092452480-gb-MAMS01001206\_1-:1018792-1019955  
gi-1092452480-gb-MAMS01001206.1-:1018792-1019955 Bemisia tabaci isolate MEAM1 Scaffold1339,  
whole genome shotgun sequence 1164 bp

GTACGAGGGCTGTCCCAAAGAAACCGGACTTTCGTCATAGAGGGCGAACCGAGCGTCGT  
AATGAAGTTTTCTTGGGCTTGTTTGAAAGCTGATAAGCTATTGAAGATGCTGGTTTTTAC  
AGTATGCAAAAATTCGTCTTGTAAGGAACTGCACGCTTTGGAATAAAGGAAAGTCAAA  
CTCGAGTTGCGATTTTTATCTTTATTTCAAGAAAATTTTAGGTACAACCTTTAAAAACCC  
AGGTTTTAAGTTAATAACTTCGTTGCTCTTATTAATAATGCTTAAAAATAAGGAAATTAAC  
ATTTTAAGCAGCTTACCAAGTCATCACCTATCCCATTCAAATACTCGCCAGCTTTGTCTG  
ATGCATTTTTGCCACCGTTTCTTCAATTGGGAGAAACACTGTTGGAAATCCTCAGGTTTG  
AATGATCACAATTCCTTCAAGGTGTTCTTGAATTTCCGGAATGGTTTGAAAACGTCCC  
TTTCAAGGTAGATTTAAGTCGTGAAAATAAGAAAAAATCACACGGAGCCAGGTTAGGTGA  
ATAAGGGGGGATGAGGGAGGACACTCATGGCATTCTTGCACAAAATTCATCAATTTGGAG  
GGATGCATGGGCAGGTGCATTATCGTGATGCAGAAACCAGGAATTCTCTCTCCAGGCCTT  
TATCTGCGGATATTTTCGCGTAATCGTCTTAGAACACCATTGTAATATTCGCGATTGACA  
GTTTCACCTTGAAGGAATTCGATCATTCAAACCTGAGGATTTCCAACAGTGTTTCTCCC  
AATTGAAGAAACGGTGGCAAAAATGTATCGACAAAGCTGGCTAGTATTTTGAAGGGGATA  
GGTGATGACTTGGTAAGCTGCTTAAAATGTTAATTTCTTATTTTTAAGCATTTTAATAA  
GAGCAACGAAGTTATTAACCTAAAACCTGGGTTTTTTAAAGTTGTACCTAAAATTTTCTT  
GAAATAAAGATAAAAATCGCAACTCGAGTTTGACTTTCCTTTATTCCAAGCGTGACGTT  
TCCTTACCAAGACGAATTTTTGCATTCTGTAAAAACCAGCATCTTCAGTAGCTTATCAGC  
TTTCAAACAAGCCCAAGAAAACCTTCATTACGACGCTCGGTTCCGCCCTCTATGACGAAAGT  
CCGGTTTCTTTTGGGACAGCCCTC

>Btmar1.11.2\_gi-1092425897-gb-MAMS01019641\_1-:1411023-1412201  
gi-1092425897-gb-MAMS01019641.1-:1411023-1412201 Bemisia tabaci isolate MEAM1 Scaffold959,  
whole genome shotgun sequence 1179 bp

TACGAGGGCTGTCCCAAAGAAACCGGACTTTTGTATAGAAGGAGAACCGAGCGTCGTA  
ATGAAGTTTTCTTGGGCTTGTTTGAAAGCTGATAAGCTACTGGAGATGCTGGTTTTAACA  
GAATGCAAAAATTCGTCTTGTAAGGAACTACACGCTTTGGAATAAAGGAAAGTCAAAC

TCGAGTTGCGATTTTTGTCTTTATTTCAAGAAAAATTTAGATACAACTTTAAAAAAAAGC  
CCAGGTTTTAAGTTAAAACTTTGCTGCTCTCATTCAAATGCTTAAAAATAAGGAAAATA  
ACATTTTAAGCAGCTTACCAAGTCATCACCTATCCCCCCTAACTCGCCAACTTTGT  
CGATGTATTTTTGCCACCGTTTCTTCAATTGGGAGAAACACTGTAGGAAATCCTCAGGTT  
TGAATGATCGCTATTCCTTCAAGGTGTTCTTGAACCTCCGGAATGGTTTGAAGACGTC  
GACCTTCCAAGGTAGATTTAAGTCGTGGAAATAAGAAAAATCACACGGAGCCAGGTTAG  
GTGAATAAGGGGGATGAGGGAGGACACTCATGGCATTCTTGCACAAAATTGCGCAATTT  
GGAGGGATGCATGGGCAGGTGCATTATCGTGATGCAGGAACCAGGAATTCTCTCTCAAA  
GCTCAGGCCTTTTTCTGCGGACATTTTCGCGTAATCGTCTTAGAACACCATTGTAATATT  
CGCGATTGACATTTTACCTGAAGGAATTGCGATCATTCAAACCTGAGGATTCCTATA  
GTGTTTCTCCCGATTGAAGAAACGGTGGCAAAAATGCATCGACAAAGTTGGCGAGTATT  
TGGGGGGGATAGGTGATGACTTGGTAAGCTGCTTAAAATGTTAATTTCTTATTTTAAAG  
CATTTGAATGAGAGCAGCAAAGTTTTTAACCTAAAACCTGGGTTTTTTTTTAAAGTTGT  
ATCTAAATTTTCTTGAAATAAAGACAAAAATCGCAACTCGAGTTTGACTTTCCTTATT  
TCAAAGCGTGTAGTTTCCTTACCAAGACGAATTTTGCATTCTGTAAAATCAAGCATCTC  
CAGTAGCTTATCAGCTTTCAAACAAGCCCAAGAAAACTTCATTACGACGCTCGGTTCTCC  
TTCTATGACAAAAGTCCAGTTTCTTTGGGACAGCCCTC

>Btmar1.11.3\_gi-1092446718-gb-MAMS01003827\_1-:381074-381804  
gi-1092446718-gb-MAMS01003827.1-:381074-381804 Bemisia tabaci isolate MEAM1 Scaffold2362,  
whole genome shotgun sequence 731 bp

TACGAGGGCTGTCCCAAAGAAGACTTTTGTATAGAAGGCGAACCGAGCGTTGTAATGA  
AGTTTTCTTGGGCTTGTGTTGAAAGCTGATAAGCTACTGGAGATGCTTGTTTTACAGAAT  
GCAAAAATTTGGCTTGGTAAGGAACTACACACTTTGGAAGAAAGGAAAGTCAAACCTCGA  
GTTGCGATTTTTGTCTTTATTTCAAGAAAAATTCAGATACAACTAAGAAAAACCCAGGTT  
TTAAGTTATAAACTTCGTTGCTCTTATTCAAATGCTTAAAAATAAGGAAATTAACATT  
TTAAGCAGCTTACCAAGTCATCACCTATCCTCTTCAAAACACTCGCCCGCTTGTGATG  
CATTTTTGCCACCGTTTCTTCAATTGGGAGAAACACTGTTGGAAATTCTCAGGTTTGAAT  
GATCGCAATTCCTCCAAGGTGTTCTTTGGAATTTCTGGAATGGTTTGAAAACATCGACCT  
TTCAAGGTAGATTTAAGTCGTGGAAATAAGAAAAAATCACACGGAGCCAGGTGAGGTGAA  
TAAGGGGGATGAGGGAGGACACTCATGGCATTCTTGCACAAAATTCTCGAATTTGGAGG

GATGCATGGGCAGGTGCATTATCGTGATGCAAAAACCAGGAATTCTCTCTCAAAGCTCG  
GGCCTTTTTCTGCGGACATTTTCGTGTAAGTGTCTTAGAACACCTTTGTATTATTTGCGA  
TTGACAGTTTC

--

>Btmar1.11.4\_gi-1092454418-gb-MAMS01000356\_1-:61517-62688  
gi-1092454418-gb-MAMS01000356.1-:61517-62688 Bemisia tabaci isolate MEAM1 Scaffold1040, whole  
genome shotgun sequence 1172 bp

TACGAGGGCTGTCCCAAAGAAACCGGACTTTTGTCTAGAGGGCGAACCGAGCGTCGTA  
ATGAAGTTTTCTGGACTTGTGAAAGCTGATAAGCTACTGGAGATACTGGTTTTTACA  
GAATGCAAAAATTCGTCTTGGAAGGAACTACACGCTTTGGAATGAAGGAAAGTCAAAC  
TCGAGTTGCGATTTTTGTCTTTATTTCAAGAAAAATTTAGATACAACCTAAAAAAACCCA  
GTTTTTAAGTTAAAACTTCGTTGCTCTCATTCAAATGCTTAAAAATAAGGAAATTAACA  
TTTAAAGCAGCTTACCAAGTCATCACCTTCTCCTTCAAATACTCGCCAGCTTTGTCGA  
TGCATTTTTGCCACCGTTTCTCAATTGGGAGAAACACTGTAGGAAATCCTCAGGTTTGA  
ATGATTGCAATTCCTTCAAGGTGTTCTCTTGAATTTCCGGAATGGTTTGAAAACGTCGAC  
CTTCAAGGTAGATTAAAGTCGTGGAAATAAGAAAAAATCACACGGAGCCAGGTTAGGCG  
AATAAGGGGGATGAGGGAGGACACTCATGGCATTCTTGCACAAAATTCGCCAATTTGGA  
GGGATGCATGGGCAGGTGCATTATCGTGACGCAGAAAGCAGGAAATCTCTCTCAAAGCT  
CAGGCCTTCTCTGCGGACATTTTCGCTTAATCGTCTCAGAACACCATTGTAATATTCGC  
GATTGACAGTTTCACCTTGAAGGAATTGCGATCATTCAAACCTGAGGATTCCTACAGTG  
TTTCTCCAATTGAAGAAACGGTGGCAAAAATGCATCGACAAAGCTGGCGAGTATTTTGA  
AGGAGAAAGGTGATGACTTGGTAAGCTGCTTAAATGTTAATTTCTTATTTTAAGCAT  
TTGAATGAGAGCAACGAAGTTTTTAACCTAAAACCTGGGTTTTTTTAAGTTGTATCTAAA  
TTTTTCTTGAAATAAAGACAAAAATCGCAACTCGAGTTTGAATTCCTTTATTCAAAGC  
GTGTAGTTTCCTTACCAAGACGAATTTTGCATTCTGTAAATACCAGTATCTCCAGTAGC  
TTATCAGCTTTCAAACAAGCCCAAGAAAACCTTATTACAACGCTCGGTTGCGCCTCTATG  
ACAAAAGTCCGGTTTCTTTGGGACAGCCCTC

--

>Btmar1.11.5\_gi-1092449723-gb-MAMS01002522\_1-:4319065-4320243  
gi-1092449723-gb-MAMS01002522.1-:4319065-4320243 Bemisia tabaci isolate MEAM1 Scaffold18461,  
whole genome shotgun sequence 1179 bp

GTACGAGGGCTGTCCCAAAGAAACCGGACTTTTGTATAGAAGGCGAACCGAGCGTCGT  
AATGAAGTTTTCTTGGGCTTGTTTGAAAGCTGATAAGCTACTGGAGATGCTGGTCTTTAC  
AGAATGCAAAAATTCGTCTTGGAAGGAACTACACCCTTGAATGAAGGAAAGTCAAA  
CTCGAGTTGCGATTTTTATCTTTATTTCAAGAAAAATTTAGATACAACTTAAAAAAAACC  
CAGGTTTTAAGTTAGAACTTCGTTGCTCTCTTATTCAAATGCTTAAAAATAAGGAAATT  
AACATTTTAAGCAGCTTACCAAGTCATCACCTATCCCCTTCAAATACTAGCCAGCTTTG  
TCGATGCATTTTTGCCACCGTTTCTCAATTGGGAGAAACACTGTTGGAAATCCTCAGGT  
TTGAATGATCGCAATTCCTTCAAGGTGTTCTCTTGAATTCCCGGAATGGTTTGAAAACGT  
CGACCTTTCAAGGTAGATTTAAGTCGTGGAAATAAGAAAAATCACACGGAGCCAGGTTA  
GGTGAATAAGGGGGATGAGGGAGGACACTCATGGCATTCTTGCACAAAATTCGCCAATT  
TGGAGGGATGCATGGGCAGGTGCATTATCGTGATGCAGAAACCAGGAATTCTCTCTCAA  
AGCTCAGGCCTTTTTCTGCGGACATTTTCGCGTAATCGTCTCAGAACACCATTGTAATAT  
TCGCGATTGACAGTTTCACCTGAAGGAATTGCGATCATTCAAACCTGAGGATTTCCAAC  
AGTGTTTCTCCCAACTGAAGAAACGGTGGCAAATATGCATCGACAAAGCTGGCTAGTATT  
TTGAAGGGGATAGGTGATGACTTGGAAGCTGCTTAAATGTAAATTCCTTATTTTTAA  
GCATTTGAATAAGAGAGCAACGAAGTTTATAACTTAAACCTGGGTTTTTTTTAAGTTGT  
ATCTAAATTTTTCTTGAAATAAAGATAAAAATCGCAACTCGAGTTTGACTTTCCTTCATT  
CCAAAGGGTGATTTTCTTACCAAGACGAATTTTGCATTCTGTAAAGACCAGCATCTC  
CAGTAGCTTATCAGCTTTCAAACAAGCCCAAGAAAACCTCATTACGACGCTCGGTTCCGC  
TTCTATGACAAAAGTCCGGTTTCTTTGGGACAGCCCTC

--

>Btmar1.11.6\_gi-1092453380-gb-MAMS01000828\_1-:1508002-1508799  
gi-1092453380-gb-MAMS01000828.1-:1508002-1508799 Bemisia tabaci isolate MEAM1 Scaffold1195,  
whole genome shotgun sequence 798 bp

TCCATTGGGAGAAACACTGTTGGAAATCCTCAGGTTTGAATGATCGCAATTTCTTCAAGG  
TGTTCTCTTGAATTTCCGGAATGGTTTGAAAACGTCGACCTTTCGAGGTAGATTTAAGTC

GTGGAAATAAGAAGAAATCACACGGAGCAAGGTCAGGTGAATAAAGATGATGAGAGAAGA  
CACTCGTGGCATTCTTTGCACAAATTCGCGAATTTGGAGGGATGCTTGGGCAGGTGCATT  
ATCGTGATGCAGAAACCAGGAATTCTCTCTCAAAGCTCGGGCCTTTTTCTGCGGACATT  
TTCACGTAATCGTCTCAGAACACCATTGTATTATTCTCCGTTGACAGTTTCACATTGAAG  
GAATTGCGATCATTCAAACCTGCGGATTTTCAACAGTGTTTCTCCAATTGAAGAAACGG  
TGGCAAAAATGCATCGACAAAGCTGGCGAGTATTTTGAAGGGGATAGATGATGACTTGGT  
ACCTAAGCTGCTTAAAATGTTAATATCCTTATTTTTAAGCATTTGAATAAGAGAGCAACG  
AAATTTTTAACTTAAACCTGGGTTTTTTTTTAAAGTTGTATCTAAATTTTCCTTGAAAT  
AAAGACAAAAATCGCAACTCGAGTTTGACTTTCCTTCATTCCAAGCGTGTAGTTTCCTTA  
CCAAGACGAATGTTTGCATTCTGTAAAAACAAGCATCTTCAGTAGTATATTAGCTTTCAA  
ACAAGCCCAAGAAAACCTTCATTACGACGCTCGGTTGCGCTTCTATGACAAAAGTCCGGTT  
TCTTTTGGGACAGCCCTC

--

>Btmar1.11.7\_gi-1092455272-gb-MAMS01000090\_1:-2536250-2537432  
gi-1092455272-gb-MAMS01000090.1:-2536250-2537432 Bemisia tabaci isolate MEAM1 Scaffold300,  
whole genome shotgun sequence 1183 bp

GTACGAGGGCTGTCCCAAAGAAACCGGACTTTTGTATAGAAGGCGAACCGAGCGTCGC  
AATGAAGTTTTCTTGAGCTTGTTTGAAAGCTGATAAGCTACTGGACATGCTTGTTTTTAC  
AGAATGCAAAAATTCGTCTTGTAAGGAACTACACGCTTCGGAATAAAGGAAAGTCAAA  
CTCGAGTTGCGATTTTTGTCTTTATTTCAAGAAAAATTTAGATATACAACTTTAAAAAAA  
AACCCAGGTTTTAAGTCAAAAACCTTCGTTGCTCTTATTCAAATGCTTAGAAATAAGGA  
AATTAACATTTTAAGCAGCCACCAAGTCATCACCTATCCCCTTCAAATACTCGCCAGC  
TTTGTCGATGCATTTTCGCCACCGTTTCTTCAATTGGGAGAAACACTGTTTGAAATCCTC  
AGGTTTGAATGATCGCAATTCCTTCAAGGTGTTCTTGAATTTCCGGAATGAATTGAAA  
ACGTCGACCTTTCAAGGTAGATTTAAGTCGTGGAAATAAGAAAAAATCACATGGAGCCAG  
GTCAGGTGAATAAGGGGGGTGAGGGAGGACACTCATGGCATTCTTTGCACAAAATTCGCC  
AATTTGGAGGGATGCATGGGCAGGTGCATTATCGTGATGCAGAAACAAGGAATTCTCTCT  
CCAAAGCTCGGCCCTTTTTCTGAGGACATTTTCACGTAATCGTCTCAGAACACTATTGTA  
ATATTGCGGATTAACAGTTTCACCTTGAAAGAATTGCGATCATTCAAACCTGAGGATTTTC  
CAACAGTGTTTCTCCAATTGAAGAAACGGTGGCGAAAATGCATCGACAAAGCTGGCGAG

TATTTTGAAGGGGATAGGTGATGACTTGGCGGGCTGCTTAAAATGTTAATTTCTTTATTT  
CTAAGCATTTGAATAAGAGAGCAACGAAGTTTTTGACTTAAAACCTGGGTTTTTTTAAAG  
TTGTATCTAAATTTTTCTTGAAATAAAGACAAAAATCGCAACTCGAGTTTGACTTTCCTT  
TATCCGAAGCGTGTAGTTTCCTTACCAAGACGAATTTTGCATTCTGTAAAAACAAGCA  
TGTCCAGTAGCTTATCAGCTTTCAAACAAGCTCAAGAAAACCTCATTGCGACGCTCGGTT  
CGCCTTCTATGACAAAAGTCCGGTTTCTTTTGGGACAGCCCTC

--

>Btmar1.11.8\_gi-1092455566-gb-MAMS01000020\_1-:3048665-3049829  
gi-1092455566-gb-MAMS01000020.1-:3048665-3049829 Bemisia tabaci isolate MEAM1 Scaffold14,  
whole genome shotgun sequence 1165 bp

GAGGGCTGTCCCAAAAGAAACCGGACTTTTGTATAGAAGGCGAACCGAGCGTTGTAATG  
AAGTTTTCTTGGGCTTGTTTGAAAGCTGATAAGGTAAGTGAAGATGCTTGTTTTTACAGAA  
TGCAAAAATTCGTCTTGATAAGGAACTACACGCTTTGGAATAAAGGAAAGTCAAACCTCG  
AGTTGCGATTTTTGTCTTTATTTCAAGAAAAATTTAGATACAACCTTAAAAAAACCCAGG  
TTTTGAGTTAAAAACTTTGTTGCTCTCTTATTCAAATGCTTATAAATGAGGAAATTAACA  
TTTTAAGCAGCTTACCAAGTTATCACCTATCCCCTTCAAATACTCGCCAGCTTTGTCGA  
TGCATTTTTGCCACCGTTTCTTCAATTGGGAGAAACACTGGTGGAAATCCTCAGGTTTGA  
ATGTTTCTTCAAGGTGGTTCTCTGAATCTTCGGAATGGTTTGAAAACGTCGACCTTTCA  
AGGTAGATTTAAGTCGTGGAAATAAGAAAAAATCACACGGAGCCAGGTCAGGTGAATAAG  
GGGGATGAGGAGGGACACTCATGGCATTCTTTGCACAAAATTCGCGAATTTGGAGGGATC  
AGGTGCATTATCGTGACGCAGAAACCAGGAATTCTCTCTCAAAGCTCGGGCCTTTTCTG  
CGGACATTTTCGCGTAATCATCTCAGAACTTTATTATAATATTCGCGATTGACAGTTTCA  
CCTGAAGGAATTGCGATCATTCAAACCTGGGGATTCCAATAGTGTTCCTCCAATTGA  
AGAGACGGTGGCAAAAATGCATCGACAAAGCTGGCGAGTATTTTGAAGGGGATAGGTGAT  
AACTTGGTAAGCTGCTTAAAATGTTAATTTCTCATTATAAGCATTGAATAAGAGAGC  
AACGAAGTTTTTAACTTAAAACCTGGGTTTTTTTTTAAAGTTGTATCTAAATTTTTCTTG  
AAATAAAGATAAAAAATCGCAACTCGAGTTTGACTTTCCTTTAATCCAAGCGTGTAGTTT  
CCTTACCAAGACGAATTTTTTTGCATTCTGTAAAAAGAAGCATCTCCAGTAGCTTATCAG  
CTTCAAACAAGCCCAAGAAAACCTCATTACGACTCTCGGTTCGCTTCTATGACAAAAG

TCCGGTTTCTTTGGGACAGCCCTC

--

>Btmar1.11.9\_gi-1092455481-gb-MAMS01000031\_1-:1306220-1307408  
gi-1092455481-gb-MAMS01000031.1-:1306220-1307408 Bemisia tabaci isolate MEAM1 Scaffold17,  
whole genome shotgun sequence 1189 bp

GTACGAGGGCTGTCCCAAAGAAACCGGACTTTTGTATAGAAGGCGAACCGAGCGTCGT  
AATGCAGTTTTCTTGGGCTTGTTTGAAAGCTGATAAGCTACTGAAGATGCTTGTTTTTAC  
AGAATGCAAAAATTCGTCTTGGTAAGGAACTACACGCTTTGGAATAAAGGAAAGTCAAA  
CTCGAGTTGCGATTTTTGTCTTTATTTCAAGAAAAATATAGATACAACCTAAAAAACCCC  
AGGTTTTAAGTTAAAACTTCGTTGCTCTCTTATTCAAATGCTTAAAAAAAAGGAAATT  
AACATTTTAAGCAGCTTACCAAGTCATCACCTATCCTCTTCAAAATACTCGCCAGCTTTG  
TCGATGCATTTTTGCCACCGTTTCTTCAATTGGGAGAAACACTGTTGGAAATCCTCAGGT  
TTGAATGATTGCAATTCCTTCAAGGTGTTCTCTTGAATTTCCGGAATGGTTTGATAAAGT  
CGACCTTTCTAGGTAGATTTAAGTCGTGGAAATAAGAAAAAATCACACGGAGCCAGGTCA  
GGTGAATAAGGGGGATGAGGGAGGACACTCATGGCATTCTTGCACAAAATTCGCGAATT  
TGGAGGGATGCATGGGCAGGTGCATTATCGTGATGCAGAAACCAGGAATTCTCTTTCCAA  
AGCTCGGGACATTTTCTGCGGACATTTTCGCGCAAACGTCTCGGAACACCATTGTAATAT  
TCGCCATTGACAGTTTCTCCTTCGGTAAAAATTCATGATGGACAATTCCTCGAACCTGA  
GGATTTCCAACAGTGTTTCTCCAATTGAAGAAACGGTGGCAAAAATGCATCGACAAAGC  
TGGCGAGTATTTTGAAGGGGATAGGTGATGACTTGGTAAGCTGCTTAAAATGTTAATATC  
CTTATTTTAAAGCATTTGAATAGGAGAGCAACAAAGTTTTTAACTTAAACCTGGGGTTT  
TTTCAAGTTGTATCTAAATTTTTCTTGAAATAAAGACAAAATCGCAACTCGAGTTTGACT  
TTCCTTCATTCCAAAGCGTGTAGTTTCCTTACCAAGACGAATTTATGCATTCTGTAAAAA  
CAAACATCTTCAGTAGCTTATCAGCTTCAAACAAGCCCAAGAAAACCTGCATTACGACGC  
TCGGTTCGCCTTCATGACAAAAGTCCGGTTTCTTTTGGGACAGCCCTC

--

>Btmar1.11.10\_gi-1092454879-gb-MAMS01000194\_1-:288607-289785  
gi-1092454879-gb-MAMS01000194.1-:288607-289785 Bemisia tabaci isolate MEAM1 Scaffold610, whole  
genome shotgun sequence 1179 bp

TACGAGGGCTGTCCCAAAGAAACCGGACTTTTGT CATAGAAGGAGAACCAAGCGTTGTA  
ATGAAGTTTTCTTGGGCTTGTTTGAAAGCTGATAAGCTACTAAAGATGCTGGTTTTTACA  
GAATGCAAAAATTCGTCTTGGAAGGAACTACACGCTTTGGAATAAAGGAAAGTCAAAC  
TCGAGTTGCGATTTTTGTCTTTATTTCAAGAAAAATTCAGATACAACCTTTAAAAAAACC  
CAGGTTTTAAGTTAAGAACTTCGTTGCTCTCATTCAAATGCTTAAAAATAAGAAATTTAA  
CATTTTAAGCAGCTTACCAAGTCATCACCTATCCCCTTCAAAATACTCGCCAGCTTTGTC  
GATGCATTTTTGCCACCGTTTCTTCAATTGGGAGAAACACTGTAGGAAATCCTCAGGTTT  
GAATGATCGCAATTCCTTCAAGGTGAAACTGTCAATCGCGAATATTACAATGGTGTTCTG  
AGACGATTACGCGAAAATGTCCGCAGAAAAAGGCCTGAGCTTTGGAGAGAGAATTCCTGG  
TTCCTGCATCACGATAATGCACCTGCCCATGCATCCCTCCAAATTGGCGAATTTTGTGCG  
AAGAATGCCATTAGTGTCTCCCTCATCCCCCTTATTCACCTAACCTGGCTCCGTGTGAT  
TGTTTCTTATTTCCACGACTTAAATCTACCTGAAAGGTCGACGTTTTCAAACCATTCGG  
GAAGTTCAAGAGAACACTTTGAAGGAATTGCGGTCATTCAAACCTGAGGATTCCTACAG  
TGTTTCTCCAATTGAAGAAACGGTGGCAAAAATGCATCGACAAAGCTGGCGAGTATTTT  
GAAGGGGATAGGTGATGACTTGGTAAGCTGCTTAAAATGTTAATTTCTTATTTTAAGC  
ATTTGAATGAGAGCAAAGAAGTTTTTA ACTTAAAACCTGGGTTTTTTTAAAGTTGTATCT  
AAATTTTTCTTGAAATAAAGACAAAAATCGCAACTCGAGTTTGACTTTCCTTTATTCCAA  
AGCGTGTAGTTTCCTTACCAAGACGAATTTTTTTCATTCTGTAAAAACCAGCATCTCCAGT  
ATCTTATCAGCTTTCAAACAAACCCAAGAAAACCTTATTACAACGCTCGGTTCTCCTTCT  
ATGACAAAAGTCCGGTTTCTTTGGGACAGCCCTCGTAC

--

>Btmar1.11.11\_gi-1092454896-gb-MAMS01000189\_1-:2443006-2444197  
gi-1092454896-gb-MAMS01000189.1-:2443006-2444197 Bemisia tabaci isolate MEAM1 Scaffold597,  
whole genome shotgun sequence 1192 bp

GTACGAGGGCTGTCCCAAAGAAACCGGACTTTTGT CATAGAAGGCGAACCTAGCGTTGT  
AATGAAGTTTTCTTGGGCTTGTTTGAAAGTTGATAAGCTACTGGAGATGCTGGATTTTAC  
GGAATGCAAAAATTCGTCTTAGTAAGGAACTACACACTTTGGAATAAAGGAAAGTCAA  
TTCGAGTTGCGATTTTTATCTTTATTTCAAGAAAAATTAGATACAACCTTAAAAAACCCAG  
TTTTTAAGTTATAAACTTCGGTGCTCTCTTATTCAAATGCTTAAAAATAAGGAAATTATC  
ATTTAAGCAGCTTATCAAGTCATCACCTATCCCCTTCAAAATACTCGCCAGCTTTGTCA



ATGCATTTTTGCCACCGTTTCTTCAATTGGGAGAAACACTGTTGGAAATCCTCAGGTTTG  
AATGATCGCAATTCCTTCAAGGTGAAACTGTCAATCGCGAATATTACAATGGTGTCTAA  
GACGATTACGCGAAAATGTCCGCAATGTCCGCTGAAAAAGGCCTGAGCTTTGGAGAGAAA  
ATTCCTGGTTTCTGCATCACGATAATGCACCTGCCCATGCATCCCTCCAAATTGGCGAAT  
TTCGTGCAAAGAATGCCATGAGTGTCTCCCTCATCCCCCTTATTCACCTAACCTGGCTC  
CGTGTGATTCTTCCTTATTTCCACGACATAAATCTACCTTGAAAGATCGACATTTTCAA  
CCATTCCGGAAATTTAAGAGAATACCTTGAAGGAATTGCGATCATTCAAACCTGAGGATT  
TCCAACAGTGTTCCTCCAATTGAAGAAACGGTGGCAAAAATGCATCGACAAAACCTGGCG  
GGTATTTTGAAGGAGATAGGTGATGACTTAGTAAGCTGCTTGAAATATTAATTCCTTAC  
CTACTTTTAAGCATTGAATGAGAGCAACGAAGTTTTTAACCTAAATCCTAGGTATTTT  
TTAAAGTTGTAGCTAAATTTTCTTGAAATAAAGACAAAAATCGCAACTTGAGTTTGACT  
TTCCTTTATTCAAAGCGTGTAGTTTCTTACTAGGACGAATTTTGCATTTTGTA  
CCAGCATCTCCAGTAGCTCATCAGCTTTCAAACAAGCCCAAGAAAACCTCATTACGACGC  
TCGGTTCGCCTTCTATGACAAAAGTCCGGTTTCTTTGGGACAGCCCTCGTA

--

>Btmar1.11.12\*\_gi-1092434953-gb-MAMS01010585\_1-:107772-108964  
gi-1092434953-gb-MAMS01010585.1-:107772-108964 Bemisia tabaci isolate MEAM1 Scaffold5223,  
whole genome shotgun sequence 1193 bp

TACGAGGGCTGTCCCAAAGAAACCGGACTTTTGTATAGAAGGCGAACCGAGCGTTGTA  
ATGCAGTTTTCTTGGGCTTGTTGAAAGCTGATAAACCACTGGAGATGCTTGTTTTACA  
GAATGCAAAAATTCGTCTTGTAAGGAACTACACGCTCTGGAAGCTCTGGAATAAAGGA  
AAGTCAAACCTCAAGTTGCGATTTTTGTCTTTATTTCAAGAAAAATTTAGATACATCTTAA  
GAAAAACCCAGGTTTTAAGTTAAAAACTTCGTTGCTCTCTTATTCAAATGCTTAAGAATA  
AGGAAATTAACATTTTAAGCAGCTTACCAAGTCATCACCCATCCCCTTCAAATACTCGC  
CAGCTTTGTGATGCATTTTGGACACAGTTTCTTCAATTGGGAGAAACACTGTTGGAAAT  
CCTCAGGTTTGAATGATCGCAATTTCTTCAAGGTGCTCTCTTGAATTTCCGGAATGTTTT  
GAAAACGTGACCTTTCAAGGTAGATATAAGTCGTGGAAATGAGAAAAAATCACAAGGAG  
CCAGGTCAAGTGAATAAGTGGGATGAGGGAGGACACTCATGGCATATTCTTGCACAAAA  
TTCGCGAATTTGGAGAGATGCATGGGACAGGTGCATTATCCTGATGCAGAAACCAGGAATT  
CTCTCTCAAAGCTCGCGCCTTTTCTGCGGACATTTTCGCGTAATCGTCTCATAACACC

ATTGTAATATTCGCGATTGACAGTTTCACCTTGAAGGAATTGCGATCATTCAAACCTGAG  
GAGTTCCAACAGTGTTTCTCCCTTATTGAAGAAACGGTGTCCAAAATGCATCGACAAAGC  
TGGCGAGTATTTTGAAGGGGATAGGAGGTGATGACTTGGTAAGCTGCTTAAAATGTTAAT  
TTCCTTATTTTCAAGCATTGAATAAGAGAGCAACGAAGTTTCAACTTAAACCTGGGT  
TTTTCTTAAGTTGTATCTAAATTTTCTTGAAATAAAGACAAAAATCGCAACTCGAATGT  
GACTTTTCTTATTCCAAGCGTGTAGTTTCCTTACCAAGACTATTTTTTGCATTCTGTA  
AAAACAAGCATCTCCAGTAGCTTATCAGCTTTCACACAAGTCCAAGAAAACCTCATTACG  
ACGCTCGGTTGCGCTTCTATGACAAAAGTCCGGTTTCTTTTGGGACAGCCCTC

--

>Btmar1.11.13\_gi-1092455517-gb-MAMS01000027\_1-:4955996-4956745  
gi-1092455517-gb-MAMS01000027.1-:4955996-4956745 Bemisia tabaci isolate MEAM1 Scaffold155,  
whole genome shotgun sequence 750 bp

TACGAGGGCTGTCCGAAAAGAAACCGGACTTTTGTCTAGATTGCGAACCGATCGTTGTA  
ATGAAGTTTTCTTGGCTTGTTGAAAACCAATAAGCTCCTGGAGATGCTTGCTTTACA  
GAAATCGAAAATTCCTCCTGGTAAGGAACTGCAGGCTTTGCAATAAAGGATAGTCAAAC  
TCGAGTTGCGATTTTTGTCTGTATTTCAAGAAAAATTTAGGTACAACCTAAAAAAAACC  
CAGGTTTCAAGTTAATATCCTCGTTGCTCTTATTCAAATGCTTATAAATAAGGAATTT  
AACATTTTAAGCAGCTTATCAAGTCATCACCTATCCCCTTCAAATACTCGCCAGCTTTG  
TCGATGCCTTTTTATCACCGTTTCTTTAATTGGGAGAAACATTGTTGGATCTCCGCAGGT  
TTGAATGATCGCAATTCCTTCAAGGTGTTGTCTTGAATTTCCGGAATGGTTTGAAAACGT  
CGACCTTTCAAGATAGATTTAAGTCGTGAAATAAGATAAAATCACACGGAGCCAGGTCA  
AGTGAATAAGGGAGATGAGGAAGGACACTCATGGTATTCTTGCACAAAATTCGCGAATT  
TGGAGGGATGCATGGGCAGGTGCATTATCGTAATGCAGAAACCAAGAATTCTCTCCCCAA  
AGCTTGGGCCTTTTTCTGCGGACATTTTCGCGTACTCGTCTCAGAACACCATTGTAATAT  
TCGCGATTGACAGTTTCTCCTTTCGGTAAA

--

>Btmar1.11.14\_gi-1092454888-gb-MAMS01000191\_1:-96894-97681

gi-1092454888-gb-MAMS01000191.1:-96894-97681 Bemisia tabaci isolate MEAM1 Scaffold607, whole genome shotgun sequence 788 bp

ATTGGGAGAAACACTGTTGGAAATCCTCAGGTTTGAATGATCGCAATTCCTTCAAGGTGT  
TCTCTTGAATTTCCGGAATGGTTTGAAAACGTCGACCTTTCAAGGTAGATTTAAGGCATA  
GAAATAAGAAGAAATCACACGGAGCCAGGTTAGGTGAATAAGGGGGATGAGGGAGGATAC  
TCATGGCATTCTTGCACAAAATTCGCCAATTTGGAGGGATGCATGGGCAGGTGCATTAT  
CGTGATGCAGAAATCAGGGATTCTCTCTCAAAGCTCAGGCCTTTTTCTGCGGACTCGCG  
TAATCGTCTCAGAACACCATTGTAATATTCGGGATTGACAGTTTCACCTTTAAGGAATTG  
CGATCATTCAAACCTGAGGATTTCCAACAGTGTTTCTCCAATTGAAGAAACGGTGGCAA  
AAATGCATAGACAAAGCTGGCGAGTATTTTGAAGGGGATAGGTGATGACTTGGTAAGCTG  
CTTAAAATGTTAATTTACTTATTTTTAAGGATTTGAATAAGAGAGCAACGAAGTTCATAA  
CTTAAACCCTGGGTTTTTTTTTAAGTTGTATCTAAATTTTTCTTGAAATAAAGATAAAAA  
TCGCAACTCGAGTTTGACTTTCCTTCTTCAAAGCGTGTAGTTTCCTTACTAAGACGAA  
TTTTTGATTCTGTAAACACCAGCATCTCCAGTAGCTTATCAGCTTTCAAACAAGCCCAA  
GAAAACGTCATTACGACGCTCGGTTTCGCCTTCTATGACAAAAGTCCGGTTTCTTTGGGA  
CAGCCCTC

--

>Btmar1.11.15\_gi-1092438700-gb-MAMS01007559\_1:-385432-386623

gi-1092438700-gb-MAMS01007559.1:-385432-386623 Bemisia tabaci isolate MEAM1 Scaffold39221, whole genome shotgun sequence 1192 bp

GTACGAGGGCTGTCCCAAAGAGACCGGACTTTTGTATAGAAGGCGAACCGAGCGTTGT  
AATGCAGTTTTCTTGGGCTTGTTTGAAAGCTGATAAGCTACTGAAGATGCTTGTTTTTAC  
AGAATGCATAAATTCGTCTTGGTAAGGAACTACACGCTTTGGAATAAAGGAAAGTCAAA  
CTCGAGTTGCGATTTTTGTCTTTATTTCAAGAAAAATATAGAGACAACTTAAAAACCCC  
TGGTTTTAAGTTGAAAACCTTCGTTGCTCTCTTCTTCAAATGCTTAAAAAAAAGGAAATTA  
ACATTTAACGCAGCTTACCAAGTCATCACCTATCCCCTTCAAATACTCGCCAGCTTTGT  
CGATGCATTTTTGCCACCGTTTCTTCAATTGGGAGAAACACTAATGGAATTCCTCAGGTT  
TGAATGATTGCAATTCCTTCAAGGTGTTCTTGAATTTCCGGAATGGTTTGAAAACGTC

GACCTTTT TAGGTAGATTTAAGTCGTGGAAATAAAAAAAAAATGACACGGAGCCAGGTCAG  
GTGAATAGGGGGGATGAGGGAGGACACTCATGGCATTCTTTGCACAAAATTCGCGAATTT  
GGAGGGATGCATGGGCAGGTGCATTATCGTGATGCAGAAACCAGGAATTCTCTTCCAAA  
GCTCGGGACATTTTCTGCGGACATTTTCGCGCAAACGTCTCAGAACACCATTGTAATATT  
CGCCATTGACAGTTTCTCCTTTCGGTAAAAATTCATGATGGACAATTCCTCGAACCTGAG  
GATTTCCAACAGTGTTTCTCCCAATTGAAGAACAGTGGCAAAAATGCATCGACAAAGCTG  
GCGAGTATTTTGAAGGAGATAAGTGATGACTTGGTAAGCTGCTTAAAATGTTAATATCCT  
TATTTTAAAGCATTTGAATAAGAGAACAACGAAGTTTTTAACTTAAACCTGGGTTTTTT  
TCAAGTTGTATCTAAATTTTCTTGAAATAAAGACAAAAATCGCAACTCGAGTTTGACTT  
TCCTTCATTCCAAAGCGTGTAGTTTCCTTACCAAGACGAATTTATGCATTCTGTAAAAAC  
AAGCATCTTCAAAGCTTATCAGCTTCAAACAAGCCCAAGAAAACCTGCATTACAACGCT  
CGGTTGCGCTTCTATGACAAAAGACCGGTTTCTTTGGGACAGCCCTCATAC

--

>Btmar1.11.16\_gi-1092425799-gb-MAMS01019739\_1-:124663-125850  
gi-1092425799-gb-MAMS01019739.1-:124663-125850 Bemisia tabaci isolate MEAM1 Scaffold9984,  
whole genome shotgun sequence 1188 bp

TACGAGGGCTGTCCCAAAGAAACCGGACTTTTGT CATAGAAGGCGAACCGAGCGTTGTA  
ATAAAGTTTTCTTGGGCTTGTTGAAAGCTGATAAGCTACCAGAGATGCTTGTTTTTACA  
GAATGCAAAAATTCGTCTTGTAAGGAACTACACGCCTTGAATAAAGGAAAGTCAGAC  
TCAAGTTGCGATTTTTGTGATATTTCAAGAAAAATTTAGATACATCTTTAAAAAAAACC  
CCAGGTTTAAAGTTAAAACTACGTTGCTCTTATTCAAATGCTGAAAGATAAGGAAAT  
TAACATTTTAAACAGTTCACCAAGTCATCACCTATCCCCTTCAAATACTCGCCAGCTTT  
GTCGATGAATTTTTGCCACCGTTTCTTAATTGGGAGAAACACTGTTTGAAATCCCGAGG  
TTTGAATGATCGCAATTCCTTCAAGGTGAACTGTCAATCGCGAATATTACAATGGTGTT  
CTGAGATGATTACGCGGAAATGTCCGCAGAAAAAGGCCCGAACTTTGGAGAGAGAATTTT  
TGGTTTCTGCATCACGAGATAATGCACCTGCCCATGCATCCCTCAAATTCGCGAATTTT  
GTGCAAAGAATGTCATGAGTGTCTCCCTTATCCCCCTTATTACCTGATCTGGCTTCGT  
GTGATTTTTTCTTATTTCCATGACTTAAATTTATCTTGAAAGATCGACGTTTTCAAACC  
ATTCCGGAATTCAAGAGAACACCTTGAAGGAATTGCGATCATTCAAACATCAGGATTTT  
AAACAGTGTTTCTCCCAATTGAAGAAACGCTGGCAAAAATGCATCGACAAAGCTGGCGAG

TGCTTTCAAGGGGATAGGTGATGACTTGGTGAGCTGCTTAAATTGTTAATTCCTTATTC  
TTAAGCATTTGAATAAGAGAGCAACGAAGTTTTTAACTTAAAACCTGGGGTTTTTTTAAA  
GATGTATCTAAATTCTTCTTGAAATATCGACAAAAATCGCAACTTGAGTCTGACTTTCCT  
TTATTCCGAAGCATGTAGTTTCCTTACCAAGACGAATTTTTGCATTCTGTAAAAACAAGC  
ATCTCTGGTAGCTTATCAGCTTTCAAACAAGCCCAAGAAAACCTTCATTACCACGCTCGGT  
TCGCCTTCTATGACACAAGTCTGGTTTCTTTTGGGACAGCCCTCGTAC

--

>Btmar1.11.17\_gi-1092442913-gb-MAMS01005707\_1-:266038-267215  
gi-1092442913-gb-MAMS01005707.1-:266038-267215 Bemisia tabaci isolate MEAM1 Scaffold3142,  
whole genome shotgun sequence 1178 bp

TACGAGGGCTGTCCCAAAAGAAACCGGACTTTTGTATAGAAGGCGAACAGAGCGTCGTA  
ATGAAGTTTTCTTGGGCTTGTTGAAAGCTGATAAGCTACTGAAGATGCTTGTTTTTACA  
GAATGCAAACATTGGTCTTGGTAAGGAACTACACGCTTTGGAATAAAGGAAAGTCAAAC  
TCGAGTTGCGATTTTTGTCTTTATTTCAAGAAAAATTTAGATACAACTCTAAAAAAAACC  
CAGGTTTTAAGTTAAAAACTTCGTTGCAATCTTATTCAAATGCTTAAAAATAAGGAAATC  
AACATTTTAAGCAGCTTACCAAGTCATCACCTATCCCCTTCAAAATATTCGCCAGCTTTG  
TCGATGCATTTTTGCCACCGTTTCTTCAATCGGGAGAAACACTGTTGAAAATCCGCAGGT  
TTGAATGATCGCAATTCCTTCAAGGTGAAACTGTCAACCGAGAATATTACAATGGTGTTCT  
TGAGACGATTACGCGAAAATGTCCGCAGAAAAAGGCCCGAGCTTTGGAGAGAGAATTCCT  
GGTTTCTGCATCACGATAATGCACCTGCCCAAGCATCCCTCCAAATTCGTGAATTTTGTG  
CAAAGAATGCCATGAGTGTCTCCCTCATCCCCTCTATTTACCTGACCTGGCTCCGTGTG  
ATTTTTCTTCACGACTTAAATCTACCTTGAAAGGTCTACGTTTTCAAACATTCCGGAA  
ATTCAAGAGAACACCTTGAAGGAATTGCGATCATTCAAACCTGAGGATTTCCAACAGTGT  
TTCTCCCAATTGAAGAAACGGTGGCAAAAATGCATCGACAAAGCTGGCGAGTATTTTGAA  
GGGGATAGGTGATGACTTGGTAAGCTGCTTAAAATGTTGATTTCTTATTTTTAAGCATT  
TGAATAAGATTGCAACGAAGTTTTTAACTTAAAACCTGGGTTTTTTTTAGAGTTGTATCT  
AAATTTTTCTTGAAATAAAGACAAAAATCGCAACTCGAGTTTGACTTTCCTTTATTCCAA  
AGCGTGTAGTTTCCTTACCAAGACCAATGTTTGCATTCTGTAAAAACAAGCATCTTCAGT  
AGCTTATCAGCTTTCAAACAAGCCCAAGAAAACCTTCATTACGACGCTCGGTTCGCCTTCT  
ATGACAAAAGTCCGGTTTCTTTTGGGACAGCCCTCGTA

--

>Btmar1.11.18\_gi-1092440840-gb-MAMS01006571\_1-:14487-15677

gi-1092440840-gb-MAMS01006571.1-:14487-15677 Bemisia tabaci isolate MEAM1 Scaffold3518, whole genome shotgun sequence 1191 bp

TACGAGGGCTGTCCCAAAGAAACCGGACTTTTGTATAGAAAGGCGAACCGAGCGTAATG  
CAGTTTTCTTGGGCTTGTTTGAAAGCTGATAAGCTACTAAAGATACTTGTTTTTACAGAA  
TGCATACATTCGTCTTGGTAAGGAACTACACGCTTTGGAATAAAGGAAAGTCAAACCTCG  
AGTTGCGATTTTTGTCTTTATTTCAAGAAATATATAGATACAACTTAAAAAACCCCTGGT  
TTTAAGTTGAAAACCTTCGTTGCTCTCTTCTTCAAATGCTTAAAAAAAAGGAAATTAACAT  
TTTAAGCAGCTTACCAAGTCATCACCTATCCCCTTCAAATACTCGCCAGCTTTGTCGAT  
GCATTTTTGCCACCGTTTCTTCAATCGGGAGAAACACTGTTGGAAATCCTCAGGTTTGAA  
TGATCGCAATTCCTTCAAGGTGCTCTCTTGAATTTCCGGAATGGTTTGAAAACGTCGACC  
TTTCAAGGTAGATTTAAGTCGTGGAAATAAGGGAAATCACACGGAGCTAGGTCAGGGGGA  
TAAGGGAGGACACTCATGGCATTCTTGCACAAAATTCGCGAATTTGGAGGGATGCATGG  
GCAGGTGCATTATCGTGATACAGAAACCAGGAATTCTCTCCCCAAAGCTCAGGCCTATTT  
TTCTGCGGACATTTTTGCGTAATCGTCTCAGAACACCATTGGAATATTCGCGATTGACAG  
TTTGTCCTTTCCGTAAATTCAAGAGAACACCTTGAAGGAATTGGGATCATTCAAACCTGA  
GGATTTCCAACAGTGTCTCTCCAATTGAAGAAACGGTGGCAAAAATTCATCGACAAAGC  
TGGCGAGTATTTTGAAGGGGATAGGTGATGACATGGTAAGCTGCTTAAAATTTTAATTC  
CTTATATTTAAGCATTTGAAGAAGAGAGCAACGAAGTTTTCAACTTAAAACCTGGGTTTC  
TTTTTAAGTTGTATCTAAATTTTTTTTGTACATAAAGACAAAAATCGCAACTCGAGTTTGA  
CTTCCTTTATTCAAAGCGTGAGTTTCTTACCAAGACGAATTTTGCATTCTGTAAA  
AACAAGCATCTTTAATAGCTTATCAGCTTTCAAACAAGCCCAAGAAAACCTTCATTACAAC  
GCTCGGTTTCGCTTCTATGACGAAAGTCCGGTTTCTTTTGGGACAACCTC

>Btmar1.11.19\_gi-1092441018-gb-MAMS01006501\_1-:91834-93015

gi-1092441018-gb-MAMS01006501.1-:91834-93015 Bemisia tabaci isolate MEAM1 Scaffold3488, whole genome shotgun sequence 1182 bp

TACGAGGGCTGTCCCAAAGAAACCGGACTTTTGTATAGAAAGGCGAACAGAGCGTCGTA  
ATGAAGTTTTCTTGGGCTTGTTTGAGAGCTGATAAGCTACTGAAGATGCTTGTTTTTACA

GAATGCAAACATTGGTCTTGGTAAGGAACTACACGCTTTGGAATAAAGGAAAGTCAAAC  
TCGAGTTTGGATTTTTGTCTTTATTTCAAGAAAAATTTGCTACAATTTAAAAAAAAAAAA  
CAGGTTTTAAGTTAAAACTTCGTTGCTCTCTATTCAAATGCTTAAAAATAAGGAAATC  
AACATTTTAAGCAGCTTACCAAGTCATCACCTATCCCCTTCAAAATATTCGCCAGCTTTG  
TCGATGCATTTTTGCCACCGTTTCTTCAATCGGGAGAAACACTGTTGAAAATCCGCAGGT  
TTGAATGATCGCAATTCCTTCAAGGTGAAACCGTCAACCGAGAATATTACAATGGTGTTT  
ATGAGACGATTACGCGAAAATGTCCGCAGAAAAAGGCCCGAGCTTTGGAGAGAGAATTCC  
TGGTTTCTGCATCACGATAATGCACCTGCCAAGTATCCCTCAAATTCGCGAATTTTGT  
GCAAAGAATGCCATGAGTGTCTCCCTCATCCCCTCTATTACCTGACCTGGCTTCGTGT  
GATTTTTTCTTCACGACTTAAATCTACCTTGAAAGGTGACGTTTTCAAACCATTCGGGA  
AATTCAAGAGAATACCTTGAAGGAATTGCGATCATTCAAACCTGAGGATTTCCAATAGTG  
TTTCTCCAATTGAAGAAACGGTGGCAAAAATGCATCGACAAAGCTGGCGAGTATTTTGA  
AGGGGATAGGTGATGACTTGGTAAGCTGCTTAAAATGTTGATTTCTTATTTTAAGCAT  
TTGAATAAGATTGCAACGAAGTTTTTAACTTAAACCTGGGTTTTTTTAAAGTTGTATCT  
AAATTTTTCTTGAAATAAAGACAAAAATCGCAACTCGAGTTTGACTTTCCTTATTCCAA  
AGCGTGTAAGTTTCTTACCAAGACCAATGTTTGCATTCTGTAAAAACAAGCATCTT  
CAGTAGCTTATCAGCTTTCAAACAAGCCCAAGAAAACTTCATTACGACGCTCGGTTGCC  
TTCTATGACAAAAGTCCGGTTTCTTTGGGACAGCCCTCGTA

>Btmar1.11.20\_gi-1092434474-gb-MAMS01011064\_1-:8895-10085  
gi-1092434474-gb-MAMS01011064.1-:8895-10085 Bemisia tabaci isolate MEAM1 Scaffold54472, whole  
genome shotgun sequence 1191 bp

TACGAGGGCTGTCCAAAAGAAACCGGACTTTTGTATAGAAGGCGAACCTAGCGTTGTA  
ATGAAGTTTTCTGGGCTTGTTTGAAGTTGATAAGCTACTGGAGATGCTGGTTTTTACG  
GAATGCAAAAATTCGTCTTAGTAAGGAACTACACACTTTGGAATAAAGGAAAGTCAAAC  
TCGAGTTGCGATTTTTATCTTTATTTCAAGAAAAATTAGATACAACTTAAAAACCCAGT  
TTTTAAGTTATAAACTTCGGTGCTCTTATTCAAATGCTTAAAAATAAGGAAATTAACA  
TTTTAAGCAGCTTATCAAGTCATCACCTATCCCCTTCAAATACTCGCCAGCTTTGTCAA  
TGCATTTTTGCCACCGTTTCTTCAATTGGGAGAAACACTGTTGGAAATCCTCAGGTTTGA  
ATGATCGCAATTCCTTCAAGGTGAACTGTCAATCGCGAATATTACAATGGTGTTCTAAG  
ACGATTACGCGAAAATGTCCGCAATGTCCGCTGAAAAAGGCCTGAGCTTTGGAGAGAAAA

TTCTGGTTTCTGCATCACGATAATGCACCTGCCCATGCATCCCTCCAAATTGGCGAATT  
TCGTGCAAAGAATGCCATGAGTGTCTCCCTCATCCCCCTTATTCACCTAACCTGGCTCC  
GTGTGATTCTTCCTTATTTCCACGACATAAATCTACCTTGAAAGATCGACGTTTTCAAAC  
CATTCTGGAAATTTAAGAGAATACCTTGAAGGAATTGCGATCATTCAAACCTGAGGATT  
CCAACACTGTTTCTCCAATTGAAGAAACGGTGGCAAAAATGCATCGACAAAACCTGGCGG  
GCATTTTGAAGGAGATAGGTGATGACTTAGTAAGCTGCTTGAAATATTAATTCCTTACC  
TACTTTTAAGCATTTGAATGAGAGCAACGAAGTTTTTAACTTAAATCCTAGGTATTTTTT  
TTAAGTTGTAGCTAAATTTTTCTTGAAATAAAGACAAAAATCGCAACTTGAGTTTGACTT  
TCCTTTATTCCAAAGCGTGTAGTTTCCTTACTAGGACGAATTTTTGCATTTTGAAAAAC  
CAGCATCTCCAGTAGCTCATCAGCTTTCAAACAAGCCCAAGAAAACTTCATTACGACGCT  
CGGTTACCTTCTATGACAAAAGTCCGGTTTCTTTGGGACAGCCCTCGTA

>Btmar1.11.21\_gi-1092448321-gb-MAMS01003128\_1-:1-1029

gi-1092448321-gb-MAMS01003128.1-:1-1029 Bemisia tabaci isolate MEAM1 Scaffold20933, whole  
genome shotgun sequence 1029 bp

ACTACACGCTTTGGAATAAAGGAAAGTCAAACCTCGAGTTGCGATTTTTGTCTTATTTTA  
AGAAAAATTTAGATACAACAGTAAAAAAAACCCAGGTTTTAAGTTAAAAAACTTCGTTGC  
AATCTTATTCAAATGCTTAAAAATAAGGAAATCAACATTTTAAGCAGCTTACCAAGTCAT  
CACCTATCCCCTTCAGAATACTCGCCAGCTTTGTCGATGCATTTTGCCACCGTTTCTTC  
AATTGGGAGAAACACTGTTGGAAATCCTCAGGTTTGAATGATCGCAATTCCTTCAAGGTG  
TTCTCTTGAATTTCCGGAATGGTTTGAAAACGTGACCTTTCAAGGTAGATTTAAGTCGT  
GAAGAAAAAATCACACGGAGCCAGGTCAGGTCAATAGAGGGGATGAGGGAGGACACTCAT  
GGCATTCTTTGCACAAAATTCGCGAATTTGGAGGGATGCTTGGGCAGGTGCATTATCGTG  
ATGCAGAAACCAGGAATTCTCTCTCAAAGCTCGGGCCTTTTTCTGCGGACATTTTCGCG  
TAATTGTCTCAGAACACCATTGTAAAATTCTCGGTTGACAGTTTCACCTGAAGGAATTG  
CGATCATTCAAACCTGCGGATTTTCAACAGTGTTTCTCCGATTGAAGAAACGGTGGCAA  
AAATGCATCCACAAAGCTGGCGAATATTTGAAGGGGATAGGTGATGACTTGGTAAGCTG  
CTTAAAATGTTGATTTCTTATTTTTAAGCATTGAATAAGAGAGCAACGAAGTTTTTAA  
CTTAAAACCTGGTTTTTTTTTTTAAAGTTATATCTAAATTTTTCTTGAAATAAAGACAAAA  
ATCCAAACTCGAGTTTGACTTTCCTTTATTCCAAAGCGTGTAGTTTCCTTACCAAGACCA  
ATGTTTGCATTCTGTAAAAACAAGCATCTTCAGTAGCTTATCAGCTTTCAAACAAGCCCA



AGAAAACCTTCATTACGACGCTCTGTTTGCCTTCTATGACAAAAGTCCGGTTTCTTTTGGG  
ACAGCCCTC

>Btmar1.11.22\_gi-1092437759-gb-MAMS01008035\_1-:1-788  
gi-1092437759-gb-MAMS01008035.1-:1-788 Bemisia tabaci isolate MEAM1 Scaffold41110, whole  
genome shotgun sequence 788 bp

ACTCGAGTTGCGATTTTTGTCTTTATTTCAAGAAAAATTTAGATACAACTTTAAAAAATA  
CCCAGGTTTTAAGTTAAAACTTCGTTGCTCTCTTATTCAAATGCTTAAAAATAAGGAAA  
TCAACATTTTAAGCAGCTTACCAAGTCATCACCTATCCCCTTCAAAATACTCGCCAGCTT  
TGTCGATGCATTTTTGCCACCGTTTCTTCAATTGAGAGAAACACTGTTGGAAATCCTCAG  
GTTTGAATGATCGCAATTCCTTCAAGGTGTTCTTGAATTTCCGGAATGGTTTGAAAAC  
GTCGACCTTTCAAGGTAGATTTAAGTCGTGAAGAAAAAATCACACGGAGCCAGGTCAGGT  
GAATAGAGGGGATGAGGGAGGACACTCATGGCATTCTTTGCACAAAATTTGCGAATTTGG  
AGGGATGCTTGGCAGGTGCATTATCGTGATGCAGAAACCAGGAATTCTCTCTCAAAGCT  
CGGGCCTTTTTCTGCGGACATTTTCGCGTAATCGTCTCAGAACACCATTGTAATATTCTC  
GGTTGACAGTTTCACCTTGAAGGAATTGCGATCATTCAAACCTGCGGATTTTAAACAGTG  
TTTCTCCCGATTGAAGAAACGGTGGCAAAAATGCATCGACAAAGCTGGCGAATATTTTGA  
AGGGGATAGGTGATGACTTGGAAGCTGCTTAAATGTTGATTTCTTATTTTAAGCAT  
TTGAATAGGAGAGCAACGAAGTTTTTAACTTAAACCTGGTTTTTTTTTTAAGTATTGT  
ATCTAAAT

--

>Btmar1.11.23\_gi-1092433352-gb-MAMS01012186\_1-:1-753  
gi-1092433352-gb-MAMS01012186.1-:1-753 Bemisia tabaci isolate MEAM1 Scaffold59187, whole  
genome shotgun sequence 753 bp

AAAATTTAGATACAACTTTAAAAAAAACCCAGGTTTTAAGTTAAAACTTCGTTGCTCT  
CTTATTCAAATGCTTAGAAATAAGGAAATTAATATTTTAAGCAGCTTACCAAGTCATCAC  
CTATCCCCTTCAAAATACTCGCCAGCTTTGTCGATGCATTTTTGCCACCGTTTCTTCAAT  
TGGGAGAACCACTGTTGGAAATCCTCAGGTTTGAATGATCGCAATTCCTTCAAGGTGTTT  
TCTTGAATTTCCGAATGGTTTGAAAACGTCGACCTTTAAGTCCTGAAAATAAGAAAAAAT  
CACACGGAGCAAGGTCAGGTGAATAAAGGGGATGAGAGAGGACACTCGTGGCATTCTTTG

CACAAATTCGCGAATTTGGAGGGATGCTTGGGCAGGTGCACTATCGTGATGCAGAAACCA  
GGAATTCTCTCTCCAAAGCTCGGGCCTTTTTCTGCGGACATTTTCGCGTAATCGTCTCAG  
AAGACCATTATAATATTCTCGGTTGACAGTTTCAGATTGAAGGAATTGCGATCATTCAAA  
CCTGCGGATTTTCAACAGTGTTTCTCCCAATTGAAGAAACAGTGGCAAAAATGCATCGAC  
AAAGCTGGCGAGTATTTTGAAGGAGATAGGTGATGACTTGGTACCTAAGGTGCTTAAAT  
GTTAATTTCTTATTTTTAAGCGTTTGAATAAGAAAGCAACGAAGTTTTTAACTTAAAC  
CTGGGTTTTTTTTTAAAGTTGTATCTAAATTTT

>Btmar1.12.1\_gi-1092453460-gb-MAMS01000794\_1-:2588495-2589459  
gi-1092453460-gb-MAMS01000794.1-:2588495-2589459 Bemisia tabaci isolate MEAM1 Scaffold1185,  
whole genome shotgun sequence 965 bp

TACGAGGTCTGTTAGATTAGAAACAGGATTTTGGTCTTAAATAGCCTACCTTCGTCCGA  
ATTAGGTAATCTTAACTTTTCTGATAGCTGAAAATATGCTTAAGAACGCTACGCTCACA  
AATTTGAAGAACTTAATTAGCTTTGTTGGTATGAGGCTTGAAGTAAGGCAACCTCATGG  
GTGCTCTGCGATTTTTATGTTTGACCAAACATGTCTCTTTTTTTCGGTCTTGCACTACA  
TTCTTCAATCCACGAGGATGATTGGAGTTTCGTCTCCATATCGTAGCCGGACACTCAAGT  
TTTGTCACCGAAAATTATCCTATCCAAAAATGTAGGATCATTGTCAGAACGTTTCGAGCAG  
CTATAGAGAAATTGACATTCGGTTGGATTTTTGTTCAACGGACAACAATCAAGGGGCATG  
TGTACCTGAAACTCGATGCATGTCTACATATTCTATCAAAATTGTATGTACAAAACAGAG  
CCTTCAGAAATATTACACTATTCAGCAAGCTCGAAACGACCATTTTCGAGCACTTTTTGT  
GCGCACTTCTCCACGTGACAAATGTCAGTTGCCGTTGATGGTCGATTCTCATGCTCCTC  
ATCTTCGACGAACTCCTGACCAGTTTTGAATCGTTTAACCCACTCATAACAGAGAGAACA  
ACTCAAACAATGATCTTGGTAACTTTACTTAGCATACTTAAAGTTTCGGTACAAGGTAT  
ACCGAGTTTAAACAAAATTTAATGTTAAATTTTTGCTCTATCAGTGATCGTGCGATGAA  
AATCGCAGAACGCACCTGACTTACTCGTATTAAAGGTGACATACTGATCAAAATAAACAA  
AATCTGTGAATCTAGCGTTCTTTAGTATGTTATCAGCTATCAAAAAAGTCCAAGGAAACC  
TAATTCGGACGCACACTGGGCTAGTTATCACCAAAATCCGGTTTCTAATCTAACAGACCT  
CGTAT

--

>Btmar1.12.2\_gi-1092455529-gb-MAMS01000026\_1-:6467613-6468254  
gi-1092455529-gb-MAMS01000026.1-:6467613-6468254 Bemisia tabaci isolate MEAM1 Scaffold15,  
whole genome shotgun sequence 642 bp

AATTATTGTATCCAAAAATGTAGGATAATTGTTAGAACGTTCAAGAAGCTCAAGGGAAAT  
TGACATTTGGTTGGATTTTTGTTGAATATACAATCACAGGACAAGTTTAGCTGAAACTCG  
ATGCATGTATAAATATTCTATCAAAATTGTATGTGCAGAGTCCTCAGAAATATCACACTG  
CCTAGAGAGCTCGAAACGACCATTTTCGAGGACTTTAGCCTGCATTTCAAAATGTTAGTT  
GCCGTTGATGGTCGATTCCCGTTCTCCTCATCTCCGACGGACTCCTGACCAGTTTTGAAC  
CGTTTAGGTCATTCAAACACTGAGATAACTTATAAAATGATCTTAGTAACTTTAGTTA  
ACATATCAAAGTTTTGGTACAAGGTATACTGAGTTTAAACAAAATTTAATGTTAAATC  
TTTGCTCTATCAGTGGTTGCATGAAAAAATCGCAGAACGCACCTGACTTGCTGGTATTC  
AAGGTGACACAGAATGAACACTGATCAAAGTAAACAAAATCCATGAATCTAGCGTTCTCC  
AGTATTTTATCAGCTATCAGGAAAGTCCAAGGAAACCTAATTTTGACGCAAAATGAGCTA  
ATTATCACCCAACCTCCGTTTCTTATCTAACAGACCTTGAT

--

>Btmar1.12.3\*\_gi-1092454111-gb-MAMS01000491\_1-:1196898-1197863  
gi-1092454111-gb-MAMS01000491.1-:1196898-1197863 Bemisia tabaci isolate MEAM1 Scaffold1090,  
whole genome shotgun sequence 966 bp

TACGAGGTCTGTTAGATTAGAAACCGGATTTTGGTCATAACTAGCCTACTGTGCGTCCAA  
ATTTAATTTTCTTGATCTTTCCTGATAGCTGAAAATATACTTAAGAACGCTACGTCCACA  
GATTTGAAAAATCTTAATTAGCTTCGTTGGTATGTGGCTTCAAGTACGGCAACCTCATAG  
GTGTTTTGCGATTTTATGTTTGACCGAACTTGTCTCTCTTTTTTCGGTCTTGCACTACA  
TTTTTCAATCCACAAGGATGATTGGAGTTTCGTCTCCGTATCTTAGCCGTACACTCAAGT  
ATTATACCGAAAATTATCCTATCCAAAAATGTAGGATCATTGTTAGCACGTTCAAGCAG  
CTATAGGGAAATTAACATTCGGTTGGATTTTGTTCAACGGACAACAATGAAGGGGCAAGT  
GTACCTGAAACTCGATGCATGTCTACATATTCATCAAAATTGTATATACAGAGCCTTCA  
GAAATATTACATTGTTGAGCAAGCTCGAAACGACGATTTTCGAGACTTTTGCCAGCACTT  
CTTCCATGTGACAAATGTTAGTTGCCGTTGATGGTCGATTCCCATGCTCCTCATCTTCAA  
CGAACTCCTGACCAGTTTTGAATCGTTTAACCCACTCAAATAGTGAGTACAACCTCATAT

AATGATCTTGGTAAACTTTACTTAGCATACCAAAAGTTTCGGTGCAAGGTATACCGAGCT  
TAGAACAAGATGTAATGTAAATCTTTGCTCTGTCAGTGATCGCATAATGAAAATCGCAA  
AACGCACCTGACTTCCTCGTATTCAAGATGACACAGAATAAACTGATCAACATAAACA  
AAATCTGTGAACGTAGCGTTCTTTAGTATGTTATCAGTTATCAGAAAAGTCCAAGAAACC  
CTAATTCGGACGCACAGCAAGCTAGTTATGCCCAAATCCGGTTTCTAATCTAACAGACC  
TCGTAT

--

>Btmar1.12.4\_gi-1092455378-gb-MAMS01000055\_1-:2861450-2862387  
gi-1092455378-gb-MAMS01000055.1-:2861450-2862387 Bemisia tabaci isolate MEAM1 Scaffold226,  
whole genome shotgun sequence 938 bp

TACGAGGTCTGTTAGATTAGAAACCGGATTTTGGTTATAACTAGCCTATTGTGCGTCCGA  
ATTGGGTTTTTTTGATATTTCTGATAGCTGAAAATATATTAAAGAACGCTACGTTCACA  
GATTTGAAGAATCTTAATAATGAACTTCGTTGGTATGTGGCTTCAAGTACGGTAACCTCA  
TGGGCGATTTTTATGTTTGACCGAACTTGTCTCTCTTTTTTCGGTCTTGCACTACATTTT  
TCAATCCACAAGGATGAATGGAGTTTCGTCTCCATATCGTGGCCGTACACTCAAGTATTG  
TCACCGAAAATTATCCTATCCAAATATGTAGGATCATCGTTAGAACGTTCAAGCAGCTAT  
AGGGAAATTAACATTTGGTTGGATTTTGTTCACGGACAACAATCAAGGGGGAAATGTAA  
TTGAACTCGATGCATGTCTACATATTCTATCAAAATTGTATGTACAGAGCCTTCAGAAA  
TATTACACTGTTGAGCAAGCTCGAAACGACCATTTTCGAGACTTTTGCCCGCACTTCTTC  
CACGTGACAAATGTCAGTTGCCGTTGAGGGTCGATTCCCATGCTCCTCATCCTCGACGAA  
CTCCTGACCAGTTTTGAATCGTTTAGCCCACTAAAAAAGTGAGAACAACTCATATAAGG  
ATCTAACTTCACTCAGCATACCAAAATCTTCGATACAAGGTATACCGAGCTTAAACAAA  
ATTCAATGTAAATCTTTGCGCTGGCAGTGATCGAATGATGAAAATCGCAGAACGCACCT  
GACTTCCTCGTATTCAAGATGACACAGAATAAAACAAAATCTGTGAACGTAGCGTTCTTTA  
TTATGTTCTAAGCTATCAGAAAAGCCCAAGAAAACCTAATTCGGATGCACAGTAAGCTAA  
TTATGACCAAAATCCGGTTTCTAATCTAACAACCTCG

>Btmar1.12.5\_gi-1092455378-gb-MAMS01000055\_1-:1783447-1784404  
gi-1092455378-gb-MAMS01000055.1-:1783447-1784404 Bemisia tabaci isolate MEAM1 Scaffold226,  
whole genome shotgun sequence 958 bp

TACGAGGTCTGTTAGGTAAGAAACCGGATTTTGGTGATAACTAGCCCATCATGCGTCCGA

ATTAAGTTTTCTGGACTTTCTTGATAGCTGAAAATATACTTAAGAACGCTACATTCACA  
AATTTAAAAAATCTCAATTAGCTTTATTGGTACGTGGTTTGAAGTAAGGCAACCTCATGG  
ATGTTCTGCAATTTTCACGTTTGACCAAACCTGTGCGCTCTTTTTTCGGTCTTGCACTACC  
TTTATCAACCCACACGGATGGTTGGAGTTTTGTCTCCATATAGTTTCCGTACACCCAAGT  
TCTATCAACGGAAATGATCATATCCAAAAATGTAGGATCAGTGTTAGAACGTTCAAGAAG  
CTCAAGGAAAATTTATTCTTGGTTGGATTTTTGTTCAACGGACAACAGTCTCGGGACAAG  
TTTAGCTGAAACTCGATGCATGTGTAAATATTCTATCAAAATTCTATGTACAGAGCCTTC  
AGAAATATCACACTGTTTCAGCAAGCTCGAAACGACCATTTTCGAGCACTTTTGCCCCCAT  
TTTTTCCACGTGGCAGATGTCAGGTGCCGTTGGTCGATTCCCATGCTCCTTATCTCCAAC  
GGACTCCTGACCAGTTTTGAACCGTTTAAACCACTCAAAACACTGAGAACAACCTCATACA  
ATGATCTTGGTACACTATACTTAGCATACCAAATGTTTTGATACAAGGTATGCCGAGTTC  
AAAATAAAATTTAATGATAAATCTTTGCTCTATCAGTGATTGCATGATGAAAATCGTAGA  
ACGCACCTGACTCCCTCGTATTCAAGGTGACACAGAATGAACACTGATCAAAATAAACAA  
AATCTGTAAATCTAGCGTTCTTTAGTATGTTATTAGCTATCAGGAAAGTCCAAGGAAACC  
TAATTTGGACACAAAATGCGCTAGTTATCACCAAAATCGGATTTCTTATCTAACAGAC

--

>Btmar1.12.6\_gi-1092440704-gb-MAMS01006626\_1-:712709-713673  
gi-1092440704-gb-MAMS01006626.1-:712709-713673 Bemisia tabaci isolate MEAM1 Scaffold3536,  
whole genome shotgun sequence 965 bp

TACGAGGTCTGTTAGATTGGAAACCGGATTTTGGTGATAACTAGCCCACAATGCTTCCGA  
ATTAGGTTTTCTGAACTTTCCTGATAGCTGAAAATACACTTAAGAACGCTACGTTCACA  
AATTTGAAAAATCCTGATTAGCTTCGTTGGTGTGTGAATTGAAGTAAGGCAACTTCATGG  
GTGTTCTGCGATTTTTATGTTTGACCGAACTTGTCTCTGTTTTTTGGTCTTGCACTACA  
TTTTTCAATCCACAAGGATGATTGAAGTTTCGTCTCCATATCATAGCCGTACAGTCAAGT  
ATTGTCACCGAAAATTATCCTATCCAAAAATGTATGATCGTTCTTAGAACGTTTAAGCAG  
CTAAAAGGAAATTGACATTCGGTTGGATTTTTGTTTGACGGACAACGATCAAGGGGCAAG  
AGTACCTGAAACTCGATGCATGTCTACATTCTGTCAAAATTGTATGTCCAGAACCTTCAG  
AAATATTACACTGGTCAGCAAGCTCGAAAGGACCATTTTCGAGCAATTCTGCCCCGCACTT  
CTCCACGTGACGAATGTCAGTTGCCGTTGATGGTCGATTCCCGTGCTCCTCATCTTCGA

TGAACTCCTGACCAATTTTGAATCGTTTAAACCACTCAAATAGTGAGAACAACATCATGC  
AATGATCTTGGTAAACTTTACTTAGCATACAAAAATTTCCGGTACAGGTATACCGGGTTT  
AAAATAAAATTTAATGTTGAATCTTTGCTATATCAGTGATCGCATGACAAAAATCGCAGA  
ACGCACCTGACTTACTCGTATTCATGATGAAACAGAATAAACTGATCAGAATAAACAA  
AATCTGTGAACCTAGCGTTCTTCAGTATGTTATTAGCCATCACAAAAGTTCAAGGAAACC  
GAATTCGGACGCACACTGGGCTAGTTATCACAAAATCCAGTTTTTTATCTAACAGACCT  
CGTAT

--

>Btmar1.12.7\_gi-1092428043-gb-MAMS01017495\_1-:2005894-2006847  
gi-1092428043-gb-MAMS01017495.1-:2005894-2006847 Bemisia tabaci isolate MEAM1 Scaffold831,  
whole genome shotgun sequence 954 bp

TACGAGGTCTGTTAGATTAGAAACCGGATTTTGGTCATAACTAGCCCACAATGCGTCCAA  
ATTACGTTTTCTTGAGCTTTTCTGATAGCTGAAAATATATTTAAGAACGCTACGTTTACA  
AATTTGAAAAAGCCAAATCAGCTTCGTTGGTATGTGGCTTGAAGTAAGGCAACCTCAAGG  
GTGTTTTGCGATTTTTATGTTTGACCGAACTTGTCTCTTTTTTTTCGGTCTTGCACTACA  
TTTTTCAACCCACAAGGACGATTGGAGTTTCGTCTCCATATCGTAGCCGTAACTAAAGT  
ATTGTCACCGAAAATTATCCTATCCAAAAATGTAGGATCATTGTTAGAACGTTCAAGCAG  
CTAAAGGGAAATTGACATTTGGTTGGATTTTCGTTCAACGGACAACAATCAAGGGGCAAA  
TGTACCTGAAACTCGATGTGTGTCTACATATTCTATCAAAATTGTACGTACAGAACCTTC  
AGAAATTAGACTCTGTTCAACAAGCTCGAAACGACCATTTCGAGCTTTTTTGCCCGAAC  
TTCTTTCACGTGACAAATGTCAGTTGCCGTTGAGGGTCGATTCCCATGCTCCTCATCTTT  
GACGAACTCCTGACCAGTTGTGAATCGTTTAAACCAATTCAAACAGTGGAACATCTCAT  
ACAATGATCATAGTAAACATTTACTTAGCATATACCAAAGTTTCGGTATAAGGTATACC  
GAGTTTAAAGCATAATTTAATGTTGAATCTTTGCTCTATCAGCGATCGTATGATGAAAAT  
CGCAAAACGCACCTGACTTACTCGCATTCAAGATGACACAGAATAAACAAAATCTGTGAA  
GGTAGCGTTCTTAAGTATATTTCCAGCTATCAGAAAAGCTCAAGAAAACCTAATTCGGAC  
GCATTGTGGGCTAGTTATGACCAAAAATCCGGTTTCTAATCTAACAGACCTCGTA

>Btmar1.12.8\_gi-1092428043-gb-MAMS01017495\_1-:6236095-6237060  
gi-1092428043-gb-MAMS01017495.1-:6236095-6237060 Bemisia tabaci isolate MEAM1 Scaffold831,  
whole genome shotgun sequence 966 bp

TACGAGGTCTATTAGATTAGAAACCGGATTTTGGTCATAACTAGCCCACAATGCGTCCAA  
ATTAGGTTTTCTTGGACTTTCCTGATAGCTGAAAATATACTTAAGAACGCTACATTCACA  
AATTTGAAAAATCCTAATTAGCTTCGTTCTTCATTGCTGTGTGGCTTGAAGTAGGGCAAC  
CTTATGGGTGTTCTGCGATTTTTATGTTTGACCGAACTTGCCTCTCTTTTTTCGGTCTTG  
CACTACAATTTTCAACCCACAAGGATGATTGGAGTTTCGTCTCCATATCGTAGCCGTACA  
CTCAAGTATTTTCAACGAAAATTATCCTATCCAAAAATGTAGGATCATTGTTAGAATGGT  
TAAGTAGCTAAAGGGAAATCCACATTTGGTTGGATTTTAGTTCAACAGACAACAATCAAG  
GGGCAAGTGTGCCTGAAACTCGATGCATGTCTATATATTCTATCAAAATTGTATGTGCAG  
AGCCTTCAGAAATATTACACTGTTTCAAGAACGACCATTTTCGAGCACTTTTGCCCGCATT  
TCTTCCACATGACAAATGTCAGTTGCTGTTGATGGTCGATTCCCTTGCTCCTCATCTTCG  
ACAACTGCTGATCAGTTTTGAATCGTTTAACCCACTCAAAACAAAGAGAACAACCTGATA  
CAATGATCTTGGTAACTTTACTTAGCATATCAAAAGTTTCGGTACAAGGTATACCGAGA  
TTAAACAAAATTTAATGTAAATTATTGCTCCATCAGTGATCGCATGATTAATCGCA  
GAACGCCCTTGAGGTTGCCTTACTTCAAGCCACATACCAACGAAGCTAACTAGGATTTTT  
CAAATTTGTGAACGTAGCGTTCTTAAATATATTTTCAGCTATCAGGAAAGTTGAAGAAAA  
CCTAATTCGGATGCATTGTGGGCTAGTTATGACCAAAATCCGGTTTCTAATCTAACAGAC  
CTTGTA

--

>Btmar1.12.9\_gi-1092430170-gb-MAMS01015368\_1-:9048-10009  
gi-1092430170-gb-MAMS01015368.1-:9048-10009 Bemisia tabaci isolate MEAM1 Scaffold735, whole  
genome shotgun sequence 962 bp

TATGAGGTCTATTAGAGTAGAAACCGATTTTGGTGATAACTAGCCCACAATGCGTCCAA  
ATTAGGTTTTTTTGGACTTTCCTGATAGCTGAAAATATACTTGAGAATGCTACATTCACA  
AATTTGAAAAATTCTAATTAACCTTCATTGGTATGTGGCTCGAAGTAAGGCAACCTCATGG  
GTGTTCTGCGATTTTTATGTGTGGCCGAACTTTCTCTTTTTTTTTTGGTCTTGCACTATA  
TTTTTCAACCTACAAGGATAAGTGGAGCCTTGTCTCCATATCGTAGCCTCACTCTCAAGT  
TTTGTACCCGAAAATTGTCCTATCAAAAAATGTAGGATCATTGTTAGAACGTTCAAGCAG  
TTAAAGAGAAATTGACATTGAATTTTGTCCAATAGACAACAATCAAGGGGCAAGGTGAC  
CTGAAACTTGATGCATGTCCACATATTCTATCAAAATTGTATGTACAGAGCTTTCAGAAA

TATTACACTATTTCAGCAAGCTCAAAACGACCACATTCCAGCACTTTTGCCCGCACTTCTT  
CCATGTGGCAAATGTCAGTTGCCGTTGATGGTCGATTCTCGTGCTCCTCATCTTTGACGG  
ACTCCTGGCCAGTTTTGCACATTTAACCTCTCAAAACAGTGAGAGCAACTCATACAATG  
ATCTTGTTGAACTTTACTTAGCATACCAAAAGTTTCGGTACAAGGTATACAGAGTTTAAA  
ACAAAATTCAATGTTAAATCTTTGCTCCATCAGTGATCGCATGATGAAAATTGCAGAACG  
CACCTGACTTACTTGAATGAAGGTGACACAGAATGAACACTCATCATGATAATCAAAAT  
CTGTGAATCTAGCGTTCGTAAGTATATTTCCAGCTCTCAGGAAAGTCCAAGAAAACCTAT  
TTCGGACGCATTGTGGGCTAGTTATCACCAAAATCCGGTTTCTAATCTAATAGACCTCGT  
AT

--

>Btmar1.12.10\_gi-1092428515-gb-MAMS01017023\_1-:414314-415265  
gi-1092428515-gb-MAMS01017023.1-:414314-415265 Bemisia tabaci isolate MEAM1 Scaffold809, whole  
genome shotgun sequence 952 bp

TACGAGGTCTGTTAGATTAGAAACCGGATTTTGCTCATAACTAGCCACAGTGTGTCCAA  
ATTACGTTTTCTTGAGCTTTTCTGATAGCTGAAAATATATTTAAGAACGCTACGTTCACA  
AATTTGAAACATCCTAATTAGCATCGTTGGTATGTGGCTTGAAGTAAGGCAACCTCAAGG  
GTGTTTTGCGATTTTTATGTTTGACCGAACTTGCTCTCTTTTTTCGGTCTTGCACTACA  
TTTTTCATCCACCTTCATATCGTAGCCGCACACTAAAGTATTGTCACCGAAAATTATCC  
TATCCAAAAATGTAGGATAATTGTTAGAACGTTCAAGCAGCTAAAGGGAAATTGACATTT  
GGTTGGATTTTCGTTCAACGGACAACAATCAAGGGTCAAGTGTACCTGAAACTCGATGCG  
TGTCTACATACTCTATCAAAATTGTACGTACAGAGCCTTCAGAAATATTATACTCTGTTG  
AACAAGCTCGAAACGACCATTTTCGAGCACTTTTGCCCGCAGTTCTTCACGTGACAAAT  
GTGAGTTGCCGTTGAGGGTCGATTCCCATGCTCCTCATTTTTGACGAACTCCTGACCACT  
TTTGAATCGTTTAACCCATTCAAAACAGTAGGAATATTTCATACAATGATCATGGTAAAC  
TTTACTTAGTATATACCAAAAGTTCCGGTACAAGGTATGCCGAGTTTAAAACAAAATTTA  
ATGTTGAATCTTTGCTCTATCAGTGATCGCATGACGAAAATCGCAAAACGCACCTGACTT  
ACTCGTATTCAAGACGACACAGAAAAAACACTGATCAAAATAAACAAAATCTGTGAACGT  
AGCGATCTTTAGTATATTTTCAGCTATCAGGGAAGCTGAAGAAAACCTAATTCAGACGCA  
TTGTGGGCTAATTATGACCAAAATTCGGTTTCTAATCTAACAGACCTCGTAT



>Btmar1.12.11\_gi-1092428515-gb-MAMS01017023\_1-:6609163-6610121  
gi-1092428515-gb-MAMS01017023.1-:6609163-6610121 Bemisia tabaci isolate MEAM1 Scaffold809,  
whole genome shotgun sequence 959 bp

TACGAGGTCTGTTTGATTAGAAACCGGATTTTCGGTCATAACTAGCCCACAATAGGTCCGA  
ATTAGGTTTTCTTAATTTTCTGATAGCTGGAATATACTTAAGAACGCTACCTTCGCA  
AATTTGAAAAATCCTAATAAGCTTTGTTGGTATGTGGCTTGAAGTAAGGCAACCTCATGG  
GTATTCTGCAATTTTATGTTTGACCGAACTCGCCTCTCTTTTTTCGGTCTTGCACTACA  
TTTTTCAAACCACAAAGATGATTGGAGTTTTGCCTCCATATCGTAGCCGTACACTCAAGT  
ATTGTCACCGAAAATTATCCTATCCGAAAATGTAGGATCATTGTTAGAACGTTCAAGCAG  
CAAAAGGGAAATTGACATTTGGTTGGATTTTGTTCACGGACAACAATCAAGGGGCAAG  
TGTACCTGAAACTCGATGCATATCTATATATTCTATCAACATTGTATGTACAGAGCCTTC  
AGAAATATTGCACTGTTGAGCAAGCTCGAAACGACCATTTTCGAGCACTTTAGCCCGCAC  
TTCTTCAAATGTTAGTTGCCGTTGATGGTCGATTCCCATGCTCCTCATCTTCAACGACC  
TCTTGTCCAGTTTGAATCGTCTAACCCACTCAAAACAGTGAGGACAACCTCATACAATGA  
TCTTGGTAACTTTACTTAGCATACCAAAAGTTTCGGTACATGTATACGGAGTTTAAAC  
AAAATTTAATGTTAAATTTTGTCTATCAGTGATTGCATGATGAACATCGCAGAACGCA  
CCTAACTTACTCGTATTCAAGATGATACAGAATAAACACTGATCAAAATCAACAAAATCT  
GTGAACGTAGCGTTCTTCAGTATGTTATCAGCTATCAGGAAAGTTCAAGAAAACCTAATT  
CGGACGCATTGTGGGCTAGTTATGACCAAAATCCAGTTTCTAATCTAACAGATCTCGTA

--

>Btmar1.12.12\_gi-1092441835-gb-MAMS01006152\_1-:340838-341803  
gi-1092441835-gb-MAMS01006152.1-:340838-341803 Bemisia tabaci isolate MEAM1 Scaffold3332,  
whole genome shotgun sequence 966 bp

TACGAGGTCTGTTAGATTAGAAACCGGATTTTGGTCATAACTAGCCCACAATGCGTCCAA  
ATTACGTTTTCTTGAGCTTTTCTGATAGCTGAAAATATATTTAAGAACGCCACGTTCA  
AATTTGAAAAATCATAATTACTTTGTTGGTATGTGGCTTGAAGAAAGGCAACCTCAAGGG  
TGTTTTGCGATTTTATGTTTGACCAAACCTGTCTCTCTTTTTTCGGTCTTGCACTACAT  
TTTTCAACCCACAAGGACGATTGGAGTTTCGTCTTCATATCGTAGCCGTACAATAAAGTA  
TTGTCACCGAAAATTATCCTACCAAAAATGTAGGATCATTGTTAGAACGTTCAAGCAGCT

AAAGGGAAATTAACGTTTGGTTGGATTTTCGTTCAACGGACAACAATCAAGGGGCAAGTG  
TACCTGAAACTCGATGCGTGTCTACATATTCTATCAAAATTGTATGTTTCAGAGCCTTCAG  
AAATACTACTATGTTCAACAAGCTCAAACGACCATTTTCGAGCACTTTTGCCCGCACTT  
CTCCACGTGACAAATGTCAGTTGCCGTTGAGGGTCGATTCCCATACTCCTCATCTTCGA  
CGAACTCCTGACCAGTTTTGAATCGTCTAACCCACTCAAACAGTGGGAACATCTCATAC  
AATGATCTTGGTAACTTCACTTAGCATACCAAAGTTTCGGTACAAGGTATACCGAGTT  
TAAAACAAAATTAAGTGTTGAGTCTTTGCTCTATCAGTGTTTCGCATGCTGAAAATCGCAA  
AACGCACCTGACTTACTCGTATTCAAGATGACACAGAATAAACACTGATCAAAATAAACAA  
AAATCTGTGAACGTAGCGTTCTTATGTATATTTCCAGCTATCAGGAAAGCTCAAGAAAAC  
CTAATTCGGACGCATTGTGGGCTAGTTATGACCAAAATCCGGTTTCTAATCTAACAGACC  
TCGTAT

--

>Btmar1.12.13\_gi-1092454650-gb-MAMS01000255\_1-:269747-270710  
gi-1092454650-gb-MAMS01000255.1-:269747-270710 Bemisia tabaci isolate MEAM1 Scaffold98, whole  
genome shotgun sequence 964 bp

TACGGGGTCTGTTAGATTAGAAACCGGATTTTGGTCACAAGTAGCCACAAATGCGTCCAA  
ATTCCGTTTTCTTGAGCTTTTCTGATAGCTGAAAATATATTTAAGAACGCTACGTTCAACA  
AATTTGAAAAATCCTAATTAGCTTCGTTGGTATGTGGCTTGAAGTAAGGCAACCTCAAGA  
ATGTTTTGCGATTTTTATGTTTGACCGAACTTGTCTCTTTTTTCGGTCTTGCACTACA  
TTTTTCAACCCACAAGGACGATTGGAGTTTCGTCTCCACATCGTAGCCGTACACTAAAGT  
ATTGTCACCGAAAATTTTCTATCCAAAAATGTAGGATCATTGTCAAACGTTCAAGCAG  
CTAAAGGGAAATTGACATTTTGTGGATTTTCGTTCAACGGACAACAATCAAGGTTCAAG  
TGTACCTACCTGAAACTCGATGCGTGTCTACATATTCTATCAAAATTGTATGGACAGAGC  
CCTCAGAAATATTACTCTGTTCAACAAGCGGGAAACGACCATTTTCGAGCACTTTTCCCG  
CACTTCTCCACGTGACAAATGTCAGTTGCCGTTTAGGGTCGATTCCCATGCTCCTCATC  
TTTGACGAACTCCTGACCAGTTTTGAATCGTTTAACCCATTCAAACAGTGGGAACATCT  
CATACAATGATCATGGTAAAATTTACTTAGCATATACCAAAGTTTCGGTACGAGGTATA  
CCGAGAAAATTTAATGTTGAATCTTTGCTCTATCAGTGATCGCATGATGAAAATCGCAAA  
ACGCACCTGACTTACTCGTATTCAAGATGACACAGAATAAACACTGATCAAAATAAACAA

AATCTGTGAACGTAGCGTTCTTAAGTATATTTCCAGCTATCAGAAAAGCTCAAGAAAACC  
TAATTCGGACGCATTGTGGGCTAGTTATGACCAAAATCCGGTTTCTAATCTAACAGACCT  
CGTA

--

>Btmar1.12.14\_gi-1092454908-gb-MAMS01000185\_1-:112063-113010  
gi-1092454908-gb-MAMS01000185.1-:112063-113010 Bemisia tabaci isolate MEAM1 Scaffold591, whole  
genome shotgun sequence 948 bp

TACGAGGTCTGTTAGATAAGAAACAGGATTTTGGTGATACTAGTACATCATGCGGCCGA  
ATTATGTTTCCTTGGACTTTCTTGATAGCTGAAAATATACTTGAGAACGCTACATTCACG  
AATTTGTAAAATTTAATTAGCTTTGTTGGTAAGTGGTTTGAAGTAAAGCAACCTCATGG  
GTGTTCAAGCGATTTTCACGTATGACCAAACCTTTCGCTCTTTTTTTGGTCTTGACAACC  
TTTTTCAACCCGCACGGATGGTTGGAGTTTTGTCTCCATATTGTAGCCGCACTTCAAATT  
AGTCAACGGAAATTATCTTATCCAAAAATGCAGGATCATTGTCAGAACGTTCAAGAAGCT  
CAAGGAAAATTTACACTTGGTTGGATTTTTGTTCAACGGACAACAGTCGCGGGACAAGTT  
TAGCTGAAACTCGATGCATGTGTAAATATTCTATCAAAATTGTATGTACGTACAGAGCCC  
TCAGCAAGCTCGAAACGACCATTTTCGAGCACTTTTGCCCCCACTTTTTCCGCGTGTCAA  
ATGTCAGGTGCCATTGATGGTCGATTCCCGTGCTCCTCATCTTCGACAAACTCCTGACCA  
GTTTTGAACCATTTAAACCGTTTAAAACTCTAAGAACAACCTATACAATGATCTTGGTAA  
ACTTTACTTAGCATACCAAAAGTTTCGATACAAGGTATACCGAGTTCAAAATAAAATTTA  
ATGATAAATCTTTGCTCTATCAGTGATCGCATGATGTAAATTGCAGAACGCCCTGACTT  
ACTCGTATTCAAGGTGACACAGAATGAACACTGATCAAAATAAGCAAAATCTGTGAATCT  
AGCGTTCTTTAGTAAGCTATCAGCTATCAGGAAATTCCAAGAAAACCTAATTCGGATGCA  
CAATGCGCTGGTTATCACCAAAATCCGGTTTCTTATCTAACAGACCTC

--

>Btmar1.12.15\_gi-1092454059-gb-MAMS01000515\_1-:84761-85724  
gi-1092454059-gb-MAMS01000515.1-:84761-85724 Bemisia tabaci isolate MEAM1 Scaffold1098, whole  
genome shotgun sequence 964 bp

TACGAGGTCTGTTAGATTAGAAACCGGATTTTGGTCATACTAGCCCACAATGCGTCCAA  
ATTACGTTTCCTTGAGCTTTTCTGATAGCTGGAAATATACGTAAGAACGCTACGTTGCA  
AGTTTGAAAAATCCTAATGAGCTTCGTTGGTATGTGGCTTGAAGTAAGGCAACTTCAAGG

GTGTTTTGCGGTTTTTATGTTTCACCGAACTTGCTCTCTTTTTTCGGTCTTGCACTACA  
TTTTTCAACCCACAAGGACGATTGGAGTTTTGTCTCCATATCGTAGCCGTACACTAAAAT  
ATTGTCACCGATAATTATCCTATCCAAAAATGTAGGATTTGAACGTTCAAGCAGCTAAAG  
GGAAATTGACATTTGGTTGGATTTTCGTTCAACGGACAACAATCAAGGGGCAAGTGTACC  
TGAAACTCGATGCGTGTCTACATATTCTATCAAAATTGTATGTACAGAGCCTTCAGTAAT  
ATTACTCTGTTCAACAAGCTCGAAACGACCGTTTTTCGAGCACTTTTGCCCGCATTCTTC  
CACGTGACAAATGTCAGTTGCCGTTGAGGGTCGATTCCCATGCTCCTCATCTTTGACGAA  
CTCCTGACCAGTTTTGAATTGTTTAACTCATTCAAAACAGTGGGAACATCTCATACAATG  
ATCATGGTAACTTTACTTAGCGTATACCAAATGTTTTGGTACAAGGTATACCGAGTTTA  
AAACAAAATTTAATGTTGAATCTTTGTTCTATCAGTGATCGCATGATGAAAATCGCAAAA  
CGCACCTGACTTACTCGTATTCAAGATGACACAGAATAAACACTGATCAAAATAAACAAA  
ATCTGTGAAAGTAGCGTTCTTAAGTATATTTCCAGCTATCAGAAAAGCTCAAGAAAACGT  
AATTTGGACGCATTGTGGGCTAGTTATGACCAAAATCCGTTTTCTAATCTAACATACCTC  
GTAT

--

>Btmar1.12.16\_gi-1092425808-gb-MAMS01019730\_1-:3672646-3673593  
gi-1092425808-gb-MAMS01019730.1-:3672646-3673593 Bemisia tabaci isolate MEAM1 Scaffold995,  
whole genome shotgun sequence 948 bp

TACGAGGTCTGTTAGATTAGAAACCGGATTCTGGTGATAACTAGCCCACAATGCGTCGGA  
ATTAGGTTTTCTGAACTTTCCTGATAGCTGGAAATATACTTAAGAATGCTACATTCACA  
ACTTTGAAAAATCCTAATTTGCTTCGTTGGTATTTGGGTTGAAGTAAGGCAACCTCATGG  
GTGTTCTGCGATTTTCATGTTTGATCGAACTCGTTTCTTTTTTTTTTCGGTCTAGCACCAC  
CTTTTTCAACCCACAAGGATGCTTTGAGTTTCGTCTTCATATCGTAGCCGTACACTCAAG  
TTTTGTCACCGAAAATTATCCTATCAAAAAATGTAGGATTATTGTCAGAACGTTCAAGCA  
GCTAAAGGGAAATTGACGTTTGGTTGGATTTTTGTTCAACAGACAACAATCAAGGGGCAA  
GTGTACCTGAAAATCGATGTATGTCTACATATTCTATCAAAATTGTACGTACAGAGCCTT  
CAGAAATATTACACTGTTGAGCAAGCTCGAAACGACCATTTTCGAGCACTTTTGCCACACA  
CTTCTTCCTTTTGGCAAATGTCAGTTGCTGTTGATGGTCGATTCCCGTGCTACTCATCTT  
GGACTGACTCCTGGCCAGTTTTGCACCTTTTAACCCTCTCAAAACAGTTAAAACAACCTCA  
TACAATGATCTTGGTAACTTTACTTAGCATACCAAAAGTATTATTAAATTAAGTTTGAA

GTAATCTAATGTAAATCTTTGCTCTATCAGCGATCGTATGATGAAAATCGCAGAACGCA  
CCTGACTTGCTCGTATTCAAGGTGACACAGAATGAACACTGAATAAACAAAATCTGTGAA  
TGTAGCGTTGGCCAGTTTGTATTAGCCATCAGAAAAGTCCAAGGAAACCTAATTCGGGC  
GCAGAATGGGCTAGTTATCACCAAAATCCGGTTTCTAATCTTACAGAC

--

>Btmar1.12.17\_gi-1092454709-gb-MAMS01000236\_1-:1392262-1393225  
gi-1092454709-gb-MAMS01000236.1-:1392262-1393225 Bemisia tabaci isolate MEAM1 Scaffold707,  
whole genome shotgun sequence 964 bp

TACGAGGTCTGTTAGATTAGAAATCGGATTTTGGTGATAACTAGCCAACAATGCGTCCGA  
ATTAAGTTTTCTTGACTTTCCTGATAGCTGGAAATATACTTAAGAACACTACAATCACA  
AATTTGAAAAATCCTAATTAGCTTCGTTGATATGTAGCTTGAAGTGAGGCGACCTCATGG  
GTGTTCTGCGATTTTTATGTTGACCAAACCTGTCTCTTTTTTCGGCCTTGCACTACAATT  
TTCAACCGACAAGGATGATTAGAGTTTCATCTCCATATCGTAGCCGTACTCTCAAGTTTT  
GTCACCGAAAATTATCCTAACCAAAAATGTGGGATCACTGTTAGAACGTTCAAGCAGCTA  
AAGGGAAATTGACATTCGGTTGGATTTTTGTTCAACAGACAACAATCAAAGGGCAAGTGT  
ACCTGAAACTCGATGCATGTCTACATATTGTATCAAATTGTACGTACAGAGCCTTCCAA  
AATATTACACTGATCAGCAAGTTCGAAACGACCATTTTCGAGCACTTTTGCCCGCACTTC  
TTCCACATGGCAAATGTCAGTTGCCATTGATGGTCGATTCCCATGCTCCTCATCTTCGGC  
GGACTCCTGACCAGTTTTGCATCGTTTAACCCACTCGAAACAGTGAGAACAACCTCATACA  
ATGATCTTGGTAACTTTACTTAACATACCAAAAGTTTCAGTTCAAGGTATACCAAGTTT  
AAAACAAAATTTAATGTGAACTCTTTGCTGTATCAGTGATCGCATTATGAAAATCGCAGA  
ACGCATCTGACTTACTCGTATTCAAGGTGACACAGAATGAAAACCTGATCATAATAAACAA  
AATCTGTGAACCTAGCGTTCTTAAGTATATTTTCAGCTATCAGGAAAGTCCAAAAAAACC  
AAATTCGGATGCATTGTGGGCCAGTTATCACCAAAATCTGGTTTCTAATCTAATAGACCT  
CGTA

>Btmar1.13.1\_gi-1092455329-gb-MAMS01000074\_1-:5396264-5397134  
gi-1092455329-gb-MAMS01000074.1-:5396264-5397134 Bemisia tabaci isolate MEAM1 Scaffold27,  
whole genome shotgun sequence 871 bp

TACGAGGGGTGTCCAAAAGAAACCGGACTTTTGTATAGAAGGCGAACCGAGGGTCGTA  
ATGAAGTTTTCTTGGGCTTGTTGAAAGCTGATAAGCTACTGGAGATGCTGGTCTTTACA

GAATGCAAAAATTCGTCTTAGTACGGAACTACACGCTTTGGAATGAAGGAAAAGTCAAAC  
TCGAGTTGCGATTTTTATCTTTATTTCAAGAAAAATTTAGATACAACTTAAAAAAAACCC  
AGGTTTTAAGTTATAAACTTCATTGCTCTCTTATTCAAATGCTTAAAAATAAGGAAATTA  
ACATTTTATAAGCAGCTTACCAAGTCATCACCTATCCCCTTCAAAATACTAGCCAGCTTT  
GTCGATGCATATTTGCCACCGTTTCTCAATTGGGAGAAACACTGTTGGAAATCCTCAGG  
TTTGAATGATCGCAATTCCTCAAGGTGAACTGTCAATCGCGAATATTACAATGGTGTT  
CTGAGACGATTACGCGAAAATGTCCGCAGAAAAAGGCCTGAGCTTTGGAGAGAGAATTCC  
TGGTTTCTGCATCACTATAATGCACCTGCCCATGCATCCCTCCAAATTGGCGAATTTTGT  
GCTATAAGAATGCCATGAGTGTCTCCCCCTTATTCACCTAACCTGGCTCCGTGTGATTTT  
TTCTTATTTCCATGACTTAAATCTACCTTGAAAGGTGCGACGTTTTCAAACCATTCGGAA  
ATTCAAGAGATCACCTGAAGGAATTGCGATCATTCAAACCTGAGGATTTCCAACAGTGT  
TTCTCCCAATTGAAGAAACGGTGGCAAATATGCATCGACAAAGCTGGCTAGTATTTTGAA  
GGGGATAGGTGATGACTTGGTAAGCTGCTTA

--

>Btmar1.13.2\_gi-1092428515-gb-MAMS01017023\_1-:5308584-5309758  
gi-1092428515-gb-MAMS01017023.1-:5308584-5309758 Bemisia tabaci isolate MEAM1 Scaffold809,  
whole genome shotgun sequence 1175 bp

TACGAGGGCTGTCCCAAAGAAACCGGACTTTTGTCTAGAGGGCGAAACGAGCGTCGTA  
ATGAAGTTTTCTTGGGCTTGTTGAAAGCTGATAAGCTACTGGAGATACTGGTTTTTACA  
GAATGCAAAAATTCGTCTTGGTAAGGAACTACACGCTTTGGAATAAAGGAAAAGTCAAAC  
TCGAGTTGCGATTTTTGTCTTTATTTCAAGAAAAATTTAGATACAACTTAAAAAAAACCCA  
GGTTTTACGTAAAAAATTCGTTGCTCTCACTCAAATGCTTAAAAGTAAGGAAATTAACA  
TTTTAAGCAGCTTACCAAGTCATCACCTATCCCCTTCAAAATACTCGCCAGCTTTGTCGA  
TGCATTTTTGCCACTGTTTCTTCAATTGGGAGAAACACTGTAGGAAATCCTCAGGTTTGA  
ATGATCGCAATTCCTTCAAGGTGAACTGTCAATCGCGAATATTACAATGGTGTTCTGAG  
ACGATTAAGCGAAAATGTCCGCAGAAAAAGGCCTGAGCTTTGGAGAGAGAATTCCTGCTT  
TCTGCATCACGATAGTGCACCTGCCCATGCATCCCTCCAAATTGGCGAATTTTGTGCAAA  
GAATGCCATGAGTGTCTCCCTCATCCCCCTTATTCACCTAACCTGGCTCCGTGTGATTT  
TTTATTATTTCCACGACTTAAATCTACCTTGAAAGGTGCGACGTTTTCAAACCATTCGGGA  
AATTCAAAAGAACACCTTGAAGGAATTGCGATCATTCAAACCTGAGGATTTCTACAGTG

TTTCTCCAATTGAAGAAATGGTGGCAAAAATGCATCGACAAAGCTGGCGAGTATTTTGA  
AGGGGATAGGTGATGACTTGGTAAGCTGCTTAAAATGTTAATTTCTTACTTTTAAGCAT  
TTGAATGAGAGCATCGAAGTTTTTAACTTAAAACCTGGGTTTCTTTAAGTTGTATCTAAA  
TTTTTCTTGAAATGAAGACAAAAATCGCAACTCGAGTTTGACTTTCCTTTATTCCAAAGC  
GTATAGTTTCCTTACCAAGACGAATTTTTGCATTCTTTAAAAACCAGTATCTCCAGTAGC  
TTATCAGCTTTCAAACAAGCCCCAAAAAACTTCATTACGACGCTCGCTTCGCCCTCTATG  
ACAAAAGTCCGGTTTCTTTTGGGACAGCCCTCGTA

--

>Btmar1.13.3\_gi-1092455529-gb-MAMS01000026\_1-:2839730-2840904  
gi-1092455529-gb-MAMS01000026.1-:2839730-2840904 Bemisia tabaci isolate MEAM1 Scaffold15,  
whole genome shotgun sequence 1175 bp

TACGAGGGCTGTCCCAAAAGAAACCAGACTTTTGTATAGAAGGCAAACCAAGCGTCGTA  
ATGAAGCTTCTTCGGCTTGTTGAAAGCTGATAAGCTACTGGAGATGCTTGTTCTTACA  
GAATGCAAAAATTCGTCTTGGAAGGAACTAGACGCTCTGGAATAAAGGAAAGTCAAAC  
TTGAGTTGCGATTTTTGTCTTTATTTCAAGAAAAATTGAGATACAACCTAAAAAAAACCC  
AGGTTTTCAAGTAAAACTTCGTTGCTCTCTTATTCAAATGTTTAAAAATAAGGGAATTA  
ACATTTTAAGCAGCTTACCCAATCATCACCTATCCCCTTCAAATACTCACCAGCTTTGT  
CGATGCATTTTTGCCACCGTTTCTCAATTGGGAGAAACACTGTTGGAAATCCTCAGGTT  
CGAGGAGTTTTCCATCATGAATTTTTACCGAAAGGAGAAACTGTAAATCGCGAATATTAC  
AATGGTGCTCTGAGACGATTACGTGAAAATGTCCGCAGAAAAAGGCCCGAGCTTTGGAGA  
GAGAATTCCTGGTTTCTGTATCACGATAATGCACCTGCCCATGCATCCCTCCAAATTCGC  
GAATTTTGTCAAAAAATGCCATGAGTGTCTCCCTCATCCCCCTTATTCACCTGACCTG  
GCTCTGGCTGATGTTTTCTTATTTCCACGACTTAAATCTACCTGAAAGGTCGACGATT  
CAAACCATTCGGAAATTCAAGAGAACACCTGAAGGAATTGCGATCATTCAAACCTAAG  
GATTTCCAACAGTGTTTCTCCAATTGAAGAAACGGTGGCAAAAATGCATCGACAAAGCT  
GGCGAGTATTTGAAGGGGATAGGTGATGACTTGGTAAGCTGCTTAAAATGTTAATTTCC  
TTATTTTAAAGCATTTGAATAAGAGAGCAACGAAGTTTATAACTTAAAACCTGGGTTTTT  
TTAAAGTTGTATCCAAATTTTTCTTGAAATAAAGACAAAAATCGCAACTCGAGTTTGACT  
TTCCTTTATTTCAAAGCGTGTAGTTTCCTTACCAAGACGAATTTTTGCATTCTGTAAAAA  
CAAGCATCTCCAGTAGCTTATCAGCTTTCAAACAAGCCCAAGAAAGCTTCATTACAACGC

TCAGTTTGCCTTCTATGACAAAAGTCCGGTTTCTT

--

>Btmar1.13.4\_gi-1092434463-gb-MAMS01011075\_1-:206878-207862  
gi-1092434463-gb-MAMS01011075.1-:206878-207862 Bemisia tabaci isolate MEAM1 Scaffold5453,  
whole genome shotgun sequence 985 bp

GTACGAGGGCTGTCCCAAAGAAACCAGACTTTTGTTCATGGAAGGCGAACCGAGCGTCGT  
AATGAAGTTTTCTTGGGTTTGTGTTGAAAGCTGATAAGCTACTGATAAGCTAGCTGATGCT  
TGTTTTTACAGAATGCAAACATCCGTCTTGGTAAGGAACTACACGCTTGGAATAAAGGA  
AAGTCAAACCTCGAGTTGCGCGATTTTTGTCTTTATTTCAAGGAAAATTTAGATACAACCT  
TAAAAAAAAAACCAGGTTTTAAGTTAAAAACTTCGTTGCTTTCTTATTCAAATGCTTAAA  
AATAAGGAAATTAACATTTTAAGCAGCTCAGGTACCAAGTCATCACCTATCCCCTTCAAA  
ATACTCGCCAGCTTTGTTCGATGCATTTTGGCCACCGTTTCTTCAATTGGGAGAAACACTG  
TTGAAAATCCGCAGGTTTGAGTGATCGTAATTCCTCAATCTGAAACTGTCAACCGAGAA  
TATTACAATGGTCTTCTGAGACGATTACGCGAAAATGTCCGCAGAAAAAGGCCCGAGCTT  
TGGAGAGAGAATTCCTGGTTTCTGCATCACGATAATGCACCTGCCCAAGCATCCCTCCAA  
ATTCGCGGATTTGTGCAAAGAATGCCACGAGTGTCTCTCATCATCTTTATTCACCTG  
ACCTTGCTCCGTGTGATTTCTTCTTATTTTACGACTTAAATCTACCTTGAAAGGTCGAC  
GTTTTCAAACCATTTCGAAATTCAAGAGAACACCTTGAAAGAATTGCGATCATTCAAACC  
TGAGGATTTCCAACAGTGGTTCTCCCAATTGAAGAAACGGTGGCAAAAATGCATCGACAA  
AGCTGGCGAGTATTTTGAAGGGGATAGGTGATGACTTGGTACCTAAGCTGCTTAAAATGT  
TAATTCCTTATTTTTAAGCATTTGAATAAGAAAGCAACGAAGTTTTTAACTTAAACCT  
GGTTTTTTTTTTAAAGTTGTATCTA

--

>Btmar1.13.5\_gi-1092434463-gb-MAMS01011075\_1-:206918-207865  
gi-1092434463-gb-MAMS01011075.1-:206918-207865 Bemisia tabaci isolate MEAM1 Scaffold5453,  
whole genome shotgun sequence 948 bp

GAAGGCGAACCGAGCGTCGTAATGAAGTTTTCTTGGGTTTGTGTTGAAAGCTGATAAGCTA  
CTGATAAGCTAGCTGATGCTTGTGTTTTACAGAATGCAAACATCCGTCTTGGTAAGGAAAC  
TACACGCTTGGAATAAAGGAAAGTCAAACCTCGAGTTGCGCGATTTTTGTCTTTATTTCAA  
GGAAAATTTAGATACAACCTTAAAAAAAAAACCAGGTTTTAAGTTAAAAACTTCGTTGCT



TTCTTATTCAAATGCTTAAAAATAAGGAAATTAACATTTTAAGCAGCTCAGGTACCAAGT  
CATCACCTATCCCCTTCAAAAATACTCGCCAGCTTTGTGCGATGCATTTTTGCCACCGTTTC  
TTCAATTGGGAGAAACACTGTTGAAAATCCGCAGGTTTGAGTGATCGTAATCCCTCAAT  
CTGAAACTGTCAACCGAGAATATTACAATGGTCTTCTGAGACGATTACGCGAAAATGTCC  
GCAGAAAAAGGCCCGAGCTTTGGAGAGAGAATTCCTGGTTTCTGCATCACGATAATGCAC  
CTGCCCAAGCATCCCTCCAAATTCGCGGATTTGTGCAAAGAATGCCACGAGTGTCTCTC  
TCATCATCTTTATTACCTGACCTTGCTCCGTGTGATTTCTTCTATTTTCACGACTTAA  
ATCTACCTTGAAAGGTCGACGTTTTCAAACCATTCGGAATTCAAGAGAACACCTTGAAA  
GAATTGCGATCATTCAAACCTGAGGATTTCCAACAGTGGTCTCCCAATTGAAGAAACGG  
TGGCAAAAATGCATCGACAAAGCTGGCGAGTATTTTGAAGGGGATAGGTGATGACTTGGT  
ACCTAAGCTGCTTAAAATGTTAATTTCTTATTTTAAAGCATTTGAATAAGAAAGCAACG  
AAGTTTTTAACTTAAACCTGGTTTTTTTTTAAAGTTGTATCTAAAT

--

>Btmar1.13.6\*\_gi-1092444632-gb-MAMS01004733\_1-:1321680-1322856  
gi-1092444632-gb-MAMS01004733.1-:1321680-1322856 Bemisia tabaci isolate MEAM1 Scaffold2737,  
whole genome shotgun sequence 1177 bp

GTACGAGGGCTGTCCCAAAGAAACCGGACTTTTGTATAGAGGGCGAACCGAGCGTCGT  
AATGAAGTTTTCTTGGGCTTGTTTGAAAGCTGATAAGCTATTGGAGATACTGGTTTTTAC  
AGAATGCAAAAATTCGTCTTGGAAGGAACTACACGCTTTGGAATAAAGGGAAGTCAAA  
CTCGAGTTGCGATTTTTGTCTTTATTTCAAGAAAAATATAGATACAACCTAAAAAACCCA  
GGTTTTAAGTTAAAAACTTCGTTGCTCTCATTCAAATGCTTAAAAATAAAGGAAATTAAC  
ATTTTAAGCAGCTTACCAAGTCATCACCTATCCCCTCCAAAATACTCGCCAGCTTTGTGCG  
ATGCATTTTTGCCACCGTTTCTTCAATTGGGAGAAACACTGTAGGAAATCCTCAGGTTTG  
AATGATCGCAATTCCTTCAAGGTGAAACTGTCAATCGCGAATATTACAATGGTGTCTGA  
GACGATTAAACGAAAATGTCCGCAGAAAAAGGCCTGAGCTTTGGAGAGAGAATTCCTGCT  
TTCTGCATCACGATAATGCACCTGCCCATGCATCCCTCCAAATTGGCGAATTTTGTGCAA  
AGAATGCCATGAGTGTCTCCCTCATCCCCCTTATTCACCAAACCTGGCTCCGTGTGATT  
TTTTTATTATTTCCACGACTTAAATCTACCTTGAAAGGTCGACGTTTTCAAACCATTCGG

GAAATTCAAGAGAACACCTTGAAGGAATTGCCATCATTCAAACCTGAGGATTTCTACAG  
TGTTTCTCTCAATTGAAGAAACGGTGGCAAAAATGCATCGACAAAGCTGGCGAGTATTTT  
GAAGGGGATAGGTGATGACTTGGTAAGCTGCTTGAAATGTTAATTCCTTATTTTTAAGC  
ATTTGAATAAGAGCAACGAAGTTTTTAACCTAAAACCTGGGTTTTTTAAGTTGTATCTA  
AATTTTTCTTGAAATAAAGACAAAAATCGCAACTCGAGTTTGACTTCCCTTTATTCCAAA  
GCGTGTAGTTTCCTTACCAAGACGAATTTTTGCATTCTGTAAAAACCAGTATCTCCAATA  
GCTTATCAGCTTTCAAACAAGCCCAAGAAAACCTTCATTACGACGCTCGGTTCCGCCCTCTA  
TGACAAAAGTCCGGTTTCTTTGGGACAGCCCTCGTA

--

>Btmar1.13.7\_gi-1092454879-gb-MAMS01000194\_1:-972167-972959  
gi-1092454879-gb-MAMS01000194.1:-972167-972959 Bemisia tabaci isolate MEAM1 Scaffold610, whole  
genome shotgun sequence 793 bp

TACGAGGGCTGTCCCAAAGAAACCGGACTTTTGTCTAGAGGGCGAACCGAGCGTCGTA  
ATGAAGTTTTCTTGGGTTTGTGAAAGCTGATAAGCTACTGGAGATGCTGGTTTTTACA  
GAATGCAAAAATTCGTCTTGTAAGGAACTACACGCTTTGGAATAAAGGAAAGTCAAAC  
TCGAGTTGCGATTTTTGTCTTTATTTCAAGAGAAATTTAGATACAACCTAAAAAAAAC  
CAGGTTTTAAGTTAAAACTTCGTTGATCTCATTCAAATGCTTAAAAATAAGGAAATTAA  
CATTTAAGCAGCTTACCAAGTCATCACCTATCCCCTTCAAATACTCGCCAGCTTTGTC  
GATGCATTTTTGCCACCGTTTCTCATTTGGGGGAAACACTGTAGGAAATCCTCAGGTTT  
GAATGATCGCAATTCCTTCAAGGTGAAACTGTCAATCGCGAATATTACAATGGTGTTCTG  
AGACGATTAAGCGAAAATGTCCGCAGAAAAAGGCCTGAGCTTTGGAGAGAGAATTCCTGC  
TTTCTGCATCACGATAATGCACCTGCCATGCACCCCTCCAAATTGGCGAATTTGTGAA  
AAGAATGCCATGAGTGTCTCCCTCATCCCCCTTATTCACCTAACCTGGCTCCGTGTGAT  
TTTTCTTATTTCCACGACTTAATTCTACCTGAAAGGTCGACGTTTTCAAACCATTCGG  
GAAATTCAAGAGAACACCTTGAAGGAATTGCGATCATTCAAACCTGAGGATTTCTTAAAG  
TGTTTCTCCCAAT

>Btmar1.14.1\_gi-1092455625-gb-MAMS01000011\_1:-942346-943002  
gi-1092455625-gb-MAMS01000011.1:-942346-943002 Bemisia tabaci isolate MEAM1 Scaffold123, whole  
genome shotgun sequence 657 bp

TACGAGGGCTGTCCCAAAGAAACCGGATTTTTGTCTAGAAAGGTGAACCGAGCGTTGTA

ATGCAGTTTTCTTGGGGTTGTTTGAAAGCTGATAAGCTACTGAAGATGCTTGTTATTACA  
GAATGCATAAATTCGTCTTTGTAAGGAACTACACGCTTTGGAATAAAGGAAAGTCAAAC  
TCGAGTTGCGATTTTTGTCTTATTTCAAGAAAAATATAGATACAACCTAAAAAACCCCT  
GGTTTTAAGTTGAAACTTCGTTGCTCTCTTCTTCAAATGCTTAAAAAAAGGAAATTAA  
CATTTAAGCAGCTTACCAAGTCATCACCTATCCCCTTCAAATACTCGCCAGCTTTGTC  
GATGCATTTTTGCCACCGTTTCTTCAATTGGGAGAAACACTGTTGGAAATCCTCAGGTTT  
GAATGATTGCGATTCTTCAAGGTGTTCTTGAATTTTCGGAATGGTTTGAAAACGTCG  
ACCTTTCTAGGTAGATTTAAGTCGTGGGAATAAGAAAAAATCACACGGAGCCAGGTCAGG  
GGAATAAGGGGGATGAGGAAGGACACTCATGGCATTCTTGCACAAAATTCGCGAATTTG  
GAGGGATGCATGGGCATTATCGTGATGCAGAAACCAGGAATTCTATTCCAAAGCTC

>Btmar1.14.2\_gi-1092455625-gb-MAMS01000011\_1-:7723731-7724284  
gi-1092455625-gb-MAMS01000011.1-:7723731-7724284 Bemisia tabaci isolate MEAM1 Scaffold123,  
whole genome shotgun sequence 554 bp

GTACGAGGGCTGTCCCAAAGAAACCGGACTTTTGTCTAGAGGGCGAACCGAGGGTCGT  
AATGAAGTTTTCTTGAGCTTGTTTGAAAGCTGATAAGCTACTGGAGATACTGGTTTTTAC  
AGAATGCAAAAATTCGTCTTGGTAAGGAACTACACGCTTTGGAATTCAGGAAAGTCAAA  
CTCGAGTTGCGATTTTTGTCTTTATTTCAAGAAAAATTTAGATACAACCTAAAAAACCC  
AGGTTTTAAGTTAAAACTTCGTTGCTCTCATTCAAATGCTTAAAAATAAGGAAATTAAC  
ATTTAAGCAGCTTACCAAGTCATCACCTATCCCCTTCAAATACTAGCTTTGTCGATGC  
ATTTTGGCACTGTTTCTTCAATTGGGAGAAACACTGTTGGAAATCCTCAGGTTTGAATG  
ATCGCAATTCCTTCAAGGTGAACTGTCAATCGCGAATATTACAATGGTGTCCGAGACG  
ATTAAGCGAAAATGTCCGCAGAAAAAGGCCTGAGCTTTGGAGAGAGAATTCCTGCTTCCT  
GCATCACGATAATG

--

>Btmar1.14.3\*\_gi-1092428348-gb-MAMS01017190\_1-:553-1252  
gi-1092428348-gb-MAMS01017190.1-:553-1252 Bemisia tabaci isolate MEAM1 Scaffold81686, whole  
genome shotgun sequence 700 bp

TACGAGGGCTGTCCCAAAGAAACCGGACTTTTGTCTAGAGGGCGAACAGAGCGTCGTA  
ATGAAGTTTTCTTGGGCTTGTTTGAAAGCTGATAAGCTACTGAAGATGCTTGTTTTTACA

GAATGCAAACATTGGTCTTGGTAAGGAACTACACGCTTTGGAATAAAGGAAAGTCAAAC  
TCGAGTTTGGATTTTTGTCTTTATTTCAAGAAAAATTTAGATACAACTTAAAAAAAAAA  
ACCAGGTTTTAAGTTAAAACTTCGTTGCTCTCTATTCAAATGCTTAAAAATAAGGAAA  
TCAACATTTTAAGCAGCTTACCAAGTCATCACCTATCCCCTTCAAAATATTCGCCAGCTT  
TGTCGATGCATTTTTGCCACCGTTTCTTCAATCGGGAGAAACACTGTTGAAAATCCGCAG  
GTTTGAATGATCGCAATTCCTTGAAGGTGAAACCGTCAACCGAGAATATTACAATGGTGT  
TCTGAGACGATTACGCGAATATGTCCGCAGAAAAAGGCCCGAGCTTTGGAGAGAGAATTC  
CTGGTTTCTGTATCACGATAACGCACCTGCCCAAGCATCCCTCCAAATTCGCGAATTTTG  
TGCAAAGAATGCCATGAGTGTCTCCCTCATCCCCTCTATTTACCTGACCTGGCTCCGTG  
TGATTTTTTCTTCACGACTTAAATCTACCTTGAAAGGTCG

>Btmar1.14.4\_gi-1092427692-gb-MAMS01017846\_1-:145-790

gi-1092427692-gb-MAMS01017846.1-:145-790 Bemisia tabaci isolate MEAM1 Scaffold84775, whole genome shotgun sequence 646 bp

TACGAGGGCTGTCCCAAAGAAACCGGACTTTTGTATAGAAGGCGAACAGAGCGTCGTA  
ATGAAGTTTTCTTGGGCTTGTTGAAAGCTGATAAGCTACTAAAGATGCTTGTTTTTACA  
GAATGCAAACATTGGTCTTGGTAAGGAACTACACGCTTTGGAATAAAGGAAAGTCAAAC  
TCGAGTTTGGATTTTTTTCTTTATTTCAAGAAAAATTTAGATACAACTTAAAAAAAAAAC  
CAGGTTTTAAGTTAAAACTTCGTTGCTCTCTATTCAAATGCTTAAAAATAAGGAAATC  
AACATTTTAAGCAGCTTACCAAGTCATCACCTATCCCCTTCAAAATATTCGCCAGCTTTG  
TCGATGCATTTTTGCCACCGTTTCTTCAATCGGGAGAAACACTGTTGAAAATCCGCAGGT  
TTGAATGATCGCAATTCCTTCAAGGTGAAACCGTCAACCGAGAATATCACAATGGTGTTT  
TGAGACGACTACGCGAAAATGTCCGCAGAAAAAGGCCCGAGCTTTGGAGAGAGAATTCCT  
GGTTTCTGCATCACGATAATGCACCTGCCCAAGCATCCCTCCAAATTTGCGAATTTGTG  
CAAAGAATGCCATGATTGTCTCCCTCATCCCCTCTATTACCTGA

>Btmar1.15.1\*\_gi-1092454581-gb-MAMS01000286\_1-:294639-295854

gi-1092454581-gb-MAMS01000286.1-:294639-295854 Bemisia tabaci isolate MEAM1 Scaffold1011, whole genome shotgun sequence 1216 bp

TACGAGGGCTGTCCCAAAGAAACCGGACTTTTGTATAGAAGGCGAACCGAGCGTCGTA  
ATGAAGTTTTCTTGGGCTTGGTTAAAAGCTGATAAGCTACTGGAGATGCTTATTTTTACA

AAATGCAAAAATTCGTCTTGGAAGGAACTACACGCCTTGAATAAAGGGAAGTCAAAC  
TCGAGTTGCGATTTTTGTCTTTATTTCAAGAAAAATTTAGATACAACTTTAAAAAAACCC  
TGGCTTTGAGTTAAAACTTCATTTCTCTTATTCAAATGCTTTAAAATAAGGAAATTA  
ACATTTGATTTTAAGCAGCTTACCAAGTCATTACCTGTCCCTTTCAAATACTCACCAGC  
TTTGTGATGCATTTTTGCCACCGTTTCTTCAATTGGGAGAAATACTGTTGGAAATCCTC  
CGATTTGAATGATGGGAATTCCTTCGAGGTGTTCTTGAATTTACCGAAAGGAGAACT  
TTCAATCGCGAATATTACAATGGTGTCTGAGACGATTACGCAAAAATGTCCGCAGAAAA  
AGGCCCCGAGCTTTGGGGAGAGAGTTCCTGGTTTCTGCATCACGATAATGCACCTGCCCAT  
GCATCCCTCCAAATTCGCGACTTTTTTGCAAAGAATGCCATGGGTGTCCTCCCTCATCCC  
CCTTATTCACCTGACCTGGCTCCGTGTGATTTTGTCTTATTTCCACGACTTAAATCTACC  
TTAAAAGGTCGACGTTTTCAAACCATTCCGGAAATTCATAGAACACCTTGAAGGAATTG  
CGATCATTTCAACCTGAGGATTTCCAACAGTATTTCTCCAATGGAAGAAACGGTGGCAA  
AAATGCATCGACAAAGCTGGTGAGTATTTGAAAGGGACAGGTAATGACTTGTAAGCTG  
CTTAAAATCAATTGTTAATTTCTTATTTTTAAGCATTGAATAAAAGAGCAATGAAGTT  
TTTAACTTAAAGCCAGGGGTTTTTAAAGTTGTATCTAAATTTTTCTTGAAATCAAGACA  
AAAATCGCAACTCGAGTTTGACTTTCCTTTATTCCAAAGCGTGTAGTTTCCTTACCAAGA  
TGAATTTTTGCATGCTGTAAAAACAAGCATCTCTAGTAGCTTATCAGCTTTCAAACAAGC  
CCAAGAAAACCTTCATTACAACGCTCGGTTCACTTTCTATGACAAAAGTCCTGTTTCTTTT  
GGGACAGCCCTCGTAC

>Btmar1.15.2\_gi-1092442913-gb-MAMS01005707\_1-:115951-117147

gi-1092442913-gb-MAMS01005707.1-:115951-117147 Bemisia tabaci isolate MEAM1 Scaffold3142,  
whole genome shotgun sequence 1197 bp

TACGAGGGCTGTCCCAAAGAAACCGGACTTTTGTATAGAAGGCGAACCGAGCGTCGTA  
ATGAAGTTTTCTGGGGCTTGTTTGAAAGCTAATAAGCTACTGAAGATGCTTTTTTTTACG  
GAATGCAAAAATTCGTCTTGGAAGGAACTACACGCTTTGGAATAAAGGAAAGTCAAAC  
TCGAGTTGCGATTTTTGTCTTTATTTCAAGAAAAATTTAGATACAACTTTACAAAAAACC  
CAGGTTTTAAGTTAAAACTTCGTTACTCTCTTCTTCAAATGCTTAAAAATAAGGAAATT  
AACATTTTAAGCAGCTTACCAAGTCATCACCTATCCCCTTCAAATACTCGCCAGCTTTA  
TCGATGCATTTTTGCCACCGTTTCTTCAATTGGGAGAAACACTGTTGGAAATTCTCAGGT  
TCGAGGAGTTGTCCATCATGAATTTTTACCGAAAGGAGAACTGTCAATGGCGAATATTA

CAATGGTGTCTGAGACGATTACGCGAAAATGTCCGTAGAAAAAGGCTCGAGCTTTGGAG  
AGAGAATTCTGGTTTCTGCATCACGATAATGCACCTGCCCATGCATCCCTCCAAATTCG  
CGAATTGTGTGCAAAGAATGCCATGAGTGTCTCCCTCATCCCCCTTATTCACCTGCCCT  
GGTCCCCGTGATTTTTCTATTTCGCGACTTAAATCTACCTTGAAAGGTCGACGTTT  
TCAAACCATCCGGAAATTCAAGAGAACGCCTTGAAGGAATTGCGATCATTCAAACCTGA  
GGATTTCCAACAGTGTCTCCGCATTGAAGAAACGGTGGCAAAAATGCATCGACAAAGC  
TGGCGAATATTTGAAGGGGATAGGTGATGACTTGGTAAGCTGCTTAAAATGTTAATTTT  
CTTATTTTAAAGCATTTGAAGAAGAGAGCAACGAAGTTTTTAACTTAAACCTGGGTTT  
TTTTGTAAAGTTGTATCTAAATTTTTCTTGAAATAAAGACAAAAATCGCAACTCGAGTTT  
GACTTTCCTTTATTCCAAAGCGTGTAGTTCCTTACCAAGACGAATTTTTGCATGCCGTA  
AAAACAAGCATCTTTAGTAGCTTATCAGCTTCAAACAAGCCCCAGAAAACCTCATTACG  
ACGCTCGGTCGCCTTCTATGACGAAAGTCCGGTTTCTTTGGGACAGCCCTCGTAC  
--

>Btmar1.15.3\_gi-1092427212-gb-MAMS01018326\_1:-48530-49723

gi-1092427212-gb-MAMS01018326.1:-48530-49723 Bemisia tabaci isolate MEAM1 Scaffold8703, whole  
genome shotgun sequence 1194 bp

TACGAGGGTTGTCCCAAAGAAACCGGACTTTCGTCATAGAAGGCGAACCGAGCGTTGTA  
ATGAAGTTTTCTGGGCTTGTTGAAAGCTGATAAGCTATTAAAGATGCTTGTTTTACA  
GAATGCAAAAATTCGTCTTGTAAGGAACTACACGCTTGGAATAAAGGAAAGTCAAAC  
TCGAGTTGCGATTTTTGTCTTTATGTCAAAAAAATTTAGATACAACCTAAAAAGAAACC  
CAGGTTTTAAGTTGAAAACCTCGTTGCTCTCTTCTTCAAATGCTTAAATATAAGGAAATT  
AAAATTTTAAGCAGCTTACCATGTCATCACCTATCCCCTTCAAATACTCGCCAGCTTTG  
TCGATGAATTTTTGCCACCGTTTCTCAATTGGGAGAAACACTGTTGGAAATCCTCAGGT  
TTGAATGATCCCAATTCCTTCAAGGTGTTCTCTTGAATTTACCGAAAGGACAAACTGTCA  
ATCGCGAATATTCCAATGGTGTCTGAGACGATTACGCAAAAATGTCCGCAGAAAAATAG  
GCCTGAGCTTTGGGGAGAGAATTCTGGTTTCTGTATCACGATAATGCACCTGCCCATGC  
ATCCCTCCAAATTCGCGAATTTGTGCAAAGAATGCCATGAGTGTCTCCCTTATCCCCC  
TGACCTAGCTCCGTGTGATTTCCCTATTTCCACGACTTAAATCTACCTTGAAAGGTCGA  
CGTTTTCAAACCATCCGGAAATTCAAGAGAGCACCTTGAAGGAATTGCGATCATTCAA  
CCTGAGGATTTCCAACAGTGTCTCCCGATTGAAGAAACGGTGGCAAAAATGCATCGAC

AAAGCTGGCGAGTATTTTGAAGGGGATAGGTGATGACTTGGTAAGCTGCTTAAATGTTA  
ATTCCTTTTTTTTAAAGCATTTGAAGAAGAGAGCAACGAAGTTTTCAACTTAAACCAGG  
GGTTTTTAAAGTTGTATCTATATATTTCTTGAAATAAAGACAAAAATCGCAACTCGAGTT  
TGACTTTCCTTTATTCAAAGCGTGTAGTTTCCTTACCAAGACGAATGTATGCATTCTGT  
AAAAACAAGTATCTTTAGTAGCTTATCAGCTTTCAAACAAGCCCAAGAAAAGTGCATTAC  
GCTCGGTTGCGCTTCTATGACAAAAGTCCGGTTTCTTTTGGGACAGCCCTCGTA

>Btmar1.16.1\*\_gi-1092454946-gb-MAMS01000174\_1-:499068-500772

gi-1092454946-gb-MAMS01000174.1-:499068-500772 Bemisia tabaci isolate MEAM1 Scaffold562, whole genome shotgun sequence 1705 bp

TATCCAGCAGACCTTCGCCAAAGGTCCATCTCAGTTGCCCTTGCCCTTAGCATGTCTTCAGTTCTTTCTTTAGTTGC  
CAGACCTCACTCCCCTAAGTTACGATACTCTTCACGATGACGTTGTAAATTTTCTTTGGTCTCCTTGAGATACTC  
TTGTCACAGAGAACCCCATTTAGCATCGCGATAGCTTTCATGCCTTGCATATTCCGATCTTTAATAGCTCGATCCAAA  
TTCCGTCCTCAGTTAACCAAACTCCTAGATACGTGGTCTGTCCGAAAGTATCAGAACTTTTAGATTTTGAGAAA  
GCGAGCGTAAGTACTCTCCGTAAGACACAATGCACTTGTCTAGCGATTTTGGAGCTTTTCAAACAGTCCAAAAA  
GCACTCCTTTGCGATGTCCCTCAGCGCTCTCGTCGTATTCTCTTTAATGTCATTGATGGAGTCAAATCGAGTCCCTTT  
CATAAGAGATTTAGCTATGGGAACAGCCAGAAGTCGCAAGGAGCTAAGTCTGGACTGCATGGAGGATGTGGAA  
CCAGAGGAATACCGTGCTTTACCAAAAAGTGTGCACAAGACAGAAGGAACGAGCCGGAGCGTTGTCATGTTGGA  
GCATCCAGTCACCGCTTGCCATAATGCAGGGCGCTTGCCTGATAGCATCCCGCAAACGCCGTAAAGTTTCCTG  
ATATGCTTCTTTAGTGATGGTTGTACCCTGGGGAGCATATTCGTGATTCTTAATACCTTGGTAGTCGAAAAAACAG  
TGAGCATGACCTTGATGTTGCTGTGACTTCGCCGTGCTTCTTTGGGGCGCGCGTCCCGGGTGCGATCCATTCTGA  
GGACTGTGCTTTTGTCTCAGAGTCATAGCCGTAGACCCAAGACTCATCCCGGTTATGATTTTCTTCAAAAAGTCTAG  
GGTCATTCTCAGTGTTGCTGTAACTCGTCGAAATGAAAAGTCGCCACTCCTTTGCTCTGCTGTCAAAAATCTTT  
GGCACAATTTTCGCTGCCACTCTACGGAGCCCGAGTTTTCAGTTAAAAGGACCCTACAACAAAACGGCCAAATCG  
GCCTAAACACGGAATCGTACGATTTTCTCAGGAATGATAGAGGGTCTTCCAGACACTCAAAAGTGGTCATATTTT  
TGCGTAACCCCAAGGAAAAGGGAGGAGGGGGTCAAAGTCAAACCTTTAAATTAGCATAACTTCTCAACGGT  
TTGTCGTAGAAAGATGATCTTGGTGTCAAAAATTTCCAGAAAAATGAGAGCTTTCAGAATATATGTATGAAATTACTA  
AAATTATGAAATTTGACCCACTTTTGGGGCATTTTACAAGGTCCCCCTTTCGTAAATTTTCGTTTTTTGAGATTTTCG  
GTTGTTGCGTTTCGTACGGATTAAGACAAAAACAATTTCAAATGAAAGGAGAGCGTTTAAAGCTTTAAAACAAGACCA  
AGATGATCCTTAGAAAACGATTAGAAGCGGAGTTATGAGTCTTCAAAGTTGACGCGGCGCGCGGGAACCTTGAT  
GTTCCGAGTCTCAAGGTACCTGCGCGCCCCGGATTGCCTGCAGGTTGCAAGTTTTTGTGTTTTATGCTTCTGTAA  
GTAGGTCATTTTTAATGTAAATCATTCAATGAAGATAGTTTAATCAGAATTTTTTAAATTTACGCAATGGGCCTTGG  
GCGAGGTACACCTCTTTA

>Btmar1.16.2\*\_gi-1092454946-gb-MAMS01000174\_1-:499219-500804

gi-1092454946-gb-MAMS01000174.1-:499219-500804 Bemisia tabaci isolate MEAM1 Scaffold562, whole genome shotgun sequence 1586 bp

ATACTCTTGTCACAGAGAACCCCATTTAGCATCGCGATAGCTTTCATGCCTTGCATATTCCGATCTTTAATAGCTCGA  
TCCAAATTTCCGTCCTCAGTTAACCAAACTCCTAGATACGTGGTCTGTCCGAAAGTATCAGAACTTTTAGATTTTG  
AGAAAGCGAGCGTAAGTACTCTCCGTAAGACACAATGCACTTGTCTAGCGATTTTGGAGCTTTTCAAACAGTCC  
AAAAAGCACTCCTTTGCGATGTCCCTCAGCGCTCTCGTCGTATTCTCTTTAATGTCATTGATGGAGTCAAATCGAGTC

CCTTTCATAAGAGATTTTCTAGCTATGGGAACAGCCAGAAAGTCGCAAGGAGCTAAGTCTGGACTGCATGGAGGATGT  
GGAACCAGAGGAATACCGTGCTTTACCAAAAAGTGTGCACAAGACAGAAGGAACGAGCCGGAGCGTTGTCATGT  
TGGAGCATCCAGTCACCGCTTGCCCATATGCAGGGCGCTTGCGTCTGATAGCATCCCGCAAACGCCGTAAAGTTT  
CCTGATATGCTTCTTTAGTGATGGTTGTACCCTGGGGAGCATATTCGTGATTCTTAATACCTTGGTAGTCGAAAAA  
ACAGTGAGCATGACCTTGATGTTGCTGTGACTTCGCCGTGCTTCTTTGGGGCGCGGCGTCCCGGGTGCGATCCATT  
CTGAGGACTGTGCTTTTGTCTCAGAGTCATAGCCGTAGACCCAAGACTCATCCCCGGTTATGATTTTCTTCAAAAAC  
TCAGGGTCATTCTCAGTGTTGCTGTAACTCGTCGAAATGAAAAGTCGCCACTCCTTTTGCTCTGCTGTCAAAAT  
CTTTGGCACAATTTTCGCTGCCACTCTACGGAGCCCGAGTTTTTCAGTTAAAAGGACCCTACAACAAAACGGCCAAA  
TCGGCCTAAACACGGAATCGTACGATTTTCTCAGGAATGATAGAGGGTCTTCCAGACACTCAAACTGGTCATATT  
TTTTGCGTAACCCCCAGGGAAAAGGGAGGAGAGGGGGTCAAAGTCAAAACCTTTAAATTAGCATAACTTCTCAAC  
GGTTTGTCTAGAAAGATGATCTTGGTGTCAAAATTTCCAGAAAAATGAGAGCTTTCAGAATATATGTATGAAATT  
ACTAAAATTATGAAATTTGACCCACTTTTGGGGCATTTTACAAGGTCCCCCTTCGTAAATTTTCTGTTTTTTGAGATTT  
TCGGTTGTTTCGGTTTCGTACGGATTAAGACAAAAACAATTTCAAATGAAAGGAGAGCGTTTAAGCTTTAAAAACAAGA  
CCAAGATGATCCTTAGAAAAACGATTAGAAGCGGAGTTATGAGTCTTCAAAGTTGACGCGGCGCGCGGGAACCTTG  
TATGTTCCGAGTCTCAAGGTACCTGCGCGCCCCGATTGCCTGCAGGTTGCAAGTTTTTGTGTTTTTATGCTTCTGT  
AAGTAGGTCATTTTTAATGTAAATCATTCAATGAAGATAGTTAATCAGAATTTTTTTAATTTTACGCAATGGGCCTT  
GGGCGAGGTACACCTCTTTAACGTCAAAAAAGTTTGACTGCGTTTCAAGTAG

>Btmar2.1|gi|1092428043|gb|MAMS01017495\_1|:3236801-3238607 | NW\_017564582.1|en amant  
LOC109042459|GeneID:109042459||XM\_019059206.1|Bemisia tabaci isolate MEAM1 Scaffold831,  
whole genome shotgun sequence 1807 bp

TACGAGGGGCGTTCAATAAGTAAGTATCCCCCCTCTAAAATCTATAAAAATGGACCAA  
TTTTTAAAACTTGGGCTTAAATCTTCCTTAGGATATTCTGAGCTCAACAAAACAAACC  
GCACTAAAATCGGACCATTTCGCGCCGAACGCGAGCCGTTTGAACGCGCCGAAGCGCGCG  
CCGCTCCCGCCAAATCCGCGGGTATTTTAAGTCAGCGAAAAGAGAGCAGCTTCTTCGCCA  
AGGCTTCCATCGTTTCATCCCTGCCGAAAATACAAATAAGATATATGTAGAATAAGGGGCT  
TACCTTACTTCTCCACATAGTCACCAGCCCGATCCAAGCACTCCGGTACCGAGTGGACA  
GCTTGTGGATGCCACACGCGTAAAATTCCTTCGGCTGACTAATGAAGAAGGTGTGGACGG  
CTTGTTAAGCTCTTCTACGGATTCAAAATGAATTCCCCCAAGTTCTGCCTTTAGGTACG  
GAAATAGATGGTAGTCTGACGGTGCCAAATCAGGAGAGTAAGGAGGATGTGGGAATACTT  
CCCATTTGAATGATGCTAAACGATCCTTTGAAATGGCTGCAGCATGTGGGCGCGCATTGT  
CGTGGAGAAAAAGAACACCCCGTCTCAATTTCCGCGGCGCTTATTCTGGATAGCTCGTC  
TTAACCGATCCAGAATGCCGCAATAATTCAGCATTGATTGTTCTGCCTTTTCAAGAT  
AATCCTCCAGGAGGACACCTTCTGCATCCCCAAAAAAGTGTGAGCATCACTTCCCGGCAG  
AATTTTGCCTTTTGAATTCGTGCGGGATTTTTCTCCCGGCCCGATCCAAGACATGGATT  
GTTTCTTGGTTTCAGGAGTATAGTGATGCACCCATGTTTCATCACCCGTGACTATACTTT



GGTAAACCTCCTCTTGACCAAATTCTTTAATTTGCAGGAAAAATTCGTCTCCTGCTGCTA  
CACGCTGAGCTTTGTGAGCTGCAGTCAGTTCGCGCGGCACCCAACGAGCACAACTTTAC  
GCATGAACATTTTTTCGTGAATAATGGTTTCAATGGAACCAACCGAAAGGTCAATACAAT  
ATTGTTGCGGTAACAGACGTTTCATTTCTTTGACTTTTACCCGACGATTGTCCTCAATCA  
CGGCTTCAACTGATTGCGACTGCATCGTCGGTGATGGCTTCACATGGACGACCCGAGCGTT  
GCAGATCGTGGATATCCGCGCGACCTTTTTTGAATTGATCAACCCATCTGCGCACCATAC  
ACACAGTCATACATGTTGCACCGTATACGGCGACCAGTTTTTCGATGGATAGCATTGCCGG  
TTTTCCCTTCCGCACTTAAAAACCGAATAACTGCGCGAATTTACAATCCTGAACAATTT  
GAAGCGGTAACTCCATGATGCACACGTGAAAAAACGCTGCCACTAGACTGATTGTTTTTC  
GGAATCATGATGCCACGGCATTATTATCAACGCGTTTTTCATGTTATCTTGTTATCTGT  
ATGCACCGTGATTTTATGATTAATACAGATTGTGTGATCCACTCGCAGAGAGGATCCAAA  
TCACTACCTCAGAAAGGTGATAACTGAACACCAAGCTGCGATTGCTAGCAGATTGGGCGG  
GAGCGGCGAGCGCTTCGGCGCGTTCAAACGGCTCGCGTTCGGCCGCAAATGGTCCGATT  
TAGTGCGGTTTGTTTTGTTGAGCTCAGAATATCCTAAGGAAGATTTTAAGCCCAAGTTTT  
TAAAAATTGGTCCATTTTTATAGATTTTAGAGGGGGGGGATACTTACTCATTGAACGCC  
CCTCGTA

>Btmar2.2|gi|1092425825|gb|MAMS01019713\_1|:1862878-1863402  
gi|1092425825|gb|MAMS01019713.1|:1862878-1863402 Bemisia tabaci isolate MEAM1 Scaffold988,  
whole genome shotgun sequence 525 bp

TACGAGCCTCTTGCAACGCTGCGTCGGTGGAGAACTTTTGGCCACCCAAGCTCTTCTTTA  
ACGCAAGAAAGAGATGAAAATCGCTTAGAGGAAGGACCGGTGAGTACCGTGGATGAGGAA  
AAAGGTCCCAATTGAATGAGCCGAACAAGTCTTGAGTCACATGAGCCACATGAGGCCTAG  
CGTTGTCTTGAAGGAAGAACAATTGACGAGACAAAAGACCGGGCCGTTTTTCGCTTGATCG  
CTGACTTAATTTTTTGCAAACTTCACAATATCTTTCGGCATCGATCGTTTTTCCTCTCT  
CCAAGAAATCGATCAGTAATATTCCTTGAGCGCCCCAAAACACCTTAGCATGTACTCGTC  
TGAGGAGCTCCGCCGCACTCGAATATTTTGGACACGCAGTGACGAGAGGTGGGTGCGAGA  
AAAATGACGTCACTCGCGAACCGGTAAACCAAATTTAAAAAACGAAGACTTTTTGAAAAG  
CTGAGAGTATGGCGGTAAAAACGACGTTTACCGATTTAATTTATC

>Btmar2.3|gi|1092435004|gb|MAMS01010534\_1|:8762007-8763707  
gi|1092435004|gb|MAMS01010534.1|:8762007-8763707 Bemisia tabaci isolate MEAM1 Scaffold52,  
whole genome shotgun sequence 1701 bp

GTAAGTTTTGTGATGCTAAATGGTAAAATATATGTTATAAGAATATCTGACCCCGCTCA  
GGCTTTCTAGGGGCACTCGTGAATTTTTGATCTCTCATGCACTTTTTTTTTTTTCCCCC  
TTCAAAATCGTGTTCTAGATGTTTTGTAGAGCTATTTGTGAAGGACAAAAATTTCTGT  
GCATACCACGAGAAATGGCAAAGAGTTGAAACTCCGGTGGGGTCAATCTGACCCCACTCA  
GGCAGACTAGGGTTAATCTCCTTCGAAGTACTCTCCGTAAGACACAATGCACTTGTTCCA  
GCGATTTTTGAGCTTTTCAAACAGTCCAAAAGCACTCCTTTGGGATATCCTTCAGCGC  
TCTCGTCGTATTCTTTGATGTCATTGATGGAGTCAAATCGAGTCCCTTTCATTGGAGA  
TTTCAGCTTTGGGAACAGCCAGAAGTCGCAAGGAGCTAAGTCTGGACTGTATGGAGGATG  
TGGAACCAGAGGAATACCGTGCTTTGCCAAAACCTGTTGCACAAGACAGGAGGAATGGGC  
CGGAGCGTTGTCATGCTGGAGCATCCAGTCAACGCTTGCCATAATGCAGGGCGCTTGCG  
TCTGATAGCATCCCGCAAACGCCGTAAAGTTTCTGGTATGCTTCTTTAGTGATGGTTGT  
ACCCTGGGGAGCATATTCGTGATGCACAATACCTTGGTAGTCGAAAAAACAGTGAGCAT  
GACCTTGATGTTGCTGCGACTTCGCCGTGCTTTTTTGGGGCGCGGCGTCCCGGGTGCCAT  
CCATTCTGAGGACTGTGCTTTCGTCTCAGGGTCATAGCCGTAGACCCAAAACATCCCC  
GGTTATGATTTTCTTCACAACTCAGGATCATTCTCAGTAGCTGCCTGTAACCTCGTCGGA  
AATGAAAAGTCGCCGCTCCTTTTGCTCAGCTGCGCTGTCAAACCTTTGGCACTTTGCT  
GCCACTCTACGGAGCCCGAGTTTTTCAGTTAAATTTCCGCAACGATGGTCTTCGGGATG  
TTTAGCTGCTCTTCCAGTTCCCGCACGGTTAATCGACTGTCTTGGGCGATAGCTTCCCGA  
ACTTCTCCACGTTATCGGGAGAATTCGTGACGAAGGTCTCCCGACCGCGGATCACTA  
GCGACTGTTTCACGACCCGATTTAAAACGATTATACCACTCATAAATATTGCTCTTGCTC  
ATAGAATCAGTGCCGAAAGCTTTCGAATCATTTTCATGATCTCCTTGGCAGTTTTTCT  
AGATTAAAGCAAAATTTAATACAAATTCTCTGATCTTCACGCTCGGTCATTTTACGAAAA  
AAAAACGCGACGATAGCACTTGACACACACACTTTGATCAGTTGATTGCAATCGACTGA  
TTAAAGGTGTGAAAGCCCGATTGTGTGGCTGCATTGGAGAGGACATGGGCAAAGTCCAAC  
CCAAGTTTCAACTCATTATCTGCATTACATTCCGAGATAATCAAAAAGTCCTGATACTTT  
CCGGACAGACCAGTAGTACCCTATTGACGCCAGCGTGGGTGCCAACAGTTTACCCACTG  
CAATACCATGTTGAGATTAGTAGGTAGGTGCGGGGATGTTACCACGATGAAACATACACA

GTAACACACCTACTTGTTCACATTGTTCCGCGTTGGGAATACCTTATTTGACAGCATA  
TTACATCGACAGTGAAGCTAC

>Btmar2.4|gi|1092425825|gb|MAMS01019713\_1|:4047405-4048975  
gi|1092425825|gb|MAMS01019713.1|:4047405-4048975 Bemisia tabaci isolate MEAM1 Scaffold988,  
whole genome shotgun sequence 1571 bp

TATCATGATTGTGGAATCATCTGCAGTTGGCCAACTATGCAGCTTCTGTGAACACATAAG  
ATACTTCCCTTAGAAAAAATACATTGTACGAGGGGTTTTCCAAAAGTAAGGTCTCCATA  
ATTTTTTCAAGTAGATAAAAGCATATATTTTCTAAAAGTATTCATGGTTCGAAAGGTAA  
TATCCTAAGCTATTTTTGAACATAATCACCGTCTCAATCGATGCATTTTTGTAGTTTTGG  
GAGCAGTTTCCGTATGCCCTCATCGTAATGCTGTACCGCCACCTCTCAGAAGTACCGTGC  
CATCTCTTCCTTCATGTCGTCAGTGTGCGCGAAGTGCTGTCCACCCAAGTGTTCCTCAA  
TGCTGGGAATAGATGGTAATCACTGGGGGCTAAATCCGGGCTATAGGGGGGATGATCAAG  
GACAATCCATCCAAATTGAGCCGGGAGATCATTAGTAAGACAGGCTGCATGTGGACGGGC  
ATTGTCGTGAAGAAAGTTCACACCCTTTGTGAGCAATCCTCTTTGTTTGTTCGAATAGC  
TCGTCTCAATTTTTTAAAGTCTCACAATAAGTCAATGCATTAATTGTGGTTCCAGGCTC  
CATGTATTCAAGCTACAATACTCTTTTGTAGTCCCAAAAACGGTTGCCATGATCTTACC  
GGTAGACGGGGTTTGCTTGAATTTCTTAGGCTTTGGCGAAGTTGTATGCATCCACTGACG  
AGACTGTTCTTTGGTCTCGGGTGTGTACAGATAGATCCATGTTTTGTCACCTGTAACAAT  
AGAATTCAAGAGATCATCCTTTTTGTTGGCATAGCGCTCAATGAATTCTTGTGAAGCCTG  
CACTTGTTGCTGTTTGTGTTTATACGTCAGCATTCGCGGAACCCTCCGGGCGCACACTTT  
GTGATACTGGAGTTTTTCAGTCAAAATTCGGTAAATGGTGGTTTGAGAAACATCAGGAAC  
CAAGGAAGTAAGCTCCTTGAGCGTCACTCTTCTATCTTCAAGCAATGCTGCTTCAATCTT  
TGCAATTGTCTCATCAGAAGTCGACGGCCGGCTGCTTCTCTTTCATCGTGAATGTCGGT  
ATGACCTGCTGTGAATTCACGGCACCATTTACGGACATTTTTACGTCCATAACCTCATC  
TCCGCACACTTCTACTAATTGACGATATGGGTTTTACGCCCTTGCATCCAAGAATCGAA  
TCACTTCGCGAATTCTGCACTTTGCGGAAATGGCGATTGGAAGACTCATCGAAGCTGACC  
TGGCAAGAACAAGGATTGCGCGATCTGACTAAAATGACTGCCAAAGCACAACCTGGACATG  
TCAGCTGATCGGTGGACCACGTGTTTTAAAGGTGAGGAGTTACCCAAGGAGGCTGTGTCTG  
TCGGATTTGCGCTAACGTAATTATGTGGTCCACCAGCGTGTGGAGATCTTACTTTTGAA  
AAACCCCTCCTTGATTTTTCCAAGTGAAGACGGAGCTCTGCCTTCTACAGGCAAATCTTA

AAATTACAAGACTGGGCCATTGTGGCGCCTAAAAAAGTTAACGTACCAAAATGAATGCAC  
CATAATGCATA

>Btmar2.5|gi|1092455237|gb|MAMS01000094\_1|:5245361-5245875  
gi|1092455237|gb|MAMS01000094.1|:5245361-5245875 Bemisia tabaci isolate MEAM1 Scaffold320,  
whole genome shotgun sequence 515 bp

ACCTGACCTGGCTCTGTGTGATTTTTCTTATTTCCACGACTTAAATTTACCTTGAAAGG  
TCGACGTTTTCAAACCATTCTGGAAATCCAAGAGAACACCCTGTAGAAATTGCGATCAAT  
CAAATCTGAGGATTTCCAACAGTGTTCTCTCCAGTTGAAGAAACGGTGGAAAAAATGCA  
TCGATAAAGCTGGCAAGTATTTTGAAGGGGATAGGTTATGACTTGGTAAGCTTTTAAGCA  
TTTGAATAGAGCAACAAATTTTAACTTAAATCCTGGGTTTTCTTAAGTTGTATCTAAA  
TTTGTCTTGAAATAAAGACAAAAATCGCAACTCGAGTTTGACTTTCCTTCATTCCAAAGC  
GTGTAGTTTCCTTACCAATACGAATTTTGCATTCTGTAAAAACAAGCATCTTCAGTAGC  
TTATTAGCTTTGAAACAAGCCCCAAAAAACTTCATTACGACGCTTGGTTCGTCTTCTATG  
ACAAAAGTCCGGTTTCTTTGGGACAGCCCTCGTA

>Btmar2.6|gi|1092455566|gb|MAMS01000020\_1|:9258537-9259142  
gi|1092455566|gb|MAMS01000020.1|:9258537-9259142 Bemisia tabaci isolate MEAM1 Scaffold14,  
whole genome shotgun sequence 606 bp

TACGAGGGGCGTTCGTAAAGTAAGTATATATCTTTATTTTCTCCGGAATAATGAAGATA  
AATTAACCGGTAAAAAGTGTTTAAACCGTCATACTTTCAGCTTTTCAAAAAGCCTTTGT  
TTTTGAATTTGGTCTACCCGTTTCGCGAGTGACGTCATTTTCCCGCGCCCATCTCTCGT  
CACCGCGTGTCCAAATATTCGAACGCGGCGGAGTTCCTCAGACGAGTGAGTACGCACGT  
TTTCACTTTAAAAAAGGTTGTAACACCATTAATTGGATTCATATGTGAACTTTCAGGCT  
TTGAATTGTCTTACCTTGCTTTTCGACATGATCTCCACCCAGTTGAACACATTTCTGATT  
ATATGTTAGCAGTTTGTGGATTCAATCTTCAAAAAAGTGCGCATATCCTGTCGTTGGAAT  
CATTTTTTTACAGCTTCTTGCAACTCTGCGTCGGTGGAGAACTTTCGGCTACCCAAGCTC  
TTCTTTAACGCAGGAAAAAGATGAAAATCGCGGTGAGTCATCATCGGTGAGTACGATGGA  
TGAGGAAAAAGGTCCCATTTGAATGAGGCGAACAAGTCTCTAGTCACATGAGCCACATGA  
GGCCTG

>Btmar2.7|gi|1092455544|gb|MAMS01000025\_1|:699250-699854  
gi|1092455544|gb|MAMS01000025.1|:699250-699854 Bemisia tabaci isolate MEAM1 Scaffold147,  
whole genome shotgun sequence 605 bp

AACAGTGGACAGTGCTTACTACTGTAAAGTTTTGGCCGAGCTGCGGAAGCATGTTGCGCG  
GAAGCGGCCGCATTGAAAGCTGTTTGGCTTTTCCACCAGGATAACGCTCGGCCTCATAC  
GTCAAATTACACCAAGAATTCTTTGCAAAAAATGGTATTGAAAGTATCCGCCACCCACC  
GTACAGCCCCGACCTCGCACCATGCGATTTTTGGCTCTTCCCCACGCTCAAGAAGGGAAT  
GCGCGGCTGCAAGTTTGAGTCGAAGGCAGAAATCAAGACCGCAGTCGAGAAGTTCTTCAA  
CACCTTCAGATCGAAGAATTTATAAAACAATGACCGAAAAATGGCAAGAACGCATGAG  
ATTGTGCATCAAGTCTCACGGACAATACTTCGAAAAGGAATCGAACAATTCATCATTGTT  
AGCAAGTAGCGAAGACGAAGCTTGAAACTTGTAACCTCTCGGTAAGAATAAATTTCTTCA  
AAAAACGGTAGGCTGAATTTTTACTCCTCTCACGGAAAACGTCATAACTCGGTCAATTTT  
TGACCGATTTTGATGATCTTGGTCTTAATCGATAGGTATTGAGTTGATCTTTAAACGCG  
ACCAA

>Btmar2.8.1\_gi-1092428043-gb-MAMS01017495\_1-:67688-68667  
gi-1092428043-gb-MAMS01017495.1-:67688-68667 Bemisia tabaci isolate MEAM1 Scaffold831, whole  
genome shotgun sequence 980 bp

TACGTAGGGTGTCCCAAAAGTACCGGGACTGGTTCTGTAACCTCAAAGTAAGATAGATG  
CAGACATGATTTTGGTTTCATTTTAAAGATCAACTCAATACCTATCGATTAAAACCAAGA  
TCAGCTCAATCGAATAAAAATTGACCGAGTTATGACAATTTGAAATTAGTGAGGAAAGTT  
TACCCCTACGGTTTTTAGGAAGATTTTCGCTTACCAGGATTCAAAAAGTTAATATTCGT  
ATCCACTTTCCTCCGAATCTTCCATAACTTCCTTTTGCTTTTCAAAGTACCGTCCATCAA  
ACCGGATGCATTTTTTCATGCGCTCTTGCCACTTATCCAACATTGTTTTCTGAATTCTT  
CCTCTGGGATGGAGTTGAAGAAGTTTTGAATTGCATTCTGGATTTTGTCTTCGATACGA  
ATCTTCGTCCGCGAAGCTCCTTTTAAAGCGCAGGAAACATCCAAAAATCACATGGAGCCA  
AGTCAGGGCTATAAGGGGGATGAGGGATTGTTTCAACTCCATTTTTACTCATAAATTCAC  
GTGTTAAGCTCGATGTGTGAGGCCGCGCATTGTCTTGATGGAGTATCCACGAAGCTTTCA  
AGTCCGACCGTTTCCGGGAAATGTGCATTCTCAACTCCTTTAGTACTTTGCAATAATACG  
CACTGTCAACTGTTGTGTTTGATGGTACAAAATGTTGATAAATGACACCTCGAAAATAAA  
AAACACAATAAGCATCACTTTATCGGCCGACTTTTCGATTTACGGCGATGAAGAATCTT  
CCTTAAAAACCGTAGGCGTAAACTTTCCTCGCTGATTTCAAATTGCCATAACTCGGTCAA  
TTTTTATCCGATTGAGCTGATCTTGGTTTTAATCGATAGGTATTGAGTTGATCTTTAAAA

TGAAATCAAGATCATGTCTGTATCTATCTTACTTTTGAAGTTACAGAACAAGTCCCGGTG  
CTTTGGGACACCTTATGTA

--

>Btmar2.8.2\_gi-1092452480-gb-MAMS01001206\_1-:140940-141919  
gi-1092452480-gb-MAMS01001206.1-:140940-141919 Bemisia tabaci isolate MEAM1 Scaffold1339,  
whole genome shotgun sequence 980 bp

TACGTAGGGTGTCCCAAAAGTACCGGGACTGGTTCTGTAACCTCAAAAGTAAGATAGATA  
CAGACATGATCTTGATTTTATTTTAAAGATCAACTCAATACCTATCGATTAACCAAGA  
TCAGCTCAATCGAATAAAATTGACCGAGTTATGACAATTTGAAATTAGTGAGGAAAGTT  
TACCCCTACGGTTTTTAGGAAGATTTTCGCTTACCAGGATTCAAAAAGTTAATATTCGT  
ATCCACTTTCCTCCGAATCTTCATAACTTCCTTTTGCTTTTCAAAGTACCGTCCATCAA  
ACCGGATGCACTTTTTCATGCGCTCTGCCACTTATCCAACATTGTTTTCTGAATTCTT  
CCTCTGGGATGGAGTTGAAGAAGTTTTGAATTGCATTCTGGATTTTGTCTTCGATACGA  
ATCTTCGTCCGCGAAGCTCCTTTTAAGCGCAGGAAACATCCAAAAATCACATGGAGCCA  
AGTCAGGGCTATAAGGGGGATGAGGGATTGTTTCAACTCCATTTTCACTCATAAATTCAC  
GTGTTAAGCTCGATGTGTGAGGCCGCGCATTGTCTTGATGGAGTATCTACGAAGCTTTCA  
AGTCCGACCGTTTCCGGGAAATGTGCATTCTCAACTCCTTTAGTACTTTGCAATAATACG  
CACTGTCAACTGTTGTGTTTGATGGTACAAAATGTTGATAAATGACACCTCGAAAATAAA  
AAAACACAATAAGCATCACTTTATCGCCGACTTTTCGATTTACGGCGATGAAGAATCTT  
CCTTAAAAACCGTAGGCGTAACTTTCTCGCTGATTTCAAATTGCCATAACTCGGTCAA  
TTTTTATCCGATTGAGCTGATCTTGGTTTTAATCGATAGGTATTGAGTTGATCTTTAAAA  
TGAAATCAAGATCATGTCTGTATCTATCTTACTTTTGAAGTTACAGAACAAGTCCCGGTG  
CTTTGGGACACCTTACGTA

--

>Btmar2.8.3\_gi-1092455116-gb-MAMS01000124\_1-:3916509-3917488  
gi-1092455116-gb-MAMS01000124.1-:3916509-3917488 Bemisia tabaci isolate MEAM1 Scaffold403,  
whole genome shotgun sequence 980 bp

TACGTAGGGTGTCCCAAAAGTACCGGGACTGGTTCTGTAACCTCAAAAGTAAGATAGATG  
CAGACATGATTTTGGTCTCATTTTAAAGATCAACTCAATACCTATCGATTAACCAAGA  
TCAGCTCAATCGAATAAAATTGACCGAGTTATGACAATTTGAAATTAGTGAGGAAAGTT

TACCCCTACGGTTTTTAGGAAGATTTTCGCTTACCAGGATTCAAAAAGTTAATATTCGT  
ATCCACTTTCCTCCGAATCTTCCATAACTTCCTTTCGCTTTTCAAAGTACCGTCCATCAA  
ACCGGATGCACTTTTTCATGCGCTCTTGCCACTTATCCAACATTGTTTTCTGAATTCTT  
CCTCTGGGATGGAGTTGAAGAAGTTTTGAATTGCATTCTGGATTCGGTCTTCGATACGA  
ATCTTCGTCCGCGAAGCTCCTTTTAAAGCGTAGGAAACATCCAAAAATCACATGGAGCCA  
AGTCAGGGCTATAAGGGGGATGAGGGATTATTTCAACTCCATTTTACTTATAAATTCAC  
GTGTTAAGCTCGATGTGTGAGGCCGCGCATTGTCTTGATGGAGTATCCACGAAGCTTTCA  
AGTCCGACCGTTTCCGGGAAATGTGCATTCTCAACTCCTTTAGTACTTTGCAATAATACG  
CACTGTCAACTGTTGTGTTTGATGGTACAAAATGTTGATAAATGACACCTCGAAAATAAA  
AAACACAATAAGCATCACTTTATCGGCCGACTTTTCGATTTACGGCGATGAAGAATCTT  
CCTGAAAAACCGTAGGCGTAACTTTCCTCGCTGATTTCAAATTGCCATAACTCGGTCAA  
TTTTTATCCGATTGAGCTGATCTTGGTTTTAATCGATAGGTATTAAGTTGATCTTTAAAA  
TGAAATCAAGATCATGTCTGTATCTATCTTACTTTCGAAGTTACAGAACAAGTCCCGGTG  
CTTTTGGGACACCTTATGTA

--

>Btmar2.8.4\_gi-1092455116-gb-MAMS01000124\_1-:4689601-4690579  
gi-1092455116-gb-MAMS01000124.1-:4689601-4690579 Bemisia tabaci isolate MEAM1 Scaffold403,  
whole genome shotgun sequence 979 bp

TACGTCGGGTGTCCCAAAGTACCTCGACTGGTTCTGTAACCTCAAAAAGTAAGATAGATA  
CAGACATGATTTTGGTCTCATTTTAAAGATCAACTCAATACCTATCGATTAACCAAGA  
TCAGCTCAATCGGATAAAAAGTGACCGAGTTATGACAATTTGAAATTAGTGAGGAAAGTT  
TACCCCTACGGTTTTTAGGAAGATTTTCGCTTACCAGGATTCAAAAAGTTAATATTCGT  
ATCCACTTTCCTCCGAATCTTCCATAACTTCCTTTTGCTTTTCAAAGTACCGTCCATCAA  
ACCGGATGCACTTTTTCATGCGCTCTTCCACTTATCCAACATTGTTTTCTGAATTCTT  
CCTCTGGGATGGCGTTGAAAAAGTTTTGAATTGCATTCTGGATTCGGTCTTCGATTCTGA  
ATCTTCGTCCGCGAAGCTTCTTTTAAAGCGTAGGAAACATCCAAAAATCACATGGAGCCA  
AGTCAGGGCTGTAAGGGGGATGAGGGATTGTTTCAACTCATTTTACTCATAAATTCACG  
TGTTAAGCTCGATGTGTGAGGCCGCGCTTGTCTTGATGGAGTATCCAAGCTTCAAGTCC  
GACCGTTTCCGGGAAATGTGCATTCTCAACTCCTTTAGCACTTTGCAATAATACGCACTC  
TCAACTGTTGTGTTTGGTGGTACAAAATGTTGATACTTAAATGACACCTCGAAAATAAAA

TAACACAATAAGCATCACTTTATAGGCCGACTTTTCGATTTACGGCGATGAAGAATCTTC  
CTTAAAAACCGTAGGCGTAACTTTCTCGCTGATTTAAAATTGCCATAACTCGTCCAAT  
TTTTATCCGATTGAGCTGATCTTGGTTTTAATCGATAGGTATTGAGTTGATCTTCAAAAT  
GAGATCAAGATCATGTCTGTATCTATCTTACTTTTGAAGTTACAGAACAAGTCCCGGTGC  
TTTTGGGACACCTTATGTA

--

>Btmar2.8.5\_gi-1092454721-gb-MAMS01000233\_1-:2320086-2321067  
gi-1092454721-gb-MAMS01000233.1-:2320086-2321067 Bemisia tabaci isolate MEAM1 Scaffold699,  
whole genome shotgun sequence 982 bp

TACGTAGGGTGTCCCAAAAGTACCGAGACTGGTTCTGTAACCTCAAAAGTAAGATAGATA  
CAGACATGATTTTGGTCTCATTTTGAAGATCAACTCAATACCTATCGATTAACCAAGA  
TCAGCTCAATCGAATAAAAATTGACCGAGTTATGACAATTTGAAATTAGTGAGGAAAGTT  
TACCCCTACGGTTTTTAGGAAGATTTTCGCTTACCAGGATTCAAAAGTTAGTATTCGT  
ATCCACTTTCCTCCGAATCTTCCATAACTTCCTTTGCTTTTCAAAGTACCGTCCATCAA  
ACCGGATGCACTTTTTCATGCGCTCTTGCCACTTATCCAACATTGTTTTCTGAATTCTT  
CCTCTGGGATGGCGTTGAAGAAGTTTTGAATTGCATTCTGGATTTTGTCTTCGATACGA  
ATCTTCGTCCGCGAAGCTCCTTTTAAAGCGTAGGAAACATCCAAAAATCACATGGAGCCA  
AGTCAGGGCTATAAGGGGGATGAGGGATTGTTTCAACTCCATTTTACTCATAAATTCAC  
GTGTTAAGCTCGATGTGTGAGGCCGCGCATTGTCTTGATGGAGTATCCACGAAGCTTCCA  
AGTCCGACCGTTTCCGGGAAATGTGCATTCTCAACTCCTTTAGTACTTTGCAATAATACG  
CACTGTCAACTGTTGTGTTTGATGGTACAAAATGTTGATAAATGACACCTCAAAAATAAA  
AAAACACAATAAGCATCACTTTATCGGCCGACTTTTCGATTTACGGCGATGAAGAATCTT  
CCTTAAAAACCGTAGGCGTAACTTTCTAGCTGATTTCAAATTGCCATAACTCGGTCAA  
TTCTTATCCGATTGAGCTGATCTTGGTTTTAATCGATAGGTATTGAGTTGATCTTTAAAA  
TGAAGTCAAGGGCATGTCTGTATCTATCTTACTTTTGAAGTTACAGAACAAGTCCCGCGG  
TGCTTTTGGGACACCTTATGTA

>Btmar2.8.6\_gi-1092454721-gb-MAMS01000233\_1-:59897-60876  
gi-1092454721-gb-MAMS01000233.1-:59897-60876 Bemisia tabaci isolate MEAM1 Scaffold699, whole  
genome shotgun sequence 980 bp



TACGTAGGGTGTCCCAAAAGTACCGGGACTGGTTCTGTAACCTCAAAAGTAAGATAGATG  
CAGACATGATTTTGGTCTCATTTTAAAGATCAACTCAATACCTATCGATTAACCAAGA  
TCAGCTCAATCGGATAAACATTGACCGAGTTATGACCATTGAAATTAGTGAGGAAAGTT  
TACCCCTACGGTTTTTAGGAAGATTTTCGCTTACCAGGATTTAAAAAGTTAATATTCGT  
ACCCACTTTCCTCCGAATCTTCCATAACTTCCTTTTGCTTTCAAAGTACCGTCCATCAA  
ACCGGATGCACTTTTTCATGCGCTCTTGCCACTTATCCAAAATTGTTTTCTGAATTCTT  
CCTCTGGGATGGCGTTGAAAAAGTTTTGAATTGCATTCTGGATTTCGGTCTTCGATTCTGA  
ATCTTCGTCCGCGAAGCTCCTTTTAAAGCGTAGGAAACATCCAAAAATCACATGGAGCCA  
CGTCAGGGCTGTAAGGGGGATGAGGGATTGTTCAACTCCATTTTACTCATAAATTCAC  
GTGTTAAGCTCGATGTGTGAGGCCGCGCTTGTCTTGATGGAGTATCCACGAACTTTCAA  
GTCCGACCGTTTCCGGGAAATGTGCATTCTCAACTCCTTACTACTTTGCAATAATACGC  
ACTGTCAACTGTTGTGTTTGGTGGTACAAAATGTTGATAAATGACACCTCGAAAATGAAA  
AAAACACAATAAGCATCACTTTATCGGCCGACTTTTCGATTTACGGCGATGAAGAATCTT  
CCTTAAAAACCGTAGGCGTAACTTTCTCGCTGATGTCAAATTGCCATAACTCGGTCAA  
TTTTCATTCGATTGAGCTGACCTTGGTTTAAATCGATAGGTATTAAGTTGATCTTTAAAA  
TAAATCAAGATCATGTCTGTATCTATCTTACTTCCGAAGTTACAGAACAAGTCCCGGTG  
CTTTTGGGACACCTTATGTA

>Btmar2.8.7\_gi-1092454721-gb-MAMS01000233\_1-:1330945-1331881  
gi-1092454721-gb-MAMS01000233.1-:1330945-1331881 Bemisia tabaci isolate MEAM1 Scaffold699,  
whole genome shotgun sequence 937 bp

TAAGATAGATACAGACATGATTTTGGTTTCATTTTAGAGATCAACTCAATACCTGTCGAT  
TAAACCAAGATCAGCTCAATCGAATAAAAATTGACCGAGTTATGATAATTTGAAATTAG  
TGAGGAAAGTTTACCCCTACGTTTTTLAGGAAGATTTTCGCTTACCAGGATTCAAAAAG  
TTAATAATCGTATCCACTTTCCTCCGAATCTTCCATAACTTCCTTTTGCTTTCAAAGTA  
CCGTCCATCAAACCGGATGCACTTTTTCATGCGCTCTTGCCACTTATCCAACATTGTTTT  
CCTGAATTCTTCTCTGGGATGGAGTTGAGGAAGTTTTGAATTGCATTCTGGATTTCGGT  
CTTCGATACGAATCTTCGTCCGCGAAGCTCCTTTTAAAGCGTAGGAAACATCCAAAAATC  
ACATGGAGCCAAGTCAGGGCTATAAGGGGGATGAGGGATTGTTTCAACTCCATTTTACT  
CATAAATGCACGTGTTAAGCTCGATGTGTGAGGCCGCGCATTATTGTCTTGATGGCAGAG  
TATCCACGAAGCTTTCAAGTCCGACAGTTTCCGGGAAATGTGCTTCTCAACTCCTTTAG

TACTTTGCAATAATACGCACTGTCAACTGTTGTGTTTGATGGTACAAAATGTTGATAAAT  
GACACCTCGAAAATAAAAAAACACAATAAGCATCACTTTATCGGCCGACTTTTCGATTTA  
CGGCGATGAAGAATCTTCCTTAAAAACCGTAGGCGTAACTTTCCTCGCTGATTTCAAAT  
TACCATAACTCGGTCAATTTTTATCCGATTGAGCTGATCTTGAATTTAATCGATAGGTAT  
TGAGTTGATCTTTAAAATGAGATCAAGATCATGTCTGTATCCATCTTACTTTCGAAGTTA  
CAGAACAAGTCCCGGTGCTTTTGGGACACCTTATGTA

--

>Btmar2.8.8\_gi-1092454789-gb-MAMS01000210\_1-:393885-394864  
gi-1092454789-gb-MAMS01000210.1-:393885-394864 Bemisia tabaci isolate MEAM1 Scaffold650, whole  
genome shotgun sequence 980 bp

TACGTAGGGTGTCCCAAAAGTACCGGGACTGGTTCTGTAACCTCAAAAGTAAGATAGATA  
CAGACATGATTTTGGTCTCATTTTAAAGATCAACTCAATACCTATCGATTAACCAAGA  
TCAGCTCAATCGAATAAAAATTGACCGAGTTATGACAATTTGAAATTAGTGAGGAAAGTT  
TACCCCTACGGTTTTTAGGAAGATTTTCGCTTACCAGGATTCAAAAAGTTAATATTCGT  
ATCCACTTTCCTCCGAATCTTCATAACTTCCTTTTGCTTTTCAAAGTACCGTCCATCAA  
ACCGGATGCACTTTTTCATGCGCTCTTGCCACTTATCCAACATTGTTTTCTGAATTCTT  
CCTCTGGGATGGAGTTGAAGAAGTTTTGAATTGCATTCTGGATTTTGTCTTCGATACGA  
ATCTTCGTCCGTGAAGCTCCTTTTAAAGCGCAGGAAACATCCAAAAATCACATGGAGCCA  
AGTCAGGACTATAAGAGGGATGAGGGATTGTTTCAACTCCATTTTACTCATAAATTCAC  
GTGTTAAGCTCGATGTGTGGGGCCGCGCATTGTCTTGATGGAGTATCCACGAAGCTTTCA  
AGTCCGACCGTTTCCGGGAAATGTGCATTCTCAACTCCTTTAGTACTTTGCAATAATACG  
CACTGTCAACTGTTGTGTTTGATGGTACAAAATGTTGATAAATGACACCTCGAAAATAAA  
AAACACAATAAGCATCACTTTATCGGCCGACTTTTCGATTTACGGCGATGAAGAATCTT  
CCTTAAAAACCGTAGGCGTAACTTTCCTCGCTGATTTCAAATTGCCATAACTCGGTCAA  
TTTTTATCCGATTGAGCTGATCTTGGTTTTTATCGATAGGTATTGAGTTGATCTTTAAAA  
TGAAATCAAGATCATGTCTGTATCTATCTTACTTTCGAAGTTACAGAACAAGTCCCGGTG  
CTTTTGGGACACCTTATGTA

>Btmar2.8.9\_gi-1092454789-gb-MAMS01000210\_1-:2177078-2178057  
gi-1092454789-gb-MAMS01000210.1-:2177078-2178057 Bemisia tabaci isolate MEAM1 Scaffold650,  
whole genome shotgun sequence 980 bp

TACGTAGGGTGTCCCAAAAGTACCGGGACTGGTTCTGTAACCTCAAAAGTAAGATAGATG  
CAGACATGATTTTGGTCTCATTTTAAAGATCAACTCAATACCTATCGATTAACCAAGA  
TCAGCTCAATCGAATAAAAATTGACCGAGTTATGACAATTTGAAATTAGTGAGGAAAGTT  
TACCCCTACGGTTTTTAGGAAGATTTTCGCTTACCAGGATTCAAAAAGTTAATATTCCT  
ATCCACTTTCCTCCGAATCTTCATAACTTCCTTCGCTTTTCAAAGTACCGTCCATCAA  
ACCGGATGCACTTTTTCATGCGCTCTGCCACTTATCCAAAATTGTTTTCTGAATTCTT  
CCTCTGGGATGGAGTTGAAGAAGTTTTGAATTGCATTCTGGATTTTCGGTCTTCGATACGA  
ATCTTCGTCCGCAAAGCTCCTTTTAAAGCGTAGGAAACATCCAAAATCACATGGAGCCA  
AGTCAGGGCTATAAGGGGGATGAGGGATTGTTCAACTCCATTTTACTTATAAATTCAC  
GTGTTAAGCTCGATGTGTGAGGCCGCGCATTGTCTTGATGGAGTATCCACGAAGCTTTCA  
AGTCCGACCGTTTCCGGGAAATGTGCATTCTCAACTCCTTTAGTACTTTGCAATAATACG  
CACTGTCAACTGTTGTGTTTGATGGTACAAAATGTTGATAAATGACACCTCGAAAATAAA  
AAAACACAATAAGCATCACTTTATCGGCCGACTTTTCGATTTACGGCGATGAAGAATCTT  
CCTGAAAAACCGTAGGCGTAACTTTCCTCGCTGATTTCAAATTGCCATAACTCGGTCAA  
TTTTTATTCGATTGAGCTGATCTTGGTTTTAATCGATAGGTATTAAGTTGATCTTTAAAA  
TGAAATCAAGATCATGTCTGTAACCTATCTTACTTTCGAAGTTACAGAACAAGTCCCGGTG  
CTTTTGGGACACCTTATGTA

--

>Btmar2.8.10\_gi-1092454418-gb-MAMS01000356\_1-:1103150-1104102  
gi-1092454418-gb-MAMS01000356.1-:1103150-1104102 Bemisia tabaci isolate MEAM1 Scaffold1040,  
whole genome shotgun sequence 953 bp

TACGTAGGCTGTCCCAAAAGTACCGGGACTGGTTCTGTAACCTCAAAAGAAAGATAGATG  
CAGACATGATTTTGGTCTCATTTTAAAGATCAACTCAATACCTATCGATTAACCAAGA  
TCAGCTCAATCGAATAAAAATTGACCGAGTTATGACAATTTGAAATTAGTGAGGAAAGTT  
TACCCCTACGGTTTTTAGGAAGATTTTCGCTTACCAGGATTCAAAAAGTAAATATTCGT  
ATCCACTTTCCTCCGAATCTTCATAACTTCCTTTTGCTTTTCAAAGTACCGTCCATCAA  
ACCGGATGCACATTTTTCATGCGCTCTGCCACTTATCCAACATTGTTTTCTGAATTCTT  
CCTCTGGGATGGAGTTGAAAAAGTTTTGAATTGCATTCTGGATTTTCGGTCTTCGATACGA  
ATCTTCGTCCGCGAAGCTCCTTTTAAAGCGTAGGAAACATCCAAAATCACATGGAGCCA

AGTCAGGGCTATAAGGGGGATGAGAGATTGTTTCAACTCCATTTTTACTCATAAATTCAC  
GTGTTAAGCTCGATGTGTGAGGCCGCGCATTGTCTTGATGGAGTATCCACGAAGCTTTCA  
AGTCCGACCGTTTCCGGGAAATGTGCATTCTCAACTCCTTTAGTACTTTGCAATAATACA  
CACTGTCAATTGTTGTGTTTGATGGTACAAAATGTTGATAAATGACACCTCGAAAATAAA  
AAAACACAATAAGCATCACTTTATCGGCCGACTTTTCGATTTACGGCGATGAAGAATCTT  
CCTTAAAAACCGTAGGCGTAAACTTTCTCGCTGATTTCAAATTGCCATAACTTGGTCAA  
TTTTTATCCGATTGAGCTGATATTGGTTTTAATCGATAGGTATTGAGTTGATCTTTAAAA  
TGAGATCAAGATCATGTCTGTATCTATCTTACTTTTGAAGTTACAGAACAAGT

--

>Btmar2.8.11\_gi-1092455288-gb-MAMS01000087\_1:-4119501-4120480  
gi-1092455288-gb-MAMS01000087.1:-4119501-4120480 Bemisia tabaci isolate MEAM1 Scaffold297,  
whole genome shotgun sequence 980 bp

TACGTAGGGTGTCCCAAAAGTACCGGGACTGGTTCTGTAACCTCAAAGTAAGATAGATA  
CAGACATGATTTTGGTCTCATTTTAAAGATCAACTCAATACCTATCGGTAAAACCAAGA  
TCAGCTCAATCGAATAAAAATTGACCGAGTTATGACAATTTGAAATTAGTGAGGAAAGTT  
TACCCCTACGGTTTTTAGGAAGATTTTCGCTTACCAGGATTCAAAAAGTTAATATTCGT  
ATCCACTTTCCTCCGAATCTTCCATAACTTCCTTTTGCTTTTCAAAGTACCGTCCATCAA  
ACCGGATGCACTTTTTCATGCGCTCTTGCCACTTATCCAACATTGTTTCTGAATTCTT  
CCTCTGGGATGGAGTTGAAGAAGTTTTGAATTGCATTCTGGATTTTGTCTTCGATACGA  
ATCTTCGTCCGCGAAGCTCCTTTTAAAGCGCAGGAAACATCCAAAAATCACATGGAGCCA  
AGTCAGGACTATAAGAGGGATGAGGGATTGTTTCAACTCCATTTTTACTCATAAATTCAC  
GTGTTAAGCTCGATGTGTGAGGCCGCGCATTGTCTTGATGGAGTATCCACGAAGCTTTCA  
AGTCCGACCGTTTCCGGGAAATGTGCATTCTCAACTCCTTTAGTACTTTGCAATAATACG  
CACTGTCAACTGTTGTGTTTGATGGTACAAAATGTTGATAAATGACACCTCGAAAATAAA  
AAAACACAATAAGCATCACTTTATCGGCCGACTTTTCGATTTACGGCGATGAAGAATCTT  
CCTTAAAAACCGTAGGCGTAAACTTTCTCGCTGATTTCAAATTGCCATAACTCGGTCAA  
TTTTTATCCGATTGAGCTGATCTTGGTTTTAATCGATAGGTATTGAGTTGATCTTTAAAA  
TGAAATCAAGATCATGTCTGTATCTATCTTACTTTTGAAGTTACAGAACAAGTCCCGGTG  
CTTTTGGGACACCTTATGTA

--

>Btmar2.8.12\_gi-1092455288-gb-MAMS01000087\_1-:4241369-4242348  
gi-1092455288-gb-MAMS01000087.1-:4241369-4242348 Bemisia tabaci isolate MEAM1 Scaffold297,  
whole genome shotgun sequence 980 bp

TACGTAGGGTGTCCCAAAAGTACCGGGACTGGTTCTGTAACCTCAAAGTAAGATAGATG  
CAGACATGATTTTGGTCTCATTTTAAAGATCAACTCAATACCTATCGATTAAAACCAAGA  
TCAGCTCAATCGAATAAAAATTGACCGAGTTATGACAATTTGAAATTAGTGAGGAAAGTT  
TACCCCTACGGTTTTTAGGAAGATTTTCGCTTACCAGGATTCAAAAAGTTAATATTCGT  
ATCCACTTTCCTCCGAATCTTCCATAATTTCTTTTGCTTTTCAAAGTACCGTCCATCAA  
ACCGGATGCACTTTTTCATGCGCTCTTGCCACTTATCCAACATTGTTTTCTGAATTCTT  
CCTCTGGGATGGAGTTGAAGAAGTTTTGAATTGCATTCTGGATTCGGTCTTCGATACGA  
ATCTTCGTCCGCGAAGCTCCTTTTAAAGCGTGGGAAACATCCAAAAATCACATGGAGCCA  
AGTCAGCGCTATTAGGGGGATGAGGGATTGTTTCAACTCCATTTTACTCATAAATTCAC  
GTGTTAAGCTCGATGTGTGAGGCCGCGCATTGTCTTGATGGAGTATCCACGAAGCTTTCA  
AGTCCGACCGTTTCCGGGAAATGTGCATTCTCAACTCCTTTAGTACTTTGCAATAATACG  
CACTGTCAACTGTTGTGTTTGATGGTACAAAATGTTGATAAATGACACCTCGAAAATAAA  
AAAACACAATAAGCATCACTTTATCGGCCGACTTTTCGATTTACGGCGATGAAGAATCTT  
CCTTAAAAACCGTAGGCGTAAACTTTCCTCGCTGATTTCAAATTGCCATAACTCGGTCAA  
TTTTATCCGATTGAGCTGATCTTGGTTTTAATCGATAGGTATTGAGTTGATCTTTAAAA  
TGAAATCAAGATCATGTCTGTATCTATCTTACTTTCGAAGTTACAGAACAAGTCCCGGTG  
CTTTTGGGACACCTTATGTA

>Btmar2.8.13\_gi-1092455288-gb-MAMS01000087\_1-:4421325-4422302  
gi-1092455288-gb-MAMS01000087.1-:4421325-4422302 Bemisia tabaci isolate MEAM1 Scaffold297,  
whole genome shotgun sequence 978 bp

CGTAGGGTGTCCCAAAAGTACCGGGACTGGTTCTGTAACCTCAAAGTAAGATAGATACA  
GACATGATTTTGGTTTCATTTTAAAGATCAACTCAATACCTATCGATTAAAACCAAGATC  
AGCTCAATCGAATAAAAATTGACCGAGTTATGACAATTTGAAATTAGTGAGGAAAAGTTTA  
CCCCTACGGTTTTTAGGAAGATTTTCGCTTACCAGGATTCAAAAAGTTAATATTCGTAT  
CCACTTTCCTCCGAATCTTCCATAACTTCTTTTGCTTTTCAAAGTACCGTCCATCAAAC  
CGGATGCACTTTTTCATGCGCTCTTGCCACTTATCCAACATTGTTTTCTGAATTCTTCC  
TCTGGGATGGAGTTGAAGAAGTTTTGAATTGCATTCTGGATTCGGTCTTCGATACGAAT

CTTCGTCCGCGAAGCTCCTTTTTAAGCGTGGGAAACATCCAAAAATCACATGGAGCCAAG  
TCAGCGCTATTAGGGGGATGAGGGATTGTTTCAACTCCATTTTACTCATAAATTCACGT  
GTTAAGCTCGATGTGTGAGGCCGCGCATTGTCTTGATGGAGTATCCACGAAGCTTTCAAG  
TCCGACCGTTTCCGGGAAATGTGCATTCTCAACTCCTTTAGTACTTTGCAATAATACGCA  
CTGTCAACTGTTGTGTTTGATGGTACAAAATGTTGATAAATGACACCTCGAAAATAAAAA  
AACACAATAAGCATCACTTTATCGGCCGACTTTTCGATTACGGCGATGAAGAATCTTCC  
TTAAAAACCGTAGGCGTAAACTTTCTCGCTGATTTCAAATTGCCATAACTCGGTCAATT  
TTTATCCGATTGAGCTGATCTTGTTTAAATCGATAGGTATTGAGTTGATCTTTAAATG  
AAATCAAGATCATGTCTGTATCTATCTTACTTTGAAGTTACAGAACAAGTCCCGGTGCT  
TTTGGGACACCTTACGTA

--

>Btmar2.8.14\_gi-1092455288-gb-MAMS01000087\_1-:4305728-4306707  
gi-1092455288-gb-MAMS01000087.1-:4305728-4306707 Bemisia tabaci isolate MEAM1 Scaffold297,  
whole genome shotgun sequence 980 bp

TACGTAGGGTGTCCCAAAGTACCGGGACTGGTTCTGTAACCTCAAAGTAAGATAGATA  
CAGACATGATTTTGGTCTCATTTTAAAGATCAACTCAGTACCTATCGATTAAACCAAGA  
TCAGCTCAATCGAATGAAAATTGACCGAGTCATGACAATTTGAAATTAGCGAGGAAAGTT  
TACCCCTACGGTTTTTAGGAAGATTTTCGCTTACCAGGATTCAAAAAGTTAGTATTCGT  
ATCCACTTTCCTCCGAATCTTCATAACTTCCTTTTGCTTTTAAAGTACCGTCCATCAA  
ACCGGATGCACTTTTTCATGCGCTCTTGCCACTTATCCAACATTGTTTTCTGAATTCTT  
CCTCTGGGATGGAGTTGAAGAAGTTTGAATTGCATTCTGGATTTCGGTCTTCGATACGA  
ATCTTCGTCCGCTAAGCTCCTTTTAAAGCGTAGGAAACATCCAAAAATCACATGGAGCCA  
AGTCAGGGCTATAAGGGGGATGAGGGATTGTTTCAACTCCATTTTACTCATAAATTCAC  
GTGTTAAGCTCGATGTGTGAGGCTGCGCATTGTTTTGATGGAGTATCCACGGAGCTTTCA  
AGTCCGACGGTTTCCGGGAAATGTGCATTCTCAACTCCTTTAGCACTTTGCAATAATACG  
CACTGTCAACTGTTGTGTTTGATGGTACAAAATGTTGATAAATGACACCTCGAAAATAAA  
AAAACACAATAAGCATCACTTTATCGGCCGACTTTTCGATTACGGCGATGAAGAATCTT  
CCTTAAAAACTGTAGGCGTAAACTTTCTCGCTGATTTCAAATTGCCAGAACTCGGTCAA  
TTTTTATCCGATTGAGCTGATCTTGTTTAAATCGATAGGTATTGAGTTGATCTTTAAAA  
TGAAATCAAGATCATGTCTGTATCTATCTTACTTTGAAGTTACAGAACAAGTCCCGGTG

GTTTTGGGACACCTTATGTA

--

>Btmar2.8.15\_gi-1092455288-gb-MAMS01000087\_1-:5110454-5111437  
gi-1092455288-gb-MAMS01000087.1-:5110454-5111437 Bemisia tabaci isolate MEAM1 Scaffold297,  
whole genome shotgun sequence 984 bp

TACGTCGGGTGTCCAAAAGTACCGGGACTGGTTCTGTAACCTCAAAAGTAAGACAGATA  
CAGACATGATTTTGGTCTCATTTTAAAGATCAACTCAATATCTATCGATAAAAAACCAAG  
ATCAGCTCAATCGAATAAAAATTGACCGAGTCATGACAATTTGAAATTAGTGAGGAAAGT  
TTACCCCTACGGTTTTTAGGAAGATTTTCGCTTACCAGGATTCAAAAAGTTAATATTCG  
TATCCACTTTCCTCCGAATCTTCCATAACTTCCTTTTGCTTTCAAAGTACCGTCCATCA  
AACCGGATGCACTTTTTTCATGCGCTCTTCCACTTATCCAACATTGTTTTCTGAATTCT  
TCCTCTGGGATGGCGTTGAAAAAGTATTGAATTGCATTCTGGATTTCGGTCTTCGATTCTG  
AATCTTCGTCCGCGAAGCTTCTTTTAAGCGTAGGAAACATCCAAAAATCACATGGAGCC  
AAGTCAGGGCTCTAAGGGGGATGAGGGATTGTTTCAACTCCATTTTACTCATAAATTCA  
CGTGTTAAGCTCGATGTGTGAGGCCGCGCTTGTCTTGATGGAGTATCCACGAAGCTTTCA  
AGTCCGACCGTTTCCGGGAAATGTGCACTCTCAACTCCTTTAGTACTTTGCAATAATACG  
CACTGTCAACTGTTGTGTTTGGTGGTACAAAATGTTGATACTTAAATGACACCTCGAAAA  
TAAAATAACACAATAAGCATCACTTTATAGGCCGACTTTTCGATTTACGGCGATGAAGAA  
TCTTCCTGAAAAACCGTAGGCGTAACTTTCCTCGCTGATTTCAAATTGCCATAACTCGG  
TCAATTTTTATCCGATTGAGCTGATCTTGTTTTAATCGATAGGTATTGAGTTGATCTTT  
AAAATGAGATCAAGATCATGTCTGTATCTTACTTTCGAAGTTACAGAACAAGTCCC  
GGTGCTTTTGGGACACCTTATGTA

>Btmar2.8.16\_gi-1092455288-gb-MAMS01000087\_1-:3268152-3268880  
gi-1092455288-gb-MAMS01000087.1-:3268152-3268880 Bemisia tabaci isolate MEAM1 Scaffold297,  
whole genome shotgun sequence 729 bp

TACGTAGGGTGTCCAAAAGTACCGGGACTGGTTCTGTAACCTCAAAATTAAGATAGATA  
CAGACATGATTTTGGTCTCATTTTAAAGATCAACTCAATACCTATCGATTTAAACCAAGA  
TCAGCTCAATCGAATAAAAATTGACCGAGTTATGACAATTTGAAATTAGTGCGGAAAGTT  
TACCCCTACGGTTTTTAGGAAGATTTTCGCTTACCAGGATTTAAAAAGTTAATATTCGT  
ATCCACTTTCCTCCGAATCTTCCATAACTTCCTTTTGCTTTCAAAGTACCGTCCATCAA

ACCGGATGCACTTTTTCATGCGCTCTTGCCACTTATCCAACATTGTTTTCTGAATTATT  
CCTCTGGGATGGAGTTGAAGAAGTTTTGAATTGCATTCTGGATTCGGTCTTCGATACGA  
ATCTTCGTCCGCGAAGCTCCTTTTTAAGCGTGGGAAACATCCAAAAATCACATGGAGCCA  
AGTCAGCGCTATAAGGGGGATGAGGGATTGTTTCAACTCCATTTTACTCATAAATTCAC  
GTGTTAAGCTCGATGTGTGAGGCTGCGCATTGTTTTGATGGAGTATCCACGGAGCTTTCA  
AGTCCGACGGTTTCCGGGAAATGTGCATTCTCAACTCCTTTACTACTTTGCAATAATACG  
CACTGTCAACTGTTGTGTTTGATGGTACAAAATGTTGATAAATGACACCTCGAAAATAAA  
AAAACACAA

--

>Btmar2.8.17\_gi-1092455599-gb-MAMS01000015\_1-:5696255-5697234  
gi-1092455599-gb-MAMS01000015.1-:5696255-5697234 Bemisia tabaci isolate MEAM1 Scaffold130,  
whole genome shotgun sequence 980 bp

TACGTAGGGTGTCCCAAAGTACCGGGACTGGTTCTGTAACCTCAAAGTAAGATAGATG  
CAGACATGATTTTGGTCTCATTTTAAAGATCAACTCAATACCTATCGATTAACCAAGA  
TCAGCTCAATCGAATAAAAATTGACCGAGTTATGACAATTTGAAATTAGTGAGGAAAGTT  
TACCCCTACGGTTTTTAGGAAGATTTTCGCTTACCAGGATTCAAAAAGTTAATATTCGT  
ATCCACTTTCCTCCGAATCTTCATAACTTCCTTTTGCTTTTCAAAGTACCGTCCATCAA  
ACCGGATGCACTTTTTCATGCGCTCTTGCCACTTATCCAACATTGTTTTCTGAATTCTT  
CCTCTGGGATGGAGTTGAAGAAGTTTTGAATTGCATTCTGGATTTTGTCTTCGATACGA  
ATCTTCGTCCGCGAAGCTCCTTTTTAAGCGCAGGAAACATCCAAAAATCACATGGAGCCA  
AGTCAGGACTATGAGGGGGATGAGGGATTGTTTCAACTCCATTTTACTCATAAATTCAC  
GTGTTAAGCTCGATGTGTGAGGCCGCGCATTGTCTTGATGGAGTATCCACGAAGCTTTCA  
AGTCCGACCGTTTCCGGGAAATGTGCATTCTCAACTCCTTTAGTACTTTGTAATAATACG  
CACTGTCAACTGTTGTGTTTGATGGTACAAAATGTTGATAAATGACACCTCGAAAATAAA  
AAAACACAATAAGCATCACTTTATCGGCCGACTTTTCGATTTACGGCGATGAAGAATCTT  
CCTTAAAAACCGTAGGCATAAACTTTCCTCGCTGATTTCAAATTGCCATAACTCGGTCAA  
TTTTTATCCGATTGAGCTGATCTTGGTTTTAATCGATAGGTATTGAGTTGATCTTTAAAA  
TGAAATCAAGATCATGTCTGTATCTATCTTACTTTGAAGTTACAGAACAAGTCCCGGTG



CTTTTGGGACACCTTGTGTA

--

>Btmar2.8.18\_gi-1092454650-gb-MAMS01000255\_1-:301391-302365

gi-1092454650-gb-MAMS01000255.1-:301391-302365 Bemisia tabaci isolate MEAM1 Scaffold98, whole genome shotgun sequence 975 bp

TACGTAGGGTGTCCCAAAAGTACCGGGACTGGTTCTGTAACCTCAAAGTAAGATAGATA  
CAGACATGATTTTGGTCTCATTTTAAAGATCAACTCAATACCTATCGATTAAAACCAAGA  
TCAGCTCAATCGAATAAAAATTGACCGAGTTATGACAATTTGAAATTAGTGAGGAAAGTT  
TACCCCTACGGTTTTTAGGAAGATTTTCGCTTACCAGGATTCAAAAAGTTAATATTCGT  
ATCCACTTTCCTCCGAATCTTCCATAACTTCCTTTTGCTTTTCAAAGTACCGTCCATCAA  
ACCGGATGCACTTTTTCATGCGCTCTTGCCACTTATCCAACATTGTTTTCTGAATTCTT  
CCTCTGGGATGGAGTTGAAGAAGTTTTGAATTGCATTCTGGATTCGGTCTTCGATACGA  
ATCTTCGTCCGCGAAGCTCCTTTTAAAGCGTAGGAAACATCCAAAATCACATGGAGCCA  
AGTCAGGGCTATAAGGGGGATGAGGGATTGTTTCAACTCCATTTTACTCATAAATTCAC  
GTGTTAAGCTCGATGTGTGAGGCCGCGCATTGTCTTGATGGAGTATCCACGAAGCTTTCA  
AGTCCGACCGTTTCCGGGAAATGTGCATTCTCAACTCCTTTAGTACTTTGCAATAATACG  
CACTGTCAACTGTTGTGTTTGATGGTACAAAATGTTGATAAATGACACCTCGAAAATAAA  
AAACACAATAAGCATCACTTTATCGGCCGACTTTTCGATTTACGGCGATGAAGAATCTT  
CCTTAAAACCGTAGGCGTAAACTTTCCTCGCTGATTTCAAATTGCCATAACTCGGTCAA  
TTTTTATCCGATTGAGCTGATTTTGGTTTTAATCGATAGGTATTGAGTTGATCTTTAAAA  
TAAGATCAAGATCATGTCTGTATCTATCTTACTTTCGAAGTTACAGAACAAGTCCCGGTG  
CTTTTGGGACACCTT

--

>Btmar2.8.19\_gi-1092455329-gb-MAMS01000074\_1-:2265136-2266115

gi-1092455329-gb-MAMS01000074.1-:2265136-2266115 Bemisia tabaci isolate MEAM1 Scaffold27, whole genome shotgun sequence 980 bp

TACGTAGGGTGTCCCAAAAGTACCGGGACTGGTTCTGTAACCTCAAAGTAAGATAGATA  
CAGACATGATTTTGGTTTCATTTTAAAGATCAACTCAATACCTATCGATTAAAACCAAGA

TCAGCTCAATCGGATAAAAATTGACAGAGTTATGACAATTTGAAATTAGCGAGGAAAGTT  
TACCCCTACGGTTTTTAGGAAGATTTTCGCTTACCAGCATTCAAAAAGTTAATTTTCGT  
ATCCACTTTCCTCCGAATCTTCCATAACTTCCTTTTGCTTTTCAAAGTATCGTCCATCAA  
ACCGGATGCACTTTTTCATGCGCTCTTGCCACTTATCCAACATTGTTTTCTGAATTCTT  
CCTCTGGGATGGCGTTGAAAAAGTTTTGAATTGCATTCTGGATTTTCGGTCTTCGATTCTGA  
ATCTTCGTCCGCGAAGCTCCTTTTTAAGCGTAGGAAACATCCAAAAATCACATGGAGCCA  
AGTCAGGGCTGTAAGGGGGATGAGGGATTGTTTCAACTCCATTTTTACTCATAAATTCAC  
GTGTTAAGCTCGATGTGTGAGGCCGCGCTTGCTTGATGGAGTATCCACGAAGCTTTCAA  
GTCCGACCGTTTCCGGGAAATGTGCATTCTCAACTCCTTTAGCACTTTGCAATAATACGC  
ACTGTCAACTGTTGTGTTTGGTGGTACAAAATGTTGATAAATGACACCTCGAAAATGAAA  
AAAACACAATAAGCAGCACTTTATAGGCCGACTTTTCGATTTACGGCGATGAAGAATCTT  
CCTTAAAAACCGTAGGCGTAAACTTTCCTCGCTGATTTCAAATTGCCATAAAATGGTCAA  
TTTTTATCTGATTGAGCTGATCTTGGTTTTAATCGATAGGTATTGAGTTGATCTTTAAAA  
TGAGATCAAGATCATGTCTGTATCTATCTTACTTTTGAAGTTACAGAACAAGTCCCGGTG  
CTTTTGGGACACCTTATGTA

--

>Btmar2.8.20\_gi-1092428515-gb-MAMS01017023\_1-:3561551-3562530  
gi-1092428515-gb-MAMS01017023.1-:3561551-3562530 Bemisia tabaci isolate MEAM1 Scaffold809,  
whole genome shotgun sequence 980 bp

TACGTAGGGTGTCCCAAAAGTACCGGGACTGGTTCTGTAACCTCAAAAGTAAGATAGATA  
CAGACATGATTTTGGTCTCATTTTAAAGATCAACTCAATACCTATCGATTTAAACCAAGA  
TCAGCTCAATCGAATAAAAATTGACCGAGTTATGACAATTTGAAATTAGTGAGGAAAGTT  
TACCCCTACGGTTTTTAGGAAGATTTTCGCTTACCAGGATTCAAAAAGTTAATATTCGT  
ATCCACTTTCCTCCGAATCTTCCATAACTTCCTTTTGCTTTTCAAAGTACCGTCCATCAA  
ACCGGATGCACTTTTTCATGCGCTCTTGCCACTTATCCAACATTGTTTTCTGAATTCTT  
CCTCTGGGATGGAGTTGAAGAAGTTTTGAATTGCATTCTGGATTTTGTCTTCGATACGA  
ATCTTCGTCCGCGAAGCTCCTTTTTAAGCGCAGGAAACATCCAAAAATCACATGGAGCCA  
AGTCAGGGCTATAAGGGGGATGAGGGATTGTTTCAACTCCATTTTTACTCATAAATTCAC  
GTGTTAAGCTCGATGTGTGAGGCCGCGCATTGTCTTGATGGAGTATCCACGAAGCTTTCA

AGTCCGACCGTTTCCGGGAAATGTGCATTCTCAACTCCTTTAGTACTTTGCAATAATACG  
CACTGTCAACTGTTGTGTTTGATGGTACAAAATGTTGATAAATGACACCTCGAAAATAAA  
AAAACACAATAAGCATCACTTTATCGGCCGACTTTTCGATTTACGGCGATGAAGAATCTT  
CCTTAAAAACCGTAGGCGTAAACTTTCTCGCTGATTTCAAATTGCCATAACTCGGTCAA  
TTTTTATCCGATTGAGCTGATCTTGGTTTTAATCGATAGGTATTGAGTTGATCTTTAAAA  
TAAAATCAAGATCATGTCTGTATCTTTCTTACTTTTGAAGTTACAGAACAAGTCCCGGTG  
CTTTTGGGACACCTTATGTA

>Btmar2.8.21\_gi-1092428515-gb-MAMS01017023\_1-:3717094-3718073  
gi-1092428515-gb-MAMS01017023.1-:3717094-3718073 Bemisia tabaci isolate MEAM1 Scaffold809,  
whole genome shotgun sequence 980 bp

TACGTAGGGTGTCCCAAAGTACCGGGACTGGTTCTGTAACCTCAAAGTAAGATAGATA  
CAGACATGATTTTGGTCTCATTTTAAGGATCAACTCAATACCTATCGATTAACCAAGA  
TCAGCTCAATCGGATAAAAATTGACCGAGTTATGACAATTTGAAATTAGTGAGGAAAGTT  
TACCCCTACGGTTTTTAGGAAGATTTTCGCTTACCAGGATTCAAAAAGTTAATATTCGT  
ATCCACTTTCCTCCGAATCTTCCATAACTTCCTTTTGCTTTTCAAAGTACCGTCCATCAA  
ACCGGATGCACTTTTTCATGCGCTCTTGCCACTTATCCAACATTGTTTTCTGAATTCTT  
CCTCTGGGATGGCGTTGAAAAAGTTTTGAATTGCATTCTGGATTTTCGGTCTTCGATTCTGA  
ATCTTCGTCCACGAAGCTCCTTTTTAAGTGTAGGAAACATCCAAAATCACATGGAGCCA  
AGTCAGGGCTGTAAGGGGGATGAGGGATTGTTTCAACTCCATTTTACTCATAAATTCAC  
GTGTTAAGCTCGATGTGTGAGGCCGCGCTTGTCTTGATGGAGTATCCACGAAGCTTTCAA  
GTCCGACCGTTTCCGGGAAATGTGCATTCTCAACTCCTTTAGCACTTTGCAATAATACGC  
ACTGTCAACTGTTGTGTTTGGTGGTACAAAATGTTGATAAATGACACCTCGAAAATGAAA  
AAAACACAATAAGCATCACTTTATAGGCCGACTTTTCGATTTACGGCGATGAAGAATCTT  
CCTTAAAAACCGTAGGCGTAAACTTTCTCGCTGATTTCAAATTGCCATAACTTGGTCAA  
TTTTTATCCGATTGAGCTGATCTTGGTTTTAATCGATAGGTATTGAGTTGATCTTTAAAA  
TGAGATCAAGATCATGTCTGTATCCATCTTACTTTTGAAGTTACAGAACAAGTCCCGGTG  
CTTTTGGGACACCTTTTGTGTA

--

>Btmar2.8.22\_gi-1092435004-gb-MAMS01010534\_1-:9600162-9601141  
gi-1092435004-gb-MAMS01010534.1-:9600162-9601141 Bemisia tabaci isolate MEAM1 Scaffold52,  
whole genome shotgun sequence 980 bp

TACGTAGGGTGTCCCAAAAGTACCGGGACTGGTTCTGTAACCTCAAAGTAAGATAGATA  
CAGACATGATTTTGGTCTCATTTTAAAGATCAACTCAATACCTATCGATTAAAACCAAGA  
TCAGCTCAATCGAATAAAAATTGACCGAGTTATGACAATTTGAAATTAGTGAGGAAAGTT  
TACCCCTACGGTTTTTAGGAAGATTTTCGCTTACCAGGATTCAAAAAGTTAATATTCGT  
ATCCACTTTCCTCCGAATCTTCCATAACTTCCTTTTGCTTTTCAAAGTACCGTCCATCAA  
ACCGGATGCACTTTTTCATGCGCTCTTGCCACTTATCCAACATTGTTTTCTGAATTCTT  
CCTCTGGGATGGAGTTGAAGAAGTTTTGAATTGCATTCTGGATTTCGGTCTTCGATACGA  
ATCTTCGTCCGCGAAGCTCCTTTTAAAGCGTAGGAAACATCCAAAAATCACATGGAGCCA  
AGTCAGGGCTATAAGGGGGATGAGGGATTGTTCAACTCCATTTTACTCATAAATTCAC  
GTGTTAAGCTCGATGTGTGAGGCCGCGCATTGTCTTGATGGAGTATCCACGAAGCTTTCA  
AGTCCGACCGTTTCCGGGAAATGTGCATTCTCAACTCCTTTAGTACTTTGCAATAATACG  
CACTGTCAACTGTTGTGTTTGATGGTACAAAATGTTGATAAATGACACCTCGAAAATAAA  
AAAACACAATAAGCATCACTTTATCGGCCGACTTTTCGATTTACGGCGATGAAGAATCTT  
CCTTAAAAACCGTAGGCGTAAACTTTCCTCGCTGATTTCAAATTGCCATAACTCGGTCAA  
TTTTTATCCGATTGAGCTGATCTTGGTTTTAATCGATAGGTATTGAGTTGATCTTTAAAA  
TGAAATCAAGATCATGTCTGTATCTATCTTACTTTGAAGTTACAGAACAAGTCCCGGTG  
CTTTTGGGACACCTTATGTA

>Btmar2.8.23\_gi-1092435004-gb-MAMS01010534\_1-:6926225-6927204  
gi-1092435004-gb-MAMS01010534.1-:6926225-6927204 Bemisia tabaci isolate MEAM1 Scaffold52,  
whole genome shotgun sequence 980 bp

TACGTAGGGTGTCCCAAAAGTACCGGGACTGGTTCTGTAACCTCAAAGTAAGATAGATA  
CAGACATGATTTTGGTCTCATTTTAAAGATCAACTTAATACCTATCGATTAAAACCAAGA  
TCAGCTCAATCGAATAAAAATTGACCGAGTTATGACAATTTAAAATTAGTGAGGAAAGTT  
TACCCCTACGGTTTTTAGGAAGATTTTCGCTTACCAGGATTCAAAAAGTTAATATTCGT  
ATCCACTTTCCTCCGAATCTTCCATAACTTCCTTTTGCTTTTCAAAGTACCGTCCATCAA  
ACCGGATGCACTTTTTCATGCGCTCTTGCCACTTATCCAACATTGTTTTCTGAATTCTT  
CCTCTGGGATGGAGTTGAAGAAGTTTTGAATTGCATTCTGGATTTCGGTCTTCGATACGA

ATCTTCGTCCGCGAGGCTCCTTTTTAAGCGTGGGAAACATCCAAAAATCACATGGAGCCA  
AGTCAGCGCTATAAGGGGGATGAGGGATTGTTCAACTCCATTTTTACTCATAAATTCAC  
GTGTTAAGCTCGATGTGTGAGGCCGCGCATTGTCTTGATGAAGTATCCACGAAGCTTTCA  
AGTCCGACCGTTTCCGGGAAATGTGCATTCTCAACTCCTTTAATACTTTGCAATAATACG  
CACTGTCAACTGTTGTGTTTGATGGTACAAAATGTTGATAAATGACACCTCGAAAATAAA  
AAAACACAATAAGCATCACTTTTTCGGCCGACTTTTCGATTACGGCGATGAAGAATCTT  
CCTTAAAAACCGTAGGCGTAAACTTTCTCGCTGATTTCAAATTGCCATAACTCGGTCAA  
TTCTTATCCGATTGAGCTGATCTTGTTTAAATCGATAGGTATTGAGTTGATCTCTAAAA  
TGAGATCAAGATCATGTCTGTATCTATCTTACTTTCGAAGTTACAGAACAAGTCCCGGTG  
CTTTGGGACACCTTATGTA

--

>Btmar2.8.24\_gi-1092449997-gb-MAMS01002403\_1-:21055-22037  
gi-1092449997-gb-MAMS01002403.1-:21055-22037 Bemisia tabaci isolate MEAM1 Scaffold1805, whole  
genome shotgun sequence 983 bp

TACGTAGGGTGTCCCAAAAGTACCGGGACTGGTTCTGTAACCTCAAAGTAAGATAGATA  
CAGACATGATTTTGGTCTCATTTTAAAGATCAACTCAATACCTATCGATTTAAACCAAGA  
TCAGCTCAATCGGATAAAAATTGACCAAAGTTATGGCAATTTGTAATCAGCGAGGAAAGT  
TTACCCCTACGGTTTTTAGGAAGATTTTCGCTTACCAGGATTCAAAAAGTTAATATTCG  
TATCCACTTTCCTCCGAATCTTCCATAACTTCATTCTGCTTTCAAAGTACCCTCCATCA  
AACCGGATGCACTTTTTCATGCGCTCTTGCCACTTATCCAACATTGTTTTCTGAATTCT  
TCCTCTGGGATGGCGTTGAAAAAGTTTTGAATTGCATTCTGGATTTCGGTCTTCGATTCTG  
AATGTTTCGTCCGCGAAGCTCCTTTTTAAGCGTAGGAAACATCCAAAAATCACATGGAGCC  
AAGTCAGGGCTATAAGGGGGATGAGGGATTGTTCAACTCCATTTTTACTCATGAATTCA  
CGTGTTAAGCTCGATGTGTGAGGCCGCGCATTGTCTTGATGGAGTATCCACGAAGCTTTC  
AAGTCCGACCGTTTCCGGGAAATGTGCATCCTCAACTCCTTTAGCACTTTGCAATAATAC  
GCACTGTCAACTGTTGTGTTTGGTGGTACAAAATGTTGATAAATGACACCTCGAAAATAA  
AAAAACACAATAAGCATCACTTTATAGGCCGACTTTTCGATTACGGCGATGAAGAATC  
TTCCTTAAAAACCGTAGGGGTAAACTTTCTCGCTGATTACAAATTGCCATAACTTTGGT  
CAATTTTATCCGATTGAGCTGATCTTGTTTAAATCGATAGGTATTGAGTTGATCTTTA

AAATAAGATCAAGATCATGTCTGTATCTATCTTACTTTCGAAGTTAGAGAACCAGTCCCG  
GTACTTTTGGGACACCTTATGTA

--

>Btmar2.8.25\_gi-1092450877-gb-MAMS01001951\_1-:7676830-7677809  
gi-1092450877-gb-MAMS01001951.1-:7676830-7677809 Bemisia tabaci isolate MEAM1 Scaffold16276,  
whole genome shotgun sequence 980 bp

TACGTAGGGTGTCCCAAAAGTACCGGGACTGGTTCTGTAACCTCCAAAGTAAGATAGATA  
CAGACATGATTTTGGTCTCATTTTGGAGGATCAACTCAATACCCATCGATTAACCAAGA  
TCAACTCAATCGGATAAAAATTGACCGAGTTATGATAATTTGAAATTAGTGAGGAAAGTT  
CACCCCTACGGTTTTTAGGAAGATTTTTCGCTTACCAGGATTCAAAAAGTTAATATTCGT  
ATCCACTTTCCTCCGAATCTTCCATAACTTCCTTTTGCTTTTCAAAGTACCGTCCATCAA  
ACCGGATGCACTTTTTCATGCGCTCTTGCCACTTATCCAACATTGTTTTCTGAATTCTT  
CCTCTGGGATGGAGTTGAAGAAGTTTTGAATTGCATTCTGGATTTTGTCTTCGATACGA  
ATCTTCGTCCGCGAAGCTCCTTTTAAGCGTAGGAAACATCCAAAAATCACATGGAGCCA  
AGTCAGGGCTATAAGGGGGATGAGGGATTGTTCAACTCCATTTTACTCATAAATTCAC  
GTGTTAAGCTCGATGTGTGAGGCCGCGCATTGTCTTGATGGAGTATCCACGAAGCTTTCA  
AGTCCGACCGTTTCCGGGAAATGTGCATTCTCAACTCCTTTAGTACTTTGCAATAATACG  
CACTGTCAACTGTTGTGTTTGATGGTACAAAATGTTGATAAATGACACCTCGAAAATAAA  
AAAACACAATAAGCATCACTTTATCGTCCGACTTTTTCGATTACAGCGATGAAGAATCTT  
CCTTAAAAATCGTAGGCGTAACTTTCCTCGCTGATTTCAAATTGCCATAACTCGGTCAA  
TTTTTATCCGATTGAGTTGATCTTGGTTTTAATCGATGGGTATTGAGTTGATCTTTAAAA  
TGAGATCAAGATCATGTCTGTATCTATCTTACTTTCGAAGTTACAGAACAAGTCCCGGTG  
CTTTTGGGACACCTTATGTA

--

>Btmar2.8.26\_gi-1092455496-gb-MAMS01000029\_1-:6903036-6904018  
gi-1092455496-gb-MAMS01000029.1-:6903036-6904018 Bemisia tabaci isolate MEAM1 Scaffold165,  
whole genome shotgun sequence 983 bp

TACGTAGGGTGTCCCAAAAGTACCGGGACTGGTTCTGTAACCTCCAAAGTAAGATAGATG

CAGACATGATTTTGGTCTCATTTTAAAGATCAACTCAATACCTATCGATTAAAACCAAGA  
TCAGCTCAATCGAATAAAAATTGACCGAGTTATGACAATTGAAATTAGTGAGGAAAGTT  
TACCCCTACGGTTTTTAGGAAGATTTTCGCTTACCAGGATTCAAAAAGTTAATATCCGT  
ATCCACTTTCCTCCGAATCTTCCATAACTTCCTTTTGCTTTTCAAAGTACCGTCCATCAA  
ACCGGATGCACTTTTTTCATGCGCTCTTGCCACTTATCCAACATTGTTTTCTGAATTCTT  
CCTCTGGGATGGAGTTGAAGAAGTTTTGAATTGCATTCTGGATTTTTGTCTTCGATACGA  
ATCTTCGTCCGCGAAGCTCCTTTTAAAGCGCAGGAAACATCCAAAAATCACATGGAGCCA  
AGTCAGGGCTATAAGGGGGATGAGGGATTGTTTCAACTCCATTTTACTCATAAATTCAC  
GTGTTAAGCTCGATGTGTGAGGCCGCGCATTGTCTTGATGGAGTATCCACGAAGCTTTC  
AGTCCGACCGTTTCCGGGAAATGTGCATTCTCAACTCCTTTATATAGTACTTTGCAATAA  
TACGCACTGTCAACTGTTGTGTTTGATGGTACAAAATGTTGATAAATGACACCTCGAAAA  
TAAAAAACACAATAAGCATCACTTTATCGGCCGACTTTTCGATTACGGCGATGAAGAA  
TCTTCCTTAAAAACCGTAGGCGTAACTTTCCTCGCTGATTTTAAATTGCCATAACTCGG  
TCAATTTTATCCGATTGAGCTGATCTTGGTTTTAATCGATAGGTATTGAGTTGATCTTT  
AAAATGAAATCAAGATCATGTCTGTATCTATCTTATTTTCGAAGTTACAGAACAAGTCCC  
GGTGCTTTTGGGACACCTTATGT

>Btmar2.8.27\_gi-1092455496-gb-MAMS01000029\_1-:5253501-5254481  
gi-1092455496-gb-MAMS01000029.1-:5253501-5254481 Bemisia tabaci isolate MEAM1 Scaffold165,  
whole genome shotgun sequence 981 bp

TACGTAGGGTGTCCCAAAGTACCGGGACTGGTTCTGTAACCTCAAAGTAAGATAGATG  
CAGACATGATTTTGGTCTCATTTTAAAGATCAACTCAATACCTATCGATTAAAACCAAGA  
TCAGCTCAATCGAATAAAAATTGACCGAGTTATGACAATTGAAATTAGTGAGGAAAGTTT  
ACCCCTACGGTTTTTAGGAAGATTTTCGCTTACCAGCATTCAAAAAGTTAATATTCGTA  
TCCACTTTCCTCCGAATCTTCCATAACTTCCTTTTGCTTTTCAAAGTACCGTCCATCAAA  
CCGGATGCACTTTTTTCATGCGCTCTTGCCACTTATCCAACGTTGTTTTCTGAATTCCTC  
CTCTGGGATGGAGTTGAAGAAGTATTTTGAATTGCATTCTGGATTCGATCTTCGATACG  
AATCTTCGTCCGCGAAGCTCCTTTTAAATCGTAGGAAACATCCAAAAATCACATGGAGCC  
AAGTCAGGGCTATAAGGGGGATGAGGAATTGTTTCAACTCCATTTTACTCATAAATTCA  
CGTGTTAAGCTCGATGTGTGAGGCCGCGCATTGTCTTGATGGAATATCCACGAAGCTTTC  
AAGTCCGACCGTTTCCGGGAAATGTGCATTCTCAACTCCTTTAGTACTTTGCAATAATAC

GCACTGTCAACTGTTGTGTTTGATGGTACAAAATGTTGATAAATGACACCTCGAAAATAA  
AAAAACACAATAAGCTTCACTTTATCGGCCGACTTTTCGATTTACGGCGATGAAGAATCT  
TCCTTAAAAACCGTAGGCGTAAACTTTCTCGCTGATTTCAAATTGCCATGAATCGGTCA  
ATTTTTATCCGATTGAGCTGATCTTGGTTTTAATCGATAGGTATTGAGTTGATCTTTAA  
ATGAAATCAAGATCATGTCTGTATCTATCTTACTTTCGAAGTTACAGAACAAGTCCCGGT  
GCTTTTGGGACACCTTACGTA

>Btmar2.8.28\_gi-1092455496-gb-MAMS01000029\_1-:4934007-4934988  
gi-1092455496-gb-MAMS01000029.1-:4934007-4934988 Bemisia tabaci isolate MEAM1 Scaffold165,  
whole genome shotgun sequence 982 bp

TACGTAGGGTGTCCCAAAAGTACCGGGACTGGTTCTGTAACCTCAAAAGTAAGATAGATG  
CAGACATGATTTTGGTCTCATTTTAAAGATCAACCAATACCTATCGATTTAAACCAAGA  
TCAGCTCAATGGAATAAAAATTGACCGAGTTATGACAATTTGAAATTAGTGAGGAAAGTT  
TACCCCTACGGTTTTTTAGGAAGATTTTTCGCTTACCAGCATTCAAAAAGTTAATATTCGT  
ATCCACTTTTCTCCGAATCTTCCATAACTTCTTTTGCTTTTCAAAGTACCGTCCATCAA  
AGCGGATGCACTTTTTCATGCGCTCTTGCCACTTATCCAACATTGTTTTCTGAATTCTT  
CCTCTGGGATGGAGTTGAAGAAGTATTTTGAATTGCATTCTGGATTTCGGTCTTCGATAC  
GAATCTTCGTCCGCGAAGCTCCTTTTAAACCGTAGGAAACATCCAAAAATCACATGGAGC  
CAAGTCAGGGCTATAAGGAGGATGAGGGATTGTTCAACTCCATTTTACTCATAAATTC  
ACGTGTTAAGCTCGATGTGTGAGGCCGCGCTTGTCTTGATGGAGTATCCACGAAGCTTTC  
AAGTCCGACCGTTTCCGGGAAATGTGCATTCTCAACTCCTTTAGCACTTTGCAATAATAC  
GCACTGTCAACTGTTGTGTTTGGTGGTACAAAATGTTGATAAATGACACCTCGAAAATGA  
AAAAACACAATAAGCATCACTTTATAGGCTGACTTTTCGATTTACGGCGATGAAGAATC  
TTCCTTAAAAACCGTAGGCGTAAACTTTCTCGCTGATTTCAAATTGCCATAACTCGGTC  
AATTTTTATCCGATTGAGCTGATCTTGGTTTTAATCGATAGGTATTGAGTTGATCTTTAA  
AATGAAATCAAGATCATGTCTGTATCTATCTTACTTTCGAAGTTACAGAACAAGTCCCGG  
TGCTTTTGGGGCACCTTACGTA

>Btmar2.8.29\_gi-1092455496-gb-MAMS01000029\_1-:6848405-6849388  
gi-1092455496-gb-MAMS01000029.1-:6848405-6849388 Bemisia tabaci isolate MEAM1 Scaffold165,  
whole genome shotgun sequence 984 bp

TACGTAGGGTGTCCCAAAAGTACCGGGAATGGTTCTGTAACCTCAAAAGTAAGATAGATA



CAGACATGATTTTGGTCTCATTTTAAAGATCAACTCAATACCTATCGATTAAAACCAAGA  
TCAGCTCAATCGAATAAAAAATTGACCGAGTTATGACAATTTGAAATTAGTGAGGAAAGTT  
TACCCCTACGGTTTTTAGGAAGATTTTCGCTTACCAGGATTCCAAAAGTTAATATTCGT  
ATCCACTTTCCTTCGAATCTTCCATAATTTCTTTTGCTATTCAAAGTACCGTCCATCAA  
ACCGGATGCACTTTTTCATGCGCTCTGCCACTTATCCAACATTGTTTTCTGAATTCTT  
CCTCTGGGATGGAGTTGAAGAAGTTTTGAAATGCATTCTGGATTTTCGGTCTTCGATACGA  
ATCTTCGTCCGCGAAGCTCCTTTTAAAGCGTGGGAAACATCCAAAAATCACATGGAGCCA  
AGTCAGCGCTATTAGGGGGATGAGGGATTGTTTCAACTCCATTTTACTCATAAATTCAC  
GTGTTAAGCTCGATGTGTGAGGCCGCGCATTGTCTTGATGGAGTATCCACGAAGCCGACA  
AGTCCGACCGTTTCCGGGAAATGTGCATTCTCAAGTCCTTTAGTACTTTGCAATAATACG  
CACTGTCAACTGTTGTGTTTGATGGTACAAAATGTTGATAAATGACACCTCGAAAATAAA  
AAAACACAATAAGCATCACTTTATCGGCCGACTTTTGATTTACGGCGATGAAGAATCTTC  
CTTAAAAACCGTAGGCGTAACTTTCCTCGCTGATTTCAAATTGTCATAACTCGGTCAAT  
TTTTATCCGATTGAGCTGATCTTGGTTTTAATCGATAGGTATTGAGTTGATCTTCAAAT  
GAAATCAAGATCATGTCTGTATCGTATCTATCTTACTTTCGAAGTTACAGAAGAAGTCCC  
GGTGCTTTTGGGACACCTTATGTA

>Btmar2.8.30\_gi-1092455496-gb-MAMS01000029\_1-:6697867-6698595  
gi-1092455496-gb-MAMS01000029.1-:6697867-6698595 Bemisia tabaci isolate MEAM1 Scaffold165,  
whole genome shotgun sequence 729 bp

TACGTAGGGTGTCCCAAAGTACCGGGACTGGTTCTGTAACCTCAAATTAAGATAGATA  
CAGACATGATTTTGGTCTCATTTTAAAGATCAACTCAATACCTATCGATTAAAACCAAGA  
TCAGCTCAATCGAATAAAAAATTGACCGAGTTATGACAATTTGAAATTAGTGAGGAAAGTT  
TACCCCTACGGTTTTTAGGAAGATTTTCGCTTACCAGGATTTAAAAAGTTAATATTCGT  
ATCCACTTTCCTCCGAATCTTCCATAACTTCTTTTGCTTTTCAAAGTACCGTCCATCAA  
ACCGGATGCACTTTTTCATGCGCTCTGCCACTTATCCAACATTGTTTTCTGAATTATT  
CCTCTGGGATGGAGTTGAAGAAGTTTTGAATTGCATTCTGGATTTTCGGTCTTCGATACGA  
ATCTTCGTCCGCGAAGCTCCTTTTAAAGCGTGGGAAACATCCAAAAATCACATGGAGCCA  
AGTCAGCGCTATAAGGGGGATGAGGGATTGTTTCAACTCCATTTTACTCATAAATTCAC  
GTGTTAAGCTCGATGTGTGAGGCTGCGCATTGTTTTGATGGAGTATCCACGGAGCTTTCA  
AGTCCGACCGTTTCCGGGAAATGTGCATTCTCAACTCCTTTACTACTTTGCAATAATACG

CACTGTCAACTGTTGTGTTTGATGGTACAAAATGTTGATAAATGACACCTCGAAAATAAA  
AAAACACAA

--

>Btmar2.8.31\_gi-1092426089-gb-MAMS01019449\_1-:226601-227552  
gi-1092426089-gb-MAMS01019449.1-:226601-227552 Bemisia tabaci isolate MEAM1 Scaffold923, whole  
genome shotgun sequence 952 bp

GGTTCTGTAACCTCAAAAGTAAGATAGATACAGACATGATTTTGGTCTCATTTTAAAGAT  
CAACTCAATACCTATCGATTAATCCAGATCAGCTCAATCGAATAAAAATTGACCGAGT  
TATGACAATTTGAAATTAGTGAGAAAAGTTTACCCCTACGGTTTTTAGAAAGATTTTTCG  
CTTACCAGCATTCAAAAAGTTAATATTCGTATCCACTTCTCCGAATCTTCCATAACTT  
CCTTTTGCTTTTCAAAGTACCGTCCATCAAACCGGATGCACTTTTTCATGCACTCTTGCC  
ACTTATCCAACATTGTTTTCTGAATTCTTCTCTGGGATGGAGTTGAAGAAGTTTTGAA  
TTGCATTCTGGATTCGGTCTTCGATACGAATCTTCGTCCGCGAATCTCCTTTTAAAGCG  
TAGGAAACATCCAAAAATCACATGGAGCCAAGTCAGGGCTATAAGGGGGATGAGGGATTG  
TTTCAACTCCATTTTACTCATAAATTCACGTGTTAAGCTCGATGTGTGAGGCCGCGCAG  
TGTCTTGATGGAGTATCCACGAAGCTTCAAGTCCGACCGTTTCCGGGAAATGTGCATTC  
TCAACTCCTTAGTACTTTGCAATAATACGCACTGTCAACTGTTGTGTTTGATGGTACAA  
AATGTTGATAAATGACACCTCGAAAATAAAAAACACAATATAAGCATCACTTTATCGGT  
CGACTTTTCGATTTACGGCGATGAAGAATCTTCTTAAAAACCGTAGGCGTAACTTTCC  
TCGCTGATTTCAAATTGCCATAACTCGGTCAATTTTATCCGATTGAGCTGATCTTGTT  
TTAATCGATAGGTATTGAGTTGATCTTTAAATGAGTTCAAGATCATGTCTGTATCTATC  
TTACTTTCGAAGTTACAGAACAAGTCCCGGTGCTTTTGGGACACCTTATGTA

>Btmar2.8.32\_gi-1092426089-gb-MAMS01019449\_1-:597388-598340  
gi-1092426089-gb-MAMS01019449.1-:597388-598340 Bemisia tabaci isolate MEAM1 Scaffold923, whole  
genome shotgun sequence 953 bp

TACGTAGGGTGTCCAAAAGTACCGGGACTGGTTCTGTAACCTCAAAAGTAAGATAGATG  
CAGACATGATTTTGGTCTCATTTTAAAGATAAACTCAATACCTATCGATTAACCAAGA  
TCAGCTCAATCAAATGAAAATTGACCGAGTTATGACAATTTGAAATTAGTGAGGAAAGTT  
TACCCCTACGGTTTTTAAGAAGATTTTCGCTTACCAGGATTCAAAAAGTAAATATTCGT

ATCCACTTTCCTCCGAATCTTCCATAACTTCCTTTTGCTTTTCAAAGTACCGTCCATCAA  
ACCGGATGCACTTTTTTCATGCGCTCTTGCCACTTATCCAACATTGTTTTCTGAATTCTT  
CCTCTGGGATGGAGTTGAAAAAGTTTTGAATTGCATTCTGGATTTCGGTCTTCGATACGA  
ATCTTCGTCCGCGAAGCTCCTTTTTAAGCGTAGGAAACATCCAAAAATCACATGGAGCCA  
AGTCAGGGCTATAAGGGGGATGAGGGATTGTTCAACTCCATTTTTACTCATAAATTCAC  
GTGTTAAGCTCGATGTGTGAGGCCGCGCATTGTCTTGATGGAGTATCCACGAAGCTTTCA  
AGTCCGACCGTTTCCGGGAAATGTGCATTCTCAACTCCTTTAGTACTTTGCAATAATACG  
CACTGTCAATTGTTGTGTTTGATGGTACAAAATGTTGATAAATGACACCTCGAAAATAAA  
AAACACAATAAACATCACTTTATCGGCCGACTTTTCGATTTACGGCGATGAAGAATCTT  
CCTTAAAAACCGTAGGCGTAAACTTTCTCGCTGATTTCAAATTGCCATAACTCGGTCAA  
TTTTTATCCGATTGAGCTGATCTTGGTTTTAATCGATGGGTATTGAGTTGATCTTTAAAA  
TGAGATCAAGATCATGTCTGTATCTATCTTACGTTTGAAGTTGCGGAACAAGT

--

>Btmar2.8.33\_gi-1092450672-gb-MAMS01002091\_1-:4868245-4869223  
gi-1092450672-gb-MAMS01002091.1-:4868245-4869223 Bemisia tabaci isolate MEAM1 Scaffold1685,  
whole genome shotgun sequence 979 bp

TACGTAGGGTGTCCCAAAAATACCGGGACTGGTTCTGTAACCTCAAAAGTAAGATAGATG  
CAGACATGATTTTGGTCTCATTTTAAAGATCAACTCAAACCTATCGATTAAAACCAAGAT  
CAGCTCAATCGAATAAAAATTGACCGAGTTATGACAATTTGAAATTAGTGAGGAAAGTTT  
ACCCCTACGGTTTTTAGGAAGATTTTTCGCTTACCAGGATTCAAAAAGTTAATATTCGTA  
TCCACTTTCCTTGAATCTTCCATAATTTCTTTTGCTTTTCAAAGTACCGTCCATCAAA  
CCGGATGCACTTTTTTCATGCGCTCTTGCCACTTATCCAACATTGTTTTCTGAATTCTTC  
CTCTGGGATGGAGTTGAAGAAGTTTTGAATTGCATTCTGGATTTCGGTCTTCGATACGAA  
TCTTCGTACGCGAAGCTCCTTTTTAAGCGTGGGAAACATCCAAAAATCACATGGAGCCAA  
GTCAGCGCTATTAGGGGGATGAGGGATTGTTTCAACTCCATTTTTACTCATAAATTCACG  
TGTTAAGCTCGATGTGTGAGGCCGCGCATTGTCTTGATGGAGTATCCACGAAGCTTTCAA  
GTCCGACCGTTTCCGGGAAATGTGCATTCTCAACTCCTTTAGTACTTTGCAATAATACGC  
ACTGTCAACTGTTGTGTTTGATGGTACAAAATGTTGATAAATGACACCTCGAAAATAAAA

AAACACAATAAGCATCATTTTATCGGCCGACTTTTCGATTTACGGCGATGAAGAATCTTC  
CTTAAAAACCGTAGGCGTAACTTTCTCGCTGATTTCAAATTGCCATAACTCGGTCAAT  
TTTTATCCGATTGAGCTGATCTTGGTTTTAATCGATAGGTATTGAGTTGATCTTTAAAAT  
GAAATCAAGATCATGTCTGTATCTATCTTACTTTCGAAGTTACAGAACAAGTCCCGGTGC  
TTTTGGGACACCTTATGTA

>Btmar2.8.34\_gi-1092450672-gb-MAMS01002091\_1-:4353685-4354654  
gi-1092450672-gb-MAMS01002091.1-:4353685-4354654 Bemisia tabaci isolate MEAM1 Scaffold1685,  
whole genome shotgun sequence 970 bp

TACGTCGGGTGTCCCAAAGTACCGGGACTGGTTCTGTAACCTCAAAAGTAAGATAGATA  
CAGACATGATTTTGGTCTCATTTTAAAGATCAACTCAATACCTATCGATTTAAACCAAGA  
TCAGCTCAATCGAATAAAAATTGACCGAGTTATGACAATTTGAAATTAGTGAGGAAAGTT  
TACCCCTACGGTTTTTAGGAATATTTTCGCTTACCAGGATTCAAAAAGTTAATATTCGT  
ATCCACTTTCCTCCGAATCTTCCATAACTTCCTTTTGCTTTTCAAAGTACCGTCCATCAA  
ACCGGATGCACTTTTTCATGCGCTCTTCCACTTATCCAACATTGTTTTCTGAATTCTT  
CCTCTGGGATGGCGTTGAAAAAGTTTTGATTTGCGTCTTCGATTGGAATCTTCGTCCGCG  
AAGCTTCTTTTAAAGCGTAGGAAACATCCAAAAATCACATGGAGCCAAGTCAGGGCTGTA  
AGGGGGATGAGGGATTGTTTCAACTCCATTTTACTCATAAATTCACGTGTTAAGCTCGA  
TGTGTGAGGCCGCGCTTGCTTGATGGAGTATCCACGAAGCTTTCAGTCCGTTTCGTTTC  
CGGGAAATGTGCATTCTCAACTCCTTTAGCACTTTGCAATAATACGCACTCTCAACTGTT  
GTGTTTGGTGGTACAGAATGTTGATACTTAAATGACACCTCGAAAATAAAATAACACAAT  
AAGCATCACTTTATAGGCCGACTTTTCAATTTACGGCGATGAAGAACTTCCTTAAAAAC  
CGTAGGCGTAACTTTCTCGCTGATTTAAAATTGCCATAACTCGGTCAATTTTTATTCTG  
ATTGAGCTGATCTTGGTTTTAATCGATAGGTATTGAGTTGATCTCTAAAATGAGATCAAG  
ATCATGTCTGTATCTATCTTACTTTCGACGTTACAGAACAAGTCCCGGTGCTTTTGGGAC  
ACCTTATGTA

>Btmar2.8.35\_gi-1092450672-gb-MAMS01002091\_1-:4630789-4631662  
gi-1092450672-gb-MAMS01002091.1-:4630789-4631662 Bemisia tabaci isolate MEAM1 Scaffold1685,  
whole genome shotgun sequence 874 bp

GATTAACCAAGATCAGCTCAATCGAATAAAAATTGACCGAGTTATGACAATTTGAAAT  
TAGTGAGGAAAGTTTACCCCTACGGTTTTTAGGAAGATTTTCGCTTACCAGGATTCAAA

AAGTTAATATTTCGTATCCACTTTCCTCCGAATCTTCCATAACTTCCTTTTGCTTTTCAA  
GTACCGTCCATCAAACCGGATGCACTTTTTTCATGCGTTCTTGCCACTTATCCAACATTGT  
TTTCTGAATTCTTCTCTGGGATGGCGTTGAAAAAGTTTTGAATTGCATTCTGGATTTC  
GGTCTTCGATACGAATCTTCGTCCGCTAAGCTCCTTTTAAAGCGTAGGAAACATCCAAAA  
ATCACATGGAGCCAAGTCAGGGCTATAAGGGGGATGTGGGATTGTTTCAACTCCATTTTT  
ACTCATAAATTCACGTGTTAAGCTCGATGTGTGAGGCCGCGCATTGTCTTGATGGAGTAT  
CCACGAAGCTTTCAAGTCCGACCGTTTCCGGGAAATGTGCATTCTCAACTCCTTTAGCAC  
TTTGCAATAATACGCACTGTCAACTGTTGTGTTTGATGGTACAAAATGTTGATAAATGAC  
ACCTCGAAAATAAAAAAACACAATTAGCATCACTTTATGGGCCGACTTTTCGATTACGG  
CGATGAAGAATCTTCCTTAAAACTGTAGGCGTAACTTTCCTCGCTGATTTCAAATTGC  
CATAACTTGGTCAATTTTTATCCGATTGAGCTGATCTTGGTTTTAATTGATAGATATTGA  
GTTGATCTTTAAATGAAATCAAGATCATGTCTGTATCTATCTTACTTTCGAAGTTACAG  
AACAAGTCCCGGTGCTTTTGGGACACCTTATGTA

--

>Btmar2.8.36\_gi-1092450672-gb-MAMS01002091\_1-:4090219-4090947  
gi-1092450672-gb-MAMS01002091.1-:4090219-4090947 Bemisia tabaci isolate MEAM1 Scaffold1685,  
whole genome shotgun sequence 729 bp

TACGTAGGGTGTCCCAAAGTACCGGGACTGGTTCTGTAACCTCAAATTAAGATAGATA  
CAGACATGATTTTGGTCTCATTTTAAAGATCAACTCAATACCTATCGATTAACCAAGA  
TCAGCTCAATCGAATAAAAATTGACCGAGTTATGACAATTTGAAATTAGTGAGGAAAGTT  
TACCCCTACGTTTTTAGGAAGATTTTCGCTTACCAGGATTTAAAAAGTTAATATTCGT  
ATCCACTTTCCTCCGAATCTTCCATAACTTCCTTTTGCTTTTCAAAGTACCGTCCATCAA  
ACCGGATGCACTTTTTTCATGCGCTCTTGCCACTTATCCAACATTGTATTCCTGAATTATT  
CCTCTGGGATGGAGTTGAAGAAGTTTTGAATTGCATTCTGGATTTCGGTCTTCGATACGA  
ATCTTCGTCCGCGAAGCTCCTTTTAAAGCGTGGGAAACATCCAAAAATCACATGGAGCCA  
AGTCAGCGCTATAAGGGGGATGAGGGATTGTTTCAACTCCATTTTACTCATAAATTCAC  
GTGTTAAGCTCGATGTGTGAGGCTGCGCATTGTTTTGATGGAGTATCCACGGAGCTTTCA  
AGTCCGACGGTTTCCGGGAAATGTGCATTCTCAACTCCTTTACTACTTTGCAATAATACG  
CACTGTCAACTGTTGTGTTTGATGGTACAAAATGTTGATAAATGACACCTCGAAAATAAA  
AAAACACAA

--

>Btmar2.8.37\_gi-1092450672-gb-MAMS01002091\_1-:1012678-1013282  
gi-1092450672-gb-MAMS01002091.1-:1012678-1013282 Bemisia tabaci isolate MEAM1 Scaffold1685,  
whole genome shotgun sequence 605 bp

TACATAGGCTGTCCCAAAGTACCCGGACTGGTTCTGTAAC TTCAAACCAATTGATA  
CAGACATGATCTTGGTTTCATTTTAAAGATCAACTCAATATCTATCGATTAAGACCAAGA  
TCAGCGCAATCGCATACAAATTGACGGAGTTATGGTAATTTAAAACCAGCGAGTAAAGTT  
TACCCCTACGGTCATAAGGAAGATTTTTCGCTGACCAGGATTCAAAAAGTTAATCTTCCT  
TTCCGCTTTCCTCCATAAATCTTCCATGACTTGCTTTTGCTTTTCAATGTACCGTCCATT  
AAATCGGATGCACTTACTCATGTGCTCTTGCCACTTCTCTAACTTTGTTTTCTGAATTC  
TTCCCTAGGATAAAGTTGAAAAAGTTCTGAGCTGCATTCTGCATTTCCGGTCCTCGATT  
AAATTTTAGTCCGCGAAGCTCCTTCTTAAGCGCAGGAAACATCCAAAAATCACAAGGAGC  
CAAGTCAGGGCTATAAGGAGGATGAAGGATTGTTTCAACTTCATTTTTACTCATCAATTC  
ACGTGTAAAGTTCGAGTTGCGAGGCCGCGGTTGTCTTGATGGAGCATCCACGAAGCTTT  
CAAGT

--

>Btmar2.8.38\_gi-1092453380-gb-MAMS01000828\_1-:510238-511217  
gi-1092453380-gb-MAMS01000828.1-:510238-511217 Bemisia tabaci isolate MEAM1 Scaffold1195,  
whole genome shotgun sequence 980 bp

TACGTAGGGTGTCCCAAAGTACCGGGACTGGTTCTGTAAC TTCAAAGTAAGATAGATG  
CAGACATGATTTTGGTCTCATTTTAAAGATCAACTCAATACCTATCGATTAACCAAGA  
TCAGCTCAATCGAATAAAAATTGACCGAGTTATGACAATTTGAAATTAGTGAGGAAAGTT  
TACCCCTACGGTTTTTAGGAAGATTTTCGCTTACCAGGATTCAAAAAGTTAATATTCCT  
ATCCACTTTCCTCCGAATCTTCCATAACTTCCTTTCGCTTTTCAAAGTACCGTCCATCAA  
ACCGGATGCACTTTTTCATGCGCTCTTGCCACTTATCCAACATTGTTTTCTGAATTCTT  
CCTCTGGGATGGAGTTGAAGAAGTTTTGAATTGCATTCTGGATTTCCGGTCTTCGATACGA  
ATCTTCGTCCGCGAAGCTCCTTTTTAAGCGTAGGAAACATCCAAAAATCACATGGAGCCA  
AGTCAGGGCTATAAGGGGGATGAGGGATTGTTTCAACTCCATTTTTACTTATAAATTCAC

GTGTTAAGCTCGATGTGTGAGGCCGCGCATTGTCTTGATGGAGTATCCACGAAGCTTTCA  
AGTCCGACCGTTTCCGGGAAATGTGCATTCTCAACTCCTTTAGTACTTTGCAATAATACG  
CACTGTCAACTGTTGTGTTTGATGGTACAAAATGTTGATAAATGACACCTCGAAAATAAA  
AAAACACAATAAGCATCACTTTATCGGCCGACTTTTCGATTTACGGCGATGAAGAATCTT  
CCTGAAAAACCGTAGGCGTAACTTTCCTCGCTGATTTCAAATTGCCATAACTCGGTCAA  
TTTTTATCCGATTGAGCTGATCTTGGTTTTAATCGATAGGTATTAAGTTGATCTTTAAAA  
TGAAATCAAGATCATGTCTGTATCTATCTTACTTTTGAAGTTACAGAACAAGTCCCGCTG  
CTTTTGGGACACCTTATGTA

--

>Btmar2.8.39\_gi-1092453380-gb-MAMS01000828\_1-:236478-237459  
gi-1092453380-gb-MAMS01000828.1-:236478-237459 Bemisia tabaci isolate MEAM1 Scaffold1195,  
whole genome shotgun sequence 982 bp

TACGTAGGGTGTCCCAAAGTACCGGGACTGGCTCTGTAACCTCAAAGTAAGATAGATT  
CAGACATGATTTTGGTCTCATTTTAAAGATCAACTCAATACCTATCGATTAACCAAGA  
TCAGCTCAGTCGAATAAAAATTGACCGAGTTATGACAATTGAAATTAGTGAGGAAAGTT  
TACCCCTACTGTTTTTAGGAAGATTTTTCGCTTACCAGGATTCAAAAAGTTAATATTAGT  
ATCTACTTTCCTCCGAATCTTCCATAACTTCCTTTTGCTTCTCAAAGTACCGTCCATCAA  
ACCGGATGCACTTTTTCATGCGCTCTTGCCACTTATCCAACATTGTTTTCTGAACTCTT  
CCTCTGTGATGGAGTTGAAGAAGTTTTTCGAATTGCATTCTGGATTTCCGGTCTTCGATAC  
GAATCTTCGTCCGCGAAGCTTCTTTTTAAGCGTAGGAAACATCCAAAAATCACATGGAGC  
CAAGTCAGGGCTATAAGGGGGATGAGGGATTGTTCAACTCCATTTTTCCTATAAATTC  
ACGTGTTAAGCTCGATGTGTGAGGCCGCGCATTGTCTTGATGGAGTATCCACGAAGCTTT  
CAAGTCCGACCGTTTCCGGGAAATGTGCATTCTCACCTCCTTTAGTACTATGCAATAATA  
CGCACTGTCAACTGTTGTGTTTGATGGTACAAAATGTTGATAAATGACACCTCGAAAATA  
AAAAACACAATAAGCATCACTTTATCGGCCGACTTTTCGATTTACGGCGATGAAGAATC  
TTCCTTAAAAACCGTAGGCGTAACTTTCCTCGCTGATTTCAAATTGCCATAACTCGGTC  
AATTTTTATCCGATTGGGCTGATTTTGGTTTTAATCGATGGGTATTGAGTTGATCTTTAA  
AATGAGATCAAGATCATGTCTGTATCTATCTTACTTTTGAAGTTACAGAACAAGTCCCGG  
TGCTTTTGGGACACCTTATGTA

--

>Btmar2.8.40\_gi-1092455272-gb-MAMS01000090\_1-:5216809-5217788  
gi-1092455272-gb-MAMS01000090.1-:5216809-5217788 Bemisia tabaci isolate MEAM1 Scaffold300,  
whole genome shotgun sequence 980 bp

TACGTAGGGTGCCCCAAAAGTACCGGGACTGGTTCTGTAACCTCAAAGTAAGATAGATG  
CAGACATGATTTTGGTCTCATTTTAAAGATCAACTCAAATCCTATCGATTAAAACCAAGA  
TCAGCTCAATCGAATAAAAAATTGACCGAGTTATGACAATTTGAAATTAGTGAGGAAAGTT  
TACCCCTACGGTTTTTAGGAAGATTTTCGCTTACCAGGATTCAAAAAGTTAATATTCGT  
ATCCACTTTCCTCCGAATCTTCCATAATTTCTTTTGCTTTTCAAAGTACCGTCCATCAA  
ACCGGATGCACTTTTTCATGCGCTCTTGCCACTTATCCAACATTGTTTTCTGAATTCTT  
CCTCTGGGATGGAGTTGAAGAAGTTTTGAATTGCATTCTGGATTTCGGTCTTCGATACGA  
ATCTTCGTCCGCGAAGCTCCTTTTAAAGCGTGAGAAACATCCAAAAATCACATGGAGCCA  
AGTCAGCGCTATTAGGGGGATGAGAGATTGTTTCAACTCCATTTTACTCATAAATTCAC  
GTGTTAAGCTCGATGTGTGAAGCCGCGCATTGTCTTGATGGAGTATCCACGAAGCTTTCA  
AGTCCGACCGTTTCCGGGAAATGTGCATTCTCAACTCCTTTAGTACTTTGCAATAATACG  
CACTGTCAACTGTTGTGTTTGATGGTACAAAATGTTGATAAATGACACCTCGAAAATAAA  
AAAACACAATAAGCATCACTTTATCGGCCGACTTTTCGATTTACGGCGATGAAGAATCTT  
CCTTAAAAACCGTAGGCGTAAACTTTCCTCGCTGATTTCAAATTGCCATAACTCGGTCAA  
TTTTATCCGATTGAGCTGATCTTGCTTTTAATCGATAGGTATTGAGTTGATCTTTAAAA  
TGAAATCAAGATCATGTCTGTATCTATCTTACTTTCGAAGTTACAGAACAAGCCCCGGTG  
CTTTTGGGACACCTTACGTA

>Btmar2.8.41\_gi-1092455272-gb-MAMS01000090\_1-:1206819-1207801  
gi-1092455272-gb-MAMS01000090.1-:1206819-1207801 Bemisia tabaci isolate MEAM1 Scaffold300,  
whole genome shotgun sequence 983 bp

TACGTAGGGTGTCCCAAAGTACCGGGACTGGTTCTGTAACCTCAAAGTAAGATAGATA  
CAGACATGATTTTGGTTTCATTTTAAAGATCAACTCAATACCTATCGATTAAAACCAAGA  
TTAGCTCAATGGAATAAAAAATTGACCGAGTTATGACAATTTGAAATTAGTGAGGAAAGTT  
TACCCCTACGGTTTTTAGGAAGATTTTCGCTTACCAGGATTCAAAAAGTTAATATTCGT  
ATCCACTTGCCTCCGAATCTTCCATAACTTCTTTTGCTTTTGAAGTACCGTCCATCAA  
ACCGGATGCACTTTTTCATGCGCTCTTGCCACTTATTCAACATTGTTTTCTGAATTCTT  
CCTCTGGGATGGAGTTGAAGAAGTTTTGAATTGCATTCTGGATTTCGGTCTTCGATACGA



ATCTTCGTCCGCGAAGCTCCTTTTAAAGCGTAGGAAACATCCAAAAATCACATGGAGCCA  
AGTCAGGGCTATAAGGGGGATGAGGGATTGTTTCAACTCCATTTTACTCATAAATTCAC  
GTGTTAAGCTCGATGTGCGAGGCCGCGCATTGTCTTGATGGAGTATCCACGAAGGTTTCA  
AGTCCGACCGTTTCCGGGAAATGTGCATTCTCAACTCCTTTAGTACTTTGCAATAATACG  
CACTGTCAACTGTTGTGTTTGATGGTACAAAATGTTGATAAATGACACCTCGAAAATAAA  
AAAACACAATAAGCATCACTTTATCGGCCGACTTTTCGATTTACGGCGATGAAGAATCTT  
CCTTAAAAACCGTAGGGGTAATTAACTTTCCTCGCTGATTTCAAATTGCCATAACTCGGT  
CAATTGTTATTGATTGAGCTGATCTTGATTTAATCGATAGGTATTGAGTTAATCTTTA  
AAATGAGATCAAGATCATGTCTGTATCTATCTTACTTTCGAAGTTACAGAACAAGTCCCG  
GTGCTTTTGGGACACCTTATGTA

>Btmar2.8.42\_gi-1092455272-gb-MAMS01000090\_1-:2664585-2665539  
gi-1092455272-gb-MAMS01000090.1-:2664585-2665539 Bemisia tabaci isolate MEAM1 Scaffold300,  
whole genome shotgun sequence 955 bp

TACGTAGGGTGTCCAAAAGTACCGGGACTGGTTCTGTAACCTCAAAGTAAGATAGATA  
CAGACATGATTTTGGTTTTATTTTAAAGATCAACTCAATACCTATCGATTAAAACCAAGA  
TCAGCTCAATCGAATAAAAATTGATCGAGTTATGACAATTTGAAATTAGTGAGGAAAGTT  
TACCCCTACGGTTTTTAGGAAGATTTTCGCTTACCAGGATTCAAAAAGTAAATATTCGT  
ATCCACTTTCCTCCGAATCTTCATAACTTCCTTTTGCTTTTCAAAGTACCGTCCATCAA  
ACCGGATGCACTTTTTCATGCGCTCTTGCCACTTATCCAACATTGTTTTCTGAATTCTT  
CCTCTGGGATGGAGTTGAAAAAGTTTTGAATTGCATTCTGGATTTCGGTCTTCGATACGA  
ATCTTCGTCCGCGAAGCTCCTTTTAAAGCGTAGGAAACATCCAAAAATCACATGAAGCCA  
AGTCAGGGCTATAAGGGGGATGAGGGATTGTTTCAACTCCATTTTACTCATAAATTCAC  
GTGTTAAGCTCGATGTGTGAGGCCGCGCATTGTCTTGATGGAGTATCCACGAAGCTTTCA  
AGTCCGACCGTTTCCGGGAAATGTGCATTCTCAACTCCTTTAGTATACTTTGCAATAATA  
CGCACTGTCAACTATTGTGTTTGATGGTACAAAATGTTGATAAATGACACCTCGAAAATA  
AAAAACACAATAAGCATCACTTTATCGGCCGACTTTTCGATTTACGGCGATGAAGAATC  
TTCCTTAAAAACCGTAGGCGTAACTTTCCTCGCTGATTTCAAATTGCCATAACTCGGTC  
AATTTTTATCCGATTGAGCTGATTTTGGTTTTAATCGATGAGTATTGAGTTGATCTTTAA  
AATGAGATCAAGATCATGTCTGTATCTATCTTACTTTCGAAGTTACAGAACAAGT

--

>Btmar2.8.43\_gi-1092455411-gb-MAMS01000045\_1-:4668906-4669885  
gi-1092455411-gb-MAMS01000045.1-:4668906-4669885 Bemisia tabaci isolate MEAM1 Scaffold199,  
whole genome shotgun sequence 980 bp

TACGTAGGGTGTCCCAAAAGTACCGGGACTGGTTCTGTAACCTCAAAGTAAAATAGATG  
CAGACATGATTTTGGTCTCATTTTAAAGATCAACTCAATACCTATCGATTAACCAAGA  
TCAGCTCAATCAAATAAAAATTGACAGAGTTATGACAATTTGAAATTAGTGAAGAAAGTT  
TACTCCTACGGTTTTTAGGAAGATTTTCGCTTACCAGGATTCAAAAAGTTAATATTCGT  
ATCCACTTTCCTCCGAATCTTCCATAACTTCCTTTTGCTTTTCAAAGTACCGTCCATCAA  
ACCGGATGCACTTTTTCATGCGCTCTTGCCACTTATCCAACATTGTTTTCTGAATTCTT  
CCTCTGGGATGGAGTTGAAGAAGTTTTGAATTGCATTCTGGATTCGGTCTTCGATACGA  
ATCTTCGTCCGCAAAGCTCCTTTTAAAGCGTGGGAAACATCCAAAATCACATGGAGCCA  
AGTCAGCGCTATTAGGGGGATGAGGGATTGTTTCAACTCCATTTTACTCATAAATTCAC  
GTGTTAAGCTCGATGTGTGAGGCCGCGCATTGTCTTGATGGAGTATCCACGAAGCTTTCA  
AGTCCGATCGTTTCCGGGAAATGTGCATTCTCAACTCCTTTAGTACTTTGCAATAATACG  
CACTGTCAACTGTTGCGTTTGATGGTACAAAATGTTGATAAATGACACCTCGAAAATAAA  
AAAACACAATAAGCATCACTTTATCGGCCGACTTTTCGATTTACGGCGATGAAGAATCTT  
CCTTAAAAACCGTAGGCGTAAACTTTCCACGCTGATTTCAAATTGCCATAACTCGGTCAA  
TTTTTATTCGATTGAGCTGATCTTGGTTTTAATCGATAGGTATTGAGTTGATCTTTAAAA  
TGAGATCAAGATCATGTCTGTATCTATCTTACTTTGAAGTTACAGAACAAGTCCCGGTG  
CTTTTGGGACACCTTACGTA

>Btmar2.8.44\_gi-1092455411-gb-MAMS01000045\_1-:4127650-4128633  
gi-1092455411-gb-MAMS01000045.1-:4127650-4128633 Bemisia tabaci isolate MEAM1 Scaffold199,  
whole genome shotgun sequence 984 bp

TACGTAGGGTGTCCCAAAAATACCGGGACTGGTTCTGTAACCTCAAAGTAAGATAGATA  
CAGACATGATTTTGGTCTCATTTTAAAGATCAACTCAATACCTATCGATTAACCAAGA  
TCAGCTCAATCGAATAAAAATTGACCGAGTTATGACAATTTGAAATTAGTGAGGAAAGTT  
TACCCCTACGGTTTTTAGGAAGATTTTCGCTTACCAGGATTCAAAAAGTTAATATTCGT  
ATCCACTTTCCTCCGAATCTTCCATAACTTCCTTTTGCTTTTCAAAGTACCTACCGTCTA  
TCCAACCGATTGCACTTTTTCATGCGCTCTTGCCACTTATCCAACATTGTTTTCTGATT  
CTTCCTCTGGGATGGAGTTGAAGAAGTTTTGAATTGCATTCTGGATTCGGTCTTCGATA

CGAATCTTCGTCGCGAAGCTCCTTTTAAAGCGTAGGAAACATCCAAAAATCACATGGAG  
CCAAGTCAGGGCTAAAAGGGTGATGAGGGATTGTTCAATTCCATTTTACTCATAAATT  
CACGTGTTAAGCTCGATGTGTGAGGCCGCGCATTGTCTTGATGGAGTATCCACGAAGCTT  
TCAAGTCCGACCGTTTCCGGGAAATGTGCATTCTCAACTCCTTTAGTACTTTGCAATAAT  
ACGCACTGTCAACTATTGTGTTTGATGGTACAAAATGTTGATAAATGACACCTCGAAAAT  
AAAAAAACACAATAAGCATCGCTTTATCGGCCGACTTTTCGATTTACGGCGATGAAGAA  
TCTTCCTTAAAAACCGTAGGCGTAACTTTCCTCGCTGATTTCAAATTGCCATAACTCGG  
TCAATTTTATCCGATTGAGCTGATCTCGGGTTTAATCGATAGGTATTGAGTTGATCTTT  
AAAATGAAATCAAGATCATGTCTGTATCTATCTTACTTTGAAGTTACAGAAGAAGTCCC  
GGTGCTTTTGGGACACCTTATGTA

--

>Btmar2.8.45\_gi-1092455411-gb-MAMS01000045\_1-:4766922-4767650  
gi-1092455411-gb-MAMS01000045.1-:4766922-4767650 Bemisia tabaci isolate MEAM1 Scaffold199,  
whole genome shotgun sequence 729 bp

TACGTAGGGTGTCCCAAAGTACCGGGACCGTTCTGTAACCTCAAAGTAAGATAGATA  
CAGACATGATTTTGGTCTCATTTTAAAGATCAACTCAATACCTATCGATTAACCAAGA  
TCAGCTCAATCGAGTAAAAATTGACCGAGTTATGACAATTTGAAATTAGTGAGGAAAGTT  
TACCCCTATGGTTTTTAGGAAGATTTTCGCTTACCAGGATTTAAAAAGTTAATATTCGT  
ATCCACTTTCCTCCGAATCTTCATAACTTCCTTTTGCTTCTCAAAGTACCGTCCATCAA  
ACCGGATGCACTTTTTCATGCGCTCTTGCCACTTATCCAACATTGTTTTCTGAATTCTT  
CCTCTGGGATGGAGTTGAAGAAGTTTGAATTGCATTCTGGATTTTCGGTCTTCGATACGA  
ATCTTCGCCCCGGAAGCTCCTTTTAAAGCGTGGGAAACATCCAAAAATCACATGGAGCCA  
AGTCAGCGCTATAAGGGGGATGAGGGATTGTTCAACTCCATTTTACTCATGAATTCAC  
GTGTTAAGCTCGATGTGTGAGGCCGCGCATTGTTTTGATGGAGTATCCACGAAGCTTTCA  
AGTCCGACCGGTTCCAGGAAATGTGCATTCTCAACTCCTTTAGTACTTTGCAATAATACG  
CACTGTCAACTGTTGTGTTTGATGGTACAAAATGTTGATAAATGACACCTCTAAAATAAA  
AAAACACAA

--

>Btmar2.8.46\_gi-1092455507-gb-MAMS01000028\_1-:1766570-1767170  
gi-1092455507-gb-MAMS01000028.1-:1766570-1767170 Bemisia tabaci isolate MEAM1 Scaffold161,  
whole genome shotgun sequence 601 bp

AGGCTGTCCCTAAAGTACCCGGACTGGTCTATAACTTCAAACTACCGTAGATACAGAC  
ATGATCTTGGTCTCATTTTGAAGATCAATTTGATATCTATTGATTGAAACCAAGATCAGC  
TCAATCGAACAAAAATTGACCGAGTTCTGATAATTTAAATCAGTGGGTAAAGTTTACCC  
CTACGGTTATTAAGGAAGATTTTTCGCTTACCAGGATTCAAAAAGTTAACCTACGTTTCC  
ACTTTCCTCTGAATCTTCCATAACTTGCTTTTGCTTATCGAAGCACTGGCCATTAAACCA  
GATGCACTTATTCATGCGCTCTTGCCACCTCTCTAACATTGTTTTCTGAATTCTTCCTC  
TGGGATAAAGTTGAATAGGTTCCGAAGTGCATTCTGGATTTCGGTACTTGATTCAAATCT  
TTGTCCGCGAAGCTCCTTCTTAAGCGGAGGAAACATCCAAAAATCACGAGTAGCCGAGTC  
AGGGAAATAAGGGGGATGAAGGATTGTTTCAACTCAATTTTACTCTTAAATTCACGTGT  
AAAGTTCGAGGTGTGAGGTGAGGCCGCGCGTTGTCTTGGTGGAGCATCTACGAAGCTTTC  
A

--

>Btmar2.8.47\_gi-1092435969-gb-MAMS01009569\_1-:2970026-2971007  
gi-1092435969-gb-MAMS01009569.1-:2970026-2971007 Bemisia tabaci isolate MEAM1 Scaffold479,  
whole genome shotgun sequence 982 bp

TACGTAGGGTGTCCCAAAGTACCGGGACTGGTTCTGTAAGTCAAAAGTAAGATAGATA  
CAGACATGATTTTGGTCTTATTTTAAAGATCAACTCAATACCTATCGATTAACCAAGA  
TCAGCTCAATCGAATAAAAATTGACCGAGTTATGACAATTTGAAATTAGTGAGGAAAGTT  
TACCCCTACGGGTTTTAGGAAGATTTTTCGCTTACCAGGATTCAAAAAGTTAATATTCGT  
TTCCACTTTCCTCCGAATCTTCCATAACTTCCTTTTGCTTTTCAAAGTACCGTCCATCAA  
ACCGAATGCACTTTTTCATGCGCGCTTGCCACTTATCCAACATTGTTTTCTGAATTCTT  
CCTCTGGGATGGAGTTGAAGAAGTTTTGAATTGCATTCTGGATTTCGGTCTCCGATACGA  
ATCTTCGTCCGCGAAGCTCCTTTTAAAGCGTAGGAAACATCCAAAAATCACATGGAGCCA  
AGTCAGGGCTATAAGGGGGATGAGGGATTGTTTCAACTCCATTTTACTCATAAATTCAC  
GTGTTAAGCTCGATGTGTGAGGCCGCGCATTGTCTTGATGGAGTATATCCACGAAGCTTT  
CAAGTCCGACCGTTTCCGGGACATGTGCATTCTCAACTCCTTTAGTACTTTGCAATAATA

CGCACTGTCAACTGTTGTGTTTGATGGTACAAAATGTTGATAAATGACACCTCGAAAATA  
AAAAAACACAATAAGCATCACTTTATCCGCCGACTTTTCGATTTATGGCGATGAAGAATC  
TTCCTTAAAAACCGTAGGCGTAACTTTCTCGCTGATTTCAAATTGTCATAACTCGGTC  
AATTTTTATCCGATTGAGCTGATCTTGGTTTTAATCGATAGGTATTAAGTTGATCTTTAA  
AATGAAATCAAGATCATGTCTGTATCTATCTTACTTTTGAAGTTACAGAAGAAGTCCCGG  
TGCTTTTGGGACACCTTATGTA

--

>Btmar2.8.48\_gi-1092444632-gb-MAMS01004733\_1-:748748-749727  
gi-1092444632-gb-MAMS01004733.1-:748748-749727 Bemisia tabaci isolate MEAM1 Scaffold2737,  
whole genome shotgun sequence 980 bp

TACGTAGGGTGTCCCAAAAGTACCGGGACTGGTTCTGTAACCTCAAAAGTAAGATAGATA  
CAGACATGATTTTGGTCTCATTTTAAAGATCAACTCAATACCTATCGATTAACCAAGA  
TCAGCTCAATCGAATAAAAATTGACCGAGTTATGACAATTTGAAATTAGTGAGGAAAGTT  
TACCCCTACGGTTTTTAGGAAGATTTTCGCTTACCAGGATTCAAAAAGTTAATATTCGT  
ATCCACTTTCCTCCGAATCTTCATAACTTCCTTTTGCTTTTCAAAGTACCGTCCATCAA  
ACCGGATGCACTTTTTCATGCGCTCTTGCCACTTATCCAACATTGTTTTCTGAATTCTT  
CCTCTGGGATGGAGTTGAAGAAGTTTTGAATTGCATTCTGGATTTTTGTCTTCGATACGA  
ATCTTCGTCCGCGAAGCTCCTTTTAAAGCGCAGGAAACATCCAAAAATCACATGGAGCCA  
AGTCAGGACTATAAGAGGGATGAGGGATTGTTTCAGCTCCATTTTACTCATAAATTCAC  
GTGTTAAGCTCGATGTGTGAGGCCGCGCATTGTCTTGATGGAGTATCCACGAAGCTTTCA  
AGTCCGACCGTTTCCGGGAAATGTGCATTCTCAACTCCTTTAGTACTTTGCAATAATACG  
CACTGTCAACTGTTGTGTTTGATGGTACAAAATGTTGATAAATGACACCTCGAAAATAAA  
AAACACAATAAGCATCACTTTATCGGCCGACTTTTCGATTTACGGCGATGAAGAATCTT  
CCTTAAAAACCGTAGGCGTAACTTTCTCGCTGATTTCAAATTGCCATAACTCGGTCAA  
TTTTTATCCGATTGAGCTGATCTTGGTTTTAATCGATAGGTATTGAGTTGATCTTTAAAA  
TGAAATCAAGATCATGTCTGTATCTATCTTACTTTTGAAGTTACAGAACAAGTCCCGGTG  
CTTTTGGGACACCTTATGTA

>Btmar2.8.49\_gi-1092444632-gb-MAMS01004733\_1-:156378-157357  
gi-1092444632-gb-MAMS01004733.1-:156378-157357 Bemisia tabaci isolate MEAM1 Scaffold2737,  
whole genome shotgun sequence 980 bp

TACGTAGGGTGTCCCAAAAGTACCGGGACCGTTCTGTAACCTCAAAGTAAGATAGATA  
CAGACATGATTTTGGTCTCATTTTAAAGATCAACTCAATACCTATCGATTAACCAAGA  
TCAGCTCAATCGAATAAAAATTGACCGAGTCATGACAATTTGAAATTAGTGAGGAAAGTT  
TACCCCTACGGTTTTTAGGAAGATTTTCGCTTACCAGGATTCAAAAAGTTAATATTCGT  
ATCCACTTTCCTCCGAATCTTCATAACTTCCTTTTGCTTTCAAAGTACCGTCCATCAA  
ACCGGATGCACTTTTTCATGCGCTCTGCCACTTATCCAACATTGTTTTCTGAATTCTT  
CCTCTGGGATGGAGTTGAAGAAGTTTTGAATTGCATTCTGGATTTTCGGTCTTCGATACGA  
ATCTTCGTCCGCGAAGCTCCTTTTAAAGCGTAGGAAACATCCAAAAATCACATGGAGCCA  
AGTCAGGGCTGTAAGGGGGATGAGGGATTGTTTAACTCCATTTTACTCATAAATTCAC  
GTGTTAAGCTCGATGTGTGAGGCCGCGCATTGTCTTGATGGAGTATCCACGAAGCTTTCA  
AGTCCGACCGTTTCCGGGAAATGTGCATTCTCAACTCCTTTAGTACTTTGCAATAATACG  
CACTGTCAACTGTTGTGTTTGATGGTACAAGATGTTGATAAATGACACCTCGAAAATAAA  
AAACACAATAAGCATCACTTTATCGGACGACTTTTCGATTTACGGCGATGAAGAATTTT  
CCTTAAAAACCGTAGGCGTAACTTTCTCGCTGATTTCAAATTGCCATAACTCGGTCTGA  
TTTTATCCGATTGAGCTGATCTTGGTTTTAATCGATAGGTATTGAGTTGATCTTTAAAA  
TGAGATCAAGATCATGTCTGTATCTATCTTACTTTTGAAGTTACAGAACAAGTCCCGGTG  
CTTTGGGACACCTTACGTA

>Btmar2.8.50\_gi-1092444632-gb-MAMS01004733\_1-:1287534-1288512  
gi-1092444632-gb-MAMS01004733.1-:1287534-1288512 Bemisia tabaci isolate MEAM1 Scaffold2737,  
whole genome shotgun sequence 979 bp

TACGTAGGGTGTCCCAATAGTACCGGGACTGGTTCTGTAACCTCAAAGTAAGATAGATA  
CAGACATGATTTTGGTCTCATTTTAAAGATCAACTCAATACCTATCGATTAACCAAGA  
TCAGCTCAATCGAATAAAAATTGACCGAGTTATGACAATTTGAAATTAGTGAGGAAAGTT  
TACCCCTACGGTTTTTAGGAAGATTTTCGCTTACCAGCATTCAAAAAGTGAATATTCGT  
ATCCACTTTCCTCCGACTCTTCATAACTTCCTTTTGCTTTCAAAGTACCGTCCATCAA  
ACCGGATGCACTTTTTCATGCGCTCTGCCACTTATCCAACATTGTTTTCTGAATTCTT  
CCTCTGGGATGGAGTTGAAGAAGTTTTGAATTGCATTCTGAATTTTCGGTCTTCGATACGA  
ATCTTCGTCCGCGAAGCTCCTTTTAAAGCGTAGGAAACATCCAAAAATCACATGGAGCCA  
AGTCAGGGCTGTAAGGGGAATGAGGGATTGTTTCAACTCCATTTTACTCATAAATTCAC  
GTGTTAAGCTCGATGTGTGAGGCCGCGCTTGTCTTGATAGAGTATCCACGAAGCTTTCAA

GTCCGACCGTTTCCGGGAAATGTGCATTCTCAACTCCTTTAGCACTTTGCAATAATACGC  
ACTGTCAACTGTTGTGTTTGGTGGTACAAAATGTTGATAAATGACACCTCGAAAATAAAA  
AAACACAATAAGCATCACTTTATAGGCCGACTTTTCGATTACGGCGATGAAGAATCTTC  
CTTAAAAACCGTAGGCGTAACTTTCTCGCTGATTCAAATTGCCATAACTCGGTCAAT  
TTTTATCCGATTGAGCTGAGCTTGGTTTTAATCGATAGGTATTAAGTTGATCTTTAAAT  
GAGATCAAGATCATGTCTGTATCCATCTTACTTTCGAAGTTACAGAACAAGTCCCGGTGC  
TTTTGGGACACCTTATGTA

--

>Btmar2.8.51\_gi-1092454460-gb-MAMS01000340\_1-:3300740-3301719  
gi-1092454460-gb-MAMS01000340.1-:3300740-3301719 Bemisia tabaci isolate MEAM1 Scaffold1034,  
whole genome shotgun sequence 980 bp

TACATAGGGTGTCCCAAAGTACCGGGACTGGTTCTGTAACCTCAAAGTAAGATAGATA  
CAGACATGATTTTGGTCTCATTTTAAAGATCAACTCAATACCTATCGATTAACCAAGA  
TCAGCTCAATCGAATAAAATTTGACCGAGTCATGACAATTTGAAATTAGTGAGGAAAGTT  
TACCCCTACGGTTTTTAGGAAGATTTTCGCTTACCAGGATTCAAAAAGTTAATATTCGT  
ATCCACTTTCCTCCGAATCTTCATAACTTCCTTTTGCTTTTCAAAGTACCGTCCATCAA  
ACCGGATGCACTTTTTCATGCGCTCTTGCCACTTATCCAACATTGTTTTCTGAATTCTT  
CCTCTGGGATGGAGTTGAAGAAGTTTTGAATTGCATTCTGGATTTTGTCTTCGATACGA  
ATCTTCGTCCGCGAAGCTCCTTTTAAAGCGTAGGAAACATCCAAAAATCACATGGAGCCA  
AGTCAGGGCTATAAGGGGGATGAGGGATTGTTTCAACTCCATTTTACTCATAAATTCAC  
GTGTTAAGCTCGATGTGTGAGGCCGCGCATTGTCTTGATGGAGTATCCACGAAGCTTTCA  
AGTCCGACCGTTTCCGGGAAATGTGCATTCTCAACTCCTTTAGTACTTTGCAATAATACG  
CACTGTCAACTGTTGTGTTTGTATGGTACAAAATGTTGATAAATGACACCTCGAAAATAAA  
AAAACACAAAAAGCATCACTTTATCGGCCGACTTTTCGATTACGGCGATGAAGAATCTT  
CCTTAAAAACCGTAGGCGTAACTTTCTCGCTGATTCAAATTGCCATAACTCGGTCAA  
TTTTATCCGATTGAGCTGATTTTGGTTTTAATCGATGGGTATTGAGTTGATCTTTAAAA  
TGAGATCAAGATCATGTCTGTATCTATCTTACTTTCGAAGTTACAGAACAAGTCCCGGTG  
CTTTGGGACACCTTATGTA

--

>Btmar2.8.52\_gi-1092454862-gb-MAMS01000197\_1-:2011733-2012713  
gi-1092454862-gb-MAMS01000197.1-:2011733-2012713 Bemisia tabaci isolate MEAM1 Scaffold619,  
whole genome shotgun sequence 981 bp

TACGTAGGGTGTCCCAAAAGTACCCGGACTGGTTCTGTAACCTCAAAAGTAAGATAGATA  
CAGACATGATTTTGGTCTCATTTTGAAGATCAACTCAATACCTATCGATTAAAACCAAGA  
TCAGCCCAATCGAATAAAAATTGACCGAGTTATGACAATTTGAAATTAGTGAGGAAAGAT  
TACCCTTACGGTTTTTAGGAAGATTTTCGCTTACCAGGATTCAAAAAGTTAATATTCTT  
ACCCACTTTCCTCCGAATCTTCCATAACTCTCTTTTGCTTTTCAAAGTACCGTCCATCAA  
ACCGGATGCACTTTTTCATGCGCTCTTGCCACTTATCCAACATTGTTTTCTGAATTCTT  
CCTCTGGGGTGGAGTTGAAGAAGTTTTGAATTGCATTCTGGATTTTGTCTTCGATACGA  
ATCTTCGTCCGCAAAGCTCCTTTTAAAGCGTAGGAAACATCCAAAAATCACATGGAGCCA  
AGTCAGGGCTATAAGGGGGATGAAGGATTGTTTCAACTCCATTTTACTCATAAATCACG  
TGTTAAGCTCGATGTGTGAGGCCGCGCATTGTCTTGATGGAGTATCCACGAAGCTTTCAA  
GTCCGACCGTTTCCGGGAAGGTGCATTCTCAACCCCTTAGTACTTTGCAATAATACGC  
ACTGTCAACTGTTGTGTTTGATGGTACAAAATGTTGATAAATGACACCTCGAAAATAAAA  
AAAAACACAATAAGCATCACTTTATCGGCCGACTTTTCGATTACGGCGATGAAGAATCT  
TCCTTAAAAACCGTAGGCGTAACTTTCCTCGCTGATTCAAATTGCCATAACTCGGTCA  
ATTTTATCCGATTGAGCTGATCTTGTTTTAATCGATGGGTATTGAATTGATCTTTAAA  
ATGAGATCAAGATCATGTCTGTATCTATCTTACTTTCGAAGTTACAGAACAAGTCCCGGT  
GCTTTTGGGACACCTTATGTA

--

>Btmar2.8.53\_gi-1092454901-gb-MAMS01000188\_1-:141839-142819  
gi-1092454901-gb-MAMS01000188.1-:141839-142819 Bemisia tabaci isolate MEAM1 Scaffold596, whole  
genome shotgun sequence 981 bp

TACGTAGGGTGTCCCAAAAGTACCGGGACTGGTTCTGTAACCTCAAAAGTAAGATAGATA  
CAGACATGATTTTGGTCTCATTTTAAAGATCAACTCAATACCTATCGATTAAAACCAAGA  
TCAGCTCAATCGAATAAAAATTGACCGAGTTATGACAATTTGAAATTAGTGAGGAAAGTT  
TACCCCTACGGTTTTTAGGAAGATTTTCGCTTACCAGGATTCAAAAAGTTAATATTCGT  
ATCCACTTTCCTCCGAATCTTCCATAACTTCTTTTGCTTTTCAAAGTACCGTCCATCAA  
ACCGGATGCACTTTTTCATGCGCTCTTGCCACTTATCCAACATTGTTTTCTGAATTCTT



CCTCTGGGATGGAGTTGAAGAAGTTTTGAATTGCATTCTGGATTTTGTCTTCGATACGA  
ATCTTCGTCCGCGAAGCTCCTTTTAAGCGCAGGAAACATCCAAAAATCACATGGAGCCA  
AGTCAGGACTATAAGAGGGGATGAGGGATTGTTCAACTCCATTTTACTCATAAATTCAC  
GTGTTAAGCTCGATGTGTGAGGCCGCGCATTGTCTTGATGGAGTATCCACGAAGCTTTCA  
AGTCCGACCGTTTCCGGGAAATGTGCATTCTCAACTCCTTTAGTACTTTGCAATAATACG  
CACTGTCAACTGTTGTGTTTGATGGTACAAAATGTTGATAAATGACACCTCGAAAATAAA  
AAAACACAATAAGCATCACTTTATCGGCCGACTTTTCGATTTACGGCGATGAAGAATCTT  
CCTTAAAAACCGTAGGCGTAAACTTTCTCGCTGATTTCAAATTGCCATAACTCGGTCAA  
TTTTATCCGATTGAGCTGATCTTGGTTTTAATCGATAGGTATTGAGTTGATCTTTAAA  
ATGAAATCAAGATCATGTCTGTATCTATCTTACTTTCGAAGTTACAGAACAAGTCCCGGT  
GCTTTTGGGACACCTTATGTA

--

>Btmar2.8.54\_gi-1092455481-gb-MAMS01000031\_1-:3218332-3219311  
gi-1092455481-gb-MAMS01000031.1-:3218332-3219311 Bemisia tabaci isolate MEAM1 Scaffold17,  
whole genome shotgun sequence 980 bp

TACGTAGGGTGTCCCAAAGTACCGGGACTGGTTCTGTAACCTCAAAGTAAGATAGATG  
CAGACATGATTTTGGTCTCATTTTAAAGATCAACTCAATACCTATCGATTTAAACCAAGA  
TCAGCTCAATCAAATAAAAATTGACCGAGTTATGACAATTTGAAATTAGTGAGGAAAGTT  
TACCCCTACGGTTTTTAGGAAGATTTTCGCTTACCAGGATTCAAAAAGTTAATATTCGT  
ATCCACTTTCCTCCGAATCTTCCATAACTTCCTTTTGCTTTTCAAAGTACCGTCCATCAA  
ACCGGATGCATTTTTCATGCGCTCTTGCCACTTATCCAACATTGTTTTCTGAATTCTT  
CCTCTGGGATGGAGTTGAAGAAGTTTTGAATTGCATTCTGGATTTTGTCTTCGATACGA  
ATCTTCGTCCGCGAAGCTCCTTTTAAGCGCAGGAAACATCCAAAAATCACATGGAGCCA  
AGTCAGGACTATAAGGGGGATGAGGGATTGTTCAACTCCATTTTACTCATAAATTCAC  
GTGTTAAGCTCGATGTGTGAGGCCGCGCATTGTCTTGATGGAGTATCCACGAAGCTTTCA  
AGTCCGACCGTTTCCGGGAAATGTGCATTCTCAACTCCTTTAGTACTTTGCAATAATACG  
CACTGTCAACTGTTGTGTTTGATGGTACAAAATGTTGATAAATGACACCTCGAAAATAAA  
AAAACACAATAAGCATCACTTTATCGGCCGACTTTTCGATTTACGGCGATGAAGAATCTT  
CCTTAAAAACCGTAGGCGTAAACTTTCTCGCTGATTTCAAATTGCCATAACTCTGTCAA  
TTTTATCCGATTGAGCTGATCTTGGTTTTAATCGATAGGTATTGAGTTGATCTTTAAAA

TGAAATCAAGATCATGTCTGTATCTATCTTACTTTTGAAGTTACAGAACAAGTCCCGGTG  
CTTTTGGGACACCTTATGTA

>Btmar2.8.55\_gi-1092455481-gb-MAMS01000031\_1-:3201139-3202118  
gi-1092455481-gb-MAMS01000031.1-:3201139-3202118 Bemisia tabaci isolate MEAM1 Scaffold17,  
whole genome shotgun sequence 980 bp

TACGTAGGGTGTCCCAAAAGTACCGGGACTGGTTCTGTAACCTCAAAGTAAGATAGATA  
CAGACATGATTTTGGTCTCATTTTAAAGATCAACTCAATACCTATCGATTAACCAAGA  
TCAGCTCAATCGAATAAAAATTGACCGAGTTATGACAATTTGAAATTAGTGAGGAAAGTT  
TACCCCTACGGTTTTTAGGAAGATTTTCGCTTACCAGGATTCAAAAAGTTAATATTCGT  
ATCCACTTTCCTCCGAATCTTCATAACTTCCTTTGCTTTCAAAGTACCGTCCATCAA  
ACCGGATGCACTTTTTCATGCGCTCTTGCCACTTATCCAACATTGTTTTCTGAATTCTT  
CCTCTGGGATGGAGTTGAAGAAGTTTTGAATTGCATTCTGGATTTCGGTCTTCGATACGA  
ATCTTCGTCCGCGAAGCTCCTTTTAAAGCGTAGGAAACATCCAAAAATCACATGGAGCCA  
AGTCAGGGCTATAAGGGGGATGAGGGATTGTTCAACTCCATTTTACTCATAAATTCAC  
GTGTTAAGCTCGATGTGTGAGGCCGCGCATTGTCTTGATGGAGTATCCACGAAGCTTTCA  
AGTCCGACGGTTTCCGGGAAATGTGCATTCTCAACTCCTTTAGTACTTTGCAATAATACG  
CACTGTCAACTGTTGTGTTTGATGGTACAAAATGTTGATAAATGACACCTCGAAAATAAA  
AAAACACAATAAGCATCACTTTATCGGCCGACTTTTCGATTTACGGCGATGAAGAATCTT  
CCTTAAAAACCGTAGGCGTAACTTTCCTCGCTGATTTCAAATTGCCATAACTCGGTCAA  
TTTTTATCCGATTGAGCTGTTCTTGGTTTTAATCGATAGGTATTGAGTTGATCTTTAAAA  
TGAGATCAAGATCATGTCTGTATCTATCTTACTTTTGAAGTTACAGAACAAGTCCCGGTG  
CTTTTGGGACACCTTACGTA

>Btmar2.8.56\_gi-1092455481-gb-MAMS01000031\_1-:1933785-1934764  
gi-1092455481-gb-MAMS01000031.1-:1933785-1934764 Bemisia tabaci isolate MEAM1 Scaffold17,  
whole genome shotgun sequence 980 bp

TACGTAGGGTGTCCCAAAAGTACCGGGACTGGTTCTGTAACCTCAAAGTAAGATAGATA  
CAGACATGATTTTGGTCTCATTTTGAAGATCAACTCAATACCTATCGATTAACCAAGA  
TCAGCTCAATCAAATAAAAATTGACCGAGTTAAGACAATTTGAAATTAGTGAGGAAAGTT  
TACCCCTACGGTTTTTAGGAAGATTTTCGCTTACCAGGATTCAAAAAGTTAATATTCGC  
ATCCACTTTCCTCCGAATCTTCATAATTTCTTTTGCTTTCAAAGTACCGTCCATCAA

ACCGGATGCACTTTTTCATGCGCTCTGCCACTTATCCAACATTGTTTTCTGAATTCTT  
CCTCTGGGATGGAGTTGAAGAAGTTTTGAATTGCATTCTGGATTTTTGTCTTCGATACGA  
ATCTTCGTCCGCGAAGCTCCTTTTTAAGCGTAGGAAACATCCAAAAATCACATGTAGCCA  
AGTCAGGGCTATAAGGGGGATGAGGGATTGTTCAACTCCATTTTACTCATAAATTCAC  
GTGTTAAGCTCGATGTGTGAGGCCGCGCATTGTCTTGATGGAGTATCCACGAAGCTTTCA  
AGTCCGACCGTTTCCGGGAAATGTGCATTCTCAACTCCTTTAGTACTTTGCAATAATACG  
CACTGTCAACTGTTGTGTTTGATGGTACAAAATGTTGATAAATGACACCTCGAAAATAAA  
ATAACACAATAAGCATCACTTTATAGCCGACTTTTCGATTTACGGCGATGAAGAATCTT  
CCTTAAAAACCGTAGGCGTAAACTTTCTCGCTGATTTCAAATTGCCATAACTCGGTCAA  
TTTTTATCCGATTGAGCTGATTTTGGTTTTAATCGATGGGTATTGAGTTGATCTTTAAAA  
TAAAATCAAGATCATGTCTGTATCTATCTTATTTTCGAAGTTACAGAACAAGTCCCGGTG  
CTTTTGGGACACCTTATGTA

>Btmar2.8.57\_gi-1092455481-gb-MAMS01000031\_1-:1347765-1348744

gi-1092455481-gb-MAMS01000031.1-:1347765-1348744 Bemisia tabaci isolate MEAM1 Scaffold17,  
whole genome shotgun sequence 980 bp

TACGTAGGGTGTCCCAAAAGTACCGGGACTGGTTCTGTAACCTCAAAGTAAGATAGATA  
CAGACATGATTTTGGTCTCATTTTAAAGATCAACTCAATACCTATCGATTTAAACCAAGA  
TCAGCTCAATCGGATAAAAATTGACCGAGTTATGACAATTTGAAATTAGTGAGGAAAGTT  
TACCCCTACGGTTTTTAGGAAGATTTTCGCTTACCAGGATTCAAAAAGTTAATATTCGT  
ATCCACTTTCCTCCGAATCTTCCATAACTTCCTTTTGCTTTTCAAAGTACCGTCCATCAA  
ACCGGATGCACTTTTTCATGCGCTCTGCCACTTATCCAACATTGTTTTCTGAATTCTT  
CCTCTGGGATGGCGTTGAAAAAGTTTTGAATTGCATTCTGGATTTTCGGTCTTCATTTCGA  
ATCTTCGTCCACGAAGCTCCTTTTTAAGTGTAGGAAACATCCAAAAATCACATGGAGCCA  
AGTCAGGGCTGTAAGGGGGATGAGGGATTGTTCAACTCCATTTTACTCATAAATTCAC  
GTGTTAAGCTCGATGTGTGAGGCCGCGCTTGCTTGATGGAGTATCCACGAAGCTTTCAA  
GTCCGACCGTTTCCGGGAAATGTGCATTCTCAACTCCTTTAGCACTTTGCAATAATACGC  
ACTGTCAACTGTTGTGTTTGGTGGTACAAAATGTTGATAAATGACACCTCGAAAATGAAA  
AAAACACAATAAGCATCACTTTATAGCCGACTTTTCGATTTACGGCGATGAAGAATCTT  
CCTTAAAAACCGTAGGCGTAAACTTTCTCGCTGATTTCAAATTGCCATAACTCGGTCAA  
TTTTTATCCGATTGAGCTGATCTTGGTTTTAATCGATAGGTATTGAGTTGATCTTTAAAA

TGAAATCAAGATCATGTCTGTATCCATCTTACTTTCGAAGTTACAGAACAAGTCCCGGTG  
CTTTTGGGACACCTTTTGTA

--

>Btmar2.8.58\_gi-1092455481-gb-MAMS01000031\_1-:3208444-3209426  
gi-1092455481-gb-MAMS01000031.1-:3208444-3209426 Bemisia tabaci isolate MEAM1 Scaffold17,  
whole genome shotgun sequence 983 bp

TACGTAGGGTGTCCCAAAGTACCGGGACTGGTTCTGTAACCTCAAAGTAAGATAGATT  
CAGACATGATTTTGGTCTCATTTTAAAGATCAACTCAATACCTATCGATTAACCAAGA  
TCAGCTCAATCGGATAAAAATTGACCGAGTTATGACAATTTGAAATTAATGAGGAAAGTT  
TACCCCTACGGTTTTTAGGAAGATTTTCGCTTACCAGGATTCAAAAAGTTAATATTCGT  
ATCCACTTTCCTCCGAATCTTCATAACTTCCTTTTGCTTTTCAAAGTACCGTCCATCAA  
ACCGGATGCACTTTTTCATGCGCTCTTCCACTTATCCAACATTGTTTTCCTGAATTCTT  
CCTCTGGGATGGCGTTGAAAAAGTTTGAATTGCATTCTGGATTTTCGGTCTTCGATTCTGA  
ATCTTCGTCCGCGAAGCTTCTTTTAAGCGTAGGAAACATCCAAAAATCACATGGAGCCA  
AGTCAGGACCATAAGAAGGATGAGGGATTGTTTCAACTCCATTTTACTCATAAATTCAC  
GTGTTAAGCTCGATGTGTGAGGCCGCGCTTGTCTTGATGGAGTATCCACGAAGCTTTCAA  
GTCCGACCGTTTCCGGGAAATGTGCATTCTCAACTCCTTTAGCACTTTGCAATAATACGC  
ACTCTCAACTGTTGTGTTTGGTGGTACAAAATGTTGATACTTAAATGACACCTCGAAAAT  
AAAATAACACAATAAGCATCACTTTATAGGCCGACTTTTCGATTTACGGCGATGAAGAAT  
CTTCCTTAAAAACCGTAGGCGTAACTTTCCTCGCTGATTTCAAATTGCCATAACGCGGT  
CAATTTTATCCGATTGAGCTGATCTTGGTATTAATCGATAGGTATTGAGTTGATCTTTA  
AAATGAGATCAAGATCATGTCTGTATCTATCTTACTTTCGAAGTTACAGAACAAGTCCCG  
GTGCTTTTGGGACACCTTATGTA

>Btmar2.8.59\_gi-1092455481-gb-MAMS01000031\_1-:1431035-1431763  
gi-1092455481-gb-MAMS01000031.1-:1431035-1431763 Bemisia tabaci isolate MEAM1 Scaffold17,  
whole genome shotgun sequence 729 bp

TACGTAGGGTGTCCCAAAGTACCGGGACTGGTTCTGTAACCTCAAAGTAAGATAGATA  
CAGACATGATTTTGGTCTTATTTTAAAGATCAACTCAATACCTATCGATTAACCAAGA  
TCAGCTCAATCGAATAAAAATTGACCGAGTTATGACAATTTGAAGTTAGTGAGGAAAGTT  
TACCCCTACGGTTTTTAGGAAGATTTTCGCTTACCAGGATTTAAAAAGTTAATATTCGT

ATCCACTTTCCTCCGAATCTTCCATAACTTCCTTTTGCTTTTCAAAGTACCGTCCATCAA  
ACCGGATGCACTTTTTTCATGCGCTCTTGCCACTTATCCAACATTGTTTTCTGAATTCTT  
CCTTTGGGATGGAGTTGAAGAAGTTTTGAATTGCATTCTGGATTTCGGTCTTCGATACGA  
ATCTTCGTCCGCGAAGCTCCTTTTTAAGCGTGGGAAACATCCAAAAATCACATGGAGCCA  
AGTCAGCGCTATAAGGGGGATGAGGGATTGTTTCAACTCCATTTTTACTCATAAATTCAC  
GTGTTAAGCTCGATGTGTGAGGCTGCGCATTGTTTTGATGGAGTATCCACGGAGCTTTCA  
AGTCCAACCGTTTCCGGGAAATGTGCATTCTCAACTCCTTTAGTACTTTGCAATAATACG  
CACTGTCAACTGTTGTGTTTGATGGTACAAAATGTTGATAAATGACACCTCGAAAATAAA  
AAAACACAA

--

>Btmar2.8.60\_gi-1092436163-gb-MAMS01009375\_1-:1407701-1408371  
gi-1092436163-gb-MAMS01009375.1-:1407701-1408371 Bemisia tabaci isolate MEAM1 Scaffold4704,  
whole genome shotgun sequence 671 bp

TATGACAATTTGAAATTAGTGAGGAAAGTTTACCCCTACGGTTTTTAGGAAGATTTTTCG  
CTTACCAGGATTCAAAAAGTGAATATTCGTATCCACTTTCCTCCGAATCTTCCATAACTT  
CCTTTTGCTTTTCAAAGTACCGTCCATCAAACCGGATGCCCTTTTTCATGCGCTCTTGCG  
ACTTATCCAACATTGTTTTCTGAATTCTTCCTCTGGGATGGCGTTGAAAAAGTTTTGAA  
TTGCATTCTGGATTTCGTCTTCGATACGAATCTTCGTCCGCGAAGCTCCTTTTTAAGCG  
TAGGAAACATCCAAAAATCACATGGAGCCAAGTCAGGGCTGTAAGGGGGATGAGAGGTTG  
TTTCAACTCCATTTTTACTCATAAATTCACGTGTTAAGCTCGATGTGTGAGGCCGCGCTT  
GTCTTGATGGAGTATCCACGAAGCTTTCAAGTCCGACCGTTTCCGGGAAATGTGCATTCT  
CAACTCCTTTAGCACTTTGCAATAATACGCACTGTCAACTGTTGTGTTTGGTGGTACAAA  
ATGTTGATAAATGACACCTCGAAAATGAAAAAACACAATAAGCATCACTTTATAGGCCG  
ACTTTTCGATTTACGGCGATGAAGAATCTTCCTTAAAGACCGTAGGCGTGAACCTTCCTC  
GCTGATTTCAA

--

>Btmar2.8.61\_gi-1092455544-gb-MAMS01000025\_1-:4128710-4129689  
gi-1092455544-gb-MAMS01000025.1-:4128710-4129689 Bemisia tabaci isolate MEAM1 Scaffold147,  
whole genome shotgun sequence 980 bp

TACGTAGGGTGTCCCAAAAGTACCGGGACTGGTTCTGTAACCTCAAAGTAAGATAGATG

CAGACATGATTTTGGTCTCATTTTAAAGATCAACTCAATACCTATCGATTAACCAAGA  
TCAGCTCAATCGAATAAAAATTGACCGAGTTATGACAATTTGAAATTAGTGAGGAAAGTT  
TACCCCTACGGTTTTTAGGAAGATTTTCGCTTACCAGGATTCAAAAAGTTAATATTCGT  
ATCCACTTTCCTTCGAATCTTCCATAATTTCTTTTGCTTTTCAAAGTACCGTCCATCAA  
ACCGGATGCACTTTTTCATGCGCTCTGCCACTTATCCAACATTGTTTTCTGAATTCTT  
CCTCTGGGATGGAGTTGAAGAAGTTTTGAATTGCATTCTGGATTCGGTCTTCGATACGA  
ATCTTCGTCCGCGAAGCTCCTTTTAAAGCGTGGGAAACATCCAAAAATCACATGGAGCCA  
AGTCAGCGCTATTAGGGGGATGAGGGATTGTTTCAACTCCATTTTACTCATAAATTCAC  
GTGTTAAGCTCGATGTGTGAGGCCGCGCATTGTCTTGATGGAGTATCCACGAAGCTTTCA  
AGTCCGACCGTTTCCGGGAAATGTGCATTCTCAACTCCTTTAGTACTTTGCAATAATACG  
CACTGTCAACTGTTGTGTTTGATGGTACAAAATGTTGATAAATGACACCTCGAAAATAAA  
AAACACAATAAGCATCACTTTATCGGCCGACTTTTCGATTTACGGTGATGAAGAATCTT  
CCTTAAAAACCGTAGGCGTAACTTTCTCGCTGATTTCAAATTGCCATAACTCGGTCAA  
TTTTATCCGATTGAGCTGATCTTGGTTTTAATCGATAGGTATTGAGTTGATCTTTAAAA  
TGAAATCAAGATCATGTCTGTATCTATCTTACTTTGAAGTTACAGAACAAGTCCCGGTG  
CTTTTGGGACACCTTACGTA

--

>Btmar2.8.62\_gi-1092454879-gb-MAMS01000194\_1-:447857-448836  
gi-1092454879-gb-MAMS01000194.1-:447857-448836 Bemisia tabaci isolate MEAM1 Scaffold610, whole  
genome shotgun sequence 980 bp

TACGTAGGGTGTCCTCAAAAAGTACCGGGACTGGTTCTGTAACCTCAAAAGTAAGATAGATG  
CAGACATGATTTTGGTCTCATTTTAAAGATCAACTCAATACCTATCGATTAACCAAGA  
TCAGCTCAATCGAATAAAAATTGACCGAGTTATGACAATTTGAAATTAGTGAGGAAAGTT  
TACCCCTACGGTTTTTAGGAAGATTTTCGCTTACCAGGATTCAAAAAGTTAATATTCCT  
ATCCACTTTCCTCCGAATCTTCCATAACTTCTTTTCGCTTTTCAAAGTACCGTCCATCAA  
ACCGGATGCACTTTTTCATGCGCTCTGCCACTTATCCAACATTGTTTTCTGAATTCTT  
CCTCTGGGATGGAGTTGAAGAAGTTTTGAATTGCATTCTGGATTCGGTCTTCGATACGA  
ATCTTCGTCCGCGAAGCTCCTTTTAAAGCGTAGGAAACATCCAAAAATCACATGGAGCCA  
AGTCAGGGCTATAAGGGGGATGAGGGATTGTTTCAACTCCATTTTACTTATAAATTCAC  
GTGTTAAGCTCGATGTGTGAGGCCGCGCATTGTCTTGATGGAGTATCCACGAAGCTTTCA

AGTCCGACCGTTTCCGGGAAATGTGCATTCTCAACTCCTTTAGTACTTTGCAATAATACG  
CACTGTCAACTGTTGTGTTTGATGGTACAAAATGTTGATAAATGACACCTCGAAAATAAA  
AAAACACAATAAGCATCACTTTATCGGCCGACTTTTCGATTACGGCGATGAAGAATCTT  
CCTGAAAAACCGTAGGCGTAACTTTCTCGCTGATTTCAAATTGCCATAACTCGGTCAA  
TTTTATCCGATTGAGCTGATCTTGGTTTTAATCGATAGGTATTAAGTTGATCTTTAAAA  
TGAAATCAAGATCATGTCTGTATCTATCTTACTTTCGAAGTTACAGAACAAGTCCCGGTG  
CTTTGGGACACCTTATGTA

--

>Btmar2.8.63\_gi-1092435476-gb-MAMS01010062\_1-:9349-10328  
gi-1092435476-gb-MAMS01010062.1-:9349-10328 Bemisia tabaci isolate MEAM1 Scaffold4996, whole  
genome shotgun sequence 980 bp

TACGTAGGGTGTCCCAAAGTACCGGGACTGGTTCTGTAACCTCAAAGTAAGATAGATA  
CAGACATGATTTTGGTCTCATTTTAAAGATCAACTCAATACCTATCGATTAACCAAGA  
TCAGCTCAATCGAATAAAATTGACCGAGTTATGACAATTTGAAATTAGTGAGGAAAGTT  
TACCCCTACGGTTTTTAGGAAGATTTTCGCTTACCAGGATTCAAAAAGTTAATATTCGT  
ATCCACTTTCCTCCGAATCTTCCATAACTTCCTTTTGCTTTTCAAAGTACCGTCCATCAA  
ACCGGATGCACTTTTTCATGCGCTCTTGCCACTTATCCAACATTGTTTTCTGAATTCTT  
CCTCTGGGATGGAGTTGAAGAAGTTTTGAATTGCATTCTGGATTTTGGTCTTCGATACGA  
ATCTTCGTCCGCGAAGCTCCTTTTAAAGCGTAGGAAACATCCAAAATCACATGGAGCCA  
AGTCAGGGCTATAAGGGGGATGAGGGATTGTTTCAACTCCATTTTACTCATAAATTCAC  
GTGTTAAGCTCGATGTGTGAGGCCGCGCATTGTCTTGATGGAGTATCCACGAAGCTTTCA  
AGTCCGACCGTTTCCGGGAAATGTGCATTCTCAACTCCTTTAGTACTTTGCAATAATACG  
CACTGTCAACTGTTGTGTTTGATGGTACAAAATGTTGATAAATGACACCTCGAAAATAAA  
AAAACACAATAAGCATCACTTTATCGGCCGACTTTTCGATTACGGCGATGAAGAATCTT  
CCTTAAAAACCGTAGGCGTAACTTTCTCGCTGATTTCAAATTGCCATAACTCGGTCAA  
TTTTATCCGATTGAGCTGATCTTGGTTTTAATCGATAGGTATTGAGTTGATCTTTAAAA  
TGAAATCAAGATCATGTCTGTATCTATCTTACTTTCGAAGTTACAGAACAAGTCCCGGTG  
CTTTGGGACACCTTATGTA

--

>Btmar2.8.64\_gi-1092453820-gb-MAMS01000625\_1-:162320-163171  
gi-1092453820-gb-MAMS01000625.1-:162320-163171 Bemisia tabaci isolate MEAM1 Scaffold1131,  
whole genome shotgun sequence 852 bp

GAGTAAAAATTGACCGAGTTATGACAATTTGAAATTAGTGAGGAAAGTTTACCCCTACGG  
TTTTTAGGAAGATTTTTCGCTTACCAGGATTCAAAAAGTTAATATTCGTATCCACTTTCC  
TCCGAATCTTCCATAACTTCCTTTTGCTTTTCAAAGTACCGTCCATCAAACCGGATGCAC  
TTTTTCATGCGCTCTTCCACTTATCCAACATTGTTTTCTGAATTCTTCCTCTGGGATG  
GCGTTGAAAAAGTTTTGAATTGCATTCTGGATTTCTGGTCTTCGATTCTGAATCTTCGTCCG  
CGAAGCTTCTTTTAAGCGTAGGAAACATCCAAAAATCACATGGAGCCAAGTCAGGGCTG  
TAAGGGGGATGAGGGATTGTTTCAACTCCATTTTACTCATAAATTCACGTGTTAAGCTC  
GATGTGTGAGGCCGCGCTTGTCTTGATGGAGTATCCACGAAGCTTCAAGTCCGACCGTT  
TCCGGGAAATGTGCATTCTCAACTCCTTTAGCACTTTGCAATAATACGCACTCTCAACTG  
TTGTGTTTGGTGGTACAAAATGTTGATACTTAAATGACACCTCGAAAATAAAATAACACA  
ATAAGCATCACTTTATAGGCCGAATTTTCGATTTACGGCGATGAAGAATCTTCCTTAAAA  
ACCGTAGGCGTAAACTTTCCTCGCTGATTTCAAATTGCCATAACTCGGTCAATTTTTATC  
CGATTGAGCTGATCTTGGTTTTAATCGATGGGTATTGAGTTGATCTTTAAATGAAATCA  
AGATCATGTCTGTATCTATCTTACTTTTGAAGTTACAGAACAAGTCCCGGTGCTTTTGGG  
ACATCTTATGTA

--

>Btmar2.8.65\_gi-1092455247-gb-MAMS01000092\_1-:1580016-1580744  
gi-1092455247-gb-MAMS01000092.1-:1580016-1580744 Bemisia tabaci isolate MEAM1 Scaffold310,  
whole genome shotgun sequence 729 bp

TACGTAGGGTGTCCCAAAAGTACCGGGACTGGTTCTGTAACCTCAAAAGTAAGATAGATA  
CAGACATGATTTTGGTCTCATTTTAAAGACCAACTCAATACCTATCGATTAAAACCAAGA  
TCAGCTCAATCGAATAAAAATTGACCGAGTTATGACAATTTGAAATTAGTGAGGAAAGTT  
TACCCCTACGTTTTTGTAGGAAGATTTTTCGCTTACCAGGATTTAAAAAGTTAATATTCGT  
ATCCACTTTCCTCCGAATCTTCCATAACTTCCTTTTGCTTTTCAAAGTACCGTCCATCAA  
ACCGGATGCACTTTTTTCATGCGCTCTTGCCACTTATCCAACATTGTTTTCTGAATTCTT  
CCTCTGGGATGGAGTTGAAGAAGTTTTGAATTGCATTCTGGATTTCTGGTCTTCGATACGA  
ATCTTCGTCCGCGAAGCTCCTTTTTAAGCGTGGGAAACATCCAAAAATCACATGGAGCCA



AGTCAGCGCTATAAGGGGGATGAGGGATTGTTTCAACTCCATTTTTACTCATAAATTCAC  
GTGTTAAGCTCGATGTGTGAGGCTGCGCATTGTTTTGATGGAGTATCCACGGAGCTTTCA  
AGTCCGACCGTTTCCGGGAAATGTGCATTCTCAACTCCTTTAGTACTTTGCAATAATACG  
CACTGTCAACTGTTGTGTTTGATGGTACAAAATGTTGATAAATGACACCTCGAAAATAAA  
AAAACACAA

>Btmar2.8.66\_gi-1092425792-gb-MAMS01019746\_1-:1085514-1086241  
gi-1092425792-gb-MAMS01019746.1-:1085514-1086241 Bemisia tabaci isolate MEAM1 Scaffold370,  
whole genome shotgun sequence 728 bp

ACGTAGGGTGTCCCAAAAGTACCGGGACTGGTCTGTAACCTCAAAGTAAGATAGATAC  
AGACATGATTTTGGTCTCATTTTAAAGATCAACTCAATACCTATCGATTAAAATCAAGAT  
CAGCTCAATCGAATAAAAATCGACCGAGTTATGACAATTTGAAATTAGTGAGGAAAGTTT  
ACCCCTACGGTTTTTAGGAAGATTTTTCGCTTACCAGGATTTAAAAAGTTAATATTCGTA  
TCCACTTTCCTCCGAATCTTCATAACTTCCTTTTGCTTTTCAAAGTACCGTCCATCAAA  
CCGGATGCACTTTTTTCATGCGCTCTTGCCACTTATCCAACATTGTTTTCTGAATTCTTC  
CTCTGGGATGGAGTTGAAGAAGTTTTGAATTGCATTCTGGATTCGGTCTTCGATACGAA  
TCTTCGTCCGCGAAGCTCCTTTTAAAGCGTGGGAAACATCCAAAAATCACATGGAGCCAA  
GTCAGCGCTAAAAGGGGGATGAGGGATTGTTTCAACTCCATTTTTACTCATAAATTCACG  
TGTTAAGCTCGATGTGTGAGGCCGCGCATTGTTTTGATGGAGTATCCACGGAGCTTTCAA  
GTCCGACCGTTTCCGGGAAATGTGCATTCTCAACTCCTTTAGTACTTTGCAATAATACGC  
ACTGTCAACTGTTGTGTTTGATGGTACAAAATGTTGATAAATGACACCTCGAAAATAAAA  
AAACACAA

>Btmar2.8.67\_gi-1092452725-gb-MAMS01001096\_1-:430136-431115  
gi-1092452725-gb-MAMS01001096.1-:430136-431115 Bemisia tabaci isolate MEAM1 Scaffold1294,  
whole genome shotgun sequence 980 bp

TACGTAGGGTGTCCCAAAAGTACCGGTACTGATTCTGTAACCTCAAAGTAAGATAGATA  
CAGACATGATTTTGGTCTCATGTTAAAGATTAACCTCAATACCTATCGATTAAACCAAGA  
TCAGCTCAATCGAATAAAAATTGACCGAGTTATGACAATTTGAAATTAGTGAGGAAAGTT

TACCCCTACGGTTTTTAGGAAGATTTTCGCTTACCAGGATTCAAAAAGTTAATATTCGT  
ATCCACTTTCCTCCGAATCTTCCATAACTTCCTTTTGCTTTTCAAAGTACCGTCCATCAA  
ACCGGATGCACTTTTTTCATGCGCTCTTGCCACTTATCCAACATTGTTTTCTGAATTCTT  
CCTCTGGGATGGAGTTGAAGAAGTTTTGAATTGCATTCTGGATTCGGTCTTCGATACGA  
ATCTTCGTCCGCGAAGCTCCTTTTTAAGCGTAGGAAACATCCAAAAATCACATGGAGCCA  
AGTCAGGGCTATAAGGGGGATGAGGGATTGTTTCAACTCCATTTTTACTCATAAATTCAC  
GTGTTAAGCTCGATGTGTGAGGCCGCGCATTGTCTTGATGGAGTATCCACGAAGCTTTCA  
AGTCCGACCGTTTCCGGGAAATGTGCATTCTCAACTCCTTTAGTACTTTGCAATAATACG  
CACTGTCAACTGTTGTGTTTGATGGTACAAAATGTTGATAAATGACACCTCGAAAATAAA  
AAACACAATAAGCATCACTTTATCGGCCGACTTTTCGATTTACGGCGATGAAGAATCTT  
CCTTAAAAACCGTAGGCGTAAACTTTCTCGCTGATTTCAAATTGCCATAACTCGGTCAA  
TTTTTATCCGATTGAGCTGATCTTGGTTTTAATCGATAGGTATTGAGTTGATCTTTAAAA  
TGAAATCAAGATCATGTCTGTATCTATCTTACTTTCGAAGTTACAGAACAAGTCCCGGTG  
CTTTTGGGACACCTTATGTA

>Btmar2.8.68\_gi-1092452725-gb-MAMS01001096\_1:-965764-966750  
gi-1092452725-gb-MAMS01001096.1:-965764-966750 Bemisia tabaci isolate MEAM1 Scaffold1294,  
whole genome shotgun sequence 987 bp

TACGTAGGGTGTCCCAAAAGTACCGGGACTGGTTCTGTAACCTCAAAAAGTAAGATAGATG  
CAGACATGATTTTGGTCTCATTTTAAAGATCAACTCAATACCTATCGATTTAAACCAAGA  
TCAGCTCAATCGAATAAAAATTGACCGAGTTATGACAATTTGAAATTAGTGAGGAAAGTT  
TACCCCTACGGTTTTTAGGAAGATTTTCGCTTACCAGGATTCAAAAAGTTAATATTCGT  
ATCCACTTTCCTCCGAATCTTCCATAACTTCCTTTTGCTTTTCAAAGTACCGTCCATCAA  
ACCGGATGCACTTTTTTCATGCGCTCTTGCCACTTATCCAACATTGTTTTCTGAATCCTT  
CCTCTGGGATGGAGTTGAAGAAGTTTTGAATTGCATTCTGGATTTTTGTCTTCGATACGA  
ATCTTCGTCCGCGAAGCTCCTTTTTAAGCGCAGGAAACATCCAAAAATCACATGGAGCCA  
AGTCAGGACTGTAAGGGGGATGAGGGATTGTTTCAACTCCATTTTTACTCATAAATTCAC  
GTGTTAAGCTCGATGTGTGAGGCCGCGCATTGTCTGAATCTTGATGGAGTATCCACGAA  
GCTTTCAAGTCCGACCGTTTCCGGGAAATGTGCATTCTCAACTCCTTTAGTACTTTGCAA  
TAATACGCACTGTCAACTGTTGTGTTTGATGGTACAAAATGTTGATAAATGACACCTCGA  
AAATAAAAAAACACAATAAGCATCACTTTATCGGCCGACTTTTCGATTTACGGCCATGAA

GAATCTTCCTTAAAAACCGTAGGCGTAACTTTCTCGCTGATTTCAAATTGCCATAACT  
CGGTCAATTTTTATCCGATTGAGCTGATCTTGGTTTTAATCGATAGGTATTGAGTTGATC  
TTTAAAATGAAATCAAGATCATGTCTGTATCTATCTTACTTTTGAAGTTACAGAACAAGT  
CCCGGTGCTTTTGGGACACCTTATGTA

--

>Btmar2.8.69\_gi-1092452725-gb-MAMS01001096\_1:-516268-516996  
gi-1092452725-gb-MAMS01001096.1:-516268-516996 Bemisia tabaci isolate MEAM1 Scaffold1294,  
whole genome shotgun sequence 729 bp

TACGTAGGGTGTCCCAAAAGTACCGGGACTGGTTCTGTAACCTCAAATTAAGATAGATA  
CAGACATGATTTTGGTCTCATTTTAAAGATCAACTCAATACCTATCGATTTAAACCAAGA  
TCAGCTCAATCGAATAAAAATTGACCGAGTTATGACAATTTGAAATTAGTGAGGAAAGTT  
TACCCCTACGGTTTTTAGGAAGATTTTCGCTTACCAGGATTTAAAAAGTTAATATTCGT  
ATCCACTTTCCTCCGAATCTTCCATAACTTCCTTTTGCTTTTCAAAGTACCGTCCATCAA  
ACCGGATGCACTTTTTCATGCGCTCTTGCCACTTATCCAACATTGTTTTCTGAATTATT  
CCTCTGGGATGGAGTTGAAGAAGTTTTGAATTGCATTCTGGATTTTCGGTCTTCGATACGA  
ATCTTCGTCCGCGAAGCTCCTTTTAAAGCGTGGGAAACATCCAAAAATCACATGGAGCCA  
AGTCAGGGCTATAAGGGGGATGAGGGATTGTTTCAACTCCATTTTACTCATAAATTCAC  
GTGTTAAGCTCGATGTGTGAGGCTGCGCATTGTTTTGATGGAGTATCCACGGAGCTTTCA  
AGTCCGACGGTTTCCGGGAAATGTGCATTCTCAACTCCTTTACTACTTTGCAATAATACG  
CACTGTCAACTGTTGTGTTTGATGGTACAAAATGTTGATAAATGACACCTCGAAAATAAA  
AAAACACAA

>Btmar2.8.70\_gi-1092452725-gb-MAMS01001096\_1:-383424-384075  
gi-1092452725-gb-MAMS01001096.1:-383424-384075 Bemisia tabaci isolate MEAM1 Scaffold1294,  
whole genome shotgun sequence 652 bp

CGTAGGGTGTCCCAAAAGTACCGGGACTGGTTCTGTAACCTCAAAGTAAGATAGATACA  
GACATGATTTTGGTCTCATTTTAAAGATCAACTCAATACCTATCGATTTAAACCAACATC  
AACTCAATCGGATAAAAATTGACCGAGTTATGACAATTTAAAATTAGTGAGGAAAGTTTA  
CCCCTACGGTTTTTAGGAAGATTTTCGCTTACCAGGATTCAAAAAGTTAATATTCGTAT  
CCACTTTCCTCCGAATCTTCCATAACTTCCTTTTGCTTTTCAAAGTACCGTCCATCAAAC  
CGGATGCACTTTTTCATGCGCTCTTGCCACTTATCCAACATTGTTTTCTGAATTCTTCC

TCTGGGATGGAGTTGAAAAAGTTTTGAATTGCGTTCTGGATTTCGGTCTTCGATACGAAT  
CTTCGTCCGCGAAGCTCCTTTTTAAGCGTAGGAAACATCCAAAAATCACATGGAGCCAAG  
TCAGGGCTATGAGGGGGATGAGGGATTGTTCAACTCCATTTTTACTCATAAATTCACGT  
GTAAAGCTCGATGTGTGAGGCCGCGCATTGTCTTGATGGAGTATCCACGAAGCTTTCAAG  
TCCGACCGTTTCCGGGAGATGTGCATTCTCAACTCCTTTAGCACTTTGCAAT

--

>Btmar2.8.71\_gi-1092453460-gb-MAMS01000794\_1:-937000-937979  
gi-1092453460-gb-MAMS01000794.1:-937000-937979 Bemisia tabaci isolate MEAM1 Scaffold1185,  
whole genome shotgun sequence 980 bp

TACGTAGGGTGTCCCAAAAGTACCGGGACTGGTTCTGTAACCTCAAAAGTAAGATAGATA  
CAGACATGATTTTGGTCTCATTTTAAAGATCAACTCAATACCTATCGATTAACCAAGA  
TCAGCTCAATCGAATAAAAATTGACCGAGTTATGACAATTTGAAATTAGTGAGGAAAGTT  
TACCCCTACGGTTTTTAGGAAGATTTTCGCTTACCAGGATTCAAAAAGTTAATATTCGT  
ATCCACTTTCCTCCGAATCTTCATAACTTCCTTTTGCTTTTCAAAGTACCGTCCATCAA  
ACCGGATGCACTTTTTCATGCGCTCTTGCCACTTATCCAACATTGTTTTCTGAATTCTT  
CCTCTGGGATGGAGTTGAAGAAGTTTTGAATTGCATTCTGGATTTCGGTCTTCGATACGA  
ATCTTCGTCCGCGAAGCTCCTTTTTAAGCGCAGGAAACATCCAAAAATCACATGGAGCCA  
AGTCAGGACTATAAGGGGGATGAGGGATTGTTCAACTCCATTTTTACTCATAAATTCAC  
GTGTTAAGCTCGATGTGTGAGGCCGCGCATTGTCTTGATGGAGTATCCACGAAGCTTTCA  
AGTCCGACCGTTTCCGGGAAATGTGCATTCTCAACTCCTTTAGCACTTTGCAATAATACG  
CACTGTCAACTGTTGTGTTTGATGGTACAAAATGTTGATAAATGACACCTCGAAAATAAA  
AAAACACAATAAGCATCACTTTATCGGCCGACTTTTCGATTTACGGCGATGAAGAATCTT  
CCTTAAAAACCGTAGGCGTAAACTTTCCTCGCTGATTTCAAATTGCCATAACTCGGTCAA  
TTTTTATCCGATTGAGCTGATCTTGTTTTAATCGATAGGTATTGAGTTGATCTTTAAAA  
TGAAATCAAGATCATGTCTGTATCTTACTTTTGAAGTTACAGAACAAGTCCCGGTG  
CTTTTGGGACACCTTATGTA

>Btmar2.8.72\_gi-1092453460-gb-MAMS01000794\_1:-1908669-1909649  
gi-1092453460-gb-MAMS01000794.1:-1908669-1909649 Bemisia tabaci isolate MEAM1 Scaffold1185,  
whole genome shotgun sequence 981 bp

TACGTAGGGTGTCCCAAAAGTACCGGGACTGGTTCTGTAACCTCAAAAGTAAGATAGATA  
CAGACATGATTTTGGTTTCATTTTAAAGATCAACTCAATACCTATCGATTAACCAAGA  
TCAGCTCAATCGAATAAAAATTGACCGAGTTATGACAATTTGAAATCAGTGAGGAAAGTT  
TACCCCTACGGTTTTTAGGAAGATTTTCCCTTACCAGAATTCAAAAAGTTAATATTCGT  
ATCCACTTTCCTCCGAATCTTCATAACTTCCTTTTGCTTTTCAAAGTACCGTCCATCAA  
ACCGGATGCACTTTTTCATGCGCTCTTGCCACTTATCCAACATTGTTTTCTGAATTCTT  
CCTCTGGGATGGAGTTGAAGAAGTTTTGAATTGCATTCTGGATTTTGTCTTCGATACGA  
ATCTTCGTCCGCGAAGCTCCTTTTAAAGCGCAGGAAACATCCAAAAATCACATGGAGCCA  
AGTCAGGACTATAAGAGGGGATGAGGGATTGTTTCAACTCCATTTTACTCATAAATTCAC  
GTGTTAAGCTCGATGTGTGAGGCCGCGCATTGTCTTGATGGAGTATCCACGAAGCTTTCA  
AGTCCGACCGTTTCCGGGAAATGTGCATTCTCAACTCCTTTAGTACTTTGCAATAATACG  
CACTGTCAACTGTTGTGTTTGATGGTACAAAATGTTGATAAATGACACCTCGAAAATGAA  
AAAAACACAATAAGCATCACTTTATCGGCCGACTTTTCGATTTACGGCGATGAAGAATCT  
TCCTTAAAAACCGTAGGCGTAACTTTCTCGCTGATTTCAAATTGCCATAACTCGGTCA  
ATTTTTATCCGATTGAGCTGATCTTGGTTTTAATCGATAGGTATTGAGTTGATCTTTAAA  
ATGAAATCAAGATCATGTCTGTATCTATCTTACTTTCGAAGTTACAGAACAAGTCCCGGT  
GCTTTTGGGACACCTTATGTA

--

>Btmar2.8.73\_gi-1092454689-gb-MAMS01000243\_1-:1027460-1028435  
gi-1092454689-gb-MAMS01000243.1-:1027460-1028435 Bemisia tabaci isolate MEAM1 Scaffold73,  
whole genome shotgun sequence 976 bp

TACGTAGGGTGTCCCAAAAGTACCGGGACTGGTTCTGTAACCTCAAAAGTAAGATAGATA  
CAGATATGATTTTGGTCTCATTTTATAGATTAACCTCAATACCTATCGATTAACCAAAA  
TCAGCTCAATCAAATAAAAATTGACCGAGTTATGACAATTTGAAATTAGTGAGGAAAACC  
CCTACGGTTTTTACGAAGATTTTTCGCTTACCAGGATTCAAAAAGTTAATATTCGTATCC  
ACTTTCCTCCGAATCTTCATAACTTCCTTTTGCTTTTCAAAGTACCGTCCATCAAACCG  
GATGCACTTTTTCATGCGCTCTTGCCACTTATCCAACATTGTTTTCTGAATTCTTCCTC  
TGGGATGGAGTTGAAGAAGTTTTGAATTGCATTCTGGATTTCTCGATACGAATCT  
TCGTCCGCGAAGCTCCTTTTAAAGCGTAGGAAACATCCAAAAATCACATGGAGCCAAGTC  
AGGGCTATAAGGGGGATGAGGGATTGTTTCAACTCCATTTTACTCATAAATTCACGTGT

TAAGCTCTATGTGTGAGGCCGCGCATTGTCTTGATGGAGTATCCACGAAGCTTTCAAGTC  
CGACCGTTTCCGGGAAATGTGCATTCTCAACTCCTTTAGTACTTTGCAATAATACGCACT  
GTCAACTGTTGTGTTTGATGGTACAAAATGTTGATAAATGACACCTCGAAAATAAAAAA  
CAGAATAAGCATCACTTTATCGGCCGACTTTTCGATTACGGCGATGAAGAATCTTCCTT  
AAAAACCGAAAGCGTAACTTTCTCGCTGATTTCAAATTGCCATAACTCGGTCAATTTT  
TATCCGATTGAGCTGATCTTGGTTTTAATCGATAGGTATTGAGTTGATCTTTAAATGAG  
ATCAAGATCATGTCTGTATCTATCTTACTTTTGAAGTTACAGAACAAGTCCCGGTGCTTT  
TGGGACACCTTATGTA

--

>Btmar2.8.74\_gi-1092454896-gb-MAMS01000189\_1-:809635-810614  
gi-1092454896-gb-MAMS01000189.1-:809635-810614 Bemisia tabaci isolate MEAM1 Scaffold597, whole  
genome shotgun sequence 980 bp

TACGTAGGGTGTCCAAAAGTACCGGGACTGGTTCTGTAAGTAAATAGATA  
CAGACATGATTTTGGTCTCATTTTAAAGATCAACTCAATACCTATCGATTAACCAAGA  
TCAGCTCAATCGAATAAAAATTGACCGAGTCATTACAATTTGAAATTAGTGAGGAAAGTT  
TACCCCTACGGTTTTTAGGAAGATTGTTGCTTACCAGGATTCAAAAAGTTAATATTCGT  
ATCCACTTTCCTCCGAATCTTCCATAACTTCCTTTTGCTTTTCAAAGTACCGTCCATAAA  
ACCGGATGCACTTTTTCATGCGTTCTTGCCACTTATCCAACATTGTTTCTGAATTCTT  
CCTCTGGGATGGAGTTGAAGAAGTTTTGAATTGCATTCTGGATTTCGGTCTTCGATACGA  
ATCTTCGTCCGCTAAGCTCCTTTTAAAGCGTAGGAAACATCCAAAATCACATGGAGCCA  
AGTCAGGGCTATAAGGGGGATGAGGGATTGTTTCAACTCCATTTTACTCATAAATTCAC  
GTGTTAAGCTCGATGTGTGAGGCCGCGCATTGTCTTGATGGAGTATCCACGAAGCTTTCA  
AGTCCGACCGTTTCTGGGAAATGTGCATTCTCAACTCCTTTAGCACTTTGCAATAATACG  
CACTGTCAACTGTTGTGTTTGATGGTACAAAATGCTGATAAATGACACCTCGAAAATAAA  
AAACACAATAAGCATCACTTTATGGGCCGACTTTTCGATTACGGCGATGAAGAATCTT  
CCTTAAAACTATAGGCGTAACTTTCTCGCTGATTTCAAATTGCCATAACTCGGTCAA  
TTTTATCCGATTGAGCTGATCTTGGTTTTAATCGATAGGTATTGAGTTGATCTTTAAAA  
TGAAATCAAGATCATGTCTGTATCTATCTTACTTTTGAAGTTACAGAACAAGTCCCGGTG  
CTTTTGGGACACCTTATGTA

>Btmar2.8.75\_gi-1092454896-gb-MAMS01000189\_1-:1523232-1524214  
gi-1092454896-gb-MAMS01000189.1-:1523232-1524214 Bemisia tabaci isolate MEAM1 Scaffold597,  
whole genome shotgun sequence 983 bp

TACGTAGGGTGTCCCAAAAGTACCGGGATTGGTTCTGTAACCTCAAAAGTAAGATAGATA  
CAGACATGATTTTGGTCTCATTTTAAAGATCAACTCAATACCTATCAATTAACCAAGA  
TCAGCTCAATCGAATAAAAATTGACCGAGTTATGACAATTTGAAATTAGTGAGGAAAGTT  
TACCCCTACGGTTTTTAGGAAGATTTTCGCTTACCAGGATTCAAAAAGTTAATATTCCT  
ATCCACTTTCCTCCGAATCTTCCATAACTTCCTTTTGCTTTTCAAAGTACCGTCCATCAA  
ACCGGATGCACTTTTTCATGCGCTCTTGCCACTTATCCAACATTGTTTTCTGAATTCTT  
CCTCTGGGATGGAGTTGAAGAAGTTTTGAATTGCATTCTGGATTCGGTCTTCGATACGA  
ATCTTCGTCCGCGAAGCTCCTTTTAAAGCGTAGGAAACATCCAAAAATCACATGGAGCCA  
AGTCAGGGCTATAAGGGGGGTGAGGGATTGTTCAACTCCATTTTACTCATAAATTCAC  
GTGTTAAGCTCGATGTGTGAGGCCGCGCTTGCTTGATGGAGTATCCACGAAGCTTTCAA  
GTCCGACCGTTTTCCGGGAAATGTGCATTCTCAACTCCTTTAGCACTTTGCAATAATACGC  
ACTCTTAACTGTTGTGTTTGGTGGTACAAAATGTTGATACTTAAATGACACCTCGAAAAT  
AAAATAACACAATAAGCATCACTTTATCGGCCGACTTTTCGATTTACGGCGATGAAGAAT  
CTTCCTTAAAAACCGTAGGCGTAACTTTCCTCGCTGATTTCAAATTGCCATAACTCGGT  
CAATTTTATTGATTGAGCTGATTTTGGTTTTAATCGATAGGTATTGAGTTGATCTTTA  
AAATGAAATCAAGATCATGTCTGTATCTATCTTACTTTCGAAGTTACAAAACAAGTCCCG  
GTGCTTTTGGGACACCTTATGTA

>Btmar2.8.76\_gi-1092454896-gb-MAMS01000189\_1-:18350-19331  
gi-1092454896-gb-MAMS01000189.1-:18350-19331 Bemisia tabaci isolate MEAM1 Scaffold597, whole  
genome shotgun sequence 982 bp

TACATAGGGTGTCTAAAAGTACCGGGACTGGTTCTGTAACCTCAAAAGTAAGATATATA  
CAAACATGATCTTGGTTTCATTTTAAAGATCAACTCAATACCTATCGATTAAGACCAAGA  
TCAGCTCAATCGAATAAAAATTGATCGAGTTATGGCAATTTGAAATCAGCGAAGAAAGTT  
TACCCCTACGGTTTTTTAGGAAGATTTTCGCTCACCAGGATTCAAAAATTAATATTCG  
TATCCGCTTTCCTCCGAATCTTCCATAGCTTCCTTTTGCAATTCAAAGTACCGTCCATCA  
AACCTGATGCACTTTTTCATGCGCTCTTGCCACTTATCCAACATTGTATTCCTGAATTCT  
TCCTCTGGGATGGAGTTGAAGAAGTTTTGAACTGCATTCTGGATTCGGTCTTCGATTTCG

AATCTTCGTCCGCGAAGCTCCTTTTAAAGCGTAGGAAAAATCCAAAAATCACATGGAGCC  
AAGCCAGGGCTATAAGGGGGATGAGGGATTGTTTCAACTCCATTTTACTCATAAATTCA  
CGTGTTAAGTTCGATGTGTGAGGCCGCGCATTCTCTTGATGGGGTATCCACGAAGCTTTC  
AAGTCCGGCAGTTTCCGGGAGATGTGCATTCTCAACTCCTTTAGGACTTTGCAATAACAC  
GCACTGTCAATTGTTGTGTTTGGTGGTACAAAATGTTGATAAATGACACCTCGAAAAAA  
AAAAACACAACAAGCATCACTTTCAGGCCGATTTTTCGATTACGGCGATGAAGAATCT  
TCCTAAAAAAACCGTAGGGGTAACTTTCCTCACCAATTTCAAATTGCTATAACTCGGTC  
AATTTTTATTGATTGAGCTGATCTTGGTCTTAATCGATAAGTATTGAGTTGATCTTTAA  
AATGAGACCAAGATCATGTTTGTATCTATCTTACTTTGAAGTTACAGAACCAGTCCCGG  
TACTTTTGGGACACCCTATGTA

>Btmar2.8.77\_gi-1092454896-gb-MAMS01000189\_1-:465216-465930  
gi-1092454896-gb-MAMS01000189.1-:465216-465930 Bemisia tabaci isolate MEAM1 Scaffold597, whole  
genome shotgun sequence 715 bp

TACGTAGGGTGTCCCAAAAGTACCGAGACTGGTTCTGTAACCTCAAAGTAAGATAGATG  
CAGACATGATTTTGGTCTCATTTTAAAGATCAACTCAATACCTATCGATTAACCAAGA  
TCAGCTCAATGGAATAAAAAATTGACCGAGTTATGACAATTTGAAATTAGTGAGGAAAGTT  
TACCCCTACGGTTTTTAGGAAGATTTTCGCTTACCAGCATTCAAAAAGTTAATATTCGT  
ATCCACTTTCCTCCGAATCTTCATAACTTCCTTTTGCTTTTCAAAGTACCGTCCATCAA  
ACCGGATGCACTTTTTCATGCGCTCTTGCCACTTATCCAACATTGTTTTCTGAATTCTT  
CCTCTGGGATGGAGTTGAAGAAGTTTTGAATTGCATTCTGGATTTCGGTCTTCGATACGA  
AGCTCCTTTTAAAGCGTGGGAAACATCCAAAAATCACATGGAGCCAAGTCAGCGCTATAA  
GGGGGATGCGGGATTGTTTCAACTCCATTTTACTCATAAATTCACGTGTTAAGCTCGAT  
GTGTGAGGCTGCGCATTGTTTTGATGGAGTATCCACGGAGCTTTCAAGTCCGACCGTTTC  
CGGGAAATGTGCATTCTCAACTCCTTTAGTACTTTGCAATAATACGCACTGTCAACTGTT  
GTGTTTGATGGTACAAAATGTTGATAAATGACACCTCGAAAATAAAAAACACAA

--

>Btmar2.8.78\_gi-1092455188-gb-MAMS01000105\_1-:1447127-1448106  
gi-1092455188-gb-MAMS01000105.1-:1447127-1448106 Bemisia tabaci isolate MEAM1 Scaffold343,  
whole genome shotgun sequence 980 bp



TACGTAGGGTGTCCCAAAAGTACCGGGACTGGTTCTGTAACCTCAAAAGTAAGATAGATG  
CAGACATGATTTTGGTCTCATTTTAAAGATCAACTCAATACCTATCGATTAACCAAGA  
TCAGCTCAATCGAATAAAAATTGACTGAGTTATGACAATTTGAAATTAGTGAGGAAAGTT  
TACCCCTACGGTTTTTAGGAAGATTTTCGCTTACCAGGATTCAAAAAGTTAATATTCGT  
ATCCACTTTCCTCCGAATCTTCCATAACTTCCTTTTGCTTTCAAAGTACCGTCCATCAA  
ACCGGATGCACTTTTTCATGCGCTCTTGCCACTTATCCAACATTGTTTTCTGAATTCTT  
CCTCTGGGATGGAGTTGAAGAAGTTTTGAATTGCATTCTGGATTTTGTCTTCGATACGA  
ATCTTCGTCCGCGAAGCTCCTTTTAAAGCGCAGGAAACATCCAAAAATCACATGGAGCCA  
AGTCAGGGCTATAAGGGGGATGAGGGATTGTTCAACTCCATTTTACTCATAAATTCAC  
GTGTTAAGCTCGATGTGTGAGGCCGCGCATTGTCTTGATGGAGTATCCACGAAGCTTCA  
AGTCCGACCGTTTCCGGGAAATGTGCATTCTCAACTCCTTTAGTACTTTGCAATAATACG  
CACTGTCAACTGTTGTGTTTGATGGTACAAAATGTTGATAAATGACACCTCGAAAATAAA  
AAAACACAATAAGCATCACTTTATCGGCCGACTTTTCGATTTACGGCGATGAAGAATCTT  
CCTTAAATCCGTAGGCGTAACTTTCTCGCTGATTTCAAATTGCCATAACTCGGTCAA  
TTTTATCCGATTGAGCTGATCTTGGTTTTAATCGATAGGTATTGAGTTGATCTTAAAA  
TGAAATCAAGATCATGTCTGTATCTATCTTACTTTCGAAGTTACAGAACAAGTCCCGGTG  
CTTTGGGACACCTTATGTA

--

>Btmar2.8.79\_gi-1092455188-gb-MAMS01000105\_1-:4581984-4582963  
gi-1092455188-gb-MAMS01000105.1-:4581984-4582963 Bemisia tabaci isolate MEAM1 Scaffold343,  
whole genome shotgun sequence 980 bp

TACGTAGGGTGTCCCAAAAGTACCGGGACTGGTTCTGTAACCTCAAAAGTAAGATAGATA  
CAGACATGATTTTGGTCTCATTTTAAAGATCAACTCAATACCTATCGATTAACCAAGA  
CCAGCTCAATCGGATAAAAATTGACCGAGTTATGACAATTTGAAATTAGTGAGGAAAGTT  
TACCCCTACGGTTTTTAGGAAGATTTTCGCTTACCAGGATTCAAAAAGTTAATATTCGT  
ATCCACTTTCCTCCGAATCTTCCATAACTTCCTTTTGCTTTCAAAGTACCGTCCATCAA  
ACCGGATGCACTTTTTCATGCGCTCTTGCCACTTATCCAACATTGTTTTCTGAATTCTT  
CCTCTGGGATGGCGTTGAAAAAGTTTTGAATTGCATTCTGGATTTTCGGTCTTCGATTCTGA  
ATCTTCGTCCACGAAGCTCCTTTTAAAGTGTAGGAAACATCCAAAAATAACATGGAGCCA  
AGTCAGGGCTGTAAGGGGGATGAGGGATTGTTCAACTCCATTTTACTCATAAATTCAC

GTGTTAAGCTCGATGTGTGAGGCCGCGCTTGTCTTGATGGAGTATCCACGGAGCTTTCAA  
GTCCGACCGTTTCCGGGAAATGTGCATTCTCAACTCCTTTAGCACTTTGCAATAATACGC  
ACTGTCAACTGTTGTGTTTGGTGGTACAAAATGTTGATAAATGACACCTCGAAAATGAAA  
AAAACACAATAAGCATCACTTTATAGGCCGACTTTTCGATTACGGCGATGAAGAATCTT  
CCTTAAAAACCGTAGGCGTAACTTTCTCGCTGATTTCAAATTGCCATAACTTGGTCAA  
TTTTTATCCGATTGAGCTGATATTGGTTTTAATCGATAGGTATTGAGTTGATCTTTAAAA  
TGAGATCAAGATCATGTCTGTATCCATCTTACTTTGAAGTTACAGAACAAGTCCCGGTG  
CTTTTGGGACACCTTTTGTA

--

>Btmar2.8.80\_gi-1092455225-gb-MAMS01000096\_1:652321-653302  
gi-1092455225-gb-MAMS01000096.1:652321-653302 Bemisia tabaci isolate MEAM1 Scaffold322, whole  
genome shotgun sequence 982 bp

TACGTAGGGTGTCCAAAAGTACCGGGACTGGTTCTGTAACCTCAAAGTAAGATAGATG  
CAGACATGATTTTGGTCTCATTTTAAAGATCAACTCAATACCTATCGATTAACCAAGA  
TCAGCTCAATGAAATAAAAATTGACCGAGTTATGACAATTGAAATTAGTGAGGAAAGTT  
TACCCCTACGGTTTTTAGGAAGATTTTTTGCTTACCAGCATTCAAAAAGTTAATATTCGT  
ATCCACTTTTCTCCGAATCTTCCATAACTTCCTTTTGCTTTTCAAAGTACCGTCCATCAA  
ACCGGATGCACTTTTTCATGCGCTCTTGCCACTTATCCAACATTGTTTTCTGAATTCTT  
CCTCTGGGATGGAGTTGAAGAAGTATTTGAATTGCATTCTGGATTTCGGTCTTCGATAC  
GAATCTTCGTCCGCGAAGCTCCTTTTTAACCGTAGGAAACATCCAAAAATCACATGGAGC  
CAAGTCAGGGCTATAAGGGGGATGAGGGATTGTTCAACTCCATTTTACTCATAAATTC  
ACGTGTTAAGCTCGATGTGTGAGGCCGCGCATTGTCTTGATGGAGTATCCACGAAGCTTT  
CAAGTCCGACCGTTTCCGGGAAATGTGCATTCTCAACTCCTTTAGTACTTTGCAATAATA  
CGCACTGTCAACTGTTGTGTTTGTGTTGATGGTACAAAATGTTGATAAATGACACCTCGAAAATA  
AAAAACACAATAAGCATCACTTTATCGGCCGACTTTTCGATTACGGCGATGAAGAATC  
TTCCTTAAAAACCGTAGGCGTAACTTTCTCGCTGATTTCAAATTGCCATAACTCGGTC  
AATTTTTATCCGATTGAGCTGATCTTGGTTTTAATCGATAGGTATTGAGTTGATCTTTAA  
AATGAAATCAAGATCATGTCTGTATCTATCTTACTTTGAAGTTACAGAACAAGTCCCGG  
TGCTTTTGGGACACCTTACGTA

--

>Btmar2.8.81\_gi-1092455237-gb-MAMS01000094\_1:-5138499-5139479  
gi-1092455237-gb-MAMS01000094.1:-5138499-5139479 Bemisia tabaci isolate MEAM1 Scaffold320,  
whole genome shotgun sequence 981 bp

TACGTAGGGTGTCCCAAAAGTACCGGGACTGGTTCTGTAACCTCAAAGTAAGATAGATA  
CAGACATGATTTTGGTCTCATTTTGAAGATCAACTCAATACCTATCGATTAAAACCAAGA  
TCAGCTCAATCGAATAAAAAATTGACCGAGTTATGACAATTTGAAATTAGTGAGGAAAGTT  
TACCCCTACGGTTTTTAGGAAGATTTTCGCTTACCAGGATTCAAAAAGTTAATATTCGT  
ATCCACTTTCCTCCGAATCTTCCATAACTTCCTTTTGCTTTTCAAAGTACCGTCCATCAA  
ACCGGATGCACTTTTTCATGCGCTCTTGCCACTTATCCAACATTGTTTTCTGAATTCTT  
CCTCTGGGATGGAGTTGAAGAAGTTTTGAATTGCATTCTGGATTTTGTCTTCGATACGA  
ATCTTCGTCCGCGAAGCTCCTTTTAAAGCGTAGGAAACATCCAAAAATCACATGGAGCCA  
AGTCGGGGCTATAAGGGGGATGAGGGATTGTTTCAACTCCATAGTTACTCATAAATTCAC  
GTGTTAAGCTCGATGTGTGAGGCCGCGCATTGTCTTGATGGAGTATCCACGAAGCTTTCA  
AGTCCGACCGTTTCCGGGAAATGTGCATTCTCAACTCCTTTAGTACTTTGCAATAATACG  
CACTGTCAACTGTTGTGTTTGATGGTACAAATTGTTGATAAATGACACCTCGAAAAATAAA  
AAAAACACAATAAGCATCACTTTATCGGCCGACTTTTCGATTTACGGCGATGAAGAATCT  
TCCTTAAAAACCGTAGGCGTAACTTTCCTCGCTGATTTCAAATTGCCATAACTCGGTCA  
ATTTTATCCGATTGAGCTGATCTTGGTTATAATCGATGGGTATTGAGTTGATCTTTAAA  
ATGAGATCAAGATCATGTCTGTATCTATCTTACTTTCGAAGTTACAGAACAAGTCCCGGT  
GCTTTTGGGACACCTTATGTA

>Btmar2.8.82\_gi-1092455237-gb-MAMS01000094\_1:-1750327-1751301  
gi-1092455237-gb-MAMS01000094.1:-1750327-1751301 Bemisia tabaci isolate MEAM1 Scaffold320,  
whole genome shotgun sequence 975 bp

TACGTAGGGTGTCCCAAAAGTACCGGGACTGGTTCTGTAACCTCAAAGTAAGATAGATA  
CAGACATGATTTTGGTCTCATTTTAAAGATCAACTCAATACCTATCGATTAAAACCAAGA  
TCAGCTCAATCGGATAAAAAATTGACCGAGTTATGACAATTTGAAATTAGTGAGGAAAGTT  
TACCCCTACGGTTTTTAGGAAGATTTTCGCTTACCAGGATTCAAAAAGTTAATATTCGT  
ATCCACTTTCCTCCGAATCTTCCATAACTTCCTTTTGCTTTTCAAAGTACCGTCCATCAA  
ACCGGATGCACTTTTTCATGCGCTCTTGCCACTTATCCAACATTGTTTTCTGAATTCTT

CCTCTGGGATGGCGTTGAAAAAGTTTTGAATTGCATTCTGGATTTCGGTCTTCGATTCGA  
ATCTTCGTCCACGAAGCTCCTTTTTAAGTGTAGGAAACATCCAAAAATCACATGGAGCCA  
AGTCAGGGCTGTAAGGGGGATGAGGGATTGTTCAACTCCATTTTTACTCATAAATTCAC  
GTGTTAAGCTCGATGTGTGAGGCCGCGCTTGCTTGATGGAGTATCCACGAAGCTTTCAA  
GTCCGACCGTTTTCCGGGAAATGTGCATTCTCAACTCCTTTAGCACTTTGCAATAATACGC  
ACTGTCAACTGTTGTGTTTGGTGGTACAAAATGTTGATAAATGACACCTCGAAAATGAAA  
AAAACACAATAAGCATCACTTTATAGGCCGACTTTTCGATTTACGGCGATGAAGAATCTT  
CCTTAAAAACCGTAGGCGTAAACTTTCTCGCTGATTTCAAAGTGCCATAACTTGGTCAA  
TTTTTATCCGATTGAGCTGATCTTGAGTTAATCGATAGGTATTGAGTTGATATTTAAAA  
TGAGATCAAGATCATGTCTGTATCCATCTTACTTTCGAAGTTACAGAACAAGTCCCGGTG  
CTTTTGGGACACCTT

--

>Btmar2.8.83\_gi-1092455237-gb-MAMS01000094\_1-:4117751-4118480  
gi-1092455237-gb-MAMS01000094.1-:4117751-4118480 Bemisia tabaci isolate MEAM1 Scaffold320,  
whole genome shotgun sequence 730 bp

TACGTAGGGTGTCCCAAAAGTACCGGGACTGGTTCTGTAACCTCAAATTAAGATAGATA  
CAGACATGATTTTGGTTTCATTTTAAAGATCAACTCAATACCTATCGATTAAAACCAAGA  
TCAGCTCAATCGAATAAAAATTGACCGAGTTATGACAATTTGAAATTAGTGAGGAAAGTT  
TACCCCTACGGTTTTTAGGAAGATTTTCACTTACCAGGATTTAAAAAGTTAATATTCGT  
ATCCACTTTCCTCCGAATCTTCCATAACTTCCTTTTGCTTTTCAAAGTACCGTCCATCAA  
ACCGGATGCACTTTTTCATGCGCTCTTGCCACTTATCCAACATTGTTTTCTGAATTATT  
CCTCTGGGATGGAGTTGAAGAAGTTTTGAATTGCATTCTGGATTTCGGTCTTCGATACGA  
ATCTTCGTCCGCGAAGCTCCTTTTTAAGCGTGGGAAACATCCAAAAATCACATGGAGCCA  
AGTCAGCGCTATAAGGGGGATGAGGGATTGTTCAACTCCATTTTTACTCATAAATTCAC  
GTGTTAAGCTCGATGTGTGAGGCTGCGCATTGTTTTGATGGAGTATCCACGGAGCTTTCA  
AGTCCGACGGTTTCCGGGAAATGTGCATTCTCAACTCCTTTACTACTTTGCAATAATACG  
CACTGTCAACTGTTGTGTTTGATGGTACAAAATGTTGATAAATGACACCTCGAAAATAAA  
AAAAACACAA

--

>Btmar2.8.84\_gi-1092428471-gb-MAMS01017067\_1-:2946017-2946745  
gi-1092428471-gb-MAMS01017067.1-:2946017-2946745 Bemisia tabaci isolate MEAM1 Scaffold811,  
whole genome shotgun sequence 729 bp

TACGTAGGGTGTCCCAAAAGTACCGGGACTGGTTCTGTAACCTCAAATTAAGATAGATA  
CAGACATGATTTTGGTCTCATTTTAAAGATCAACTCAATACCTATCGATTAAAACCAAGA  
TCAGCTCAATCGAATAAAAATTGACCGAGTTATGACAATTTGAAATTAGTGAGGAAAGTT  
TACCCCTACGGTTTTTAGGAAGATTTTCGCTTACCAGGATTTAAAAAGTTAATATTCGT  
ATCCACTTTCCTCCGAATCTTCCATAACTTCCTTTTGCTTTTCAAAGTACCGTCCATCAA  
ACCGGATGCACTTTTTCATGCGCTCTTGCCACTTATCCAACATTGTTTTCTGAATTCTT  
CCTCTGGGATGGAGTTGAAGAAGTTTTGAATTGCATTCTGGATTCGGTCTTCGATACGA  
ATCTTCGTCCGCGAAGCTCCTTTTAAAGCGTGGGAAACATCCAAAAATCACATGGAGCCA  
AGTCAGCGCTATAAGGGGGATGAGGGATTGTTTCAACTCCATTTTACTCATAAATTCAC  
GTGTTAAGCTCGATGTGTGAGGCTGCGCATTGTTTTGATGGAGTATCCACGGAGCTTTCA  
AGTCCGACGGTTTCCGGGAAATGTGCATTCTCAACTCCTTTACTACTTTGCAATAATACG  
CACTGTCAACTGTTGTGTTTCGATGGTACAAAATGTTGATAAATGACACCTCGAAAATAAA  
AAAACACAA

--

>Btmar2.8.85\_gi-1092446717-gb-MAMS01003828\_1-:1604988-1605967  
gi-1092446717-gb-MAMS01003828.1-:1604988-1605967 Bemisia tabaci isolate MEAM1 Scaffold2363,  
whole genome shotgun sequence 980 bp

TACGTAGGGTGTCCCAAAAGTACCGGGACTGGTTCTGTAACCTCAAAGTAAGATAGATG  
CAGACATGATTTTGGTCTCATTTTAAAGATCAACTCAATACCTATCGATTAAAACCAAGA  
TCAGCTCAATCGAATAAAAATTGACCGAGTTATGACAATTTGAAATTAGTGAGGAAAGTT  
TACCCCTACGGTTTTTAGGAAGATTTTCGCTTACCAGGATTCAAAAAGTTAATATTCGT  
ATCCACTTTCCTCCGAATCTTCCATAACTTCCTTTTGCTTTTCAAAGTACCGTCCATCAA  
ACCGGATGCACTTTTTCATGCGCTCTTGCCACTTATCCAACATTGTTTTCTGAATTCTT  
CCTCTGGGATGGAGTTGAAGAAGTTTTGAATTGCATTCTGGATTCGGTCTTCGATACGA  
ATCTTCGTCCGCGAAGCTCCTTTTAAAGCGCAGGAAACATCCAAAAATCACATGGAGCCA  
AGTCAGGGCTATAAGGGGGATGAGGGATTGTTTCAACTCCATTTTACTCATAAATTCAC  
GTGTTAAGCTCGATGTGTGAGGCCGCGCATTGTCTTGATGGAGTATCCACGAAGCTTTCA

AGTCCGACCCTTTCCGGGAAATGTGCATTCTCAACTCCTTTAGTACTTTGCAATAATACG  
CACTGTCAACTGTTGTGTTTGATGGTACAAAATGTTGATAAATGACACCTCGAAAATAAA  
AAAACACAATAAGCATCACTTTATCGGCCGACTTTTCGATTTACGGCGATGAAGAATCTT  
CCTTAAAAACCGTAGGCGTAAACTTTCTCGCTGATTTCAAATTGCCATAACTCGGTCAA  
TTTTATCCGATTGAGCTGATCTTGGTTTTAATCGATAGGTATTGAGTTGATCTTTAAAA  
TGAAATCAAGATTATGTCTGTATCTATCTTACTTTCGAAGTTACAGAACAAGTCCCGGTG  
CTTTGGGACACCTTATGTA

--

>Btmar2.8.86\_gi-1092450808-gb-MAMS01001998\_1-:226631-227610  
gi-1092450808-gb-MAMS01001998.1-:226631-227610 Bemisia tabaci isolate MEAM1 Scaffold1647,  
whole genome shotgun sequence 980 bp

TACGTAGGGTGTCCCAAAAGTACCGGGACTGGTTCTGTAACCTCAAAGTAAGATAGATA  
CAGACATGATTTTGGTCTCATTTTAAAGATCAACTCAATACCTATCGATTAAAACCAAGA  
TCAGCTCAATCGAATAAAAATTGACCGAGTTATGACAATTTGAAATTAGTGAGGAAAGTT  
TACCCCTACGGTTTTTAGGAAGATTTTCGCTTACCAGGATTCAAAAAGTTAATATTCGT  
ATCCACTTTCCTCCGAATCTTCCATAACTTCCTTTTGCTTTTCAAAGTACCGTCCATCAA  
ACCGGATGCACTTTTTCATGCGCTCTTGCCACTTATCCAACATTGTTTTCTGAATTCTT  
CCTCTGGGATGGAGTTGAAGAAGTTTTGAATTGCATTCTGGATTTCGGTCTTCGATACGA  
ATCTTCGTCCGCGAAGCTCCTTTTAAAGCGTAGGAAACATCCAAAAATCACATGGAGCCA  
AGTCAGGGCTATAAGGGGGATGAGGGATTGTTTCAACTCCATTTTACTCATAAATTCAC  
GTGTTAAGCTCGATGTGTGAGGCCGCGCATTGTCTTGATGGAGTATCCACGAAGCTTTCA  
AGTCCGACCGTTTCCGGGAAATGTGCATTCTCAACTCCTTTAGTACTTTGCAATAATACG  
CACTGTCAACTGTTGTGTTTGATGGTACAAAATGTTGATAAATGACACCTCGAAAATAAA  
AAAACACAATAAGCATCACTTTATCGGCCGACTTTTCGATTTACGGCGATGAAGAATCTT  
CCTTAAAAACCGTAGGCGTAAACTTTCTCGCTGATTTCAAATTGCCATAACTCGGTCAA  
TTTTATGCGATTGAGCTGATCTTGGTTTGAATCGATAGGTATTGAGTTGATCTTTAAAA  
TGAAATCAAGATCATGTCTGTATCTATCTTACTTTCGAAGTTACAGAACAAGTCCCGGTG  
CTTTGGGACACCTTATGTA

>Btmar2.8.87\_gi-1092450808-gb-MAMS01001998\_1-:48859-49587  
gi-1092450808-gb-MAMS01001998.1-:48859-49587 Bemisia tabaci isolate MEAM1 Scaffold1647, whole  
genome shotgun sequence 729 bp

TACGTAGGGTGTCCCAAAAGTACCGGGACTGGTTCTGTAACCTCAAATTAAGATAGATA  
CAGACATGATTTTGGTCTCATTTTAAAGATCAACTCAATACCTATCGATTAAAACCAAGA  
TCAGCTCAATCGGATAAAAATTGACCGAGTTATGACAATTTGAAATTAGTGAGGAAAGTT  
TACCCCTACGGTTTTTAGGAAGATTTTCGCTTACCAGGATTTAAAAAGTTAATATTCGT  
ATCCACTTTCCTCCGAATCTTCCATAACTTCCTTTTGCTTTTCAAAGTACCGTCCATCAA  
ACCGGATGCACTTTTTCATGCGCTCTTGCCACTTATCCAACATTGTTTTCTGAATTATT  
CCTCTGGGATGGAGTTGAAGAAGTTTTGAATTGCATTCTGGATTTTCGGTCTTCGATACGA  
ATCTTCGTCCGCGAAGCTCCTTTTAAAGCGTGGGAAACATCCAAAAATCACATGGAGCCA  
AGTCAGCGCTATAAGGGGGATGAGGGATTGTTTCAACTCCATTTTACTCATAAATTCAC  
GTGTTAAGCTCGATGTGTGAGGCTGCGCATTGTTTTGATGGAGTATCCACGGAGCTTTCA  
AGTCCGACGGTTTCCGGGAAATGTGCATTCTCAACTCCTTTACTACTTTGCAATAATACG  
CACTGTCAACTGTTGTGTTTGATGGTACAAAATGTTGATAAATGACACCTCGAAAATAAA  
AAAACACAA

--

>Btmar2.8.88\_gi-1092455056-gb-MAMS01000145\_1-:64753-65733  
gi-1092455056-gb-MAMS01000145.1-:64753-65733 Bemisia tabaci isolate MEAM1 Scaffold471, whole  
genome shotgun sequence 981 bp

TACGTAGGGTGTCCCAAAAGTACCGGGACTGGTTCTGTAACCTCAAAGTAAGATAGATA  
CAGACATGATTTTGGTTTCATTTTAAAGATCAACTCAATACCTATCGATTAAAATCAAGA  
TCAGCTCAATCGGATAAAAACTGACCGAGTTATGACAATTTGAAATTAGTGAGGAAAGTT  
TACCCCTACGGTTTTTAGGAAGATTTTCGATTACCAGGATTCAAAAGTTAATATTCGT  
ATCCACTTTCCTCCGAATCTTCCATAACTTCCTTTTGCTTTTCAAAGTACCGTCCATCAA  
ACCGGATGCACTTTTTCATGCGCTCTTGCCACTTATCCAACATTGTTTTCTGAATTCTT  
CCTCTGGGATGGAGTTGAAGAAGTTTTGAATTGCATTCTGGATTTTCGGTCTTCGATTCTGA  
ATCTTCGTCCGCGAAGCTCCTTTTAAAGCGTAGGAAACATCCAAAAATCACATGGAGCCA  
AGTCAGGGCTATAAGGGGGATGAGGGATTGTTTCAACTCCATTTTACTCATAAATTCAC

GTGTTAAGCTCGATGTGTGAGGCCGCGCATTGTCTTGATGGAGTATCCACGAAGCTTTCA  
AGTCCGACCGTTTCCGGGAAATGTGCATTCTCAACTCCTTTAGCACTTTGCAATAATACG  
CACTCTCAACTGTTGTGTTTGGTGGTAAAAATGTTGATAAATGACACCTCGAAAATGAA  
AAAAACACAATAAGGATCACTTTATAGGCCGACTTTTCGATTTACGGCGATGAAGAATCT  
TCCTTAAAAACCGTAGGCGTAACTTTCTAGCCGATTTCAAATTGCCATAACTCGGTCA  
ATTTTTATCCGATTGAGCTGATCTTGGTTTTAATCGATAGGTATTGAGTTGATCTTTAAA  
ATGAAATCAAGATCATGTCTTTATCTATCTTACTTTTGAAGTTACAGAACAAGTCCCGGT  
GCTTTTGGGACACCTTATGTA

--

>Btmar2.8.89\_gi-1092455033-gb-MAMS01000149\_1-:723552-724531  
gi-1092455033-gb-MAMS01000149.1-:723552-724531 Bemisia tabaci isolate MEAM1 Scaffold493, whole  
genome shotgun sequence 980 bp

TACGTAGGGTGTCCAAAAGTACCGGGACTGGTTCTGTAACCTCAAAGTAAGATAGATG  
CAGACATGATTTTGGTCTCATTTTAAAGATCAACTCAATACCTATCGATTTAAACCAAGA  
TCAGCTCAATCGAATAAAAAATTGACCGAGTTATGACAATTTGAAATTAGTGAGGAAAGTT  
TACCCCTACGGTTTTTAGGAAGATTTTCGCTTACCAGGATTCAAAAAGTTAATATTCCT  
ATCCACTTTCCTCCGAATCTTCCATAACTTCCTTTTGCTTTTCAAAGTACCGTCCATCAA  
ACCGGATGCACTTTTTCATGCGCTCTTGCCACTTATCCAACATTGTTTTCTGAATTCTT  
CCTCTGGGATGGAGTTGAAGAAGTTTTGAATTGCATTCTGGATTTTTGTCTTCGATACGA  
ATCTTCGTCCGCGAAGCTCCTTTTTAAGCGCAGGAAACATCCAAAAATCACATGGAGCCA  
AGTCAGGGCTATAAGGGGGATGAGGGATTGTTTCAACTCCATTTTACTCATAAATTCAC  
GTGTTAAGCTCGATGTGTGAGGCCGCGCATTGTCTTGATGGAGTATCCACGAAGCTTTCA  
AGTCCGACCGTTTCCGGGAAATGTGCATTCTCAACTCCTTTAGTACTTTGCAATAATACG  
CACTGTCAACTGTTGTGTTTGTGTTGATGGTACAAAATGTTGATAAATGACACCTCGAAAATAAA  
AAACACAATAAGCATCACTTTATCGGCCGACTTTTCGATTTACGGCGATGAAGAATCTT  
CCTTAAAAACCGTAGGCGTAACTTTCTCGCTGATTTCAAATTGCCATAACTCGGTCAA  
TTTTTATCCGATTGAGCTGATCTTGGTTTTAATCGATAGGTATTGAGTTGATCTTTAAAA  
TGAGATCAAGATTATGTCTGTATCTATCTATTTTGAAGTTACAGACCAAGTCCCGGTG  
CTTTTGGGACACCTTATGTA



>Btmar2.8.90\_gi-1092455312-gb-MAMS01000080\_1-:3009272-3010251  
gi-1092455312-gb-MAMS01000080.1-:3009272-3010251 Bemisia tabaci isolate MEAM1 Scaffold28,  
whole genome shotgun sequence 980 bp

TACGTAGGGTGTCCCAAAAGTACCGGGACTGGTTCTGTAACCTCAAAGTAAGATAGATA  
CAGACATGATTTTGGTCTCATTTTAAAGATCAACTCAATACCTATCGATTAAAACCAAGA  
TCAGCTCAATCGAATAAAAATTGACCGAGTTATGACAATTTGAAATTAGTGAGGGAAGTT  
TACCCCTACGGTTTTTAGGAAGATTTTCGCTTACCAGGATTCAAAAAGTTAATATTCGT  
ATCCACTTTCCTCCGAATCTTCCATAACTTCCTTTTGCTTTTCAAAGTACCGTCCATCAA  
ACCGGATGCACTTTTTCATGCGCTCTTGCCACTTATCCAACATTGTTTTCTGAATTCTT  
CCTCTGGGATGGAGTTGAAGAAGTTTTGAATTGCATTCTGGATTTTGTCTTCGATACGA  
ATCTTCGTCCGCGAAGCTCCTTTTAAAGCGCAGGAAACATCCAAAAATCACATGGAGCCA  
AGTCAGGACTATCAGAGGGATGAGGGATTGTTTCAACTCCATTTTACTCATAAATTCAC  
GTGTGAAGCTCGATGTGTGAGGCCGCGCATTGTCTTGATGGAGTATCCACGAAGCTTTCA  
AGTCCGACCGTTTCCGGGAAATGTGCATTCTCAACTCCTTTAGTACTTTGCAATAATACG  
CACTGTCAACTGTTGTGTTTGATGGTACAAAATGTTGATAAATGACACCTCGAAAATAAA  
AAAACACAATAAGCATCACTTTATCGGCCGACTTTTCGATTTACGGCGATGAAGAATCTT  
CCTTAAAAACTGTAGGCGTAAACTTTCCTCGCTGATTTCAAATTGCCATAACTCGGTCAA  
TTTTATCCGATTGAGCTGATCTTGTTTTAATCGATAGGTATTGAGTTGATCTTTAAAA  
TGAAATCAAGATCATGTCTGTATCTATCTTACTTTCGAAGTTACAGAACAAGTCCCGGTG  
CTTTTGGGACACCTTATGTA

--

>Btmar2.8.91\_gi-1092454629-gb-MAMS01000265\_1-:817616-818595  
gi-1092454629-gb-MAMS01000265.1-:817616-818595 Bemisia tabaci isolate MEAM1 Scaffold1003,  
whole genome shotgun sequence 980 bp

TACGTAGGGTGTCCCAAAAGTACCGGGATTGGTTCTGTAACCTCAAAGTAAGATAGATG  
CAGACATGATTTTGGTCTCATTTTAAAGATCAACTCAATACCTATCGATTAAAACCAAGA  
TCAGCTCAATCAAATAAAAATTGACCGAGTTATGACAATTTGAAATTAGTGAGGAAAGTT  
TACCCCTACGGTTTTTAGGAAGATTTTCGCTTACCAGGATTCAAAAAGTTAATATTCGT  
ATCCACTTTCCTCCGAATCTTCCATAACTTCCTTTTGCTTTTCAAAGTACCGTCCATCAA

ACCGGATGCACTTTTTTCATGCGCTCTTGCCACTTATCCAACATTGTTTTCTGAATTCTT  
CCTCTGGGATGGAGTTGAAGAAGTTTTGAATTGCATTCTGGATTTTTGTCTTCGATACGA  
ATCTTCGTCCGCGAAGCTCCTTTTTAAGCGCAGGAAACATCCAAAAATCACATGGAGCCA  
AGTCAGGACTATAAGGGGGACGAGGGATTGTTCAACTCCATTTTTACTCATAAATTCAC  
GTGTTAAGCTCGATGTGTGAGGCCGCGCATTGTCTTGATGGAGTATCCACGAAGCTTTCA  
AGTCCGACCGTTTCCGGGAAATGTGCATTCTCAACTCTTTAGTACTTTGCAATAATACG  
CACTGTCAACTGTTGTGTTTGATGGTACAAAATGTTGATAAATGACACCTCGAAAATAAA  
AAAACACAATAAGCATCACTTTATCGGCCGACTTTTCGATTTACGGCGATGAAGAATCTT  
CTTTAAAAACCGTAGGCGTAAACTTTCTCGCTGATTTCAAATTGCCATAACTCGGTCAA  
TTTTTATCCGATTGAGCTGATCTTGTTTTAATCGATAGGTATTGAGTTGATCTTTAAAA  
TGAAATCAAGATCATGTCTGTATCTATCTTACTTTTGAAGTTACAGAACAAGTCCCGGTG  
CTTTTGGGACACCTTATGTA

>Btmar2.8.92\_gi-1092454629-gb-MAMS01000265\_1:-982791-983771

gi-1092454629-gb-MAMS01000265.1:-982791-983771 Bemisia tabaci isolate MEAM1 Scaffold1003,  
whole genome shotgun sequence 981 bp

TACGTAGGGTGTCCCAAAAGTACCGGGACTGGTTCTGTAACCTCAAAGTATGATAGATA  
CAGACATGATTTTGGTCTCATTTTAAAGATCAACTCAATACCTATCGATTGAAACCAAGA  
TCAGCTCAATCGAATAAAAATTGACCGAGTAAATGACAATTTGAAATCAGTGAGGAAAGT  
TTACCCCTACGGTTTTTAGGAAGATTTTCCCTTACCAGAATTCAAAAAGTTAATATTCTG  
TATCCACTTTCCTCCGAATCTTCCATAACTTCCTTTTGCTTTTCAAAGTACCGTCCATCA  
AACCGGATGCACTTTTTTCATGCGCTCTTGCCACTTATCCAACATTGTTTTCTGAATTCT  
TCCTCTGGGATGGAGTTGAAGAAGTTTTGAATTGCATTCTGGATTTCTGGTCTTCGATACG  
AATCTTCGTCCGCGAAGCTCCTTTTTAAGCGTAGGAAACATCCAAAAATCACATGGAGCC  
AAGTCAGGGCTATAAGGGGGATGAGGGATTGTTCAACTCCATTTTTACTTATAAATTCA  
CGTGTTAAGCTCGATGTGTGAGGCCGCGCATTGTCTTGATGGAGTATCCACGAAGCTTTC  
AAGTCCGACCGTTTCCGGGAAATGTGCATTCTCAACTCCTTTAGTACTTTGCAATAATAC  
GCACTGTCAACTGTTGTGTTTGATGGTACAAAATGTTGATAAATGACACCTCGAAAATAA  
AAAACACAATAAGCATCACTTTATCGGCCGACTTTTCGATTTACGGCGATGAAGAATCT  
TCCTTAAAAACCGTAGGCGTAAACTTTCTCGCTGATTTCAAATTGCCATAACTCGGTCA  
ATTTTATCCGATTGAGCTGATCTTGTTTTAATCGATAGGTATTGAGTTGATCTTTAAA

ATGAAATCAAGATCATGTCTGTATCTATCTTACTTTCGAAGTTACAGAACAAGTCCCGGT  
GCTTTTGGGACACCTTATGTA

--

>Btmar2.8.93\_gi-1092425825-gb-MAMS01019713\_1-:2514522-2515505  
gi-1092425825-gb-MAMS01019713.1-:2514522-2515505 Bemisia tabaci isolate MEAM1 Scaffold988,  
whole genome shotgun sequence 984 bp

TACGTAGGGTGTCCCAAAGTACCGGGACTGGTTCTGTAACCTCAAAGTAAGATAGATA  
CAGACATGATTTTGGTCTCATTTTAAAGATCAACTCAATACCTATCGATTAACCAAGA  
TCAGCTCAATCGAATAAAATTGACCGAGTTATGACAATTTGAAATTAGTGAGGAAAGTT  
TACCCCTACGGTTTTTAGGAAGATTTTCGCTTACCAGGATTCAAAAAGTTAATATTCGT  
ATCCACTTTCCTCCGAATCTTCATAACTTCCTTTTGCTTTTCAAAGTACCGTCCATCAA  
ACCGGATGCACTTTTTCATGCGCTCTTGCCACTTATCCAACATTGTTTTCTGAATTCTT  
CCTCTGGGATGGAGTTGAAGAAGTTTTGAATTGCATTCTGGATTCGGTCTTCGATACGA  
ATCTTCGTCCGCGAAGCTCCTTTTAACCGTAGGAAACATCCAAAATCACATGGAGCCA  
AGTCAGGGCTATAAGGGGGATGAGGGATTGTTTCAACTCCATTTTACTCATAAATTCAC  
GTGTTAAGCTCGATGTGTGAGGCCGCGCATTGTCTTGATGGAGTACCTATCCACGAAGCT  
TTCAAGTCCGACCGTTTCCGGGAAATGTGCATTCTCAACTCCTTTAGTACTTTGCAATAA  
TACGCACTGTCAACTGTTGTGTTTGATGGTACAAAATGTTGATAAATGACACCTCGAAAA  
TAAAAAACACAATAAGCATCACTTTATCGGCCGACTTTTCGATTTACGGCGATGAAGAA  
TCTTCCTTAAAAACCGTAGGCGTAACTTTCCTCGCTGATTTCAAATTGCCATAACTCGG  
TCAATTTTATCCGATTGAGCTGATCTTGTTTTAATCGATAGGTATTGAGTTGATCTTT  
AAAATGAAATCAAGATCATGTCTGTATCTATCTTACTTTCGAAGTTACAGAACAAGTCCC  
GGTGCTTTTGGGACACCTTATGTA

--

>Btmar2.8.94\_gi-1092449565-gb-MAMS01002590\_1-:126501-127479  
gi-1092449565-gb-MAMS01002590.1-:126501-127479 Bemisia tabaci isolate MEAM1 Scaffold1870,  
whole genome shotgun sequence 979 bp

TACGTAGGGTGTCCCAAAGTACCGGGACTGGTTCTGTAACCTCAAAGTAAGATAGATA  
CAGACATGATTTTGGTCTCATTTTAAAGATCAACTCAATACCTATCGATTAACCAAGA

TCAGCTCAATCGAATAAAAAATTGACCGAGTTATGACAATTTGAAATTAGTGAGGAAAGTT  
TACCCCTACGGTTTTTAGGAAGATTTTCGCTTACCAGGATTCAAAAAGTTAATATTCGT  
ATCCACTTTCCTCCGAATCTTCCATAACTTCCTTTTGCTTTTCAAAGTACCGTCCATCAA  
ACCGGATGCACTTTTTCATGCGCTCTTGCCACTTATCCAACATTGTTTTCTGAATTCTT  
CCTCTGGGATGGAGTTGAAGAAGTTTTGAATTGCATTCTGGATTCGGTCTTCGATACGA  
ATCTTCGTCCGCGAAGCTCCTTTTTAAGCGTAGGAAACATCCAAAAATCACATGGAGCCA  
AGTCAGGGCTATAAGGGGGATGAGGGATTGTTTCAACTCCATTTTTACTCATAAATTCAC  
GTGTTAAGCTCGATGTGTGAGGCCGCGCATTGTCTTGATGGAGTATCCACGAAGCTTTCA  
AGTCCGACCGTTTCCGGGAAATGTGCATTCTCAACTCCTTTAGTACTTTGCAATAATACG  
CACTGTCAACTGTTGTGTTTGATGGTACAAAATGTTGATAAATGACACCTCGAAAATAAA  
AAAACACAATAAGCATCACTTTATCGGCCGACTTTTCGATTACGGCGATGAAGAATCTT  
CCTTAAAAACCGTAGGCGTAAACTTTCCTCGCTGATTTCAAATTGCCATAACTCGGTCAA  
TTTTATCCGATTGAGCTGATTTTGTTTTAATCGATGGGTATTGAGTTGATGTTTAAAA  
TGAGATCAAGATCATGTCTGCATCTATCTTACTTTCGAAGTTACAGAACAAGTCCCGGTG  
CTTTTGGGACACCTTATGT

--

>Btmar2.8.95\_gi-1092449565-gb-MAMS01002590\_1-:40190-41169

gi-1092449565-gb-MAMS01002590.1-:40190-41169 Bemisia tabaci isolate MEAM1 Scaffold1870, whole  
genome shotgun sequence 980 bp

TACGTAGGGTGTCCCAAAAGTACCGGGACTGGTTCTGTAACCTCAAATTAAGAAAGATG  
CAGACATGATTTTGGTCTCATTTTAAAGATCAACTCAATACCTATCGATTAACCAAGA  
TCAGCTCAATCGAATAAAAAATTGACCGAGTTATGACAATTTGAAATTAGTGAGGAAAGTT  
TACCCCTACGGTTTTTAGGAAGATTTTCGCTTACCAGGATTCAAAAAGTTAATATTCGT  
ATCCACTTTCCTCCGAATCTTCCGTAACCTCCTTTTGCTTTTCAAAGTACGCGTCCATCA  
AACCGGATGCACTTTTTCATGCGCTCTTGCCACTTATCCAACATTGTTTTCTGAATTCT  
TCTTTGGGATGGAGTTGAAGAAGTTTTGAATTGCATTCTGGATTTTGTCTTCGATACGA  
ATCTTCGTCCGCGAAGCTCCTTTTTAAGCGTAGGAAACATCCAAAAATCACATGGAGCCA  
AAACAGGGCTATAAGGGGGATGAGGGATTGTTTCAACTCCATTTTTACTCATAAATTCAC  
GTGTTAAGCTCGATGTGTGAGGCCGCGCATTGTCTTGATGGAGTATCCACGAAGCTTTCA  
AGTCCGACCGTTTCCGGGAAATGTGCATTCTCAACTCCTTTAGTACTTTGCAATAATACG

CACTGTCAACTGTTGTGTTTGATGGTACAAAATGTTGATAAATGACACCTCGAAAATAAA  
AAAACACAATAAGCATCACTTTATCGGCCGACTTTTCGATTTACGGCGATGAAGAATCTT  
CCTTAACAACCGTAGGCGTAAACTTTCTCGCTGATTTCAAATTGCCATAACTCGGTCAA  
TTTTTATCCGATTGAGCTGATCTTGGTTTTAATCGATAGGTATTGAGTTGATCTTTAAAA  
TGAAATCAAGATCATGTCTGTATCTATCTTACTTTCGAAGTTACAGAACAAGTCCCGGTG  
CTTTGGGACACCTTATGTA

--

>Btmar2.8.96\_gi-1092446696-gb-MAMS01003835\_1:-603454-604440  
gi-1092446696-gb-MAMS01003835.1:-603454-604440 Bemisia tabaci isolate MEAM1 Scaffold2366,  
whole genome shotgun sequence 987 bp

TACATAGGGTGTCCCAAAAGTACCGGGACTGGTTCTGTAACCTCGAAACTAAGATAGATA  
CAGACATGATCTTGGTTTCATTTTAAAGATCAACTCAGTACCTATTGATTAAGACCAAGA  
TCAGCTCAACCGAATAAAAATTGACCGAGTTATGGCAATTTGAAATCAGTGAGGAAAAGTT  
TACCCCTACGGTTTTTTAGGAAGATTTTTTACTTACCAGGATTCAAAAAGTTAATATCCG  
TATTCGCTTTCCTCCGAATCTTCATAACTTCCTTTTGCTTTTCAAAGTACCGTCCATCA  
AACCGGATGCACTTTTTTCATGCGCTCTTGCCACTTATCCAACATTGTTTTCTGAATTCT  
TCCTTTGGGATGGCGTTGAAAAAGTTCTGAACTGCATTCTGGATTTTCGGTCTTCGATTCTG  
AATTTTCGCCTGCGAAGCTCCATTTTAAGCGTAGGAAACATCCAAAAATCACATGGAGCC  
AAGTCAGGGCTACAAGGGCGATGAAGGATTCTTCAACTCCATTTTTACTAATAAATCCA  
CGTGTTAAGTTCGATGTGTGAGGCCGCGCATTGTCTTGATGGAGTATCCACGAAGCTTTC  
AAGTCCGGCCGTTTCCGGAAGATGTGTATTCTCAACTCCTTTAGCACTTTGCAATAATAC  
GCTCCGTCAACTGTTGTGTTTGGTGGTACAAAATGTTGATAAATGACACCTCGAAAATCA  
AAAAACACAATATAAGCATCCCTTTACAGGCCGATTTTTCGATTTACGGCGATGAAGGAT  
CCTCCTTAAAAACCGCAGGGGTACCTACACTTTCCCACTGATTTCAAATTGCCATAACT  
CGGTCAATTTTTATTTCGATTGAGCTGATCTTGATCTTAATCGATAGGTATTGAGTTGATC  
TTTAAGATGAAACCAAGACCATGTCTGTAGCTATCTTAATTTGAAGTTACAGAATCAGT  
CCCGGTACTTTTGGGACACCCTATGTA

--

>Btmar2.8.97\_gi-1092441835-gb-MAMS01006152\_1-:114051-115030  
gi-1092441835-gb-MAMS01006152.1-:114051-115030 Bemisia tabaci isolate MEAM1 Scaffold3332,  
whole genome shotgun sequence 980 bp

TACGTAGGGTGTCCCAAAAGTACCGGGACTGGTTCTGTAACCTCAAAGTAAGATAGATG  
CAGACATGATTTTGGTCTCATTTTAAAGATCAACTCAATACCTATCGATTAACCAAGA  
TCAGCTCAATCGAATAAAAATTGACCGAGTTATGACAATTTGAAATTAGTGAGGAAAGTT  
TACCCCTACGGTTTTTAGGAAGATTTTCGCTTACCAGGATTCAAAAAGTTAATATTCCT  
ATCCACTTTCCTCCGAATCTTCCATAACTTCCTTCGCTTTTCAAAGTACCGTCCATCAA  
ACCGGATGCACTTTTTCATGCGCTCTTGCCACTTATCCAACATTGTTTCTGAATTCTT  
CCTCTGGGATGGAGTTGAAGAAGTTTTGAATTGCATTCTGGATTCGGTCTTCGATACGA  
ATCTTCGTCCGCGAAGCTCCTTTTAAAGCGTAGGAAACATCCAAAAATCACATGGAGCCA  
AGTCAGGGCTATAAGGGGGATGAGGGATTGTTCAACTCCATTTTACTTATAAATTCAC  
GTGTTAAGCTCGATGTGTGAGACCGCGCATTGTCTTGATGGAGTATCCACGAACTTTCA  
AGTCCGACCGTTTCCGGGAAATGTGCATTCTCAACTCCTTTAGTACTTTGCAATAATACG  
CACTGTCAACTGTTGTGTTTGATGGTACAAAATGTTGATAAATGACACCTCGAAAATAAA  
AAACACAATAAGCATCACTTTATCGGCCGACTTTTCGATTTACGGCGATGAAGAATCTT  
CCTGAAAAACCGTAGGCGTAACTTTCCTCGCTGATTTCAAATTGCCATAACTCGGTCAA  
TTTTATCCGATTGAGCTGATCTTGGTTTTAATCGATAGGTATTGAGTTGATCTTTAAAA  
TGAAATCAAGATCATGTCTGTATCTATCTTACTTTCGAAGTTACAGAACAAGTCCCGGTG  
CTTTGGGACACCTTATGTA

--

>Btmar2.8.98\_gi-1092454766-gb-MAMS01000216\_1-:1483163-1484128  
gi-1092454766-gb-MAMS01000216.1-:1483163-1484128 Bemisia tabaci isolate MEAM1 Scaffold659,  
whole genome shotgun sequence 966 bp

TACGTAGGGTGTCCCAAAAGTACCGGGACTGGTTCTGTAACCTCAAAGTATGATAGATA  
CAGACATGATTTTGGTCTCATTTTAAAGATCAACTCAATACCTATCGATTAACCAAGA  
TCAGCTCAATCGAATAAAAATTGACCGAGTTATGACAATTTGAAATTAGTGAGGAAAGTT  
TACCCCTACGGTTTTTAGGAAGATTTTCGCTTACCAGGATTCAAAAAGTTAATATTCGT  
ATCCACTTTCCTCCGAATCTTCCATAACTTCCTTTGCTTTTCAAAGTACCGTCCATCAA

ACCGGATGCACTTTTTCATGCGCTCTTGCCACTTATCCAACATTGTTTTCTGAATTCTT  
CCTCTGGGATGGAGTTGAAGAAGTTTTGAATTGCATTCTGGATTCGGTCTTCGATACGA  
ATCTTCGTCCGCGAAGCTCCTTTTTAAGCGTAGGAAACATCCAAAAATCACATGGAGCCA  
AGTCAGGGCTATAAGGGGGATGAGGGATTGTTCAACTCCATTTTACTCATAAATTCAC  
GTGTTAAGCTCGATGTGTGAGGCCGCGCATTGTCTTGATGGAGTATCCACGAAGCTTTCA  
AGTCCGACCGTTTCCGGGAAATGTGCATTCTCAACTCCTTTAGTACTTTGCAATAATACG  
CACTGTCAACTGTTGTGTTTGATGGTACAAAATGTTGATAAATGACACCTCGAAAATAAA  
AAACACAATAAGCATCACTTTATCGGCCGACTTTTCGATTTACGGCGATGAAGAATCTT  
CCTTAAAAACCGTAGGCGTAAACTTTCTCGCTGATTTCAAATTGCCATAACTCGGTCAA  
TTTTTATCCGATTGAGCTGATCTTGGTTTTAATCGATAGGTATTGAGTTGATCTTTAAAA  
TGAGATCAAGATCATGTCTGTATCTATCTTACTTTTGAAGTTACAGAACAAGTCCCGGTG  
CTTTTG

>Btmar2.8.99\_gi-1092454766-gb-MAMS01000216\_1-:1889884-1890869  
gi-1092454766-gb-MAMS01000216.1-:1889884-1890869 Bemisia tabaci isolate MEAM1 Scaffold659,  
whole genome shotgun sequence 986 bp

TACGTAGGGTGTCCCAAAGTATACCGGGACTGGTTCTGTAACCTCAAAGTAATATAGA  
TACAGATATGATTTTGGTCTCATTTTAAAGATCAACTCAATACCTATCGATTAAAACCAA  
GATCAGCTCAATCGGATAAAAATTGACCGAGTTATGACAATTTGAAATTAGTGAGGAAAAG  
TTTACCCCTACGTTTTTTAGGAAGATTTTTCGCTTACCAGGATTCAAAAAGTTAATATTC  
GTATCCACTTTCCTCCGAATCTTCATAACTTCCTTTTGCTTTTCAAAGTACCGTCCATC  
AAACCGGATGCACTTTTTCATGCGCTCTTGCCACTTATCCAACATTGTTTTCTGAATTC  
TTCCTCTGGGATGGAGTTGAAGAAGTTTTGAATTGCATTCTGGATTCGGTCTTCGATAC  
GAATCTTCGTCCGCGAAGCTCCTTTTTAAGCGTAGGAAACATCCAAAAATCACATGGAGC  
CAAGTCAGGGCTATAAGGGGGATGAGGGATTGTTCAACTCTATTTTACTCATAAATTC  
ACGTGTTAAGCTCGATGTGTGAGGCCGCGCATTGTCTTGATGGAGTATCCACGAAGCTTT  
CAAGTCCGACCGTTACCGGGAAATGTGCATTCTCAACTCCTTTAGCACTTTGCAATAATA  
CGCACTCTCAACTGTTGTGTTTGGTGGTACAAAATGTTGATACTTAAATGACACCTCGAA  
AATAAAATAACACAATAAGCATCACTTTATAGGCCGACTTTTCGATTTACGGCGATGAAG  
AATCTTCCTTAAAAACCGTAGGGGTAAACTTTCTCGCTGATTTCAAATTGCCATAACTC  
GGTCAATTTTTATCCGATTGAGCTGATCTTGGTTTTAATCGATAGGTATTGAGTTGATCT

TTAAATGAGATCAAGATCATGTATGTATCTATCTTACTTTTGAAGTTACAGAACAAGTC  
CCGGTGCTTTTGGGACACCTTATGTA

>Btmar2.8.100\_gi-1092438189-gb-MAMS01007806\_1-:15682-16661  
gi-1092438189-gb-MAMS01007806.1-:15682-16661 Bemisia tabaci isolate MEAM1 Scaffold40184, whole  
genome shotgun sequence 980 bp

TACGTAGGGTGTCCCAAAAGTACCGGGACTGGTTCTGTAACCTCAAAGTAAGATAGATA  
CAGACATGATTTTGGTCTCATTTTAAAGATCAAGTCAATACCTATCGATTAACCAAGA  
TCAGCTCAATCGAATAAAAATTGACCGAGTTATGACAATTTGAAATTAGTGAGGAAAGTT  
TACCCCTACGGTTTTTAGGAAGATTTTCGCTTACCAGGATTCAAAAAGTTAATATTCGT  
ATCCACTTTCCTCCGAATCTTCATAACTTCCTTTTGCTTTCAAAGTACCGTACATCAA  
ACCGGATGCAATTTTTCATGCGCTCTTGCCACTTATCCAACATTGTTTCTGCATTCTT  
CCTCTGGGATGGAGTTGAAGAAGTTTTGAATTGCATTCTGGATTTTGTCTTCGATACGA  
ATCTTCGTCCGCGAAGCTCCTTTTAAAGCGTAGGAAACATCCAAAAATCACATGGAGCCA  
AGTCAGGGCTATAAGGGGGATGAGGGATTGTTCAACTCCATTTTACTTATAAATTCAC  
GTGATAAGCTCGATGTTTGAGGCCGCGCATTGTCTTGATGGAGTATCCACGAAGCTTCA  
AGTCCGACCGTTTCCGGGAAATGTGCATTCTCAACTCCTTAGTACTTTGCAATAATACG  
CACTGTCAACTGTTGTGTTTGATGGTACAAAATGTTGATAAATGACACCTCGAAAATAAA  
AAAACACAATAAGCATCACTTTATCGGCCGACTTTTCGATTTACGGCGATGAAGAATCTT  
CCTTAAAAACCGTAGGCGTAACTTTCCTCGCTGATTTCAAATTGCCATAACTCGGTCAA  
TTTTATCTGATTGAGCTGATCTTGGTTTTAATCGATAGGTTTTGAGTTGATCTTTAAAA  
TGAAATCAAGATCATGTCTGTATCTATCTTACTTTGAAGTTACAGAACAAGTCCCGGTG  
CTTTGGGACACCTTACGTA

--

>Btmar2.8.101\_gi-1092455134-gb-MAMS01000120\_1-:486816-487795  
gi-1092455134-gb-MAMS01000120.1-:486816-487795 Bemisia tabaci isolate MEAM1 Scaffold39, whole  
genome shotgun sequence 980 bp

TACGTAGGGTGTCCCAAAAGTACCGGGACTGGTTCTGTAACCTCAAAGTAAGATAGATG  
CAGACATGATTTTGGTCTCATTTTAAAGATCAACTCAATACCTATCGATTAACCTAGA  
TCAGCTCAATCGAATAAAAATTGACCGAGTTATGACAATTTGAAATTAGTGAGGAAAGTT  
TACCCCTACGGTTTTTAGGAAGATTTTCGCTTACCAGGATTCAAAAAGTTAATATTCGC



ATCCACTTTCCTCCGAATCTTCCATAACTTCCTTTTGCTTTTCAAAGTACCGTCCATCAA  
ACCGGATGCACTTTTTTCATGCGCTCTTGCCACTTATCCAACATTGTTTTCTGAATTCTT  
CCTCTGGGATGGAGTTGAAGAAGTTTTGAATTGCATTCTGGATTTTTGTCTTCGATACGA  
ATCTTCGTCCGCGAAGCTCCTTTTTAAGCGCAGGAAACATCCAAAAATCACATGGAGCCA  
AGTCAGGACTATAAGGGGGATGAGGGATTGTTCAACTCCATTTTTACTCATAAATTCAC  
GTGTTAAGCTCGATGTGTGAGGCCGCGCATTGTCTTGATGGAGTATCCACGAAGCTTTCA  
AGTCCGACCGTTTCCGGGAAATGTGCATTCTCAACTCCTTTAGTACTTTGCAATAATACG  
CACTGTCAACTGTTGTGTTTGATGGTACAAAATTTTGATAAATGACACCTCGAAAATAAA  
AAACACAATAAGCATCACTTTATCCGCCGACTTTTCGATTTACGTCGATGAAGAATCTT  
CCTTAAAAACCGTAGGCGTAAACTTTCTCGCTGATTTCAAATTGCCGTAACTCGGTCAA  
TTTTTATCCGATTGAGCTGATCTTGGTTTTAATCGATAGGTATTGAGTTGATCTTTAAAA  
TGAAATCAAGATCATGTCTGTATCTATCTTACTTTTGAAGTTACAGAACAAGTCCCGGTG  
TTTTTGGGACACCTTACGTA

--

>Btmar2.8.102\_gi-1092455215-gb-MAMS01000097\_1:-4925021-4926000  
gi-1092455215-gb-MAMS01000097.1:-4925021-4926000 Bemisia tabaci isolate MEAM1 Scaffold325,  
whole genome shotgun sequence 980 bp

TACGTAGGGTGTCCCAAAAGTACCGGGACTGGTTCTGTAACCTCAAAGTAAGATAGATG  
CAGACATGATTTTGGTCTCATTTTAAAGATCAACTCAATACCTATCGATTAACCAAGA  
TCAGCTCAATCGAATAAAAATTGACCGAGTTATGACAATTTGAAATTAGTGAGGAAAGTT  
TACCCCTACGGTTTTTAGGAAGATTTTCGCTTACCAGGATTCAAAAAGTTACTATTCCT  
ATCCACTTTCCTCCGAATCTTCCATAACTTCCTTCGCTTTTCAAAGTACCGTCCATCAA  
ACCGGATGCACTTTTTTCATGCGCTCTTGCCACTTATCCAACATTGTTTTCTGAATTCTT  
CCTCTGGGATGGAGTTGAAGAAGTTTTGAATTGCATTCTGGATTTTCGGTCTTCGATACGA  
ATCTTCGTCCGCGAAGCTCCTTTTTAAGCGTAGGAAACATCCAAAAATCACATGGAGCCA  
AGTCAGGGCTATAAGGGGGATGAGGGATTGTTCAACTCCATTTTTACTTATAAATTCAC  
GTGTTAAGCTCGATGTGTGAGGCCGCGCATTGTCTTGATGGAGTATCCACTAAGCTTTCA  
AGTCCGACCGTTTCCGGGAAATGTGCATTCTCAACTCCTTTAGTACTTTGCAATAATACG  
CACTGTCAACTGTTGTGTTTGATGGTACAAAATGTTGATAAATGACACCTCGAAAATAAA  
AAACACAATAAGCATCACTTTATCGGCCGACTTTTCGATTTACGGCGATGAAGAATCTT

CCTGAAAAACCGTAGGCGTAACTTTCCTCGCTGATTTCAAATTGCCATAACTCGGTCAA  
TTTTTATCCGATTGAGCTGATCTTGGTTTTAATCGATAGGTATTAAGTTGATCTTTAAAA  
TGAAATCAAGATCATGTCTGTATCTATCTTACTTTTGAAGTTACAGAACAAGTCCCGGTG  
CTTTTGGGACACCTTATGTA

--

>Btmar2.8.103\_gi-1092433295-gb-MAMS01012243\_1-:288-1263  
gi-1092433295-gb-MAMS01012243.1-:288-1263 Bemisia tabaci isolate MEAM1 Scaffold59428, whole  
genome shotgun sequence 976 bp

TACGTAGGGTGTCCCAAAAGTACCGGGACTGGTTCTGTAACCTCAAAGTAAGATAGATA  
CAGACATGATTTTGGTCTCATTTTAAAGATCAACTCAATACCTATCGATTAACCAAGA  
TCAGCTCAATCGAATAAAAATTGACCGAGTTATGACAATTTGAAATTAGTGAGGAAAGTT  
TACCCCTACGGTTTTTAGGAAGATTTTCGCTTACCAGGATTCAAAAAGTTAATATTCGT  
ATCCACTTTCCTCCGAATCTTCCATAACTTCCTTTGCTTTTCAAAGTACCGTCCATCAA  
ACCGGATGCACTTTTTCATGCGCTCTTGCCACTTATCCAACATTGTTTTCTGAATTCTT  
CCTCTGGGATGGAGTTGAAGAAGTTTTGAATTGCATTCTTGATTCGGTCTTCGATACGA  
ATCTTCGTCCGCGAAGCTCCTTTTAAAGCGCAGGAAACATCCAAAAATCACATGGAGCCA  
AGTCAGGACTATAAGAGGGATGAGGGATTGTTTCAACTCCATTTTACTCATAAATTCGT  
TAAGCTCGATGTGTGAGGCCGCGCATTGTCTTGATGGAGTATCCACGAAGCTTTCAAGTC  
CGACCGTTTCCGGGAAATGTGCATTCTCAACTCCTTTAGTACTTTGCAATAATACGCACT  
GTCAACTGTTGTGTTTGATGGTACAAAATGTTGATAAATGACACCTCGAAAATAAAAAA  
CACAATAAGCATCACTTTATCGGCCGACTTTTCGATTTACGGCGATGAAGAATCTTCCTT  
AAAAACCGTAGGCGTAACTTTCCTCGCTGATTTCAAATTGCCATAACTCGGTCAATTTT  
TATCGGATTGAGCTGATCTTGGTTTTAATCGATAGGTATTGAGTTGATCTTTAAATGAA  
ATCAAGATCATGTCTGTATCTATTTTACTTTTGAAGTTACAGAACAAGTCCCGGTGCTTT  
TGGGACACCTTATGTA

>Btmar2.8.104\_gi-1092436970-gb-MAMS01008568\_1-:283-1262  
gi-1092436970-gb-MAMS01008568.1-:283-1262 Bemisia tabaci isolate MEAM1 Scaffold43444, whole  
genome shotgun sequence 980 bp

TACGTAGGGTGTCCCAAAAGTACCGGGACTGGTTCTGTAACCTCAAAGTAAGATAGATG  
CAGACACGATTTTGGTCTCATTTTAAAGATCAACTCAATACCTATCGATTAACCAAGA

TCAGCTCAATCGAATAAAAAATTGACCGAGTTATGACAATTTGAAATTAGTGAGGAAAGTT  
TACCCCTACGGTTTTTAGGAAGATTTTCGCTTACCAGGATTCAAAAAGTTAATATTCCT  
ATCCACTTTCCTCCGAATCTTCCATAACTTCCTTCGCTCTTCAAAGTACCGTCCATCAA  
ACCGGATGCACTTTTTCATGCGCTCTTGCCACTTATCCAACATTGTTTTCTGAATTCTT  
CCTCTGGGATGGAGTTGAAGAAGTTTTGAATTGCATTCTGGATTCGGTCTTCGATACGA  
ATCTTCGTCCGCGAAGCTCCTTTTTAAGCGTAGGAAACATCCAAAAATCACATGGAGCCA  
AGTCAGGGCTATAAGGGGGATGAGGGATTGTTCAACTCCATTTTTACTTATAAATTCAC  
GTGTTAAGCTCGATGTGTGAGGCCGCGCATTGTCTTGATGGAGTATCCCCGAAGCTTTCA  
AGTCCGACCGTTTCCGGGAAATGTGCATTCTCAACTCCTTTAGTACTTTGCAATAATACG  
CACTGTCAACTGTTGTGTTTGATGGTACAAAATGTTGATAAATGACACCTCGAAAATAAA  
AAAACACAATAAGCATCACTTTATCGGCCGACTTTTCGATTTACGGCGATGAAGAATCTT  
CCTGAACAACCGTAGGCGTAACTTTCCTCGCTGATTTCAAATTGCCATAACTCGGTCAA  
TTTTTATCCGATTGAGCTGATCTTGGTTTTAATCGATAGGTATTAAGTTGATCTTTAAAA  
TGAAATCAAGATCATGTCTGTATCTATCTTACTTTGAAAGTCACAGAACAAGTCCCGGTG  
CTTTTGGGACACCTTATGTA

>Btmar2.8.105\_gi-1092449174-gb-MAMS01002762\_1-:79204-80188

gi-1092449174-gb-MAMS01002762.1-:79204-80188 Bemisia tabaci isolate MEAM1 Scaffold1944, whole  
genome shotgun sequence 985 bp

TACGTAGGGTGTCCCAAAAGTACCGGGACTGGTTCTGTAACCTCAAAAGTAAGATAGATA  
CAGACATAATTTTGGTCTCAGTTTAAAGATCAACTCAATACCTATCGATTAACCAAGA  
TCAGCTCAATCGAATAAAAAATTGACCGAGTCATGACAATTTGAAATTAGTGAGGAAAGTT  
TACCCCTACGGTTTTTAGGAAGATTTTCACTTACCAGGATTCAAAAAGTTAATATTCGT  
ATCAACTTTCCTCCGAATCTTCCATAACTTCCTTTTGCTTTTCAAAGTACCGTTCATCAA  
ACCGGATGCACGATACTTTTTCATGCGCTCTTGCCACTTATCCAACATTGTTTTCTGAA  
TTCTTCCTCTGGGATGGAGTTGAAGAAGTTTTGAATTGCATTCTGGATTTTTGTCTTCGA  
TACGAATCTTCGTCCGCGAAGCTCCTTTTTAAGCGTAGGAAACATCCAAAAATCACATGG  
AGCCAAGTCAGGGCTATAAGGGGGATGAGGGATTGTTCAACTCCATTTTTACTCATAAA  
TTCACGTGTTAAGCTCGATGTGTGAGGCCGCGCATTGTCTTGATGGAGCATCCACGAAGG  
TTTCAAGTCCGACCGTTTCCGGGAAATGTGCATTCTCAACTCCTTTAGTACTTTGCAATA  
ATACGCACTGTCAACTGTTGTGTTTGATGGTACAAAATGTTGATAAATGACACCTCGAAA

ATAAAAAAACACAATAAGCATCACTTTATCGGCCGACTTTTCGATTTACGGCGATGAAGA  
ATCTTCCTTAAAAACCGTAGGCGTAACTTTCTCGCTGATTTCAAATTGCCATAACTCG  
GTCAATTTTTATCCGATTGAGCTGATTTTGGTTTTAATCGATAGGTACTGAGTTGATCTT  
TAAAATAAAATCAAGATCATGTCTGTATCTATCTTACTTTTGAAGTTACAGAACAAGTCC  
CGGTGCTTTTGGGACACCTTATGTA

>Btmar2.8.106\_gi-1092449174-gb-MAMS01002762\_1-:325548-326145  
gi-1092449174-gb-MAMS01002762.1-:325548-326145 Bemisia tabaci isolate MEAM1 Scaffold1944,  
whole genome shotgun sequence 598 bp

TACATCGGCTGTCCCTAAAGAACCCGGACTGATTCTGTAACCTCTAAACTACGATAGATG  
CAGACATGATCTTGGTTTCATTTTAAGGATCAACTCAATACCTATTGATTAAGACCAAGA  
TCAGCTCAATCGAACAAAAATGACCGAGTTATGATAATTTAAAATCAGTGAGTAAAGTTT  
ACCCCTAAGGTTTTTAAGGAAGACTTTTCGCTTACCAGGATTCAAAAAGTTAATTTTCGT  
TTCCGCTGTCCTCCGAATCTTCCATGACTTCCTTCCGCTTTTCAAAGTACCGTCCATTAA  
ACCGGATGCACTTACTCATGAGCTCTTGCCACTTCTCTAATATCGTTTTCTGAATTCTT  
CCCATGAGATGGAGTTGAAAAAGTTCTGAACTGCCTTCTGGATTTTCGGTCTCTATTTCGA  
ATCTTTGTCCGCGAGGCTCCTTAATAGTGGGAAACATCCAAAAATCACAAGGAGCCAAGT  
CAGGGCTCTAAGGAGGATGAAGGATTGTTTTAACCTCATTTTTACTCATAAACTCACCTT  
AGAATTCGAGCTATGAGGCCGCGGTTGTCTTGATGGAGCATCCACGAAGCTTTCAAG

--

>Btmar2.8.107\_gi-1092445037-gb-MAMS01004535\_1-:177099-178079  
gi-1092445037-gb-MAMS01004535.1-:177099-178079 Bemisia tabaci isolate MEAM1 Scaffold2663,  
whole genome shotgun sequence 981 bp

TACGTAGGGTGTCCCAAAAGTACCGGGACTGGTTCTGTAACCTCAAAAGTAAGATAGATA  
CAGACATGATTTTGGTCTCATTTTAAAGATCAACTCAATACCTATCGATTAACCAAGA  
TCAGCTCAATCGAATAAAAATTGACCGAGTTATGACAATTTGAAATTAGTGAGGAAAGTT  
TACCCCTACGATTTTATAGGAAAATTTTCGCTTACCAGGATTCAAAGAGTTAATATTCGT  
ATCCACTTTCCTCCGAATCTTCCATAACTTCTTTTGCTTTTCAAAGTACCGTCCATCAA  
ACCGGATGCACTTTTTCATGCGCTCTTGCCACTTATCCAACATTATTTTCTGAATTCTT  
CCTCTGGGATGGAGTTGAAGAAGTTTTGAATTGCATTCTGGATTTTCGGTCTTCGATACGA

ATCTTCGTCCGCGAAGCTCCTTTTTAAGCGTAGGAAACATCCAAAAATCACATGGAGCTA  
AGTCAGGGCTATATGGGGGATGAGGGATTGTTTCAACTCCATTTTTACTCATAAATTCAC  
GTGTTAAGCTCGATGTGTGAGGCCGCGCATTGTCTTGATGGAGTATCCACGAAGATTTC  
AGTCCGACCGTTTCCGGGAAATGTGCATTCTCAACTCCTTTAGTACTTTGCAATAATATG  
CACTGTCAACTGTTGTGTTTGATGGTACAAAATGTTGATAAATGACACCTCGAAAATAAA  
AAAAACACAATAAGCATCACTTTATCGGCCGACTTTTCGATTTACGGCGATGAAGAATCT  
TCCTTAAAAACCGTAGGCGTAACTTTCTCGCTGATTTCAAATTGCCATAACTCGGTCA  
ATTTTTATCCGATTGAGCTGATCTTGTTTTAATCGATAGGTATTGAGTTGATCTTTAAA  
ATGAGATCAAGATCATGTCTGTATCTATCTTACTTTCGAAGTTACAAAACAAGTCCCGGT  
GCTTTTGGAACACCTTATGTA

--

>Btmar2.8.108\_gi-1092432705-gb-MAMS01012833\_1-:65624-66603  
gi-1092432705-gb-MAMS01012833.1-:65624-66603 Bemisia tabaci isolate MEAM1 Scaffold62097, whole  
genome shotgun sequence 980 bp

TACGTAGGGTGTCCCAAAGTACCGGGACTGGTTCTGTAACCTCAAAGTAAGATAGATA  
CAGACATGATTTTGGTCTCATTTTGAAGATCAACTCAATACCTATCGATTAACCAAGA  
TCAGCTCAATCGAATAAAAATTGACTGAGTTATGACAATTTGAAATTAGTGAGGAAAGTT  
TACCCCTACGGTTTTTAGGAAGATTTTCGCTTACCAGGATTCAAAAAGTTAATATTCGT  
ATCCACTTTCCTCCGAATCTTCATAACTTCCTTTTGCTTTTCAAAGTACCGTCCATCAA  
ACAGGATGCACTTTTTCATGCGCTCTTGCCACTTATCCAACATTGTTTTCTGAATTCTT  
CCTCTGGGATGGAGTTGAAGAAGTTTTGAATTGCATTCTGGATTTTGTCTTCGATACGA  
ATCTTCGTCCACGAAGCTCCTTTTTAAGTGTAGGAAACATCCAAAAATCACATGGAGCCA  
AGTCAGGGCTGTAAGGGGGATGAGGGATTGTTTCAACTCCATTTTTACTCATAAATTCAC  
GTGTTAAGCTCGATGTGTGAGGCCGCGCTTGTCTTGATGGAGTATCCACGAAGCTTTCAA  
GTCCGACCGTTTCCGGGAAATGTGCATTCTCAACTCCTTTAGCACTTTGCAATAATACGC  
ACTGTCAACTGTTGTGTTTGGTGGTACAAAATGTTGATAAATGACACCTCGAAAATGAAA  
AAAACACAATAAGCATCACTTTATAGGCCGACTTTTCGATTTACGGCGATGAAGAATCTT  
CCTTAAAAACCGTAGGCGTAACTTTCTCGCTGATTTCAAATTGCCATAACTTGGTCAA  
TTTTTATCCGATTGAGCTGATCTTGTTTTAATCGATAGGTATTGAGTTGATCTTTAAAA  
TGAGATCAAGATCATGTCTGTATCCATCTTACTTTCGAAGTTACAGAACAAGTCCCGGTG

CTTTTGGGACACCTTTTGTA

--

>Btmar2.8.109\_gi-1092429975-gb-MAMS01015563\_1-:248494-249466  
gi-1092429975-gb-MAMS01015563.1-:248494-249466 Bemisia tabaci isolate MEAM1 Scaffold743, whole  
genome shotgun sequence 973 bp

TACGTAGGGTGTCCCAAAAGTACCGGGACTGGTTCTGTAACCTCAAAAGTAAGATAGATA  
CAGACATGATTTTGGTCTCATTTTAAAGATCAACTCAATACCTATCGATTAACCAAGA  
TCAGCTCAATCGAATAAAAATTGACCGAGTTATGACAATTTGAAATTAGTGAGGAAAGTT  
TACCCCTACGGTTTTTAGGAAGATTTTCGCTTACCAGGATTCAAAAAGTTAATATTCGT  
ATCCACTTTCCTCCGAATCTTCATAACTTCCTTTTGCTTAAGTACCGTCCATCAAACCG  
GATGCACTTTTTCATGCGCTCTTGCCACTTATCCAACATTGTTTTCTGAATTCTTCCTC  
TGGGGTGGAGTTGAAGAAGTTTTGAATTGCATTCTGGATTTGGTCTTCGATACGAATCT  
TCGTCCGCGAAGCTCCTTTTAAAGCGTAGGAAACATCTAAAAATCACATGGAGCCAAGTC  
AGGGCTATAAGGGGGATGAGGGATTGCTTCAACTCCATTTTACTCATAAATTCACGTGT  
TAAGCTCGATGTGTGAGGCCGCGCATTGTCTTGATGGAGTATCCACGAAGCTTCAAGTC  
CGACCGTTTCCGGGAAATGTGCATTCTCAACTCCTTTAGTACTTTGCAATAGCGCACTGT  
CAACTGTTGTGTTTGATGGTACAAAATGTTGATAAATGACACCTCGAAAATAAAAAACAC  
AATAAGCATCACTTTATCGGCCGACTTTTCGATTTACGGCGATGAAGAATCTTCCTTAAA  
AACCGTAGGCGTAACTTTCCTCGCTGATTTCAAATTGCCATAGCTCGGTCAATTTTTAT  
CCGATTGAGCTGATCTTGGTTTTAATCGATAGGTATTGAGTTGATCTTTAAATGAAATC  
AAGATCATGTCTGTATCTATCTTACTTTTGAAGTTACAGAACAAGTCCCGGTGCTTTTGG  
GACACCTTTTGTA

--

>Btmar2.8.110\_gi-1092454972-gb-MAMS01000167\_1-:2642819-2643771  
gi-1092454972-gb-MAMS01000167.1-:2642819-2643771 Bemisia tabaci isolate MEAM1 Scaffold533,  
whole genome shotgun sequence 953 bp

TACGTAGGGTGTCCCAAAAGTACCGGGACTGGTTCTGTAACCTCAAAAGTAAGATAGACG  
CAGACATGATTTTGGTCTCATTTTAAAGATCAACTCAATACCTATCGATTAACCAAGA  
TCAGCTCAATCGAATAAAAATTGACCGAGTCATGACAATTTGAAATTAGTGAGGAAAGTT  
TACCCCTACGGTTTTTAGGAAGATTTTCGCTTACCAGGATTCAAAAAGTTAATATTCGT

ATCCACTTTCCTCCGAATCTTCCATAACTTCCTTTTGCTTTTCAAAGTACCGTCCATCAA  
ACCGGATGCACTTTTTTCATGCGCTCTTGCCACTTATCCAACATTGTTTTCTGAATTCTT  
CCTCTGGGATGGAGTTGAAGAAGTTTTGAATTGCATTCTGGATTTTTGTCTTCGATACGA  
ATCTTCGTCCGCGAAGCTCCTTTTTAAGCGTGGGAAACATCCAAAAATCACATGGAGCCA  
AGTCAGCGCTATTAGGGGGATGAGGGATTGTTTCAACTCCATTTTTACTCATAAATTCAC  
GTGTTAAGCTCGATGTGTGAGGCCGCGCATTGTCTTGATGGAGTATCCACGAAGCTTTCA  
AGTCCGACCGTTTCCGGGAAATGTGCATTCTCAACTCCTTTAGTACTTTGCAATAATACG  
CACTGTCAACTGTTGTGTTTGATGGTACAAAATGTTGATAAATGACACCTCGAAAATAAA  
AAACACAATAAGCATCACTTTATCGGCCGACTTTTCGATTTACGGCGATGAAGAATCTT  
CCTTAAAAACCGTAGGCGTAAACTTTCTCGCTGATTTCAAATTGCCATAACTCGGTCAA  
TTTTTATCCGATTGAGCTGATCTTGGTTTTAATCGATGGGTATTGAGTTGATCTTTAAAA  
TGAGATCAAGATCATGTCTGTATCTATCTTACTTTTGAAGTTACAGAACAAGT

>Btmar2.8.111\_gi-1092454972-gb-MAMS01000167\_1-:1912741-1913711

gi-1092454972-gb-MAMS01000167.1-:1912741-1913711 Bemisia tabaci isolate MEAM1 Scaffold533,  
whole genome shotgun sequence 971 bp

TACGTAGGGTGTCCCAAAGTACCGGGACTGGTTCTGTAACCTCAAAGTAAGATAGATG  
CAGACATGATTTGTGAAAGATCAACTCAATACCTATCGATTAAAACCAAGATCAGCTCAA  
TCGAATAAAAATTGACCGAGTTATGACAATTTGAAATTAGTGAGGAAAGTTTACCCCTAC  
GGTTTTTAGGAAGATTTTTCGCTTACCAGGATTCAAAAAGTTAATATTCGTATCCACTTT  
CCTTCGAATCTTCCATAATTTCTTTTGCTTTTCAAAGTACCGTCCATCAAACCGGATGC  
ACTTTTTTCATGCGCTCTTGCCACTTATCCAACATTGTTTTCTGAATTCTTCCTCTGGGA  
TGGAGTTGAAGAAGTTTTGAATTGCATTCTGGATTTGGTCTTCGATACGAATCTTCGTC  
CGCGAAGCTCCTTTTTAAGCGTGGGAAACATCCAAAAATCACATGGAGCCAAGTCAGCGC  
TATTAGGGGGATGAGGGATTGTTTCAACTCCATTTTTACTCATAAATTCACGTGTTAAGC  
TCGATGTGTGAGGCCGCGCATTGTCTTGATGGAGTATCCACGAAGCTTTCAAGTCCGACC  
GTTTCCGGGAAATGTGCATTCTCAACTCCTTTAGTACTTTGCAATAATACGCACTGTCAA  
CTGTTGTGTTTGATGGTACAAAATGTTGATAAATGACACCTCGAAAATAAAAAACACAA  
TAAGCATCACTTTATCGGCCGACTTTTCGATTTACGGCGATGAAGAATCTTCCTTAAAAA  
CCGTAGGCGTAAACTTTCTCGCTGATTTCAAATTGCCATAACTCGGTCAATTTTTATCC  
GATTGAGCTGATCTTGGTTTTAATCGATAGGTATTGAGTTGATCTTTAAAATGAAATCAA

GATCATGTCTGTATCTATCTTACTTTCTGAAGTTACAGAACAAAGTCCCGGTGCTTTTGGGA  
CACCTTACGTA

>Btmar2.8.112\_gi-1092426883-gb-MAMS01018655\_1-:143126-144114  
gi-1092426883-gb-MAMS01018655.1-:143126-144114 Bemisia tabaci isolate MEAM1 Scaffold8852,  
whole genome shotgun sequence 989 bp

TACGTAGGGTGTCCCAAAAGTACCGGGACTGGTTCTGTAACCTCAAAGTAAGATAGATA  
CAGACATGATTTTGGTCTCATTTTGAAGATCAACTCAATACCTATTGATTAAAGCCAAGA  
TCAGCTCAATCGAATAAAAATTGACCGAGTTATGACAATTTGAAATTAGTGAGGAAAGTT  
TACCCCTACGGTTTTTAGGAAGATTTTCGCTTACCAGGATTCAAAAAGTTAGTATTCGT  
ATCCACTTTCCTCCGAATCTTCATAACTTCCTTTTGCTTTTCAAAGTACCGTCCATCAA  
ACCGGATGCACTTTTTCATGCGCTCTTGCCACTTATCCAACATTGTTTTCTGAATTCTT  
CCTCTGGGATGGAGTTGAAGAAGTTTTGAATTGCATTCTGGATTTTTGTCTTCGATACGA  
ATCTTCGTCCGCGAGGCTCCTTTTAAAGCGTAGGAAACATCCAAAAATCACATGGAGCCA  
AGTCAGGGCTATAAGGGGGATGAGGGATTGTTCAACTCCATTTTACTCATAAATTCAC  
GTGTTAAGCTCGATGTGTGAGGTCGCGCATTGTCTTGATGGAGTATCCACGAAGCTTTCA  
AGTCCGACCGTTTCCGGGAAATGTGCATATTCTCAACTCCTTTAGTACTTTGCAATAATA  
CGCACTGTCAACTGTTGTGTTTGATGGTACAAAATGTTGATAAATGACACCTCGAAAATA  
AAAAAACACATTAAGCATCACTTTATCGGCCGACTTTTCGATTTACGGCGATGAAGAATC  
TTCCTTAAAAATTA AAAACCGTAGGCGTAACTTTCCTCGCTGATTTCAAATTGCCATAA  
CTCGGTCAATTTTATCCGATTGAGCTGATCTTGTTTTAATCGATGGGCATTGAGTTGA  
TCTTTAAATGAGATCAAGATCATGTCTGTATCTATCTTACTTTCTGAAGTTACAGAACAA  
GTCCCGGTGCTTTTGGGACACCTTATGTA

--

>Btmar2.8.113\_gi-1092445095-gb-MAMS01004506\_1-:220033-220983  
gi-1092445095-gb-MAMS01004506.1-:220033-220983 Bemisia tabaci isolate MEAM1 Scaffold2651,  
whole genome shotgun sequence 951 bp

TACGTAGGGTGTCCCAAAAGTACCGGGACTGGTTCTGTAACCTCAAAGGAAGATAGATA  
CAGACTCTTTTGGTCTCATTTTGAAGATCAACTCAATACCTATCGATTAAAACCAAGATC  
AGCTCAATCGAATAAAAATTGACCGAGTTATGACAATTTGAAATTAGTGAGGAAAGTTTA  
CCCCTACGGTTTTTAGGAAGATTTTCGCTTACCAAGATTCAAAAAGTTAGTATTCGTAT



CCACTTTCCTCCGAATCTTCCATAACTTCCTTTTGCTTTTCAAAGTACCGTCCATCAAAC  
CGGATGCACTTTTTTCATGCGCTCTTGCCACTTATCCAACATTGTTTTCTGAATTCTTCC  
TCTGGGATGGAGTTGAAGAAGTTTTGAATTGCATTCTGGATTTTTGTCTTCGATACGAAT  
CTTCGTCCGCGAAGCTCCTTTTTAAGCGTAGGAAACATCCAAAAATCACATGGAGCCAAG  
TCAGGGCTATAAGGGGGATGAGGGATTGTTTCAACTCCATTTTTACTAATAAATTCACGT  
GTTAAGCTCGATGTGTGAGGCCGCGCATTGTCTTGATGGAGTATCCACGAAGCTTCAAG  
TCCGACCGTTTCCGGGAAATGTGCATTCTCAACTCCTTTAGTACTTTGCAATAATACGCA  
CTGTCAACTGTTGTGTTTGATGGTACAAAATGTTGATAAATGACACCTCGAAAATAAAAA  
AACACAATAAGCATCACTTTATCGGCCGACTTTTCGATTTACGGCGATGAAGAATCTTCC  
TTAAAAACCGTAGGCGTAAACTTTCTCGCTGATTTCAAATTGCCATAACTCGGTCAATT  
TTTATTCGATTGAGCTGATCTTGGTTTTAATCGATGGGTATTGAGTTGATCTTTAAAATG  
AGATCAAGATCATGTCTGTACCTATCTTACTTTCGAAGTTACAGAACAAGT

>Btmar2.8.114\_gi-1092450898-gb-MAMS01001937\_1-:430886-431865

gi-1092450898-gb-MAMS01001937.1-:430886-431865 Bemisia tabaci isolate MEAM1 Scaffold1620,  
whole genome shotgun sequence 980 bp

TACGTAGGGTGTCCCAAAGTACCGGGACTGGTTCTGTAACCTCAAAGTAAGATAGATA  
CAGACATGATTGTGGTCTCATTTTAAAGATCAACTCAATACCTATCGATTAAACCAAGA  
TCAGCTCAATCGGATAAAAATTAACCGAGTTATGACAATTTGAAATCAGTGAGGAAAGTT  
TACCCCTACGGTTTTTAGGAAGATTTTCGCTTACCAGGATTCAAAAAGTTAATATTCGT  
ATCCACTTTCCTCCGAATCTTCCATAACTTCCTTTTGCTTTTCAAAGTACCGTCCATCAA  
ACCGGATGCACTTTTTTCATGCGCTCTTGCCACTTATCCAACATTGTTTTCTGAATTCTT  
CCTCTGGGATGGAGTTGAAGAAGTTTGAATTGCATTCTGGATTTTCGGTCTTCGATACGA  
ATCTTCGTCCGCGAAGCTCCTTTTTAAGCGTAGGAAACATTCAAAAATCACATGGAGCCA  
AGTCAGGGCTGTAAGGGGGATGAGGGATTGTTTCAACTCCATTTTTACTCATAAATTCAC  
GTGTTAAGCTCGACTTGTGAGGCCGCGCATTGTCTTGATGGAGTATCCACGAAGCGTTCA  
AGTCCGACCGTTTCCGGGAAATGTGCATTCTCAACTCCTTTAGTACTTTGCAAAAATACG  
CACTGTCAACTGTTGTGTTTGATGGTACAAAATGTTGATAAAGGACACCTCGAAAATAAA  
AAAACACAATAAGCATCACTTTATGGGCCGACTTTTCGATTTACGGCGATGAAGAATCTT  
CCTTAAAAACCGTAGGCGTAAACTTTCTCCCTGATTTCAAATTGCCATAACTCGGTCAA  
TTTTTATTCGATTGAGCTGATCTTGGTTTTAATCGATAGGTATTGAGTTGATCTTTAAAA

TGAAATCAAGATCATGTCTGTATCTATCTTACTTTTGAAGTTACAGAACCAGTCCCGGTA  
CTTTTGGGACACCTTATGTA

--

>Btmar2.8.115\_gi-1092454785-gb-MAMS01000211\_1-:1461266-1462252  
gi-1092454785-gb-MAMS01000211.1-:1461266-1462252 Bemisia tabaci isolate MEAM1 Scaffold651,  
whole genome shotgun sequence 987 bp

TACGTAGAGTGTCCCAAAAGTATACCGGGACTGGTTCTGTAAGTTCAAAAGTAAGATAGA  
TACAGACATGATTTTGGTCTCATTTTAAAGATCAACTCAATAGGTACCTATCGATTAAAA  
CCAAGATCAGCTCAATCGAATAAAAAATTGACCGAGTTATGACAATTTGTAATTAGTGAGG  
AAAGTTTACCCCAACGGTTTTTAGGAAGATTTTCGCTTACCAGGATTCAAAAAGTTAAT  
ATTCGTATCCACTTTCCTCCGAATCTTCCATAACTTCCTTCGCTTTTCAAAGTACCGTC  
CATCAAACCGGATGCACTTTTTATGCGCTCTTGCCACTTATCCAACATTGTTTTCTGA  
ATTCTCCTCTGGGATGGAGTTGAAGAAGTTTGAATTGCATTCTGGATTTCCGGTCTTCG  
ATACGAATCTTCGTCCGCGAAGCTCCTTTTTAAGCGCAGGAAACATCCAAAAATCACATG  
GAGCCAAGTCAGGGCTATAAGGGGGATGAGGGATTGTTTCAACTCCATTTTACTCATAA  
ATTCACGTGTTAAGCTCGATGTGTGAGGCCGCGCATTGTCTTTGATGGAGTATCCACGAA  
ACTTTCAAGTCCGACCGTTTCCGGGAAATGTGCATTCTCAACTTTTTTAGTACCTTGCAA  
TAATACGCACTGTCAACTGTTGTGTTTGATGGTACAAAATTTTGATAAATGATACCTCGA  
AAATAAAAAAACACAATAAGCATCACTTTATGGGCCGACTTTTCGATTTACGGCGATGAA  
GAATCTTCCTTAAAAACCGTAGGCGTAACTTTCCTCGCTGATTTCAAATTGCCATAACT  
TGGTCAATTTTATCCGATTGAGCTGATCTTGTTTTAATCGATAGGTATTAAGTTGATC  
TTTAAAATGAAATCAAGATCATGTCTGTATCTATCTTACTTTTGAAGTTACAGAACAAGT  
CCCGGTGCTTCTGGGACACCTTACGTA

>Btmar2.8.116\_gi-1092437566-gb-MAMS01008150\_1-:559531-560510  
gi-1092437566-gb-MAMS01008150.1-:559531-560510 Bemisia tabaci isolate MEAM1 Scaffold4159,  
whole genome shotgun sequence 980 bp

TACGTAGGGTGTCCCAAAAGTACCGGGACTGGTTCTGTAAGTTCAAAAGTAAGATAGATA

CAGACATGATTTTGGTCTCATTTTAAAGATCAACTCAATACCTATCGATTAACCAAGA  
TCAGCTCAATCGGATAAAAATTGACCGAGTTATGACAATTGAAATTAGTGAGGAAAGTT  
TACCTCTACGGTTTTTAGGAAGATTTTCGCTTACCAGGATTCAAAAAGTTAATATTCGT  
ATCCACTTTCCTCCGAATCTTCATAACTTCCTTTGCTTTCAAAGTACCGTCCATCAA  
ACCGGATGCACTTTTTCATGCGCTCTTGCCACTTATCCAACATTGTTTCTGAATTCTT  
CCTCTGGGATGGCGTTGAAAAAGTTTGAATTGCATTCTGGATTTCGGTCTTCGATTCTGA  
ATCTTCGTCCACGAAGCTCCTTTTAAAGTGTAGGAAACATCAAAAAATCACATGGAGCCA  
AGTCAGGGCTGTAAGGGGGATGAGGGATTGTTCAACTCCATTTTACTCATAAATTCAC  
GTGTTAAGCTCGATGTGTGAGGCCGCGCTTGCTTGATGGAGTATCCACGAAGCTTCAA  
GTCCGACCGTTTCCGGGAAATGTGCATTCTCAACTCCTTTAGCACTTTCGAATAATACGC  
ACTGTCAACTGTTGTGTTTGGTTGTACAAAATGTTGATAAATGACACCTCGAAAATGAAA  
AAAACACAATAAGCATCACTTTATAGGCCGACTTTTGGATTACGGCGATGAAGAATCTT  
CCTTAAAAACCGTAGGCGTAACTTTCCTCGCTGATTTCAAAGTGCCATAACTTGGTCAA  
TTTTATCCGATTGAGCTGATCTTGGTTTTAATCGATAGGTATTGAGTTGATCTTAAAA  
TGAGATCAAAATCATGTCTGTATCCATCTTACTTTCGAAGTTACAGAACAAGTCCCGGTG  
CTTTTGGGACACCTTTTGTA

--

>Btmar2.8.117\_gi-1092438832-gb-MAMS01007481\_1-:259512-260492  
gi-1092438832-gb-MAMS01007481.1-:259512-260492 Bemisia tabaci isolate MEAM1 Scaffold3891,  
whole genome shotgun sequence 981 bp

TACGTAGGGTGTCCAAAAGTACCGGGACTGGTTCTGTAACCTCAAAAGTAACATAGATA  
CAGACATGATTTTGGTCTCATTTTAAAGATCAACTCAATACCTATCGATTAACCAAGA  
TCAGCTCAATCGGATACAAATTGACCGAGTTATGACAATTGAAATTAGTGAGGAAAGTT  
TACCCCTACGGTTTTTAGGAAGATTTTCGCTTAACCAGGATTCAAAAAGTTAATATTCG  
TATCCACTTTCCTCCGAATCTTCATAACTTCCTTTGCTTTCAAAGTACCGTCCATCA  
AACCGGATGCACTTTTTCATGCGCTCTTGCCACTTATACAACATTGTTTCTGAATTCT  
ACCTCTGGGATGGCGTTGAAAAAGTTTGAATTGCATTCTGGATTTTGGTCTTCGATTCTG  
AATCTTCGTCCACGAAGCTCCTTTTAAAGTGTATGAAACATCAAAAATCACATGGAGCC  
AAGTCAGGGCTGTAAGGGGGATGAGGGATTGTTCAACTCCATTTTACTCATAAATTCA  
CGTGTTAAGCTCGATGTGTGAGGCCGCGCTTGCTTGATGGAGTATCCACGAAGCTTCA

AGTCCGACCGTTTCCGGGAAATGTGCATTCTCAACTCCTTTAGCACTTTGCAATAATACG  
CACTGTCAACTGTTGTGTTTGGTGGTACAAAATGTTGATAAATGACATCTCGAAAATGAA  
AAAAACACAATAAGCATCACTTTATAGGCCGACTTTTCGATTTACGGCGATGAAGAATCT  
TCCTTAAAAACCGTAGGCGTAACTTTCCTAGCTGATTTCAAATTGCCATAACTCGGTCA  
ATTTTATCCGATTGAGCTGATCTTGGTTTTAATCGATAGGTATTGAGTTGATCTTTAA  
ATGAGATCAAGATCATGTCTGTATCTATCTTAGTTTCGAAGTTACAGAACAAGTCCCGGT  
GCTTTTGGGACACCTTTTGTA

>Btmar2.8.118\_gi-1092438832-gb-MAMS01007481\_1-:179692-180420  
gi-1092438832-gb-MAMS01007481.1-:179692-180420 Bemisia tabaci isolate MEAM1 Scaffold3891,  
whole genome shotgun sequence 729 bp

TACGTAGGGTGTCCCAAAGTACCGGGACTGGTTCTGTAACCTCAAATTAAGATAGATA  
CAGACATGATTTTGGTCTCATTTTAAAGATCAACTCAATACCTATCGATTAACCAAGA  
TCAGCTCAATCGAATAAAATTGACCGAGTTATGACAATTTGAAATTAGTGAGGAAAGTT  
TACCCCTACGGTTTTTAGGAAGATTTTCGCTTACCAGGATTTAAAAGTTAATATTCGT  
ATCCACTTTCCTCCGAATCTTCATAACTTCCTTTGCTTTCAAAGTACCGTCCATCAA  
ACCGGATGCACTTTTTATGCGCTCTTGCCACTTATCCAACATTGTTTTCTGAATTATT  
CCTCTGGGATGGAGTTGAAGAAGTTTTGAATTGCATTCTGGATTCGGTCTTCGATACGA  
ATCTTCGTCCGCGAAGCTCCTTTTAAAGCGTGGGAAACATCCAAAAATCACATGGAGCCA  
AGTCAGCGCTATAAGGGGGAAGAGGGATTGTTTCAACTCCATTTTACTCATAAATTCAC  
GTGTTAAGCTCGATGTGTGAGGCTGCGCATTGTTTTGATGGAGTATCCACGGAGCTTTCA  
AGTCCGACGGTTTCCGGGAAATGTGCATTCTCAACTCCTTTACTACTTTGCAATAATACG  
CACTGTCAACTGTTGTGTTTGTATGGTACAAAATGTTGATAAATGACACCTCGAAAATAAA  
AAAACACAA

--

>Btmar2.8.119\*\_gi-1092454194-gb-MAMS01000453\_1-:9062-10051  
gi-1092454194-gb-MAMS01000453.1-:9062-10051 Bemisia tabaci isolate MEAM1 Scaffold10758, whole  
genome shotgun sequence 990 bp

TACGTAGGGTGTCCCAAAGTACCGGGACTGGTTCTGTAACCTCAAAGTCAGATAGATA  
CGGACATGATTTTGGTCTCATTTTAAAGATCAACTCAATACCTATCGATTAACCAAGA  
TCAGCTCAATCGGATAAAATTGACCGAGTTATGACAATTTGAAATTAGTGAGGAAAGTT

TACCCCTACGGTTTTTAGGAAGATTTTCGCTTACCAGGATTCAAAAAGTTAATATTCGT  
ACCCACTTTCCTCCGAATCTTCCATAATTTCTTTTGCTTTTCAAAGTACCGTCCATCAA  
ACCGGATGCACTTTTTCATGCGCTCTTGCCACTTATCCAACATTGTTTTCTGAATTCTT  
CCTCTGGGATGGAGTTGAAGAAGTTTTGAATTGCATTCTGGATTCGGTCTTCGATTCTGA  
ATCTTCGTCGCGAAGCTCCTTTTAAAGCGTAGGAAACATCCAAAAATCACATGGAGCCA  
AGTCAGGGCTATAAGGGGGATTATAGATTGTTTCAACTCCATTTTACTCATAAATTTAC  
GTGTTAAGCTCGATGTGTGAGGCCGCGCATTGTCTTGATGGAGTATCCACGAAGCTTTC  
AGTCCGACCGTTTCCGGGAAATGTGCATTCTCAACTCCTTTAGCACTTTGCAATAATACG  
CACTGTCAACTGTTGTGTTTGGTGGTACAAAATATTGATAAATGACACCTCGAAAATAAA  
AAACACAATAAGCATCACTTTATAGGCCGACTTTTCGATTTACGGCGATGAAGAATCTT  
CCTTAAAAACCGTAGGCGTAAACTTTCTCGCTGATTTCAAATTGCCATAACTCGGTCAA  
TTTTTATCCGATTGAGCTGATCTTGGTTTTAATCGATAGGTATTGATAGGTATTGAGTTG  
ATCTTTAAATGAGATCAAGATCATGTCTGTATCTATCTTACTTTTGAAGTTACAGAACA  
AGTCCCGGTGCTTTTGGGACACCTTATGTA

--

>Btmar2.8.120\_gi-1092455242-gb-MAMS01000093\_1-:1060689-1061643  
gi-1092455242-gb-MAMS01000093.1-:1060689-1061643 Bemisia tabaci isolate MEAM1 Scaffold317,  
whole genome shotgun sequence 955 bp

TACGTAGGGTGTCCCAAAAGTACCGGGACTGGTTCTGTAACCTCAAAAGTAAGATAGATA  
CAGACATGATTTTGGTCTCATTTTGAAGATCAACTCAAACTATCGATTAAACCAAGAT  
CAGCTCAATCGAATAAAAATTGACCGAGTTATGACAATTTGAAATTAGTGAGGAAAGTTT  
ACCCCTACGGTTTTTAGGAAGATTTTTCGCTTACCAGGATTCAAAAAGTTAATATTCCTA  
TCCACTTTCCTCCGAATCTTCCAAAACCTCCTTTTGCTTTTCAAAGTACCGTCCATCAAA  
CCGGATGCACTTTTTCATGCGCTCTTGCCACTTATCCAACATTGTTTTCTGAATTCTTC  
CTCTGGGATGGAGTTGAAAAAGTTTTGAATTGCATTCTGGATTCGGTCTTCGATACGAA  
TCTTCGTCGCGAAGCTCCTTTTAAAGCGTAGGAAACATCCAAAAATCACATGGAGCCAA  
GTCAGGGCTATAAGGGGGATGAGGGATTGTTTCAACTCCATTTTACTCATAAATTCACG  
TGTTAAGCTCGATGTGTGAGGCCGCGCATTGTCTTGATGGAGTATCCACGAAGCTTTC  
GTCCGACCGTTTCCGGGAAATGTGCATTCTCAACTCCTTTAGTACTTTGCAATAATACGC  
ACTGTCAACTGTTGTGTTTGGTGGTACAAAATGTTGATAAATGACACCTCGAAAATAAAA

AAACACAATAAGCATCACTTTATCGGCCGATTTTTTCGATTACGGCGATGAAGAATCTTC  
TTTAAAAACCGTAGGGGTAACTTTCTCGCTGACTTCAAATTGCCATAACTCGGTC  
AATTTTTATCCGACTGAGCTGATCTTGGTTTTAATCGATGGGTATTGAGTTGATCTTTAA  
AATGAAATCAAGAGCATGTCTGTATCTATCTTACTTTTGAAGTTACAGAACAAAGT

>Btmar2.9.1\_gi-1092455116-gb-MAMS01000124\_1-:518461-519442  
gi-1092455116-gb-MAMS01000124.1-:518461-519442 Bemisia tabaci isolate MEAM1 Scaffold403, whole  
genome shotgun sequence 982 bp

TACATAAGGTGTCCCAAACGCACCGGGACTTGTTCTGTAACCTCGAAAGTAAGATAGATA  
CAGACATGATTTTAATCTCATTTTAAAGATCAACTCAATACCTATCGATTAAAACCAAGA  
TCAGCTCAATCGGATAAAAATTGACCGAGTTATATGGCAATTTGAAATCAGCAAGGAAAG  
TTTACGCCTACGGTTTTTAAGGAAGATTCTTCATCGCCGTAAATCGAAAAGTCGGCCGAT  
AAAGTGATGCTTATTGTGTTTTTTATTTTCGAGGTGTCATTTATCAACATTTTGTACCA  
TCAAACACAACAGTTGACAGTGCGTATTATTGCAAAGTACTAAAGGAGTTGAGAATGCAC  
ATTTCCCGGAAACGGTCGGACTTGAAAGCTTCGTGGATACTCCATCAAGACAATGCGCGG  
CCTCACACATCGAGCTTAACACGTGAATTTATGAGTAAAAATGGAGTTGAAACAATCCCT  
CATCCCCCTTATAGCCCTGACTTGGCTCCATGTGATTTTTGGATGTTTCCTACGCTTAAA  
AAGGAGCTTCGCGGACGAAGATTCGTATCGAAGACCGAAATCCAGAATGCAATTCAAAAC  
TTCTTCAACTCCATCCCAGAGGAAGAATTCAGGAAAACAATGTTGGATAAGTGGAAGAG  
CGCATGAAAAAGTGATCCGGTTTGATGGACGGTACTTTGAAAAGCAAAAGGAAGTTATG  
GAAGATTCGGAGGAAAGTGGATACGAATATTAACTTTTTGAATCCTGGTAAGCGAAAAAT  
CTTCCTAAAAACCGTAGGGGTAACTTTCTCACTAATTTCAAATTGTCATAACTCGGTC  
AATTTTTATTGATTGAGCTGATCTTGGTTTTAATCGATAGGTATTGAGTTGATCTTTAA  
AATGAGACCAAAATCATGTCTGTATCTATCTTACTTTTGAAGTTACAGAACCAGTCCCGG  
TACTTTTGGGACACCCTACGTA

--

>Btmar2.9.2\_gi-1092454721-gb-MAMS01000233\_1-:433576-434556  
gi-1092454721-gb-MAMS01000233.1-:433576-434556 Bemisia tabaci isolate MEAM1 Scaffold699, whole  
genome shotgun sequence 981 bp

TACATAAGGTGTCCCAAAGCACCGGGACTTGTTCTGTAACCTCGAAAGTAAGATAGATA  
CAGACATGATCTTGATTTTCAATTTAAAGATCAACTCAATACCTATCGATTAAAACCAAGA

TCAGCTCAATCGGATAAAAATTGACCGAGTTATGGCAATTTGAAATCAGCGAGGAAAAGTT  
TACGCCTACGGTTTTTAAGGAAGATTCTTCATCGCCGTAAATCGAAAAGTCGGCCGATAA  
AGTGATGCTTATTGTGTTTTTTATTTTCGAGGTGTCATTTATCAACATTTTGTACCATC  
AAACACAACAGTTGACAGTGCGTATTATTGCAAAGTACTAAAGGAGTTGAGAATGCACAT  
TTCCCGGAAACGGTCGGACTTGAAAGCTTCGTGGATACTCCATCAAGACAATGCGCGGCC  
TCACACATCGAGCTTAACACGTGAATTTATGAGTAAAAATGGAGTTGAAACAATCCCTCA  
TCCCCCTTATAGCCCTGACTTGGCTCCATGTGATTTTTGGATGTTTCCTGCGCTTAAAAA  
GGAGCTTTCGCGGACGAAGATTCGTATCGAAGACAAAAATCCAGAATGCAATTCAAAAT  
TCTTCAACTCCATCCCAGAGGAAGAATTCAGGAAAACAATGTTGGATAAGTGGCAAGAGC  
GCATGAAAAAGTGCATCCGGTTTGATGGACGGTACTTTGAAAAGCAAAAGGAAGTTATGG  
AAGATTCGGAGGAAAGTGGATACGAATATTAACTTTTGAATTCTGGTAAGCGAAAAATC  
TTCCTAAAAACCGTAGGGGTAACTTTCCTCACTAATTTCAAATTGTCATAACTCGGTCA  
ATTTTTATTCAATTGAGCTGATCTTGGTTTTAATCGATAGGTATTGAGTTGATCTTTAA  
ATGAGACCAAAATCATGTCTGCATCTATCTTACTTTTGAAGTTACAGAACCAGTCCCGGT  
ACTTTTGGGACACCCTACGTA

--

>Btmar2.9.3\_gi-1092454721-gb-MAMS01000233\_1-:448500-449234

gi-1092454721-gb-MAMS01000233.1-:448500-449234 Bemisia tabaci isolate MEAM1 Scaffold699, whole  
genome shotgun sequence 735 bp

TGCGTTTTGTGTTTTTTATTTTCGAGGTGTCATTTATCAACATTTTGTACCATCAAACA  
CAACAGTTGACAGTGCGTATTATTGCAAAGTAGTAAAGGAGTTGAGAATGCACATTTCCC  
GGAAACCGTCGGACTTGAAAGCTCCGTGGATACTCCATCAAAACAATGCGCAGCCTCACA  
CATCGAGCTTAACACGTGAATTTATGAGTAAAAATGGAGTTGAAACAATCCCTCATCCCC  
CTTATAGCGCTGACTTGGCTCCATGTGATTTTTGGATGTTTCCCACGCTTAAAAAGGAGC  
TTCGCGGACGAAGATTCGTATCGAAGACCGAAATCCAGAATGCAATTCAAAATTCTTCA  
ACTCCATCCCAGAGGAATAATTCAGGAAAACAATGTTGGATAAGTGGCAAGAGCGCATGA  
AAAAGTGCATCCGGTTTGATGGACGGTACTTTGAAAAGCAAAAGGAAGTTATGGAAGATT  
CGGAGGAAAGTGGATACGAATATTAACTTTTTAAATCCTGGTAAGCGAAAAATCTTCCTA  
AAAACCGTAGGGGTAACTTTCCTCACTAATTTCAAATTGTCATAACTCGGTCAATTTTT  
ATTGATTGAGCTGATCTTGGTTTTAATCGATAGGTATTGAGTTGATCTTTAAATGAGA

CCAAAATCATGTCTGTATCTATCTTAATTTTGAAGTTACAGAACCAAGTCCCGGTACTTTT  
GGGACACCCTACGTA

--

>Btmar2.9.4\_gi-1092455288-gb-MAMS01000087\_1-:5165538-5166517  
gi-1092455288-gb-MAMS01000087.1-:5165538-5166517 Bemisia tabaci isolate MEAM1 Scaffold297,  
whole genome shotgun sequence 980 bp

TACATAAGGTGTCCCAAAGCACCGGGACTTGTTCTGTAACCTCGAAAGTAAGATAGATA  
CAGACATGATCTTGATTTCAATTTAAAGATCAACTCAATACCTATCGATTAAAACCAAGA  
TCAGCTCAATCGGATAAAAATTGACCGAGTTATGGCAATTTAAAATCAGCGAGGAAAAGTT  
TACGCCTACGGTTTTTAAGGAAGATTCTTCATCGCCGTAAATCGAAAAGTCGGCCGATAA  
AGTGATGCTTATTGTGTTTTTTATTTTCGAGGTGTCATTTATCAACATTTTGTACCATC  
AAACACAACAGTTGACAGTGCGTATTATTGCAAAGTACTAAAGGAGTTGAGAATGCACAT  
TTCCCGGAAACGGTCGGACTTGAAAGCTTCGTGGATACTCCATCAAGACAATGCGCGGCC  
TCACACATCGAGCTTAACACGTGAATTTATGAGTAAAAATGGAGTTGAAACAATCCCTCA  
TCCCTCTTATAGTCCTGACTTGGCTCCATGTGATTTTTGGATGTTTCCTGCGCTTAAAAA  
GGAGCTTCGCGGACGAAGATTCGTATCGAAGACAAAAATCCAGAATGCAATTCAAACCTT  
CTTCAACTCCATCCCAGAGGAAGAATTCAGGAAAACAATGTTGGATAAGTGGCAAGAGCG  
CATGAAAAAGTGCATCCGGTTTGATGGACGGTACTTTGAAAAGCAAAAGGAAGTTATGGA  
AGATTCCGAGGAAGGTGGATACGAATATTAACTTTTGAATCCTGGTAAGCGAAAAATCT  
TCCTAAAAACCGTAGGGGTAACTTTCCTACTAATTTCAAATTGTCATAACTCGGTCAA  
TTTTTATTCGATTGAGCTGATCTTGTTTTAATCGATAGGTATTGAGTTGATCTTTAAAA  
TGAGACCAAAATCATGTCTGTATCTATCTTACTTTTGAAGTTACAGAACCAAGTCCCGGTA  
CTTTTGGGACACCCTACGTA

--

>Btmar2.9.5\_gi-1092455288-gb-MAMS01000087\_1-:5197937-5198916  
gi-1092455288-gb-MAMS01000087.1-:5197937-5198916 Bemisia tabaci isolate MEAM1 Scaffold297,  
whole genome shotgun sequence 980 bp

TACATAAGGTGTCCCAAAGCACCGGGACTTGTTCTGTAACCTCGAAAGTAAGATAGATA  
CAGACATGATCTTGATTTCAATTTAAAGATCAACTTAATACCTATCGATTAAAACCAAGA



TCAGCTCAATCGGATAAAAATTGACCGAGTTATGGCAATTTGAAATCAGCGAGGAAAAGTT  
TACGCCTACGGTTTTTCAGGAAGATTCTTCATCGCCGTAAATCGAAAAGTCGGCCGATAA  
AGTGATGCTTATTGTGTTTTTTATTTTCGAGGTGTCATTTATCAACATTTTGTACCATC  
AAACACAACAGTTGACAGTGCGTATTATTGCAAAGTACTAAAGGAGTTGAGAATGCACAT  
TTCCCGGAAACGGTCGGACTTGAAAGCTTCGTGGATACTCCATCAAGACAATGCGCGGCC  
TCACACATCGAGCTTAACACGTGAATTTATAAGTAAAAATGGAGTTGAAACAATCCCTCA  
TCCCCCTTATAGCCCTGACTTGGCTCCATGTGATTTTTGGATGTTTCCTACGCTTAAAAA  
GGAGCTTCGCGGACGAAGATTCGTATCGAAGACCGAAATCCAGAATGCAATTCAAAACCTT  
CTTCAACTCCATCCCAGAGGAAGAATTCAGGAAAACAATGTTGGATAAGTGGCAAGAGCG  
CATGAAAAAGTGCATCCGGTTTGATGGACGGTACTTTGAAAAGCGAAAGGAAGTTATGGA  
AGATTTCGGAGGAAAGTGGATAGGAATATTAACCTTTTTGAATCCTGGTAAGCGAAAAATCT  
TCCTAAAAACCGTAGGGGTAACTTTCCTACTAATTTCAAATTGTCATAACTCGGTCAA  
TTTTTATTCGATTGAGCTGATCTTGGTTTTAATCGATAGGTATTGAGTTGATCTTTAAAA  
TGAGACCAAAATCATGTCTGCATCTATCTTACTTTTGAAGTTACAGAACCAGTCCCGGTA  
CTTTTGGGACACCCTACGTA

>Btmar2.9.6\_gi-1092455288-gb-MAMS01000087\_1-:4679684-4680663  
gi-1092455288-gb-MAMS01000087.1-:4679684-4680663 Bemisia tabaci isolate MEAM1 Scaffold297,  
whole genome shotgun sequence 980 bp

TACATAAGGTGTCCCAAAGCACCGGGACTTGTTCTGTAACCTTCGAAAGTAAGATAGATA  
CAGACATGATCTTGATTTCATTTTAAAGATCAACTTAATACCTATCGATTAAAACCAAGT  
TCAGCTCAATCGGATAAAAATTGACCGAGTTATGGCAATTTGAAATCAGCGAGGAAAAGTT  
TACGCCTACGGTTTTTCAGGAAGATTCTTCATCGCCGTAAATCGAAAAGTCGGCCGATAA  
AGTGATGCTTATTGTGTTTTTTATTTTCGAGGTGTCATTTATCAACATTTTGTACCATC  
AAACACAACAGTTGACAGTGCGTATTATTGCAAAGTACTAAAGGAGTTGAGAATGCACAT  
TTCCCGGAAACGGTCGGACTAGAAAGCTTCGTGGATACTCCATCAAGACAATGCGCGGCC  
TCACACATCGAGCTTAACACGTGAATTTATAAGTAAAAATGGAGTTGAAACAATCCCTCA  
TCCCCCTTATAGCCCTGACTTGGCTCCATGTGATTTTTGGATGTTTCCTACGCTTAAAAA  
GGAGCTTCGCGGACGAAGATTCGTATCGAAGACCGAAATCCAGAATGCAATTCAAAACCTT  
CTTCAACTCCATCCCAGAGGAAGAATTCAGGAAAACAATTTTGGATAAGTGGCAAGAGCG  
CATGAAAAAGTGCATCCGGTTTGATGGACGGTACTTTGAAAAGCGAAAGGAAGTTATGGA

AGATTTCGAGGAAAGTGGATAGGAATATTAACCTTTTTGAATCCTGGTAAGCGAAAAATCT  
TCCTAAAAACCGTAGGGGTAACTTTCCTCACTAATTTCAAATTGTCATAACTCGGTCAA  
TTTTTATTGATTGAGCTGATCTTGGTTTTAATCGATAGGTATTGAGTTGATCTTTAAAA  
TGAGACCAAAATCATGTCTGCATCTATCTTACTTTTGAAGTTACAGAACCAGTCCCGGTA  
CTTTTGGGACACCCTACGTA

>Btmar2.9.7\_gi-1092455288-gb-MAMS01000087\_1-:5426487-5427466  
gi-1092455288-gb-MAMS01000087.1-:5426487-5427466 Bemisia tabaci isolate MEAM1 Scaffold297,  
whole genome shotgun sequence 980 bp

TACGTAAGGTGTCCCAAAGCACCGGGACTTGTTCTGTAACCTCGAAAGTAAGATAGATA  
CAGACATGATACTGATTTTCATTTTAAAGATCAACTCAATACCTATCGATTTAAACCAAGA  
TCAGCTCAATCGGATAAAAATTGACCGAGTTATGGCAATTTGAAATCAGCGAGGAAAAGTT  
TACGCCTACGGTTTTTAAGGAAGATTCTTCATCGCCGTAAATCGAAAAGTCGGCCGATAA  
AGTGATGCTTATTGTGTTTTTTATTTTCGAGGTGTCATTTATCAACATTTGTACCGTC  
AAACACAACAGTTGACAGTGCGTATTATTGCAAAGTACTAAAGTAGTTGAGAATGCACAT  
TTCCCGGAAACGGTCGGACTTGAAAGCTTCGTGGATACTCCATCAAGACAATGCGCGGCC  
TCACACATCGAGCTTAACACGTGAATTTATGAGTAAAAATGGAGTTGAAACAATCCCTCA  
TCCCCCTAATAGCGCTGACTTGGCTCCATGTGATTTTGGGATGTTTCTCACGCTTAAAAA  
GGAGTTTCGCGGACGAAGATTCGTATCGAAGACCGAAATCCAGAATGCAATTCAAAACCTT  
CTTCAACTCCATCCCAGAGGAAGAATTCAGGAAAACAATGTTGGATAAGTGGCAAGAGCG  
CATGAAAAAGTGCATCCGGTTTGATGGACGGTACTTTGAAAAGCAAAAGGAAGTTATGGA  
AGATTTCGAGGAAAGTGGATACGAATATTAACCTTTTTGAATCCTGGTAAGCGAAAAATCT  
TCCTAAAAACCGTAGGGGTAACTTTCCTCACTAATTTCAAATTGTCATAACTCGGTACG  
TTTTTATCCGATTGAGCTGATCTTGGTTTTAATCGATAGGTATTGAGTTGATCTTTAAGA  
TGAGACCAAAATCATGTCTGCATCTATCTTACTTTTGAAGTTACAGAACCAGTCCCGGTA  
CTTTTGGGACACCCTACGTA

>Btmar2.9.8\*\_gi-1092455288-gb-MAMS01000087\_1-:4752060-4753042  
gi-1092455288-gb-MAMS01000087.1-:4752060-4753042 Bemisia tabaci isolate MEAM1 Scaffold297,  
whole genome shotgun sequence 983 bp

TACATAAGGTGTCCCAAAGCACCGGGACTTGTTCTGTAACCTCGAAAGTAAGATAGATA  
CAGACATGATCTTGATTTTCATTTTAAAGATCAACTCAATACCTATCGATTTAAACCAAGA

TCAGCTCAATCGGATAAAAATTGACCGAGTTATGGCAATTTGAAATCAGCGAGGAAAAGTT  
TACGCCTACGGTTTTTAAGGAAGATTCTTCATCGCCGTAAATCGAAAAGTCGGCCTATAA  
AGTGATGCTTATTGTGTTATTTATTTTCGAGGTGTCATTTAAGTATCAACATTTTGTAC  
CACCAAACACAACAGTTGAGAGTGCGTATTATTGCAAAGTGCTAAAGGAGTTGAGAATGC  
ACATTTCCCGGAAACGGTCGGACTTGAAAGCTTCGTGGATACTCCATCAAGACAAGCGCG  
GCCTCACATATCGAGCTTAACACGTGAATTTATGAGTAAAAATGGAGTTGAAACAATCCC  
TCATCCCCCTTACAGCCCTGACTTGGCTCCATGTGATTTTTGGATGTTTCCTACGCTTAA  
AAAGAAGCTTCGCGGACGAAGATTCTGAATCGAAGACCGAAATCCAGAATGCAATTCAAAA  
CTTTTCAACGCCATCCCAGAGGAAGAATTCAGGAAAACAATGTTGGATAAGTGGCAAGA  
GCGCATGAAAAAGTGCATCCGGTTTGATGGACGGTACTTTGAAAAGCAAAAGGAAGTTAT  
GGAAGATTCGGAGGAAAAGTGGATACGAATATTAACTTTTGAATCCTGGTAAGCGAAAAA  
TCTTCCTAAAAACCGTAGGGGTAACTTTCCTCACTAAATTCAAATTGTCATAACTCGGT  
CAATTTTTATCCGATTGAGCTGATCTTGTTTTAATCGATAGGTATTGAGTTGATCTTTA  
AAATGAGACCAAAATCATGTCTGTATCTATCTTACTTTTGAAGTTACAGAACCAGTCCCG  
GTACTTTTGGGACACCCGACGTA

--

>Btmar2.9.9\_gi-1092454650-gb-MAMS01000255\_1-:1168428-1169408  
gi-1092454650-gb-MAMS01000255.1-:1168428-1169408 Bemisia tabaci isolate MEAM1 Scaffold98,  
whole genome shotgun sequence 981 bp

TACATAAGGTGTCCCAAAGCACCGGGACTTGTTCTGTAACCTCGAAAGTAAGATAGATA  
CAGACATGATCTTGATTTTCAATTTAAAGATCAACTCAATACCTATCGATTAAAACCAAGA  
TCAGCTCAATCGGATAAAAATTGACCGAGTTATGGCAATTTGAAATCAGCGAGGAAAAGTT  
TACGCCTACGGTTTTTAAGGAAGATTCTTCATCGCCGTAAATCGAAAAGTCGGCCGATAA  
AGTGATGCTTATTGTGTTTTTTATTTTCGAGGTGTCATTTATCAACATTTTGTACCATC  
AAACACAACAGTTGACAGTGCGTATTATTGCAAAGTAAAGGAGTTGAGAATGCACAT  
TTCCCGGAAACGGTCGGACTTGAAAGCTTCGTGGATACTCCATCAAGACAATGCGCGGCC  
TCACACATCGAGCTTAACACGTGAATTTATAAGTAAAAATGGAGTTGAAACAATCCCTCA  
TCCCCCTTATAGCCCTGACTTGGCTCCATGTGATTTTTGGATGTTTCCTACGCTTAAAAA  
GGAGCTTCGCGGACGAAGATTCGTATCGAAGACCGAAATCCAGAATGCAATTCAAACCTT  
CTTCAACTCCATCCCAGAGGAAGAATTCAGGAAAACAATGTTGGATAAGTGGCAAGAGCG

CATGAAAAAGTGCATCCGGTTTGATGGACGGTACTTTGAAAAGCAAAAGGAAGTTATGGA  
AGATTTCGGAGGAAAAGTGGATACGAATATTAACCTTTTTGAATTCTGGTAAGGGAAAAATCT  
TCCTAAAAACCGTAGGGGTAACTTTCCTCACTGATTTCAAATTGTCATTTACTCGGTCA  
ATTTTTATTCGATTGAGCTGATCTTGGTTTCAATCGATAGGTATTGAGTTGATCTTTAAA  
ATGAGACCAAAATCATGTCTGTATCTATCATACTTTTGAAGTTACAGAACCAGTCCCGGT  
ACTTTTGGGACACCCTACGTA

--

>Btmar2.9.10\_gi-1092455591-gb-MAMS01000016\_1-:2433534-2434486  
gi-1092455591-gb-MAMS01000016.1-:2433534-2434486 Bemisia tabaci isolate MEAM1 Scaffold132,  
whole genome shotgun sequence 953 bp

ACTTGTTCTGTAACCTTCGAAAGTAAGATAGATACAGACATGATCTTGATTTTATTTTAAA  
GATCAACTCAATACCCATCGATTAAAACCAAGATCAGCTCAATCGGATAAAAATTGACCG  
AGTTATGGCAATTTGAAATCAGCGAGGAAAGTTACGCCTACGGTTTTTAAGGAAGATTC  
TTCATCGCCGTAAATCGAAAAGTCGGCCGATAAAGTGATGCTTGTTGTGTTTTTTTATTT  
TCGAGGTGTCATTTATCAACATTTTGTACCATCAAACACAACAGTTGACAGTGCGTATTA  
TTGCAAAGTACTAAAGGAGTTGAGAATGCACATTTCCCGGAAACGGTCGGACTTGAAAGC  
TTCGTGGATACTCCATCAAGACAATGCGCGGCCTCACACATCGAGCTTAACACGTGAATT  
TATAAGTAAAAATGGAGTTGAAACAATCCCTCATCCCCCTTATAGCCCTGACTTGGCTCC  
ATGTGATTTTTGGATGTTTCCTACGCTTAAAAAGGAGCTTCGCGGACGAAGATTCGTATC  
GAAGACCGAAATCCAGAATGCAATTCAAAACCTTTTTCAACTCCATCCCAGAGGAAGAATT  
CAGGAAAACAATGTTGGATAAGTGGCAAGAGCGCATGAAAAGTGCATCCGGTTTGATGG  
ACGGTACTTTGAAAAGCAAAATGAAGATATGGAAGATTCGGAGGAAAGTGGATAGGAATA  
TTAACTTTTTGAATCCTGGTAAGCGAAAAATCTTCCTAAAAACCGTAGGGGTAACTTTC  
CTCACTAATTTCAAATTGTCATAACTCGGTCAATTTTTATTCGATTGAGCTGATCTTGGT  
TTTAATCGATAGGTATTGAGTTGATCTTTAAAATGAAACCAAAATCATGTCTGTATCTAT  
CTTACTTTTGAAGTTACAGAACCAGTCCCGGTACTTTTGGGACACCCTACGTA

--

>Btmar2.9.11\_gi-1092449997-gb-MAMS01002403\_1-:5649-6628  
gi-1092449997-gb-MAMS01002403.1-:5649-6628 Bemisia tabaci isolate MEAM1 Scaffold1805, whole  
genome shotgun sequence 980 bp

TACAAAAGGTGTCTCAAAAGCACCGGGACTTGTTCTGTAACCTCGAAAGTAAGATGGATA  
CAGACATGATCTTGATCTCATTTTAAAGATCAACTCAATACCTATCGATTAAAACCAAGA  
TCAGCTCAATCGGATAAAAATTGACCAAGTTATGGCACTTTGAAATCAGCGAGGAAAAGTT  
TACGCCTACGGTTTTTAAGGAAGATTCTTCATCGCCGTAAATCGAAAAGTCGGCCTATAA  
AGTGATGCTTATTGTGTTTTTTTCATTTTCGAGGTGTCATTTATCAACATTTTGTACCAC  
CAAACACAACAGTTGACAGTGCGTATTATTGCAAAGTGCTAAAGGAGTTGAGAATGCACA  
TTCCCGGAAACGGTCGGACTTGAAAGCTTCGTGGATACTCCATCAAGACAAGCGCGGCC  
TCACACATCGAGCTTAACACGTGAATTTATGAGTAAAAATGGAGTTGAAATAATCCCTCA  
TCCCCCTTACAGCCCTGACTTGGCTCCATGTGATTTTTGGATGTTTCCTACACTTAAAAA  
GGAGCTTCGTGGACGAAGATTGGAATCGAAGACCGAAATCCAGAATGCAATTCAAACCTT  
TTTCAACGCCATCCCAGAGAAAGAATTCAGGAAAACAATGTTGGATAAGTGGAAGAGCG  
CATGAAAAAGTGCATCCGGTTTGATGGACGGTACTTTGAAAAGCAAAAGGAAGTTATGGA  
AGATTCGGAGGAAAGTGGATACGAATTTTAACTTTTTGAATCCTGGTAAGCGAAAAATCT  
TCCTAAAAACCGTAGGGGTAACTTTCCTCACTAATTTCAAATTGTCATAACTCGGTCAA  
TTTTTATTCGATTGAGCTGATCTTGGTTTTAATCGATAGGTATTGAGTTGATCTTTAAAA  
TGAGACCAAAATCATGTCTGTATCTATCTTACTTTTGAAGTTACAGAACCAGTCCCGGTA  
CTTTTGGGACACCCTACGTA

--

>Btmar2.9.12\_gi-1092450877-gb-MAMS01001951\_1-:6087343-6088322  
gi-1092450877-gb-MAMS01001951.1-:6087343-6088322 Bemisia tabaci isolate MEAM1 Scaffold16276,  
whole genome shotgun sequence 980 bp

TACATAAGGTGTCCCAAAGCACCGGGACTTGTTCTGTAACCTCGAAAGTAAGATAGATA  
CAGACATGATCTTGATTTTCAATTTTAAAGATCAACTCAATACCTATCGATTAAAACCAAGA  
TCAGCTCAATCGGATAAAAATTGACCGAGTTATGGCAATTTGAAATCAGCGAGGAAAAGTT  
TACGCCTACGGTTTTTAAGGAAGATTCTTCATCGCCGTAAATCGAAAAGTCGGCCGATAA  
AGTGATGCTTATTGTGTTTTTTTATTTTCGAGGTGTCATTTATCAACATTTTGTACCATC  
AAACACAACAGTTGACAGTGCGTATTATTGCAAAGTAAAGGAGTTGAGAATGCACAT

TTCCCGGAAACGGTCGGACTTGAAAGCTTCGTGGATACTCCATCAAGACAATGCGCGGCC  
TCACACATCGAGCTTAACACGTGAATTTATGAGTAAAAATGGAGTTGAAACAATCCCTCA  
TCCCCCTTATAGCCCTGACTTGGCTCCATGTGATTTTTGGATGTTTCCTGCGCTTAAAAA  
GGAGCTTCGCGGACGAAGATTCGTATCGAAGACAAAAATCCAGAATGCAATTCAAACCTT  
CTTCAACTCCATCCCAGAGGAAGAATTCAGGAAAACAATGTTGGATAAGTGGCAAGAGCG  
CATGAAAAAGTGCATCCGGTTTGATGGACGGTACTTTGAAAAGCAAAAGGAAGTTATGGA  
AGATTTCGGAGGAAAGTGGATACGAATATTAACCTTTTTGAATCCTGGTAAGCGAAAAATCT  
TCCTAAAAACCGTAGGGGTAACTTTCTCTACTAATTTCAAATTGTCATAACTCGGTCAA  
TTTTTATTCGATTGAGCTGATCTTGGTTTTAATCGATAGGTATTGAGTTGATCTTTAAAA  
TGAGACCAAAATCATGTCTGCATCTATCTTACTTTTGAAGTTACAGAACCAGTCCCGGTA  
CTTTTGGGACACCCTACGTA

--

>Btmar2.9.13\_gi-1092455496-gb-MAMS01000029\_1-:5031260-5032239  
gi-1092455496-gb-MAMS01000029.1-:5031260-5032239 Bemisia tabaci isolate MEAM1 Scaffold165,  
whole genome shotgun sequence 980 bp

TACATAAGGTGTCCCAAAGCACCGGGACTTGTTCTGTAACCTCGAAAGTAAGATAGATA  
CAGACATGATCTTGATTTTCAATTTAAAGATCAACTCAATACCTATCGATTAAAACCAAGA  
TCAGCTCAATCGGATAAAAATTGACCGAGTTATGGCAATTTGAAATCAGCGAGGAAAAGTT  
TACGCCTACGGTTTTTAAGGAAGATTCTTCATCGCCGTAAATCGAAAAGTCGGCCGATAA  
AGTGATGCTTATTGTGTTTTTTATTTTCGAGGTGTCATTTATCAACATTTTGTACCATC  
AAACACAACAGTTGACAGTGCGTATTATTGCAAAGTACTAAAGGAGTTGAGAATGCACAT  
TTCCCGGAAACGGTCGGACTTGAAAGCTTCGTGGATACTCCATCAAGACAATGCGCGGCC  
TCACACATCGAGCTTAACACGTGAATTTATGAGTAAAAATGGAGTTGAAACAATCCCTCA  
TCCCCCTTATAGCCCTGACTTGGCTCCATGTGATTTTTGGATGTTTCCTACGCTTAAAAA  
GGAGCTTCGCGGACGAAGATTCGTATCGAAGACCGAAATCCAGAATGCAATTCAAACCTT  
CTTCAACTCCATCCCAGAGGAAGAATTCAGGAAAACAATGTTGGATAAGTGGCAAGAGCG  
CATGAAAAAGTGCATCCGGTTTGATGGACGGTACTTTGAAAAGCAAAAGGAAGTTATGGA  
AGATTTCGGAGGAAAGTGGATACGAATATTAACCTTTTTGAATCCTGGTAAGCGAAAAATCT  
TCCTAAAAACCGTAGGGGTAACTTTCTCTACTAATTTCAAATTGTCATAACTCGGTCAA  
TTTTTATTCGATTGAGCTGATCTTGGTTTTAATCGATAGGTATTGAGTTGATCTTTAAAA

TGAGACCAAATCATGTCTGTATCTATCTTACTTTGAAGTTACAGAACCAGTCCCGGTA  
CTTTGGGACACCCTACGTA

>Btmar2.9.14\_gi-1092455496-gb-MAMS01000029\_1-:1038376-1039356  
gi-1092455496-gb-MAMS01000029.1-:1038376-1039356 Bemisia tabaci isolate MEAM1 Scaffold165,  
whole genome shotgun sequence 981 bp

TACATAAGGTATCCCAAAGCACCGGGACTTGTTCTGTAACCTCGAAAGTAAGATAGATA  
CAGACATGATCTTGATTTTCAATTTAAAGATCAACTCAATACCTATCGATTAAACCAAGA  
TCAGCTCAATCGGATAAAAATTGACCGAGTTATGGCAATTTGAAATCAGCGAGGAAAGTT  
TACGCCTACGGTTTTTAAGGAAGATTCTTCATCGCCGTAAATCGAAAAGTCGGCCGATAA  
AGTGATGCTTATTGTGTTTTTTTATTTTCGAGGTGTCATTTATCAACATTTTGTACCAT  
CAAACACAACAGTTGACAGTGCGTATTATTGCAAAGTACTAAAGGAGTTGAGAATGCACA  
TTCCCGGAAACGGTCGGACTTGAAAGCTTCGTGGATACTCCATCAAGACAATGCGCGGC  
CTCACACATCGAGCTTAACACGTGAATTTATGAGTAAAAATGGAGTTGAAACAATCCCTC  
ATCCCTCTTATAGTCCTGACTTGGCTCCATGTGATTTTTGGATGTTTCCTGCGCTTAAAA  
AGGAGCTTCGCGGACAAAGATTTCGTATCGAAGACAAAAATCCAGAATGCAATTCAAACT  
TCTTCAACTCCATCCCAGAGGAAGAATTCAGGAAAACAATGTTGGATAAGTGGCAAGAGC  
GCATGAAAAAGTGATCCGGTTTGATGGACGGTACTTTGAAAAGCAAAAGGAAGTTATGG  
AAGATTCGGAGGAAAGTGGATACGAATATTAATTTTTGAATCCTGGTAAGCGAAAAATC  
TTCCTAAAAACCGTAGGGGTAACTTTCCTCACTAATTTCAAATTGTCATAACTCGGTCA  
ATTTTTATTCGATTGAGCTGATCTTGGTTTTAATCGATAGGTATTGAGTTGATCTTTAAA  
ATGAGACCAAATCATGTCTGTATCTATCTTACTTTTGAAGTTACAGAACCAGTCCCGGT  
ACTTTTGGGACACCCTACGTA

--

>Btmar2.9.15\_gi-1092450672-gb-MAMS01002091\_1-:64277-65257  
gi-1092450672-gb-MAMS01002091.1-:64277-65257 Bemisia tabaci isolate MEAM1 Scaffold1685, whole  
genome shotgun sequence 981 bp

TACATAAAGTGTCCCAAAGCACCGGGACTTGTTCTGTAACCTCAAAAGTAAGATAGATA  
CAGACATGATCTTGATCTCATTTTAAAGATCAACTCAATACCCATCGATTAAACCAAAA  
TCAGCTCAATCGAATAAAAATTGACCCGAGTTATGGCAATTTGAAATCAGCGAGGAAAGT  
TTACGCCTACGGTTTTTAAGGAAGATTCTTCATCGCCGTAAATCGAAAAGTCGGCCGATA

AAGTGATGCTTATTGTGTTTTTTATTTTCGAGGTGTCATTTATCAACATTTTGTACCAT  
CAAACACAACAGTTGACAGTGCGTATTATTGCAAAGTACTAAAGGAGTTGAGAATGCACA  
TTTCCCGGAAACGGTCGGACTTGAAACCTTCGTGGATATTCCATCAAGACAATGCGCGGC  
CTCACACATCGAGCTTAACACGTGAATTTATGAGTAAAAATGGAGTTGAAACAATCCCTC  
ATCCCCCTTACAGCCCTGACTTGGCTCCATGTGATTTTTGGATGTTTCCTACGCTTAAAA  
AGGAGCTTCGCGGACGAAGATTCGTATCGAAGACAAAAATCCAGAATGCAATTCAAACCT  
TCTTCAACTCCATCCCAGAGGAAGAATTCAGGAAAACAATGTTGGATAAGTGGCAAGAGC  
GCATGAAAAAGTGCATCCGGTTTGATGGACGGTACTTTGAAAAGCGAAAGGAAGTTATGG  
AAGATTCGGAGGAAAGTGGATACGAATATTAACTTTTTGAATCCTGGTAAGCGAAAAATC  
TTCCTAAAAACCGTAGGGGTAACTTTCCTCACTAATTTCAAATTGTCATGACTCGGTCA  
ATTTTTATTGATTGAGCTGATCTTGGGTTTAATCGATAGGTATTGAGTTGATCTTTAAA  
ATGAGACCAAAATCATGTCTGTATCTATCTTACTTTTGAAGTTACAGAACCAGTCCCGGT  
ACTTTTGGGACACCCTACGTA

>Btmar2.9.16\_gi-1092450672-gb-MAMS01002091\_1:-4597490-4598469

gi-1092450672-gb-MAMS01002091.1:-4597490-4598469 Bemisia tabaci isolate MEAM1 Scaffold1685,  
whole genome shotgun sequence 980 bp

TACATAAGGTGTCCCAAAGCACCGGGACTTGTTCTGTAACCTCGAAAGTAAGATAGATA  
CAGACATGATTTTGATTTCAATTTAAAGATCAACTCAATACCTATCGATTAAAACCAAGA  
TCAGCTCAATCAAATAAAAATTGACCAAGTTATGGCAATTTGAAATCAGCGAGGAAAGTT  
TACGCCTACGGTTTTTAAGGAAGATTCTTCATCGCCGTAAATCGAAAAGTCGGCCTATAA  
AGTGATGCTTATTGTGTTTTTTTCAATTTTCGAGGTGTCATTTATCAACATTTTGTACCAC  
CAAACATAACAGTTGACAGTGCGTATTATTGCAAAGTGCTAAAGGAGTCGAGAATGCACA  
TTTCCCGGAAACGGTCGGACTTGAAAGCTTCGTGGATACTCCATCAAGACAAGCGCGGCC  
TCACACATCGAGCTTAAACGTGAATTTATGAGTAAAAATGGAGTTGAAACAATCCCTCA  
TCCCCCTTACAGCCCTGACTTGGCTCCATGTGATTTTTGGATGTTTCCTACGCTTAAAAA  
GGAGCTTCGCGGACGAAGATTCGAATCGAAGACCGAAATCCAGAATGCAATTCAAACCTT  
TTTCAACGCCATCCCAGAGGAAGAATTCAGGAAAACAATGTTGGATAAGGGGCAAGAGCG  
CATGAAAAAGTGCATCCGGTTTTATGGACGGTACTTTGAAAAGCAAAAGGAAGTTATGGA  
AGATTGGAAGGAAAGTGGATACGAATGTAACTTTTTGAATCCTGGTAAGCGAACAATCA  
TCCTAAAAACCGTAGGGGTAACTTTCCTCACTAATTTCAAATTGTCATAACTCGGTCAA



TTTTATCCGATTGAGCTGATCTTGGTTTTAATCGATAGGTATTGAGTTGATCTTTAAAA  
TGAGACCAAAATCATGTCTGTATCTATCTTACTTTTGAAGTTACAGAACCAGTCCCGGTA  
CTTTGGGACACCCTACGTA

--

>Btmar2.9.17\_gi-1092450672-gb-MAMS01002091\_1-:2353825-2354625  
gi-1092450672-gb-MAMS01002091.1-:2353825-2354625 Bemisia tabaci isolate MEAM1 Scaffold1685,  
whole genome shotgun sequence 801 bp

TTTACGCCTACGGTTTTTAAGGAAGATTCTTCATCGCCGTAAATCGAAAAGTCGGCCGAT  
AAAGTGATGCTTATTGTGTTTTTTATTTTCGAGGTGTCATTTATCAACATTTGTACCA  
TCAAACACAACAGTTGACAGTGCGTATTATTGCAAAGTACTAAAGGAGTGGAGAATGCAC  
ATTTCCCGGAAACGGTCGGACTTGAAAGCTTCGTGAATACTCCATCAAGACAATGCGCGG  
CCTCACACATCGAGCTTAACACGTGAATTTATGAGTAAAAATGGAGTTGAAACAATCCCT  
CATCCCCCTTACAGCGCTGACTTGGCTCCATGTGATTTTTGGATGTTTCCACGCGTAAA  
AAGGAGCTTCGCGGACGAAGATTCGTATCGAAGACCGAAATCCAGAATGCAATTCAAAAC  
TTCTTCAACTCCATCCCAGAGGAAGAATTCAGGAAAACAATGTTGGATAAGTGGCAAGAG  
CGCATGAAAAAGTGCATCCGGTTTGATGGACGGTACTTTGTAAAGCAAAAGGAAGTTATG  
GAAGATTCGGAGGAAAGTGGATAGGAATATTAACCTTTTGAATCCTGGTAAGCGAAAAAT  
CTTCCTAAAAACCGTAGGGGTAACTTTCTTCACTAATTTCAAATTGTCATAACTCGGTC  
AATTTTTATTGATTGAGCTGATCTTGGTTTTAATCGATAGGTTTGAGTTGATCTTTAAA  
ATGAGACCAAAAGCATGTCTGTATCTATCTTACTTTTGAAGTTACAGAACCAGTCCCGGT  
ACTTTTGGGACACCCTACGTA

--

>Btmar2.9.18\_gi-1092453380-gb-MAMS01000828\_1-:1700553-1701532  
gi-1092453380-gb-MAMS01000828.1-:1700553-1701532 Bemisia tabaci isolate MEAM1 Scaffold1195,  
whole genome shotgun sequence 980 bp

TACGTAAGGTGTCCCAAAGCACCGGGACTTGTTCTGTAACCTCGAAAGTAAGATAGATA  
CAGACATGATCTTGATCTCATTTTAAAGATCAACTCAATACCCATCGATTTAAACCAAGA  
TCAGCTCAATCGGATAAAAATTGACCGAGTTATGGCAATTTGAAATCAGCGAGGAAAAGTT  
TACGCCTACGGTTTTTAAGGAAGATTCTTCATCGCCGTAAATCGAAAAGTCGGCCGATAA  
AGTGATGCTTATTGTGTTTTTTATTTTCGAGGTGTCATTTATCAACATTTGTACCATC

AAACACAACAGTTGACAGTGCGTATTATTGCAAAGTACTAAAGGAGTTGAGAATGCACAT  
TTCCCGGAAACGGTCGGACTTGAAAGCTTCGTGGATACTCCATCAAGACAATGCGCGGCC  
TCACACATCGAGCTTAACACGTGAATTTATGAGTAAAAATGGAGTTGAAACAATCCCTCA  
TCCCCCTTATAGCCCTGACTTGGCTCCATGTGATTTTTGGATGTTCCACGCTAAAAAA  
GGAGCTTCGCGGACGAAGATTCGTATCGAAGACCGAAATCCAGAATGCAATTCAAACCTT  
CTTCAACTCCATCCCAGAGGAAGAATTCAGGAAAACAATGTTGGATAAGTGGCAAGAGCG  
CATGAAAAAGTGCATCCGGTTTGATGGACGGTACTTTGAAAAGCAAAAGGAAGTTATGGA  
AGATTTCGGAGGAAAGTGGATACGAATATTAACCTTTTTGAATGCTGGTAAGCGAAAAATCT  
TCCTAAAAACCGTAGGGGTAACTTTCCTCACTAATTTCAAATTGTCATAGCTCGGTCAA  
TTTTTATTTCGATTGAGTTGATCTTGGTTTTAATCGATAGGTATTGAGTTGATCTTTAAAA  
TGAGACCAAAATCATGTCTGTATCTATCTTACTTTTGAAGTTACAGAACCAGTCCCGGTA  
CTTTTGGGACACCCTACGTA

--

>Btmar2.9.19\_gi-1092454318-gb-MAMS01000400\_1:-875286-876263  
gi-1092454318-gb-MAMS01000400.1:-875286-876263 Bemisia tabaci isolate MEAM1 Scaffold1056,  
whole genome shotgun sequence 978 bp

TACAAAAGGTGTCCCAAAAGCACCGGGACTTGTTCTGTAACCTCGAAAGTAAGATGGATA  
CAGACATGATCTTGATCTCATTTTAAAGATCAACTCAATACCTATCGATTAAAACCAAGA  
TCAGCTCAATCGAATAAAAATTGACCAAGTTATGGCAATTTGAAATCAGCGAGGAAAGTT  
TACGCCTACGGTTTTTAAGGAAGATTCTTCATCGCCGTAAATCGAAAAGTCGGCCTATAA  
AGTGATGCTTATTGTGTTTTTTTCATTTTCGAGGTGTCATTTATCAACATTTTGTACCAC  
CAAACACAACAGTTGACAGTGCGTATTATTGCAAAGTGCTAAAGGAGTTGAGAATGCACA  
TTTCCCGGAAACGGTCGGACTTGAAAGCTTCGTGGATACTCCATCAAGACAAGCGCGGCC  
TCACACATCGAGCTTAACACGTGAATTTATGAGTAAAAATGGAGTTGAAACAATCCCTCA  
TCCCCCTTACAGCCCTGACTTGGCTCCATGTGATTTTTGGATGTTTCCTACACTTAAAAA  
GGAGCTTCGTGGACGAAGATTCGAATCGAAGACCGAAATCCAGAATGCAATTCAAACCTT  
TTTCAACGCCATCCCGGAGGAAGAATTCAGGAAAACAATGTTGGATAAGTGGCAAGAGCG  
CATGAAAAAGTGCATCCGGTTTGATGGACGGTACTTTGAAAAGCAAAAGGAAGTTATGGA  
AGATTTCGGAGGAAAGTGGATACGAATATTAACCTTTTTGAATCCTGGTAAGCGAAAAATCT  
TCCTAAAAACCGTAGGGGTAACTTTCCTCACTAATTTCAAATTGTCATAACTCAGTCAA

TTTTTATTCGATTGAGCTGATCTTGGTTTTAATCGATAGGTATTGAGTTGATCTTCAAAA  
TGAGACCAAAATCATGTCTGTATCTATCTTACTTTTGAAGTTACAGAACCAGTCCCGGTA  
CTTTTGGGACACCCTACG

--

>Btmar2.9.20\_gi-1092454872-gb-MAMS01000195\_1-:355950-356929  
gi-1092454872-gb-MAMS01000195.1-:355950-356929 Bemisia tabaci isolate MEAM1 Scaffold613, whole  
genome shotgun sequence 980 bp

TACATAAGGTGTCCCAAAGCACCGGGACTTGTTCTGTAAGTTCGAAAGTAAGATAGATA  
CAGACATGATCTTGATCTTATTTTAAAGATCAACTCAATACTCATCGATTAAAACCAAGA  
TCAGCTCAATCGGATAAAAATTGACCGAGTTATGGCAATTTGAAATCAGCGAGGAAAAGTT  
TACGCCTACGGTTTTAAGGAAGATTCTTCATCGCCGTAAATCGAAAAGTCGGCCGATAAA  
GTGATGCTTATTAGAGTTTTTTTATTTTCGAGGTGTCATTCATCAACATTTGTACCATC  
AAACACAACAGTTGACAGTGCGTATTATTGCAAAGTACTAAAGGAGTTGAGAATGCACAT  
TTCCCGGAAACGGTCGGACTTGAAAGCTTCGTGGATACTCCATCAAGACAATGCGCGGCC  
TCACACATCGAGCTTAACACGTGAATTTATAAGTAAAAATGGAGTTGAAACAATCCCTCA  
TCCCCCTTATAGCCCTGACTTGGCTCCATGTGATTTTTGGATGTTTCCTACGCTTAAAAA  
GGAGCTTCGCGGACGAAGATTCGTATCGAAGACCGAAATCCAGAATGCAATTCAAAACCT  
CTTCAACTCCATCCCAGAGGAAGAATTCAGGAAAACAATGTTGGATAAGTGGAAGAGCG  
CATGAAAAAGTGCATCCGGTTTGATGGACGGTACTTTGAAAAGCAAAAGGAAGTTATGGA  
AGATTTCGGAGGAAAGTGGATACGAATATTAACCTTTTGAATCCTGGTAAGCGAAAAATCT  
TCCTAAAAACCGTAGGCGTAACTTTCCTCACTAATTTCAAATTGTCATAACTCGGTCAA  
TTTTTATCCGATTGAGCTGATCTTGGTTTTAATCGATAGGCATTGAGTTGATCTTTAAAA  
TGAGACCAAAATCATGTCTGTATCTATCTTACTTTTGAAGTTACAGAACCGGTCCCGGTA  
CTTTTGGGACACCCGACGTA

>Btmar2.9.21\_gi-1092454872-gb-MAMS01000195\_1-:718785-719764  
gi-1092454872-gb-MAMS01000195.1-:718785-719764 Bemisia tabaci isolate MEAM1 Scaffold613, whole  
genome shotgun sequence 980 bp

TACATAAAGTGTCCCAAAGCACCGGGACTTGTTCTGTAAGTTCGAAAGTAAGATAGATA  
CAGACATGATCTTGATCTCATTTTAAAGATCAACTCAATACCTATCGATTAAAACCAAGA

TCAGCTCAATCGGATAAAAATTGACCGAGTTATGGCAATTTGAAATCAGCGAGGAAAAGTT  
TACGCCTACAGTTTTTAAGGAAGATTCTTCATCGCCGTAAATCGAAAAGTCGGCCCATAA  
AGTGATGCTTATTGTGTTTTTTATTTTCGAGGTGTCATTTATCAACATTTTGTACCATC  
AAACACAACAGTTGACAGTGCGTATTATTGCAAAGTGCTAAAGGAGTTGAGAATGCACAT  
TTCCCGTAAACGGTCAGACTTGAAAGCTTCGTGGATACTCCATCAAGACAATGCGCGGCC  
TCACACATCGAGCTTAAACGTGAATTTATGAGTAAAAATGGAGTTGAAACAATCCCTCA  
TCCCCCTTATAGCCCTGACTTGGCTCCATGTGATTTTTGGATGTTTCCTACGCTTAAAAA  
GGAGCTTAGCGGACGAAGATTGGAATCGAAGACCGAAATCCAGAATACAATTCAAAACCT  
CTTCAACTCCATCCAAGAGGAAGAATTCAGGAAAACAATGTTGGATAAGTGGCAAGAACG  
CATGGAAAAGTGCATCCGGTTTGATGGACGGTACTTTGAAAAGCAAAAGGAAGTTATGGA  
AGATTCGGAGGAAAGTGGATACGAATATTAACCTTTTTGAATCCTGGTAAGCGAAAAATCT  
TCCTAAAAACCGTAGGGGTAACTTTCCTCACTAATTTCAAATTGTCATGACTCGGTCAA  
TTTTTATTCGATTGAGCTGATCTTGGTTTTAATCGATAGGTATTGAGTTGATCTTTAAAA  
TGAGACCAAAATCATGTCTGCATCTATCTTACTTTTGAAGTTACAGAACCAGTCCCGGTA  
CTTTTGGGACACCCTACGTA

--

>Btmar2.9.22\_gi-1092427970-gb-MAMS01017568\_1-:2385592-2386573  
gi-1092427970-gb-MAMS01017568.1-:2385592-2386573 Bemisia tabaci isolate MEAM1 Scaffold835,  
whole genome shotgun sequence 982 bp

TACGTAAGGTGTCCCAAAGCACCGGGACTTGTTCTGTAACCTCGAAAGTAAGATAGATA  
CAGACATGATCTTGATTTTCAATTTAAAGATCAACTCATAATACCTATCGATTAAAACCAA  
GATCAGCTCAATCAGATAAAAATTGACAGAGTTATGACAATTTGAAATCAGCGAGGAAAAG  
TTTACGCCTACGGTTTTTAAGGAAGATTCTTCATCGCCGTAAATCGAAAAGTCGGCCGAT  
AAAGTGATACTTATCGTGTTTTTTATTTTCGAGGTGTCATTTATCAACATTTTGTACCA  
TCAAACACAACAGTTGACAGTGCGTATTATTGCAAAGTACTAAAGAAGTTGAGAATGCAC  
ATTTCCCGGAAACGGTCGGACTTGAAAGCTTCGTGGATACTCCATCAAGACAATGCGCGG  
CCTCACACATCGAGCTTAACACGTGAATTTATGAGTAAAAATGGAGTTGAAACAATCCCT  
CATCCCCCTTGTAGCCCTGACTTGGCTCCATGTGATTTTTGGATGTTTCCTACGCTTAAA  
AAGGAGCTTCGCGGACGAAGATTGATATCGAAGACCGAAATCCAGAATGCAATTCAAAAC  
TTCTTCAACTCCATCCCAGAGGAAGAATTCAGGAAAACAATGTTGGATAAGTGGCAAGAG

CGTATGAAAAAGTGCATCCGGTTTGATGGACGGTACTTTGAAAAGCAAAAGGAAGTTATA  
GAAGATTTCGGAGGAAAGTGGATACGAATATTAACCTTTTGAATCCTGGTAAGCGAAAAAT  
CTTCCTAAAAACCGCAGGGGTAACTTTCCTCACTAATTTCAAATTGTCATAACTCGGTC  
AATTTTTATTTCGATTGAGCTGATCTTGGTTTTAATCGATAGGTATTGCGTTGATCTTTAA  
AATGAGACCAAAATCATGTCTGTATCTATCTTACTTTTGAAGTTACAGAACCAGTCCCGG  
TACTTTTGGGACACCCTACGTA

>Btmar2.9.23\_gi-1092455272-gb-MAMS01000090\_1-:2198646-2199541  
gi-1092455272-gb-MAMS01000090.1-:2198646-2199541 Bemisia tabaci isolate MEAM1 Scaffold300,  
whole genome shotgun sequence 896 bp

TACATAAGGTGTCCCAAGAGCACCGGGACTTGTTCTGTAACCTTCGAAAGTAAGATAGATA  
CAGACATGATCTTGATTTTCAATTTAAAGATCAACTCAATACCTATCGATTAATCAAGA  
TCAGCTCAATCGAATAAAAATTGACCGAGTTATGGCAATTTGAAATCAGCGAGGAAAAGTT  
TACGCCTACGGTTTTTAAGGAAGATTCTTCATCGCCGTAAATCGAAAAGTTGGCCGATAA  
AGTGATGCTTATTGTGTTTTTTATTTTCGAGGTGTCATTTATCAACATTTGTACCATC  
AAACACAACAGTTGACAGTGCGTATTATTGCAAAGTACTAAAGGAGTTGAGAATGCACAT  
TTCCCGGAAACGGTCGGACTTGAAAGCTTCGTGGATACTCCATCAAGACAATGCGCGGCC  
TCACACATCGAGCTTAACACGTGAATTTATGAGTAAAAATGGAGTTGAAACAATCCCTCA  
TCCCCCTTATAGCCCTGACTTGGCTCCATGTGATTTTTGGATGTTTCCTACGCTTAAAAA  
GGAGCTTCGCGGACGAAGATTCGTATCGAAGACCGAAATCCAGAATGCAATTCAAACTT  
CTTCAACTCCATCTCAGAGGAAGAATTCAGGAAAACAATGTTGGATAAGTGGCAAGAGCG  
CATGAAAAAGTGCATCCGGTTTGATGGACGGTACTTTGAAAAGCAAAAGGAAGTTATGGA  
AGATTTCGGAGGAAAGTGGATACGAATATTAACCTTTTGAATGCTGGTAAGCGAAAAATCT  
TCCTAAAAACCGTAGAGGTAACTTTCCTCACTAATTTCAAATTGTCATAACTCGGTCAA  
TTTTTATTTCGATTGAGCTGATCTTGGTTTTAATCGATAGGTATTGAGTTGATCTTT

--

>Btmar2.9.24\_gi-1092455411-gb-MAMS01000045\_1-:489310-490287  
gi-1092455411-gb-MAMS01000045.1-:489310-490287 Bemisia tabaci isolate MEAM1 Scaffold199, whole  
genome shotgun sequence 978 bp

TACATAGGGTGTCCCAAAAGTACCGGGACTGGTTCTGTAACCTTCGAAATTAAGATAGATA

CAGACATGATCTTGGTTTCATTTTAAAGATCAACTCAATACCTATCGATTAAAACCAAGA  
TCAGCTCAATCGGATAAAAAATTGACCGAGTTATGACAATTTGAAATCAGTGAGGAAAAGTT  
TACCCCTACGGTTTTTAAGGAAGATTCTTCATCGCCGTAAATCGAAAATCGGCCTGTAAA  
GTGATGCTTATTGTGTTTTTTGATTTTCGAGGTGTCAATTATCAACATTTTGTACCACCA  
AACACAACAGTTGACAGTGCGTCTTATTTCAAAGTGCTAAAGGAGTTGAGAATGCACATC  
TCCCGGAAACGGCCGACTTGAAAGCTTCGTGGATACTCCATAAAGACAATGCGCGGCCT  
CACACATCGAACTTAACACGTGAATTTATGAGTAAAAATGGAGTTGAAACAATTCCTCAT  
CCCTCTTATAGCCCTGACTTGGCTCCATGTGATTTTTGGATGTTTCCTACGCCTAAAAAG  
AAGCTTCGCGGACGAAGATTCGAATCGAAGACCGAAATCCAGAATGCAGTTCAGAACTTT  
TTCAACGCCATCCCAGAGGAAGAATTCAGGAAAACAATGTTGGATAAGTGGCATGAGCGC  
ATGAAAAAGTGCATCCGGTTTGATGGACGGTACTTTGAAAAGCAAAAGGAAGTTATGGAA  
GATTTGGAGGAAAGCGGATACGAATATTAACTTTTTGAATCCTGGTAAGCGAAAAATCTT  
CCTAAAAGACCGTAGGGGTAACCTTTCCTACCGATTTAAAATTGCCATAACTCGGTCAA  
TTATTATCTGATTGAGCTTCTTGGTCTTAATCAATAGGTATTGAGTTGATCTTTAAATG  
AAACCAAGATCATGTCTGTATCTATCTTACTTTTGAAGTTACAGAACCAGTCCCGGTACT  
TTTGGGACACCCTATGTA

--

>Btmar2.9.25\_gi-1092455507-gb-MAMS01000028\_1-:1656546-1657527  
gi-1092455507-gb-MAMS01000028.1-:1656546-1657527 Bemisia tabaci isolate MEAM1 Scaffold161,  
whole genome shotgun sequence 982 bp

TACATAAGGTGTCCCAAAGCACCGGGATTTGTTCTGTAACCTCGAAAGTAAGATAGATA  
CAGACATGATCTTGATTTTCATTTAAAGATCAACTCAATACCTATCGATTAAAACCAAGA  
TCAGCTCAATCGGATAAAAAATTGACCGAGTTATGGCAATTTGAAATCAGCGAGGAAAAGTT  
TATACGCCTACGGTTTTTAAGAAGATTCTTCATCGCCGTAAATCGAAAAGTCGGCCGAT  
AAAGTGATGCTTATTGTGTTTTTTATTTTCGAGGTGTCATTTATCAACATTTTGTACCA  
TCAAACACAACAGTTGACAGTGCGTATTATTGCAAAGTACTAAAGGAGTTGAGAATGCAC  
ATTTCCCGGAAACGGTCGGACTTGAAAGCTTCGTGGATACTCCATCAAGACAATGCGCGG  
CCTCAAACATCGAGCTTAACACGTGAATTTATGAGTAAAAATGGAGTTGAAACAATCCCT  
CATCCCCCTTATAGCCCTGACTTGGCTCCATGTGATTTTTGGATGTTTCCTACGCTTAAA  
AAGGAGCTTCGCGGACGAAGATTCGTATCGAAGACAAAAATCCAGAATGCAATTCAAAAAC

TTCTTCAACTCCATCCCAGAGGAAGAATCCAGGAAAACAATGTTGGATAAGTGGCAAGAG  
CGCATGAAAAAGTGCATCCGGTTTGATGGACGGTACTTTGAAAAGCAAAAGGAAGTTATG  
GAAGATTCGGAGGAAAGTGGATACGAATATTAACCTTTTGAATCCTGGTAAGCGAAAAAT  
CTTCCTAAAAACCGTAGGGGTAACTTTCCTCACTAATTTCAAATTGTCATAACTCGGTC  
AATTTTTATTGATTGAGCTGATCTTGGTTTTAATCGATAGGTATTGAGTTGATCTTTAA  
AATGAAATCAAAATCATGTCTGTATCTTACTTTTGAAGTTACAGAACCAGTCCCGG  
TACTTTTGGGACACCCTACGTA

--

>Btmar2.9.26\_gi-1092429439-gb-MAMS01016099\_1-:2804413-2805392  
gi-1092429439-gb-MAMS01016099.1-:2804413-2805392 Bemisia tabaci isolate MEAM1 Scaffold767,  
whole genome shotgun sequence 980 bp

TACATAAGGTGTCCCAAAGCACCGGGACTTGTTCTGTAACCTCGAAAGTAAGATAGATA  
CAGACATGATCTTGATCTCATTTTAAAGATCAACTCAATACCCATCGATTAAAACCAAGA  
TCAGCTCAATCGGATAAAAATTGACCGAGTTACGGCAATTTGAAATCAGCGAGGAAAGTT  
TACGCCTACGGTTTTTAAGGAAGATTCTTCATCGCCATAAATCGAAAAGTCGGCCGATAA  
AGTGATGCTTATTGTGTTTTTTATTTTCGAGGTGTCATTTATCAACATTTTGTACCATC  
AAACACAACAGTTGACAGTGCGTATTATTGCAAAGCACTAAAGGAGTTGAGAATGCACAT  
TTCCCGGAAACGGTCGGACTTGAAAGCTTCGTGGATACTCCATCAAGACAATGCGCGGCC  
TCACACATCGAGCTTAACACGTGAATTTATGAGTAAAAATGGAGTTGAAACAATCCCTCA  
TCCCCCTTATAGCCCTGACTTGGCTCCATGTGATTTTTGGATGTTTCCTACGCTTAAAAA  
GGAGCTTCGCGGACGAGGATTCGTATCGAAGACCGAAATCCAGAATGCAATTCAAACCTT  
CTTCAACTCCATCCCAGAGGAAGAATTCAGGAAAACAATGTTGGATAAGTGGCAAGAGCG  
CATGAAAAAGTGCATCCGGTTTGATGGACGGTACTTTGAAAAGCAAAAGGAAGTTATGGA  
AGATTCGGAGGAAAGTGGATACGAATATTAACCTTTTGAATCCTGGTAAGCGAAAAATCT  
TCCTAAAAACCGTAGGGGTAACTTTCCTCACTAATTTCAAATTGCCAAAACCTCGGTCAA  
TTTTTATTGATTGAGCTGATCTTGGTTTTAATCGATAGGTATTGAGTTGATCTTTAAGA  
TGAAACCAAAATCATGTCTGCATCTTACTTTTGAAGTTACAGAACCAGTCCCGGTA  
CTTTTGGGACACCCTACGTA

--

>Btmar2.9.27\_gi-1092435969-gb-MAMS01009569\_1-:379428-380409

gi-1092435969-gb-MAMS01009569.1-:379428-380409 Bemisia tabaci isolate MEAM1 Scaffold479, whole genome shotgun sequence 982 bp

TACGTAAGGTGTCCCAAAGCACCGGGACTTGTTCTGTAACCTCGAAAGTAAGATAGATA  
CAGACATGATCTTGATTTTCAATTTAAAGATCAACTCAATACCTATCGATTAAAACCAAGA  
TCAGCTCAATCGGATAAAAATTGACCGATTGATGGCAATTTGAAATCAGCGAGGAAAAGTT  
TACGCCTACGGTTTTTAAGGAAGATTCTTCATCGCCGTAAATCGAAAAGTCGGCCGATAA  
AGTGAAGCTTATTGTGTTTTTTATTTTCGAGGTGTCATTTATCAACATTTTGTACCATC  
AAACACAACAGTTGACAGTGCTTATTATTGCAAAGTACTAAAGGAGTTGAGAATGCACAT  
TTCCCGGAAACGGTCGGACTTGAAAGCTTCGTGGATATTCCATCAAGACAATGCGCGGCC  
TCACACATCGAGCTTAACACGTGAATTTATGAGTAAAAATGGAGTTGAAACAATTCCTCA  
TCCCCCTTATAGCCCTGACTTGGCTCCATGTGATTTTTGGATGTTTCCTACGATTAAAAA  
GGAGCTTCGCGGACGAAGATTCGTATCGAAGATCGAAATCCAGAATGCAATTCAAATAC  
TTCTTCAACTCCATCCCAGAGGAAGAATTCAGGAAAACAACGTTGGATAAGTGGCAAGAG  
CGCATGAAAAAGTGCATCCGGTTTGATGGACGGTACTTTGAAAAGCAAAAGGAAGTTATG  
GAAGATTCGGAGGAAAGTGGATACGAATATTAACCTTTTTGAATGCTGGTAAGCGAAAAAT  
CTTCCTAAAAACCGTAGGAGTAACTTTCTCTACTAATTTCAAATTGTCATAACTCGGTC  
AATTTTTATTGATTGAGCTGATCTTGTTTTAATCGATAGGTATTGAGTTGATCTTTAA  
AATGAGACCAAAATCATGTCTGCATCTATCTTACTTTTGAAGTTACAGAACCAGTCCCGG  
TACTTTTGGGACACCCTACGTA

--

>Btmar2.9.28\_gi-1092444632-gb-MAMS01004733\_1-:190458-191437

gi-1092444632-gb-MAMS01004733.1-:190458-191437 Bemisia tabaci isolate MEAM1 Scaffold2737, whole genome shotgun sequence 980 bp

TACGTAAGGTGTCCCAAAGCACCGGGACTTGTTCTGTAACCTCAAAAGTAAGATAGATA  
CAGACATGATCTTGATCTCAATTTAAAGATCAACTCAATACCTATCGATTAAAACCAAGA  
TCAGCTCAATCGGATAAAAATCGACCGAGTTATGGCAATTTGAAATCAGCGAGGAAAAGTT  
TACGCCTACGGTTTTTAAGGAAAATTCTTCATCGCCGTAAATCGAAAAGTCGTCCGATAA  
AGTGATGCAAATTGTGTTTTTTATTTTCGAGGTGTCATTTATCAACATCTTGTACCATC



AAACACAACAGTTGACAGTGCGTATTATTGCAAAGTACTAAAGGAGTTGAGAATGCACAT  
TTCCCGGAAACGGTCGGACTTGAAAGCTTCGTGGATACTCCATCAAGACAATGCGCGGCC  
TCACACATCGAGCTTAACACGTGAATTTATGAGTAAAAATGGAGTTGAAACAATCCCTCA  
TCCCCCTTATAGCGCTGACTTGGCTCCATGTGATTTTCGGATGTTTCCTACGCTTAAAAA  
GGAGCTTCGCGGACGAAGATTCGTATCGAAGACCGAAATCCAGAATGCAATTCAAAACCT  
CTTCAACTCCATCCCAGAGGAAGAATTCAGGAAAACAATGTTGGAAAAGTGGCAAGAGCG  
CATGAAAAATTGCATCCGGTTTGATGGACGGTACTTTGAATAGCAAAAGGAAGTTATGGA  
AGATTCGGAGGAAAGTGGATACGAATATTAACCTTTTGAATCCTGGTAAGCGAAAAATCT  
TCCTAAAAACCGTAGGGGTAACTTTCCTCACTAATTTCAAATTGTCATGACTCGGTCAA  
TTTTTATTCGATTGAGCTGATCTTGGTTTTAATCGATAGGTATTGGGTTGATCTTTAAAA  
TGAGACCAAAACCATGTCCGTATCTATCTTACTTTTGATGTTACAGAACCAGTCCCGGTA  
CTTTTGGGACACCCTACGTA

>Btmar2.9.29\_gi-1092444632-gb-MAMS01004733\_1-:135854-136716

gi-1092444632-gb-MAMS01004733.1-:135854-136716 Bemisia tabaci isolate MEAM1 Scaffold2737,  
whole genome shotgun sequence 863 bp

TACATAAGGTGTCCCAAAGAACCGGGACTTGTTCTGTGACTTCGAAAGTAAGATAGATA  
CAGACATGATCTTGATCTCATTTTAAAAATCAACTCAATACCTATCGATTAAAACCAAGA  
TCAGCCAAATCGGAAAAAAATTGACCGAGGTATGGCAATTTGAAATCAGCGAGGAAAGTT  
TACGCCTACGGTTTTTAAGGAAGATTCTTTATCGCCGTAAATCGAAAAGTTGGCCGATAA  
AGTGATGCTTATTCTGTTTTTTATTTTCGAGGTGTCATTTATCAACATTTTGTACCATC  
AAACACAACAGTTGACAGTGCGTATTATTGCAAAGTACTAAAGGAGTTGAGAATGCACAT  
TTCCCGGAGACGGTCGGACTTGAAAGCTTCGTGGATACTCCATCAAGACAATGCGCGGCC  
TCACACATCGAGCTTAACGCGTGAATTTATGATTACAAAGGAGTTGAAACAATCCCTCAT  
CCCCCTTATAGCCCTGACTTGGCTCCACGTGATTTTGGATGTTTCCTACGCTTAAAAAG  
GAGCTTCGCGGACGAAGATTCGTATCGAAGACCGAAATCCAGAATGCAATTCAAAACCTC  
TTCAACTCCATCCCAGAGGAAGAATTCAGGGAAACAATGTTGGAAAAGTGGCAAGAGCGC  
ATGAAAAATTGCATCCGGTTTGATGGACGGTACTTTGAAAAGCAAAAGGAAGTTATGGAA  
GATTCGGAGGAAAGTCGATACGAATATTAACCTTTTGAATCCTGGTAAGCGAAAAATCTT  
CCTAAAAACCGTAGGGGTAACTTTCCTCACTAATTTCAAATTGTCATGACTCGGTCAAT  
TTTTATTCGATTGAGTTGATCTT

--

>Btmar2.9.30\_gi-1092447501-gb-MAMS01003488\_1-:1198611-1199587  
gi-1092447501-gb-MAMS01003488.1-:1198611-1199587 Bemisia tabaci isolate MEAM1 Scaffold2229,  
whole genome shotgun sequence 977 bp

TACATAAGGTGTCCCAAAGCACCGGGACTTGTTCTGTAACCTCGAAAGTAAGATAGATA  
CAGACATAATCTTGATCTCATTTTATAGATCAACTCAATACCTATCGATTAAAACCAAGA  
TCAGCTCAATCGAATAAAAATTGACCGAGTTATGGCAATTGAAATCAGCGAGTAAAGTT  
TACGCCTACGGTTTTTAAGGAAGATTCTTCATCGCCGTAAATCGAAAAGTCGGCCGATAA  
AGTGATGCTTATTGTGTTTTTTATTTTCGAGGTGTCATTTATCAACATTTTGTACCATC  
AAACACAACAGTTGACAGTGCGTATTATTGCAAAGTACTAAAGGAGTTGAGAATGCACAT  
TTCCCGGAAACGGTCGGACTTGAAAGCTTCGTGGATACTCCATCAAGACAATGCGCAGCC  
TCACACATCGAGCTTAACACGTGAATTTATGAGTAAAAATGGAGTTGAAACAATCCCTCA  
TCCCCCTAATAGCGCTGACTTGGCTCCATGTGATTTTTGGATGTTTCTCACGCTAAAAA  
GGAGCTTCGCGGACGAAGATTCGTATCGAAGACCGAAATCCAGAATGCAATTCAAAATT  
CTTCAACTCCATCCCAGAGGAAGAATTCAGGAAAACAATGTTGGATAAGTGGCAAGAGCG  
CATGAAAAAGTGATCCGGTTTGATGGACGGTACTTTGAGAAGCAAAAGGAAGTTATGGA  
AGATTCGGAGGAAAGTGGATACGAATATTAACTTTTTGAATCCTGGTAAGCGAAAAATCT  
TCCTAAAACCGTAGGGGTAACTTTCCTACTAATTTCAAATTGTCATAACTCGGTCAA  
TTTTTATTCGATTGAGCTGATCTTGGTTTTAATCGATAGGTATTGAGTTGATCTTTAAAA  
TGAGACCAAAATCATGTGTGCATCTATCTTACTTTTGAAGTTACAGAACCAGTCTCGGTA  
CTTTTGGGACACCCTAC

--

>Btmar2.9.31\_gi-1092452270-gb-MAMS01001295\_1-:535929-536907  
gi-1092452270-gb-MAMS01001295.1-:535929-536907 Bemisia tabaci isolate MEAM1 Scaffold1374,  
whole genome shotgun sequence 979 bp

TACATAAGGTGTCCCAAAGCACCGGGACTTGTTCTGTAACCTCGAAAGTAAGATAGATA  
CAGACATGACCTTGATTTTATTTTAAAGATCAACTCAATACCTATCGATTAAAACCAAGA  
TCAGCTCAATCGGATACAAATTGACCGAGTTATGGCAATTGAAATCAGCGAGGAAAGTT  
TACGCCTACGGTTTTTAAGGAAGATTCTTCATCGCCGTAAATCGAAAAGTCGGCCGATAA

AGTGATGCTTATTGTGTTTTTTATTTTCGAGGTGTCATTTATCAACATTTTGTACCATC  
AAACACAACAGTTGACAGTGCGTATTATTGCAAAGTACTAAAGGAGTTGAGAATGCACAT  
TTCCCGGAAACGGTCGGACTTGAAAGCTTCGTGGATACTCCATCAAGACAATGCGCGGCC  
TCACACATCGAGCTTAACACGTGAATTTATGAGTAAAAATGGAGTTGAAACAATCCCTCA  
TCCCCCTTATAGCCCTGACTTGGCTCCATGTGATTTTTGGATGTTTCCTGCGCTTAAAAA  
GGAGCTTTCGCGGACGAAGATTCGTATCGAAGACAAAAATCCAGAATGCAATTCAAACT  
TCTTCAACTCCATCCCAGAGGAAGAATTCAGGAAAACAATGTTGGATAAGTGGCAAGAGC  
GCATGAAAAAGTGCATCCGGTTTGATGGACGGTACTTTGAAAAGCAAAAGGAAGTTATGG  
AAGATTTGGAGGAAAGTGGATACGAATATTAACTTTTTGAATTCTGGTAAGCGAAAAATC  
TTCCTAAAAACCGTAGGGGTAACTTTCCTCACTAATTTCAAATTGTCATAACTCGGTCA  
ATTTTTATTGATTGAGCTGATCTTGGTTTTAATCGATAGGTATTGAGTTGATCTTTAAA  
ATGAGACCAAAATCATGTCTGCATCTTACTTTTGAAGTTACAGAACCAGTCCCGGTAC  
TTTTGGGACACCCTACGTA

>Btmar2.9.32\_gi-1092452270-gb-MAMS01001295\_1-:1440942-1441917

gi-1092452270-gb-MAMS01001295.1-:1440942-1441917 Bemisia tabaci isolate MEAM1 Scaffold1374,  
whole genome shotgun sequence 976 bp

TACATAGGGTGTCCCAAAAGTACCGGGACTGGTTCTGTAACCTTCGAAAGTAAGATAGATA  
CAGACATGATCTTGGTCTCATTTTTAGGATCAACTCAATACCTATCGATTAAGACCAAGA  
TCAGCTTAATCGAATAAAAATTGACCGAGTTATGGCCATTTGAAATCAGTGAGGAAAGTT  
TACCCCTACGGTTTTTAAGGAAGATTCTTCATCGCCGTAAATCGAAAAATCGGCCTGTAA  
AGTGATGCTTATTGTGTTTTTTGATTTTCGAGGTGTCATTTATCAACATTTTGTACCACC  
AAACAAAACAGTTGACAGTGCGTATTATTGCAAAGTGCTAAAAGAGTTGAGAACGCACAT  
CTCCCGGAAACGGCCGGACTTGAAAGCTTCGTGGATACTCCATCAAGACAATGCGCGGCC  
GCACACATCGAACTTAACACGTGACTTTATAAGTAAAAATGGAGTTGAAACAATCCCGCA  
CCCCCTAATAGCCCCGACTTGGCTCCATGTGATTTTTGGATGTTTCCTACGCTTAAAAA  
GGAGCTTCGCGGACGAAGATTCGAATCGAAGACCGAAATCCAGATTGCAGTTCAGAACTT  
TTTCAACGCCATTCCAGAGGAAAAATGCAGGAAAACAATGTTGAATAGGTGGCAAGAGCG  
CATAAAAAAGTGCATCCGGTTTGATGGACGGTACTTTGAAAAGCAAAAGGAAGTTATGGA  
AGATTTCGAGGAAAGCGGATACGAATATTAACTTTTTGAATCCTGGTAAGCGAAAAATCT  
TCCTAAAAAACCGTGGGGGTAACTTTCCTCACTGATTTCAAATTGCCATAATTCGGTTA

ATTTTAATTCGATTGAGCTGACCTGGTTTTAATCGATAGGTATTAAGTTGATCTTTCAA  
ATGAAACCAAGATCATGCCTGTATCTATCTTACTTTCGAAGTTACAGAACCAGTCCCGGT  
ACTTTTGGGATACCTT

--

>Btmar2.9.33\_gi-1092454460-gb-MAMS01000340\_1-:2114912-2115891  
gi-1092454460-gb-MAMS01000340.1-:2114912-2115891 Bemisia tabaci isolate MEAM1 Scaffold1034,  
whole genome shotgun sequence 980 bp

TACATAAGGTGTCCCAAAGCACCGGGACTTGTTCTGTAACCTCGAAAGTAAGATAGATA  
CAGACATGATCTTGATTTTCAATTTAAAGATCAACTTAATACCTATCGATTAAAACCAAGA  
TCAGCTCAATCGGATAAAAATTGACCGAGTTATGACAATTTGAAATCAGCGAGGAAAAGTT  
TACGCCTACGGTTTTTCAGGAAGATTCTTCATCGCCGTAAATCGAAAAGTCGGCCGATAA  
AGTGATGCTTATTGTGTTTTTTATTTTCGAGGTGTCATTTATCAACATTTTGTACCATC  
AAACACAACAGTTGACAGTGCGTATTATTGCAAAGTACTAAAGGAGTTGAGAATGCACAT  
TTCCCGGAAACGGTCGGACTTGAAAGCTTCGTGGATACTCCATCAAGACAATGCGCGGCC  
TCACACATCGAGCTTAACACGTGAATTTATAAGTAAAAATGGAGTTGAAACAATCCCTCA  
TCCCCCTTATAGCCCTGACTTGGCTCCATGTGATTTTTGGATGTTTCCTCCGCTTAAAAA  
GGAGCTTCGCGGACGAAGATTCGTATCGAAGACCGAAATCCAGAATGCAATTCAAACCTT  
CTTCAACTCCATCCCAGAGGAAGAATTCAGGAAAACAATGTTGGATAAGTGGCAAGAGCG  
CATGAAAAAGTGCATCCGGTTTGATGGACGGTACTTTGAAAAGCGAAAGGAAGTTATGGA  
AGATTCCGAGGAAAGTGGATAGGAATTAACCTTTTTGAATCCTGGTAAGCGAAAAATCT  
TCCTAAAAACCGTAGGGGTAACTTTCTCACTAATTTCAAATTGTCATAACTCGGTCAA  
TTTTTATTCGATTGAGCTGATCTTGGTTTTAATCGATAGGTATTGAGTTGATCTTTAAAA  
TGAGACCAAAATCATGTCTGCATCTATCTTACTTTTGAAGTTACAGAACCAGTCCCGGTA  
CTTTTGGGACACCCTACGTA

--

>Btmar2.9.34\_gi-1092454901-gb-MAMS01000188\_1-:535505-536485  
gi-1092454901-gb-MAMS01000188.1-:535505-536485 Bemisia tabaci isolate MEAM1 Scaffold596, whole  
genome shotgun sequence 981 bp

TACATAAGGTGTCCCAAAGCACCGGGACTTGTTCTGTAACCTCGAAAGTAAGATAGATA  
CAGACATGATCTTGATTTTCAATTTAAAGATCAACTCAATACCTATCGATTAAAACCAAGA

TCAGCTCAATCGGATAAAAATTGACCGAGTTATGGCAATTTGAAATCAGCGAGGAAAAGTT  
TACGCCTACGGTTTTTAAGGAAGATTCTTCATCGCCGTAAATCGAAAAGTCGGCCTATAA  
AGTGATGCTTATTGTGTTTTTTCATTTTCGAGGGGTCATTTATCAACATTTTGTACCAC  
CAAACACAACAGTTGACAGTGCGTATTATTGCAAAGTGCTAAAGGAGTTGAGAATGCACA  
TTCCCGGAAACGGTCGGATTTGAAAGCTTCGTGGATACTCCATCAAGACAAGCGCGGCC  
TCACACATCGAGCTTAACACGAGAATTTATGAGTAAAAATGGAGTTGAAACAATCCCTCA  
TCCCCCTTACAGCCCTGACTTGGCTTGATGTGATTTTTGGATGTTTCCTACACTTAAAAA  
GGAGCTTCGTGGACGAAGATTGGAATCGAAGACCGAAATCCAGAATGCAATTCAAAACCT  
TTTCAACGCCATCCCAGAGGAAGAATTCAGGAAAACAATGTTGGATAAGTGGCAAGAGCG  
CATGAAAAAGTGATCCGGTTTGATGGACGGTACTTTGAAAAGCAAAAGGAAGTTATGGA  
AGATTCGGAGGAAAGTGGATACGAATATTAACCTTTTTAAATCCTGGTAAGCGAAAAATCT  
TCTTTAAACCGTAGGGGTAACTTTCTCTACTAATTTCAAATTGTCATAACACCGGTCA  
ATTTTTATCCGATTGAGCTGATCTTGGTTTTAATCGATAGGTATTGAGTTGATCTTTAA  
ATGAGACCAAAATCATGTCTGTATCTATCTTACTTTGAAGTTACAGAACCAGTCCCGGT  
ACTTTTGGGACACCCTACGTA

>Btmar2.9.35\_gi-1092454901-gb-MAMS01000188\_1-:673732-674712

gi-1092454901-gb-MAMS01000188.1-:673732-674712 Bemisia tabaci isolate MEAM1 Scaffold596, whole  
genome shotgun sequence 981 bp

TACATAGGGTGTCCCAAAGTACTGGGACTGGTTCTGTAACCTTCGAAAGTAAGATAGATA  
CAGACATGACCTTGATCTCATTTTAAAGATCAACTCAATACCTATTCATTTAAACCAAGA  
TCAGCTCAATCGAATAAAAATTGACCGAGTTATGGCAATTTGAAATCAGTGAGGAAAAGTT  
TACCCCTACGGTTTTTAAGGAAGATTCTTCATCGCCGTAAATCGAAAATCGGCCTGTAA  
AGTGATGCTTATTGTGTTTTTTATTTTCGAGGTTTCATTTTCAACATTTTGTACCACC  
AAACACAACAGTTGACAGTGCGCATTATTGCAAAGTGCTAAAGGAGTTGAGAATGCACAT  
CTCCCGGAAACGGCCGGACTTGAAACCTTCGTGGATACTCCATCAAGACAATGCGCGGCC  
TCACACATCGAACTTAACACGTGAATTTATGAGTAAAAATGGAGTTTGAACAATCCCTCA  
TCCCCCTTATAGCCCTGACTTGGCTCCATGTGATTTTTGGATGTTTCCTACGCTTAAAAA  
GGAGCTTCGCGGATGAAGATTCCAATCGAAGACCGAAATCCAGAATGCAGTTCAGAAGCTT  
TTTCAACGTCATCCCAGAGGAAGAATTCAGGAAAACAATGTTGGATAAGTGGCAAGAGCG  
CATGAAAAAGTGATCCGGTTTGATGGACGGTACTTTGAAAAGCAAAAGGAAGTTATGGA

AGAGTCGGAGGAAAGCGGATACGAATATTGACTTTTTGAATCCTGGTAAGCGAAAAATCT  
TCCTAAAAAACCATAGGGGTAACTTTCCTCACTGATTTCAAATTGCCATAACTTGGTCA  
ATTTTATCCGATTAAGCTGATCTTGGTCTTAATCGATAGGTATTGAGTTGATCTTCAA  
ATGAAACCAAGATCATGTCTGCATCTATCTAACTTTCGAAGTTACAGAACCAGTCTCGGT  
ACTTTGGGACACCATATGTA

--

>Btmar2.9.36\_gi-1092454946-gb-MAMS01000174\_1-:612776-613753  
gi-1092454946-gb-MAMS01000174.1-:612776-613753 Bemisia tabaci isolate MEAM1 Scaffold562, whole  
genome shotgun sequence 978 bp

TACATAAGGTGTCCCAAAGCACCGGGACTTGTTCTGTAACCTCGAAAGTAAGATAGATA  
CAGACATGATCTTGATCTCATTTTAAAGATCAACTCATACCTATTGATTAAACCAACAT  
CAGCTCAATCGGATAAAAAATTGACCGAGTTATGGCAATTTGAAATCAGCGAGGAAAGTTT  
ACGCCTACGGTTTTTAGGAAGATTCTTCATCGCCGTAAATCGAAAAGTCGGCCGATAAAG  
TGATGCTTATTGTGTTTTTTATTTTCGAAGTGTCATTTATCAACATTTTGTACCATCAA  
ACACAACAGTTGACAGTGCGTATTATTGCAAAGTACTAAAGGAGTTGAGAATGCACATTT  
CCCGGAAACGGTCGGACTTGAAAGCTTCGTGGATACTCCATCAAGACAATGCGCGGCCTC  
ACACATCGAGCTTAACACGTGAATTTATGAGTGAAAATGGAGTTGAAACAATCCCTCATC  
CCCCTTATAGCCCTGACTTGGCTCCATGTGATTTTTGGACGTTTCCTACGCTTAAAAAGG  
AGCTTCGCGGACGAAGATTCGTATCAAAGACCGAAATCCAGAATGCAATTCAAAACCTCT  
TCAACTCCATCCCAGAGGAAGAATTCAGGAAAACAATGTTGGATAAGTGGCAAGAGCGCA  
TGAAAAAGTGCATCCGGTTTGATGGACGTTACTTTGAAAAGCAAAAGGAAGTTATGGAAG  
ATTCGGAGGAAAGTGGATACGAATATTAACTTTTGAATCCTGGTAAGCAAAAAATCTTC  
CTAAAAACCGTAGGGGTAACTTTCCTCACTAATTTCAAATTGTCATAACTCGGTCAATT  
TTTATTCAATTAAGCTGATCTTGGTTTTAATCGATAGGTATTGAGTTGATCTTTAAATG  
AGACCAAAATCATGTCTGTATCTATCTTACTTTTGAAGTTACAGAACCAGTCCCGGTACT  
TTTGGGACACCCTACGTA

--

>Btmar2.9.37\_gi-1092455625-gb-MAMS01000011\_1-:2442087-2443066  
gi-1092455625-gb-MAMS01000011.1-:2442087-2443066 Bemisia tabaci isolate MEAM1 Scaffold123,  
whole genome shotgun sequence 980 bp

TACGTAAGGTGTCCCAAAGCACCGGGACTTGTTCTGTAACCTTGAAAGTAAGATGGATA  
CAGACATGATCTTGATCTCATTTTAAAGATCAACTCAATACCTATCTATTTAAACCAAGA  
TCAGCTCAATCGGATAAAAATTGACCGAGTTATGGCAATTTGAAATCAGCGAGGAAAAGTT  
TACGCCTACGGTTTTTAAGGAAGATTCTTCATCGCCGTAAATCGAAAAGTCGGCCGATAA  
AGTGATGCTTCTTGTTTTTTTATTTTCGAGGTGTCATTTATCAACATTTTGTACCATC  
AAACACAACAGTTGACAGTGCGTATTATTGCAAAGTACCAAAGGAGTTGAGAATGCACAT  
TTCCCGGAAACGGTCGGACTTGAAAGCTTCGTGGATACTCCATCAAGACAATGCGCGGCC  
TCACACATCGAGCTTAACACGTGAATTTATGAGTAAAAATGGAGTTGAAACAATCCCTCA  
TCCCCCTAATAGCGCTGACTTGGCTCCATGTGATTTTTGGATGTTTCCACGCTTAAAAA  
GGAGCTTCGCGGACGAAGATTCGTATCGAAGACCGAAATCCAGAATGCAATTCAAAACCTT  
CTTCAACTCCATCCCAGAGGAAGAATTCAGGAAAACAATGTTGGATAAGTGGCAAGAGCG  
CATGAAAAAGTGCATCCGGTTTGATGGACGGTACTTTGAAAAGCAAAAGGAAATTATGGA  
AGATTCTGAAGGAAAGTGGATACGAATATTAACCTTTTTGAATCCTGGTAAGCGAAAAATCT  
TCCTTAAACCGTAAGGGTAAACTTTCCTCACTAATTTCAAATTGTCATAACTCGGTCAA  
TTTTTATTCGATTGAGCTGATCTTGGTTTTAATCGATAGGTATTGAGTTGATCTTTAAAA  
TGAGACCAAATCATGTCTGCATCTATCTTACTTTTGAAGTTACAGAACCAGTCCCGGTA  
CTTTTGGGACACCCTACGTA

>Btmar2.9.38\_gi-1092455625-gb-MAMS01000011\_1-:269038-269990  
gi-1092455625-gb-MAMS01000011.1-:269038-269990 Bemisia tabaci isolate MEAM1 Scaffold123, whole  
genome shotgun sequence 953 bp

ACTTGTTCTGTAACCTCGAAAGTAAGATAGATACAGACATGATCTTGATCTCATTTTAAA  
GATCAACTCAATACCATCGATTAAACCAAGATCAGCTCAATCGAATAAATATTGACCG  
AGTTATGGCAATTTGAAATCAGCGAGGAAAGTTACGCCTACGGTTTTTAAGGAAGATTC  
TTCATCGCCGTAAATCGAAAAGTCGGCCGATAAAGTGATGCTTATTGTGTTTTTTTATTT  
TCGAGGTGTCATTTATCAACATTTTGTACCATCAAACACAACAGTTGACAGTGCGTATTA  
TTGCAAAGTACTAAAGGAGTTGGGAATGCACATTTCCCGGAAACGGTCGGACTTGAAAGC  
TTCGTGGATACTCCATCAAGACAATGCGCGGCCTCACACATCCAGCTTAACACGTGAATT

TATGAGTAAAAATGGAGTTGAAACAATCCCTCATCCCCCTTATAGCCCTGACTTGGCTCC  
ATGTGATTTTTGGATGTTTCCTACGCTTAAAAAGGAGCTTCGCGGACGAAGATTCGTATC  
GAAGACCGAAATCCAGAATGCAATTCAAAACCTTTTCAACTCCATCCCAGAGGAAGAATT  
CAGGAAAACAATGTTGGATAAGTGGCAAGAGCGCATGAAAAAGTGCATCCGGTTTGATGG  
ACGGTACTTTGAAAAGCAAAAGGAAGTTATGGAAGATTCGGAGGAAAGTGGATACGAATA  
TTTACTTTTTGAATCCTGGTAAGCGAAAAATCTTCCTAAAAACCGTAGGTGTAACTTTC  
CTCACTAATTTCAAATTGTCATAACTCGGTCAATTTTTATTGATTGAGCTGATCTTGGT  
TTAATCGATAGGTATTGAGTTGATCTTTAAATGAAACCAAATCATGTCTGTATCTAT  
CTTACTTTTGAAGTTACAGAACCAGTCCCGGTACTTTTGGGACACCCTACGTA

--

>Btmar2.9.39\_gi-1092455666-gb-MAMS01000003\_1-:1609163-1610142  
gi-1092455666-gb-MAMS01000003.1-:1609163-1610142 Bemisia tabaci isolate MEAM1 Scaffold109,  
whole genome shotgun sequence 980 bp

TACGTAAGGTGTCCCAAAACACCGGGACTTGTTCTGTAACCTCGAAAGTAAGATAGATA  
CAGACATGATCTTGATTTTCAATTTAAAGATCAACTCAATACCTATCGATTAAAACCAAGA  
TCAGCTCAATCGGATAAAAATTGACCGAGTTACGGCAATTTGAAATCAGCGAGGAAAGTT  
TACGCCTACGGTTTTTAAGGAAGATTCTTCATCGCCGTAAATCGAAAAGTCGGCGGATAA  
AGTGATGCTTATTGTGGTTTTTTATTTTCGAGGTGTCATTTATCAACATTTTGTACCATC  
AAACACAACAGTTGACAGTGCGTATTATTGCAAAGTACTAAAGGAGTTGAGAATGCACAT  
TTCCCGGAAACGGTCGGACTTGAAAGCTTCGTGGATACTCCATCAAGACAATGCGCGGCC  
TCACACATCGAGCTTAACACGTGAATTTATGAGTAAAAATGGAGTTGAAACAATCCCTCA  
TCCCCCTTATAGCCCTGACTTGGCTCCATGTGATTTTTGGATGTTTCCTGCGCTTAAAAA  
GGAGCTTCGCGGACGAAGATTCGTATCGAAGACAAAAATCCAGAATGCAATTCAAAACCT  
CTTCAACTCCATCCCAGAGGAAGAATTCAGGAAAACAATGTTGGATAAGTGGCAAGAGCG  
CATGAAAAAGTGCATCCGGTTTGATGGACGGTACTTTGAAAAGCAAAAGGAAGTTATGGA  
AGATTCGGAGGAAAGTGGATGCGAATATTAACCTTTTTGAATCCTGGTAAGCGAAAAATCT  
TCCTAAAAACCGTAGGGGTAACTTTCCTCACTAATTTCAAATTGTCATAACTCGGTCAA  
TTTTTATTGATTGAGCTGATCTAGGTTTTAATCGATAGGTATTGAGTTGATCTTTAAAA  
TGAGACCAAATCATGTCTGCATCTATCTTACTTTTGAAGTTACAGAACCAGTCCCGGTA



CTTTTGGGACACCCTACGTA

>Btmar2.9.40\_gi-1092455481-gb-MAMS01000031\_1-:1436030-1437009

gi-1092455481-gb-MAMS01000031.1-:1436030-1437009 Bemisia tabaci isolate MEAM1 Scaffold17, whole genome shotgun sequence 980 bp

TACATAAGGTGTCCCAAAGCACCGGGACTTGTTCTGTAAGTTCGAAAGTAAGATAGATA  
CAGACATGATCTTGATTTTCAATTTAAAGATCAACTCAATACCTATCGATTAAAACCAAGA  
TCAGCTCAATCGGATAAAAATTGACCGAGTTATGGCAATTTGAAATCAGCGAGGAAAAGTT  
TACGCCTACGGTTTTTAAGGAAGATTCTTCATCGCCGTAAATCGAAAAGTCGGCCGATAA  
AGTGATGCTTATTGTGTTTTTTATTTTCGAGGTGTCATTTATCAACATTTGTACCATC  
AAACACAACAGTTGACAGTGCGTATTATTGCAAAGTAAAGGAGTTGAGAATGCACAT  
TTCCCGGAAACGGTCGGACTTGAAAGCTTCGTGGATACTCCATCAAGACAATGCGCGGCC  
TCACACATCGAGCTTAACACGTGAATTTATGAGTAAAAATGGAGTTGAAACAATCCCTCA  
TCCCCCTTATAGTCCTGACTTGGCTCCATGTGATTTTTGGATGTTTCCTGCGCTTAAAAA  
GGAGCTTCGCGGACGAAGATTCGTATCGAAGACAAAAATCCAGAATGCAATTCAAACCTT  
CTTCAATTCATCCCAGAGGAAGAATTCAGGAAAACAATGTTGGATAAGTGGCAAGAGCG  
CATGAAAAAGTGATCCGGTTTGATGGACGGTACTTTGAAAAGCAAAAGGAAGTTATGGA  
AGATTCGGAGGAAAGTGGATACGAATATTAACCTTTTGAATCCTGGTAAGCGAAAAATCT  
TCCTAAAACCGTAGGGGTAACTTTCCTACTAATTTCAAATTGTCATAACTCGGTCAA  
TTTTTATTTGATTGAGCTGATCTTGGTTTTAATCGATAGGTATTGAGTTGATCTTTAAAA  
TGAGACCAAAATCATGTCTGCATCTATCTTACTTTTGAAGTTACAGAACCAGTCCCGGTA  
CTTTTGGGACACCCTACGTA

--

>Btmar2.9.41\_gi-1092455481-gb-MAMS01000031\_1-:997601-998552

gi-1092455481-gb-MAMS01000031.1-:997601-998552 Bemisia tabaci isolate MEAM1 Scaffold17, whole genome shotgun sequence 952 bp

ACTTGTTCTGTAAGTTCGAAAGTAAGATAGATACAGACATGATCTTGATCTCATTTTAA  
GATCAACTCAATACCCATCGATTAAAACCAAGATAAGCTCAATCGGATAAAAATTGACCG  
AGTTATGGCAATTTGAAATCAGCGAGGAAAGTTTACGCCTACGGTTTTTAAGGAAGATTC  
TTCATCGTCGTAAATCGAAAAGTCGGCCGATAAAGTGATGCTTATTGTGTTTTTTATTT  
TCGAGGTGTCATTTATCAACATTTGTACCATCAAACACAACAGTTGACAGTGCGTATTA

TTGTAAAGTACTAAAGGAGTTGAGAATGCACATTTCCCGGAAACGGTCGGACTTGAAAGC  
TTCGTGGATACTCCATCAAGACAATGCGCGGCCTCACACATCGAGCTTAACACGTGAATT  
TATGAGTAAAAATGGAGTTGAAACAATCCCTCATCCCCCTTATAGCCCTGACTTGGCTCC  
ATGTGATTTTTGGATGTTTCCTACGCTTAAAAAGGAGCTTCGCGGACGAAGATTCGTATC  
GAAGACCGAAATCCAGAATGCAATTCAAAACCTTTTCAACTCCATCCCAGAGGAAGAATT  
CAGGAAAACAATGTTGGATAAGTGGCAAGAGCGCATGAAAAAGTGCATCCGGTTTGATGG  
ACGGTACTTTGAAAAGCAAAAGGAAGTTATGGAAGATTCGGAGGAAAGTGGATAGGAATA  
TTAACTTTTGAATCCTGGTAAGCAAAAAATCTTCCTAAAAACCGTAGGGGTAAACTTTC  
CTCACTAATTTCAAATTGTCATAACTCGGTCAATTTTTATTGATTGAGCTGATCTTGGT  
TTTAATCGATAGGTTTGAGTTGATCTTTAAATGAGACCAAAATCATGTCTGTATCTATC  
TTACTTTTGAAGTTACAGAACCAGTCCCGGTACTTTTGGGACACCCTACGTA

--

>Btmar2.9.42\_gi-1092455481-gb-MAMS01000031\_1-:1172648-1173308  
gi-1092455481-gb-MAMS01000031.1-:1172648-1173308 Bemisia tabaci isolate MEAM1 Scaffold17,  
whole genome shotgun sequence 661 bp

ACTTGTTCTGTAACCTTCGAAAGTAAGATAGATACAGACATGATCTTGATCTCATTTTAAA  
AATCAACTCAATACCCATCGATTAAAACCAAGATCGATTAAAACCAAGATCAGCTCAATC  
GGATAAAAATTGACCGAGTTATGGCAATTTGAAATCAGCGAGGAAAGTTTACGCCTACGG  
TTTTTAAGGAAGATATTCTTCATCGCCGTAAATCGAAAAGTCGGCCGATAAAGTGATGCT  
TATTGTGTTTTTTTATTTTCGAGGTGTCATTTATCAACATTTTGTACCATCAAACACAAC  
AGTTGACAGTGCCTATTATTGCAAAGTACTAAAGGAGTTGAGAATGCACATTTCCCGGAA  
ACGGTCGGACTTGAAAGCTTCGTGGATACTCCATCAAGACAATGCGCGGCCTCACACATC  
GAGCTTAACACGTGAATTTATGAGTAAAAATGGAGTTGAAACAATCCCTTATCCCCTTTA  
TAGCCCTGACTTGGCTCCATGTGATTTTTGGATGTTTCCTACGCTTAAAAAGGAGCTTCG  
CGGACGAAGATTCGTATCGAAGACCGAAATCCAGAATGCAATTCAAAACCTTTTCAACTC  
CATCCCAGAGGAAGAATTCAGGAAAACAATGTTGGATAAGTGGCAAGAGCGCATGAAAAA

G

--

>Btmar2.9.43\_gi-1092436163-gb-MAMS01009375\_1-:1502925-1503905  
gi-1092436163-gb-MAMS01009375.1-:1502925-1503905 Bemisia tabaci isolate MEAM1 Scaffold4704,  
whole genome shotgun sequence 981 bp

TACATAAGGTGTCCCAAAGCACCGGGACTTGTTCTGTAACCTTCAAAAGTAAGATAGATA  
CAGACATGATCTTGATTTTATTTTAAAGATCAACTCAATACCTATCGATTAAAACCAAGA  
TCAGCTCAATCGAATAAAAATTGACCGAGTTATGGCAATTTGAAATCAGCGAGGAATGTT  
TACGCCTACGGTTTTTAAGGAAGATTCTTCATCGCCGTAAATCGAAAAGTCGGCCGATAA  
AGTGATGCTTATTGTGTTTTTTATTTTCGAGGTGTCATTTATCAACATTTTGTACCATC  
AAACACAACAGTTGACAGTGCGTATTATTGCAAAGTACTAAAGGAGTTGAGAATGCACAT  
TTCCCGGAAACGGTCGGACTTGAAAGCTTCGTGGATACTCCATCAAGTCAATGCGCGGCC  
TCACACATCGAGCTTAACACGTGAATTTATGAGTAAAAATGGAGTTGAAACAATCCCTCA  
TCCCCCTTATAGCCCTGACTTGGCTCCATGTGATTTTTGGATGTTTCCTGCGCTTAAAAA  
GGAGCTTCGCGGACGAAGATTCGTATCGAAGACAAAAATCCAGAATGCAATTCAAACCTT  
CTTCAACTCCATCCCAGAGGAAGAATTCAGGAAAACAATGTTAGATACGTGGCAAGAGCG  
CATGAAAAAGTGCAATTCGGTTTGATGGACGGTACTTTGAAAAGCAAAAGGAAGTTATGGA  
AGATTCGGAGGAAAGTGGATACGAATATTAACCTTTTTGAATCCTGGTAAGCGAAAAATCT  
TCCTTAAAAACCGTAGGGGTAACTTTCTCACTAATTTCAAATTGTCATAACTCGGTCA  
ATTTTTATTCGATTGAGCTGATCATGGTTTAAATCGATAGGTATTGAGTTGATCTTTAA  
ATGAAACCAAAATCATGTCTGCATCTATCTTACTTTTGAAGTTACAGAACCAGTCCCGGT  
ACTTTTGGGACACCCTACGTA

>Btmar2.9.44\_gi-1092436163-gb-MAMS01009375\_1-:152222-153201  
gi-1092436163-gb-MAMS01009375.1-:152222-153201 Bemisia tabaci isolate MEAM1 Scaffold4704,  
whole genome shotgun sequence 980 bp

TACATAGGGTGTCCCAAAGTATCGGGACTGGTTCTGTAACCTTGAAGTACGATAGATA  
CAGACATGATCTTGGTCTCATTTTAAAGATCAACTCAATACCTATCGATAAGACCAAGAT  
CAGCTCAATCGGATAAAAATTGACTGAGTTATGGCAATTTAAAATCAGTGAGGAAAGTTT  
ACCCCTACAGTTTATAAGGAAGATTCTTCATCGCCGTAAATCGAAAAATCGGCCTGTAA  
GTGAAGCTTATTGTGTTTTTTGATTTTCGAGGTGTCATTTATCAACATTTTGTACCATCA  
AACACAACAGTTGACAGTGCGTATTGTTGCAAAGTTCTAAAGGAGTTAAGAATGCACATC  
TCCCGGAAACGGCCAGACTTGAAAGCTTCATGGATACTTCATCAAGACAATACGCGGCCT

CACACATCCAGCTTAACACGTAAATTTATGAGTAAAAATGGAGTTGAAACCATCCCTCAT  
CCCCCTTATAGCCCTGACTTGGCTCCATGTGATTTTTGGATGTTTCCTACGCTAAAAAAG  
GAGCTTCGCGGACAAAGATTCTGAATCGAAGACCGAAATCCAGAATGCAGTTCAGAACTTT  
TTCAACGCCATCCCAGAGGAAAAATGCAGGAAAACAATGTTGGATAAGTGGCAAGAGCGC  
ATGAAAAAGTGCATCCGGTTTGATGGACAGTACTTTGAAAAGCAAAAGGAAGTTATGGAA  
GATTCAGAGGAAAGCGGATACGAATATTAATTTTTGAATCCTGGTAAGCGAAAAATCTT  
CCTAAAAAACCGTGGGGGTAACTTTCTCACTGATTTCAAATTGCCATAACTCGGTCAA  
TTTTTATCTGATTGAGCTGATCTTGGTTTTAATCGATAGGTATTGAGTTGATCTTTAAAA  
TGAAACCAAGATTATGTCTGTACCTATCTTACTTTGAAGTTACAGAAGCAGTCCCGGTA  
CTTTGGGACACCCTATGTA

--

>Btmar2.9.45\_gi-1092447432-gb-MAMS01003516\_1-:292909-293888  
gi-1092447432-gb-MAMS01003516.1-:292909-293888 Bemisia tabaci isolate MEAM1 Scaffold2242,  
whole genome shotgun sequence 980 bp

TACATAAGGTGTCCCAAAGCACCGGGACTTGTTCTGTAACCTCGAAAGTAAGATAGATA  
CAGACATGATCTTGATTTTATTTTAAAGATCAACTCAATACCTATCGATTAAAACCAAGA  
TCAGCTCAATCGGATAAAAATTGACCGAGTTATGGCAATTTGAAATCAGCGAGGAAAGTT  
TACGCCTACGGTTTTTAAGGAAGATTCTTCATCGCCGTAAATCGAAAAGTCGGCCGATAA  
AGTGATGCTTATTGTGTTTTTTATTTTCGAGGTGTCATTTATCAACATTTTGTACCATC  
AAACACAACAGTTGACAGTGCGTATTATTGCAAAGTACTAAAGGAGTTGAGAATGCACAT  
TTCCCGGAAACGGTCGGACTTGAAAGCTTCGTGGATACTCCATCAAGACAATGCGCGGCC  
TCACACATCGAGCTTAACACGTGAATTTATGAGTAAAAATGGAGTTGAAACAATCCCTCA  
TCCCCCTTATAGCCCTGACTTGGCTCCATGTGATTTTTGGATGTTTCCTACGCTTAAAAA  
GGAGTTTCGCGGACGAAGATTCTGATCGAAGACCGAAATCCAGAATGCAATTCAAACCTT  
CTTCAACTCCATCCCAGAGGAAGAATTCAGAAAAACAATGTTGGATAAGTGGCAAGAGCG  
CATGAAAAAGTGCATCCGGTTTGATGGACGGTACTTTGAAAAGCAAAAGGAAGTTATGGA  
AGATTCGGAGGAAAGTGGATACGAATATTAATTTTTGAATTCTGGTAAGGGAAAAATCT  
TCCTAAAAACCGTAGGGGTAACTTTCTCACTAATTTCAAATTGTCATAACTCGGTCAA  
TTTTTATTCGATTGAGCTGATCTTGGTTTTAATCGATAGGTATTGAGTTGATCTTTAAAA  
TGAGACCAAATCATGTCTGTGTCTATCTTACTTTGAAGTTACAGAACCAGTCCCGGTA

CTTTTGGGACACCCTACGTA

--

>Btmar2.9.46\_gi-1092455544-gb-MAMS01000025\_1-:4195632-4196613  
gi-1092455544-gb-MAMS01000025.1-:4195632-4196613 Bemisia tabaci isolate MEAM1 Scaffold147,  
whole genome shotgun sequence 982 bp

TACAAAAGGTGTCACAAAAGCACCGGGACTTGTTCTGTAACCTCGAAAGTAAGATGGATA  
CAGACATGATCTTGATCTCATTTTAAAGATCAACTCAATACCTATCGATTAACCAAGA  
TCAGCTCAATCGGATAAAAATTGGAAAAAGTTATGGCCCATTTGAAATCAGCGAGGAAAG  
TTTACGCCTACGGTTTTTAAGGAAGATTCTTCATCGCCGTAAATCGAAAATTCGGCCTAT  
AAAGTGATGCTTATTGTTTTTTTCATTTTCGAGGTGTCATTTATCAACATTTTGTACC  
ACCAAACACAACAGTTGACAGTGCGTATTATTGCAAAGTGCTAAAGGAGTTGAGAATGCA  
CATTTCCCGGAAACGGTCGGACTTGAAAGCTTCGTGGATACTCCATCAAGACAAGCGCGG  
CCTCACACATCGAGCTTAACACGTGAATTTATGAGTAAAAATGGAGTTGAAACAATCCCT  
CATCCCCCTTACAGCCCTGACTTGGCTCCATGTGATTTTGGATGTTTCCTACACTTAA  
AGGGAGCTTCGTGGACGAAGATTCGAATCGAAGACCGAAATCCAGAATGCAATTCAAAAC  
TTTTTCAACGCCATCCCAGAGGAAGAATTCAGGAAAACAATGTTGGATAAGTGGCAAGAG  
CGCATGAAAAAGTGCATCCGGTTTGATGGACGGTACTTTGAAAAGCAAAAGGAAGTTATG  
GAAGATTCGGAGGAAAGTGGATACGAATATTAACTTTTTGAATCCTGGTAAGCGAAAAAT  
CTTCCTAAAAACCGTAGGGGTAACTTTCTCACTAATTTCAAATTGTCATAACTCGGTC  
AATTTTATCCGATTGAGCTGATCTTGTTTAAATCGATAGGTATTGAGTTAATCTTTAA  
AATGAGACCAAAATCATGTCTGTATCTATCTTACTTTTGAAGTTACAGAACCAGTCCCGG  
TACTTTTGGGACACCCTACGTA

--

>Btmar2.9.47\_gi-1092444267-gb-MAMS01004927\_1-:1612240-1613219  
gi-1092444267-gb-MAMS01004927.1-:1612240-1613219 Bemisia tabaci isolate MEAM1 Scaffold2816,  
whole genome shotgun sequence 980 bp

TACGTAAGGTGTCCAAAAGCACCGGGACTTGTTCTGTAACCTCGAAAGTAAGATAGATA  
CAGACATGATCTTGATTTCATTTTAAAGATCAACTCAATACCTATCGATTAACCAAGA

TCAGCTCAATCGGATAAAAATTGACCGAGTTATGGCACTTTGAAATCAGCGAGGAAAAGTT  
TACGCCTACGGTTTTTAAGGAAGATTCTCCATCGCCGTAAATCGAAAAGTCGGCCGATAA  
AGTGATGCTTATTGTGTTTTTTATTTTCGAGGTGTCATTTATCAACATTTTGTACCATC  
AAACACAACAGTTGACAGTGCGTATTATTGCAAAGTAGTAAAGGAGTTGAGAATGCACAT  
TTCCCGGAAACCGTCGGACTTGAAAGCTCCGTGGATACTCCATCAAAACAATGCGCAGCC  
TCACACATCGAGCTTAACACGTGAATTTATGAGTAAAAATGGAGTTGAAACAATCCCTCA  
TCCCCCTTATAGCGCTGACTTGGCTCCATGTGATTTTTGGATGTTTCCACGCTTAAAAA  
GGAGCTTCGCGGACGAAGATTCGTATCGAAGACCGAAATCCAGAATGCAATTCAAACCTT  
CTTCAACTCCATCCCAGAGGAATAATTCAGGAAAACAATGTTGGATAAGTGGCAAGAGCG  
CATGAAAAAGTGCATCCGGTTTGATGGACGGTACTTTGAAAAGCAAAAGGAAGTTATGGA  
AGATTCCGAGGAAAGTGGATACGAATATTAACCTTTTTAAATCCTGGTAAGCGAAAAATCT  
TCCTAAAAACCGTAGGGGTAACTTTCCTCACTAATTTCAAATTGTCATAACTCGGTCAA  
TTTTTATTCGATTGAGCTGATCTTGGTTTTAATCGATAGGTATTGAGTTGATCTTTAAAA  
TGAGACCAAAATCATGTCTGTATCTATCTTAATTTTGAAGTTACAGAACCAGTCCCGGTA  
CTTTTGGGACACCCTACGTA

--

>Btmar2.9.48\_gi-1092454879-gb-MAMS01000194\_1-:363388-364122  
gi-1092454879-gb-MAMS01000194.1-:363388-364122 Bemisia tabaci isolate MEAM1 Scaffold610, whole  
genome shotgun sequence 735 bp

TGCGTTTTGTGTTTTTTATTTTAGAGGTGTCATTTATCAACATTTTGTACCATCAAACA  
CAACAGTTGACAGTGCGTAATATTGCAAAGTACTAAAGGAGTTGAGAATGCACATTTCTT  
GGAACCGGTCGGACTTGAAAGCTCCGTGGATACTCCATCAAAACAATGCGCGGCCTCACA  
CATCGAGCTTAACACGTGAATTCATGAGTAAAAATGGAGTTGAAACAATCCCTCATCCCC  
CTTATAGCGCTGACTTGGCTCCATGTGATTTTTGGATGTTTCTGCGCTTAAAAAGGAGC  
TTCGCGGACGAAGATTCGTATCGAAGACCGAAATCCAGAATGCAATTCAAACCTTCTTCA  
ACTCCATCCCAGAGGAAGAATTCAGGAAAACAATGTTGGATAAGTGGCAAGAGCGCATGA  
AAAAGTGCATCCGGTTTGATGGACGGTACTTTGAAAAGCAAAAGGAAGTTATGGAAGATT  
CGGAGGAAAGTGGATACGAATATTAACCTTTTTAAATCCTGGTAAGCGAAAAATCTTCCTA  
AAAACCATAGGGGTAACTTTCCTCACTAATTTCAAATTGTCATAACTCGGTCAATTTTT

ACTCGATTGAGCTGATCTTGGTTTTAATCGATAGGTATTGAGTTGATCTTTAAAATGAGA  
CCAAAATCATGTCTGTATCTATCTTACTTTTGAAGTTACAGAACCGGTCCCGGTACTTTT  
GGGACACCCTACGTA

--

>Btmar2.9.49\_gi-1092453820-gb-MAMS01000625\_1-:172989-173968  
gi-1092453820-gb-MAMS01000625.1-:172989-173968 Bemisia tabaci isolate MEAM1 Scaffold1131,  
whole genome shotgun sequence 980 bp

TACATAAGGTGTCCCAAAGCACAGGGACTTGTTCTGTAAGTTCGAAAGTAAGATAGATA  
CAGACATGATCTTGATTTCATTTTAAAGATCAACTCAATACCTATCGATTTAAACCAAGA  
TCAGCTCAATCGGATAAAAATTGACCGAGTTATGGCAATTTGAAATCAGCGAGGAAAAGTT  
TACGCCTACGGTTTTTAAGGAAGATTCTTCATCGCCGTAAATCGAAAAGTCGGCCGATAA  
AGTGATGCTTATTGTGTTTTTTATTTTCGAGGTGTCATTTATCAACATTTGTACCATC  
AAACACAACAGTTGACAGTGCGTATTATTGCAAAGTACTAAAGGAGTTGAGAATGCACAT  
TTCCCGGAAACGGTCGGACTTGAAAGCTTCGTGGATACTCCATCAAGACAATGCGCGGCC  
TCACACATCGAGCTTAACACGTGAATTTATGAGTAAAAATGGAGTTGAAACAATCCCTCA  
TCCCCCTTATAGCCCTGACTTGGCTCCATGTGATTTTTGGATGTTTCCTGCGCTTAAAAA  
GGAGCTTCGCGGACGAAGATTCGTATCGAAGACAAAAATCCAGAATGCAATTCAAAACCTT  
CTTCAACTCCATCCCAGAGGAAGAATTCAGGAAAACAATGTTGGATAAGTGGCAAGAGCG  
CATGAAAAAGTGCATCCGGTTTGATGGACGGTACTTTGAAAAGCAAAAGGAAGTTATGGA  
AGATTTCGGAGGAAAGTGGATACGAATATTAACTTTTTGAATCCTGGTAAGCGAAAAATCT  
TCCTAAAAACCGTAGGGGTAACTTTCCTCACTAATTTCAAATTGTCATAACTCGGTCAA  
TTTTTATTCGATTGAGCTGATCTTGGTTTTAATCGATAGGTATTGAGTTGATCTTTAAAA  
TGAGACCAAAATCATGTCTGCATCTATCTTACTTTTGAAGTTACAGAACCAGTCCCGGTA  
CTTTTGGGACACCCTACGTA

--

>Btmar2.9.50\_gi-1092455247-gb-MAMS01000092\_1-:1445738-1446717  
gi-1092455247-gb-MAMS01000092.1-:1445738-1446717 Bemisia tabaci isolate MEAM1 Scaffold310,  
whole genome shotgun sequence 980 bp

TACATAAGGTGTCCCAAAGCACCGGGACTTGTTCTGTAAGTTCGAAAGTAAGATAGATA

CAGACATGATCTTGATTTTCAATTTAAAGATCAACTCAATACCTATCGATTAAAACCAAGA  
TCAGCTCAATCGGATAAAAATTGACCGAGTTATGGCAATTTGAAATCAGCGAGGAAAAGTT  
TACGCCTACGGTTTTTAAGGAAGATTCTTCATCGCCGTAAATCGAAAAGTCGGCCGATAA  
AGTGATGCTTATTGTGTTTTTTATTTTCGAGGTGTCATTTATCAACATTGTGTACCATC  
AAACACAACAGTTGACAGTGCGTATTATTGCAAAGTAAAGGAGTTGAGAATGCACAT  
TTCCCGGAAACGGTCGGACTTGAAAGCTTCGTGGATACTCCATCAAGACAATGCGCGGCC  
TCACACATCGAGCTTAACACGTGAATTTATGAGTAAAAATGGAGTTGAAACAATCCCTCA  
TCCCCCTTATAGCCCTGACTTGGCTCCATGTGATTTTTGGATGTTTCCTGCGCTTAAAAA  
GGAGCTTCGCGGACGAAGATTCGTATCGAAGACAAAAATCCAGAATGCAATTCAAAACCTT  
CTTCAACTCCATCCCAGAGGAAGAATTCAGGAAAACAATGTTGGATAAGTGGCAAGAGCG  
CATGAAAAAGTGCATCCGGTTTGATGGACGGTACTTTGAAAAGCAAAAGGAAGTTATGGA  
AGATTCGGAGGAAAGTGGATACGAATATTAACTTTTGAATCCTGGTAAGCGAAAAATCT  
TCCTAAAAACCGTAGGGGTAACTTTCCTCACTAATTTCAAATTGTCATAACTCGGTCAA  
TTTTTATTGATTGAGCTGATCTTGGTTTTAATCGATAGGTATTGAGTTGATCTTTAAAA  
TGAGACCAAAATCATGTCTGCATCTATCTTACTTTTGAAGTTACAGAACCAGTCCCGGTA  
CTTTTGGGACACCCTACGTA

>Btmar2.9.51\_gi-1092455247-gb-MAMS01000092\_1-:1958609-1959587  
gi-1092455247-gb-MAMS01000092.1-:1958609-1959587 Bemisia tabaci isolate MEAM1 Scaffold310,  
whole genome shotgun sequence 979 bp

TACATAAGGTGTCCCAAAGCACCGGGACTTGTTCTGTAACCTTCGAAAGTAAGATAGATA  
CAGACATGATCTTGATTTTCAATTTAAAGATCAACTTAATACCTATCGATTAAAACCAAGA  
TCAGCTCAATCGGATAAAAATTGACCGAGTTATGGCAATTTGAAATCAGCGAGGAAAAGTT  
TACGCCTACGGTTTTTCAGGAAGATTCTTCATCGCCGTAAATCGAAAAGTCGGCCGATAA  
AGTGATGCTTATTGTGTTTTTTATTTTCGAGGTGTCATTTATCAACATTTGTACCATCA  
AACACAACAGTTGACAGTGCGTATTATTGCAAAGTAAAGCAGTTGAGAATGCACATT  
TCCCGGAAACGGTCGGACTTGAAAGCTTCGTGGATACTCCATCAAGACAATGCGCGGCCT  
CACACATCGAGCTTAACACGTGAATTTATGAGTAAAAATGGAGTTGAAACAATCCCTCAT  
CCCCCTTATAGCCCTGACTTGGCTCCATGTGATTTTTGGATGTTTCCTACGCTTAAAAAG  
GAGCTTCGTGGACGAAGATTCGAATCGAAGACCGAAATCCAGAATGCAATTCAAAACCTT  
TTCAACGCCATCCCAGAGGAAGAATTCAGGAAAACAATGTTGGATAAGTGGCAAGAGCGC



ATGAAAAAGTGCATCCGGTTTGATGGACGGTACTTTGAAAAGCAAAAGGAAGTTATGGAA  
GATTCGGAGGAAAAGTGGATACGAATATTAACTTTTGAATGCTGGTAAGCGAAAAATCTT  
CCTAAAAACCGTAGGGGTAACTTTCCTCACTAATTTCAAATTGTCATAACTCGGTCAAT  
TTCTATCCGATTGAGCTGATCTTGGTTTTAATCGATAGGTATTGAGTTGATCTTTAAAAT  
GAAAGCAAAATCATGTCTGTATCTATCTTACTTTTGAAGTTACAGAACCAGTCCCGGTAC  
TTTTGAGACACCCTACGTA

--

>Btmar2.9.52\_gi-1092452725-gb-MAMS01001096\_1-:1613-2592  
gi-1092452725-gb-MAMS01001096.1-:1613-2592 Bemisia tabaci isolate MEAM1 Scaffold1294, whole  
genome shotgun sequence 980 bp

TACATAAGGTGTCCCAAAGCACCGGGACTTGTTCTGTAACCTCGAAAGTAAGATAGATA  
CAGACGTGATCTTGATCTCATTTTAAAGATCAACTCAATACCTATCGATTAACCAAGA  
TCAGCTCAATCGGATTAATAATTGACCGAGTTATGGCAATTTGAAATCAGCGAGGAAAAGTT  
TACGCCTACGGTTTTTAAGGAAGATTCTTCATCGCCGTAAATCGAAAAGTCGGCCGATAA  
AGTGATGCTTACTGTGTTTTTTATTTTCGAGGTGTCATTTATCAACATTTTGTACCATC  
AAACACAACGGTTGACAGTGCGTATTATTGCAAAGTACTAAAGGAGTTGAGAATGCACAT  
TTCCCGGAAACGGTCGGACTTGAAAGCTTCGTGGATACTCCATCAAGACAATGCGCGGCC  
TCACACATCGAGCTTAACACGTGAATTTATGAGTAAAAATGAAGTTGAAACAATCCCTCG  
TCCCCCTTATAGCCCTGACTTGGCTCCATGTGATTTTTGGATGTTTCCTACGCTTAAAAA  
GGAGCTTCGCGGACGAAGATTCGTATCGAAGACCGAAATCCAGAATGCAATTCAAAACCT  
CTTCAACTCCATCCCAGAGGAAGAATTCAGGAAAACAATGTTGGATAAGTGGCAAGAGCG  
CATGAAAAAGTGCATCCGGTTTGATGGACGGTACTTTGAAAAGCAAAAGGAAGTTATGGA  
AGATTCGGAGGAAAACGGATACGAATATTAACTTTTTAAATCCTGGTAAGCGAAAAATCT  
TCCTAAAAACCGTAGGGGTAACTTTCCTCACTAATTTCAAATTGTCATAACTCGGTCAA  
TTTTTATTCGATTGAGCTGATCTTGGTTTTAATCGATAGGTATTGAGTTGATCTTTAAAA  
TGGGACCAAAATCATGTCTGTATCTATCTTACTTTTGAAGTTACAGAACCAGTCCCGGTA  
CTTTGGGACACCCTACGTA

--

>Btmar2.9.53\_gi-1092453460-gb-MAMS01000794\_1-:1634284-1635265  
gi-1092453460-gb-MAMS01000794.1-:1634284-1635265 Bemisia tabaci isolate MEAM1 Scaffold1185,  
whole genome shotgun sequence 982 bp

TACGTAAGGTGTCCCAAAGCACCGGGACTTGTTCTGTAAGTTCGAAGTAAGATAGATAC  
AGACATGATCTTGATCTCATTTTAAAGATCAACTCAATACCTATCGATTAAAACCAAGAT  
CAGCTCAATCGGATAAAAATTGACCGAGTTATGGCAATTTTAAATCAGCGAGGAAAGTTT  
ACGCCTACGGTTTTTAAGGAAGATTCTTCATCGCCGTAAATCGAAAAGTCGGCCTATAAA  
GTGATGCTTATTGTGTTATTTATTTTCGAGGTGTCATTTAAGTATCAACATTTTGTACC  
ACCAAACACAACAGTTGAGAGTGCGTATTATTGCAAAGTGCTAAAGGAGTTGAGAATGCA  
CATTTCCCGGAAACGGTCGGACTTGAAAGCTTCGTGGATACTCCATCAAGACAAGCGCGG  
CCTCACACATCGAGCTTAACACGTGAATTTATGAGTGAAAATGGAGTTGAAACAATCCCT  
CATCCCCCTTACAGCCCTGACTTGGCTCCATGTGATTTTTGGATGTTTCCTACGCTTAAA  
AAGAAGCTTCGCGGACGAAGATTGCAATCGAAGACCGAAATCCAGAATGCAATTCAAAAC  
TTTTTCAACGCCATCCCAGAGGAAGAATTGAGAAAACAATGTTGGATAAGTGGAAGAG  
CGCATGAAAAAGTGCATCCGGTTTGATGGACGGTACTTTGAAAAGCAAAAGGAAGTTATG  
GAAGATTCGGAGGAAAGTGGATACGAATATTAACCTTTTTGAATCCTGGTAAGCGAAAAAT  
CTTCCTAAAAACCGTAGGGGTAACTTTCTCACTAATTTCAAATTGTCATAACTCGGTC  
AATTTTTATTGATTGAGCTGATCTTGTTTTAATCGATAGGTATTGAGTTGATCTTTAA  
AATGAGACCAAAATCATGTCTGTATCTATCTTACTTTTGAAGTTACAGAACCAGTCCCGG  
TACTTTTGGGACACCCGACGTA

>Btmar2.9.54\_gi-1092453460-gb-MAMS01000794\_1-:2500974-2501738  
gi-1092453460-gb-MAMS01000794.1-:2500974-2501738 Bemisia tabaci isolate MEAM1 Scaffold1185,  
whole genome shotgun sequence 765 bp

TACATAAGGTGTCCCAAAGCACCGGGACTTGTTCTGTAAGTTCGAAAGTAAGATAGATA  
CAGACATGATCTTGATCTCATTTTAAAGATCAACTCAATACCTATCGATTAAAACCAAGA  
TCAGCTCAATCGGATAAAAATTGACCGAGTTATGGCAATTTTAAATCAGCGAGGAAAGTT  
TACGCCTACGGTTTTTAAGGAAGATTCTTCATCGCCGTAAATCGAAAAGTCGGCCGATAA  
AGTGATGCTTATTGTGTTATTTATTTTCGAGGTGTCATTTAAGTATCAACATTTTGTAC  
CACCAAATACAACAGTTGAGAGTGCGTATTATTGCAAAGTGCTAAAGGAGTTGAGAATGC  
ACATTTCCCGGAAACGGTCGGACTTGAAAGGTTTCGTGGATACTCCATCAAGACAAGCGCG

GCCTCACACATCGAGCTTAACACATGAATTTATGAGTAAAAATGGAGTTGAAACAATCCC  
TCATCCCCCTTACAGCCCTGACTTGGCTCCATGTGATTTTTGGATGTTTCCTACGCTTAA  
AAAGAAGCTTCGCGGACGAAGATTCGAATCGAAGACCGAAATCCAGAATGCAATTCAAAA  
CTTTTCAACGCCATCCCAGAGGAAGAATTCAGGAAAACAATGTTGGATAAGTGGAAAGA  
GCGCATGAAAAAGTGCATCCGGTTTGATGGACGGTACTTTGAAAAGCAAAAGGAAGTTAT  
GGAAGATTCGGAGGAAAGTGGATACGAATATTAACTTTTTGAATC

--

>Btmar2.9.55\_gi-1092454689-gb-MAMS01000243\_1-:2400326-2401063  
gi-1092454689-gb-MAMS01000243.1-:2400326-2401063 Bemisia tabaci isolate MEAM1 Scaffold73,  
whole genome shotgun sequence 738 bp

TGCGTTTTGTGTTTTTTATTTTCGAGGTGTCATTTATCAACATTTTGTACCATCAAACA  
CAACAGTTGACAGTGCGTATTATTGCAAAGTACTAAAGGAGTTGAGAATGCACATTTCCC  
GGAAACGGTCGGACTTGAAAGCTCCGTGGATACTCCATCAAAACAGTGCGCAGCCTCACA  
CATCGAGCTTAACACGTGAATTTATGAGTAAAAATGGAGTTGAAACAATCCCTCAACCCC  
CTTATAGCGCTGACTTGGCTCCATGTGATTTTTGGATGTTTCCCACGCTTAATAAAAAGG  
AGCTTCGCGGACGAAGATTCGTATCGAAGACCGAAATCCAGAATGCAATTCAAAACCTCT  
TCAACTCCATCCCAGAGGAAGAATTCAGGAAAACAATGTTGGATAAGTGGCAAGAGCGCA  
TGAAAAAGTGCATCCGGTTTGATGGACGGTACTTTGAAAAGCAAAAGGAAGTTATGAAAG  
ATTCGGAGGAAAACGGATACGAATATTAACTTTTTAAATCCTGGTAAGCGAAAAATCTTC  
CTAAAAACCGTAGGGGTAACTTTCCTCACTAATTTCAAATTGTCATAACTCGGTCAATT  
TTTATTCGATTGAGCTGATCTTGTTTTAATCGATAGGTATTGAGTTGATCTTTAAAATG  
AGACCAAAATCATGTCTGCATCTATCTTACTTTTGAAGTTACAGAACCAGTCCCGGTACT  
TTTGGGACACCCTACGTA

--

>Btmar2.9.56\_gi-1092455188-gb-MAMS01000105\_1-:2966066-2967044  
gi-1092455188-gb-MAMS01000105.1-:2966066-2967044 Bemisia tabaci isolate MEAM1 Scaffold343,  
whole genome shotgun sequence 979 bp

TACATAAGGTGTCCCAAAGCACCGGGACTTCTTCTGTAACCTCAAAAGTAAGATAGATA  
CAGACATGATCTTGATTTCAATTTAAAGATCAACTCAATACCTATCGATTAAACCCAAGA  
TCAGCTCAATCGGATAAAAATTGACCGAGTTATGGCAATTTGAAATCAGCGAGGAAAAGTT  
TACGCCTACGGTTTTTAAGGAAGATTCTTCATCGCCGTAAATCGAAAAGTCGGCCGATAA  
AGTGATGTTTATTGTGTTTTTTATTTTCGAGGTGTCATTTATCAACATTTTGTACCATC  
AAACACAACAGTTGACAGTGCGTATTATTGCAAAGTACTAAAGGAGTTGAGAATGCACAT  
TTCCCGGAAACGGTCGGACTTGAAAGCTTCGTGGATACTCCATCAAGACAATGCGCGGCC  
TCACACATCGAGCTTAACACATGAATTTATGAGTAAAAATGGAATTGAAACAATCCCTCA  
TCCCCCTTTTAGCCCTGACTTGGCTCCATGTGATTTTTGGATGTTTCCTACGCTTAAAAA  
GGAGCTTCGCGGACGAAGATTCGTATCGAAGACCGAAATCCAGAATGCAATTCAAACCTT  
CTTCAACTCCATCCCAGAGGAAGAATCAGGAAAACAATGTTGGATAAGTGGCAAGAGCGC  
ATGAAAAAGTGCAATCGGTTTGATAGACGGTACTTTGAAAAGCAAAAGGAAGTTATGGAA  
GATTCGGAGGAAAGTGGATACGAATATTAACTTTTGAATCCTGGTAAGCGAAAAATCTT  
CCTAAAAACCGTAGGGGTAACTTTCCTCACTAATTTCAAATTGTCATAACTCGGTCAAT  
TTTTATTTGATTGAGCTGATCTTGGTTTTAATCGATAGGTATTGAGTTGATCTTTAAAT  
GAGACCAAAATCATGCCTGTATCTATCTTACTTTGAAGTTACAGAACCAGTCCCGGTAT  
TTTTGGGACACCCTACGTA

--

>Btmar2.9.57\_gi-1092455225-gb-MAMS01000096\_1-:296676-297655  
gi-1092455225-gb-MAMS01000096.1-:296676-297655 Bemisia tabaci isolate MEAM1 Scaffold322, whole  
genome shotgun sequence 980 bp

TACATAAGGTGTCCCAAAGCACCGGGACTTGTTCTGTAACCTCGAAAGTAAGATAGATA  
CAGACATGATCTTGATTTCAATTTAAAGATCAACTCAATACCTATCGATTAAAACCAAGA  
TCAGCTCAATCGGATAAAAATTGACCGAGTTATGGCAATTTGAAATCAGCGAGGAAAAGTT  
TACGCCTACGGTTTTTAAGGAAGATTCTTCATCGCCGTAAATCGAAAAGTCGGCCGATAA  
AGTGATGCTTATTGTGTTTTTTATTTTCGAGGTGTCATTTATCAACATTTTGTACCATC  
AAACACAACAGTTGACAGTGCGTATTATTGCAAAGTACTAAAGGAGTTGAGAATGCACAT

TTCCCGGAAACGGTCGGACTTGAAAGCTTCGTGGATACTCCATCAAGACAATGCGCGGCC  
TCACACATCGAGCTTAACACGTGAATTTATGAGTAAAAATGGAGTTGAAACAATCCCTCA  
TCCCCCTTATAGCCCTGACTTGGCTCCATGTGATTTTTGGATGTTTCCTGCGCTAAAAAA  
GGAGCTTCGCGGACGAAGATTCGTATCGAAGACAAAAATCCAGAATGCAATTCAAACCTT  
CTTCAACTCCATCCCAGAGGAAGAATTCAGGAAAACAATGTTGGATAAGTGGCAAGAGCG  
CATGAAAAAGTGCATCCGGTTTGATGGACGGTACTTTGAAAAGCAAAAGGAAGTTATGGA  
AGATTTCGGAGGAAAGTGGATACGAATATTAACCTTTTTGAATTCTGGTAAGGGAAAAATCT  
TCCTAAAAACCGTAGGGGTAACTTTCTCACTAATTTCAAATTGTCATAACTCGGTCAA  
TTTTTATTCGATTGAGCTGATCTTGGTTTTAATCGATAGGTATTGAGTTGATCTTTAAA  
TGAGACCAAAATCATGTCTGCATCTATCTTACTTTGAAGTTACAGAACCAGTCCCGGTA  
CTTTTGGGACACCCTACGTA

--

>Btmar2.9.58\_gi-1092455237-gb-MAMS01000094\_1-:3594729-3595710  
gi-1092455237-gb-MAMS01000094.1-:3594729-3595710 Bemisia tabaci isolate MEAM1 Scaffold320,  
whole genome shotgun sequence 982 bp

TACATAAGGTGTCCCAAAGCACCGGGACTTGTTCTGTAACCTCGAAAGTAAGATAGATA  
CAGACATGATCTTGATTTCATTTTAAAGATCAACTCAATACCTATCGATTAAAACCAAGA  
TCAGCTCAATCGGATAAAAATTGACCGAGTTATGGCAATTTGAAATCAGCGAGGAAAGTT  
TACGCCTACGGTTTTTAAGGAAGATTCTTCATCGCCGTAAATCGAAAAGTCGGCCGATAA  
AGTGATGCTTATTGTGTTTTTTATTTTCGAGGTGTCATTTATCAACATTTGTACCATC  
AAACACAACAGTTGACAGTGCGTATTATTGCAAAGTACTAAAGGAGTTGAGAATGCACAT  
TTCCCGGAAACGGTCGGACTTGAAAGCTTCGTGGATACTCCATCAAGACAATGCGCGGCC  
TCACACATCGAGCTTAACACGTGAATTTATGAGTAAAAATGGAGTTGAAACAATCCCTCA  
TCCCCCTTATAGCCCTGACTTGGCTCCATGTGATTTTTGGATGTTTCCTGCGCTTAAAAA  
GGAGCTTCGCGGACGAAGATTCGTATCGAAGACAAAAATCCAGAATGCAATTCAAACCTT  
CTTCAACTCCATCCCAGAGGAAGAATTCAGGAAAACAATGTTGGATAATAGGGGCAAGAG  
CGCATGAAAAAGTGCATCCGGTTTGATGGACGGTACTTTGAAAAGCAAAAGGAAGTTATG  
GAAGATTTCGGAGGAAAGTGGATACGAATATTAACCTTTTTGAATCCTGGTAAGCGAAAAAT  
CTTCCTAAAAACCGTAGGGGTAACTTTCTCACTAATTTCAAATTGTCATAACTCGGTCT  
AATTTTTATTCGATTGAGCTGATCTTGGTTTTAATCGATAGGTATTGAGTTGATCTTTAA

AATGAGACCAAAATCATGTCTGCATCTATCTTACTTTTGAAGTTACAGAACCAGTCCCGG  
TACTTTTGGGACACCCTACGTA

--

>Btmar2.9.59\_gi-1092455237-gb-MAMS01000094\_1-:3753808-3754542  
gi-1092455237-gb-MAMS01000094.1-:3753808-3754542 Bemisia tabaci isolate MEAM1 Scaffold320,  
whole genome shotgun sequence 735 bp

TGCGTTTTGTGTTTTTTATTTTCGAGGTGTCATTTATCAACATTTTGTACCATCAAACA  
CAACAGTTGACAGTGCGTATTATTGCAAAGTACTAAAGGAGTTGAGAATGCACATTTCCC  
GGAAACGGTCGGACTTGAAAGCTTCGTGGATACTCCATCAAGACAATGCGCGGCCTCACA  
CATCGAGCTTAACACGTGAATTTATGAATAAAAAATGGAGTTGAAACAATCCCTCATCCCC  
CTTATAGCGCTGACTTGGCTCCATGTGATTTTTGGATGTTTCCACGCTTAAAAAGGAGC  
TTCGCGGACGAATATTCGTATCGAAGACCGAAATCCAGAATGCAATTCAAAACCTTCTCA  
ACTCCATCCCAGAGGAAGAATTCAGGAAAACAATGTTGGATAAGTGGCAAGAGCGCATGA  
AAAAGTGCATCCGGTTTGATGGACGGTACTTTGAAAAGCAAAAGGAAGTTATGGAAGATT  
CGGAGGAAAAGTGGATACGAATATTAACTTTTTGAATGCTGGTAAGCGAAAAATCTTCCTA  
AAAACCGTAGGGGTAACTTTCCTCACTAATTTCAAATTGTCATAACTCGGTCAATTTTT  
ATTCCATTGAGCTGATCTTGGTTTCAATCGATAGGTATTGAGTTGATCTTTAAATGAGA  
CCAAAATCATGTCTGCATCTATCTTACTTTTGAAGTTACAGAACCAGTCTCGGTACTTTT  
GGGACACCCTACGTA

--

>Btmar2.9.60\_gi-1092425788-gb-MAMS01019750\_1-:2678838-2679817  
gi-1092425788-gb-MAMS01019750.1-:2678838-2679817 Bemisia tabaci isolate MEAM1 Scaffold231,  
whole genome shotgun sequence 980 bp

TACATAAGGTGTCCCAAAGCACCGGGACTTGTTCTGTAACCTCGAAAGTAAGATAGATA  
CAGACATGATCTTGATTTCATTTTAAAGATCAACTCAATACCTATCGATTAACCAAGA  
TCAGCTCAATCGGATAAAAATTGACCGAGTTATGGCAATTTGAAATCAGCGAGGAAAGTT  
TACGCCTACGGTTTTTAAGGAAGATTCTTCATCGCCGTAAATCGAAAAGTCGGCCGATAA  
AGTGATGCTTATTGTGTTTTTTATTTTCGAGGTGTCATTTATCAACATTTTGTACCATC  
AAACACAACAGTTGACAGTGCGTATTATTGCAAAGTACTAAAGGAGTTGAGAATGCACAT  
TTCCCGGAAACGGTCGGACTTGAAAGCTTCGTGGATACTCCATCAAGACAATGCGCGGCC

TCACACATCGAGCTTAACACGTGAATTTATGAGTAAAAATGGAGTTGAAACAATCCCTCA  
TCCCCCTTATAGCCCTGACTTGGCTCCATGTGATTTTTGGATGTTTCCCACGCTTAAAAA  
GGAGCTTCGCGGACGAAGATTCGTATCGAAGACCGAAATCCAGAATGCAATTCAAACCTT  
CTTCAACTCCATCCCAGAGGAAGAATTCAGGAAAACAATGTTGGATAAGTGGCAAGAGCG  
CATGAAAAAGTGATCCGGTTTGATGGACGGTACTTTGAAAAGCAAAAGGAAGTTATGGA  
AGATTCGGAGGAAAGTGGATACGAATATTAACCTTTTTGAATCCTGGTAAGCGAAAAATCT  
TCCTAAAAACCGTAGGGGTAACTTTCCTCACTAATTTCAAATTGTCATAACTCGGTCAA  
TTTTTATTCGATTGAGCTGATCTTGGTTTTAATCGATAGGTATTGAGTTGATCTTTAAAA  
TGAGACCAAAATCATGTCTGTATCTATCTTACTTTGAAGTTACAGAACCAGTCCCGGTA  
CTTTGGGACACCCTACGTA

>Btmar2.9.61\_gi-1092428471-gb-MAMS01017067\_1-:1922201-1923180  
gi-1092428471-gb-MAMS01017067.1-:1922201-1923180 Bemisia tabaci isolate MEAM1 Scaffold811,  
whole genome shotgun sequence 980 bp

TACGTAAGGTGTCCCAAAGCACCGGGACTTGTTCTGTAACCTCGAAAGTAAGATAGATA  
CAGACATGATCTTGATTTCAATTTAAAGATCAACTCAATACCTATCGATTAAAACCAAGA  
TCAGCTCAATCGGATAAAAAATTGACCGAGTTATGGCAATTTGAAATCAGCGAGGAAAGTT  
TACGCCTACGGTTTTTAAGGAAGATTCTTCATCGCCGTAAATCGAAAAGTCGGCCGATAA  
AGTGATGCTTATTGTGTTTTTTATTTTCGAGGTGTCATTTATCAACATTTGTACCATC  
AAACACAACAGTTGACAGTGCGTATTATTGCAAAGTAAAGGAGTTGAGAATGCACAT  
TTCCCGGAAACGGTCGGACTTGAAAGCTTCGTGGATACTCCATCAAGACAATGCGCGGCC  
TCACACATCGAGCTTAACACGTGAATTTATGAGTAAAAATGGAGTTGAAACAATCCCTCA  
TCCCCCTTATAGCCCTGACTTGGCTCCATGTGATTTTTGGATGTTTCTACGCTTAAAAA  
GGAGCTTCGCGGACGAAGATTCGTATCGAAGACCGAAATCCAGAATGCAATTCAAACCTT  
CTTCAACTCCATCCCAGAGGAAGAATTCAGGAAAACAATGTTGGATAAGTGGCAAGAGCG  
CATGAAAAAGTGATCCGGTTTGATGGACGGTACTTTGAAAAGCAAAAGGAAGTTATGGA  
AGATTCGGAGGAAAGTGGATACGAATATTAACCTTTTTGAATCCTGGTAAGCGAAAAATCT  
TCCTAAAAACCGTAGGGGTAACTTTCCTCACTAATTTCAAATTGTCATAACTCGGTCAA  
TTTTTATTCGATTGAGCTGATCTTGGTTTTAATCGATAGGTATTGAGTTGATCTTTAAAA  
TGAGACCAAAATCATGTCTGTATCTATCTTACTTTGAAGTTACAGAACCAGTCCCGGTA  
CTTTGGGACACCCTACGTA

>Btmar2.9.62\_gi-1092428471-gb-MAMS01017067\_1-:2080494-2081476  
gi-1092428471-gb-MAMS01017067.1-:2080494-2081476 Bemisia tabaci isolate MEAM1 Scaffold811,  
whole genome shotgun sequence 983 bp

TACGTAAGGTGCCCCAAAAGTACCGGGACTTGTTCTGTAAGTTCGAAAGTAAGATAGATA  
CAGACATGATCTTGATCTCATTTTAAAGATCAACTCAATACCTATCGATTAAAACCAAGA  
TCAGCTCAATCGGATAAAAATTGACCGAGTTATGGCAATTTGAAATCAGCGAGGAAAAGTT  
TACGCCTACGGTTTTTAAGGAAGATTCTTCATCGCCGTAAATCGAAAAGTCGGCCGATAA  
AGTGATGCTTATTGTGTTTTTTATTTTCGAGGTGTCATTTATCAACATTTTGTACCATC  
AAACACAACAGTTGACAGTGCGTATTATTGCAAAGTACTAAAGGAATTGAGAATGCACAT  
TTCCCGGAAACGGTCGGACTTGAAAGCTTCGTGGATACTCCATCAAGACAATGCGCGGCC  
TCACACATCGAGCTTAACACGTGAATTTATGAGTAAAAATGGAGTTGAAACAATCCCTTA  
TCCCCCTTATAGCCCTGACTTGGCTCCATGTGATTTTTGGATGTTTCCTACGCTTAAAAA  
GGAGCTTCGCGGACGAAGATTCGTATCGAAGACCGAAATCCAGAATGCAATTCAAAACCTT  
CTTCAACTCCATCCCAGAGGAAGAATTCAGGAAAACAATGTTGGATAAGTGGCAAGAGCA  
CATGAAAAAGTGCATCCGGTTTGATGGACGGTTCTTTGAAAAGCAAAAGGAAGTTATGGA  
AGATTCGGAGGAAAGTGGATACAAATATTAACTTTTGAATCCTGGTAAGCGAAAAATCT  
TCCTAAAAACCGTAGGGGTAACTTTCCTCGCGAATTTCAAATTGTCATAACTCGGTCAA  
TTTTTATTCGATTGAGCTGATCTTGGTTTTAATCGATAGGTACCTATTGAGTTGATCTTT  
AAAATGAGACCAAAATCATGCCTGTATCTGTGCTTTTGAAGTCACAGAACCAGTCCCGGT  
ATACTTTTGGGACACCCTACGTA

--

>Btmar2.9.63\_gi-1092428471-gb-MAMS01017067\_1-:1895437-1896175  
gi-1092428471-gb-MAMS01017067.1-:1895437-1896175 Bemisia tabaci isolate MEAM1 Scaffold811,  
whole genome shotgun sequence 739 bp

TGCGTTTTGTGTTTTTTATTTTCGAGGTGTCATTTATCAACATTTTGTACCATCAAACA  
CAACAGTTGACAGTGCGTATTATTGCAAAGTACTAAAGGAGTTGAGAATGCACATTTCCC  
GGAAACGGTCGGACTTGAAAGCTCCGTGGATACTCCATCAAAACAATGCGCAGCCTCACA  
CATCGAGCTTAACACGTGAATTTATGAGTAAAAATGGAGTTGAAACAATCCCTCATCCCC  
CTTATAGCCCTGACTTGGCTCCATGTGATTTTTGGATGTTTCCACGCTTAAAAAGGAGC  
TTCGCGGACGAAGATTCGTAAGTATCGAAGACCGAAATCCAGAATGCAATTCAAAACCTC



TTCAACTCCATCCCAGAGGAAGAATTCAGGAAAACAATGTTGGATAAGTGGCAAGAGCGC  
ATGAAAAAGTGCATCCGGTTTGATGGACGGTACTTTGAAAAGCAAAAGGAAGTTATGGAA  
GATTCGGAGGAAAGTGGATACGAATATTAACTTTTGAATGCTGGTAAGCGAAAAATCTT  
CCTAAAAACCGTAGGGGTAACTTTCCTCACTAATTTCAAATTGCCATAACTCGGTCAAT  
TTTAATCCGATTGAGCTGATCTTGGTTTTAATCGATAGGTATTGAGTTGATCTTTAAAT  
GAGACCAAAATCATGTCTGCATCTATCTTACTTTTGAAGTTACAGAACCAGTCCCGGTAC  
TTTTGGGACACCCTACGTA

--

>Btmar2.9.64\_gi-1092446717-gb-MAMS01003828\_1-:962043-963022  
gi-1092446717-gb-MAMS01003828.1-:962043-963022 Bemisia tabaci isolate MEAM1 Scaffold2363,  
whole genome shotgun sequence 980 bp

TACATAAGGTGTCCAAAAGCACCGGGACTTGTTCTGTAACCTCGAAAGTAAGATAGATA  
CAGACATGATCTTGATTTTCAATTTAAAGATCAACTCAATACCTATCGATTAAAACCAAGA  
TCAGCTCAATCGGATAAAAATTGACCGAGTTATGGCAATTTGAAATCAGCGAGGAAAAGTT  
TACGCCTACGGTTTTTCAGGAAGATTCTTCATCGCCGTAAATCGAAAAGTCGGCCGATAA  
AGTGATGCTTATTGTGTTTTTTATTTTCGAGGTGTCATTTATCAACATTTGTACCATC  
AAACACAACAGTTGACAGTGCGTATTATTGCAAAGTACTAAAGGAGTTGAGAATGCACAT  
TTCCCGGAAACGGTCGGACTTGAAAGCTTCGTGGATACTCCATCAAGACAATGCGCGGCC  
TCACACATCGAGCTTAACACGTGAATTTATAAGTAAAAATGGAGTTGAAACAATCCCTCA  
TCCCCCTTATAGCCCTGACTTGGCTCCATGTGATTTTTGGATGTTTCCTACGCTTAAAAA  
GGAGCTTCGCGGACGAAGATTCGTATCGAAGACCGAAATCCAGAATGCAATTCAAAACCT  
CTTCAACTCCATCCCAGAGGAAGAATTCAGGAAAACAATGTTGGATAAGTGGCAAGAGCG  
CATGAAAAAGTGCATCCGGTTTGATGGACGGTACTTTGAAAAGCGAAAGGAAGTTATGGA  
AGATTCGGAGGAAAGTGGATAGGAATATTAACTTTTTGAATCCTGGTAAGCGAAAAATCT  
TCCTAAAAACCGTAGGGGTAACTTTCCTCACTAATTTCAAATTTTCATAACTCGGTCAA  
TTTTTATTCGATTGAGCTGATCTTGGTTTTAATCGATAGGTATTGAGTTGATCTTTAAAA  
TGAGACCAAAATCATGTCTGCATCTATCTTACTTTTGAAGTTACAGAACCAGTCCCGGTA  
CTTTTGGGACACCCTACGTA

--

>Btmar2.9.65\_gi-1092455056-gb-MAMS01000145\_1-:86036-87015  
gi-1092455056-gb-MAMS01000145.1-:86036-87015 Bemisia tabaci isolate MEAM1 Scaffold471, whole  
genome shotgun sequence 980 bp

TACATAAGGTGTCCCAAAGCACCGGGACTTGTTCTGTAACCTCGAAAGTAAGATAGATA  
CAGACATGATCTTGATTTCAATTTAAAGATCAACTCAATACCTATCGATTAAAACCAAGA  
TCAGCTCAATCGGATAAAAATTGACCGAGTTATGGCAATTTGAAATCAGCGAGGAAAGTT  
TACGCCTACGGTTTTTAAGGAAGATTCTTCATCGCCGTAAATCGAAAAGTCGGTCGATAA  
AGTGATGCTTATTGTGTTTTTTATTTTCGAGGTGTCATTTATCAACATTTTGTACCATC  
AAACACAACAGTTGACAGTGCGTATTATTGCAAAGTACTAAAGGAGTTGAGAATGCACAT  
TTCCCGGAAACGGTCGGACTTGAAAGCTTCGTGGATACTCCATCAAGACAATGCGCGGCC  
TCACACATCGAGCTTAACACGTGAATTTATGAGTAAAAATGGAGTTGAAACAATCCCTCA  
TCCCTCTTATAGTCCTGACTTGGCTCCATGTGATTTTTGGATGTTTCCTGCGCTTAAAAA  
GGAGCTTCGCGGACGAAGATTCGTATCGAAGACAAAAATCCAGAATGCAATTCAAACTT  
CTTCAACTCCATCCCAGAGGAAGAATTCAGGAAAACAATGTTGGATAAGTGGCAAGAGCG  
CATGAAAAAGTGATCCGGTTTGATGGACGGTACTTTGAAAAGCAAAAGGAAGTTATGGA  
AGATTCGGAGGAAAGTGGATACGAATATTAACTTTTTGAATCCTGGTAAGCGAAAAATCT  
TCCTAAAAACCGTAGGGGTAACTTTCCTCACTAATTTCAAATTGTCATAACTCGGTCAA  
TTTTTATTTGATTGAGCTGATCTTGGTTTTAATCGATAGGTATTGAGTTGATCTTTAAAA  
TAAGACCAAATCATGTCTGTATCTATCTTACTTTTGAAGTTACAGAACCAGTCCCGGTA  
CTTTTGGGACACCCTACGTA

--

>Btmar2.9.66\_gi-1092455056-gb-MAMS01000145\_1-:1128996-1129975  
gi-1092455056-gb-MAMS01000145.1-:1128996-1129975 Bemisia tabaci isolate MEAM1 Scaffold471,  
whole genome shotgun sequence 980 bp

TACAAAAGGTGTCCCAAAGCACCGGGACTTGTTCTGTAACCTCAAAAGTAAGATGGATA  
CAGACATGATCTTGATTTCAATTTAAAGATCAACTCAATACCTATCGATTAAAACCAAGA  
TCAGCTCAATCGGATAAAAATTGACCGAGTTATGGCAATTTGAAATCAGCGAGGAAAGTT  
TACGCCTACGGTTTTTAAGGAAGATTCTTCATCGCCGTAAATCGAAAAGTCGGCCTATAA

AGTGATGCTTATTGTGTTTTTTCATTTTCGAGGTGTCATTTATCAACATTTTGTACCAC  
CAAACACAACAGTTGACAGTGCGTATTATTGCAAAGTGCTAAAGGAGTTGAGAATGCACA  
TTCCCGGAAACGGTCGGACTTGAAAGCTTCGTGGATACTCCATCAAGACAAGCGCGGCC  
TCACACATCGAGCTTAACACGTGAATTTATGAGTAAAAATGGAGTTGAAACAATCCCTCA  
TCCCCCTTACAGCCCTGACTTGGCTCCATGTGATTTTTGGATGTTTCCTACACTTAAAAA  
GGAGCTTCGTGGACGAAGATTGGAATCGAAGACCGAAATCCAGAATGCAATTCAAACCTT  
TTTCAACGCCATCCCAGAGAAAGAATTCAGGAAAACAATGTTGGATAAGTGGCAAGAGCG  
CATGAAAAAGTGCATCCGGTTTGATGAACGGTACTTTGAAAAGCAAAAGGAAGTTATGGA  
AGATTCGGAGGAAAGTGGATACGAATATTAACCTTTTTGAATCCTGGTAAGCGAAAAATCT  
TCCTAAAAACCGTAGGGGTAACTTTCCTCACTAATTTCAAATTGTCATAACTCAGTCAA  
TTTTTATTTGATTGAGCTGATCTTGGTTTTAATCGATAGGTATTGAGTTGATCTTCAAAA  
TGAGACCAAATCATGTCTGTATCTATCTTACTTTTGAAGTTACAGAACCAGTCCCGGTA  
CTTTGGGACACCCTACGTA

>Btmar2.9.67\_gi-1092455056-gb-MAMS01000145\_1-:723030-723764

gi-1092455056-gb-MAMS01000145.1-:723030-723764 Bemisia tabaci isolate MEAM1 Scaffold471, whole  
genome shotgun sequence 735 bp

TGCGTTTTGTGTTTTTTTATTTTCGAGGTGTCATTTATCAACATTTTGTACCATCCAACA  
CAACAGTTGACAGTGCGTATTATTGCAAAGTAAAGGAGTTGAGAATGCACATTTCCC  
GGAAACGGTCGGACTTGAAAGCTCCGTGGATACTCCATCAAAACAATGCGCAGCCTCACA  
CATCGAGCTTAACACGTGAATTTATGAGTAAAAATGGAGTTGAAACAATTCCTCATCCCC  
CTTATAGCGCTGACTTGGCTCCATGTGATTTTTGGATGTTTCCACGCTTAAAAAGGAGC  
TTCGCGGACGAAGATTCGTATCGAAGACCGAAATCCAGAATGCAATTCAAAACCTCTTCA  
ACTCCATCCCAGAGGAAGAATTCAGGAAAACAATGTTGGATAAGTGGCAAGAGCGCATGA  
AAAAGTGCATCCGGTTTGATGGACGGTACTTTGAAAAGCAAAAGGAAGTTATGGAAGATT  
CGGAGGAAAGTGGATACGAATATTAACCTTTTTGAATGCTGGTAAGCGAAAAATCTTCCTA  
AAAACCGTAGGGGTAACTTTCCTCACTAATTTCAAATTGCCATAACTCGGTCAATTTTA  
ATCCGATTGAGCTGATCTTGGTTTTAATCGATAGGTATTGAGTTGATCTTTAAATGAGA  
CCAAATGATGTCTGCATCTATCTTACTTTTGAAGTTACAGAACCAGTCCCGGTACTTTT  
GGGACACCCTACGTA

--

>Btmar2.9.68\_gi-1092453068-gb-MAMS01000954\_1-:28201-29180  
gi-1092453068-gb-MAMS01000954.1-:28201-29180 Bemisia tabaci isolate MEAM1 Scaffold1240, whole  
genome shotgun sequence 980 bp

TACATAAGGTGTCCCAAAGCACCGGGACTTGTTCTGTAACCTCGAAAGTAAGATAGATA  
CAGACATGATCTTGATTTTCAATTTAAAGATCAACTCAATACCTATCGATTAAAACCAAGA  
TCAGCTCAATCGGATAAAAATTGACCGAGTTATGGCAATTTGAAATCAGCGAGGAAAAGTT  
TACGCCTACGGTTTTTAAGGAAGATTCTTCATCGCCGTAAATCGAAAAGTCGGCCGATAA  
AGTGATGCTTATTGTGTTTTTTATTTTCGAGGTGTCATTTATCAACATTTTGTACCATC  
AAACACAACATTTGACAGTGCGTATTATTGCAAAGTACTAAAGGAGTTGAGAATGCACAT  
TTCCCGGAAACGGTCGGACTTGAAAGCTTCGTGGATACTCCATCAAGACAATGCGCGGCC  
TCACCCATCGAGCTTAACACGTGAATTTATGAGTAAAAATGGAGTTGAAACAATCCCTCA  
TCCCCCTTATAGCCCTGACTTGGCTCCAAGTGATTTTTGGATGTTTCCTACGCTTAAAAA  
GGAGCTTCGCGGACGAAGATTCGTATCGAAGACGGAAATCCAGAATGCAATTCAAAACCTT  
TTTCAACTCCATCCCAGAGGAAGAATTCAGGAAAACAATGTTGGATAAGTGGAAGAGCG  
CATGAAAAAGTGATCCGGTTTGATGGACGGTACTTTGAAAAGCAAAAGGAAGTTATGGA  
AGATTCGGAGGAAAGTGGATACGAATATTAACCTTTTTGAATCCTGGTAAGCGAAAAATCT  
TCCTAAAAACCGTAGGGGTAACTTTCCTCACTAATTTCAAATTGTCATAACTCGGTCAA  
TTTTTATTCGATTGAGCTGATCTTGGTTTTAATCGATAGGTATTGAGTTGATCTTTAAAA  
TGAGACCAAAATCATGTCTGCATCTATCTTACTTTTGAAGTTACAGAACCAGTCCCGGTA  
CTTTTGGGACACCCTACGTA

--

>Btmar2.9.69\_gi-1092449565-gb-MAMS01002590\_1-:204698-205677  
gi-1092449565-gb-MAMS01002590.1-:204698-205677 Bemisia tabaci isolate MEAM1 Scaffold1870,  
whole genome shotgun sequence 980 bp

TACATAAGGTGTCCCAAAGCACCGGGACTTGTTCTGTAACCTCGAAAGTAAGATAGATA  
CAGACATGATCTTGATCTCAATTTAAACATCAACTCAATACCCATCGATTAAAACCAAAA  
TCAGCTCAATCGGATAAAAATTGACCGAGTTATGGCAATTTGAAATCAGCGAGGAAAAGTT  
TACGCCTACGGTTTTTAAGGAAGATTCTTCATCGCCGTAAATCGAAAAGTCGGCCGATAA  
AGTGATGGTTATTGTGTTTTTTATTTTCGAGGTGTCATTTATCAACATTTTGTACCATC  
AAACACAACAGTTGACAGTGCGTATTATTGCAAAGTACTAAAGGAGTTGAGAATGCACAT

TTCCCGGAAACGGTCGGACTTGAAAGCTTCGTGGATACTCCATCAAGACAATGCGCGGCC  
TCACACATCGAGCTTAACACGTGAATTTATGAGTAAAAATGGAATTGAAACAATCCCTCA  
TCCCCCTTATAGCCCTGACTTGGCTCCATGTGATTTTTGGATGTTTTCTACGCTTAAAAA  
GGAGCTTCGCGGACGAAGATTCGTATCGAAGACAAAAATCCAGAATGCAATTCAAACCTT  
CTTCAACTCCATCCCAGAGGAAGAATTCAGGAAAACAATGTTGGATAAGTGGCAAGAGCG  
CATGAAAAAGTGCATCCGGTTTGATGGACGGTACTTTGAAAAGCAAAAGGAAGTTATGGA  
AGATTTCGGAGGAAAGTGGATACGAATATTAACCTTTTTGAATCCTGGTAAGCGAAAAATCT  
TCCTAAAAACCGTAGGGGTAACTTTCTCACTAATTTCAAATTGTCATAACTCGGTCAA  
TTTTTATTCGATTGAGCTGATCTTGGTTTTAATCGATCGGTATTGAGTTGATCTTCAAAA  
TGAGACCAAAATCATGTCTGTATCTATCTTACTTTTGAAGTTACAGAACCAGTCCCGGTA  
CTTTTGGGACACCCTACGTA

--

>Btmar2.9.70\_gi-1092446696-gb-MAMS01003835\_1-:1269198-1270176  
gi-1092446696-gb-MAMS01003835.1-:1269198-1270176 Bemisia tabaci isolate MEAM1 Scaffold2366,  
whole genome shotgun sequence 979 bp

TACATAAGGTGTCCCAAAGCACCGGGACTTGTTCTGTAACCTCGAAAATAAGATAGATA  
CAGACATGATCTTGATTTTCAATTTAAAGATCAACTCAATACCCATCGATTAAAACCAAAG  
TCAGCTCAATCGGATAAAAATTGACCGAGTTATGGCAATTTGAAATCAGCGAGGAAAGTT  
TACGCCTACGGTTTTTAAGGAGGATTCTTCATCGCCGTAAATCGAAAAGTCGGCCGATAA  
AGTGATGCTTATTGTGTTTTTTATTTTCGAGGTGTCATTTATCAACATTTTGTACCATC  
AAACACAACAGTTGACAGTGCGTATTATTGCAAAGTACTAAAGGAGTTGAGAATGCACAT  
TTCCCGGAAACGGTCGGACTTGAAAGCTTCGTGGATACTCCATCAAGACAATGCGCGGCC  
TCACACATCGAGCTCAACACGTGAATTTATGAGTAAAAATGGAGTTGAAACAATCCCTCA  
TCCCCCTTATAGCCCTGACTTGGCTCCATGTGATTTTTGGATGTTTCCTACGCTTAAAAA  
GGAGCTTCGCGGACGAAGATTCGTATCGAAGACAAAAATCCAGAATGCAATTCAAACCTT  
CTTCAACTCCATCCCAGAGGAAGAATTCAGGAAAACAATGTTGGAGAAGTGGCAAGAGCG  
CATGAAAAAGTGCATCCGGTTTGATGGACGGTACTTTGAAAAGCAAAAGGAAGTTATGGA  
AGATTTCGGAGGAAAGTGGATACGAATATTAACCTTTTTGAATCCTGGTAAGCGAAAAATCT  
TCCTAAAAACCGTAGGGGTAACTTTCTCACTAATTTCAAATTGTCATAACTCGGTCAA  
TTTTTATTCGATTGAGCTGATCTTGGTTTTAATCGATAGGTATTGAGTTGATCTTCAAAA

TGAGACCAAATCATGTCTGTATCTATCTTACTTTGAAGTTACAGAACCAGTCCCGGTA  
CTTTGGGACACCCTACGT

--

>Btmar2.9.71\_gi-1092449032-gb-MAMS01002826\_1:-965196-966175  
gi-1092449032-gb-MAMS01002826.1:-965196-966175 Bemisia tabaci isolate MEAM1 Scaffold1971,  
whole genome shotgun sequence 980 bp

TACGTAAGGTGTCCCAAAGCACCGGGACTTGTTCTGTAAGTTCGAAAGTAAGATAGATA  
CAGACATGATCTTGATTTCAATTTAAAGATCAACTCAATACCTATCGATTAAAACCAAGA  
TCAGCTCAATCGGATAAAAATTGACCGAGTTATGGCAATTTGAAATCAGCGAGGAAAGTT  
TACGCCTACGGTTTTTAAGGAAGATTCTTCATCGCCGTAAATCGAAAAGTCGGCCGATAA  
AGTGATGCTTATTGTGTTTTTTATTTTCGAGGTGTCATTTATCAACATTTTGTACCATC  
AAACACAACAGTTGACAGTGCGTATTATTGCAAAGTAAAGGAGTTGAGAATGCACAT  
TTCCCGGAAACGGTCGGACTTGAAAGCTTCGTGGATACTCCATCAAGACAATGCGCGGCC  
TCACACATCGAGCTTAACACGTGAATTTATGAGTAAAAATGGAGTTGAAACAATCCCTCA  
TCCCCCTAATAGCGCTGACTTGGCTCCATGTGATTTTTGGATGTTTCCACGCTTAAAAA  
GGAGCTTCGCGGACGAAGATTCGTATCGAAGACCGAAATCCAGAATGCAATTCAAACCTT  
CTTCAACTCCATCCCAGAGGAAGAATTCAGGAAAACAATGTTGGATAAGTGGCAAGAGCG  
CATGAAAAAGTGCATCCGGTTTGATGGACGGTACTTTGAAAAGCAAAAGGAAATTATGGA  
AGATTCGGAGGAAAGTGGATACGAATATTAACTTTTGAATCCTGGTAAGCGAAAAATCT  
TCCTAAAAACCGTAGGGGTAACTTTCTCACTAATTTCAAATTGTCATAACTCGGTCAA  
TTTTTATTCGATTGAGCTGATCTTGGTTTTAATCGACAGGTATTGAGTTGATCTTTAAAA  
TGAGACCAAATCATGTCTGCATCTATCTTACTTTGAAGTTACAGAACCAGTCCCGGTA  
CTTTGGGACACCCTACGTA

>Btmar2.9.72\_gi-1092455142-gb-MAMS01000117\_1:-3218591-3219570  
gi-1092455142-gb-MAMS01000117.1:-3218591-3219570 Bemisia tabaci isolate MEAM1 Scaffold382,  
whole genome shotgun sequence 980 bp

TACATAAAGTGTCCCAAAGCACCGGGACTTGTTCTGTAAGTTCAAAAGTAAGATAGATA  
CAGACATAATCTTGATCTCATTTATAGATCAACTCAATACCTATCGATTAAAACCAAGA  
TCAGCTCAATCGAATAAAAATTGACCGAGTTATGGCAATTTAAAATCAGCGAGTAAAGTT

TACGCCTACGGTTTTTAAGGAAGATTCTTCATCGCCGTAAATCGAAAAGTCGGCCGATAA  
AGTGATGCTTATTGTGTTTTTTATTTTCGAGGTGTCATTTATCAACATTTTGTACCATC  
AAACACAACAGTTGACAGTGCGTATTATTGCAAAGTAAAGGAGTTGAGAATGCACAT  
TTCCCGGAAACGGTCGGACTTGAAAGCTTCGTGGATACTCCATCAAGACAATGCGCGGCC  
TCACACATCGAGCTTAACCCGTGAATTTATGAGTAAAAATGGAGTTGAAACAATCCCTCA  
TCCCCCTTATAGCCCTGACTTGGCTCCATGTGATTTTTGGATGTTTCCTGCGCTTAAAAA  
GGAGCTTCGCGGACGAAGATTCGTATCGAAGACAAAAATCCAGAATGCAATTCAAAACCT  
CTTCAACTCCATCCCAGAGGAAGAATTCAGGAAAACAATGTTGGATAAGTGGAAGAGCG  
CATGAAAAAGTGCATCCGGTTTGATGGACGGTACTTTGAAAAGCAAAAGGAAGTTATGGA  
AGATTCGGAGGAAAGTGGATACGAATATTAACCTTTTTGAATCCTGGTAAGCGAAAAATCT  
TCCTAAAAACCGTAGGGGTAACTTTCCTCACTAATTTCAAATTGTCATAACTCGGTCAA  
TTTTTATTGATTGAGCTGATCTTGGTTTTAATCGATAGGTATTGAGTTGATCTTTAAAA  
TGAGACCAAAATCATGTCTGCATCTATCTTACTTTTGAAGTTACAGAACCAGTCCCGGTA  
CTTTTGGGACACCCTACGTA

--

>Btmar2.9.73\_gi-1092448125-gb-MAMS01003211\_1-:565120-566099  
gi-1092448125-gb-MAMS01003211.1-:565120-566099 Bemisia tabaci isolate MEAM1 Scaffold2124,  
whole genome shotgun sequence 980 bp

TACATAAGGTGTCCCAAAGCACCGGGACTTGTTCTGTAACCTCGAAAGTAAGATAGATA  
CAGACATGATCTTGATCTCATTTTAAAGATCAACTCAATACCTATCGATTAAAATCAAGA  
TCAGCTCAATCGGATAAAATTGACCGAGTTATGGCAATTTGAAATCAGCGAGGAAAGTT  
TACGCCTACGGTTTTTAAGGAAGATTCTTCATCGCCGTAAATAGAAAAGTCGGCCGATAA  
AGTGATGCTTATTGTGTTTTTTATTTTCGAGGTGTCATTTATCAACATTTTGTACCATC  
AAACACAACAGTTGACAGTGCGTATTATTGCAAAGTAAAGGAGTTGAGAATGCACAT  
TTCCCGGAAACGGTCGGACTTAAAAGCTTCGTGGATACTCCATCAAGACAATGCGCGGCC  
TCACACATCGAGCTTAACACGTGAATTTATGAGTAAAAATGGAGTTGAAACAATCCCTCA  
TCCCCCTTATAGCCGTGACTTGGCTCCATGTGATTTTTGGATGTTTCCTACGCTTAAAAA  
GGAGCTTCGCGGACGAAGATTCGTATCGAAGACGGAAATCCAGAATGCAATTCAAAACCT  
CTTCAACTCCATCCCAGAGGAAGAATTCAGGAAAACAATGTTGGATAAGTGGAAGAGCG

CATGAAAAAGTGCATCCGGTTTGATGGACGGTACTTTGAAAAGCAAAAGGTAGTTATGGA  
AGATTTCGGAGGAAAAGTGGATACGAATATTAACCTTTTTGAATCCTGGTAAGCGAAAAATCT  
TCCTAAAAACCGTAGGGGTAACTTTCTCACTAATTTCAAATTGTCATAACTCGGTCAA  
TTTTTATTCGATTGAGGTGATCTTGGTTTTAATCGATAGGTATTGAGTTGATCTTTAAAA  
TGAAACCAAAATCATGTCTGTATCTATCTTACTTTTGAAGTTACAGAACCAGTCCCGGTA  
CTTTGGGACACCCTACGTA

>Btmar2.9.74\_gi-1092448125-gb-MAMS01003211\_1:-594766-595747  
gi-1092448125-gb-MAMS01003211.1:-594766-595747 Bemisia tabaci isolate MEAM1 Scaffold2124,  
whole genome shotgun sequence 982 bp

TACATAAAGTGTCCCAAAGTACCGGGACTGGTTCTGTAACCTCGAAAGTAAGATAGATA  
CAGACATGATCTTGATCTCATTTTAAAGATTAACCTCAATACCTATATCGATTAAAACCAA  
GATCGGCTCAATCGAATAAAAAATTGACCGAGTTATGGCAATTTGAAATCAGCGAGGAGAG  
TTTACCCCTACGGTTTTTAAGGAAGATTCTTCATCGCCGTAAATCGAAAAGTCGGCCGAT  
AAAGTGATGCTTATTGTGTTTTTTATTTTCGAGGTGTCATTTATCAACATTTGTACCA  
CCAAACACAACAGTTGACAGTGCGTATTATTGCAAAGTGCTAAAGGAGTTAAGAATGCAC  
ATTTCCCGGAAACGGTCGGACTTGAAAGCTTCGTGGATACTTCATCAAGACAATGCGCGG  
CCTCACACATCGAGCTTAACACGTGAATTTATGAGTAAAAATGGAGTTGAAACAATCCCT  
CATCCCCCTTACAGCCCTGACTTGGCTCTATATGATTTTTGGATGTTTCCTACGCTTAA  
AAGGAGCTTCGCGGACGAAGATTGAATCGAAGACCGAAATCCAGAATGCAATTCAAAAC  
TTTTTCAACGCCATCCCAGAGGAAGAATTAAGGAAAACAATGTTGGATAAGTGGCAAGAG  
CGCATGAAAAAGTGCATCCGGTTTGATGGACGGTACTTTGAAAAGCAAAAGGAAGTTATG  
GAAGATTCGGAGGAAAAGTGGATACGAATATTAACCTTTTTGAATCCTGGTAAGCGAAAAAT  
CTTCCTAAAAACCGTAGGGGTAACTTTCTCACTAATTTCAAATTGTCATAACTCGGTC  
AATTTTTATCCGATTGGGCTGATCTTGGTTTTAATCGATAGGTATTGAGTTGATCTTTAA  
AATGAGACCAAAATCATGTCTGTATCTATCTTACTTTTGAAGTTACAGAACCAGTCCCGG  
TACTTTTGGGACACCCTATGTA

--

>Btmar2.9.75\_gi-1092455177-gb-MAMS01000108\_1:-1359362-1360342  
gi-1092455177-gb-MAMS01000108.1:-1359362-1360342 Bemisia tabaci isolate MEAM1 Scaffold355,  
whole genome shotgun sequence 981 bp



TACATAAGGTGTCCCAAAGCACCGGGACTTGTTCTGTAACCTCGAAAGTAAGATAAATA  
CAGACATGATCTTGATCTCATTTTAAAGATCAACTCAATACCTATCGATTAACCAAGA  
TCAGCTCAATCGAATCAAAATTGACCGAGTTATGGCAATTTGAAATCAGCGAGGAAAGTT  
TACGCCTACGGTTTTTAAGGAAGATTCTTCATCGCCGTAAATCGAAAAGTCGGCCGATAA  
AGTGATGCTTATTGTGTTTTTTATTTTCGAGGTGTCATTTATCAACATTTGTACCATC  
AAACACAACAGTTGACAGTGCGTATTATTGCAAAGTAAAGGAGTTGAGAATGCACAT  
TTCCCGGAAACGGTCGGACTTGAAAGCTTCGTGGATACTCCATCAAGTCAATGCGCGGCC  
TCACACATCGAGCTTAACACGTGAATTTATGAGTAAAAATGGAGTTGAAACAATCCCTCA  
TCCCCCTTATAGCCCTGACTTGGCTCCATGTGATTTTGGATGTTTCCTGCGCTTAAAAA  
GGAGCTTCGCGGACGAAGATTCGTATCGAAGACAAAAATCCAGAATGCAATTCAAACTT  
CTTCAACTCCATCCCAGAGGAAGAATTCAGGAAAACAATGTTAGATACGTGGCAAGAGCG  
CATGAAAAAGTGCAATTCGGTTTGATGGACGATACTTTGAAAAGCAAAAGGAAGTTATGGA  
AGATTCGGAGGAAAGTGGATACGAATATTAACTTTTTGAATCCTGGTAAGCGAAAAATCT  
TCCTTAAAAACCGTAGGGGTAACTTTCCTCACTAATTTCAAATTGTCATAACTCGGTCA  
ATTTTTATTCGATTGAGCTGATCTTGTTTAAATCGATAGGTATTGAGTTGATCTTTAA  
ATGAGACCAAAATCATGTCTGCATCTATCTTACTTTGAAGTTACAGAACCAGTCCCGGT  
ACTTTTGGGACACCCTACGTA

>Btmar2.9.76\_gi-1092455215-gb-MAMS01000097\_1-:2613551-2614531  
gi-1092455215-gb-MAMS01000097.1-:2613551-2614531 Bemisia tabaci isolate MEAM1 Scaffold325,  
whole genome shotgun sequence 981 bp

TACATAAGGTGTCCCAAAGCACCGGGACTTGTTCTGTAACCTCAAAGTAAGATAGATA  
CAGACATGATCTTGATTTTCAATTTAAAGATCAACTCAATACCTATCGATTAACCATGA  
TCAGCTCAATCGAATAAAAATTGACCGAGTTATGGCAATTTGAAATCAGCGAGGAAAGTT  
TACGCCTACGGTTTTTAAGGAAGATTCTTCATCGCCGTAAATCGAAAAGTCGGCCGATAA  
AGTGATGCTTATTGTGTTTTTTATTTTCGAGGTGTCATTTATCAACATGTTGTACCATC  
AAACACAACAGTTGACAGTGCGTATTATTGCAAAGTAAAGGAGTTGAGAATGCACAT  
TTCCCGGAAACGGTCGGACTTGAAAGCTTCGTGGATACTCCATCAAGTCAATGCGCGGCC  
TCACACATCGAGCTTAACACGTGAATTTATGAGTAAAAATGGAGTTGAAACAATCCCTCA  
TCCCCCTTATAGCCCTGACTTGGCTCCATGTGATTTTGGATGTTTCCTGCGCTTAAAAA  
GGAGCTTCGCGGACGAAGATTCGTATCGAAGACAAAAATCCAGAATGCAATTCAAACTT

CTTCAACTCCATCCCAGAGGAAGAATTGAGGAAAACAATGTTAGATACGTGGCAAGAGCG  
CATGAAAAAGTGCATTCGGTTTGATGGACGGTACTTTGAAAAGCAAAAGGAAGTTATGGA  
AGATTCGGAGGAAAGTGGATACGAATATTAACCTTTTTGAATCCTGGTAAGCGAAAAATCT  
TCCTTAAAAACCGTAGGGGTAACTTTCTCACTAATTTCAAATTGTCATAACTCGGTCA  
ATTTTTATTGATTGAGCTGATCTTGATTTTAATCGATAGGTATTGAGTTGATCTTTAAA  
ATGAGACCAAAATCATGTCTGCATCTATCTTACTTTTGAAGTTACAGAACCAGTCCCGGT  
ACTTTTGGGACACCCTACGTA

--

>Btmar2.9.77\_gi-1092455215-gb-MAMS01000097\_1-:4844758-4845737  
gi-1092455215-gb-MAMS01000097.1-:4844758-4845737 Bemisia tabaci isolate MEAM1 Scaffold325,  
whole genome shotgun sequence 980 bp

TACGTAAGGTGTCCCAAAGCACCGGGACTTGTTCTGTAACCTCGAAAGTAAGATAGATA  
CAGACATGATCTTGATTTTCAATTTAAAGATCAACTCAATACCTATCGATTAAAACCAAGA  
TCAGCTCAATCGGATAAAAATTGACCGAGTTATGGCAATTTGAAATCAGCGAGGAAAAGTT  
TACGCCTACGGTTTTTAAGGAAGATTCTTCATCGCCGTAAATCGAAAAGTCGGCCGATAA  
AGTGATGCTTATTGTGTTTTTTATTTTCGAGGTGTCATTTATCAACATTTTGTACCATC  
AAACACAACAGTTGACAGTGCGTATTATTGCAAAGTACCGAAGGAGTTGAGAATGCACAT  
TTCCCGGAAACGGTCGGACTCGAAAGCTTCGTGGATACTCCATCAAGACAATGCGCGGCC  
TCACACATCGAGCTTAACACGTGAATTTATGAGTAAAAATGGAGTTGAAACAATCCCTCA  
TCCCCCTAATAGCGCTGACTTGGCTCCATGTGATTTTTGGATGTTTCCACGCTTAAAAA  
GGAGCTTCGCGGACGAAGATTCGTATCGAAGACCGAAATCCAGAATGCAATTCAAACCTT  
CTTCAACTCCATCCCAGAGGAAGAATTGAGGAAAACAATGTTGGATAAGTGGCAAGAGCG  
CATGAAAAAGTGCATCCGGTTTGATGGACGGTACTTTGAAAAGCAAAAGGAAATTATGGA  
AGATTCGAAGGAAAGTGGATACGAATATTAACCTTTTTGAATCCTGGTAAGCGAAAAATCT  
TCCTAAAAACCGTAAGGGTAACTTTCTCACTAATTTCAAATTGTCATAACTCGGTCAA  
TTTTTATTGATTGAGCTGATCTTGATTTTAATCGATAGGTATTGAGTTGATCTTTAAAA  
TGAGACCAAAATCATGTCTGCATCTATCTTACTTTTGAAGTTACAGAACCAGTCCCGGTA  
CTTTTGGGACACCCTACGTA

>Btmar2.9.78\_gi-1092445037-gb-MAMS01004535\_1-:246867-247494  
gi-1092445037-gb-MAMS01004535.1-:246867-247494 Bemisia tabaci isolate MEAM1 Scaffold2663,  
whole genome shotgun sequence 628 bp

TACATAGGGTGTCCCAAAAATACCGAGACTGGTTCTGTAACCTCGAAACTAAGATAGATA  
CAGGCATGATCTTGGTTTCATTTTATAAAGATCAACTTAATACCTATCGATTAAGACCAA  
GATCAGCTCAATCGAATGAAAATTGACCGAGTCTTGGCAATTTGAAATCAGTGAGGAAAG  
TTTACCCCTACGGTTTTTAAGGAAGATTCTTCATCGCCGCAAATCGAAAAATCGGCCTGT  
AATGTGATGCTTATGGTGTTTTTTTTATTTTCAAGGTGTCATTTATCAACATTTGTACCA  
CCAAACACAACAGTTGACAGTGTGTAATTTTGCAAAGTGCTACAGGAGTTGAGAATGCAC  
ATCTTCCGGAACGGCTGGACTTGAAAGCTTCGTGGATACTCCTTAAAGACAATGCGCAG  
CCTCACACATCGAACTTAACACGTGAATTTATGAGTAAAAATGCAGTTGAAACAATCCCT  
CATCCCCCTTGTAGCCCTGACTTGGCTCCATGTCATGTGATTTTTGGATGTTTGCAGCCC  
TTAAAAAGGAGCTTCGCGGACGAAGATTCGAATCGAAGACCGAAATCCAGAATGCAGTTT  
AAAAATTTTTCAACGCCATCCCAGAGGA

--

>Btmar2.9.79\_gi-1092432837-gb-MAMS01012701\_1-:395607-396587  
gi-1092432837-gb-MAMS01012701.1-:395607-396587 Bemisia tabaci isolate MEAM1 Scaffold6154,  
whole genome shotgun sequence 981 bp

TACATAAGGTGTCCAAAAGCACCGGGACTTGTTCTGTAACCTTGAAAGTAAGATAGATA  
CAGACATGATCTTGATCTCATTTTAAAGATCAACTCAATACCTATCGATTAACCAAGA  
TCAGCTCAATCGGATAAAAATTGACCGAGTTATGGCAATTTGAAATCAGCGAGGAAAGTT  
TACGCCTACGGTTTTTAAGGAAGATTCTTCATCGCCGTAAATCGAAAAGTCGGCCGATAA  
AGTGATGCTTATTGTGTTTTTTTTATTTTCGAGGTGTCATTATTAACATTTGTACCATC  
AAACACAACAGTTGACAGTGCGTATTATTGCAAAGTACTAAAGGAGTTGAGAATGCACAT  
TTCCCGGAACGGTCGGACTTGAAAGCTTCGTGGATACTCCATCAAGACAATGCGCGGCC  
TCACACATCGAGCTTAACACGTGAATTTATGAGTAAAAATGGAGTTGAAACAATCCCTCA  
TCCCTCTTATAGCGTGACTTGGCTCCATGTGATTTTTAGATGTTTCCACGCTTAAAAA  
GGAGCTTCGCGGACGAAGATTCGTATCGAAGACCGAAATCCAGAATGCAATTCAAAACCTT  
CTTCAACTCCATCCCAGAGGAAGAATTCAGGAAAACAATGTTGGATAAGTGGCAAGAGCG  
CATGAAAAAGTGATCCGGTTTGATGGACGGTACTTTGAAAAGCAAAAGGAAGTTATGGA

AGATTCGGAGGAAAGTGGATACAAATATTAACCTTTTTGAATCCTGGTAAGCGAAAAATCT  
TCCTAAAAACCGTAGGGGTAACTTTCTCTACTAATTTCAAATTGTCATAACTCGGTCAA  
TTTTTATTGATTGAGCTGATCTTGGTTTTAATCGATACTGTATTGAGTTGATCTTTAAA  
ATGAGATCAAAATCATGTCTGCATCTATCTTACTTTTGAAGTTACAGAACCAGTCCCGGT  
ACTTTTGGGACACCCTACGTA

--

>Btmar2.9.80\_gi-1092431468-gb-MAMS01014070\_1-:84502-85454  
gi-1092431468-gb-MAMS01014070.1-:84502-85454 Bemisia tabaci isolate MEAM1 Scaffold6761, whole  
genome shotgun sequence 953 bp

ACTTGTTCTGTAACCTCGAAAGTAAGATAGATCCAGACATGATCTTGATCTCATTTTAAA  
GATCAACTCAATACCCATCGATTAAAACCAAGATCAGCTCAATCGGATAAAAATTGACCG  
AGTTATGGCAATTTGAAATCAGCGAGGAAAGTTTACGCCTACGGTTTTTAAGGAAGATTC  
TTCATCGCCGTAAATCGAAAAGTCGGCCGATAAAGTGATGCTTATTGTGTTTTTTTATT  
TCGAGGTGTCATTTATCAACATTTTGTACCATCAAACACAACAGTTGACAGTGCGTATTA  
TTGCAAAGTACTAAAGGAGTTGAGAATGCACATTTCCCGGAAACGGTCGGACTTGAAAGC  
TTCGTGGATACTCCATCAAGACAATGCGCGGCCTCACACATCGAGCTTAACACGTGAATT  
TATGAGTAAAAATGGAGTTGAAACAATCCCTCATCCCCCTTATAGCCCTGACTTGGCTCC  
ATGTGATTTTTGGACGTTTCTACGCTTAAAAAGGAGCTTCGCGGACGAAGATTCGTATC  
GAAGACCGAAATCCAGAATGCAATTCAAACCTTTTTCAACTCCATCCCAGAGGAAGAATT  
CAGGAAAACAATGTTGGATAAGTGGCAAGAGCGCATGAAAAAGTGCATCCGGTTTGATGG  
ACGGTACTTTGAAAAGCAAAAGGAAGTTATGGAAGATTCGGAGGAAAGTGGATACGAATA  
TTAACTTTTTGAATCCTGGTAAGCGAAAAATCTTCCTAAAAACCGTAGGGGTAACTTTC  
CTCACTAATTTCAAATTGTCATAACTCGGTCAATTTTTATTGATTGAGCTGATCTTGGT  
TTTAATCGATAGGTATTGAGTTGATCTTTAAAATGAGACCAAAATCATGTCTGTATCTAT  
CTTACTTTTGAAGTTACAGAACCAATCCCGGTACTTTTGGGACACCCTACGTA

--

>Btmar2.9.81\_gi-1092445095-gb-MAMS01004506\_1-:36987-37939  
gi-1092445095-gb-MAMS01004506.1-:36987-37939 Bemisia tabaci isolate MEAM1 Scaffold2651, whole  
genome shotgun sequence 953 bp

ACTTGTTCTGTAACCTCGAAAGTAAGATAGATACAAACATGATCTTGATCTCATTTTAAA

GATCAACTCAATACCCATCGATTAACCAAGATCAGCTCAATCGGATAAAAATTGACCG  
AGTTATGGCAATTTGAAATCAGCGAGGAAAGTTTACGCCTACGGTTTTTAAGGAAGATTC  
TTCATCGCCGTAAATCGAAAAGTCGGCCGATAAAGTGATGCTTATTGTGTTTTTTTATT  
TCGAGGTGTCATTTATCAACATTTTGTACCATCAAACACAACAGTTGACAGTGCGTATTA  
TTGCAAAGTACTAAAGGAGTTGAGAATGCACATTTCCCGGAAACGGTCGGACTTGAAAGC  
TTCGTGGATACTCCATCAAGACAATGCGCGGCCTCACACATCGAGCTTAACACGTGAATT  
TATGAGTAAAAATGGAGTTGAAACAATCCCTCATCCCCCTTATAGCCCTGACTTGGCTCC  
ATGTGATTTTTGGATGTTTCCTACGCTTAAAAAGGAGCTTCGCGGACGAAGATTCGTATC  
GAAGACCGAAATCCAGAATGCAATTCAAACTTTTTCAACTCCATCCCAGAGGAAGAATT  
CAGGAAAACAATGTTGGATAAGTGGCAAGAGCGCATGAAAAAGTGCATCCGGTTTGATGG  
ACGGTACTTTGAAAAGCAAAAGGAAGTTATGGAAGATTCGGAGGAAAGTGGATACGAATA  
TTTACTTTTTGAATCCTGGTAAGCGAAAAATCTTCCTAAAAACCGTAGGGGTAACTTTC  
CTCACTAATTTTAAATTGTCATAACTCGGTCAATTTTTATTCGATTGAGCTGATCTTGGT  
TTAATCGATAGGTATTGAGTTGATCTTTAAATGAGACCAAAATGATGTCTGTATCTAT  
CTTACTTTTGAAGTTACAGAACCAGTCCCGGTACTTTTGGGACACCCTACGTA

--

>Btmar2.9.82\_gi-1092454059-gb-MAMS01000515\_1-:114338-115317  
gi-1092454059-gb-MAMS01000515.1-:114338-115317 Bemisia tabaci isolate MEAM1 Scaffold1098,  
whole genome shotgun sequence 980 bp

TACAAAAGGTGTCCCAAAAGCACCGGGACTTGTTCTGTAACCTCAAAAGTAAGATGGATA  
CAGACATGATCTTGATTTAATTTTAAAGATCAACTCAATACCTATCGATTAACCAATA  
TCAGCTCAATCGGATAAAAATTGACCAAGTTATGGCAATTTGAAATCAGCGAGGAAAGTT  
TACGCCTACGGTTTTTAAGGAAGATTCTTCATCGCCGTAAATCGAAAAGTCGGCCTATAA  
AGTGATGCTTATTGTGTTTTTTTCATTTTCGAGGTGTCATTTATCAACATTTTGTACCAC  
CAAACACAACAGTTGACAGTGCGTATTATTGCAAAGTGCTAAAGGAGTTGAGAATGCACA  
TTCCCGGAAACGGTCGGACTTGAAAGCTTCGTGGATACTCCATCAAGACAAGCGCGGCC  
TCACACATCGAGCTTAACACGTGAATTTATGAGTAAAAATGGAGTTGAAACAATCCCTCA  
TCCCCCTTACAGCCCTGACTTGGCTCCATGTGATTTTTGGATGTTTCCTACACTTAAAAA  
GGAGCTTCGTGGACGAAGATTCGAATCGAAGACCGAAATCCAGAATGCAATTCAAACTT  
TTTCAACGCCATCCCAGAGGAAGAATTCAGGAAAACAATGTTGGATAAGTGGCAAGAGCG

CATGAAAAAGTGCATCCGGTTTGATGGACGGTACTTTGAAAAGCAAAAGGAAGTTATGGA  
AGATTCGGAGGAAAGTGGATACGAATATTAACCTTTTTGAATCCTGGTAAGCGAAAAATCT  
TCCTAAAAACCGTAGGGGTAACTTTCCTCACTAATTTCAAATTGTCATAACTCGGTCAA  
TTTTTATTCGATTGAGCTGGTCTTGGTTTTAATCGATAGGTATTGAGTTGATCTTTAAAA  
TGAGACCAACATCATGTCTGTATCTATCTTACTTTTGAAGTTACAGAACCAGTCCCGGTA  
CTTTGGGACACCCTACGTA

>Btmar2.9.83\_gi-1092454801-gb-MAMS01000208\_1-:717122-718101

gi-1092454801-gb-MAMS01000208.1-:717122-718101 Bemisia tabaci isolate MEAM1 Scaffold649, whole  
genome shotgun sequence 980 bp

TACAAAAGGTGTCCCAAAGCACCGGGACTTGTTCTGTAACCTCGAAAGTAAGATGGATA  
CAGACATGATCTTGATTTCATTTTAAAGATCAACTCAATACCTATCGATTTAAACCAAGA  
TCAGCTCAATCGGATAAAAATTGACCAAGTTATGGCAATTTGAAATCAGCGAGGAAAAGTT  
TACGCCTACGGTTTTTAAGGAAGATTCTTCATCGCCGTAAATCGAAAAGTCGGCCTATAA  
AGTGATGCTTATTGTGTTTTTTTCATTTTTGAGGTGTCATTTATCAACATTTTGTACCAC  
CAAACACAACAGTTGACAGTGCGTATTATTGCAAAGTGCTAAAGGAGTTGAGAATGCACA  
TTCCCGGAAACGGTCGGACTTGAAAGCTTCGTGGATACTCTATCAAGACAAGCGCGGCC  
TCACACATCGAGCTTAACACGTGAATTTATGAGTAAAAATGGAGTTGAAACAATCCCTCA  
TCCCCCTTACAGCCCTGACTTGGCTCCATGTGATTTTTGGATGTTTCCTACACTTAAAAA  
GGAGCTTCGTGGACGAAGATTGGAATCGAAGACCGAAATCCAGAATGCAATTCAAACCTT  
TTTCAACGCCATCCCAGAGGAAGAATTCAGGAAAACAATGTTGGATAAGTGGCAAGAGCG  
CATGAAAAAGTGCATCCGGTTTGATGGACGGTACTTTGAAAAGCAAAAGGAAGTTATGGA  
AGATTCGGAGGAAAGTGGATACGAATATTAACCTTTTTGAATCCTGGTAAGCGAAAAATCT  
TCCTAAAAACCGTAGGGGTAACTTTCCTTACTAATTTCAAATTGTCATAACTCGGTCAA  
TTTTTATTCGATTGAGCTGATCTTGGTTTTAATCGATAGGTATTGAGTTGATCTTTAAAA  
TGAGACCAAAATCATGTCTGTATCTATCTTACTTTTGAAGTTACAGAACCAGTCCCGGTA  
CTTTGGGACACCCGACGTA

--

>Btmar2.9.84\_gi-1092433774-gb-MAMS01011764\_1-:22903-23882

gi-1092433774-gb-MAMS01011764.1-:22903-23882 Bemisia tabaci isolate MEAM1 Scaffold5743, whole genome shotgun sequence 980 bp

TACATATGGTGTCCCAAAGTACCGGGACTGGTTCTGTAACCTCGAAAGTAAGATAGATA  
CAGACATGATCTTGATTTTCAATTTAAAGATCAACTCAATACCTATCGATTAAAACCAAGA  
TCAGCTCAATCGGATAAAAATTGACCAAGTTATGGCAATTTGAAATCAGCGAGGAAAAGTT  
TACCCCTACGGTTTTTAAGGAAGATTCTTCATCGCCGTAAATCGAAAAGTCGGCCTATAA  
AGTGATACTTATTGTGTTTTTTATTTTCGAGGTGTCATTTATCAACATTTTGTACCACC  
AAACACAACAGTTGACAGTGCGTATTATTGCAAAGTGCTAAAGGAGTTGAGAATGCACAT  
TTCCCGGAAACGGTCGGACTTGAAAGCTTCGTGGATACTCCATCAAGACAATGCGCGGCC  
TCACACATCGAGCTTAACACGTGAATTTATGAGTAAAAATGGAGTTGAAATAATCCCTCA  
TCCCCCTTATAGCCCTGACTTGGCTTTATGTGATTTTTGGATGTTTCCTACGCTTAAAAA  
GGAGCTTCGCGGACGAAGATTGGAATCGAAGACCGAAATCCAGAATGCAATTCAAACCTT  
TTTCAACGCCATCCCAGAGGAAGAATTCAGGAAAATAATGTTGGATAAGTGGAAGAGCG  
CATGAAAAAGTGATCCGGTTTGATGGACGGTACTTTGAAAAGCAAAAGGAAGTTATGGA  
AGATTCGGAGGAAAGTGGATACGAATATTAACCTTTTTGAATCCTGGTAAGCGAAAAATCT  
TCCTATTAACCGTAGGGGTAACTTACCTACTAATTTCAAATTGTCATAACTCGGTCAA  
TTTTTATTCGATTGAGCTGATCTTGGTTTTAATCGATAGGTATTGAGTTGATCTTTAAAA  
TGAGACCAAATCATGTCTGTATCTATCTTACTTTTGAAGTTACAGAACCAGTCCCGGTA  
CTTTTGGGACACCCTACGTA

>Btmar2.9.85\_gi-1092436496-gb-MAMS01009042\_1-:10-960

gi-1092436496-gb-MAMS01009042.1-:10-960 Bemisia tabaci isolate MEAM1 Scaffold45618, whole genome shotgun sequence 951 bp

ACTTGTTCTGTAACCTCGAAAGTAAGATAGATACAGACATGATCTTGATTACATTTTAAA  
GATCAACTCAATACCTATCGATTAAAACCAAGATCAGCTCAATCGGATAAAAATTGACCG  
AGTTATGGCAATTTGAAATCAGCGAGGAAAGTTACGCCTACGGTTTTTAAGGAAGACTC  
TTCATCGCCGTAAATCGAAAAGTCGGCCGATAAAGTGATGCTTATTGTGTTTTTTTATTT  
TCGAGGTGTCATTTATCAACATTTTGTACCATCAAACACAACAGTTGACAGTGCGTATTA  
TTGCAAAGTACTAAAGGAGTTGAGAATGCACATTTCCCGGAAACGGTCGGACTTGAAAGC  
TTCGTGGATACTCCATCAAGACAATGCGCGGCCTCACACATCGAGCTTAACACGTAAATT

TATGAGTAAAAATGGAGTTGAAACAATCCCTCATCCCCCTTATAGCCCTGACTTGGCTCC  
AAGTGATTTTTGGATGTTTCCTACCCTTAAAAAGGAGCTTCGCGGACGAAGATTCGTATC  
GAAGACCGAAATCCAGAATGCAATTCAAAACCTTTTCAACTCCATCCAAGAGGAAGAATT  
CAGGAAAATAATGTTGGATAAGTGGCAAGAGCGCATGAAAAAGTGCATCCGGTTTGATGG  
ACGGTACTTTGAAAAGCAAAAGGAAGTTATGGAAGATTCGGAGGAAAGTGGATACGAATA  
TTTACTTTTTGAATCCTGGTAAGCGAAAAATCTTCCTAAAAACCGTAGGGGTAACTTTC  
CTCACTAATTTCAAATTGTCATAAGTCGGTCAATTTTTATTGATTGAGCTGATCTTGGT  
TTAATCGATAGGTATTGAGTTGATCTTTAAATGAGACCAAAATCATGTCTGTATCTAT  
CTTACTTTTGAAGTTACAGAACCAGTCCCGGTACTTTTGGGACACCCTACG

--

>Btmar2.9.86\_gi-1092437566-gb-MAMS01008150\_1-:566212-567191  
gi-1092437566-gb-MAMS01008150.1-:566212-567191 Bemisia tabaci isolate MEAM1 Scaffold4159,  
whole genome shotgun sequence 980 bp

TACAAAAGGTGTCCCAAAAGCACCGGGACTTGTTCTGTAAGTTCGAAAGTAAGATGGATA  
CAGACATGATCTTGATCTCATTTTAAAGATCAACTCAATACCTATCGATTAAAACCAAGA  
TCAGCTCAATCGGATAAAAATTGACCAAGTTATGGCACTTTGAAATCCGCGAGGAAAGTT  
TACACCTACGGTTTTTAAGGAAGATTCTTCATCGCCGTAAATCAAAAAGTCGGCCTATAA  
AGTGATGCTTATTGTGTTTTTTCATTTTCGAGGTGTCATATATCAACATTTTGTACAAC  
CAAACACAACAGTTGACAGTGCGTATTATTGCAAAGTGCTAAAGGAGTTGAGAATGCACA  
TTCCCGGAAACGGTCGGACTTGAAAGCTTCGTGGATACTCCATCAAGACAAGCGCGGCC  
TCACACATCGAGCTTAACACGTGAATTTATGAGTAAAAATGGAGTTGAAACAATCCCGCA  
TCCCCCTTACAGCCCTGACTTGGCTCCATGTGATTTTTGGATGTTTCCTACACTTAAAAA  
GGAGCTTCGTGGACGAAGATTGCAATCGAAGACCGAAATCCAGAATGCAATTCAAACCTT  
TTTCAACGCCATCCCAGAGGAAGAATTCAGGAAAACAATGTTGGATAAGTGGCAAGAGCG  
CATGAAAAAGTGCATCCGGTTTGATGGACGGTACTTTGAAAAGCAAAAGGAAGTTATGGA  
AGATTCGGAGGAAAGTGGATACGAATATTAACCTTTTGAATCCTGGTAAGCGAAAAATCT  
TCCTAAAAACCGTAGGGGTAACTTTCCTCACTAATTTCAAATTGTCATAACTCGGTCAA  
TTTTTATCCGATTGAGCTGATCTTGGTTTTAATCGATAGGTATTGAGTTGATCTTTAAAA  
TGAGACCAAAATCATGTCTGTATCTATCTTACTTTTGAAGTTACAGAACCAGTCCCGGTA  
CTTTTGGGACACCCTACGTA



--

>Btmar2.9.87\_gi-1092438924-gb-MAMS01007430\_1:-410965-411947  
gi-1092438924-gb-MAMS01007430.1:-410965-411947 Bemisia tabaci isolate MEAM1 Scaffold3872,  
whole genome shotgun sequence 983 bp

TACATAAGGTGTCCCAAAGCACCGGGACTTGTTCTGTAACCTCGAAAGTAAAATAGATA  
CAGACATGATCTTGATCTCATTTTAAAGATCAACTCAATACCTATCGATTAAAACCAAGA  
TCAGCTCAATCGGATAAAAATTGACCGAGTTATGGCAATTTTAAATCAGCGAGGAAATTT  
TACGCCTACGGTTTTTAAGGAAGATTCTTCATCGCCGTAAATCGAAAAGTCGGCCTATAA  
AGTGATGCTTATTGTGTTATTTATTTTCGAGGTGTCATTTAAGTATCAACATTTTGTAC  
CACCAAACACAACAGTTGAGAGTGCGTATTATTGCAAAGTGCTAAAGGAGTTGAGAATGC  
ACATTTCCCGGAAACGGTCGGACTTGAAAACCTTTGTGGATACTCCATCAAGACAAGCGCG  
GCCTCACACATCGAGCTTAACACGTGAATTTATGAGTAAAAATGGAGTTGAAACAATCCC  
TCATCCCCCTTACAGCCCTGACTTGGCTCCATGTGATTTTTGGATGTTTCCTACGCTTAA  
AAAGAAGCTTCGCGGACGAAGATTCGAATCGAAGACCGAAATCCAGAATGCAATTCAAAA  
CTTTTCAACGCCATCCCAGAGGAAGAATTCAGGAAAACAATGTTGGATAAGTGGAAGA  
GCGCATGAAAAAGTGATCCGCTTTGATGGACGGTACTTTGAAAAGCAAAAGGAAGTTAT  
GGAAGATTCGGAGGAAAGTGGATACGAATATTAACCTTTTGAATCCTGGTAAGCGAAAAA  
TCTTCCTAAAAACCGTAGGGGTAACTTTCTCACTAATTTCAAATTGTCATAACTCGGT  
CAATTTTTATTGATTGAGCTGATCTTGGTTTTAATCGATAGGTATTGAGTTGATCTTTA  
AAATGAAACCAAAATCATGTCTGTATCTATCTTACTTTTGAAGTTACAGAACCAGTCCCG  
GTACTTTTGGGACACCCGACGTA

>Btmar2.10.1\_gi-1092455019-gb-MAMS01000152\_1:-2528305-2529319  
gi-1092455019-gb-MAMS01000152.1:-2528305-2529319 Bemisia tabaci isolate MEAM1 Scaffold499,  
whole genome shotgun sequence 1015 bp

TACGAGGCGCGTTCGTAAAGTAAGTATATATCTTTATTTTCTCCGGATTAATGAAGATAA  
ATTAACCGGTAAAAAGTGTTTTAACCGTCATACTCTCAGCTTTTCAAAAAGCCTTCGTT  
TTTTAAATTTGGTCCACCCGTTGCGGAGTGACGTATTTTCCCGCGCCCATCTCTCGTC  
ACCGCGTGTCCAAAATATTCGAGCGCGGCGGAGCTCCTCAGACGAGTACATGTTTTGGCT  
CCGGGATTTTCGGTCGCTCAAGGAATATTGCTGATCGATTACTTAGGAAGAGGAAAAACA  
ATCGATGCCGCAAAATATTGTGAAGTTTTGAAAAAATTAATTCTGCGATCAAGCGAAAA

CGGCCCCGATCTTTTGTCTCGTCAAGTTTTGTTCCCTTCAAGACAACGCTAGGCCTCATGTG  
GCTCATGTGACTAGAGACTTGTTTCGCCTCATTCAAATAGGACCTTTTTCTCATCCATCG  
TACTACCCGAACCTTGCTCCATGCGATTTTCATCTTTTCTGCGTTAAAGAAGAGCTTG  
GGTAGCCGAAAGTTCTCCACCGACGCAGAGTTGCAAGAAGCTGTAAAAAAAATGGTTCC  
AACGACAGGATATGCGCAATTTTTGAAGATTGAATCCACAACTGCTAACATATAATCA  
GAAATGTGTTCAACTGGGTGGAGATCATGTGCGAAAAGCAAGGGAAGACAATTCAAAGCCT  
GAAAGTTTCACATATTTATTCAATTAATGGTGTTACAACCTTTTTTAAAGTGAAAACGTG  
CGTACTCACTCGTCTGAGGAACTCCGCCGCGTTTGAATATTTGGACACGCGGTGACGAG  
AGATGGGCGCGGGAAAAATGACGTCACTCGCGAACGGGTGGACCAAATTTAAAAAACGAA  
GGCTTTTTGAAAAGCTGAGAGTATGACGGTTAAAGCACTTTTTACCGTTTTAATTTATCT  
TCATTAATTCGGAGAAAATAAAGATATATACTTACTTTACGAACGCCCCCTCGTA

>Btmar2.10.2\_gi-1092455019-gb-MAMS01000152\_1-:1813156-1814170  
gi-1092455019-gb-MAMS01000152.1-:1813156-1814170 Bemisia tabaci isolate MEAM1 Scaffold499,  
whole genome shotgun sequence 1015 bp

TACGAGGGGCGTTCGTAAAGTAAGTATATATCTTTATTTTCTCCGGAATAATGAAGATA  
AATTAACCGGTGACAAGTGTTTTAATTGTCATACTCTCAGCTTTTCAAAAAGCCTTTGT  
TTTTTAAATTTGGTCCACCCGTTTCGCGAGTGACGTCATTTTTCCGCGCCCATCTCTCGT  
CACCGCGTGTCCAAATATTCGAGCGCGCGGAGCTCCTCAGACGAGTACATGTTTTGGC  
TCCGGGATTTTGGGTCGCTCAAGGAATATTGCTGATCGATATCTTAGGAAGAGGAAAAAC  
GATCGATGCCGCAAAATATTGTGAAGTTTTGAAAAAATTAATTCAGCGATCAAGCGAAA  
ACGGCCCGATCTTTTGTCTCGTCAAGTTTTGTTCCCTTCAAGACAACGCTAGGCCTCATGT  
GGCTCATGTGACTAGAGACTTGTTTCGCCTCATTCAAATGGGACCTTTTTCTCATCCATC  
GTACTACCCGAACCTTGCTCCATGCGATTTTCATCTTTTCCCTGCGTTAAAGAAGAGCTT  
GGGTAGCCGAAAGTTCTCCACCGACGCAGAGTTGCAAGAAGCTGTAAAAAAAATGGTTCC  
AACGACAGGATATGCGCAATTTTTGAAGATTGAATCCACAACTACTAACGTATAATCA  
GAAATGTGTTCAACTGGGTGGAGATCATGTGCGAAAAGCAAGGTAAGAAAATTCAAAGCCT  
GAAAGTTTCACATATTTATCCAATTAATGGTGTTACAACCTTTTTTAAAGTGAGAACGTG  
CGTACTCACTCGTCTGAGGAACTCCGCCGCGTTTGAATATTTGGACACGCGGTGACTAG  
AGTTGGGCGCGGGAAAAATGACGTCACTCGCGAACGGAGGGACCAAATTTAAAAAACGAA  
GGTTTTTTGAAAAGCTGAGAGTATGACGGTTAAACATTTTATACCGTTTTAATTTATCT

TCATTAGTCCGGAGAAAATAAAGATATATACTTACTTTACGAACGCCCCTCGTA

--

>Btmar2.10.3\_gi-1092455496-gb-MAMS01000029\_1:-5817633-5818632  
gi-1092455496-gb-MAMS01000029.1:-5817633-5818632 Bemisia tabaci isolate MEAM1 Scaffold165,  
whole genome shotgun sequence 1000 bp

TACGAGGGGCATTCGTAAAGTAAGTATATATCTTTATTTTCTCCGAACTAATGAAGATA  
AATTAAATTGGTAAAAATAGTTTTTACCGCCATACTCTCAGCTTTTCAAAAAGCTTTCGT  
TTTTTAAATTTGGTTTACCGGTTACGAGTGACGTCATTTTTCCCGCGCCCATCTCTCGT  
CACTGCGTGTCCAAAATATTCGAATGCGGCGGAGCTCCTCAGACGAGCACATGCTACGGG  
GTTTTGGGACGCTCAAGGAATATTACTGATCGATTTTTTGGAGAGAGGAAAAACGATCGA  
TGCCGCAAGATATTGTGAAGTTTTGAAAAAAAATAAGTCAGCGATCAAGCGAAAACGGCC  
CGGTCTTTTGTCTCGTCAAGTTTTGTTCTTCAAGACGACGCTAGGCCTCATGTGGCTCA  
TGTGACTCAAGACTTGTTGCGCTCATTCAAATGGGACCTTTTTCTCATCCACGGTACTC  
TTCGGACCTTCCTTCAAGCGATTTTCATCTTTTTCTTGCGTTAAAGAAGAGCTTGGGTGG  
CCAAAAGTTCTCCACCGACGCAGAGTTGCAAGAAGCTGTAAAAAAGTGGTTCAGGATGC  
GCAATTTTTTGAAGATGGAATCCGCAAACTGCTAACACGGTATCAGAAGTGTGTTCAACT  
GGATGGAGATTATGTCGCAAAGTAAGGTAGGACAATTCAAAGCCTGAAAGTTTTACATAT  
TTGACCAGTTAACTGTGTTACAACCTTCTTACGGTGAAAACATGTACTCGTCTGAGGAG  
CACCGCCTCCGCCGCGCTCGAATAATTTGGACACGCAGTGACGAGAGATGGGTGCGGGAA  
AAATAACGTCACTCGCGAACCGGTAAACCAAATTTAAAAAACGAAGGCTTTTTAAAAAGC  
TGAGAGTATGGCGGTAAAGAAAATTTTTACCGATTTAATTTATCTTCATTAGTTTCGGAG  
AAAATGAAGATATATACTTACTATACGAATGCCCTCGTA

--

>Btmar2.10.4\_gi-1092425793-gb-MAMS01019745\_1:-3704713-3705727  
gi-1092425793-gb-MAMS01019745.1:-3704713-3705727 Bemisia tabaci isolate MEAM1 Scaffold338,  
whole genome shotgun sequence 1015 bp

TACGAGGGGCGTTCGTAAAGTAAGTATATATCTTTATTTTCTCCAGAACTAATGAAGATA  
AATTTAAACGGTAAAAAGTGTTTTAAACGTCATACTCTCAGCTTTTTTAAAAAGCCTTCGT  
TTTTTAAATTTGGTTCACCCGTTGCGGAGTGATTTTATTTTTCCCGCGCCCATCTCTCGT  
CACCGCTTGTCCAAAATATTCGAGCGCGGCGGAGCTCCTCAGACGAGTACATGTTTTGGC

TCCGGGATTTTGGGTCGCTCAAGGAATATTGCTGATCGATTTCTTAGGAAGAGGAAAAAC  
GATCGATGCCGCAAAATATTGTGAAGTTTTGAAAAAACTTAATTCAGCGATCAAGCGAAA  
ACGGCCCGATCTTTTGTCTCGTAAAGTTTTGTTCCCTTCAAGACAACGCTAGGCCTCATGT  
GGCTTATGTGACTAGAGACTTGTTGCGCTCATTCAAATGGGACCTTTTTCTCATCCATC  
GTACTACCGAACCTTGCTCCATGCGATTTTCATCTTTTTCTGCGTTAAAGAAGAGCTT  
GGATAGCCGAAAGTTCTCCACCGACGCAGAGTTGCAAGAAGCTGTAAAAAAATGGTTCC  
AACGACAGGATATGCGCAATTTTTGAAGATTGAATCCACAACTGCTAACATATAATCA  
GAAATGTGTTCAACTGGGTGGAGATCATGTGAAAAGCAAGGTAAGACAATTCAAAGCCT  
AAAAGTTTCACATATTTATCTAATTAATGGTGTACAACTTTTTTAAAGTGAAAACGTG  
CGTACTCACTCGTCTGAGGAACTCCGCCGCGTTTGAATATTTTGGACACGCGGTGACGAG  
AGATGGGCGCGGGAAAAATGACGTCACTCGCGAATGGGTGAACCAAATTTAAAAACGAA  
GGCTTTTTGAAAAGCTGAGAGTATGACGGTTAAACACTTTTTACCGTTTTAATTTATCT  
TCATTAGTTTCGGAGAAAATAAAGATATATACTTACTTTACGAACGCCCTCGTA

--

>Btmar2.10.5\_gi-1092455666-gb-MAMS01000003\_1:-663767-664780

gi-1092455666-gb-MAMS01000003.1:-663767-664780 Bemisia tabaci isolate MEAM1 Scaffold109, whole  
genome shotgun sequence 1014 bp

TACGAGGGGCGTTCGTAAAGTAAGTATATATCTTTATTTTCTCCGGAATAATGAAGATA  
AATTAACCGGTAAGAAGTTTTTAACCGTCATACTCTCAGTTTTTCAAAAACTTTTGT  
TTTTTAAATTTGGTCCACTCGTTCGCGAGTGACGTCATTTTTCCCGCGCCCATCTCTCGT  
CACCGCGTGTCCAAATATTCGAGCGCGGCGGAGCTCCTCAGATGAGTACATGTTTTGGC  
TCCGGGATTTTGGGTCGCTCAAGGAATATTGCTGATCGAATTCTTAGGAAGAGGAAAAAC  
GATCGATGCCGCAAGATATCGTGAAGTTTTGAAAAAACTTATGTCACCGATCAACCGAAA  
ACAACCCGATCTTTTGTCTCGTCAAGTTTTGTTCCCTTCAAGACAACGCTAGGCCTATTGT  
GGCTCATGTGACTAGAGACTTGTTGCGCTCATTCAAATGGGACCTTTTTCTCATCCATC  
GCACTACCGAACCTTGCTCCATGCGATTTTCATCTTTTTCTGCGTTAAAGAAGAGCTT  
GGGTAACCGAAAGTTCTCCACCGACGCAGAGTTGCAAGAAGCTGTAAAAAAATGGTTCCA  
ACGACAGGATATGCGCAATTTTTTGAAGATTGAATCCACAACTGCTAACACATAATCAG  
AAATGTGTTCAACTGGGTAGAAATCATGTGAAAAGCAAGGCAAGACAATTCAAAGCCTG  
AAAGTTTCACATATTTATCCAATTAATTGTGTTACAACTTTTTTACGGTGAAAACATGC

GTACTCACTTGTCTGAGGAACTCCGCCGCTTGAATATTTTGGACACGCGGTGACGAGA  
GATGGGCGCGGGAAAAATGACGTCACTCGCGAACGGGTGAACCAATTTATAAAACGAAA  
GCTTTTTGAAAAGCTGAGAGTGTGACGGTTAAAACACTTTTTACCGTTTTAATGTATCTT  
CATTAGTTCGGAGAAAAATAAAGATATATACTTACTTTACGAACGCCCTCGTA

--

>Btmar2.10.6\_gi-1092452725-gb-MAMS01001096\_1-:1149986-1151001  
gi-1092452725-gb-MAMS01001096.1-:1149986-1151001 Bemisia tabaci isolate MEAM1 Scaffold1294,  
whole genome shotgun sequence 1016 bp

TACGAGGGGCGTTCGTAAAGTAAGTATATATCTTTATTTTCTCCGGAATAATGAAGATA  
AATTAAGGGTAAAAAGTGTTTTAACCGTCATACTCTCAGCTTTTCAAAAAGCCTTCGT  
TTTTTAAATTTGGTCCACCCGTTTCGCGAGTGACGTCATTTTTCCCGCGCCCATCTCTCGT  
CACCGCGTGTCCAAATATTCGAGCGCGGCGGAGCTCCTCAGACGAGTACATGTTTTGGC  
TCCAGGATTTTGGGTGCTCAAGGAATATTGCTGATCGATTTCTTAGGAAGAGGAAAAAC  
GATCGATGCCGCAAAATATTGTGAAGTTTTGAAAAAACTTAATTCAGCGATCAAGCGAAA  
ACGGCCCGATCTTTCTGCTCTGTCAGTTTGGTTCCTCAAGACAACGCTAGGCCTCATGT  
GGCTCATGTGACTAGAGACTTGTTTCGCCTCATTAAAATGGGACCTTTTTCTCTTCCATC  
GTACTACCGAACCGTGCTCCATGCGATTTCCATCTTTTCTGCGTTAAAGAAGAGCTT  
GGGTAGCCAAAAGTTCTCCACCGATGCAGAGTTGCAAGAAGTTGTAAAAGAAAATGGTTC  
CAACGACAGGATATGCGCAATTTTTTTGAAGATTGAATCCACAACTGCTAACATATAATC  
AGAAATGTGTTCAACTGGGTGGAGATCATGTCGAAAAGCAAGGTAAGACAATTCAAAGCC  
TGAAAGTTTCACATATTTATCCAATTAATGGTGTTACAACCTTTTTTAAAGTGAAAACGT  
GCGTACTCACTCGTCTGAGGAACTCCGCCGATTTCGAATATTTTGGACACGCGGTGACGA  
GAGATGGGCGCGGGAAAAATGACGTCACTCGCGAACGGGTGGACCAAATTTAAAAACGA  
AGACTTTTTGAAAAGCTGAGAGTATGACGGTTAAAACACTTTTTACCGTTCTAATTTATC  
TTCATTAGTTCGGAGAAAAATAAAATATATACTCACTTTACGAACGCCCTCGTA

--

>Btmar2.10.7\*\_gi-1092449565-gb-MAMS01002590\_1-:507724-508740  
gi-1092449565-gb-MAMS01002590.1-:507724-508740 Bemisia tabaci isolate MEAM1 Scaffold1870,  
whole genome shotgun sequence 1017 bp

TACGAGGGGCATTTGTAAAGTAAGTATATATAATCATTTTCTCCGAAACTAATGAAGATA  
AATTAAATCGGTAAAAATTGTTTTACCGCCATACTCTCAGCTTTTCAAAAAGCTTTCGT  
TTTTTAAATTTGGTTCACCGGTTACGAGAGACGTCATTTTCCCGCGCCCATCTCTCG  
TCACTGCGTGTCCAAAATATTTGAGTGCGGCGGAGCTCCTCAGACGAGTACATGCTACGG  
TGTTTTGGGACGCTCAAGGAATATTACTGATCGATTTCTTGAGAGCGGAAAAACGATGA  
ATGCCGCAAGATATTGTGAAGTTTTGAAAAAATTAAGTCAGCGATCAAGCGAAAACGGC  
CCGGTCTTTTGTTCGTAAAGTTTTGCCCTTCAAGACAACCTCATGTGGCTCATGTGAC  
TCAAGACTTGTTGCGCTCATTCAAATGGGACCTTTTCCCTCATCCACCGTACTCACCTGA  
CCTTCCTCCAAGCGATTTTCATCTTTTTCTTGCGTTAAAGAAGAGCTTGGGTGGCCAAAT  
TTCTCTACCGACGCAGAGTTGCAAGAAGCTGTGAAAAAATGGTTCCAACAACTGCAGGAT  
GCGCAATGTTTTGAAGATGGAATCCGGAAACTGCTAACACGGTAGGTATCAGAAATGTGT  
TCAACTGGGTGGAGATTATGTCGGAAGTAAGGTAAGACAATTCAAAGCCTGAAAGTTTC  
ACATATTTAACCAATTAACTTTGTTACAACCTTACAACCTTCTTACGGTGAAAGCATGTA  
CTCGTCTGAGGAGCACCGCCACCACCACGCTCGAATATCTTGACACGCAGTGACGAGAG  
ATCGGCGCGGGAAAAATGACGTCACTCGGAACCGGTGAACCAAATTTAAAAACGAAGG  
CTTTTTGAAAAGCTGAGAGTATGGCGGTAAAAAAAATGTTTACCGATTTAATTTACCTAT  
CTTCATTAGTTTCGGAGAAAATAAAGATATATACTTACTTTACGAATGCCCCTCGTA

--

>Btmar2.10.8\_gi-1092451505-gb-MAMS01001621\_1-:518022-519020  
gi-1092451505-gb-MAMS01001621.1-:518022-519020 Bemisia tabaci isolate MEAM1 Scaffold1496,  
whole genome shotgun sequence 999 bp

TACGAGGGGCATTCGTAAAGTAAGTATATATCTTTATTTTCTCCGAAACTAATGAAGATA  
AATTAAATCGAAAAACGTCGTTTTACCGCCATACTCTCAGCTTTTCAAAAAGTCTTCGT  
TTTTTAAATTTGGTTCACCGGTTGCGGAGTGACGTCATTTTCCCGCACCCACCTCTCGT  
CACTGCGTGTCCAAAATATTCGAGTGCGGCGGAGCTCCTCAGACGAGTACATGCTACGGT  
GTATTGGGGCGCTCAAGGAATATTACTGATAGATTTCTTGAGAGAGGAAAACCGATCGA

TGCCGCAAGATATTATGAAGTTTTGAAAAAATTAAGTCAGCGATCAAGCGAAAACGGCC  
CGGTCTTTTGTCTCGTCTAGTGTTGTTTCCTTCAAGACACCGCTAGGCCTCATGTGACTCA  
AGACTTGTTGCCTCATTCAAATGGGACCTTTTTCTCACCCACGGTACTCACCGTACCT  
TCCTTCAAGCGATTTTCATCTTTTTCTTGC GTTAAAGAAGAGCTTGGGTGGCAAAAATT  
CTTTACCGACGCAGAGTTGCAAGAAGCTGTAAAAACAATGGTTCCAACGACAGGATGCGC  
AATTTTTTTGAAGATGGAATCCGCAAACCTGCTAAACACGGTATCAGAAATGTGTTCAACTG  
GGTGGAGATTATGTCGAAAAGTAAGGTAAGACAATTCAAAGCCTGAAAGTTTCACATATT  
TAACCAATTAAGTGAAGTTACAACCTTCTTTACGCTGAAAACATATACTGGTCTGAGGAGC  
ACCGCCACCGCCGCGCTCGAATATTTTGGACACGCAGTGACGAGAGATGGGCGCGGGAAA  
AATGACGTCACCTCGCGAACCGGTAAACCAAATTTAAAAAAGAAGACTTTTTGAAAAGCT  
GAGAGTATGGCGGTGAAAACAACGTTTACCGATTAAATTTATCTTCATTAGTTTCGGAGA  
AAATAAAGATATATACTTACTTTACGAATGCCCTCGTA

--

>Btmar2.10.9\_gi-1092434953-gb-MAMS01010585\_1-:219541-220545  
gi-1092434953-gb-MAMS01010585.1-:219541-220545 Bemisia tabaci isolate MEAM1 Scaffold5223,  
whole genome shotgun sequence 1005 bp

TACGAGGGGCATTCGTAAAGTAAGTATATATCTTTATTTTCTCCGAACTAATGAAGATA  
AATTAAATCGGTAAACGTCGTTTTTACCGCCATACTCTCAGCTTTTCAAAAAGTCTTCGT  
TTTTTAAATTTGGTTCACCGGTTTCGCGAGTGACGTCATTTTCCCGCACCCACCTCTCGT  
CACTGCGTGTCCAAATATTCGAGTGCGGCGGAGCTCCTCAGACGAGTACATGTTACGGT  
GTTTTGGGGCGCTCAAGGAATATTACTGATCGATTTCTTGGAGAGAGGAAAAACGATCGA  
TGCCGCAAGATATTGTGAAGTTTTGAAAAAATTAAGTCAGCGATCAAGCGAAAACGGCCC  
GATCTTTTGTCTCGTCAAGTGTTGTTTCCTTCAAGACAACGCCAGGCTTCATGTGACTCAT  
GTGACTCAAGACTTGTTGCCTCATTCAAATGGGACCTTTTTCTCATCTACGGTACTCA  
CTAGACCTTCCTTCAAGCGATTTTCATCTTTTTCTTGC GTTAAAGAAGAGCTTGGGTGGC  
CAAAAGTTCTCCACCGACGCAGAGTTGCAAGAAGCTGTAAAAAATGGTTCCAACAACAG  
GATGCGCAATTTTTTTGAAGAGGGAATCCGCAAACCTGCTAACACGGTATCAGAAATATGTT  
CAACTGGATGGAGATTATGTCGAAAAGTAAGGTAAGACAATTCAAAGCCTGAAAGTTTCA  
CATATTTAACCAATTAAGTGTGTTACAACCTCCTTTACGCTTAAAACATATACTCGTCTG

AGGAGCACCGCCACCGCCGCGCTCGCATATTTTGGACACGCAGTGACGAGAGATGGGCGC  
GGGAAAAATGACGTCACTCGCGAACCGGTAAACCAAATTTTAAAAACGAAGACTTTTTGA  
AAAGCTGAGAGTATGGCGGTAAAAAAAACGTTTACCGATTAAATTTATCTTCATTATTTT  
CGGAGAAAATAAAGATATATACTTCCTTTACGATTGCCCTCGTA

--

>Btmar2.10.10\_gi-1092455517-gb-MAMS01000027\_1-:2086676-2087686  
gi-1092455517-gb-MAMS01000027.1-:2086676-2087686 Bemisia tabaci isolate MEAM1 Scaffold155,  
whole genome shotgun sequence 1011 bp

TACAAGGGGCATTTCATAAAGTAAGTATATTTCTTTATTTTCTCCGAACTAATAAAGATA  
AATTAAACTGTAAAAATCGTTTTATCGCCATACTCTCAGCTTTTCAAAAAGTCCTCGT  
TTTTTAAATTTGGTTTACCGGTTCTGTGAGTGACGTATTTTCCCGCGCCCATCTCTCGT  
CACCGCGTGTCCCAAATATTCGAGCGCGGTGGAGCTCCTCAGACGAGTACATGTTTTGGC  
TATGGTGCTTTGGAACGCTCAAGGAATATTGCTTATCAATTTCTTGAAAGAGTAAAAAC  
GATCGATGCCGAAATATATTGTAAAGTTTTGAAAAAACTTAAGTCAGCGATCAAGCGAAA  
ATGACCGGGTCTTTTGTCTCGTCAAGTTTTGTTCTTCAAGACAACGCTAGGCCTCATGT  
GGCTCATGTGACTCAAGACTTGTTGCGCTCATTCAAATATATGGGACCTTTTCCCTCATC  
CACCGTACTCACCAGACCTTGCCCCAAGCGATTTTCATCTTTTCTGCGTTAAAGAAGA  
GCTTGGGTGGCCGAAAGTTCTCCACCGACACAGAGTTGCAAGAAGCTGTAAAGAAATGGT  
TCCAACAACAGGATGCGCAATTCTTTGAAGATGGAATCCACGAACTGCTAACACGGTATC  
AGACTTGTGTTCAACTGGTTGGAGATTATGTGCAAAAAGTAAGGTAAGACAATTCAAAGCC  
TGAAAGTTTCACATAGTTAACCAATCAACTGTGTTACAACCTTCTTTACGGTGAAAACAT  
GTACTCGTCTGAGGAGCTCCGTCGCGCTTAATATTTTGGACACGCGGTGACGAGAGATG  
GGCGTGGGAAAAATGACGTCACTCGCAATCCGGTAAACCAAATTTAAAAAAACGAAGGCT  
TTCTGGAAGCTGAGAGTATGGCGGTATAACAATTTTACCGTTTAAATTTATCTTCAT  
TAGTTTCGGAGCAAAAAAAGATATATACTTACTTTACGAATGCCCTTGTA

--

>Btmar2.10.11\_gi-1092438700-gb-MAMS01007559\_1-:639573-640587  
gi-1092438700-gb-MAMS01007559.1-:639573-640587 Bemisia tabaci isolate MEAM1 Scaffold39221,  
whole genome shotgun sequence 1015 bp

TACGAGGGGCGTTCGTAAAGTAAGTATATATCTTTATTTTCTCCGAACTAATGAAGATA



AATTAACCGGTAAAAAGTGTTTAACCGTCATACTCTCAGCTTTTTAAAAAGCCTTCGT  
TTTTTAAATTTGGTCCACCCGTTTCGCGAGTGACGTCATTTTCCAGCGCCCATCTCTCGT  
CACCGCGTGTCCAAATATTCGAGCGCGGCGGAGCTCCTCAGACTAGTACATGTTTTGGC  
TCCGGGATTTTGGGTGCTCAAGGAATATTGCTCATCAAATCTTAGGAAGAGGAAAAAC  
GATCGATGCCGCAAGATTTTTGAAGTTTTGAAAAAACTTAATTCAGCGATCAAGCGAA  
AACGGCCCGATCTTTTGTCTCGTCAAGTTTTGTTCTTCAAGACAACGCTAGACCTCATG  
TGGCTCATGTAAGTACTAGAGACTTGTTGCGCTCATTCAAATGGGACCTTTTTCTCATCCAT  
CGTACTCACCGGACCTTGCTCCATGTGATTTTCATCCTTTCTGCGTTAAAGAAGAGCT  
TGGGTAGCCGAAAGTTCTCCACCGACGCAGAGTTGCAAGAAGCTGTAAAAAATGGTTCC  
AACGACAGGATATGCGCAATTTTTGAAGATTGAATCCACAACTGCTAACACATAATCA  
GAAATGTGTTCAACTGGGTGGAGATCATGTGAAAAGCAAGGTAAGACAATTCAAAGCCT  
GAAAGTTTCACATATTTATCCAATTAATTGTGTTACAACCTTTTTACGGTGAAAACATG  
CGTACTCACTCGTCTGAGGAACCTGCGCGCTCGAATATTTGGACACGCGGTGACGAG  
AGATGGGCGCGGGAAAAATGACGTCACTCGCGGACGGGTGGACCAAATTTAAAAACGAA  
AGTTTTTTGAAAAGCTGAGAGTATGACGGTTAAACACTTTTTACCGTTTTAATTTATCT  
TCATTAGTTCGGGGAAAAATAAAGATATATACTTACTTTACGAACGCCCCCTCGTA

--

>Btmar2.10.12\_gi-1092450830-gb-MAMS01001983\_1-:148885-149887  
gi-1092450830-gb-MAMS01001983.1-:148885-149887 Bemisia tabaci isolate MEAM1 Scaffold16415,  
whole genome shotgun sequence 1003 bp

TACGAGGAGAATTCGTAAAGTATGTATATATCTTTATTTTCTCCGAACTAATCAAGATA  
AATTTAATCGGTAAAAATTGTTTTACCGCCATACTCTCAGCTTTTCAAACGTCTTCGT  
TTTTCAAATTTGGTTTACCGGTTTTCGCGAGTGACGTCATTTTCCCGCGCCCATCTCTCAT  
CACTGCGTGTCAAAAATATTCGAGTGCGGCGGAACTCCTCAGACGAGTACATGCTACAGT  
GTTTTAGGACGCTGAAGGAATATTACAGATCGATTTCTTGAGTGAGGAAAAACGACCAA  
TGCCACATGATACTGTGAAGTTTTGAAAAAAATTAAGTCAGCGATCAAGCGAAAAACAGCC  
CGGTCTTTTGTCTCGTAAAGTTTTGTTCTTCAAGACAACGCTAGGCCTAATGCGGCTCA  
TGTGACTCAAACTTGTTGGCCTCATTCAAATGGGACCTTTTTCTCATCCATCGTACTC  
ACCGGACCTTCTCCAAGCGATTTTCATCTTTTCTTGATTAAAGAAGAGCTTGGATGG

CCAAAAGTTCTCCATCGATGCAGAGTTGCAAGAAGCTGTAAAAAATGGTTCCAACGACA  
GGATGCGCAATTTTTTTGAAGATGGAATCCGCAAACCTAGCACGGAATCAGAAATGTGT  
TTAAGTGGGTTGAGATTATGTGCGAAAATTAAGGTAAGACAATTCAAAGCCTGAAAGTTTC  
ACATATTTAACCAATTAAGTGTGTTAGAACCTTCTTTACAGTGAAAACATGTACTCGTCT  
GAGGAGCACCGCCACCGCCGTGCTCGAATATTTGCGACACGCAGTGACAGGAGATGGGCG  
CGGGAAAAATGACGTCACTTGCGAACCGGTAAACCAAATTTAAAAACGAAGACTTTTTG  
AAAAGCTGAGAGTATGGCAGTAAAAACCATTTTTACCGATTAAATTTATCTTGATTAGTT  
TCGGAGAAAAATACAGATATATACTTACTTCACGAATGCCCCCTC

>Btmar2.10.13\_gi-1092455610-gb-MAMS01000013\_1-:720139-721153

gi-1092455610-gb-MAMS01000013.1-:720139-721153 Bemisia tabaci isolate MEAM1 Scaffold128, whole  
genome shotgun sequence 1015 bp

TACGAGGGGCGTTCGTAAAGTAAGTATATATCTTTATTTTCTCCGAAACTAATGAAGATA  
AATTATAACGGTAAAAAGTGTTTTAACCGTCATACTTTCAGCTTTTCAAAAAGCCTTCAT  
TTTTTAAATTTGGTCCACCGTTCGCGAGTGACGTCATTTTCCCGCGCCCATCTCTCGT  
CACCGTGTGTCCAAAATATTCGAGTGCGGCGGAGCTCCTCAGAAGAGGACATGTTTTGGC  
TCCGGGATTTTGGGTGCTCAAGGAATATTGCTGATCGATTTCTCAGGAAGAGGAAAAAC  
GATCGATGCCGCAAAAATATTGTGAAGTTTTGAAAAAAGCTTAATTCAGGGATCAAGCGAAA  
ACGGCCCGATCTTTTGTCTCGTCAAGTTTTGTTCTTCAAGACAACGGTAGGCCTCATGT  
GGCTCATGTGACTAGAGACTTGTTGCGCTCATTCAAATGGGACCTTTTTCTCATCCATC  
GTACTCACCGAACCTTGCTCCATGCGATTTTCATCTTTTCTGCGTTAAAGAAGAGCTT  
GGGTAGCCGAAAGTTCTCCACCGATGCAGAGTTGCAAGAAGCTGTAAAAAATGGTTCC  
AACGACAGGATATGCGCAATTTTTTTGAAGATTGAATCCACAACTGCTAACATATAATCA  
GAAATGTATTCAACTGGGTGGAGATCATGTGCGAAAAGCAAGGTAAGACAATTCAAAGCCT  
GAAAGTTTCACATATTTATCCAATTAATGGTGTTACAACCTTTTTTAAAGTGAAAACGTG  
CGTACTTACTCGTCTGAGGAACTCCGCCGATTCGAATATTTTGACACGCGGTGACGAG  
AGATGGGCGCGGGAAAAATGACGTCACTCGCGAACGGGTAAACCAAATTTAAAAACGAA  
AGCTTTTTGAAAAGCTGAGAGTATGACGGTTAAACACTTTTTTACCGTTTTAATTTATCT  
TCATTAGTTCGGAGAAAATAAAGATATATACTTACTTTACGAACGCCCCCTCGTA

>Btmar2.10.14\_gi-1092446804-gb-MAMS01003789\_1-:464399-465394  
gi-1092446804-gb-MAMS01003789.1-:464399-465394 Bemisia tabaci isolate MEAM1 Scaffold2349,  
whole genome shotgun sequence 996 bp

TACGAGGGGCGTTCGTAAAGTAAGTATATATCTTTATTTTCTCCGGAAC TAATGAAGATA  
AATTAACCGGTAAAAAGTGTTTAAACCGTCATACTCTCAGCTTTTCAAAAAACCTTCGT  
TTTTTAAATTTGGTCCACCCGTTGCGGAGTGACGTCATTTTCCCGCGCCCATCTCTCGT  
CACCGCGTGTCCAAAATACTCGAGCGCGGCGGAGCTCCTCAGACGAGTACATGTTTTGGC  
TCCGGGATTTTGGGTCGCTCAAGGAATATTGCTGATCGATTTCTCAGGAAGAGGAAAAAC  
GATCGATGCCGCAAAATATTGTGAAGTTTGAAAAACTTAATTCAGCGATCAAGCGAAA  
ACGGCCCGATCTTTTGTCTCGTCAAGTTTGTTCCTTCAAGACAACGCTAGGCCTCATGT  
GGCTCATGTGACTAGAGACTTGTTGCGCTCATTCAAATGGGACCTTTTCTCATCCATC  
GTACTACCGAACCTTGCTCCATGCGATTTTCATCTTTTCTGCGTTAAGAAGAGCTT  
GGGTAGCCGAAAGTTCTCCACCGACGCAGGGTTGCAAGAAGCTGTAAAGAAAATGGTTTC  
AACGACAGGATATGCGCAATTTTGAAGATTGAATCCACAACTGCTAACATATAATCA  
GAAGTGTGTTCAACTGGGTGGAGATCATGTGAAAAGCAAGGTAAGACAATTCAAAGCCT  
GAAAGTTTCACATATTTATCCAATTAATGGTGTTACAACCTTTTAAAGTGAAAACGTG  
CGTACTCACTCGTCTGAGGAACTCCGCCGCGTTTGAATATTTTGGACACGCGGTGACGAG  
AGATGGGCGCGGGAAAAATGACGTCACTCGCGAACGGGTGGACCAAATTTAAAAAACGAA  
GGCTTTTGAAGAGCTGAGAGTATGACGGTTAAACACTTTTACCGTTTAAATTTATCT  
TCATTAGTTCGGGAGAAAATCATTAAATATAAACTTC

--

>Btmar2.10.15\_gi-1092447389-gb-MAMS01003534\_1-:550628-551329  
gi-1092447389-gb-MAMS01003534.1-:550628-551329 Bemisia tabaci isolate MEAM1 Scaffold2250,  
whole genome shotgun sequence 702 bp

GGAAAAACGATCGATGCCGCAAGATATTGTGAAGTTTGA AAAATCTTAAGTCATCAGCG  
ATCAAGCGAAAAACGGTCCGGTCTTTGTCTCGTCAAATTTGTTCTTCATAACAACGCT  
AGGCCTCATGTGGCTCATCTCATGTGACTCAAAAGTTGTTGCTCTCATTCAAATGAGACC  
TTTTCTCATCCACCGTACACACCGGACCTTGCTCCAAGCGATTTTCATATTTTTCATG  
CGTTAAAGAAGAGCTTGTTGGCCAAAAGTTCTCCACCGACGCAGAGTTGCAAAAGAACC  
TGTTAAAAAATTGTTCCAATATACAGGATGCGCTACAGGATTTGAAGATTGAATCCACA

AATTGCTAACACGATATCAGAAGTGTGTTCAACTGGGAGGAGATTATGTCGAGAAGTAAG  
GTAAGACAATTCAAAGCCTGAAATGTTACATACTTATAACCAATTAAGTGTGTTACAAG  
CTTCTTTACGGTGAGAGCATGTACTCGTCTGAGGAACTTCGCCAGGCTCGAATATTTTG  
ACACGTGGTGACGAGAGATGGGCGCGGGAAAAATGGCGTCACTCGCGAGCCGGTTAACCA  
AATTTATAAAACGAAGGCTTTTGAAAAGCTGAGAGTATGACGGTAAAAACAATTTTACA  
GTTTTAATTAATCTTCATTAGTTTCGGAGAAAATATAGATAT

>Btmar2.11.1\_gi-1092425897-gb-MAMS01019641\_1-:6059455-6060468  
gi-1092425897-gb-MAMS01019641.1-:6059455-6060468 Bemisia tabaci isolate MEAM1 Scaffold959,  
whole genome shotgun sequence 1014 bp

TACGAGGGGCGTTCGTAAAGTAAGTATATATCTTTATTTTCTCCGGAATTAATGAAGATA  
AATTAACCGGTAAAAAGTGTTTAACCGTCATACACTCAGCTTTTCAAAAAGCCTTCGT  
TTTTTAAATTTGGTCTACCCGTTTCGCGAGTGACGTCATTTTCCCGCGCCCATCTCTCGT  
CACCGCGTGTCCAAATATTCGAACGCGGCGGAGTTCCTCAGACGAGTGAGTACGCATGT  
TTTACCCTAAAAAGGTTGTAACACAATTAATTGGATAAATATGTGAACTTTCAGGCT  
TTGAATTGTCTTACCTTGCTTTTCGACATGATCTCCACCCAGTTGAACACATTTCTGATT  
ATGTGTTAGCAGTTTGTGGATTCAATCTTCAAAAATTGCGCATATCCTGTCGTTGGAAC  
CATTTTTTTACAGCTTCTTGCAACTCTGCGTCGGTGGAGAACTTTCGGCTACCCAAGCTC  
TTCTTTAACGCAGGAAAAAGATGAAAATCGCATGGAGCAAGGTCCGGTGAGTACGATGGA  
TGAGGAAAAAGGTCCCATTTGAATGAGGCGAACAAGTCTCTAGTCACATGAGCCACATGA  
GGTCTAGCGTTGTCTTGAAGGAACAAAACCTTGACGAGACAAAAGATCGGGCCGTTTTCGC  
TTGATCGCTGAATTAAGTTTTTTCAAAAATTCACAATATCTTGCGGCATCGATCGCCTT  
CCTCTCCTAAGAATTTGATCAGCAATATTCCTTGAGCGACCCAAAATCCCGGAGCCAAA  
ACATGTACTAGTCTGAGGAGCTCCGCCGCGCTCGAATATTTTGACACGCGGTGACGAGA  
GATGGGCGCGGGAAAAATGACGTCACTCGCGAACGGGTGTACCAAAATTTAAAAACGAAA  
GCTTTTTGAAAAGCTGAGAGTATGACGGTTAAACACTTTTTACCGTTTTAATTTATCTT  
CATTAGTTCGGGAGAAAATAAAGATATATACTTACTTTACGAACGCCCTCGTA

--

>Btmar2.11.2\_gi-1092446718-gb-MAMS01003827\_1-:345993-346992  
gi-1092446718-gb-MAMS01003827.1-:345993-346992 Bemisia tabaci isolate MEAM1 Scaffold2362,  
whole genome shotgun sequence 1000 bp

TACGAGGGGCATTCGTAAAGTAAGTATATATCTTTATTTTCTCCAAACTAATGAAGATA  
AATCAAAACAGTAAAAATTGTTTTGACCGCCATACTCTCAGCTTTGCAAAAAGCCTTCGT  
TTTTTTAAATTTGGTTTACTGGTTCGCGAGTGATGTCATTTTTCCCGTGCCCATCTCTGG  
TTACCGCGTGTCCAAAATATTCGAGGGCGGCGGAGCTCCTCAGACGAGTACATGTTTTCA  
CCGTAAAGAAGTTTGTAAACACAGTTGATTGGTTAAATATGTGAAATTTTAGGCTTTGAA  
TTGTCTTACCTTACTTTTGGACTTAACTTCACCCAGTTGAACACATATCTGATACCGTGT  
TAGCAGTTTGTGGATTCCATCTTCAAAGAATCTCGCATTCTGTTGTTGGAATACAGCTTC  
TTGCAACTCTCTGTCGGTAAAGAACTTTGGCCACCCAAGCTCTTCTTTATCGCAGGAAA  
AAGATGAAAATCGCTTGAGCAAGGTCCGGTGAGTACGGTAGATGAAGAAAAAGGTCCCA  
TAAATTGAATGAGGCGAACAAGTCTTGACTCACATGAGCCACATGAGGCCTAGTGTTGTC  
TTGAAGGAACAAAACCTTGATGAGACAAAAGACCTGGTCATTTTCGCTTGATCGCTGACTT  
AAGTTTTTTCAGAACTTCACAACATACTTCGGCATAGATCGTTTTTCCTCTTTCCAAGAA  
ATCGATCAGCAATATTCCTTGAGCGTCCCAAAACATCGTAGCCAAAACATGTACTTGTCT  
GAGGAGCTCCGCCGCGCTCGAATATTTTGGACACGCGGTGACGAGAGATGGGCGCGGGAA  
AAATGATGTCACTTGCGAACTGGTAAACCAAATTTAAAAAACGAAGGCTTTTGAAGAGC  
TGAGAGTATGGTGGTAAAAACAATTTTACC GTTTTAATTTATCTTTATTAGTTTCGGAG  
AAAATAAAGATATATACTTACTTTACGAATGCCCTCGTA

>Btmar2.11.3\_gi-1092446718-gb-MAMS01003827\_1-:360475-361480

gi-1092446718-gb-MAMS01003827.1-:360475-361480 Bemisia tabaci isolate MEAM1 Scaffold2362,  
whole genome shotgun sequence 1006 bp

TACGAGGGGCATTCGTAAAGTAAGTATATATCTTTATTTTCTCCGAAACTAATGAAGATA  
AATTAATGTTAAAGATTGTTTTACCGCCGTA CTCTCAGCTTTTCGAAAAGCCTTCGT  
TTTTTAAATTTGGTTTACCGTTTCGCGAGTGACATCAATTTTCCGCGCCCATCTCTCGT  
CACCGCGTGTCCAAAATATTTGAACGCGGCGGAGCTCCTCAGACGAGTGAGTAAGCAGGT  
TTTCTCCATAAAGAAGGTTGTAAACACAGTTAATTGGTTAAATATGTGAACTTTCAGGCT  
TTGAATTGTCTTACCTTACTTTTCGACATAATCTCCACCCAGTTGAACACATTTCTGATT  
ATATGTGTTAGCAGTTTGTGGATTCTATCTTCAAAAAATTGCGCATATCCTGTCGTTGGA  
ACCATTTTTTTACAGCTTCTTGCAACTTTGCGTCGGTGGAGAACTTTTGACCACCCAAGC  
TCTTTTTTAATGCGGGAAAAAGATAAAAAATTGCTTAGAGCAAGGTCCGGTGAGTACGATG  
GATGAGGAAAAAGGTCCCTTTGAATGAGGCGAACAAGTCTCGATTCTATGAGGCCTAGC

GTTGTCTTGAAGAAACAAAACCTTGACGAGACAAAAGATCGGGCCGTTTTCGCTTGATCGC  
TGAATTATGTTTTTCTAACTTCACAATATATTGCTGCATCGATCATTTTTCTCTTCC  
CAAGAAATCGATTAGCAATATTCCTTGATCGTCCCAAAACACCGTAGCCAAAACATGTAC  
TCGTCTGAAGAGCTCCGCCGCTCGAATATTTGGACACGCGGTGACGAGAGATGAATG  
CGGGAAAAATGACGCCACTCGCGAACCGGTAAACCAAATTTAAAAAATGAAGACTTTTTG  
AAAAGCTGAGAGTATGGCGGTAAAAACAATCCTCACCGTTTTAATTTATCTTCATTAGTT  
TCAGAGATAATAAAGATATATACTTACTTTACGAATGCCCCTCGTA

--

>Btmar2.11.4\_gi-1092454833-gb-MAMS01000205\_1-:1235740-1236749  
gi-1092454833-gb-MAMS01000205.1-:1235740-1236749 Bemisia tabaci isolate MEAM1 Scaffold641,  
whole genome shotgun sequence 1010 bp

TACGAGGGGCATTCGTAAAGTAAGTATATATCTTTATTTTCTCCGGAACATAATGAAGATA  
AATTACATCGGTAAAAATTGTTTTACCGCCATACTCTCAGCTTTTCAAAAAGCCTTCGT  
TTTTTTAAATTTGGGTTACCGGTACCCGAGTGACGTCAATTTCCCGCGCCCATCTCTCG  
TCACTGCGTGTCCAAAATATTCGAGCGCGGCGGTGGCGGTGCTCCTCAGACGAGTAGATG  
TTTTCACCGTAAAGAAGGTTGTGACACAGTTAATTGGTTACATATGTGAAACTTTCAGGC  
TTTGAATTGTCTAACCTTACTTTTCGACATAATATTCACCCAGTTAAACACATTTCTGAT  
ACCGTGTTAGCAGTTTGCGGATTCCATCTTCAAAAAATTGCGCATCCTGTCGTCGGAACG  
ATTTTTTTACAGCTTCTTGCAACTCTGCGTCGGTGGAGAACTTTGGCCACCCATAAATT  
CTTCTTTAACGCAAGAAAAAGATGAAAAATCGCTTGGAGGAAGGTCCGGTGAGTACAGTAG  
ATGAGGAAAAAGGTCCCATTTGAATGAGGCAACAAGTCTTGAGTCACATGAGCCACATG  
AGACCTAACGTTGTCTTGAAGGAAAAAACTTGACGAGACAAACGACCGGGCCGTTTTCG  
CTTGATCGCTGACTCAATTTTTTTCAAACTTCACAATATCTTGCGGCATCGATCGTTTT  
TCCTCTCTCCAAGAAATCGATCAGTAATATTCCTTGAGCGTCCCAAAACACCGTAGCATG  
TACTCGTCTGAGGAGCTCCGCCGCACTCGAATATTTTGGACACGCAGTGACGAGAGATGG  
GCGCGGGAAAAATGACGTCACTCGCGAACCGGTAAACCAAATTTAGGAAACGAAGGCTTT  
TTGAAAAGCAGAGAGTATGGCGGTAAAAAAAATATTTACCGATTTAATTTATCTTCATT  
AGTTTTGGAGAAAAATGAAGATGTATACTTACTTTACGAATGCCCCTCGTA

--

>Btmar2.11.5\_gi-1092455529-gb-MAMS01000026\_1-:6799813-6800826  
gi-1092455529-gb-MAMS01000026.1-:6799813-6800826 Bemisia tabaci isolate MEAM1 Scaffold15,  
whole genome shotgun sequence 1014 bp

TACGAGGGGCGTTCGTAAAGTAAGTATATATCTTTATTTTCTCCGGAATAATGAAGATA  
AATTAACCGGTAAATGTGTTTTAACCGTCATACTCTCAGCTTTTCAAAAAGCCTTCGT  
TTTTTAAATTTGGTCCACCCGTCGCGAGTGACGTCATTTTCCCGCGCCCATCTCTCGT  
CACCGCGTGTCCAAATGTTCGAACGCGGCGGAGTTCCTCAGACGAGTGAGTACGCATGT  
TTTACCAGTAAAAAGGGTTGTAACACAATTAATTGGATAAATATGTGAAAATTCATGCT  
TTAAATTGTCTTACCTTGCTTTTCGACATGATCTCCACCCAGTTGAACACATTTCTGATT  
ATGTGTTAGCAGTTTGTGGATTCCATCTTCAAAAATTGCGCATATCCTGTCGTTGGAAT  
CATTTTTTTACAGCTTCTTGCAACTCTGCGTCGGTGGAGAACTTTCGGCTACCCAAGCTC  
TTCTTTAACGCAGGAAAAAGATGAAAATCGCATGGAGCAAGGTCCGGTGACTACGATGGA  
TGAGGAAAAAGGTCCCATTTGAATGAGGCGAACAAGTCTCTAGTCACATGAGCCACATGA  
GGCCTAGCGTTGTCTTGAAGGAACAGAACTTGACGAGACAAAAGATCGGGCCGTTTTCGC  
TTGATCGCTGAATTAAGATTTTTCAAACCTCACAATATCTTGCGGCATCGATCGTTTTT  
CCTCTTCCTAAGAAATCGATCAGCAATATTCCTTGAGCCACCCAAAATCCCGGAGCCAAA  
ACATGTACTCGTCTGAGGAGCTCCGCCGCGCTCGAATATTTGGACACGCGGTGACGAGA  
GATGGGCGCGGGAAAAATGTCGTCACTCGCGAACGGGTGGACCAAATTTAAAAAACGAAG  
GCTTTTTGAAAAGCTGAGAGTATGACGTTTAAACACTTTTTACCGTTTTAATTTATCTT  
TATTAGTTCGGAGAAAAATAAGAAATATACTTACTTTACGAACGCCCTCGTA

--

>Btmar2.11.6\_gi-1092427769-gb-MAMS01017769\_1-:57172-58006  
gi-1092427769-gb-MAMS01017769.1-:57172-58006 Bemisia tabaci isolate MEAM1 Scaffold844, whole  
genome shotgun sequence 835 bp

TACGAGGGGCATTCGTAAAGTAAGTATATATCTTTATTTTCTTCGAAATAATGAAGATA  
AATTAATCGGTAAACATTGTTTTAACCGTCATACTCTCAGCTTTCAAAAACCTTCGT  
TTTTTAAATTTGGTTTACCGGTCGCGAGTGACGCCATTTTCCCGCGCCCATCTCTCGT  
CACTGCGTGTCCAAATATTCGAGCGCGGCGGTGGCGGTGCTCCTGAGACGAGTACATGT  
TTTACCAGTAAAGAAGCTTGTAACACAGTTAATTGGTTAAATATGTGAACTTTCAAGCT

TTGAATTGTCTTACCTTACTTTTCGACATAATCTCCACCTAGTTGAACACATTTCAAATA  
CCGTGTTAGCAGTTTGTGGATTCCATCTTCAAAAAATTGCGCATCTGTCTTTGGAACCA  
TTTTTTTTTACAGCTTCTTGCAACTCTACGTCGGTTGAGAACTTTTGGCCACCCAAGCTC  
TTCTTTAACGCAAGAAAAAGATGAAAATCGCTTGGAGGAAGGTCCGGTGAGTACCGTGGA  
TGAGGAAAAAGGCCCCATTTGAATGAGGCGAACAAGTCTTGCGTCACATGAGCCACATGA  
GGCCTAGCGTTGTCTTGAAGGAACAACACTTGACGAGACAAAAGACCGGGCCGTTTTTCGC  
TTGATCGCTGACTTAATTTTTTTCATAACTTGACAATATCTTGCGGCATCGATCGTTTTT  
CCTCTCTCCAAGAAATCTATCAGTAATATTCCTTGAGCGTCCCAAAACACCGTAGCATGT  
ACTCGTCTGAGGAGCTCCGCCGCACTCGAATATTTTGGACACGCAGTGACGAGAG

--

>Btmar2.11.7\*\_gi-1092454995-gb-MAMS01000159\_1-:2044663-2045680  
gi-1092454995-gb-MAMS01000159.1-:2044663-2045680 Bemisia tabaci isolate MEAM1 Scaffold519,  
whole genome shotgun sequence 1018 bp

TACGAGGGGCGTTCGTAAAGTAAGTATATATCTTTATTTTCTCCGGAATAATGAAGATA  
AATTAACCGGTAAATGTGTTTTAACCGTCATACTCTCAGCTTTTCAAAAAGCTTTCGT  
TTTTTAAATTTGGTCCACCCGTTTCGCGAGTGACGTCATTTTCCCGCGCCCATTTCTCGT  
CACCGCGTGTCCAAAATATTCGAACGCGGCGGAGTTCCTCAGACGAGTGAGTAGGTACGC  
ATGTTTTACCGTAAAAGAGGTTGCAACACAATTAATTGGATAAATATGTGAACTTTCA  
TGCTTTAAATTGTCTTACCTTGCTTTTCGACATGATCTCCACCCAGTTGAACACATTTCT  
GATTATGTGTTAGCAGTTTGTGGATTCCATCTTCAAAAAATTGCGCATATCCTGTCCTTG  
GAACCATTTTTATACAGCTTCTTGCAACTCTGCGTCGGTGGAGAACTTTCGGCCACCCAA  
GCTCTTCTTTAACGCAGGAAAAAGATGAAAATCGCATGGAGTAAGGTCCGGTGACTACGA  
TGGATGAGGAAAAAGGTCCCATTTGAATGAGGCGAACAAGTCTCTTGTCACATGAGCCAC  
ATGAGGCCTTGCGTTGTCTTGAAGGAACAAAACCTTGACGAGACAAAAGATCGGGCCGTTT  
TCGCTTGATCGCTGAATTAAGATTTTTCAAACTTCACAATATCTTGCGGCATCGATCGT  
TTTTCTCTTCCTAAGAAATCGATCAGCAATATTCCTTGAGCAACCCAAAATCCCGGAGC  
CAAAACATGTACTCGTCTGAGGAGCTCCGCTGCGCTCGAATATTTTGGACACGCGGTGAC  
GAGAGATGGGCGCGGGAAAAATGTCGTCACTCGCAAACGGGTGGACAAAATTTAAAAAAC  
GAAGGCTTTTTGAAAAGCTGAGAGTATGACGGTTAAAACACTTTTTACCGTTTTAATTTA  
TCTTCATTAGTTCCGGAGAAAATAAAGATATATACTTACTTTACGAACGCCCTCGTA



--

>Btmar2.11.8\_gi-1092449174-gb-MAMS01002762\_1-:158806-159813  
gi-1092449174-gb-MAMS01002762.1-:158806-159813 Bemisia tabaci isolate MEAM1 Scaffold1944,  
whole genome shotgun sequence 1008 bp

TACGAGAGGCATTTCGTAAAGAAAGGATATATCTTTATTTTCTCCGGAATAATGAAGATA  
AATTAAATCGGTAAAAATTGTTTTACCGCCATACTCTCAGCTTTTCAAAAAGCCTTTGT  
TTTTTAAATTTGGGTTACCGGTACCCGAGTTACGTCAATTTCCCGCGCCCATCTCTCGT  
CACTGCATGTCCAAATATTCGAGCGCGGCGGTGGCGGTGCTCCTCAGACGAGTACATGT  
TTTACCGTAAAGAAGGTTGTGACACAGTTAATTGGTTACATATGTGAACTTTCAGGCT  
TTGAATTGTCTTACCTTACTTTTCGACATAATATCCACCCAGTTAAACACATTTCTGATA  
CCGTGTTAGCAGTTTGCGGATTCCATTTTCAAAAATTGCGCATCCTGTCGTTGGAACGA  
TTTTTTTACAGCTTCTTGCAACTCTGCGTCGGTGGAGAGCTTTTGGCCACTCATAAATTC  
TTCTTTAACGCAAGAAAAAGATGAAAATCGCTTGAAGGAAGGTCCGGTGAGTACAATGGA  
TGAGGAAAAAGGTCCCATTTGAATGAGGCGAACAAGTCTTGAGTCACATGAGCCACATGA  
GGCCTAACGTTGTCTTGAAGGAAAAAACTTGACGAGACAAACGACCGGGCCGTTTTTCGC  
TTGATCGCTGACTCAATTTTTTTTCAAACTTCACAATATCTTGCGGCATCGATCGTTTTT  
CCTCTCTCAAGAAATCGATCAGTAATGTTCTTGAGCGTCCCAAAACACCGTAGCATGT  
ACTCGTCTGAGGAGCTCCGCCGCACTCGAATATTTTGGACACGCAGTGACGAGAGATGGG  
CGCGGGAAAAATGACGTCACTCGCGAACCGGTAAACCAAATTTAAAAAACGAAGGCTTTT  
TGAAAAGCTGAGAGTATGGCGGTAAAAAAATCTTTACCGATTTAATTTATCTTCATTAG  
TTTTGGAGAAAATGAAGATATATACTTGCTTTACGAATGCCCTCGTA

>Btmar2.11.9\_gi-1092454277-gb-MAMS01000420\_1-:3718823-3719831  
gi-1092454277-gb-MAMS01000420.1-:3718823-3719831 Bemisia tabaci isolate MEAM1 Scaffold1063,  
whole genome shotgun sequence 1009 bp

TACGAGGGGCATTTCGTAAAGTAAGTATATATCTTTATTTTCTCCGAAATAATGAGGATA  
AACTAAATCGGTAGACATTGATTTTACCGCCATACTCTCAGCTTTTCAAAAAGCCTTCGT  
TTTTTAAATTTGGTTTACCGGTTTGCAGTGACGTCAATTTTCCCGCGCCCATCTCTCAA  
CACTGCGTGTCCAAATATTCGAGCGCGGCGGTGGCGGTGCTCCTCAGACGAGTACATGT  
TTTACCGTAAAAAAGGTTGTAACACAGTTAATTGGTTACATATGTGAACTTTCAGGCT

TTGAATTGTCTTACCTTACTTTTCGACATAATCTCCACCCAGTTGAACACATTTCTGATA  
CCGAGGTTAGCAGTTCGCGGATTCCATCTTCAAAAAATTGCGCATCCTGTCGTTGGAACC  
ATTTTTTTTACAGCTTCTTGCAACTCTGCGTCGGTGGAGAACTTTGGCCACCCAAGCT  
CTTCTTTAACGCAAGAAAAAGATGAAAATTGCTTGGAGGAAAGTCCGGTGAGTACCGTGG  
ATGAGGAAAAAGGTCCTATTTGAACGAGGCGAACAAGCCTTGAGTCACATGAGCCACATG  
AGGCCTAGCGTTGTCTTGAAGGAGCAACACTTGACGAGACAAAAGACCGGGCCGTTTTCG  
CTTGATCGCTGACTTAATTTTTTTCAAACTTCACAATATCTTGCGGCATCGATCGTTTT  
TCCTCTCTCAAGAAATCGATCAGTAATATTCCTTGAGCGTCCCAAACACCGTAGCATG  
TACTCGTCTGAGGAGCTCCGCCGATTCTGAATATTTTGGACACGCAGTGACGAGAGATGG  
GCGCAGGAAAAATGACGTCACTTGCGAACCGGTAAACCAAATTTAAAAAACGAAGGCTTT  
TTGAAAAGCTGAGAGTATGGCGGTAAAAACAGTGTTTACCGATTAAATTTATTTTCATTA  
GTTTCGGAGAAAATAAAGATATATACTTACTTTACGAATGCCTCTCGTA

--

>Btmar2.11.10\_gi-1092454937-gb-MAMS01000175\_1-:866531-867539

gi-1092454937-gb-MAMS01000175.1-:866531-867539 Bemisia tabaci isolate MEAM1 Scaffold563, whole  
genome shotgun sequence 1009 bp

TACTAGGGGCATTCGTAAAGTAAGTATATATATTTATTTTCTCCGGAATAATGAAGATA  
AATTACATCGGTAAAAATTGTTTTTACCGCCATACTCTCAGCTTTTCAAAAAGCCTTCGT  
TTTTTAAATTTGGGTTACCAAGTACCCGAGTGACGTCAATTTTCCCGCGCCATCTCTCGT  
CACTGCGTGTCCAAAATATTCGAGCGCGGCGGTGGCGGTGCTCCTCAGACGAGTAGATGT  
TTTACCCTAAAGAAGGTTGTGACACAGGTAATTGGTTACACATGTGAACTTTCCGGCT  
TTGAATTGTCTAACCTTACTTTTCGACATAATATCCACCCAGTTAAACACATTTCTGATA  
CCGTGTTAGCAGTTTTCGCGGATTCCATCTTCTAAAAATTGCGCATCCTGTCGTTGGAACGA  
TTTTTTTATAGCTTCTTGCAACTCTGCGTCGGTGGAGAACTTTTGGCCACCCATAAATTC  
TTCTTTAACGCAAGAAAAATATGAAAATCGCTTGGAGGAAGGTCCGGTGAGTACAGTAGA  
TGAGGAAAAAGGTCCCATTTGAATGAGGTAAACAAGTCTTGAGTCACATGAGCCACATGA  
GGCCTAACGTTGTCTTGAAGGAAAAAACTTGACGAGACAAACGACCGGGCCGTTTTTCGC  
TTGATCGCTGACTCAATTTTTTTCAAACTTCACAATATCTTGCGGCATCGATCGTTTTT  
CCTCTCTCAAGAAATCGATCAGTAATATTCCTTGAGCGTCCCAAACACCGTAGCATGT  
ACTCGTCTGAGGAGCTCCGCCGCACTCGAATATTTTGGACACGCAGTGACGAGAGATGGG

CGCGGGAAAAATGACGTCACTCGCGAACCGGTAAACTAAATTTAAAAAACGAAGGCTTTT  
TGAAAAGCTGAGAGTATGGTGGTAAAAAAAATCTTTACCGATTTAATTTATCTTCATTA  
GTTTTGGAGAAAATGAAGATGTATACTTACTTTACGAATGCCCCCTCGTA

--

>Btmar2.11.11\_gi-1092455206-gb-MAMS01000099\_1-:748959-749958  
gi-1092455206-gb-MAMS01000099.1-:748959-749958 Bemisia tabaci isolate MEAM1 Scaffold328, whole  
genome shotgun sequence 1000 bp

TACGAGGGGCGTTCGTGAAGTAAGTATATATCTTTATTTTCTCCAAAATAATGAAGATA  
ATTTAAACGGTGAAAATTGTTTTACCGTCATACTCTCAGCTTTTCAAAAAGCCTTCGT  
TTTTAAATTTGGTTTACTGGTTCGCGAGTGACATCATTTTTCCCGCGCCCATCTCTCTT  
CAGCGCGTGTCCAAAATATTCGAGCGCGGCCAAGCTCCTGAGACGAGTACATGCTCTCAC  
CATAAAGAAGCTTATAACACAGTTAATTGGTTAAATATGTGAAAATTTAGGCTTTGAAT  
TGTCTTACCTTACTTTTCGACATAATCTCCACCCAGTTGAACACATTTCTGATACCGTGT  
CAGCAGTTTGTGGATTCAATCTTTAACAAATTGTGCATCCTGTAGTTGGAACCTTTTTTT  
AACAGGTTCTTGCAATTCTGCATCGGTGGAGAACTTTGGCCAACCAAGCTCTTCTTTAA  
TGCAGGAAAAATATGAAAATTGCTTGGAGCAAGGTCCGGTGAGTACGGTGGATGAGGAAA  
AAAGTTAATATTTGATTGAGGGGAACAACCTCTTAAGTCACATGAGCCACATGAGGTTGTC  
ATGAGGGAACAAAATTTGACGAGACAAAAGAGCGGGCCGTTTTTCGCTTGATCGCTAACTT  
AAGATTTTTCAAACTTCACAATATCTTGCGGCATCGATCGTTTTTCCTCCTTCCAAGAA  
ATCGATCAGCAATATTCCTTGAGCGTCCCAAAACACCGTAGCCAAAACATGTACTTGTCT  
GAGGTGCTCCGCCGCGCTCGAATATTTGAACACGCTGTGACGAGAGATGGACGCGGGAA  
AACTGACATCACTTGCGAACCGGTAAACCAAATTTAAAAAACGAAGGCTTTTTGAAAAGC  
TGCGAGTATAACGGTAAAAATAGTTTTACCGTTTTAATTTATCTTCATTAGTTTTGAAG  
AAAATAAAAATATATACTTACTTTACGAATGCCCCCTCGTA

>Btmar2.11.12\_gi-1092445159-gb-MAMS01004474\_1-:72745-73637  
gi-1092445159-gb-MAMS01004474.1-:72745-73637 Bemisia tabaci isolate MEAM1 Scaffold26367, whole  
genome shotgun sequence 893 bp

TACGAGGGGCGTTCGTAAAGTAAGTATATATCTTTATTTTCTCCGGAATAATGAAGATA  
AATTTAAACGGTAAAAAGTGTTTTAACCGTCATACTCTCAGCTTTTCAAAAAGCCTTCGT

TTTTTAAATTTGGTTCACCCGTTGCGGAGTGACGTCATTTTTCCCGCGCCCATCTCTCGT  
CACCGCGTGTCCAAAATATTCGAACGCGGCGGAGTTCCTCAGGCGAGTGAGTACGCACGT  
TTCACTTTAAAAAAGGTTGTAACACCATTAATCGGATAAATATGTGAACTTTTAGGCT  
TTGAATTGTCTTACCTTGCTTTTCGACATGATCTCCACCCAGTTGAACACATTTCTGATT  
ATATGTTAGCAGTTTGTGGATTCAATCTTCAAAAAATAGCGCATATCCTGTCGTTGGAAC  
CATTTTTTTACAGCTTCTTGAAACTCTGCGTCGGTGGAGAACTTTCGGCTATCCAAGCTC  
TTCTTTAACGCAGGAAAAAGATGAAAATCGCATGGAGCAAGGTTTCGGTGAGTACGATGGA  
TGAGGAAAAAGGCCCCATTTGAATGAGGCGAACAAGTCTCTAGTCACATAAGCCACATGA  
GGCCTAGCGTTGTCTTGAAGGAACACAACCTTGACGAGACAAAAGATCGGGCCGTTTTCGC  
TTGATCGCTGAAGTAAGTTTTTTTCAAACTTCACAATATTTTGCGGCATCGATCGTTTT  
TCCTCTTCCTAAGAAATCGATCAGCAATATTCCTTGAGCGACCCAAAATCCCGGAGCCAA  
AACATGTACTCGTCTGAGGAGCTCCGCCGCGCTCGAATATTTTGGACACGCGGTGACGAA  
AGATGGGCGCGGGAAAAATGACGTCACTCGCGAACGGGTGAACCAAATTTAAA

>Btmar2.11.13\_gi-1092453732-gb-MAMS01000665\_1-:1165384-1166120  
gi-1092453732-gb-MAMS01000665.1-:1165384-1166120 Bemisia tabaci isolate MEAM1 Scaffold1145,  
whole genome shotgun sequence 737 bp

ATTGGTCAAATATATGAACTTTCAGGCTTTGAATTGTCTTACTTTTACTTTCCGACAAA  
ATCTCCACCCAGTTGAACACATTTCTGATACCGTGTTAGCAGTTTGCGAATTCCATGTTA  
AAAAAATCGCGCATCCTGTCGTTGCAACCATTTTTTTACGGCTTCTTTGCAACTCTGCGT  
CGGTGGAGAACTTTTGGTCGACCAAGCTCTCCTTTAACGCAAGAAAAAGATTTTGAGGAA  
GGTCCGGTGAGTACGGTGGATGAGGATAAAGGTCCTATTTGAATGAGGCGAACGAGTCTT  
GAGTCACTTCATGAGCCACATGAGGCCTAGCGTTGTCTTGAAGGAACGAACTTGACGAG  
ACTAAAGACCGGGCTGTTTTGCTTGATCGCTAACTAATTTTTTTGAAAACCTCACAATA  
TCTTGCGGCATCGATCGTTTTTCCTCTCTCCAAGAAATTGATCAGTAATATTCTTTGAGC  
GTCCCAAACACCGTAGCATGTACTCGTCTGAGGAGCTCCGCCGCACTCCAATATTTTGG  
ACACGCAGTGACGACTGACGAGAGATGGGCGCGGGAAAAATGACGTCACTCGCGAACCGG  
TAAACCAAATTTAAAAGACGAAGGCTTTTTGAAAAGCTGAGAGTATGACGGTAAAAATAG  
TTTTTACCGATTTAATTTATCTTCATTAGTTTCGGAGAAAATAAAGATATATACTTACCT  
TACGAATGCCCTCGTA

>Btmar2.12.1\_gi-1092446696-gb-MAMS01003835\_1-:550825-551567  
gi-1092446696-gb-MAMS01003835.1-:550825-551567 Bemisia tabaci isolate MEAM1 Scaffold2366,  
whole genome shotgun sequence 743 bp

TACGAGGGGCATTCGTAAAGTAAGTATATATCTTTATTTTCTCCAAACTAATGAAGATA  
AATTAACCGGTAAAAATTGTTTTACCGTCAGCTTTTTGCAAATCCTTGTTTTTAA  
TTTGTTTTACCGGTTTCGCGAGTGACGTCATTTTTCTCGCGCCATCTCTCGTCACCGCAT  
GTCCAAATATTTGAGCGCGGCGAAGCTCCTCAGAGGAGTACATGCTCTCACCGTAAAGA  
AGCTTGTAACACAAATAATTGGTTTATTATGTGGAAATTCAGGCTTTGAATTGTCTTAC  
CTTACTTTTCGACATAATCTCCACCTAGTTGGACACATTTCTGATACCGTGTTAGCAGTT  
TGTGAATTCAATCTTCAAAAAATTGCGCATCCTGTAGTTGGAACCATTTTTTAACAGGTT  
CTTGCAACTCTGCGTGGGTGGAGAACTTTGGCCAATCAAGCTCTTCTTTAACGCAGGAA  
AAATATGAAAATCGTTTGGAGCAAGGTCCGGTGAGTACGGTGGATGAGGAAAAAGGTCCC  
ATTGAATGAGGCAACAACCTTTGAGTGACATGAGCCACATGAGGCCTAGCGTTGTCATG  
AAGGAACAAAATTTGACGAGACAAAAGACCGGGCCGTTTTCGCTTGATCGTGACTTAAG  
ATTTTCAAACTTCACAATATCTTGCGGCATCGATCATTTTTCTCTTTCCAAGAAATC  
GATCAGCAATATTCCTTGAGCGC

--

>Btmar2.12.2\_gi-1092426883-gb-MAMS01018655\_1-:100497-101301  
gi-1092426883-gb-MAMS01018655.1-:100497-101301 Bemisia tabaci isolate MEAM1 Scaffold8852,  
whole genome shotgun sequence 805 bp

TACGAAGGGCATTCGTAAAGTAAGTATATAGCTTTATTTTCTCCGAAACTAATAAAGATA  
AATTAAATCGGTAAACATTTTTTTTACCGCCATACTTTCAGCTTTTCAAAAAGCCTTCGT  
TTTTTAAATTTGGTTCACCGGTTTGCGAGTGACGTCATTTTTCCCGCGCCCATCTCTCGT  
CACTGCGTGTCCAAATTTTCGAGCGTGGTGGTGGCGGTGCTCCTCAGACGAGTACATGT  
TTTCACCGTAAAGAAGGTTGTAACACAGTTAATTGGTTAAATATGTGAACTTTCAGGCT  
TTGAATTGTCTTACCTTACTTTTCGACATAATCTCCACCCAGTTGAACACATTTTCGGATA  
CTGTGTTAGCAGTTAGCGGATTCCATCTTCAAAAAATTGCGCATCCTGCAGTCGTTGGAA  
CCATTTTTTTACAGCTTCTTGCAACTCTGCGTCGGTAAAGAAATTTGGCCACCCAAGCTC  
TTCTTTAACGCAAGAAAAAGATGAAAATCGCTTGGAGGAAGGTCAGGTGAGTACGGTGGA

TGAGGGAAAAGGTCCCATTGAATGAAGCGAACAAGTCTTGAGTCACATGAGCCACATGA  
GGTTGTCTTGAAGGAACAAAACCTTGACGAGACAAAAGACCGGGCCGTTTTTCGCTTGATCG  
CTGACTTAATTTTTTTCAAAACTTCAGAATGTCTTGCGGCATTCATCGTTTTTCCGCTCT  
CCAAGAAATCGATCAGTAATATCCCTTGAGCGTCCCATAACACCGTAGCATGTACTCGTC  
TGAGGAGCTCCGCCGCACTCAAATA

--

>Btmar2.12.3\_gi-1092428455-gb-MAMS01017083\_1-:5459-6271  
gi-1092428455-gb-MAMS01017083.1-:5459-6271 Bemisia tabaci isolate MEAM1 Scaffold812, whole  
genome shotgun sequence 813 bp

CACCGCGTGTCCAGAATATTCGAGCGCGGCGAAGCTCCTCAGATGAGTACATGCTCTCAC  
CATAAAGAAGCTTGTAACACAGTTAAATATGTGAAAATTCAGGCTTTGAATTATCTTAC  
CTTACTTTTCGACATAATCTCTACCCAGTTGAACACATTTCTTATACCGTGTTAGTAGTT  
TGTGGATTCAATCTTCAAAAAATTGCGCATCCTGTAGTTGAAACTATTTTTTAACAGGTT  
CTTGCAACTATGCGTCGGTGGAGAACTTTGGCCAACCAAGGTCTTCTTTAACACAGGAA  
AAATATGAAAATCGCTTGGAGCAAGGTCCGGCGAGTACAGTGGATGAGAAAAAAGGTCCC  
ATATGAATGAGGCGACAAGTCTTGAGTCATATGAGCCACATGAGGCCCAGCATTGTCATG  
AAGGAACGAAACTCGACGAGACGAAAGACCGGGCTGTGCATGATCGCTGACTTAAGTTTT  
TTCAAAACTTCACAATATCTTGCGGCATCAATCGTTTTTCCTCTTTCCAAGAAATCGATC  
AGCAATATTCCTTGAGAGTCCCAAAACACCGTAGCCAAAACATGTACTTGTCTGAGGAGC  
TCCGCCGCGCTCGAATATTTTTGACACGTGGTGACGAGAGATGGGCGTGGGAAAAATGAT  
GTCACCTGCAAACCGGTAAACCAAATTTAAAAAACGAAGGCTTTTTGAAAAGCTGAGAGT  
ATGGCGGTAAAAACAATCTTTACCGATTTAATTTATCTTCATTAGTTTTGGAGAAAATAA  
AGATATATACATACTTTATGAATGCCCCCTCGTA

--

>Btmar2.12.4\_gi-1092454709-gb-MAMS01000236\_1-:1874628-1875621  
gi-1092454709-gb-MAMS01000236.1-:1874628-1875621 Bemisia tabaci isolate MEAM1 Scaffold707,  
whole genome shotgun sequence 994 bp

TACGAGAGGCATTTCATAAAGTAAGTATATATCCTTATTTTCTCCGAACTAATGAAGGTA  
AATTAAATCGGTAAAAATTGTTTTACCGCCATACTCTCAGCTTTTCAAAAAGCCTTCGT  
TTTTTAAATTTGGTTCACCGGTCGCGAGTGACGTCATTTTTTCCGCGCCCATCTCTTGT  
CACTGCGTGTCCAAAATATTCGAGCGTGGTGGTGGCGGTGCTCCTCAGACGAGTACATGT  
TTTCACCGTAAAGAAGGTTGTAACACAGTTAATTGGTTAAATAAACTTTCAGGCTTTGAA  
TTGTCTTACCTTACTTTTCGACATAGTCTCCACCCAGTTGAACACATTTCTGATACCGTG  
TTAGCAGTTTGCGGATTCTATCTCCAAAAAATTGCGCATCCTGCAGTCGTTGGAACCATT  
TTTTTACAGCTTCTTGCAACTCTGCGTCGGTAGAGAAATTTGGCCACCCAATCTCTTCTT  
TAACGCAAGAAAAAGATGAAAGTCGCTTGAGGAAGGCCAGGTGAGTACGGTGGATGAGG  
GAAAAGGTCCCATTTGAATGAGGCGAACAAGTCTTGAGTCACATGAGCCACATGAGGTTG  
TCTTGAAGTAACAAAACCTTGACGAGACAAAAGACCGGGCCGTTTTTCGCCTGATCGCTGAC  
TTAATTTTTTTCAAACTTCACAATATCTTGCGGCATTCATCGTTTTTCCGCTCTCCAAC  
AAATAGATCAGTAATATTCTTGAGCGTCCCAAAACACCGTAGCATGTACTCGTCTGAGG  
AGCTCCGCCGCACTCGAATATTTTGGACACGCAGTGACGAGAGATGGGCGTGGGAAGAAT  
AACGTCACTCGCGAACCGGTGAACCAAATTGAAAAACAAAGGCTTTTTGAAAAGCTGAG  
AGTATAGCGGTAAAAACAATTTTACCAATTTAATTTATCTTCATTAGTTTGAAGAAAA  
TATATATATACTAACTTTACGAATGCCCTCGTA

--

>Btmar2.12.5\*\_gi-1092450538-gb-MAMS01002165\_1-:170088-171083  
gi-1092450538-gb-MAMS01002165.1-:170088-171083 Bemisia tabaci isolate MEAM1 Scaffold1714,  
whole genome shotgun sequence 996 bp

TATGAGGGGCATTTGTAAAGTAAGTATATATCTTTATTTTCTCCGAACTAATGAAGATA  
AATTAACGTTAAAAATTGTTTTACCGTCATAATCTCAGCTTTTCAAAAAGCCTTTTT  
TTTAAATTTGGTTTACCGGTCGCGAGTGACGTCATTCTCCGCGCCCATCTCTCGTCA  
CCGCGTGTCCAAAATATTCGAGCACGGCGAAGCTCCTCAGACGGGTACATGTTCTCACCG  
TAAGGAAGCTTGTAACATAGTTAATTGGTTAAATATGTGAAAATTCAGGCTTTGAATTG  
TCTTACCGTACTTTTCGACATAATCTCTACCCAGTTGTACACATTTCTGATACCGTATTA  
GCAGTTTGTGGATTCAATCTTCAAAAAATTGCGCATCCTGTAGTTGGAACCATTTCTTAA  
CAGGTTCTTGCAACTCTGCGTGGGTGGAGAACTTTGGCCAACCAAGCTCTTGTTTAACC

CAGGAAAAATATGAAAATCGCTTGGAGCAAGATCCGGTGAGTATGGTGGATGAAGAAAAA  
GGTCCCATTGAATGGGGCAAACAACTCTTGAGTCACATGAGCCACATGAGGCCTAGCGT  
TGTCATGAAGGAACAACATTGACGAGATAAAAGACCGGGCCGTTTTCGCTTGATTGCTGA  
CTTAAGATTTTTCAAACTTCACAATATCATGCGGCATCGATCGTTTTACTTTTTCTTT  
TTTCCAAGAAATCGATCAGCAATATTCCTTGAGCGTCCCAAACATGTACTCGTCTGAGG  
AGCTCCGCCGCGCTCGAATATTCCGGACACGCAGTGATGAGAGATGGGCGCGGGAAAAAT  
GATGTCACTTGCAAACCGGTAAACCAAATTTATAAAACGAAGGCTTTTAGAAAAGCTGAG  
AATATGGTGGTAAAAACAATTTTTACCGATTAAATTTATCTTCATTAGTTTTGGAGAAAA  
TAAAGATGTATACTTACTTTACAAATGCCCCCTCGTA

>Btmar2.13.1\_gi-1092455496-gb-MAMS01000029\_1-:7050987-7051972  
gi-1092455496-gb-MAMS01000029.1-:7050987-7051972 Bemisia tabaci isolate MEAM1 Scaffold165,  
whole genome shotgun sequence 986 bp

TACGAGGGGCGTTCGTAAAGTAAGTATATATCTTTACTATCTCCGAACTAATGAAGATA  
AATTAAATCGGTAAAAATTGTTTTACCGCCATACTCTCAGCTTTTCAAAAAGCCTTTGG  
TTCCTGTTTCGCGAGTGACGTCATTTTTCCCGCGCCACCTCTCGTCACTGCGTGTCCA  
AAATATTCGAGTGCGGCGGAAGTCCTCAGACGGGTACATGCTACGGTGTTTGGGGACGCT  
CAAGGAATATTACTGATTGATTTCTTGGAGAGAGGAAAAACGATCGATGCCGCAAGATAT  
TGTGAAGTTTTGAAAAAATTAAGTCAGCGATCAAGCGAAAACGGCCCGTCTTTAGTCT  
CGTCAAGTTTTATCCTTCAAGACAACGCTAGGCCTCATGTGGCTCATGTGACTCAAGAC  
TTGTTGCGCTCATCCAAATGGGACCTTTTTTCTCATCCACCGTACTACCGGACTTTCTT  
CCAAGCGATTTTCATCTTTTTCTTGCGTAAAGATGAGCTTGAGTGGCCAAGAGTTCTTC  
ACCGACGCAGAGTTGCAGTAAAAAATGGTTCCAGCGACAGGATGCGGAATTTTTTGAAG  
ATGGAATCTCCAACTGCTAACACAGTATCAGAAATGTGTTCAACTGGGTGGAGATTATG  
TCGAAAAGTAAGGTAAGACAATTCAAAGACTGAAAGTTTCACATATTTAACCAATTAAT  
GTGTTACAACCTTCTTTACGGTGAAAACATGTGCTCGTCTGAGGAGAACAGCCTCTGCCG  
CGCTCGAATATTTTGGACACGCAGTGACGAGAGATAGGCGCGGGAAAAATGACGTCACTC  
GCGAACCGGTAAACCAAATTTAAAAAACGAAGGCTTTTTGAAAAGCTGAGAGTATGGCGG  
TAAAAACAATTTTTACCGATTAAATTTATCTTCATTAGTTTTGGAGAAAAATAAAGATATA  
TACTTACTTTACGAATGCCCCCTCGTA



>Btmar2.13.2\_gi-1092455496-gb-MAMS01000029\_1-:1140892-1141880  
gi-1092455496-gb-MAMS01000029.1-:1140892-1141880 Bemisia tabaci isolate MEAM1 Scaffold165,  
whole genome shotgun sequence 989 bp

TACGAGGGGCATTCGTAAAGTAAGTATATATCTTTACTTTCTCCGAAACTAATAAAGATA  
AATTAAATCGGTAAAAATTGTTTTACCGCCATATTCTCAGCTTTTCAAAAAGCCTTTGT  
TTTTTAAATTTGGTTTACTGGTTCGCGAGTGACGTCATTTTCCCGCGCCCATCACTCGT  
CCCTGCGTGTCCAAAATATTCGAAAGCGGCGGAGCTCCTCAGACGAGTACATGCTACGGT  
GTTTTGGGACGCTCATCGTCATATTACTGATCGATTTCTTGGAGAGAGGAAAAGCGATAG  
ATGCCGCAAGATATTATGAAGTTTTGAAAAAATTAAGTCAGCGATCAAGCGAAAAGTACC  
CGGTCTTTTGTCTCGTCAAGTTTTGTTTCTTCAACACAACGCTAGGCCTCATGTGGCTCA  
AGTGACTCAAGACTTGTTGCGCTCATTCAAATGGGACTTTTTTCTCATCCACCGTACTC  
ACCGGACCTTCTCCAAGCGGTTTTATCTTTTCTTGCGTTAAAGGAGATCTTGGGTGG  
TCAAAAGTTCTCCACCGACGCAGAGTTGCAAGAAGCTGTAAAAAATGGTTCCAACGATA  
GGATGCGTAATTTTTTGAAGATGGAATCCGCAAAGTCTAACACGGTATCAGAAATGTGC  
TCAACCGGGTGGAGATTACGTCAAACAGTAAGGTAAGACAATTCAAAGCCTGAAAGTTCC  
ACATATTTAACCAATTAAGTGTGTTACAACCTTCTTTACGGTGAAAACATGTACTCGTCT  
GAGGAGCACCGTCACCGCCGCGCTCGAATATTTGGACACGCAGTGACGAGAGATGGGCG  
CGGGAAAAATGACGTCACTCGCGAACCAGTAAACCAAAGTAAAAACGAAGGCTTTTAA  
ATCGGTAAAAATTATTTTTACCGATTTAATTTATCTTTATTAGTTTCGGAGAAAATAAAG  
ACATATACTTACTTTACGAATGCCCTCG

--

>Btmar2.13.3\*\_gi-1092455225-gb-MAMS01000096\_1-:1720384-1721383  
gi-1092455225-gb-MAMS01000096.1-:1720384-1721383 Bemisia tabaci isolate MEAM1 Scaffold322,  
whole genome shotgun sequence 1000 bp

TACGAGGGGCATTCGTAAAGTAAGTATATATCTTTATTTTCTCCAAACTAATAAAGATA  
AATTAAATCGGTAAAAATTGTTTTACCAACATACTCTCAGCTTTTCAAAAAGCCTTCTT  
TTCAAATTTGGTTTACCGTTTGCAAGTGGCGTCATTTTCTCGCGCCCATCCCTTGTC  
CCGCGTGTCCAAAATATTCGAGCGCGGAGAGCTCCTCAGACGAGTACATGTTTTGGCTA  
CGGTGTTTTGGGACGCTCAAGGAATATTGCTGATCGATTTCTTGAAAAGAGGAAAAACGA  
TTGATGCCGCAAGATATTGTGAAGTTTTGAAAAAAGTAAAGTCAGCGATCAAGCAAAAAC

GGCCCGGTCTTTTGTCTCGTCAAGTTTTGTTCCCTCAAGACAATGTAGGCCTCATAAGGC  
TCATGTGACTCAAGACTTGTTGCCTCATTCAAATGGGACCTTCTTCCTCATCCACCGTA  
GTCACAGGACCTTGCTCCAAGCGATTTTCATATTTTCTGCGTTAAAGCAGAGCTTGGT  
TGGCCAAAAGTTCTCCACCGACGCAGAGTTGCAAGAACCTGTAAAAAATGGTTCCAAC  
ACAGGATGCGCAATTTTTTTGAAGATTGAATCCACAACTGCTAACATGGTATCAGAAAT  
GTGTTCAACTGGGTGGAGATTAAGTCGAAAAGTAAGGTAAGACAACTCAGAGCCTGAAAT  
TTTCACATATTTAACCAATTAACCTACAAGTTTCTTTATGGTAAGAGTATGTACTCGTCT  
TAGGAGCTTCGCCGCGCTCGAATATTTGGACTCGCAGTGACGAGAGATGGGGGTGGGAA  
AAATGACGTCACTCGCAAACCTGGTAAACCAAATTTAAAAACGAAGGCTCTTTGAAAAGC  
TGAGAGTATGATGGTAAAAACAAATTTACCGTTTTAATTTATCTTTATTAGTTTCGGAG  
AAAATAAAGACATATACTTACTTTACGAATGCCCTTGTA

>Btmar2.14.1\*\_gi-1092446696-gb-MAMS01003835\_1-:2662928-2663500  
gi-1092446696-gb-MAMS01003835.1-:2662928-2663500 Bemisia tabaci isolate MEAM1 Scaffold2366,  
whole genome shotgun sequence 573 bp

GTCTTCGATACGAATCTTCGTCCGCGAAGCTCCTTTTAAGCGTAGGAAACATCCAAAAA  
TCACATGGAGCCAAGTCAGGGCTATAAGGGGGATGAGGGATTGTTTCAACTCCATTTT  
CTCATAAAGTCACGTGTTAAGCTCGATGTGTGAGGCCGCGCATTGTCTTGATGGAGTATC  
CACGAAGCTTTCAAGTCCGACCGTTTCCGGGAAATGTGCATTCTCAACTCCTTTAGTACT  
TTGCAATAATACGCACTGTCAACTGTTGTGTTTGATGGTACAAAATGTTGATAAATGACA  
CCTCGAAAATAAAAAACACAATAAGCATCACTTTATTGGCCGACTTTTCGATTTACGAC  
GATGAAGAATCTTCCTTAAAAACCGTAGGCGTAACTTTCCTCGCTGATTTCAAATTGCC  
ATAACTCGGTCAATTTTATCCGATTGAGCTGATCTTGATTTAATCGATGGGTATTGAG  
TTGATCTTTAAAATGAAATCAAGATCATGTCTGTATCTGTCTTACTTTGAAGTTACAGA  
ACAAGTCCCGGTGCTTTTGGGACACCTTATGTA

--

>Btmar2.14.2\_gi-1092438832-gb-MAMS01007481\_1-:265927-266470  
gi-1092438832-gb-MAMS01007481.1-:265927-266470 Bemisia tabaci isolate MEAM1 Scaffold3891,  
whole genome shotgun sequence 544 bp

TCCTTTTAAAGCGTAGGAAACATCCAAAATCACATGGAGCCAAGTCAGGGCTGTAAGGG

GGATGAGGGATTGTTTCAACTCCATTTTTACTCATAAATTCACGTGTTAAGCTCGATGTG  
TCAGGTCGCGCATTGTCTTGATGGAGTATCCACGAAGCTTCAAGTCCGACCGTTCCGG  
GAAATGTGCATTCTCAAGTCCTTAGCACTTTGCAATTATACGCACTGTCAACTGTTGTG  
TTTGGTGGTACAAAATGTTGATAAATGACACCTCGGAAATGAAAAAACACAATAACCAT  
CACTTTATCGGCCGACTTTTCGATTACGGCGATGAAGAATCTTCCTTAAAAACCGTAGG  
CGTAACTTTCCTAGCTGATTCAAATTGCCATAACTCGGTCCATTTTTATCCGATTGAG  
CTGATCTTGGTTTTAATCGATAGGTATTGAGTTGATCTTTAAATGAGATCAAGATCATG  
TCTGTATCCATCTTACTTTCGAAGTTACAGAACAAGTCCCGGTGCTTTTGGGACACCTTA  
TGTA

>Btmar2.15.1\*\_gi-1092450672-gb-MAMS01002091\_1:4268924-4269482  
gi-1092450672-gb-MAMS01002091.1:4268924-4269482 Bemisia tabaci isolate MEAM1 Scaffold1685,  
whole genome shotgun sequence 559 bp

TACGTAGGGTGTCCCAAAGTACCGGGACTGGTTCTGTAACCTCAAATTAAGATAGATA  
CAGACATGATTTTGGTCTCATTTTAAAGATCAACTCAATACCTATCGATTAACCAAGA  
TCAGCTCAATCGAATAAAAATTGACCGAGTTATGACAATTTGAAATTAGTGAGGAAAGTT  
TACCCCTACGGTTTTTAGGAAGATTTTCGCTTACCAGGATTTAAAAAGTTAATATTCGT  
ATCCACTTTCCTCCGAATCTTCATAACTTCCTTTTGCTTTTCAAAGTACCGTCCATCAA  
ACCGGATGCACTTTTTCATGCGCTCTGCCACTTATCCAACATTGTTTCTGAATTATT  
CCTCTGGGATGGAGTTGAAGAAGTTTTGAATTGCATTCTGGATTTCGGTCTTCGATACGA  
ATCTTCGTCCGCGAAGCTCCTTTTAAAGCGTGGGAAACATCCAAAAATTACATGGAGCCA  
AGTCAGCGCTATAAGGGGGATGAGGGATTGTTTCAACTCCATTTTTACTCATAAATTCAC  
GTGTTAAGCTCGATGTGTG

>Btmar2.15.2\_gi-1092450672-gb-MAMS01002091\_1:32685-33211  
gi-1092450672-gb-MAMS01002091.1:32685-33211 Bemisia tabaci isolate MEAM1 Scaffold1685, whole  
genome shotgun sequence 527 bp

TACGTAGGGTGTCCCAAAGTACCGGGACTGGTTCTGTAACCTCAAAGTAAGATAGATA  
CAGACATGATTTTGGTCTCATTTTAAAGATCAACTCAATACCTATCGATTAACCAAGA  
TCAGCTCAATCGAATAAAAATTGACCGAGTCATGACAATTTGAAATTAGTGAGGAAAGTT  
TACCCCTACGGTTTTTAGGAAGATTTTCGCTTACCAGGATTCAAAAAGTTAATATTCGT  
ATCCACTTTCCTCCGAATCTTCATAACTTCCTTTTGCTTTTCAAAGTACCGTCCATCAA

ACCGGATGCACTTTTTCATGCGCTCTTCCACTTATCCAACATTGTTTTCTGAATTCTT  
CCTCTGGGATGGCGTTGAAAAAGTTTTGAATTGCATTCTGGATTTCGGTCTTCGATTCTGA  
ATCTTCGTCCGCGAAGCTTCTTTTTAAGCGTAGGAAACATCCAAAAATCACATGGAGCCA  
AGTCAGGGCTGTAAGGGGGATGAGGGATTGTTCAACTCCATTTTTA

>Btmar2.16.1\_gi-1092444632-gb-MAMS01004733\_1-:38483-39010  
gi-1092444632-gb-MAMS01004733.1-:38483-39010 Bemisia tabaci isolate MEAM1 Scaffold2737, whole  
genome shotgun sequence 528 bp

GTAAAAATGGAGTTAAAACAATCCCTCATCCCCCTTATAGCCCTGACTTGGCTCCATGTG  
ATTTTTGGATGCTTCCTACGCTTAAAAAGGAGCTTCGCGGACGAAGATTCGTATCGAAGA  
CCGAAATCCAGAATGCAATTCAAACTTCTTCAACTCCATCCCAGAGGAAGAATTCAGGA  
AAACAATGTTGGATAAGTGGCAAGAGCGCATGAAAAAGTGCATCCGGTTTGATGGACGGT  
ACTTTGAAAAGCAAAAGGAAGTTATGGAAGATACGGAGGAAAGTGGATACGAATACTAAC  
TTTTTGAATCCTGGTAAGCAAAAATCTTCCTAAAAACCGTAGGGGTAACTTTCCTCAC  
TAATTTCAAATTGTCATAACTCGGTCAATTTTTATTTCGATTGAGCTGATCTTGGTTTTAA  
TCGATAGGTATTAAGTTGATCTTTAAATGAGACCAAAATCATGTCTGTATCTATCTTAC  
TTTTGAAGTTACAGAACCAGTCCCGGTACTTTTGGGACACCCTGCGTA

--

>Btmar2.16.2\*\_gi-1092454801-gb-MAMS01000208\_1-:668786-669319  
gi-1092454801-gb-MAMS01000208.1-:668786-669319 Bemisia tabaci isolate MEAM1 Scaffold649, whole  
genome shotgun sequence 534 bp

TTATGAGTAAAAATGGAGTTGAAACAATCCCTCATCCCCCTAATAGCGCTGACTTGGCTC  
CATGTGATTTTTGGATGTTTCCACGCTTAAAAAGGAGCTTCGCGGACGAAGATTCGTAT  
CGAAGACCGAAATCCAAAATGCAATTCAAACTTCTTCAACTCCATCCCAGAGGAAGAAT  
TCAGGAAAACAATGTTGGATAAGTGGCAAGAGCGCATGAAAAAGTGCATACGGTTTGATG  
GACGGTACTTTGAAAAGCAAAAGGAAATTATGGAAGATTTCGGAGGAAAGTGGATACGAAT  
ATTAATTTTTGAATCCTGGTAAGCGAAAAATCTTCCTAAAAACCGTAGGGGTAACTTT  
CCTCACTAATTTCAAATTGTCATAACTCGGTCAATTTTTATTTCGATTGAGCTGATCTTGG  
TTTTAATCGATAGGTATTGAGTTGATCTTTAAATGAGACCAAAATCATGTCTGTATCTA  
TCTTACTTTTGAAGTTACAGAACCAGTCCCGGTACTTTTGGGACACCCTACGTA
