# Supplementary material
Source: publisher figshare collection journal article supplement (https://gsajournals.figshare.com/articles/dataset/_/15001164)
Supplement: Supplementary file 6 [file 1]

**Table S4** SRA data analysis of the expression of the two complete MLEs (Btmar1.1 et Btmar2.1) while feeding on tomato infected with the Tomato yellow leaf curl virus (TYLCV)

| Project accession: PRJNA312467 |                 |                                                                                     |                    |                    |
|--------------------------------|-----------------|-------------------------------------------------------------------------------------|--------------------|--------------------|
| SRA-runs                       | SRA-experiments | Conditions                                                                          | FPKM<br>(Btmar1.1) | FPKM<br>(Btmar2.1) |
| SRR3179624                     | SRX1592828      | adult whiteflies MEAM1 fed with non-infected tomato plants for 24 h (TYLCV control) | 5204.184082        | 54.507038          |
| SRR3179628                     | SRX1592843      | adult whiteflies MEAM1 fed with non-infected tomato plants for 48 h (TYLCV control) | 9095.962891        | 15.964408          |
| SRR3179632                     | SRX1593125      | adult whiteflies MEAM1 fed with non-infected tomato plants for 72 h (TYLCV control) | 6753.282715        | 57.599396          |
| SRR3179639                     | SRX1593132      | adult whiteflies MEAM1 fed with TYLCV-infected tomato plants for 24 h               | 6586.111328        | 56.656368          |
| SRR3179644                     | SRX1593138      | adult whiteflies MEAM1 fed with TYLCV-infected tomato plants for 48 h               | 4498.195801        | 85.146233          |
| SRR3179952                     | SRX1593145      | adult whiteflies MEAM1 fed with TYLCV-infected tomato plants for 72 h               | 6327.583008        | 47.316063          |
