# Supplementary material
Source: publisher figshare collection journal article supplement (https://gsajournals.figshare.com/articles/dataset/_/15001164)
Supplement: Supplementary file 7 [file 1]

<sup>1</sup>TACGAGGGGCGTTCAATGAGTAAGTATCCCCCCCCCTCTAAAATCTATAAAAATGGACCA 60  
 ATTTTAAAAACTTGGGCTTAAAAATCTTCCTTAGGATATTC TGAGCTCAACAAAACAAAC 120  
 CGCACTAAAAATCGGACCATTTGCGGCCGAACGCGAGCCGTTTGAACGCGCCGAAGCGCTC 180  
 GCCGCTCCCGCCGAATCTGC TAGCAATCGCAGCTTGGTGTTCAGTTATCACCTTTCTGAG 240  
 GTAGTGATTTGGATCCTCTCTGCGAGTGGATCACACAATCTGTATTAATCATAAAATCAC 300  
 GGTGCATACAGATAACAAGATAACATGAAAAACGCGTTGATAATAATGCCGTGGCATCAT 360  
 M E L  
 GAGTTCGAAAAACAATCAGTCTAGTGGCAGCGTTTTTTTTCACGTGTGCATCATGGAGTTA 420  
 P L Q I V Q D C E I R A V I R F L S A E  
 CCGCTTCAAATTGTTT CAGGATTGTGAAATTCGCGCAGTTATTTCGGTTTTTTAAGTGC GGAA 480  
 G K T G N A I H R K L V A V Y G A T C M  
 Helix-Turn-Helix  
 GGGAAAACCGGCAATGCTATCCATCGAAAACTGGTCGCCGTATACGGTGCAACATGTATG 540  
 T V C M V R R W V D Q F K K G R A D I H  
 Bipartite nuclear localization signal  
 ACTGTGTGTATGGTGGCGCAGATGGGTTGATCAATTCAAAAAAGTTCGCGCGGATATCCAC 600  
 D L Q R S G R P C E A I T D D A V E S V  
 GATCTGCAACGCTCGGGTCTGTCATGTGAAGCCATCACCGACGATGCAGTCGAATCAGTT 660  
 E A A V I E D N R R V K E M K R L L R  
 GAAGCCGTGATTGAGGACAATCGTCGGGTAAAAGTCAAAGAAATGAAACGTCTGTTACGC 720  
 E Q Y C I D L S V G S I E T I I H E K M  
 GAACAATATTGTATTGACCTTTCGGTTGGTTCCATTGAAACCATTATTCACGAAAAAATG 780  
 F M R K V C A R W V P R E L T A A H K A  
 TTCATGCGTAAAGTTTGTGCTCGTTGGGTGCCGCGCAACTGACTGCAGCTCACAAAGCT 840  
 Q R V A A G D E F F L Q I K E F G Q E E  
 CAGCGTGTAGCAGCAGGAGACGAATTTTTTCTGCAAATTAAGAATTTGGTCAAGAGGAG 900  
 V Y Q S I V T G D E T W V H H Y T P E T  
 GTTTACCAAAGTATAGTCACGGGTGATGAAACATGGGTGCATCAC TATACCTCTGAAACC 960  
 K K Q S M S W I G P G E K S P T K F K T  
 AAGAAACAATCCATGTCTTGGATCGGGCCGGGAGAAAAATCCCCGACGAAGTTCAAACG 1020  
 Q N S A G K V M L T V F W D A E G V L L  
 CAAAATTC TGCCGGGAAAGTGATGCTCACAGTTTTTTTGGGATGCAGAAGGTGTCTCCTG 1080  
 E D Y L E K G R T I N A E Y Y C G I L D  
 GAGGATTATCTTGAAAAAGGCAGAACAATCAATGCTGAATATTATTGCGGCATTCTGGAT 1140  
 R L R R A I Q N K R R G K L R R G V L F  
 CGGTTAAGACGAGCTATCCAGAATAAGCGCCGCGGAAATTGAGACGGGGTGTCTTTTT 1200  
 L H D N A R P H A A A I S K D R L A S F  
 CTCCACGACAATGCGCGCCACATGCTGCAGCCATTTCAAAGGATCGTTTAGCATCATTC 1260  
 K W E V F P H P P Y S P D L A P S D Y H  
 AAATGGGAAGTATTCCCACATCCTCCTTACTCTCTGATTTGGCACC GT CAGACTACCAT 1320  
 L F P Y L K A E L G G I H F E S V E E L  
 CTATTTCCGTACCTAAAGGCAGAACTTGGGGGAATTCATTTTGAATCCGTAGAAGAGCTT 1380  
 K Q A V H T F F I S Q P K E F Y A C G I  
 AAACAAGCCGTCCACACCTTCTTCATTAGTCAGCCGAAGGAATTTTACGCGTGTGGCATC 1440  
 H K L S T R Y R K C L D R A G D Y V E K  
 CACAAGCTGTCCACTCGGTACCGGAAGTGCTTGGATCGGGCTGGTGACTATGTGGAGAAG 1500  
 \*  
 TAAGGTAAGCCCCCTTATCTACATATATCTTATTTGTATTTTCGGCAGGGATGAACGATG 1560  
 GAAGCCTTGGCGAAGAAGCTGCTCTCTTTTCGCTGACTTAAAATACCCGCGGATTTGGCG 1620  
 GGAGCGGCGCGCGCTTCGGCGCGTTCAAACGGCTCGCGTTTCGGCCGCAAATGGTCCGATT 1680  
 TTAGTGCGGTTTGTTTTGTGTGAGCTCAGAAATATCCTAAGGAAGATTTTAAGCCCAAGTTT 1740  
 TTA AAAATGGTCCATTTTATAGATTTTAGAGGGGGGGGATACTTACTTATTGAACGCC 1800  
 CCTCGTA 1807
